# Supplementary material for: Worldwide trends in blood pressure from 1975 to 2015: a pooled analysis of 1479 population-based measurement studies with 19·1 million participants
Source: PubMed Central journal article supplement (PMC5220163; doi:10.1016/s0140-6736(16)31919-5), 2017-01-07
Supplement: mmc1.pdf [file mmc1.pdf]

# THE LANCET

## Supplementary appendix

This appendix formed part of the original submission and has been peer reviewed. We post it as supplied by the authors.

Supplement to: NCD Risk Factor Collaboration (NCD-RisC). Worldwide trends in blood pressure from 1975 to 2015: a pooled analysis of 1479 population-based measurement studies with 19·1 million participants. *Lancet* 2016; published online Nov 15. [http://dx.doi.org/10.1016/S0140-6736\(16\)31919-5](http://dx.doi.org/10.1016/S0140-6736(16)31919-5).

## **Appendix**

### **Worldwide trends in blood pressure from 1975 to 2015: a pooled analysis of 1,479 population-based measurement studies with 19.1 million participants**

NCD Risk Factor Collaboration (NCD-RisC)

## Table of Contents

|                                                                                                                                                                                                                                                                                      |     |
|--------------------------------------------------------------------------------------------------------------------------------------------------------------------------------------------------------------------------------------------------------------------------------------|-----|
| <b>Appendix 1:</b> Data sources .....                                                                                                                                                                                                                                                | 2   |
| <b>Appendix 2:</b> Converting to primary blood pressure metrics.....                                                                                                                                                                                                                 | 7   |
| <b>Appendix 3:</b> Model covariates .....                                                                                                                                                                                                                                            | 9   |
| <b>Appendix 4:</b> Validation of statistical model .....                                                                                                                                                                                                                             | 11  |
| <b>Appendix Table 1:</b> List of analysis regions and “super-regions”, and countries in each region.....                                                                                                                                                                             | 14  |
| <b>Appendix Table 2:</b> Data sources used in the analysis. ....                                                                                                                                                                                                                     | 16  |
| <b>Appendix Table 3:</b> Model specifications and regression coefficients to estimate the primary outcomes (mean SBP, mean DBP, and prevalence of raised blood pressure defined by SBP $\geq$ 140 mmHg or DBP $\geq$ 90 mmHg) from other metrics. ....                               | 44  |
| <b>Appendix Table 4:</b> Results of model validation.....                                                                                                                                                                                                                            | 153 |
| <b>Appendix Table 5:</b> Mean systolic blood pressure, mean diastolic blood pressure and prevalence of raised blood pressure by sex and age group for the world and nine super-regions in 1975, 1985, 1995, 2005 and 2015.....                                                       | 166 |
| <b>Appendix Figure 1:</b> Flowchart of secondary search for data sources. ....                                                                                                                                                                                                       | 191 |
| <b>Appendix Figure 2:</b> Number of data sources by country. ....                                                                                                                                                                                                                    | 193 |
| <b>Appendix Figure 3:</b> Number of data sources by region and year. ....                                                                                                                                                                                                            | 195 |
| <b>Appendix Figure 4:</b> Comparison of age-standardised mean systolic blood pressure, mean diastolic blood pressure and prevalence of raised blood pressure in the main analysis, which used data from 1975 to 2015, with a sensitivity analysis using data from 1990 to 2015. .... | 197 |
| <b>Appendix Figure 5:</b> Trends in age-standardised mean systolic and diastolic blood pressure by sex and country in people aged 18 years and older. ....                                                                                                                           | 199 |
| <b>Appendix Figure 6:</b> Trends in age-standardised and crude prevalence of raised blood pressure by sex and country in people aged 18 years and older. ....                                                                                                                        | 267 |
| <b>References</b> .....                                                                                                                                                                                                                                                              | 335 |

## **Appendix 1: Data sources**

### *Data inclusion and exclusion*

Data sources were included in NCD-RisC database if:

- measured data on systolic blood pressure (SBP) and/or diastolic blood pressure (DBP) were available;
- study participants were ten years of age and older;
- data were collected using a probabilistic sampling method with a defined sampling frame;
- data were from population samples at the national, sub-national (i.e. covering one or more sub-national regions), or community (one or a small number of communities) level;
- data were collected in or after 1950;
- data were from the countries and territories listed in Appendix Table 1.

We excluded all data sources that included only hypertension diagnosis history or medication status without measurement of blood pressure. We also excluded data sources on population subgroups whose blood pressure levels may differ systematically from the general population, including:

- studies that had included or excluded people based on their health status or cardiovascular risk;
- ethnic minorities;
- specific educational, occupational, or socioeconomic subgroups of the population; and
- those recruited through health facilities, with the exception noted below.

We used school-based data in countries where secondary school enrolment was 70% or higher, and used data whose sampling frame was health insurance schemes in countries where at least 80% of the population were insured. In addition, we used data collected through general practice and primary care system in high-income countries with universal insurance, because contact with the primary care systems tends to be at least as good as response rates for population-based surveys.

In this paper, we used data from the NCD-RisC database for years 1975 through 2015, and among subjects aged 18 years and older.

#### *Primary routes for data access*

We used a database of population-based data on cardiometabolic risk factors collated by the NCD Risk Factor Collaboration (NCD-RisC), a worldwide network of health researchers and practitioners whose aim is to understand the worldwide trends and variations in NCD risk factors. The initial database was collated through multiple routes for identifying and accessing data. We accessed publicly available population-based multi-country and national measurement surveys (e.g., Demographic and Health Surveys, and surveys identified via the Inter-University Consortium for Political and Social Research and European Health Interview & Health Examination Surveys Database) as well as the World Health Organization (WHO) STEPwise approach to Surveillance (STEPS) surveys. We requested, via WHO and its regional offices, from ministries of health and other national health and statistical agencies to identify and access population-based surveys. Requests were also sent via the World Heart Federation to its national partners. We made a similar request to the co-authors of an earlier pooled analysis of cardiometabolic risk factors,<sup>1-4</sup> and invited them to reanalyse data from their studies and join NCD-RisC. NCD-RisC database is continuously updated through the

above routes and through periodic requests to NCD-RisC members to help identify new data sources.

Anonymised individual record data from sources included in NCD-RisC were reanalysed by the Pooled Analysis and Writing Group or by data holders according to a common protocol. Within each survey, we included participants aged 18 years and older who were not pregnant. We dropped participants with implausible SBP (defined as SBP <70 mmHg or SBP >270 mmHg; 0.09% of all SBP data) or DBP (DBP <50 mmHg or DBP >150 mmHg; 0.07% of all DBP data).

We calculated mean SBP, mean DBP and prevalence of raised blood pressure defined as systolic blood pressure (SBP)  $\geq 140$  mmHg or diastolic blood pressure (DBP)  $\geq 90$  mmHg, and associated standard errors and sample sizes, by sex and age group (18-19 years, 20-29 years, followed by 10-year age groups and 80+ years). All analyses incorporated appropriate sample weights and complex survey design in calculating age-sex-specific means and prevalences when applicable. To ensure summaries were prepared according to the study protocol, the Pooled Analysis and Writing Group provided computer code to NCD-RisC members who requested assistance. All submitted data were checked by at least two independent members of the Pooled Analysis and Writing Group. Questions and clarifications were discussed with NCD-RisC members and resolved before data were incorporated in the database.

Finally, we obtained data not accessed through the above routes by extracting from published reports of all additional national health surveys identified through the above-described strategies, four sub-national STEPS surveys, 12 CINDI surveys, eight MONICA surveys

which were not deposited in MONICA Data Centre. We restricted the extractions to those reports that had reported data by sex and in age groups no wider than 20 years. We also used data from a previous pooling study<sup>2</sup> when such data did not overlap with those accessed through the above routes.

#### *Secondary search for additional data sources*

To identify any major sources not accessed through the above routes, we searched Medline (via PubMed) for articles published between 1<sup>st</sup> January 1950 and 19<sup>th</sup> February 2014 using the search terms ("blood pressure"[Mesh:NoExp] OR "hypertension"[Mesh:NoExp]) AND ("Humans"[Mesh]) (search for adults for articles published between 1980 and 2009 was done in a previous analysis;<sup>2</sup> those for children for all years and for adults for years prior to 1980 and after 2009 were done here). We excluded the USA from the search because multiple nationally representative health examination surveys with individual records were publicly accessible and accessed before the search had begun. Articles identified through this search were screened according to the inclusion and exclusion criteria described above. The number of articles identified and retained is summarised in Appendix Figure 1. We contacted the corresponding authors of all eligible studies and invited them to join NCD-RisC. We did similar searches for other cardiometabolic risk factors including body mass index (BMI),<sup>5</sup> height,<sup>6</sup> diabetes,<sup>7</sup> and serum cholesterol. All eligible studies were invited to analyse data on all cardiometabolic risk factors and join NCD-RisC.

#### *Data management*

For each data source accessed through the primary and secondary data access process, we recorded the available information about the study population, period of measurement, sampling approach, and measurement methods. The information about study population was

used to establish that each data source was population-based, and to assess whether it covered the whole country, multiple sub-national regions, or one or a small number of communities, and whether it was rural, urban, or combined.

We carefully checked all data sources in terms of how they met our inclusion and exclusion criteria. We identified duplicate data sources by comparing studies from the same country and year. Additionally, NCD-RisC members received the list of all data sources in the database and were asked to ensure that the included data from their country met the inclusion criteria and that there were no duplicates. Data sources used in the analysis are listed in Appendix Table 2.



## **Appendix 2:** Converting to primary blood pressure metrics

As described in Methods, our primary outcomes were mean SBP, mean DBP and prevalence of raised blood pressure defined as  $SBP \geq 140$  mmHg or  $DBP \geq 90$  mmHg, which were all available for 80% of data sources (84% of age-sex specific data points). Of the other 16% data points, from a previous global pooling<sup>2</sup> or extracted from published studies, 6% had mean SBP but not the other two primary outcomes; 6% had both mean SBP and mean DBP but not prevalence of raised blood pressure; 1% had only prevalence of raised blood pressure as defined above, and the remaining 3% had only a prevalence that differed from raised blood pressure defined above, e.g.  $SBP \geq 160$  mmHg or  $DBP \geq 95$  mmHg, or one that included use of antihypertensive medicine in the definition. In order to use these data, we developed conversion regressions to estimate the missing or all three primary outcomes from the data available.

The dependent variable in each regression was one of our primary outcomes, and the main independent variable was one or more of the above-mentioned metrics present in at least one study that did not report all three primary outcomes. The coefficients of these regressions were estimated from data sources with individual-level data which could be used to calculate all included terms, excluding data points for which there were fewer than 25 subjects. All regressions included terms for age, sex, country's income (natural logarithm of per-capita gross domestic product in 2011 international dollars), and the year of study, and regional random effects. Finally, we included interaction terms in the regressions if the interaction terms provided a better fit to the data as determined by the Bayesian Information Criteria (BIC).<sup>8</sup> In all cases, all sources of uncertainty in the conversion – including the sampling uncertainty of the original data, the uncertainty of the regression coefficients and random effects, and residuals – were carried forward by using repeated draws from their respective

distributions while accounting for the correlation among the uncertainties of regression coefficients and random effects. The regression coefficients and number of data points used to estimate the coefficients are shown in Appendix Table 3.

### **Appendix 3: Model covariates**

As stated in the main paper, our statistical model included covariates that help predict blood pressure, including average number of years of education, proportion of national population living in urban areas, and a summary measure of availability of different food types for human consumption.

Data on proportion of national population living in urban areas were from the United Nations Population Division for all countries in our analysis. Data on average number of years of education were from the Institute of Health Metrics and Evaluation Global Educational Attainment for 190 countries. We used regional averages for American Samoa, Cook Islands, Greenland, St Kitts & Nevis, Niue, Nauru, Palau, French Polynesia, Tokelau and Tuvalu. The covariate on food availability was constructed from the food balance sheets of the Food and Agriculture Organization of the United Nations, using principal component analysis of 19 food items (alcoholic beverages, animal fats, cereals, eggs, fish & seafood, fruits (excluding wine), meat, milk (excluding butter), offals, oilcrops, other aquatic products, pulses, spices, starchy roots, stimulants, sugar & sweeteners, treenuts, vegetable oils and vegetables) as described elsewhere.<sup>2,9,10</sup>

Before the principal component analysis, the data for all country-item pairs were examined manually for outliers and implausible values. We removed six country-item-year data points as outliers, and 322 as implausible, mostly from the Maldives and Namibia. In addition, we removed all data for Occupied Palestinian Territory because the pre-1996 data were implausibly low. After data cleaning, a total of 2,283 country-item-year data points (~1% of all country-item-year data points for 179 countries with data) were missing. 38% of these were for non-fish aquatic products (e.g., aquatic mammals) and were set to zero as this item

was zero in most countries with data. Another 49% were situations in which a part of the time series was missing in such a way that missing years can be filled through linear interpolation or linear extrapolation using the regional linear trends. For the remaining 13%, regional means were used. Finally, we used regional means for 21 countries without data (American Samoa, Andorra, Bahrain, Bhutan, Cook Islands, DR Congo, Equatorial Guinea, Federated States of Micronesia, Greenland, Marshall Islands, Nauru, Niue, Oman, Palau, Papua New Guinea, Puerto Rico, Qatar, Singapore, Tokelau, Tonga and Tuvalu).

#### **Appendix 4: Validation of statistical model**

We tested how well our statistical model, which is described in the main text, predicts mean blood pressure and prevalence of raised blood pressure in countries and years without data in two different tests. In Test 1, we held out all data from 10% of countries with data (i.e., created the appearance of countries with no data where we actually had data). The countries whose data were withheld were randomly selected from the following three groups: data-rich (6 or more data sources, with at least one year of data after 2000), data-poor (1 data source), and average data availability (2 to 5 data sources, or 6 or more data sources with no data after 2000). We fitted the model to the data from the remaining 90% of countries and made estimates of the held-out observations. In Test 2, we assessed other patterns of missing data by holding out 10% of our data sources, again from a mix of data-rich, data-poor, and average-data countries, as defined above. For a given country, we either held out a random one third of the country's data or all of the country's 2000-2015 data to determine, respectively, how well we filled in the gaps for countries with intermittent data and how well we estimated in countries without recent data. We fitted the model to the remaining 90% of the dataset and made estimates of the held-out observations. We repeated each test five times, holding out a different subset of data in each repetition. In both tests, we calculated the differences between the held-out data and the estimates. We also checked the 95% credible intervals of the estimates; in a model with good external predictive validity, 95% of held-out values would be included in the 95% credible intervals.

Our statistical model performed well in the validation tests. The estimates of raised blood pressure prevalence were unbiased as evidenced with median errors that were very close to zero globally (ranging from -0.6 percentage points to 0.9 percentage points for the two sexes in the two tests), and less than or equal to  $\pm 4$  percentage points in every subset of withheld

data except the -10.0 and -4.7 percentage points differences in Test 1 in South Asia for men and women respectively, and 4.9 percentage points difference in Test 1 for women in Central and Eastern Europe (Appendix Table 4). The 95% credible intervals of estimated prevalence covered 96-98% of true data, which implies good estimation of uncertainty; among all subgroups of data, coverages were  $\geq 90\%$  for both sexes. Median absolute errors ranged from 5.1 to 7.2 percentage points overall, or 2.2 to 10.2 percentage points in all subsets of withheld data.

Median errors for mean SBP and DBP were also small, and ranged from 0.10 to 0.99 mmHg for mean SBP and -0.07 to 0.50 mmHg for mean DBP globally suggesting that our estimates of mean SBP and DBP are also on average unbiased (Appendix Table 4). They were small in all subsets of withheld data: less than  $\pm 3$  mmHg for mean SBP, with two exceptions (women in high-income Asia Pacific, a super-region with only three countries one of which was held out, and in Central and Eastern Europe) in Test 1; less than or equal to  $\pm 2$  mmHg for mean DBP, also with two exceptions in Test 1 (men in South Asia and women in Central and Eastern Europe). Median absolute errors ranged from 3.5 to 4.4 mmHg for mean SBP and 2.2 to 2.8 mmHg for mean DBP overall, or less than 6 mmHg for mean SBP (except 8.3 mmHg in high-income Asia Pacific for women in Test 1) and less than or equal to 3.6 mmHg for mean DBP (except 4.3 mmHg for men in South Asia and 4.0 mmHg for women in Central and Eastern Europe in Test 1) in all subsets. Coverage globally for SBP was 86-88% in Test 1 and 74-77% in Test 2. In subsets, coverage ranged from 66% to 96%, but was mostly  $>75\%$ , with coverage generally lower in Test 2 than Test 1. For DBP, global coverage was 87-88% in Test 1 and 78-79% in Test 2. In subsets, coverage ranged from 72% to 98%, but was mostly  $>80\%$ , with coverage again generally lower in Test 2 than Test 1.

For comparison, median absolute differences between pairs of nationally representative surveys done in the same country and in the same year were 2.1 mmHg for SBP, 1.5 mmHg for DBP and 3.2 percentage points for prevalence of raised blood pressure, indicating that our estimates perform as well as running two parallel surveys in the same country and year.

Nonetheless the prediction errors were slightly larger and coverage lower than similar analyses for BMI and height (but not compared to diabetes),<sup>5-7</sup> likely because blood pressure varies more across countries in the same region than BMI and height, and because its trends over time are more complex and may include periods when blood pressure is unchanged preceding or following rises or declines in the same country. This heterogeneity makes prediction in countries and years without data harder than in the case of BMI and height, where there has been more steady change in most countries and where within-region variation is smaller.

**Appendix Table 1:** List of analysis regions and “super-regions”, and countries in each region. The hierarchical structure of the statistical model consisted of country, region, super-region, and world.

| <b>Super-region</b>                                    | <b>Region</b>                                                                                                                                                                                                                                                         |
|--------------------------------------------------------|-----------------------------------------------------------------------------------------------------------------------------------------------------------------------------------------------------------------------------------------------------------------------|
| <b>Sub-Saharan Africa (48)</b>                         | <b>Central Africa (6):</b> Angola, Central African Republic, Congo, DR Congo, Equatorial Guinea, Gabon                                                                                                                                                                |
|                                                        | <b>East Africa (17):</b> Burundi, Comoros, Djibouti, Eritrea, Ethiopia, Kenya, Madagascar, Malawi, Mauritius, Mozambique, Rwanda, Seychelles, Somalia, Sudan, Tanzania, Uganda, Zambia                                                                                |
|                                                        | <b>Southern Africa (6):</b> Botswana, Lesotho, Namibia, South Africa, Swaziland, Zimbabwe                                                                                                                                                                             |
|                                                        | <b>West Africa (19):</b> Benin, Burkina Faso, Cabo Verde, Cameroon, Chad, Cote d'Ivoire, Gambia, Ghana, Guinea, Guinea Bissau, Liberia, Mali, Mauritania, Niger, Nigeria, Sao Tome and Principe, Senegal, Sierra Leone, Togo                                          |
| <b>Central Asia, Middle East and North Africa (28)</b> | <b>Central Asia (9):</b> Armenia, Azerbaijan, Georgia, Kazakhstan, Kyrgyzstan, Mongolia, Tajikistan, Turkmenistan, Uzbekistan                                                                                                                                         |
|                                                        | <b>Middle East and North Africa (19):</b> Algeria, Bahrain, Egypt, Iran, Iraq, Jordan, Kuwait, Lebanon, Libya, Morocco, Occupied Palestinian Territory, Oman, Qatar, Saudi Arabia, Syrian Arab Republic, Tunisia, Turkey, United Arab Emirates, Yemen                 |
| <b>South Asia (6)</b>                                  | <b>South Asia (6):</b> Afghanistan, Bangladesh, Bhutan, India, Nepal, Pakistan                                                                                                                                                                                        |
| <b>East and Southeast Asia (16)</b>                    | <b>East Asia (4):</b> China, China (Hong Kong SAR), North Korea, Taiwan                                                                                                                                                                                               |
|                                                        | <b>Southeast Asia (12):</b> Brunei Darussalam, Cambodia, Indonesia, Lao PDR, Malaysia, Maldives, Myanmar, Philippines, Sri Lanka, Thailand, Timor-Leste, Viet Nam                                                                                                     |
| <b>Oceania (17)</b>                                    | <b>Polynesia and Micronesia (13):</b> American Samoa, Cook Islands, French Polynesia, Kiribati, Marshall Islands, Micronesia (Federated States of), Nauru, Niue, Palau, Samoa, Tokelau, Tonga, Tuvalu                                                                 |
|                                                        | <b>Melanesia (4):</b> Fiji, Papua New Guinea, Solomon Islands, Vanuatu                                                                                                                                                                                                |
| <b>High-income Asia Pacific (3)</b>                    | <b>High-income Asia Pacific (3):</b> Japan, Singapore, South Korea                                                                                                                                                                                                    |
| <b>Latin America and Caribbean (35)</b>                | <b>Andean Latin America (3):</b> Bolivia, Ecuador, Peru                                                                                                                                                                                                               |
|                                                        | <b>Caribbean (18):</b> Antigua and Barbuda, Bahamas, Barbados, Belize, Bermuda, Cuba, Dominica, Dominican Republic, Grenada, Guyana, Haiti, Jamaica, Puerto Rico, Saint Kitts and Nevis, Saint Lucia, Saint Vincent and the Grenadines, Suriname, Trinidad and Tobago |
|                                                        | <b>Central Latin America (9):</b> Colombia, Costa Rica, El Salvador, Guatemala, Honduras, Mexico, Nicaragua, Panama, Venezuela                                                                                                                                        |
|                                                        | <b>Southern Latin America (5):</b> Argentina, Brazil, Chile, Paraguay, Uruguay                                                                                                                                                                                        |
| <b>High-income Western countries (27)</b>              | <b>High-income English-speaking countries* (6):</b> Australia, Canada, Ireland, New Zealand, United Kingdom, United States of America                                                                                                                                 |
|                                                        | <b>North Western Europe (12):</b> Austria, Belgium, Denmark, Finland, Germany, Greenland, Iceland, Luxembourg, Netherlands, Norway, Sweden, Switzerland                                                                                                               |
|                                                        | <b>South Western Europe (9):</b> Andorra, Cyprus, France, Greece, Israel, Italy, Malta, Portugal, Spain                                                                                                                                                               |



|                                        |                                                                                                                                                                                    |
|----------------------------------------|------------------------------------------------------------------------------------------------------------------------------------------------------------------------------------|
| <b>Central and Eastern Europe (20)</b> | <b>Central Europe (13):</b> Albania, Bosnia and Herzegovina, Bulgaria, Croatia, Czech Republic, Hungary, Macedonia (TFYR), Montenegro, Poland, Romania, Serbia, Slovakia, Slovenia |
|                                        | <b>Eastern Europe (7):</b> Belarus, Estonia, Latvia, Lithuania, Moldova, Russian Federation, Ukraine                                                                               |

\* Although high-income English-speaking countries are geographically separated, they exhibit remarkably similar trends in cardiometabolic risk factors and outcomes.<sup>5-7</sup> They were therefore grouped together so that the statistical model shares information amongst them more than it does with other countries that are geographically closer but epidemiologically more distinct.

We did not have data on population by age group for American Samoa, Bermuda, French Polynesia, Greenland, and Tokelau. Country-specific estimates were made but were not used in calculation of regional and global prevalences because the latter requires weighting by age-specific population.

**Appendix Table 2:** Data sources used in the analysis.

|    | Country        | Data years | Survey/Study name/Citation                                                                                                   | Level of representativeness | Rural, urban, or both | Age range as used for global analysis |        | Sample size |        | Type of blood pressure measurement device <sup>1</sup> | Note |
|----|----------------|------------|------------------------------------------------------------------------------------------------------------------------------|-----------------------------|-----------------------|---------------------------------------|--------|-------------|--------|--------------------------------------------------------|------|
|    |                |            |                                                                                                                              |                             |                       | Male                                  | Female | Male        | Female |                                                        |      |
| 1  | Albania        | 2001       | Shapo et al., J Epidemiol Community Health 2003; 57: 734-9                                                                   | Community                   | urban                 | 25+                                   | 25+    | 535         | 585    | Unknown                                                |      |
| 2  | Albania        | 2008-2009  | DHS                                                                                                                          | National                    | both                  | 18-49                                 | 18-49  | 2,445       | 3,086  | Digital                                                |      |
| 3  | Algeria        | 2003       | STEPS                                                                                                                        | Community                   | both                  | 25-64                                 | 25-64  | 1,612       | 2,450  | Digital                                                |      |
| 4  | Algeria        | 2007-2009  | The ISOR (InSulino-resistance in ORan) study                                                                                 | Community                   | urban                 | 30-64                                 | 30-64  | 377         | 405    | Standard                                               |      |
| 5  | American Samoa | 1976-1978  | McGarvey, Am J Clin Nutr 1991;53: 1586S-94S                                                                                  | National                    | both                  | 18+                                   | 18+    | 859         | 1,220  | Standard                                               |      |
| 6  | American Samoa | 1994       | McGarvey, Pac Health Dialog 2001; 8: 157-62                                                                                  | National                    | both                  | 25+                                   | 25-79  | 167         | 242    | Standard                                               |      |
| 7  | American Samoa | 2004       | STEPS                                                                                                                        | National                    | both                  | 25-64                                 | 25-64  | 950         | 1,062  | Digital                                                |      |
| 8  | Argentina      | 1985-1986  | INTERSALT                                                                                                                    | Community                   | urban                 | 20-59                                 | 20-59  | 100         | 100    | Random-zero                                            |      |
| 9  | Argentina      | 1997       | de Sere day et al., Diabetes Metab 2004; 30: 335-9                                                                           | Subnational                 | urban                 | 20-59                                 | 20-59  | 834         | 1,097  | Unknown                                                |      |
| 10 | Argentina      | 2004-2005  | CArdiovascular Risk factors Multiple Evaluation in Latin America (CARMELA)                                                   | Community                   | urban                 | 25-64                                 | 25-64  | 734         | 748    | Standard                                               |      |
| 11 | Argentina      | 2005       | Encuesta Nacional de Nutricion y Salud 2005                                                                                  | National                    | both                  |                                       | 18-49  |             | 4,778  | Standard                                               |      |
| 12 | Argentina      | 2008-2011  | The VELA Project                                                                                                             | Community                   | rural                 | 20+                                   | 20+    | 134         | 252    | Digital                                                |      |
| 13 | Argentina      | 2011-2012  | Detection and follow-up of cardiovascular disease and risk factors in the Southern Cone of Latin America. The CESCAS I Study | Community                   | urban                 | 35-74                                 | 35-74  | 1,589       | 2,397  | Standard                                               |      |
| 14 | Armenia        | 2005       | DHS                                                                                                                          | National                    | both                  | 18-49                                 | 18-49  | 1,011       | 5,510  | Digital                                                |      |
| 15 | Australia      | 1975       | Busselton Health Study                                                                                                       | Community                   | urban                 | 18-84                                 | 18+    | 373         | 420    | Standard                                               |      |
| 16 | Australia      | 1978       | Busselton Health Study                                                                                                       | Community                   | urban                 | 18-84                                 | 18+    | 462         | 554    | Standard                                               |      |
| 17 | Australia      | 1980       | Risk Factor Prevalence Surveys                                                                                               | National                    | urban                 | 25-65                                 | 25-65  | 2,764       | 2,839  | Standard                                               |      |
| 18 | Australia      | 1981       | Busselton Health Study                                                                                                       | Community                   | urban                 | 18-84                                 | 18+    | 420         | 482    | Standard                                               |      |
| 19 | Australia      | 1983       | MONICA, Newcastle                                                                                                            | Subnational                 | urban                 | 35-64                                 | 35-64  | 1,216       | 1,244  | Random-zero                                            |      |
| 20 | Australia      | 1983       | MONICA, Perth inner                                                                                                          | Community                   | urban                 | 25-64                                 | 25-64  | 861         | 921    | Standard                                               |      |
| 21 | Australia      | 1983       | Risk Factor Prevalence Surveys                                                                                               | National                    | urban                 | 25-64                                 | 25-64  | 3,733       | 3,862  | Standard                                               |      |
| 22 | Australia      | 1988-1989  | Dubbo Study of Australian Elderly                                                                                            | Community                   | urban                 | 59+                                   | 59+    | 878         | 1,222  | Standard                                               |      |
| 23 | Australia      | 1988-1989  | MONICA, Newcastle                                                                                                            | Subnational                 | urban                 | 35-64                                 | 35-64  | 672         | 661    | Random-zero                                            |      |
| 24 | Australia      | 1988-1989  | MONICA, Newcastle                                                                                                            | Community                   | urban                 | 25-34                                 | 25-34  | 70          | 83     | Random-zero                                            |      |
| 25 | Australia      | 1988-1989  | MONICA, Perth inner                                                                                                          | Community                   | urban                 | 25-64                                 | 25-64  | 404         | 405    | Standard                                               |      |
| 26 | Australia      | 1988-1989  | MONICA, Perth outer                                                                                                          | Community                   | urban                 | 25-64                                 | 25-64  | 412         | 419    | Standard                                               |      |
| 27 | Australia      | 1989       | Risk Factor Prevalence Surveys 1989                                                                                          | National                    | urban                 | 20-69                                 | 20-69  | 4,551       | 4,727  | Standard                                               |      |
| 28 | Australia      | 1990-1991  | Canberra-Queanbeyan Longitudinal Study of the Elderly                                                                        | Community                   | urban                 | 70+                                   | 70+    | 454         | 380    | Standard                                               |      |
| 29 | Australia      | 1992-1993  | Australia Longitudinal Study of Ageing                                                                                       | Community                   | urban                 | 65+                                   | 65+    | 842         | 771    | Standard                                               |      |
| 30 | Australia      | 1993       | Blue Mountain Eyes Study II; Simons et al., Med J Aust 2005; 182: 219-22                                                     | Community                   | urban                 | 50+                                   | 50+    | 659         | 986    | Unknown                                                |      |
| 31 | Australia      | 1994       | MONICA, Newcastle                                                                                                            | Subnational                 | urban                 | 35-64                                 | 35-64  | 637         | 688    | Random-zero                                            |      |
| 32 | Australia      | 1994       | MONICA, Perth inner                                                                                                          | Community                   | urban                 | 25-64                                 | 25-64  | 363         | 350    | Standard                                               |      |
| 33 | Australia      | 1994       | MONICA, Perth outer                                                                                                          | Community                   | urban                 | 25-64                                 | 25-64  | 375         | 387    | Standard                                               |      |
| 34 | Australia      | 1995-1996  | National Nutrition Study                                                                                                     | National                    | both                  | 16+                                   | 16+    | 5,227       | 5,700  | Standard                                               | 2    |
| 35 | Australia      | 1996-1998  | Western Australian AAA Screening Program                                                                                     | Community                   | urban                 | 65-84                                 |        | 12,202      |        | Standard                                               |      |
| 36 | Australia      | 1998       | Blue Mountain Eyes Study II; Simons et al., Med J Aust 2005; 182: 219-22                                                     | Community                   | urban                 | 50+                                   | 50+    | 736         | 1,089  | Unknown                                                |      |
| 37 | Australia      | 1999-2000  | The Australian Diabetes, Obesity and Lifestyle Study 1999-2000                                                               | National                    | both                  | 25+                                   | 25+    | 5,019       | 6,112  | Unknown                                                |      |
| 38 | Australia      | 1999-2003  | North West Adelaide Health Study                                                                                             | Community                   | urban                 | 18+                                   | 18+    | 1,932       | 2,123  | Standard                                               |      |
| 39 | Australia      | 2004-2005  | The Australian Diabetes, Obesity and Lifestyle Study 2004-2005                                                               | National                    | both                  | 30+                                   | 30+    | 2,885       | 3,478  | Digital                                                |      |
| 40 | Australia      | 2004-2006  | North West Adelaide Health Study                                                                                             | Community                   | urban                 | 20+                                   | 20+    | 1,515       | 1,669  | Standard                                               |      |
| 41 | Australia      | 2008-2010  | North West Adelaide Health Study                                                                                             | Community                   | urban                 | 24+                                   | 24+    | 1,169       | 1,317  | Standard                                               |      |
| 42 | Australia      | 2011-2012  | Australian Health Survey                                                                                                     | National                    | both                  | 20+                                   | 20+    | 9,749       | 10,779 | Digital                                                |      |
| 43 | Australia      | 2012       | The Australian Diabetes, Obesity and Lifestyle Study 2012                                                                    | National                    | both                  | 37+                                   | 37+    | 2,047       | 2,531  | Digital                                                |      |
| 44 | Austria        | 1986       | CINDI                                                                                                                        | Community                   | both                  | 25-64                                 | 25-64  | 647         | 700    | Unknown                                                |      |
| 45 | Austria        | 1991       | CINDI                                                                                                                        | Subnational                 | both                  | 25-64                                 | 25-64  | 701         | 744    | Standard                                               |      |
| 46 | Austria        | 1992       | Vorarlberg Health Monitoring and Promotion Programme                                                                         | Subnational                 | rural                 | 18+                                   | 18+    | 14,161      | 18,826 | Standard                                               |      |
| 47 | Austria        | 1998       | Vorarlberg Health Monitoring and Promotion Programme                                                                         | Subnational                 | rural                 | 18+                                   | 18+    | 16,154      | 20,917 | Standard                                               |      |
| 48 | Austria        | 2004       | Vorarlberg Health Monitoring and Promotion Programme                                                                         | Subnational                 | rural                 | 18+                                   | 18+    | 20,161      | 23,893 | Standard                                               |      |
| 49 | Azerbaijan     | 2006       | DHS                                                                                                                          | National                    | both                  | 18-59                                 | 18-49  | 2,259       | 7,254  | Digital                                                |      |
| 50 | Bahrain        | 1995-1996  | National Population Register in Bahrain; Al-Mahroos et al., Int J Epidemiol 2000; 29:71-6                                    | National                    | both                  | 40-59                                 | 50-69  | 1,218       | 872    | Standard                                               |      |
| 51 | Bangladesh     | 2011       | DHS                                                                                                                          | National                    | both                  | 30+                                   | 30+    | 3,905       | 3,952  | Digital                                                |      |
| 52 | Bangladesh     | 2015       | An assessment of BRAC Health Nutrition and Population Programme and benchmark survey of Sustainable Development Goal         | National                    | rural                 | 35+                                   | 35+    | 5,254       | 5,694  | Standard                                               |      |
| 53 | Barbados       | 1990       | Barbados Eye Studies; Hennis et al., Ophthalmology 2003; 110: 908-14                                                         | National                    | both                  | 40-84                                 | 40-84  | 1,988       | 2,635  | Unknown                                                |      |
| 54 | Barbados       | 2011-2013  | Health of the Nation (HotN)                                                                                                  | National                    | both                  | 25+                                   | 25+    | 470         | 739    | Digital                                                |      |
| 55 | Belarus        | 1985       | CINDI                                                                                                                        | Community                   | both                  | 35-64                                 |        | 4,154       |        | Unknown                                                |      |

|     | Country                | Data years | Survey/Study name/Citation                                                                                                                                                        | Level of representativeness | Rural, urban, or both | Age range as used for global analysis |        | Sample size |        | Type of blood pressure measurement device <sup>1</sup> | Note |
|-----|------------------------|------------|-----------------------------------------------------------------------------------------------------------------------------------------------------------------------------------|-----------------------------|-----------------------|---------------------------------------|--------|-------------|--------|--------------------------------------------------------|------|
|     |                        |            |                                                                                                                                                                                   |                             |                       | Male                                  | Female | Male        | Female |                                                        |      |
| 56  | Belgium                | 1983-1985  | MONICA, Luxembourg                                                                                                                                                                | Community                   | urban                 | 35-64                                 | 35-64  | 975         | 946    | Random-zero                                            |      |
| 57  | Belgium                | 1984-1985  | Belgian Interuniversity Research on Nutrition and Health                                                                                                                          | National                    | both                  | 25-74                                 | 25-74  | 5,899       | 5,288  | Random-zero                                            |      |
| 58  | Belgium                | 1985-1987  | INTERSALT, Charleroi                                                                                                                                                              | Community                   | urban                 | 20-59                                 | 20-59  | 82          | 75     | Random-zero                                            |      |
| 59  | Belgium                | 1985-1986  | INTERSALT, Ghent                                                                                                                                                                  | Community                   | urban                 | 20-59                                 | 20-59  | 100         | 100    | Random-zero                                            |      |
| 60  | Belgium                | 1985-1987  | MONICA, Charleroi                                                                                                                                                                 | Community                   | urban                 | 25-64                                 | 25-64  | 346         | 326    | Random-zero                                            |      |
| 61  | Belgium                | 1985-1987  | MONICA, Ghent                                                                                                                                                                     | Community                   | urban                 | 25-64                                 | 25-64  | 550         | 459    | Random-zero                                            |      |
| 62  | Belgium                | 1985-1990  | Flemish Study on Environment, Genes and Health Outcomes                                                                                                                           | Community                   | rural                 | 20-90                                 | 20-90  | 659         | 696    | Standard                                               |      |
| 63  | Belgium                | 1987-1990  | MONICA, Charleroi                                                                                                                                                                 | Community                   | urban                 | 25-64                                 | 25-64  | 325         | 301    | Random-zero                                            |      |
| 64  | Belgium                | 1988-1990  | MONICA, Ghent                                                                                                                                                                     | Community                   | urban                 | 25-64                                 | 25-64  | 456         | 449    | Random-zero                                            |      |
| 65  | Belgium                | 1990-1993  | MONICA, Charleroi                                                                                                                                                                 | Community                   | urban                 | 25-64                                 | 25-64  | 337         | 332    | Random-zero                                            |      |
| 66  | Belgium                | 1990-1992  | MONICA, Ghent                                                                                                                                                                     | Community                   | urban                 | 25-64                                 | 25-64  | 509         | 475    | Random-zero                                            |      |
| 67  | Belgium                | 1991-1994  | Flemish Study on Environment, Genes and Health Outcomes                                                                                                                           | Community                   | rural                 | 26-88                                 | 26-88  | 394         | 416    | Standard                                               |      |
| 68  | Belgium                | 1992-1995  | Flemish Study on Environment, Genes and Health Outcomes                                                                                                                           | Community                   | rural                 | 27-89                                 | 27-89  | 298         | 312    | Standard                                               |      |
| 69  | Belgium                | 1994-1996  | BIRNH Elderly: Belgian Interuniversity Research on Nutrition and Health in the Elderly                                                                                            | National                    | both                  | 65-89                                 | 65-89  | 1,159       | 980    | Random-zero                                            |      |
| 70  | Belgium                | 1996-1998  | Flemish Study on Environment, Genes and Health Outcomes                                                                                                                           | Community                   | rural                 | 18-84                                 | 18-84  | 354         | 347    | Standard                                               |      |
| 71  | Belgium                | 1998       | Flemish Study on Environment, Genes and Health Outcomes                                                                                                                           | Community                   | rural                 | 32-86                                 | 32-86  | 320         | 359    | Standard                                               |      |
| 72  | Belgium                | 1998-2000  | Flemish Study on Environment, Genes and Health Outcomes                                                                                                                           | Community                   | rural                 | 18-79                                 | 18-79  | 199         | 196    | Standard                                               |      |
| 73  | Belgium                | 1999-2001  | Flemish Study on Environment, Genes and Health Outcomes                                                                                                                           | Community                   | rural                 | 18-81                                 | 18-79  | 213         | 227    | Standard                                               |      |
| 74  | Belgium                | 2001       | Flemish Study on Environment, Genes and Health Outcomes                                                                                                                           | Community                   | rural                 | 18-78                                 | 18-78  | 230         | 208    | Standard                                               |      |
| 75  | Belgium                | 2002-2003  | Flemish Study on Environment, Genes and Health Outcomes                                                                                                                           | Community                   | rural                 | 18-81                                 | 18-81  | 169         | 181    | Standard                                               |      |
| 76  | Belgium                | 2003       | The European Male Ageing Study (EMAS)                                                                                                                                             | Community                   | both                  | 40+                                   |        | 447         |        | Digital                                                |      |
| 77  | Belgium                | 2002-2005  | Flemish Study on Environment, Genes and Health Outcomes                                                                                                                           | Community                   | rural                 | 18-88                                 | 18-88  | 391         | 404    | Standard                                               |      |
| 78  | Belgium                | 2005-2008  | Flemish Study on Environment, Genes and Health Outcomes                                                                                                                           | Community                   | rural                 | 18-89                                 | 18-89  | 449         | 456    | Standard                                               |      |
| 79  | Belgium                | 2008       | The European Male Ageing Study (EMAS)                                                                                                                                             | Community                   | both                  | 40+                                   |        | 385         |        | Digital                                                |      |
| 80  | Belgium                | 2009-2013  | Flemish Study on Environment, Genes and Health Outcomes                                                                                                                           | Community                   | rural                 | 20-88                                 | 20-88  | 330         | 335    | Standard                                               |      |
| 81  | Belgium                | 2010-2015  | Flemish Study on Environment, Genes and Health Outcomes                                                                                                                           | Community                   | rural                 | 18-87                                 | 18-87  | 389         | 410    | Standard                                               |      |
| 82  | Belize                 | 2004-2005  | CAMDI                                                                                                                                                                             | National                    | both                  | 20+                                   | 20+    | 999         | 1,434  | Digital                                                |      |
| 83  | Benin                  | 2007       | STEPS                                                                                                                                                                             | Community                   | urban                 | 25-64                                 | 25-64  | 954         | 1,468  | Digital                                                |      |
| 84  | Benin                  | 2008       | STEPS                                                                                                                                                                             | National                    | both                  | 25-64                                 | 25-64  | 3,445       | 3,383  | Digital                                                |      |
| 85  | Benin                  | 2011-2012  | DHS                                                                                                                                                                               | National                    | both                  | 30-64                                 | 18-49  | 2,681       | 4,200  | Digital                                                |      |
| 86  | Bhutan                 | 2007       | STEPS                                                                                                                                                                             | Community                   | urban                 | 25-74                                 | 25-74  | 1,131       | 1,328  | Digital                                                |      |
| 87  | Bhutan                 | 2014       | STEPS                                                                                                                                                                             | National                    | both                  | 18-69                                 | 18-69  | 1,071       | 1,680  | Digital                                                |      |
| 88  | Bolivia                | 2005-2007  | Cardiovascular and metabolic syndrome risk assessment of Bolivian school children and adolescents - Relationships to obesity, diabetes, income, food intake and physical activity | National                    | both                  | 18-18                                 | 18-18  | 136         | 134    | Digital                                                |      |
| 89  | Bosnia and Herzegovina | 2002       | Non-communicable disease risk factor survey, Federation of B&H                                                                                                                    | Subnational                 | both                  | 25-64                                 | 25-64  | 1,119       | 1,621  | Standard                                               |      |
| 90  | Bosnia and Herzegovina | 2012       | Non-communicable disease risk factor survey, Federation of B&H                                                                                                                    | Subnational                 | rural                 | 18+                                   | 18+    | 1,177       | 1,287  | Standard                                               |      |
| 91  | Bosnia and Herzegovina | 2012       | Non-communicable disease risk factor survey, Federation of B&H                                                                                                                    | Subnational                 | urban                 | 18+                                   | 18+    | 589         | 706    | Standard                                               |      |
| 92  | Botswana               | 2007       | STEPS                                                                                                                                                                             | National                    | both                  | 25-64                                 | 25-64  | 1,266       | 2,600  | Digital                                                |      |
| 93  | Botswana               | 2014       | STEPS                                                                                                                                                                             | National                    | both                  | 18-69                                 | 18-69  | 1,238       | 2,516  | Digital                                                |      |
| 94  | Brazil                 | 1987       | de Lolio, Arq Bras Cardiol 1990; 55: 167-73                                                                                                                                       | Community                   | urban                 | 25-74                                 | 25-74  | 608         | 620    | Unknown                                                |      |
| 95  | Brazil                 | 1991       | Fornes et al., Rev Saude Publica 2002; 36: 12-8                                                                                                                                   | Community                   | urban                 | 25+                                   | 25+    | 388         | 546    | Unknown                                                |      |
| 96  | Brazil                 | 1992       | EPIDOSO; Ramos et al., Rev Saude Publica 1998; 32: 397-407                                                                                                                        | Community                   | urban                 | 65+                                   | 65+    | 271         | 474    | Unknown                                                |      |
| 97  | Brazil                 | 1995-1996  | Cohort study from Porto Alegre                                                                                                                                                    | Community                   | both                  | 18+                                   | 18+    | 490         | 596    | Standard                                               |      |
| 98  | Brazil                 | 1996-1997  | The Bambui Cohort Study of Ageing                                                                                                                                                 | Community                   | urban                 | 18+                                   | 18+    | 947         | 1,367  | Standard                                               |      |
| 99  | Brazil                 | 1998       | Frietas et al., Arq Bras Cardiol 2001; 77: 9-21                                                                                                                                   | Subnational                 | urban                 | 18-99                                 | 18-99  | 286         | 400    | Unknown                                                |      |
| 100 | Brazil                 | 1999       | Lessa et al., Arq Bras Cardiol 2006; 87: 747-56                                                                                                                                   | Community                   | urban                 | 20+                                   | 20+    | 609         | 830    | Unknown                                                |      |
| 101 | Brazil                 | 2000       | 1982 Pelotas Birth Cohort                                                                                                                                                         | Community                   | urban                 | 18-18                                 |        | 2,228       |        | Standard                                               |      |
| 102 | Brazil                 | 1999-2000  | Pelotas cross-sectional survey                                                                                                                                                    | Community                   | urban                 | 20-69                                 | 20-69  | 844         | 1,116  | Standard                                               |      |
| 103 | Brazil                 | 2002       | Marcopito et al., Rev Saude Publica 2005; 39: 738-45                                                                                                                              | Community                   | urban                 | 15-59                                 | 15-59  | 978         | 1,125  | Unknown                                                | 2    |
| 104 | Brazil                 | 2003       | Pereira et al., Cad Saude Publica 2007; 23: 2363-74                                                                                                                               | Community                   | urban                 | 18-59                                 | 18-59  | 243         | 322    | Unknown                                                |      |
| 105 | Brazil                 | 2003       | Hartmann et al., Cad Saude Publica 2007; 23: 1857-66                                                                                                                              | Community                   | urban                 |                                       | 20-60  |             | 1,020  | Unknown                                                |      |
| 106 | Brazil                 | 2004       | Marquezine et al., Int J Cardiol 2008; 129: 259-65                                                                                                                                | Community                   | urban                 | 24-64                                 | 24-64  | 710         | 851    | Unknown                                                |      |
| 107 | Brazil                 | 2004       | de Castro et al., Arq Bras Cardiol 2007; 88: 334-9                                                                                                                                | Community                   | urban                 | 18+                                   | 18+    | 131         | 154    | Unknown                                                |      |
| 108 | Brazil                 | 2003-2005  | São Paulo Ageing & Health Study                                                                                                                                                   | Community                   | urban                 | 65+                                   | 65+    | 782         | 1,200  | Digital                                                |      |
| 109 | Brazil                 | 2004-2006  | Hearts of Brazil                                                                                                                                                                  | National                    | urban                 | 18-79                                 | 18+    | 571         | 650    | Standard                                               |      |
| 110 | Brazil                 | 2004-2005  | 1982 Pelotas Birth Cohort                                                                                                                                                         | Community                   | urban                 | 23-23                                 | 23-23  | 2,209       | 2,083  | Digital                                                |      |
| 111 | Brazil                 | 2006       | ATTITUDE                                                                                                                                                                          | Subnational                 | both                  | 18-21                                 | 18-21  | 1,195       | 1,553  | Standard                                               |      |

|     | Country                  | Data years | Survey/Study name/Citation                                                                                                   | Level of representativeness | Rural, urban, or both | Age range as used for global analysis |        | Sample size |           | Type of blood pressure measurement device <sup>1</sup> | Note |
|-----|--------------------------|------------|------------------------------------------------------------------------------------------------------------------------------|-----------------------------|-----------------------|---------------------------------------|--------|-------------|-----------|--------------------------------------------------------|------|
|     |                          |            |                                                                                                                              |                             |                       | Male                                  | Female | Male        | Female    |                                                        |      |
| 112 | Brazil                   | 2006-2007  | SOFT study                                                                                                                   | Community                   | urban                 | 20+                                   | 20+    | 665         | 1,038     | Digital                                                |      |
| 113 | Brazil                   | 2008       | The Bambui Cohort Study of Ageing                                                                                            | Community                   | urban                 | 71+                                   | 71+    | 254         | 475       | Standard                                               |      |
| 114 | Brazil                   | 2009       | EPIFLORIPA Adults                                                                                                            | Community                   | urban                 | 25-64                                 | 25-64  | 633         | 796       | Unknown                                                |      |
| 115 | Brazil                   | 2009-2010  | Condições de Saúde de Idosos de Florianópolis - EpiFloripa Idoso                                                             | Community                   | urban                 | 60+                                   | 60+    | 610         | 1,070     | Digital                                                |      |
| 116 | Brazil                   | 2011       | ATTITUDE                                                                                                                     | Subnational                 | both                  | 18-19                                 | 18-19  | 685         | 840       | Digital                                                |      |
| 117 | Brazil                   | 2010-2013  | Baependi Heart Study                                                                                                         | Community                   | rural                 | 18+                                   | 18+    | 609         | 885       | Digital                                                |      |
| 118 | Brazil                   | 2011-2012  | The 1993 Pelotas (Brazil) Birth Cohort: 18 years follow-up                                                                   | Community                   | urban                 | 18-19                                 | 18-19  | 1,962       | 1,997     | Digital                                                |      |
| 119 | Brazil                   | 2012-2013  | Pelotas 1982 Birth Cohort                                                                                                    | Community                   | urban                 | 30-30                                 | 30-30  | 1,772       | 1,848     | Digital                                                |      |
| 120 | Brazil                   | 2012-2013  | Prevalence of Leptin Polymorphism Gln223Arg                                                                                  | Community                   | urban                 | 18+                                   | 18+    | 282         | 526       | Digital                                                |      |
| 121 | Bulgaria                 | 1983       | Pavlov et al., Vutr Boles 1988; 27: 55-60                                                                                    | Community                   | rural                 | 31+                                   | 31+    | 225         | 450       | Unknown                                                |      |
| 122 | Bulgaria                 | 1985       | CINDI                                                                                                                        | Community                   | both                  | 25-64                                 | 25-64  | 1,716       | 3,200     | Unknown                                                |      |
| 123 | Burkina Faso             | 2013       | STEPS                                                                                                                        | National                    | both                  | 25-64                                 | 25-64  | 2,231       | 2,255     | Digital                                                |      |
| 124 | Cabo Verde               | 2007       | STEPS                                                                                                                        | National                    | both                  | 25-64                                 | 25-64  | 663         | 1,076     | Digital                                                |      |
| 125 | Cambodia                 | 2010       | STEPS                                                                                                                        | National                    | both                  | 25-64                                 | 25-64  | 1,884       | 3,346     | Digital                                                |      |
| 126 | Cameroon                 | 1993       | Cooper et al., Am J Public Health 1997; 87: 160-8                                                                            | Subnational                 | both                  | 25-74                                 | 25-74  | 1,088       | 1,125     | Unknown                                                |      |
| 127 | Cameroon                 | 1998-1999  | ENHIP                                                                                                                        | Community                   | rural                 | 18+                                   | 18+    | 486         | 701       | Standard                                               |      |
| 128 | Cameroon                 | 1998-1999  | ENHIP                                                                                                                        | Community                   | urban                 | 18+                                   | 18-79  | 430         | 538       | Standard                                               |      |
| 129 | Cameroon                 | 2000       |                                                                                                                              | Community                   | urban                 | 35-54                                 | 35-54  | 448         | 567       | Unknown                                                |      |
| 130 | Cameroon                 | 2003       | STEPS                                                                                                                        | Subnational                 | urban                 | 18+                                   | 18+    | 3,379       | 5,048     | Digital                                                |      |
| 131 | Cameroon                 | 2007       | Cameroon Burden of Diabetes - Second Survey                                                                                  | Subnational                 | urban                 | 18+                                   | 18+    | 3,118       | 4,107     | Digital                                                |      |
| 132 | Canada                   | 1981       | Canada Fitness Survey                                                                                                        | National                    | both                  | 20-65                                 | 20-65  | 4,699       | 5,310     | Standard                                               |      |
| 133 | Canada                   | 1983       | McIntyre and Shah, CMAJ 1986; 134: 345-9                                                                                     | Community                   | rural                 | 15+                                   | 15+    | 328         | 340       | Unknown                                                | 2    |
| 134 | Canada                   | 1985       | CINDI                                                                                                                        | Community                   | both                  | 25-64                                 | 25-64  | 633         | 683       | Unknown                                                |      |
| 135 | Canada                   | 1985-1986  | INTERSALT, StJohns                                                                                                           | Community                   | urban                 | 20-59                                 | 20-59  | 100         | 100       | Random-zero                                            |      |
| 136 | Canada                   | 1985-1988  | MONICA, Halifax                                                                                                              | Community                   | both                  | 25-64                                 | 25-64  | 438         | 421       | Standard                                               |      |
| 137 | Canada                   | 1986-1992  | Canada Heart Health Survey                                                                                                   | National                    | both                  | 18-74                                 | 18-74  | 11,353      | 11,737    | Standard                                               |      |
| 138 | Canada                   | 1995       | CINDI                                                                                                                        | Community                   | urban                 | 25-64                                 | 25-64  | 940         | 964       | Unknown                                                |      |
| 139 | Canada                   | 1995       | MONICA, Halifax                                                                                                              | Community                   | both                  | 25-64                                 | 25-64  | 274         | 287       | Standard                                               |      |
| 140 | Canada                   | 2006       | Ontario Survey of the Prevalence and Control of Hypertension; Leenen et al., CMAJ 2008; 178: 1441-9                          | Community                   | urban                 | 20-79                                 | 20-79  | 1,452       | 1,540     | Unknown                                                |      |
| 141 | Canada                   | 2007-2011  | Canadian Health Measures Survey                                                                                              | National                    | both                  | 20-79                                 | 20-79  | 3,332       | 3,772     | Digital                                                |      |
| 142 | Central African Republic | 2010       | STEPS                                                                                                                        | Community                   | both                  | 25-64                                 | 25-64  | 1,863       | 1,992     | Digital                                                |      |
| 143 | Chad                     | 2008       | STEPS                                                                                                                        | Community                   | urban                 | 25-64                                 | 25-64  | 982         | 822       | Digital                                                |      |
| 144 | Chile                    | 1992-1993  | Miquel et al., Gastroenterology 1998; 115: 937-946                                                                           | Community                   | urban                 | 18+                                   | 18+    | 660         | 1,032     | Standard                                               |      |
| 145 | Chile                    | 2000       | Nervi F et al., J Hepatol 2006; 45: 299 - 305                                                                                | Community                   | urban                 | 20+                                   | 20+    | 335         | 625       | Standard                                               |      |
| 146 | Chile                    | 2003       | Encuesta Nacional de Salud                                                                                                   | National                    | both                  | 18+                                   | 18+    | 1,551       | 1,848     | Digital                                                |      |
| 147 | Chile                    | 2004-2005  | CArdiovascular Risk factors Multiple Evaluation in Latin America (CARMELA)                                                   | Community                   | urban                 | 25-64                                 | 25-64  | 783         | 872       | Standard                                               |      |
| 148 | Chile                    | 2009-2010  | Encuesta Nacional de Salud                                                                                                   | National                    | both                  | 18+                                   | 18+    | 1,890       | 2,876     | Digital                                                |      |
| 149 | Chile                    | 2011-2012  | Detection and follow-up of cardiovascular disease and risk factors in the Southern Cone of Latin America. The CESCAS I Study | Community                   | urban                 | 35-74                                 | 35-74  | 923         | 1,027     | Standard                                               |      |
| 150 | China                    | 1979-1982  | East Beijing Study 1                                                                                                         | Community                   | urban                 | 20-79                                 | 20-79  | 382         | 399       | Standard                                               |      |
| 151 | China                    | 1979-1980  | China National Hypertension Survey                                                                                           | National                    | both                  | 15+                                   | 15+    | 1,902,339   | 2,109,789 | Standard                                               | 2    |
| 152 | China                    | 1982       | China National Nutrition Survey                                                                                              | National                    | both                  | 20+                                   | 20+    | 6,222       | 7,145     | Standard                                               |      |
| 153 | China                    | 1983       | Sino-MONICA Shanghai                                                                                                         | Subnational                 | both                  | 30-64                                 | 30-64  | 624         | 630       | Standard                                               |      |
| 154 | China                    | 1985       | Chinese National Surveys on Students Constitution and Health                                                                 | National                    | both                  | 18-18                                 | 18-18  | 16,251      | 15,823    | Standard                                               |      |
| 155 | China                    | 1984-1985  | Sino-MONICA Beijing                                                                                                          | Subnational                 | both                  | 25-64                                 | 25-64  | 816         | 857       | Standard                                               |      |
| 156 | China                    | 1986       | INTERSALT, Beijing                                                                                                           | Community                   | urban                 | 20-59                                 | 20-59  | 100         | 100       | Random-zero                                            |      |
| 157 | China                    | 1986       | INTERSALT, Nanning                                                                                                           | Community                   | both                  | 20-59                                 | 20-59  | 100         | 100       | Random-zero                                            |      |
| 158 | China                    | 1986       | INTERSALT, Tianjin                                                                                                           | Community                   | urban                 | 20-59                                 | 20-59  | 100         | 100       | Random-zero                                            |      |
| 159 | China                    | 1988       | Sino-MONICA Hebei                                                                                                            | Subnational                 | both                  | 25-64                                 |        | 800         |           | Standard                                               |      |
| 160 | China                    | 1988       | Sino-MONICA Heilongjiang                                                                                                     | Subnational                 | both                  | 25-64                                 | 25-64  | 800         | 800       | Standard                                               |      |
| 161 | China                    | 1988       | Sino-MONICA Henan                                                                                                            | Subnational                 | both                  | 25-64                                 | 25-64  | 345         | 427       | Standard                                               |      |
| 162 | China                    | 1988       | Sino-MONICA Neimenggu                                                                                                        | Subnational                 | both                  | 25-64                                 | 25-64  | 397         | 400       | Standard                                               |      |
| 163 | China                    | 1988       | Sino-MONICA Sichuan                                                                                                          | Subnational                 | both                  | 25-64                                 | 25-64  | 313         | 334       | Standard                                               |      |
| 164 | China                    | 1988       | Sino-MONICA Shandong                                                                                                         | Subnational                 | both                  | 25-64                                 | 25-64  | 211         | 225       | Standard                                               |      |
| 165 | China                    | 1986-1989  | Sino-MONICA Shanghai                                                                                                         | Subnational                 | both                  | 25-64                                 | 25-64  | 675         | 753       | Standard                                               |      |
| 166 | China                    | 1988-1990  | East Beijing Study 2                                                                                                         | Community                   | urban                 | 20-84                                 | 20-84  | 138         | 150       | Standard                                               |      |
| 167 | China                    | 1989       | China Health and Nutrition Study                                                                                             | National                    | both                  | 20-45                                 | 20-45  | 2,383       | 2,570     | Standard                                               | 3    |

|     | Country | Data years | Survey/Study name/Citation                                                          | Level of representativeness | Rural, urban, or both | Age range as used for global analysis |        | Sample size |         | Type of blood pressure measurement device <sup>1</sup> | Note |
|-----|---------|------------|-------------------------------------------------------------------------------------|-----------------------------|-----------------------|---------------------------------------|--------|-------------|---------|--------------------------------------------------------|------|
|     |         |            |                                                                                     |                             |                       | Male                                  | Female | Male        | Female  |                                                        |      |
| 168 | China   | 1988-1989  | Sino-MONICA Beijing                                                                 | Subnational                 | both                  | 25-64                                 | 25-64  | 703         | 863     | Standard                                               |      |
| 169 | China   | 1989       | Sino-MONICA Fujian                                                                  | Subnational                 | both                  | 25-64                                 | 25-64  | 179         | 191     | Standard                                               |      |
| 170 | China   | 1988-1989  | Sino-MONICA Jilin                                                                   | Subnational                 | both                  | 25-64                                 | 25-64  | 394         | 408     | Standard                                               |      |
| 171 | China   | 1989       | Sino-MONICA Jiangsu                                                                 | Subnational                 | both                  | 25-64                                 | 25-64  | 398         | 399     | Standard                                               |      |
| 172 | China   | 1988-1989  | Sino-MONICA Jiangxi                                                                 | Subnational                 | both                  | 25-64                                 | 25-64  | 379         | 386     | Standard                                               |      |
| 173 | China   | 1988-1989  | Sino-MONICA Liaoning                                                                | Subnational                 | both                  | 25-64                                 | 25-64  | 728         | 734     | Standard                                               |      |
| 174 | China   | 1991       | China Health and Nutrition Study                                                    | National                    | both                  | 18+                                   | 18+    | 4,092       | 4,512   | Standard                                               | 3    |
| 175 | China   | 1991       | China National Hypertension Survey                                                  | National                    | both                  | 15+                                   | 15+    | 448,929     | 500,441 | Standard                                               | 2    |
| 176 | China   | 1990-1991  | China Prospective Study                                                             | National                    | both                  | 40-79                                 |        | 221,080     |         | Standard                                               |      |
| 177 | China   | 1991       | Sino-MONICA Shanghai                                                                | Subnational                 | both                  | 30-64                                 | 30-64  | 564         | 624     | Standard                                               |      |
| 178 | China   | 1992-1993  | Anzhen 02 Cohort Study                                                              | Community                   | urban                 | 34-65                                 | 34-65  | 2,032       | 2,120   | Standard                                               |      |
| 179 | China   | 1991-1992  | Fangshan Cohort Study                                                               | Community                   | urban                 | 34-86                                 | 34-86  | 879         | 1,746   | Standard                                               |      |
| 180 | China   | 1992       | Huashan Study                                                                       | Community                   | urban                 | 35-75                                 | 35-75  | 896         | 970     | Standard                                               |      |
| 181 | China   | 1992       | Sino-MONICA Sichuan                                                                 | Subnational                 | both                  | 25-64                                 | 25-64  | 628         | 536     | Standard                                               |      |
| 182 | China   | 1993       | China Health and Nutrition Study                                                    | National                    | both                  | 18+                                   | 18+    | 3,901       | 4,280   | Standard                                               | 3    |
| 183 | China   | 1993       | Sino-MONICA Anhui                                                                   | Subnational                 | both                  | 25-64                                 | 25-64  | 193         | 195     | Standard                                               |      |
| 184 | China   | 1993       | Sino-MONICA Beijing                                                                 | Subnational                 | both                  | 25-64                                 | 25-64  | 613         | 816     | Standard                                               |      |
| 185 | China   | 1993       | Sino-MONICA Jiangsu                                                                 | Subnational                 | both                  | 25-64                                 | 25-64  | 862         | 365     | Standard                                               |      |
| 186 | China   | 1993       | Sino-MONICA Liaoning                                                                | Subnational                 | both                  | 25-64                                 | 25-64  | 493         | 500     | Standard                                               |      |
| 187 | China   | 1995       | Chinese National Surveys on Students Constitution and Health                        | National                    | both                  | 18-18                                 | 18-18  | 8,562       | 8,392   | Standard                                               |      |
| 188 | China   | 1997       | China Health and Nutrition Study                                                    | National                    | both                  | 18+                                   | 18+    | 4,184       | 4,424   | Standard                                               | 3    |
| 189 | China   | 1997       | INTERMAP, Beijing                                                                   | Community                   | rural                 | 40-59                                 | 40-59  | 133         | 139     | Random-zero                                            |      |
| 190 | China   | 1997       | INTERMAP, Guangxi                                                                   | Community                   | rural                 | 40-59                                 | 40-59  | 140         | 138     | Random-zero                                            |      |
| 191 | China   | 1997       | INTERMAP, Shanxi                                                                    | Community                   | rural                 | 40-59                                 | 40-59  | 143         | 146     | Random-zero                                            |      |
| 192 | China   | 1998       | Guangdong Provincial Diabetic Survey                                                | Subnational                 | rural                 | 25-74                                 | 25-74  | 5,066       | 5,845   | Unknown                                                |      |
| 193 | China   | 1998       | Chinese Longitudinal Healthy Longevity Survey                                       | National                    | both                  | 80+                                   | 80+    | 3,447       | 5,244   | Standard                                               |      |
| 194 | China   | 2000       | Xu et al., Zhonghua Liu Xing Bing Xue Za Zhi 2004; 25: 33-5                         | Community                   | rural                 | 35+                                   | 35+    | 389         | 442     | Unknown                                                |      |
| 195 | China   | 2000       | Jia et al., Obes Rev 2002; 3: 157-65                                                | Community                   | urban                 | 20+                                   | 20+    | 1,106       | 1,670   | Unknown                                                |      |
| 196 | China   | 2000       | Zhang et al., Wei Sheng Yan Jiu 2001; 30: 100-2                                     | Community                   | rural                 | 18-59                                 | 18-59  | 1,259       | 1,647   | Unknown                                                |      |
| 197 | China   | 2000       | China Health and Nutrition Study                                                    | National                    | both                  | 18+                                   | 18+    | 4,527       | 4,937   | Standard                                               | 3    |
| 198 | China   | 2000       | Chinese Longitudinal Healthy Longevity Survey                                       | National                    | both                  | 80+                                   | 80+    | 1,883       | 2,719   | Standard                                               |      |
| 199 | China   | 2000       | Chinese National Surveys on Students Constitution and Health                        | National                    | both                  | 18-18                                 | 18-18  | 8,970       | 9,052   | Standard                                               |      |
| 200 | China   | 2001       | Shi et al., Zhonghua Liu Xing Bing Xue Za Zhi 2003; 24: 547-50                      | Community                   | rural                 | 20+                                   | 20+    | 1,825       | 3,022   | Unknown                                                |      |
| 201 | China   | 2000-2001  | The International Collaborative Study of Cardiovascular Disease in Asia (InterASIA) | National                    | both                  | 35-74                                 | 35-74  | 7,515       | 8,008   | Standard                                               |      |
| 202 | China   | 2002       | Chinese Longitudinal Healthy Longevity Survey                                       | National                    | both                  | 80+                                   | 80+    | 1,082       | 1,460   | Standard                                               |      |
| 203 | China   | 2002       | China National Nutrition and Health Survey                                          | National                    | both                  | 20+                                   | 20+    | 63,471      | 76,623  | Standard                                               |      |
| 204 | China   | 2003       | Fan et al., World J Gastroenterol 2008; 14: 2418-24                                 | Subnational                 | both                  | 25-84                                 | 25-74  | 5,518       | 7,768   | Unknown                                                |      |
| 205 | China   | 2004       | Beijing Child and Adolescent Metabolic Syndrome study                               | Community                   | both                  | 18-18                                 | 18-18  | 256         | 260     | Standard                                               |      |
| 206 | China   | 2004       | China Health and Nutrition Study                                                    | National                    | both                  | 18+                                   | 18+    | 4,402       | 4,802   | Standard                                               | 3    |
| 207 | China   | 2005       | Le et al., BMC Public Health 2007; 7: 72                                            | Subnational                 | rural                 | 45+                                   | 45+    | 2,905       | 3,101   | Unknown                                                |      |
| 208 | China   | 2005       | Pang et al., Intern Med 2008; 47: 893-7                                             | Community                   | rural                 | 35+                                   | 35+    | 22,962      | 22,963  | Unknown                                                |      |
| 209 | China   | 2005       | Chinese Longitudinal Healthy Longevity Survey                                       | National                    | both                  | 80+                                   | 80+    | 405         | 582     | Standard                                               |      |
| 210 | China   | 2005       | Chinese National Surveys on Students Constitution and Health                        | National                    | both                  | 18-18                                 | 18-18  | 10,091      | 10,155  | Standard                                               |      |
| 211 | China   | 2006       | CHEAPS Study; Dong et al., Indian J Med Res 2008; 128: 122-7                        | Subnational                 | rural                 | 35+                                   | 35+    | 22,747      | 23,178  | Unknown                                                |      |
| 212 | China   | 2006       | Beijing Eye Study                                                                   | Community                   | both                  | 45+                                   | 45+    | 1,396       | 1,826   | Standard                                               |      |
| 213 | China   | 2006       | China Health and Nutrition Study                                                    | National                    | both                  | 18+                                   | 18+    | 4,315       | 4,843   | Standard                                               | 3    |
| 214 | China   | 2007       | Beijing Child and Adolescent Metabolic Syndrome study                               | Community                   | urban                 | 18-18                                 | 18-18  | 20          | 18      | Standard                                               |      |
| 215 | China   | 2008-2009  | Chinese Longitudinal Healthy Longevity Survey                                       | National                    | both                  | 65+                                   | 65+    | 6,743       | 8,965   | Standard                                               |      |
| 216 | China   | 2009       | Study in Shenyang/Jinzhou/Anshan, Liaoning                                          | Subnational                 | urban                 | 25-84                                 | 25-84  | 5,757       | 6,877   | Unknown                                                |      |
| 217 | China   | 2009       | Study in Mianning, Sichuan                                                          | Subnational                 | rural                 | 25-64                                 | 25-64  | 522         | 959     | Unknown                                                |      |
| 218 | China   | 2009       | China Health and Nutrition Study                                                    | National                    | both                  | 18+                                   | 18+    | 4,529       | 4,964   | Standard                                               | 3    |
| 219 | China   | 2008-2010  | Fangshan Family-based Ischemic Stroke Study in China (FISSIC) program               | Community                   | rural                 | 40+                                   | 40+    | 20,241      | 37,772  | Standard                                               |      |
| 220 | China   | 2007-2010  | SAGE                                                                                | National                    | both                  | 50+                                   | 50+    | 5,820       | 6,699   | Digital                                                |      |
| 221 | China   | 2010       | China Noncommunicable Disease Surveillance                                          | National                    | both                  | 18+                                   | 18+    | 45,078      | 53,460  | Digital                                                |      |
| 222 | China   | 2010       | Chinese National Surveys on Students Constitution and Health                        | National                    | both                  | 18-18                                 | 18-18  | 8,952       | 8,913   | Standard                                               |      |
| 223 | China   | 2011       | Beijing Eye Study                                                                   | Community                   | both                  | 50+                                   | 50+    | 1,499       | 1,949   | Standard                                               |      |
| 224 | China   | 2011       | China Health and Nutrition Study                                                    | National                    | both                  | 18+                                   | 18+    | 5,892       | 6,654   | Standard                                               | 3    |

|     | Country               | Data years | Survey/Study name/Citation                                                                   | Level of representativeness | Rural, urban, or both | Age range as used for global analysis |        | Sample size |        | Type of blood pressure measurement device <sup>1</sup> | Note |
|-----|-----------------------|------------|----------------------------------------------------------------------------------------------|-----------------------------|-----------------------|---------------------------------------|--------|-------------|--------|--------------------------------------------------------|------|
|     |                       |            |                                                                                              |                             |                       | Male                                  | Female | Male        | Female |                                                        |      |
| 225 | China                 | 2013       | Gobi Desert Children Eye Study                                                               | Community                   | both                  | 18-21                                 | 18-19  | 28          | 25     | Digital                                                |      |
| 226 | China                 | 2012-2013  | The Kailuan Study                                                                            | Community                   | urban                 | 18+                                   | 18+    | 81,496      | 21,590 | Standard                                               |      |
| 227 | China (Hong Kong SAR) | 1985-1986  | Shatin New Town Study                                                                        | Community                   | urban                 | 70+                                   | 70+    | 285         | 698    | Standard                                               |      |
| 228 | China (Hong Kong SAR) | 1991       | The Hong Kong study on Health, health risk and quality of life in the Chinese elderly cohort | Community                   | both                  | 70+                                   | 70+    | 992         | 1,027  | Standard                                               |      |
| 229 | China (Hong Kong SAR) | 1995-1996  | Hong Kong Cardiovascular Risk Factor Prevalence Study 1995-1996                              | National                    | both                  | 25-74                                 | 25-74  | 1,412       | 1,483  | Standard                                               |      |
| 230 | Colombia              | 1986       | INTERSALT                                                                                    | Community                   | rural                 | 20-59                                 | 20-59  | 96          | 95     | Random-zero                                            |      |
| 231 | Colombia              | 2001       | CINDI/CARMEN - Bucaramaga; Bautista et al., Eur J Cardiovasc Prev Rehabil 2006; 13: 769-75   | Community                   | urban                 | 25-64                                 | 25-64  | 623         | 1,227  | Unknown                                                |      |
| 232 | Colombia              | 2002       | CINDI/CARMEN - Bogota; Gomez et al., Boletín Epidemiológico Distrital 2004; 6: 11-29         | Community                   | urban                 | 25-74                                 | 25-74  | 319         | 568    | Unknown                                                |      |
| 233 | Colombia              | 2004-2005  | CArdiovascular Risk factors Multiple Evaluation in Latin America (CARMELA)                   | Community                   | urban                 | 25-64                                 | 25-64  | 738         | 815    | Standard                                               |      |
| 234 | Colombia              | 2007       | Encuesta Nacional de Salud                                                                   | National                    | both                  | 18-69                                 | 18-69  | 5,510       | 7,744  | Digital                                                |      |
| 235 | Colombia              | 2010       | STEPS                                                                                        | Subnational                 | urban                 | 18-64                                 | 18-64  | 881         | 1,188  | Digital                                                |      |
| 236 | Comoros               | 2011       | STEPS                                                                                        | National                    | both                  | 25-64                                 | 25-64  | 1,568       | 3,591  | Digital                                                |      |
| 237 | Congo                 | 2004       | STEPS                                                                                        | Community                   | urban                 | 25-64                                 | 25-64  | 1,014       | 914    | Digital                                                |      |
| 238 | Cook Islands          | 2003       | STEPS                                                                                        | National                    | both                  | 25-64                                 | 25-64  | 925         | 959    | Digital                                                |      |
| 239 | Costa Rica            | 2004       | CAMDI                                                                                        | Community                   | urban                 | 20+                                   | 20+    | 522         | 896    | Digital                                                |      |
| 240 | Costa Rica            | 2004-2006  | Costa Rican Longevity and Healthy Aging Study Pre-1945 Cohort Wave 1                         | National                    | both                  | 60+                                   | 60+    | 1,278       | 1,515  | Digital                                                |      |
| 241 | Costa Rica            | 2006-2008  | Costa Rican Longevity and Healthy Aging Study Pre-1945 Cohort Wave 2                         | National                    | both                  | 62+                                   | 62+    | 1,060       | 1,261  | Digital                                                |      |
| 242 | Costa Rica            | 2009-2010  | Costa Rican Longevity and Healthy Aging Study Pre-1945 Cohort Wave 3                         | National                    | both                  | 64+                                   | 64+    | 808         | 1,008  | Digital                                                |      |
| 243 | Costa Rica            | 2010       | Costa Rican National Cardiovascular Risk Factors Survey                                      | National                    | both                  | 20+                                   | 20+    | 1,016       | 2,618  | Standard                                               |      |
| 244 | Costa Rica            | 2010-2011  | Costa Rican Longevity and Healthy Aging Study 1945-1955 Cohort Wave 1                        | National                    | both                  | 54-66                                 | 54-66  | 1,084       | 1,692  | Digital                                                |      |
| 245 | Costa Rica            | 2012-2014  | Costa Rican Longevity and Healthy Aging Study 1945-1955 Cohort Wave 2                        | National                    | both                  | 56-68                                 | 56-68  | 898         | 1,508  | Digital                                                |      |
| 246 | Cote d'Ivoire         | 2005       | STEPS                                                                                        | National                    | rural                 | 18-64                                 | 18-64  | 848         | 961    | Digital                                                |      |
| 247 | Cote d'Ivoire         | 2005       | STEPS                                                                                        | National                    | urban                 | 18-64                                 | 18-64  | 986         | 1,293  | Digital                                                |      |
| 248 | Croatia               | 2003       | 2003 CAHS - Croatian Health Survey project of the Ministry of Health and Social Welfare      | National                    | both                  | 18+                                   | 18+    | 2,878       | 6,162  | Standard                                               |      |
| 249 | Croatia               | 2003-2004  | School Health Survey                                                                         | National                    | both                  | 18-19                                 | 18-19  | 71          | 21     | Standard                                               |      |
| 250 | Croatia               | 2005       | Endemic Nephropathy and Arterial hypertension (ENAH)                                         | Subnational                 | rural                 | 18+                                   | 18+    | 266         | 401    | Digital                                                |      |
| 251 | Croatia               | 2006-2008  | The Cardiovascular risk factors in school age – intervention model development               | National                    | both                  | 18-20                                 | 18-19  | 190         | 202    | Standard                                               |      |
| 252 | Croatia               | 2008       | Endemic Nephropathy and Arterial hypertension (ENAH)                                         | Subnational                 | rural                 | 18+                                   | 18+    | 263         | 465    | Digital                                                |      |
| 253 | Croatia               | 2010       | Endemic Nephropathy and Arterial hypertension (ENAH)                                         | Subnational                 | rural                 | 18+                                   | 18+    | 258         | 406    | Digital                                                |      |
| 254 | Croatia               | 2015       | Endemic Nephropathy and Arterial hypertension (ENAH) Follow-up Study                         | Subnational                 | rural                 | 20+                                   | 20+    | 225         | 462    | Digital                                                |      |
| 255 | Cuba                  | 1999-2000  | The Survey on Health, Well-Being, and Aging in Latin America and the Caribbean (SABE)        | Community                   | urban                 | 60+                                   | 60+    | 645         | 1,087  | Unknown                                                |      |
| 256 | Cuba                  | 2010       | National Risk Factor Survey                                                                  | National                    | both                  | 15+                                   | 15+    | 3,350       | 3,884  | Standard                                               | 2    |
| 257 | Cuba                  | 2011       | Non communicable disease risk factor in Cienfuegos                                           | Community                   | urban                 | 15-74                                 | 15-74  | 616         | 880    | Standard                                               | 2    |
| 258 | Czech Republic        | 1985       | MONICA                                                                                       | National                    | both                  | 25-64                                 | 25-64  | 1,245       | 1,309  | Standard                                               |      |
| 259 | Czech Republic        | 1988       | MONICA                                                                                       | National                    | both                  | 25-64                                 | 25-64  | 1,357       | 1,411  | Standard                                               |      |
| 260 | Czech Republic        | 1992       | MONICA                                                                                       | National                    | both                  | 25-64                                 | 25-64  | 1,134       | 1,209  | Standard                                               |      |
| 261 | Czech Republic        | 1997-1998  | post-Czech-MONICA                                                                            | National                    | both                  | 25-64                                 | 25-64  | 1,529       | 1,666  | Standard                                               |      |
| 262 | Czech Republic        | 2000-2001  | post-Czech-MONICA                                                                            | National                    | both                  | 25-64                                 | 25-64  | 1,631       | 1,690  | Standard                                               |      |
| 263 | Czech Republic        | 2002-2005  | Health, Alcohol and Psychosocial factors In Eastern Europe                                   | Subnational                 | urban                 | 45-69                                 | 45-69  | 3,240       | 3,888  | Digital                                                |      |
| 264 | Czech Republic        | 2005       | HELEN; Kubinova                                                                              | National                    | both                  | 45-54                                 | 45-54  | 762         | 1,065  | Unknown                                                |      |
| 265 | Czech Republic        | 2007-2008  | post-Czech-MONICA                                                                            | National                    | both                  | 25-64                                 | 25-64  | 1,718       | 1,861  | Standard                                               |      |
| 266 | Denmark               | 1982       | CCHS; Grubman and Mason, Rev Sci Tech 2002; 21: 589-600                                      | Community                   | urban                 | 20+                                   | 20+    | 5,677       | 7,014  | Unknown                                                |      |
| 267 | Denmark               | 1981-1983  | Obesity Research Group-Copenhagen City Heart Study 2                                         | Subnational                 | both                  | 22-62                                 |        | 1,138       |        | Standard                                               |      |
| 268 | Denmark               | 1982-1984  | MONICA, Glostrup                                                                             | Community                   | urban                 | 30-61                                 | 30-61  | 1,940       | 1,845  | Standard                                               |      |
| 269 | Denmark               | 1985       | Jennum et al., Eur J Epidemiol 1996; 12: 285-90                                              | Community                   | urban                 | 70-70                                 | 70-70  | 392         | 412    | Unknown                                                |      |
| 270 | Denmark               | 1985       | INTERSALT                                                                                    | Community                   | urban                 | 20-59                                 | 20-59  | 99          | 100    | Random-zero                                            |      |
| 271 | Denmark               | 1986-1987  | MONICA, Glostrup                                                                             | Community                   | urban                 | 29-61                                 | 29-61  | 747         | 755    | Standard                                               |      |
| 272 | Denmark               | 1991-1992  | MONICA, Glostrup                                                                             | Community                   | urban                 | 29-61                                 | 29-61  | 808         | 816    | Standard                                               |      |
| 273 | Denmark               | 1993       | CCHS; Grubman and Mason, Rev Sci Tech 2002; 21: 589-600                                      | Community                   | urban                 | 20+                                   | 20+    | 4,220       | 5,439  | Unknown                                                |      |
| 274 | Denmark               | 1992-1994  | Obesity Research Group-Copenhagen City Heart Study 3                                         | Subnational                 | both                  | 32-72                                 |        | 922         |        | Standard                                               |      |
| 275 | Denmark               | 1994       | Hansen et al., J Hypertens 2006; 24: 2247-53                                                 | Community                   | urban                 | 41-71                                 | 41-71  | 1,333       | 1,323  | Unknown                                                |      |
| 276 | Denmark               | 1993-1997  | EPIC Aarhus                                                                                  | Community                   | urban                 | 50-65                                 | 50-65  | 8,424       | 8,712  | Digital                                                |      |
| 277 | Denmark               | 1993-1997  | EPIC Copenhagen                                                                              | Community                   | urban                 | 50-65                                 | 50-65  | 18,717      | 21,114 | Digital                                                |      |
| 278 | Denmark               | 1998       | Talleruphuus et al., Blood Press 2006; 15: 347-53                                            | Community                   | both                  | 70-80                                 | 70-80  | 1,336       | 1,410  | Unknown                                                |      |
| 279 | Denmark               | 2006-2008  | The Health2006 Cohort                                                                        | Community                   | urban                 | 18-71                                 | 18-71  | 1,553       | 1,918  | Standard                                               |      |
| 280 | Denmark               | 2007-2008  | The Danish Health Examination Survey                                                         | National                    | both                  | 18+                                   | 18+    | 7,358       | 10,655 | Digital                                                |      |
| 281 | Denmark               | 2009-2010  | The European Youth Heart Study (EYHS)                                                        | Community                   | both                  | 20-28                                 | 20-28  | 305         | 333    | Digital                                                |      |

|     | Country            | Data years | Survey/Study name/Citation                                                 | Level of representativeness | Rural, urban, or both | Age range as used for global analysis |        | Sample size |        | Type of blood pressure measurement device <sup>1</sup> | Note |
|-----|--------------------|------------|----------------------------------------------------------------------------|-----------------------------|-----------------------|---------------------------------------|--------|-------------|--------|--------------------------------------------------------|------|
|     |                    |            |                                                                            |                             |                       | Male                                  | Female | Male        | Female |                                                        |      |
| 282 | Denmark            | 2012-2015  | Danish study of Functional Disorders (DanFunD)                             | Subnational                 | urban                 | 18-72                                 | 18-72  | 3,455       | 4,036  | Standard                                               |      |
| 283 | Dominica           | 2007       | STEPS                                                                      | National                    | both                  | 18-64                                 | 18-64  | 417         | 515    | Digital                                                |      |
| 284 | Dominican Republic | 1993       | Aono et al., J Epidemiol 1997; 7: 238-43                                   | National                    | both                  | 20-69                                 | 20-69  | 737         | 1,149  | Standard                                               |      |
| 285 | Dominican Republic | 1997       | EFRICARD                                                                   | National                    | urban                 | 25-84                                 | 25-84  | 2,042       | 3,964  | Unknown                                                |      |
| 286 | DR Congo           | 1983       | M'Buyamba-Kabangu et al., Am J Epidemiol 1986; 124: 957-68                 | Community                   | urban                 | 20-59                                 | 20-59  | 179         | 223    | Unknown                                                |      |
| 287 | DR Congo           | 2005       | STEPS                                                                      | Community                   | urban                 | 18+                                   | 18+    | 677         | 1,031  | Digital                                                |      |
| 288 | Ecuador            | 2004-2005  | Cardiovascular Risk factors Multiple Evaluation in Latin America (CARMELA) | Community                   | urban                 | 25-64                                 | 25-64  | 813         | 825    | Standard                                               |      |
| 289 | Ecuador            | 2011-2013  | Encuesta Nacional de Salud y Nutricion                                     | National                    | both                  | 18-59                                 | 18-59  | 13,237      | 18,621 | Digital                                                |      |
| 290 | Egypt              | 1991-1993  | The Egyptian National Hyperetension Study                                  | National                    | both                  | 25+                                   | 30+    | 2,930       | 3,317  | Standard                                               |      |
| 291 | Egypt              | 2002       | National Survey of Smoking, Obesity, Blood Pressure and Blood Glucose      | National                    | both                  | 20+                                   | 20+    | 1,958       | 2,519  | Standard                                               |      |
| 292 | Egypt              | 2003-2004  | Marzouk et al., Gut 2007; 56: 1105-10                                      | Community                   | rural                 | 25+                                   | 25+    | 316         | 446    | Standard                                               |      |
| 293 | Egypt              | 2005       | STEPS                                                                      | National                    | both                  | 18-65                                 | 18-65  | 4,255       | 4,022  | Digital                                                |      |
| 294 | Egypt              | 2007-2009  | Mostafa et al., Gut 2010; 59: 1135-40                                      | Community                   | rural                 | 35+                                   | 35+    | 638         | 840    | Digital                                                |      |
| 295 | Egypt              | 2008       | DHS                                                                        | National                    | both                  | 18-59                                 | 18-59  | 4,775       | 5,519  | Digital                                                |      |
| 296 | Egypt              | 2011       | STEPS                                                                      | National                    | both                  | 18-65                                 | 18-65  | 1,674       | 2,875  | Digital                                                |      |
| 297 | Egypt              | 2015       | DHS                                                                        | National                    | both                  | 18-59                                 | 18-59  | 6,644       | 7,801  | Digital                                                |      |
| 298 | El Salvador        | 2004       | CAMDI                                                                      | Community                   | urban                 | 20+                                   | 20+    | 397         | 811    | Digital                                                |      |
| 299 | Eritrea            | 2004       | STEPS                                                                      | National                    | both                  | 18-64                                 | 18-64  | 1,074       | 1,043  | Digital                                                |      |
| 300 | Eritrea            | 2010       | STEPS                                                                      | National                    | both                  | 25-74                                 | 25-74  | 1,713       | 4,290  | Digital                                                |      |
| 301 | Estonia            | 1985       | Abina et al., Blood Press 2003; 12: 111-21                                 | Community                   | urban                 | 20-54                                 | 30-54  | 2,477       | 851    | Unknown                                                |      |
| 302 | Estonia            | 1992       | CINDI                                                                      | Community                   | both                  | 25-64                                 | 25-64  | 1,193       | 862    | Standard                                               |      |
| 303 | Estonia            | 1993       | Abina et al., Blood Press 2003; 12: 111-21                                 | Community                   | urban                 | 20-54                                 | 20-54  | 921         | 678    | Unknown                                                |      |
| 304 | Estonia            | 2000       | Abina et al., Blood Press 2003; 12: 111-21                                 | Community                   | urban                 | 20-54                                 | 20-54  | 635         | 692    | Unknown                                                |      |
| 305 | Estonia            | 2002       | Estonian Biobank                                                           | National                    | both                  | 18-79                                 | 18+    | 89          | 215    | Digital                                                |      |
| 306 | Estonia            | 2003       | Estonian Biobank                                                           | National                    | both                  | 18+                                   | 18+    | 2,686       | 5,668  | Digital                                                |      |
| 307 | Estonia            | 2003       | The European Male Ageing Study (EMAS)                                      | Community                   | both                  | 40+                                   |        | 418         |        | Digital                                                |      |
| 308 | Estonia            | 2004       | Estonian Biobank                                                           | National                    | both                  | 18+                                   | 18+    | 527         | 944    | Digital                                                |      |
| 309 | Estonia            | 2007       | Estonian Biobank                                                           | National                    | both                  | 18+                                   | 18+    | 1,000       | 2,185  | Digital                                                |      |
| 310 | Estonia            | 2008       | Estonian Biobank                                                           | National                    | both                  | 18+                                   | 18+    | 5,148       | 10,967 | Digital                                                |      |
| 311 | Estonia            | 2008       | The European Male Ageing Study (EMAS)                                      | Community                   | both                  | 40+                                   |        | 306         |        | Digital                                                |      |
| 312 | Estonia            | 2009       | Estonian Biobank                                                           | National                    | both                  | 18+                                   | 18+    | 3,963       | 6,489  | Digital                                                |      |
| 313 | Estonia            | 2010       | Estonian Biobank                                                           | National                    | both                  | 18+                                   | 18+    | 4,054       | 7,042  | Digital                                                |      |
| 314 | Estonia            | 2011       | Estonian Biobank                                                           | National                    | both                  | 18+                                   | 18+    | 111         | 174    | Digital                                                |      |
| 315 | Estonia            | 2012       | Estonian Biobank                                                           | National                    | both                  | 18+                                   | 18+    | 89          | 130    | Digital                                                |      |
| 316 | Estonia            | 2013       | Estonian Biobank                                                           | National                    | both                  | 18+                                   | 18+    | 110         | 146    | Digital                                                |      |
| 317 | Ethiopia           | 1983       | Zein and Assefa, Ethiop Med J 1986; 24: 169-78                             | Community                   | rural                 | 15-49                                 | 15-49  | 213         | 209    | Unknown                                                | 2    |
| 318 | Ethiopia           | 2004       | STEPS; Tesfaye et al., Hum Hypertens 2007; 21: 28-37                       | Subnational                 | both                  | 25-64                                 | 25-64  | 1,763       | 2,284  | Unknown                                                |      |
| 319 | Ethiopia           | 2006       | Surveillance of NCD Risk Factors in Addis Ababa (STEPS_Addis2006)          | Subnational                 | urban                 | 25-64                                 | 25-64  | 1,646       | 2,317  | Digital                                                |      |
| 320 | Fiji               | 2002       | STEPS                                                                      | National                    | both                  | 18-64                                 | 18-64  | 2,500       | 3,604  | Digital                                                |      |
| 321 | Fiji               | 2011       | STEPS                                                                      | National                    | both                  | 25-64                                 | 25-64  | 1,118       | 1,413  | Digital                                                |      |
| 322 | Finland            | 1980       | Young Finns Study 1980 rural                                               | National                    | rural                 | 18-18                                 | 18-18  | 121         | 149    | Standard                                               |      |
| 323 | Finland            | 1980       | Young Finns Study 1980 urban                                               | National                    | urban                 | 18-18                                 | 18-18  | 131         | 130    | Standard                                               |      |
| 324 | Finland            | 1982       | MONICA, North Karelia/Kuopio/Turku/Loimaa                                  | Subnational                 | both                  | 25-64                                 | 25-64  | 4,550       | 4,654  | Standard                                               |      |
| 325 | Finland            | 1983       | Young Finns Study 1983 rural                                               | National                    | rural                 | 18-21                                 | 18-21  | 166         | 198    | Standard                                               |      |
| 326 | Finland            | 1983       | Young Finns Study 1983 urban                                               | National                    | urban                 | 18-21                                 | 18-21  | 184         | 204    | Standard                                               |      |
| 327 | Finland            | 1984       | Finnish cohort of the FINE study                                           | Community                   | rural                 | 65-84                                 |        | 716         |        | Standard                                               |      |
| 328 | Finland            | 1985-1986  | INTERSALT, Joensuu                                                         | Community                   | urban                 | 20-59                                 | 20-59  | 100         | 100    | Random-zero                                            |      |
| 329 | Finland            | 1985       | INTERSALT, Turku                                                           | Community                   | urban                 | 20-59                                 | 20-59  | 100         | 100    | Random-zero                                            |      |
| 330 | Finland            | 1986       | Young Finns Study 1986 rural                                               | National                    | rural                 | 18-24                                 | 18-24  | 205         | 236    | Random-zero                                            |      |
| 331 | Finland            | 1986       | Young Finns Study 1986 urban                                               | National                    | urban                 | 18-24                                 | 18-24  | 262         | 331    | Random-zero                                            |      |
| 332 | Finland            | 1987       | Kuusisto et al., Stroke 1994; 25: 1157-64                                  | Community                   | urban                 | 65-74                                 | 65-74  | 470         | 828    | Unknown                                                |      |
| 333 | Finland            | 1984-1989  | Kuopio Ischaemic Heart Disease Risk factor Study                           | Subnational                 | both                  | 42-61                                 |        | 2,628       |        | Standard                                               |      |
| 334 | Finland            | 1987       | MONICA, North Karelia/Kuopio/Turku/Loimaa                                  | Subnational                 | both                  | 25-64                                 | 25-64  | 2,898       | 3,152  | Standard                                               |      |
| 335 | Finland            | 1989       | Helsinki Ageing Study; Lindroos et al., Eur Heart J 1994; 15: 865-70       | Community                   | urban                 | 75-85                                 | 75-85  | 178         | 465    | Unknown                                                |      |
| 336 | Finland            | 1989       | Finnish cohort of the FINE study                                           | Community                   | rural                 | 70-89                                 |        | 462         |        | Standard                                               |      |
| 337 | Finland            | 1990-1992  | Oulu 35 Study                                                              | Community                   | urban                 | 56-56                                 | 56-56  | 231         | 327    | Standard                                               |      |
| 338 | Finland            | 1992       | The National FINRISK Study                                                 | Subnational                 | both                  | 25-64                                 | 25-64  | 2,847       | 3,201  | Standard                                               |      |



|     | Country          | Data years | Survey/Study name/Citation                                                                     | Level of representativeness | Rural, urban, or both | Age range as used for global analysis |        | Sample size |        | Type of blood pressure measurement device <sup>1</sup> | Note |
|-----|------------------|------------|------------------------------------------------------------------------------------------------|-----------------------------|-----------------------|---------------------------------------|--------|-------------|--------|--------------------------------------------------------|------|
|     |                  |            |                                                                                                |                             |                       | Male                                  | Female | Male        | Female |                                                        |      |
| 339 | Finland          | 1991-1993  | Kuopio Ischaemic Heart Disease Risk factor Study                                               | Subnational                 | both                  | 46-65                                 |        | 1,028       |        | Standard                                               |      |
| 340 | Finland          | 1994       | Finnish cohort of the FINE study                                                               | Community                   | rural                 | 75-94                                 |        | 266         |        | Standard                                               |      |
| 341 | Finland          | 1997       | The National FINRISK Study                                                                     | National                    | both                  | 25-74                                 | 25-74  | 4,248       | 4,186  | Standard                                               |      |
| 342 | Finland          | 1996-1998  | Oulu 35 Study                                                                                  | Community                   | urban                 | 60-63                                 | 60-63  | 233         | 338    | Standard                                               |      |
| 343 | Finland          | 1996-1998  | Savitaipale Study, Baseline                                                                    | Community                   | rural                 | 40-66                                 | 40-66  | 573         | 573    | Standard                                               |      |
| 344 | Finland          | 2000       | Finnish cohort of the FINE study                                                               | Community                   | rural                 | 81-96                                 |        | 95          |        | Standard                                               |      |
| 345 | Finland          | 1998-2001  | Kuopio Ischaemic Heart Disease Risk factor Study                                               | Subnational                 | both                  | 53-73                                 | 53-73  | 854         | 920    | Standard                                               |      |
| 346 | Finland          | 2000-2001  | Health 2000 Survey                                                                             | National                    | both                  | 30+                                   | 30+    | 2,871       | 3,463  | Standard                                               |      |
| 347 | Finland          | 2001       | Young Finns Study 2001 rural                                                                   | National                    | rural                 | 24-39                                 | 24-39  | 344         | 391    | Random-zero                                            |      |
| 348 | Finland          | 2001       | Young Finns Study 2001 urban                                                                   | National                    | urban                 | 24-39                                 | 24-39  | 657         | 764    | Random-zero                                            |      |
| 349 | Finland          | 2002       | The National FINRISK Study                                                                     | National                    | both                  | 25-74                                 | 25-74  | 3,267       | 3,814  | Standard                                               |      |
| 350 | Finland          | 2005       | Mantyselka et al., Rheumatology (Oxford) 2008; 47: 1235-8                                      | Community                   | rural                 | 30-65                                 | 30-65  | 230         | 243    | Unknown                                                |      |
| 351 | Finland          | 2007       | The National FINRISK Study                                                                     | National                    | both                  | 25-74                                 | 25-74  | 2,926       | 3,310  | Standard                                               |      |
| 352 | Finland          | 2005-2008  | Kuopio Ischaemic Heart Disease Risk factor Study                                               | Subnational                 | both                  | 60-81                                 | 60-81  | 1,239       | 634    | Standard                                               |      |
| 353 | Finland          | 2007       | Oulu 35 Study                                                                                  | Community                   | urban                 | 72-72                                 | 72-72  | 184         | 272    | Standard                                               |      |
| 354 | Finland          | 2007       | Young Finns Study 2007 rural                                                                   | National                    | rural                 | 30-45                                 | 30-45  | 379         | 438    | Random-zero                                            |      |
| 355 | Finland          | 2007       | Young Finns Study 2007 urban                                                                   | National                    | urban                 | 30-45                                 | 30-45  | 602         | 720    | Random-zero                                            |      |
| 356 | Finland          | 2008       | Control group for Finnish male former elite athletes                                           | National                    | both                  | 61+                                   |        | 207         |        | Standard                                               |      |
| 357 | Finland          | 2007-2008  | Savitaipale Study, Follow-up                                                                   | Community                   | rural                 | 51-75                                 | 51-75  | 433         | 484    | Standard                                               |      |
| 358 | Finland          | 2011       | Young Finns Study 2011 rural                                                                   | National                    | rural                 | 34-49                                 | 34-49  | 364         | 423    | Random-zero                                            |      |
| 359 | Finland          | 2011       | Young Finns Study 2011 urban                                                                   | National                    | urban                 | 34-49                                 | 34-49  | 501         | 634    | Random-zero                                            |      |
| 360 | Finland          | 2012       | The National FINRISK Study                                                                     | National                    | both                  | 25-74                                 | 25-74  | 2,771       | 3,042  | Standard                                               |      |
| 361 | Finland          | 2011-2012  | Health 2011 Survey                                                                             | National                    | both                  | 30+                                   | 30+    | 2,061       | 2,563  | Standard                                               |      |
| 362 | France           | 1985-1987  | MONICA, Strasbourg                                                                             | Subnational                 | both                  | 35-64                                 | 35-64  | 667         | 714    | Standard                                               |      |
| 363 | France           | 1985-1987  | MONICA, Strasbourg                                                                             | Community                   | both                  | 25-34                                 | 25-34  | 65          | 78     | Standard                                               |      |
| 364 | France           | 1985-1987  | MONICA, Toulouse                                                                               | Subnational                 | both                  | 35-64                                 | 35-64  | 678         | 645    | Standard                                               |      |
| 365 | France           | 1986-1989  | MONICA, Lille                                                                                  | Community                   | urban                 | 25-64                                 | 25-64  | 882         | 737    | Standard                                               |      |
| 366 | France           | 1988-1991  | MONICA, Toulouse                                                                               | Subnational                 | both                  | 35-64                                 |        | 586         |        | Random-zero                                            |      |
| 367 | France           | 1994-1996  | MONICA, Toulouse                                                                               | Subnational                 | both                  | 35-64                                 | 35-64  | 609         | 566    | Random-zero                                            |      |
| 368 | France           | 1995-1997  | MONICA, Lille                                                                                  | Community                   | urban                 | 36-67                                 | 36-66  | 598         | 594    | Standard                                               |      |
| 369 | France           | 1995-1997  | MONICA, Strasbourg                                                                             | Subnational                 | both                  | 35-64                                 | 35-64  | 527         | 533    | Digital                                                |      |
| 370 | France           | 1999-2001  | The Three city Study                                                                           | Community                   | urban                 | 65+                                   | 65+    | 3,511       | 5,412  | Digital                                                |      |
| 371 | France           | 2001-2003  | The Three city Study                                                                           | Community                   | urban                 | 66+                                   | 66+    | 3,087       | 4,870  | Digital                                                |      |
| 372 | France           | 2003-2005  | The Three city Study                                                                           | Community                   | urban                 | 68+                                   | 68+    | 2,692       | 4,371  | Digital                                                |      |
| 373 | France           | 2004-2006  | Monitoring National du Risque Artériel; National Monitoring of Arterial Risk (MONA LISA) Lille | Community                   | urban                 | 35-75                                 | 35-75  | 797         | 796    | Digital                                                |      |
| 374 | France           | 2005-2007  | National Monitoring of Arterial Risk (MONA LISA) Bas-Rhin                                      | Subnational                 | both                  | 35-74                                 | 35-74  | 781         | 785    | Digital                                                |      |
| 375 | France           | 2006-2008  | The Three city Study                                                                           | Community                   | urban                 | 72+                                   | 72+    | 800         | 1,295  | Digital                                                |      |
| 376 | France           | 2006-2007  | Etude Nationale Nutrition Santé                                                                | National                    | both                  | 18-74                                 | 18-74  | 792         | 1,330  | Digital                                                |      |
| 377 | France           | 2008-2010  | The Three city Study                                                                           | Community                   | urban                 | 73+                                   | 73+    | 801         | 1,404  | Digital                                                |      |
| 378 | France           | 2010-2012  | The Three city Study                                                                           | Community                   | urban                 | 76+                                   | 76+    | 561         | 993    | Digital                                                |      |
| 379 | France           | 2011-2013  | Enquête Littorale Souffle Air Biologie Environnement (ELISABET) Dunkerque                      | Community                   | urban                 | 40-64                                 | 40-64  | 749         | 798    | Digital                                                |      |
| 380 | France           | 2011-2013  | Enquête Littorale Souffle Air Biologie Environnement (ELISABET) Lille                          | Community                   | urban                 | 40-64                                 | 40-64  | 753         | 850    | Digital                                                |      |
| 381 | French Polynesia | 2010       | STEPS                                                                                          | National                    | both                  | 18-64                                 | 18-64  | 993         | 1,308  | Digital                                                |      |
| 382 | Gabon            | 2009       | STEPS                                                                                          | Community                   | urban                 | 18-64                                 | 18-64  | 1,018       | 1,465  | Digital                                                |      |
| 383 | Gambia           | 1997       | van der Sande et al., Hum Hypertens 2000; 14: 489-96                                           | Community                   | both                  | 25-64                                 | 25-64  | 1,291       | 1,922  | Unknown                                                |      |
| 384 | Gambia           | 1996-1997  | Van der Sande et al., Trop Med Int Health 1997; 2: 1039-48                                     | National                    | both                  | 16+                                   | 16+    | 2,705       | 3,336  | Digital                                                | 2    |
| 385 | Gambia           | 2010       | STEPS                                                                                          | National                    | both                  | 25-64                                 | 25-64  | 1,643       | 1,953  | Digital                                                |      |
| 386 | Georgia          | 1998       | Grim et al., J Hum Hypertens 1999; 13: 243-7                                                   | Community                   | urban                 | 40-69                                 | 40-69  | 92          | 249    | Unknown                                                |      |
| 387 | Georgia          | 2010       | STEPS                                                                                          | National                    | both                  | 18-64                                 | 18-64  | 1,849       | 4,476  | Digital                                                |      |
| 388 | Germany          | 1981       | Hense et al., Int J Epidemiol 1986; 15: 513-8                                                  | Community                   | urban                 | 30-69                                 | 30-69  | 1,032       | 1,163  | Unknown                                                |      |
| 389 | Germany          | 1982       | MBS; Koenig et al., Klin Wochenschr 1986; 64: 1229-36                                          | Community                   | urban                 | 30-69                                 | 30-69  | 861         | 966    | Unknown                                                |      |
| 390 | Germany          | 1982       | MONICA, Erfurt                                                                                 | Community                   | urban                 | 25-64                                 | 25-64  | 106         | 103    | Standard                                               |      |
| 391 | Germany          | 1982-1984  | MONICA, Chemnitz                                                                               | Community                   | urban                 | 25-64                                 | 25-64  | 267         | 294    | Standard                                               |      |
| 392 | Germany          | 1982-1984  | MONICA, Zwickau                                                                                | Community                   | urban                 | 25-64                                 | 25-64  | 247         | 279    | Standard                                               |      |
| 393 | Germany          | 1984       | Herbold et al., Soz Praventivmed 1989; 34: 19-23                                               | Community                   | urban                 | 30-39                                 |        | 298         |        | Unknown                                                |      |
| 394 | Germany          | 1984       | German Cardiovascular Prevention Study (GCP) - National Health Survey 1984                     | Subnational                 | both                  | 25-69                                 | 25-69  | 2,409       | 2,368  | Standard                                               |      |
| 395 | Germany          | 1984-1985  | MONICA, Berlin-Lichtenberg                                                                     | Community                   | urban                 | 25-64                                 | 25-64  | 597         | 639    | Standard                                               |      |

|     | Country | Data years | Survey/Study name/Citation                                                                                                                        | Level of representativeness | Rural, urban, or both | Age range as used for global analysis |        | Sample size |        | Type of blood pressure measurement device <sup>1</sup> | Note |
|-----|---------|------------|---------------------------------------------------------------------------------------------------------------------------------------------------|-----------------------------|-----------------------|---------------------------------------|--------|-------------|--------|--------------------------------------------------------|------|
|     |         |            |                                                                                                                                                   |                             |                       | Male                                  | Female | Male        | Female |                                                        |      |
| 396 | Germany | 1984       | MONICA, Bremen North/West                                                                                                                         | Community                   | urban                 | 25-64                                 | 25-64  | 814         | 853    | Random-zero                                            |      |
| 397 | Germany | 1983-1984  | MONICA, Halle County                                                                                                                              | Subnational                 | urban                 | 25-64                                 | 25-64  | 1,111       | 1,172  | Standard                                               |      |
| 398 | Germany | 1982-1985  | MONICA, Rest of Karl-Marx-Stadt County                                                                                                            | Subnational                 | urban                 | 25-64                                 | 25-64  | 591         | 656    | Standard                                               |      |
| 399 | Germany | 1982-1985  | MONICA, Rest of DDR-MONICA                                                                                                                        | Subnational                 | urban                 | 25-64                                 | 25-64  | 235         | 232    | Standard                                               |      |
| 400 | Germany | 1985-1986  | INTERSALT, Cottbus                                                                                                                                | Community                   | urban                 | 20-59                                 | 20-59  | 99          | 99     | Random-zero                                            |      |
| 401 | Germany | 1985-1986  | INTERSALT, Heidelberg                                                                                                                             | Community                   | urban                 | 20-59                                 | 20-59  | 97          | 99     | Random-zero                                            |      |
| 402 | Germany | 1984-1985  | MONICA, Augsburg                                                                                                                                  | Community                   | both                  | 25-64                                 | 25-64  | 2,017       | 1,991  | Random-zero                                            |      |
| 403 | Germany | 1984-1986  | MONICA, Cottbus County                                                                                                                            | Community                   | urban                 | 25-64                                 | 25-64  | 657         | 739    | Standard                                               |      |
| 404 | Germany | 1983-1987  | MONICA, Rhein-Neckar Region                                                                                                                       | Community                   | urban                 | 25-64                                 | 25-64  | 1,486       | 1,608  | Standard                                               |      |
| 405 | Germany | 1986       | CINDI                                                                                                                                             | Community                   | urban                 | 25-64                                 | 25-64  | 1,878       | 1,990  | Unknown                                                |      |
| 406 | Germany | 1985-1986  | INTERSALT, Bernried                                                                                                                               | Community                   | urban                 | 20-59                                 | 20-59  | 99          | 98     | Random-zero                                            |      |
| 407 | Germany | 1987-1988  | MONICA, Erfurt                                                                                                                                    | Community                   | urban                 | 25-64                                 | 25-64  | 879         | 915    | Standard                                               |      |
| 408 | Germany | 1988       | German Cardiovascular Prevention Study (GCP) - National Health Survey 1988                                                                        | Subnational                 | both                  | 25-69                                 | 25-69  | 2,647       | 2,684  | Standard                                               |      |
| 409 | Germany | 1988       | MONICA, Berlin-Lichtenberg                                                                                                                        | Community                   | urban                 | 25-64                                 | 25-64  | 689         | 727    | Standard                                               |      |
| 410 | Germany | 1988       | MONICA, Bremen North/West                                                                                                                         | Community                   | urban                 | 25-69                                 | 25-69  | 621         | 632    | Random-zero                                            |      |
| 411 | Germany | 1988       | MONICA, Bremen Center/South/East                                                                                                                  | Community                   | urban                 | 25-69                                 | 25-69  | 502         | 582    | Random-zero                                            |      |
| 412 | Germany | 1988       | MONICA, Chemnitz                                                                                                                                  | Community                   | urban                 | 25-64                                 | 25-64  | 288         | 382    | Standard                                               |      |
| 413 | Germany | 1988       | MONICA, Zwickau                                                                                                                                   | Community                   | urban                 | 25-64                                 | 25-64  | 193         | 250    | Standard                                               |      |
| 414 | Germany | 1988-1989  | CINDI                                                                                                                                             | Subnational                 | both                  | 25-64                                 | 25-64  | 1,355       | 1,432  | Standard                                               |      |
| 415 | Germany | 1989-1990  | MONICA, Cottbus County                                                                                                                            | Community                   | urban                 | 25-64                                 | 25-64  | 542         | 529    | Standard                                               |      |
| 416 | Germany | 1988-1989  | MONICA, Halle County                                                                                                                              | Subnational                 | urban                 | 25-64                                 | 25-64  | 963         | 1,202  | Standard                                               |      |
| 417 | Germany | 1988-1989  | MONICA, Rest of Karl-Marx-Stadt County                                                                                                            | Subnational                 | urban                 | 25-64                                 | 25-64  | 543         | 626    | Standard                                               |      |
| 418 | Germany | 1989-1990  | MONICA, Augsburg                                                                                                                                  | Community                   | both                  | 25-64                                 | 25-64  | 1,952       | 1,997  | Random-zero                                            |      |
| 419 | Germany | 1991-1992  | MONICA, Bremen North/West                                                                                                                         | Community                   | urban                 | 25-69                                 | 25-69  | 598         | 672    | Random-zero                                            |      |
| 420 | Germany | 1991-1992  | MONICA, Bremen Center/South/East                                                                                                                  | Community                   | urban                 | 25-69                                 | 25-69  | 524         | 547    | Random-zero                                            |      |
| 421 | Germany | 1991-1992  | CINDI                                                                                                                                             | Subnational                 | both                  | 25-64                                 | 25-64  | 1,338       | 1,430  | Standard                                               |      |
| 422 | Germany | 1991-1992  | German Cardiovascular Prevention Study (GCP) - National Health Survey 1991                                                                        | Subnational                 | both                  | 25-69                                 | 25-69  | 2,622       | 2,686  | Standard                                               |      |
| 423 | Germany | 1991-1992  | First National Examination of life conditions, Environment and Health in East Germany 1991/92                                                     | Subnational                 | both                  | 25-69                                 | 25-69  | 1,051       | 1,160  | Standard                                               |      |
| 424 | Germany | 1991-1992  | MONICA, Erfurt                                                                                                                                    | Community                   | urban                 | 25-64                                 | 25-64  | 588         | 574    | Standard                                               |      |
| 425 | Germany | 1993       | STEPHY I; Trenkwalder et al., J Hypertens 1994; 12: 709-16                                                                                        | Community                   | rural                 | 65+                                   | 65+    | 394         | 588    | Unknown                                                |      |
| 426 | Germany | 1993-1994  | MONICA, Chemnitz                                                                                                                                  | Community                   | urban                 | 25-64                                 | 25-64  | 407         | 426    | Standard                                               |      |
| 427 | Germany | 1993-1994  | MONICA, Zwickau                                                                                                                                   | Community                   | urban                 | 25-64                                 | 25-64  | 139         | 186    | Standard                                               |      |
| 428 | Germany | 1995       | Bobak et al., Int J Epidemiol 1999; 28: 437-44                                                                                                    | Community                   | urban                 | 45-64                                 |        | 501         |        | Unknown                                                |      |
| 429 | Germany | 1994-1995  | MONICA, Augsburg                                                                                                                                  | Community                   | both                  | 25-64                                 | 25-64  | 1,905       | 1,994  | Random-zero                                            |      |
| 430 | Germany | 1994-1998  | EPIC Heidelberg                                                                                                                                   | Community                   | urban                 | 40-64                                 | 35-64  | 4,396       | 5,369  | Digital                                                |      |
| 431 | Germany | 1994-1998  | EPIC Potsdam                                                                                                                                      | Community                   | urban                 | 40-64                                 | 35-64  | 9,541       | 15,239 | Digital                                                |      |
| 432 | Germany | 1997-1999  | German National Health Interview and Examination Survey (GNHIES98)                                                                                | National                    | both                  | 18-79                                 | 18-79  | 3,445       | 3,616  | Standard                                               |      |
| 433 | Germany | 1997-2001  | Study of Health in Pomerania (SHIP-0) baseline study                                                                                              | Subnational                 | both                  | 20-80                                 | 20-80  | 2,112       | 2,187  | Digital                                                |      |
| 434 | Germany | 1999-2001  | KORA S4 Study: Kooperative Research in the Region of Augsburg Survey 4                                                                            | Community                   | both                  | 24-75                                 | 24-75  | 2,082       | 2,161  | Random-zero                                            |      |
| 435 | Germany | 2000-2002  | Epidemiological study of the chances of prevention, early recognition and optimal treatment of chronic diseases in an elderly population (ESTHER) | Subnational                 | both                  | 50-75                                 | 50-75  | 4,315       | 5,306  | Unknown                                                |      |
| 436 | Germany | 2002-2006  | Study of Health in Pomerania (SHIP-1) 5-year follow-up                                                                                            | Subnational                 | both                  | 20-85                                 | 20-85  | 1,584       | 1,707  | Digital                                                |      |
| 437 | Germany | 2006-2008  | KORA F4 Study: Kooperative Research in the Region of Augsburg Follow-Up of Survey 4                                                               | Community                   | both                  | 32-82                                 | 31-82  | 1,482       | 1,591  | Random-zero                                            |      |
| 438 | Germany | 2008-2011  | Epidemiological study of the chances of prevention, early recognition and optimal treatment of chronic diseases in an elderly population (ESTHER) | Subnational                 | both                  | 58-84                                 | 58-84  | 1,297       | 1,443  | Standard                                               |      |
| 439 | Germany | 2008-2011  | German Health Interview and Examination Survey for adults 2008-11 (DEGS1)                                                                         | National                    | both                  | 18-79                                 | 18-79  | 3,405       | 3,665  | Digital                                                |      |
| 440 | Ghana   | 1998       | Amoah et al., Diabetes Res Clin Pract 2002; 56: 197-205                                                                                           | Subnational                 | urban                 | 25+                                   | 25+    | 1,857       | 2,875  | Unknown                                                |      |
| 441 | Ghana   | 2001       | Cappuccio et al., Hypertension 2004; 43: 1017-22                                                                                                  | Community                   | both                  | 40-75                                 | 40-75  | 385         | 628    | Unknown                                                |      |
| 442 | Ghana   | 2006       | STEPS                                                                                                                                             | Community                   | urban                 | 25-69                                 | 25-69  | 887         | 1,698  | Digital                                                |      |
| 443 | Ghana   | 2007-2008  | SAGE                                                                                                                                              | National                    | both                  | 50+                                   | 50+    | 2,215       | 2,034  | Digital                                                |      |
| 444 | Ghana   | 2012       | The Burden and Correlates of Hypertension in Rural Ghana: A Cross-Sectional Study                                                                 | Subnational                 | rural                 | 35+                                   | 35+    | 150         | 271    | Standard                                               |      |
| 445 | Ghana   | 2013       | Silent Crisis: Epidemic Hypertension in Rural West Africa                                                                                         | Subnational                 | rural                 | 35+                                   | 35+    | 151         | 278    | Digital                                                |      |
| 446 | Ghana   | 2012-2014  | Research on Obesity and Diabetes among African Migrants (RODAM), control group                                                                    | Subnational                 | rural                 | 25+                                   | 25+    | 431         | 679    | Digital                                                |      |
| 447 | Ghana   | 2012-2014  | Research on Obesity and Diabetes among African Migrants (RODAM), control group                                                                    | Subnational                 | urban                 | 25-79                                 | 25-79  | 419         | 1,033  | Digital                                                |      |
| 448 | Ghana   | 2014       | DHS                                                                                                                                               | National                    | both                  | 18-59                                 | 18-49  | 3,841       | 7,916  | Digital                                                |      |
| 449 | Greece  | 1986       | Lindholm et al., Eur Heart J 1992; 13: 291-8                                                                                                      | Community                   | rural                 | 45-79                                 | 45-79  | 92          | 111    | Unknown                                                |      |
| 450 | Greece  | 1991-1999  | EPIC                                                                                                                                              | National                    | both                  | 19-86                                 | 20-86  | 11,119      | 15,885 | Standard                                               |      |

|     | Country   | Data years | Survey/Study name/Citation                                                                                                            | Level of representativeness | Rural, urban, or both | Age range as used for global analysis |        | Sample size |        | Type of blood pressure measurement device <sup>1</sup> | Note |
|-----|-----------|------------|---------------------------------------------------------------------------------------------------------------------------------------|-----------------------------|-----------------------|---------------------------------------|--------|-------------|--------|--------------------------------------------------------|------|
|     |           |            |                                                                                                                                       |                             |                       | Male                                  | Female | Male        | Female |                                                        |      |
| 451 | Greece    | 1997       | Stergiou et al., Am J Hypertens 1999; 12: 959-65                                                                                      | Community                   | rural                 | 25+                                   | 25+    | 266         | 362    | Unknown                                                |      |
| 452 | Greece    | 2001       | Karalis et al., BMC Public Health 2007; 7: 351                                                                                        | Community                   | rural                 | 25+                                   | 25+    | 91          | 103    | Unknown                                                |      |
| 453 | Greenland | 2005-2010  | Population Health Survey in Greenland                                                                                                 | National                    | both                  | 18+                                   | 18+    | 1,351       | 1,725  | Digital                                                |      |
| 454 | Grenada   | 2011       | STEPS                                                                                                                                 | National                    | both                  | 25-64                                 | 25-64  | 440         | 645    | Digital                                                |      |
| 455 | Guatemala | 1998       | Stein et al., J Nutr 2002; 132: 2208-14                                                                                               | Community                   | rural                 | 25-44                                 | 25-44  | 488         | 548    | Unknown                                                |      |
| 456 | Guatemala | 1998       | Stein et al., J Nutr 2002; 132: 2208-14                                                                                               | Community                   | urban                 | 25-44                                 | 25-44  | 154         | 230    | Unknown                                                |      |
| 457 | Guatemala | 2001-2002  | CAMDI                                                                                                                                 | Community                   | urban                 | 20+                                   | 20+    | 454         | 940    | Digital                                                |      |
| 458 | Guatemala | 2003-2005  | The Institute of Nutrition of Central America and Panama Nutrition Supplementation Trial Cohort                                       | Community                   | both                  | 25-41                                 | 25-41  | 265         | 304    | Digital                                                |      |
| 459 | Guinea    | 2009       | STEPS                                                                                                                                 | Subnational                 | both                  | 18-64                                 | 18-64  | 1,057       | 1,133  | Digital                                                |      |
| 460 | Honduras  | 2003-2004  | CAMDI                                                                                                                                 | Community                   | urban                 | 20+                                   | 20+    | 437         | 792    | Digital                                                |      |
| 461 | Hungary   | 1982-1984  | MONICA, Budapest                                                                                                                      | Community                   | urban                 | 25-64                                 | 25-64  | 775         | 737    | Standard                                               |      |
| 462 | Hungary   | 1982-1983  | MONICA, Pecs                                                                                                                          | Community                   | urban                 | 25-64                                 | 25-64  | 821         | 861    | Standard                                               |      |
| 463 | Hungary   | 1985       | CINDI                                                                                                                                 | Community                   | urban                 | 25-64                                 | 25-64  | 1,202       | 1,198  | Unknown                                                |      |
| 464 | Hungary   | 1985       | INTERSALT                                                                                                                             | Community                   | rural                 | 20-59                                 | 20-59  | 100         | 100    | Random-zero                                            |      |
| 465 | Hungary   | 1987       | Biro, Acta Cardiol 1990; 45: 3-14                                                                                                     | Community                   | both                  | 18+                                   | 18+    | 308         | 491    | Unknown                                                |      |
| 466 | Hungary   | 1987-1988  | MONICA, Budapest                                                                                                                      | Community                   | urban                 | 25-64                                 | 25-64  | 1,415       | 1,603  | Standard                                               |      |
| 467 | Hungary   | 1987-1988  | MONICA, Pecs                                                                                                                          | Community                   | urban                 | 25-64                                 | 25-64  | 1,584       | 1,519  | Standard                                               |      |
| 468 | Hungary   | 1994-1996  | CINDI                                                                                                                                 | Community                   | urban                 | 25-64                                 | 25-64  | 693         | 1,150  | Standard                                               |      |
| 469 | Hungary   | 2003       | The European Male Ageing Study (EMAS)                                                                                                 | Community                   | both                  | 40+                                   |        | 429         |        | Digital                                                |      |
| 470 | Hungary   | 2008       | The European Male Ageing Study (EMAS)                                                                                                 | Community                   | both                  | 40+                                   |        | 349         |        | Digital                                                |      |
| 471 | Iceland   | 1983       | MONICA, Arnes County                                                                                                                  | Community                   | rural                 | 25-64                                 | 25-64  | 388         | 450    | Standard                                               |      |
| 472 | Iceland   | 1983       | MONICA, Reykjavik                                                                                                                     | Subnational                 | urban                 | 25-64                                 | 25-64  | 435         | 461    | Standard                                               |      |
| 473 | Iceland   | 1985-1986  | INTERSALT                                                                                                                             | Community                   | urban                 | 20-59                                 | 20-59  | 100         | 100    | Random-zero                                            |      |
| 474 | Iceland   | 1988-1989  | MONICA, Arnes County                                                                                                                  | Community                   | rural                 | 25-64                                 | 25-64  | 388         | 442    | Standard                                               |      |
| 475 | Iceland   | 1988-1989  | MONICA, Reykjavik                                                                                                                     | Subnational                 | urban                 | 25-64                                 | 25-64  | 413         | 445    | Standard                                               |      |
| 476 | Iceland   | 1993-1994  | MONICA, Arnes County                                                                                                                  | Community                   | rural                 | 25-64                                 | 25-64  | 422         | 484    | Standard                                               |      |
| 477 | Iceland   | 1993-1994  | MONICA, Reykjavik                                                                                                                     | Subnational                 | urban                 | 25-64                                 | 25-64  | 443         | 449    | Standard                                               |      |
| 478 | Iceland   | 2004       | AGES Reykjavik Study; Mitchell et al., Hypertension 2008; 51: 1123-8                                                                  | Community                   | urban                 | 69+                                   | 69+    | 184         | 224    | Unknown                                                |      |
| 479 | India     | 1986       | INTERSALT                                                                                                                             | Community                   | urban                 | 20-59                                 | 20-59  | 100         | 99     | Random-zero                                            |      |
| 480 | India     | 1988-1989  | Ramachandran et al., Diabetes Res Clin Pract 2002; 58:55-60                                                                           | Community                   | urban                 | 20-74                                 | 20-74  | 455         | 435    | Standard                                               |      |
| 481 | India     | 1990       | Beegom et al., Int J Cardiol 1995; 51: 183-91                                                                                         | Community                   | urban                 | 25-64                                 | 25-64  | 737         | 760    | Unknown                                                |      |
| 482 | India     | 1991-1997  | Mumbai Cohort Study                                                                                                                   | Community                   | urban                 | 35+                                   | 35+    | 88,658      | 59,515 | Standard                                               |      |
| 483 | India     | 1995       | Gupta et al., J Hum Hypertens 2003; 17: 535-40                                                                                        | Community                   | urban                 | 20+                                   | 20+    | 1,406       | 797    | Unknown                                                |      |
| 484 | India     | 1995       | Malhotra et al., J Hum Hypertens 1999; 13: 467-72                                                                                     | Community                   | both                  | 16-70                                 | 16-70  | 1,230       | 1,329  | Unknown                                                | 2    |
| 485 | India     | 1995       | Ramachandran et al., Diabetes Res Clin Pract 1998; 42:181-6                                                                           | Community                   | urban                 | 20-74                                 | 20-74  | 1,061       | 1,093  | Standard                                               |      |
| 486 | India     | 1995-1997  | Aravind Comprehensive Eye Survey                                                                                                      | Community                   | rural                 | 40+                                   | 40+    | 2,200       | 2,672  | Standard                                               |      |
| 487 | India     | 1995-1996  | Epidemiology of blood pressure across cross-cultural populations of Visakhapatnam district, Andhra Pradesh, India                     | Community                   | rural                 | 19-76                                 | 19-76  | 210         | 228    | Standard                                               |      |
| 488 | India     | 1997       | Ramachandran et al., Diabetes Res Clin Pract 1999; 44: 207-13                                                                         | Community                   | rural                 | 20-74                                 | 20-74  | 738         | 879    | Standard                                               |      |
| 489 | India     | 1996-1999  | Chennai Urban Population Study                                                                                                        | Community                   | urban                 | 20+                                   | 20+    | 557         | 705    | Standard                                               |      |
| 490 | India     | 1999       | Swami et al., Public Health 2002; 116: 45-9                                                                                           | Community                   | both                  | 65+                                   | 65+    | 153         | 209    | Unknown                                                |      |
| 491 | India     | 2000       | Barucha and Kuruville, BMC Public Health 2003; 3: 1                                                                                   | Community                   | urban                 | 20+                                   | 20+    | 1,099       | 1,316  | Unknown                                                |      |
| 492 | India     | 2001       | Gupta et al., BMC Cardiovasc Disord 2009; 9: 28                                                                                       | Community                   | urban                 | 15-39                                 | 15-39  | 977         | 1,493  | Unknown                                                | 2    |
| 493 | India     | 1999-2002  | New Delhi Birth Cohort                                                                                                                | Community                   | urban                 | 26-33                                 | 26-33  | 880         | 631    | Digital                                                |      |
| 494 | India     | 2002       | Gupta et al., J Hum Hypertens 2003; 17: 535-40                                                                                        | Community                   | urban                 | 20+                                   | 20+    | 550         | 573    | Unknown                                                |      |
| 495 | India     | 2001-2004  | Chennai Urban Rural Epidemiology Study                                                                                                | Community                   | urban                 | 20+                                   | 20+    | 1,095       | 1,252  | Standard                                               |      |
| 496 | India     | 2002-2003  | Blood Pressure epidemiology in tribal, rural and urban communities of Orissa with special reference to physical and social parameters | Community                   | rural                 | 18-80                                 | 18-80  | 201         | 187    | Standard                                               |      |
| 497 | India     | 2003-2005  | WHO-ICMR NCD risk factor surveillance study                                                                                           | National                    | rural                 | 15-69                                 | 15-69  | 6,432       | 6,842  | Digital                                                | 2    |
| 498 | India     | 2003-2005  | WHO-ICMR NCD risk factor surveillance study                                                                                           | National                    | urban                 | 15-69                                 | 15-69  | 6,553       | 6,727  | Digital                                                | 2    |
| 499 | India     | 2006       | Ramachandran et al., Diabetes Care 2008; 31:893-8                                                                                     | Community                   | both                  | 20+                                   | 20+    | 3,321       | 3,745  | Standard                                               |      |
| 500 | India     | 2005-2006  | Diet and Nutritional status of Rural population and Prevalence of Hypertension                                                        | National                    | rural                 | 20+                                   | 20+    | 11,920      | 13,702 | Standard                                               |      |
| 501 | India     | 2005-2007  | Prevalence of cardiovascular risk factors in rural Tamil Nadu                                                                         | Community                   | rural                 | 25-64                                 | 25-64  | 4,900       | 5,563  | Digital                                                |      |
| 502 | India     | 2007       | Kusuma et al., Asia Pac J Public Health 2009; 21: 497-507                                                                             | Community                   | urban                 | 25-64                                 | 25-64  | 179         | 192    | Unknown                                                |      |
| 503 | India     | 2006-2008  | Central India Eye and Medical Study                                                                                                   | Community                   | rural                 | 30+                                   | 30+    | 2,191       | 2,520  | Digital                                                |      |
| 504 | India     | 2007-2008  | Integrated Disease Surveillance Project Non-communicable Disease Risk Factors Survey                                                  | Subnational                 | both                  | 15-64                                 | 15-64  | 2,719       | 3,499  | Digital                                                | 2    |
| 505 | India     | 2007-2008  | Integrated Disease Surveillance Project Non-communicable Disease Risk Factors Survey                                                  | Subnational                 | both                  | 15-64                                 | 15-64  | 1,720       | 3,136  | Digital                                                | 2    |
| 506 | India     | 2007-2008  | Integrated Disease Surveillance Project Non-communicable Disease Risk Factors Survey                                                  | Subnational                 | both                  | 15-64                                 | 15-64  | 2,857       | 2,996  | Digital                                                | 2    |

|     | Country   | Data years | Survey/Study name/Citation                                                                          | Level of representativeness | Rural, urban, or both | Age range as used for global analysis |        | Sample size |         | Type of blood pressure measurement device <sup>1</sup> | Note |
|-----|-----------|------------|-----------------------------------------------------------------------------------------------------|-----------------------------|-----------------------|---------------------------------------|--------|-------------|---------|--------------------------------------------------------|------|
|     |           |            |                                                                                                     |                             |                       | Male                                  | Female | Male        | Female  |                                                        |      |
| 507 | India     | 2007-2008  | Integrated Disease Surveillance Project Non-communicable Disease Risk Factors Survey                | Subnational                 | both                  | 15-64                                 | 15-64  | 3,084       | 3,007   | Digital                                                | 2    |
| 508 | India     | 2007-2008  | Integrated Disease Surveillance Project Non-communicable Disease Risk Factors Survey                | Subnational                 | both                  | 15-64                                 | 15-64  | 2,282       | 2,185   | Digital                                                | 2    |
| 509 | India     | 2007-2008  | Integrated Disease Surveillance Project Non-communicable Disease Risk Factors Survey                | Subnational                 | both                  | 15-64                                 | 15-64  | 2,060       | 3,017   | Digital                                                | 2    |
| 510 | India     | 2007-2008  | Integrated Disease Surveillance Project Non-communicable Disease Risk Factors Survey                | Subnational                 | both                  | 15-64                                 | 15-64  | 2,144       | 3,283   | Digital                                                | 2    |
| 511 | India     | 2007-2009  | Prevalence of NCD risk factor in people above 15 year in Rural area Nagpur using WHO STEP approach  | Community                   | rural                 | 15+                                   | 15+    | 1,971       | 1,811   | Digital                                                | 2    |
| 512 | India     | 2006-2009  | New Delhi Birth Cohort                                                                              | Community                   | urban                 | 33-38                                 | 33-38  | 650         | 447     | Digital                                                |      |
| 513 | India     | 2007-2008  | SAGE                                                                                                | National                    | both                  | 50+                                   | 50+    | 3,257       | 3,201   | Digital                                                |      |
| 514 | India     | 2008-2010  | ICMR India Diabetes Study                                                                           | National                    | both                  | 20+                                   | 20+    | 6,965       | 7,024   | Digital                                                |      |
| 515 | India     | 2009-2010  | Baseline Survey for the assessment of prevalence of risk factors of NCDs in Gandhinagar District    | Community                   | rural                 | 15-64                                 | 15-64  | 887         | 797     | Digital                                                | 2    |
| 516 | India     | 2009-2010  | Baseline Survey for the assessment of prevalence of risk factors of NCDs in Gandhinagar District    | Community                   | urban                 | 15-64                                 | 15-64  | 898         | 907     | Digital                                                | 2    |
| 517 | India     | 2011-2012  | Diet and Nutritional status of Rural population and Prevalence of Hypertension                      | National                    | rural                 | 18+                                   | 18+    | 22,075      | 27,244  | Digital                                                |      |
| 518 | India     | 2012-2014  | District Level Household and Facility Survey (DLHS) 4                                               | National                    | both                  | 18+                                   | 18+    | 402,994     | 476,021 | Digital                                                |      |
| 519 | India     | 2013-2014  | Annual Health Survey (AHS) - Clinical, Anthropometric & Bio-Chemical (CAB) Component                | Subnational                 | both                  | 18+                                   | 18+    | 84,281      | 99,883  | Digital                                                |      |
| 520 | Indonesia | 1997-1998  | Indonesian Family Life Surveys                                                                      | National                    | both                  | 18+                                   | 18+    | 7,729       | 9,489   | Digital                                                |      |
| 521 | Indonesia | 2001       | STEPS; Ng et al., Bull World Health Organ 2006; 84: 305-13                                          | Community                   | both                  | 15-74                                 | 15-74  | 1,502       | 1,461   | Unknown                                                | 2    |
| 522 | Indonesia | 2001       | STEPS/SURKESNAS                                                                                     | National                    | both                  | 25+                                   | 25+    | 4,686       | 5,345   | Unknown                                                |      |
| 523 | Indonesia | 2000-2001  | Indonesian Family Life Surveys                                                                      | National                    | both                  | 18+                                   | 18+    | 10,609      | 11,505  | Digital                                                |      |
| 524 | Indonesia | 2003       | STEPS; Tesfaye et al., J Hum Hypertens 2007; 21: 28-37                                              | Subnational                 | both                  | 25-64                                 | 25-64  | 984         | 960     | Unknown                                                |      |
| 525 | Indonesia | 2006       | NCD RFS; Soebardi et al., Acta Med Indones 2009; 41: 186-90                                         | Community                   | urban                 | 25-64                                 | 25-64  | 641         | 950     | Unknown                                                |      |
| 526 | Indonesia | 2007-2008  | Indonesian Family Life Surveys                                                                      | National                    | both                  | 18+                                   | 18+    | 12,839      | 14,342  | Digital                                                |      |
| 527 | Indonesia | 2013       | Population Health Basic Health Research 2013 (Riskesmas)                                            | National                    | both                  | 15+                                   | 15+    | 344,856     | 372,158 | Digital                                                | 2    |
| 528 | Iran      | 1990-1991  | National Health Survey I                                                                            | National                    | both                  | 20+                                   | 20+    | 8,233       | 10,976  | Standard                                               |      |
| 529 | Iran      | 1993       | SarrafZadegan and AminiNik, J Hum Hypertens 1997; 11: 425-8                                         | Subnational                 | urban                 | 41-70                                 | 41-70  | 1,712       | 2,362   | Unknown                                                |      |
| 530 | Iran      | 1993       | SarrafZadegan and AminiNik, J Hum Hypertens 1997; 11: 425-8                                         | Subnational                 | rural                 | 41-70                                 | 41-70  | 67          | 115     | Unknown                                                |      |
| 531 | Iran      | 1999-2000  | National Health Survey II                                                                           | National                    | both                  | 20+                                   | 20+    | 12,429      | 15,175  | Standard                                               |      |
| 532 | Iran      | 1999-2001  | Tehran Lipid and Glucose Study                                                                      | Community                   | both                  | 18-80                                 | 18-80  | 6,238       | 6,538   | Standard                                               |      |
| 533 | Iran      | 2001       | Isfahan Healthy Heart Program, Arak rural                                                           | Community                   | rural                 | 19+                                   | 19+    | 1,028       | 1,091   | Standard                                               |      |
| 534 | Iran      | 2001       | Isfahan Healthy Heart Program, Arak urban                                                           | Community                   | urban                 | 19+                                   | 19+    | 2,085       | 2,127   | Standard                                               |      |
| 535 | Iran      | 2001       | Isfahan Healthy Heart Program, Isfahan rural                                                        | Community                   | rural                 | 19+                                   | 19+    | 234         | 239     | Standard                                               |      |
| 536 | Iran      | 2001       | Isfahan Healthy Heart Program, Isfahan urban                                                        | Community                   | urban                 | 19+                                   | 19+    | 1,779       | 1,927   | Standard                                               |      |
| 537 | Iran      | 2001       | Isfahan Healthy Heart Program, Najaf Abad rural                                                     | Community                   | rural                 | 19+                                   | 19+    | 408         | 419     | Standard                                               |      |
| 538 | Iran      | 2001       | Isfahan Healthy Heart Program, Najaf Abad urban                                                     | Community                   | urban                 | 19+                                   | 19-79  | 580         | 576     | Standard                                               |      |
| 539 | Iran      | 2004       | Persian Gulf Healthy Heart Study                                                                    | Subnational                 | urban                 | 25-64                                 | 25-64  | 1,615       | 1,528   | Unknown                                                |      |
| 540 | Iran      | 2003-2004  | Childhood and Adolescence Surveillance and Prevention of Adult Noncommunicable Disease (CASPIAN) R1 | National                    | both                  | 18-18                                 | 18-18  | 60          | 77      | Standard                                               |      |
| 541 | Iran      | 2002-2005  | Tehran Lipid and Glucose Study                                                                      | Community                   | both                  | 18-80                                 | 18-80  | 2,188       | 2,919   | Standard                                               |      |
| 542 | Iran      | 2005       | Provincial Non-Communicable Disease Surveillance Survey                                             | National                    | both                  | 18-64                                 | 18-64  | 38,081      | 37,564  | Digital                                                |      |
| 543 | Iran      | 2004-2008  | Golestan Cohort Study                                                                               | Subnational                 | both                  | 40-79                                 | 40-79  | 21,225      | 28,800  | Standard                                               |      |
| 544 | Iran      | 2006       | Provincial Non-Communicable Disease Surveillance Survey                                             | National                    | both                  | 18-65                                 | 18-65  | 14,180      | 14,029  | Digital                                                |      |
| 545 | Iran      | 2007       | Isfahan Healthy Heart Program, Arak rural                                                           | Community                   | rural                 | 19+                                   | 19+    | 1,030       | 1,028   | Standard                                               |      |
| 546 | Iran      | 2007       | Isfahan Healthy Heart Program, Arak urban                                                           | Community                   | urban                 | 19+                                   | 19+    | 1,429       | 1,366   | Standard                                               |      |
| 547 | Iran      | 2007       | Isfahan Healthy Heart Program, Isfahan rural                                                        | Community                   | rural                 | 19+                                   | 19+    | 157         | 152     | Standard                                               |      |
| 548 | Iran      | 2007       | Isfahan Healthy Heart Program, Isfahan urban                                                        | Community                   | urban                 | 19+                                   | 19+    | 1,340       | 1,339   | Standard                                               |      |
| 549 | Iran      | 2007       | Isfahan Healthy Heart Program, Najaf Abad rural                                                     | Community                   | rural                 | 19-79                                 | 19+    | 255         | 254     | Standard                                               |      |
| 550 | Iran      | 2007       | Isfahan Healthy Heart Program, Najaf Abad urban                                                     | Community                   | urban                 | 19+                                   | 19+    | 495         | 544     | Standard                                               |      |
| 551 | Iran      | 2007       | National Non-Communicable Disease Surveillance Survey                                               | National                    | both                  | 18-64                                 | 18-64  | 2,228       | 2,234   | Digital                                                |      |
| 552 | Iran      | 2007       | Provincial Non-Communicable Disease Surveillance Survey                                             | National                    | both                  | 18-64                                 | 18-64  | 13,859      | 13,826  | Digital                                                |      |
| 553 | Iran      | 2005-2008  | Tehran Lipid and Glucose Study                                                                      | Community                   | both                  | 18-80                                 | 18-80  | 2,496       | 3,269   | Standard                                               |      |
| 554 | Iran      | 2008       | Provincial Non-Communicable Disease Surveillance Survey                                             | National                    | both                  | 18-64                                 | 18-64  | 13,778      | 13,674  | Digital                                                |      |
| 555 | Iran      | 2009       | Provincial Non-Communicable Disease Surveillance Survey                                             | National                    | both                  | 18-64                                 | 18-64  | 13,985      | 13,766  | Digital                                                |      |
| 556 | Iran      | 2009-2010  | Childhood and Adolescence Surveillance and Prevention of Adult Noncommunicable Disease (CASPIAN) R3 | National                    | both                  | 18-18                                 | 18-18  | 484         | 502     | Standard                                               |      |
| 557 | Iran      | 2008-2011  | Tehran Lipid and Glucose Study                                                                      | Community                   | urban                 | 20+                                   | 20+    | 4,714       | 6,025   | Standard                                               |      |
| 558 | Iran      | 2011       | Provincial Non-Communicable Disease Surveillance Survey                                             | National                    | both                  | 18-69                                 | 18-69  | 4,106       | 5,771   | Digital                                                |      |
| 559 | Iran      | 2011-2012  | Childhood and Adolescence Surveillance and Prevention of Adult Noncommunicable Disease (CASPIAN) R4 | National                    | both                  | 18-18                                 | 18-18  | 287         | 270     | Standard                                               |      |
| 560 | Iraq      | 2006       | STEPS                                                                                               | National                    | both                  | 25-64                                 | 25-64  | 1,946       | 2,557   | Standard                                               |      |
| 561 | Ireland   | 1998       | Survey of Lifestyle, Attitudes and Nutritional in Ireland (SLAN)                                    | National                    | both                  | 18+                                   | 18+    | 124         | 296     | Unknown                                                |      |
| 562 | Ireland   | 2002       | Survey of Lifestyle, Attitudes and Nutritional in Ireland (SLAN)                                    | National                    | both                  | 18+                                   | 18+    | 168         | 221     | Unknown                                                |      |
| 563 | Ireland   | 2006-2007  | Survey of Lifestyle, Attitudes and Nutritional in Ireland (SLAN)                                    | National                    | both                  | 45-79                                 | 45-79  | 526         | 679     | Digital                                                |      |

|     | Country | Data years | Survey/Study name/Citation                                               | Level of representativeness | Rural, urban, or both | Age range as used for global analysis |        | Sample size |        | Type of blood pressure measurement device <sup>1</sup> | Note |
|-----|---------|------------|--------------------------------------------------------------------------|-----------------------------|-----------------------|---------------------------------------|--------|-------------|--------|--------------------------------------------------------|------|
|     |         |            |                                                                          |                             |                       | Male                                  | Female | Male        | Female |                                                        |      |
| 564 | Ireland | 2008-2010  | National Adult Nutrition Survey                                          | National                    | both                  | 18+                                   | 18+    | 644         | 671    | Digital                                                |      |
| 565 | Ireland | 2009-2011  | The Irish Longitudinal Study on Ageing                                   | National                    | both                  | 50+                                   | 50+    | 2,696       | 3,173  | Digital                                                |      |
| 566 | Israel  | 1981       | GOH; Gerber et al., Prev Med 2005; 41: 85-91                             | National                    | both                  | 35-69                                 | 35-69  | 1,760       | 1,907  | Unknown                                                |      |
| 567 | Israel  | 1986       | Gofin et al., Eur Heart J 1995; 16: 1988-94                              | Community                   | urban                 | 50-84                                 | 50-84  | 847         | 1,011  | Unknown                                                |      |
| 568 | Israel  | 1985-1986  | MONICA, Tel Aviv                                                         | Community                   | urban                 | 25-64                                 | 25-64  | 390         | 361    | Standard                                               |      |
| 569 | Israel  | 1990-1991  | The Jerusalem Longitudinal Cohort Study                                  | Community                   | urban                 | 69-70                                 | 69-70  | 248         | 205    | Standard                                               |      |
| 570 | Israel  | 1996       | Bobak et al., Int J Epidemiol 1999; 28: 437-44                           | Community                   | urban                 | 45-64                                 |        | 160         |        | Unknown                                                |      |
| 571 | Israel  | 1997-1998  | The Jerusalem Longitudinal Cohort Study                                  | Community                   | urban                 | 76-77                                 | 76-77  | 437         | 436    | Standard                                               |      |
| 572 | Israel  | 1999-2005  | The Israel Glucose Intolerance, Obesity and Hypertention Study           | National                    | urban                 | 58+                                   | 58+    | 513         | 506    | Standard                                               |      |
| 573 | Israel  | 2002-2007  | Hadera District Study                                                    | Subnational                 | urban                 | 25-79                                 | 25-79  | 388         | 377    | Standard                                               |      |
| 574 | Israel  | 2005-2006  | The Jerusalem Longitudinal Cohort Study                                  | Community                   | urban                 | 83-85                                 | 83-85  | 502         | 589    | Digital                                                |      |
| 575 | Israel  | 2005-2006  | Mabat Zahav National Health and Nutrition Survey ages 65 and over 2005-6 | National                    | both                  | 65+                                   | 65+    | 793         | 890    | Digital                                                |      |
| 576 | Italy   | 1981       | [No Authors], Am J Epidemiol 1981; 113: 338-46                           | Subnational                 | both                  | 20-59                                 | 20-59  | 3,189       | 3,510  | Unknown                                                |      |
| 577 | Italy   | 1984       | Laurenzi et al., J Hypertens Suppl 1990; 8: S7-12                        | Community                   | urban                 | 25+                                   | 25+    | 1,473       | 1,721  | Unknown                                                |      |
| 578 | Italy   | 1982-1987  | MONICA, Latina                                                           | Community                   | rural                 | 24-66                                 | 24-66  | 852         | 871    | Standard                                               |      |
| 579 | Italy   | 1985       | Finland, Italy, Netherlands, Elderly (Fine-Italy)                        | Community                   | rural                 | 65-84                                 |        | 680         |        | Standard                                               |      |
| 580 | Italy   | 1985       | INTERSALT, Naples                                                        | Community                   | urban                 | 20-59                                 | 20-59  | 100         | 100    | Random-zero                                            |      |
| 581 | Italy   | 1986       | Vincenzi et al., G Ital Cardiol 1992; 22: 427-40                         | Community                   | urban                 | 35-64                                 | 35-64  | 1,289       | 1,565  | Unknown                                                |      |
| 582 | Italy   | 1986       | INTERSALT, Bassiano                                                      | Community                   | urban                 | 20-59                                 | 20-59  | 99          | 100    | Random-zero                                            |      |
| 583 | Italy   | 1986       | INTERSALT, Gubbio                                                        | Community                   | urban                 | 20-59                                 | 20-59  | 99          | 100    | Random-zero                                            |      |
| 584 | Italy   | 1986       | INTERSALT, Mirano                                                        | Community                   | urban                 | 20-59                                 | 20-59  | 100         | 100    | Random-zero                                            |      |
| 585 | Italy   | 1986       | MONICA, Friuli                                                           | Subnational                 | urban                 | 25-64                                 | 25-64  | 925         | 919    | Standard                                               |      |
| 586 | Italy   | 1986-1987  | MONICA, Brianza                                                          | Subnational                 | urban                 | 25-64                                 | 25-64  | 809         | 830    | Standard                                               |      |
| 587 | Italy   | 1989       | European Fat Study; Seidell et al., Atherosclerosis 1991; 86: 251-60     | Subnational                 | urban                 | 38-38                                 |        | 100         |        | Unknown                                                |      |
| 588 | Italy   | 1989       | MONICA, Friuli                                                           | Subnational                 | urban                 | 25-64                                 | 25-64  | 906         | 906    | Standard                                               |      |
| 589 | Italy   | 1989       | Ventimiglia Heart Study                                                  | Community                   | rural                 | 20+                                   | 20+    | 488         | 593    | Unknown                                                |      |
| 590 | Italy   | 1990       | Bruneck Study                                                            | Community                   | rural                 | 40-79                                 | 40-79  | 469         | 450    | Standard                                               |      |
| 591 | Italy   | 1983-1996  | Malattie cardiovascolari ATerosclerotiche Istituto Superiore di Sanità   | Community                   | rural                 | 18-77                                 | 18-77  | 3,968       | 4,519  | Standard                                               |      |
| 592 | Italy   | 1989-1990  | MONICA, Brianza                                                          | Subnational                 | urban                 | 25-64                                 | 25-64  | 764         | 762    | Standard                                               |      |
| 593 | Italy   | 1991       | Pasini et al., G Ital Cardiol 1999; 29: 891-7                            | Community                   | urban                 | 40-59                                 | 40-59  | 747         | 750    | Unknown                                                |      |
| 594 | Italy   | 1991       | FINEStudy; Bijnen et al., Am J Epidemiol 1996; 143: 553-61; Site 1       | Community                   | rural                 | 69-90                                 |        | 188         |        | Unknown                                                |      |
| 595 | Italy   | 1991       | FINEStudy; Bijnen et al., Am J Epidemiol 1996; 143: 553-61; Site 2       | Community                   | rural                 | 69-90                                 |        | 230         |        | Unknown                                                |      |
| 596 | Italy   | 1992       | PAMELA; Mancia et al., Lancet 1997; 349: 454-7                           | Community                   | urban                 | 25-74                                 | 25-74  | 1,032       | 1,013  | Unknown                                                |      |
| 597 | Italy   | 1992-1993  | Italian Longitudinal Study on Aging                                      | National                    | both                  | 65-84                                 | 65-84  | 1,828       | 1,669  | Standard                                               |      |
| 598 | Italy   | 1994       | MONICA, Friuli                                                           | Subnational                 | urban                 | 25-64                                 | 25-64  | 883         | 888    | Standard                                               |      |
| 599 | Italy   | 1993-1994  | MONICA, Brianza                                                          | Subnational                 | urban                 | 25-64                                 | 25-64  | 796         | 848    | Standard                                               |      |
| 600 | Italy   | 1995       | Vobarno Study; Muiesan et al., Blood Press 2006; 15: 14-9                | Community                   | both                  | 35-64                                 | 35-64  | 265         | 319    | Unknown                                                |      |
| 601 | Italy   | 1995       | Bruneck Study                                                            | Community                   | rural                 | 45-84                                 | 45-84  | 414         | 412    | Standard                                               |      |
| 602 | Italy   | 1996       | CASTEL; Casiglia et al., J Hum Hypertens 2002; 16: 611-20                | Community                   | urban                 | 65+                                   | 65+    | 1,281       | 2,001  | Unknown                                                |      |
| 603 | Italy   | 1993-1998  | EPIC Florence                                                            | Community                   | urban                 | 24-72                                 | 30-72  | 3,326       | 9,485  | Standard                                               |      |
| 604 | Italy   | 1995-1996  | Italian Longitudinal Study on Aging                                      | National                    | both                  | 69-90                                 | 69-90  | 1,091       | 972    | Standard                                               |      |
| 605 | Italy   | 1995-1999  | PROgetto Veneto Anziani                                                  | Subnational                 | both                  | 65+                                   | 65+    | 1,243       | 1,851  | Standard                                               |      |
| 606 | Italy   | 1998       | Olivieri et al., J Clin Endocrinol Metab 2004; 89: 4221-6                | Community                   | both                  | 35-74                                 | 35-74  | 572         | 641    | Unknown                                                |      |
| 607 | Italy   | 1998-1999  | progetto VIP                                                             | Community                   | both                  | 25-74                                 | 25-74  | 598         | 599    | Standard                                               |      |
| 608 | Italy   | 2000       | Muntoni et al., Eur J Intern Med 2009; 20: 373-7                         | Community                   | urban                 | 20+                                   | 20+    | 2,250       | 2,487  | Unknown                                                |      |
| 609 | Italy   | 2000       | Bruneck Study                                                            | Community                   | rural                 | 50-89                                 | 50-89  | 331         | 361    | Standard                                               |      |
| 610 | Italy   | 1998-2002  | Osservatorio Epidemiologico Cardiovascolare                              | National                    | both                  | 35-74                                 | 35-74  | 4,878       | 4,772  | Standard                                               |      |
| 611 | Italy   | 2000-2001  | Italian Longitudinal Study on Aging                                      | National                    | both                  | 73-93                                 | 73-93  | 683         | 671    | Standard                                               |      |
| 612 | Italy   | 2002       | Bo et al., Diab Metab Reseach Rev 2005; 21: 515-24                       | Community                   | both                  | 45-64                                 | 45-64  | 780         | 878    | Unknown                                                |      |
| 613 | Italy   | 2002       | Vobarno Study; Muiesan et al., Hypertens 2010; 28: 1935-43               | Community                   | both                  | 35-74                                 | 35-74  | 169         | 216    | Unknown                                                |      |
| 614 | Italy   | 2001-2003  | The Study of Asti                                                        | Community                   | both                  | 45-64                                 | 45-64  | 780         | 878    | Standard                                               |      |
| 615 | Italy   | 2000-2003  | PROgetto Veneto Anziani                                                  | Subnational                 | both                  | 67+                                   | 67+    | 804         | 1,364  | Standard                                               |      |
| 616 | Italy   | 2003       | The European Male Ageing Study (EMAS)                                    | Community                   | both                  | 40+                                   |        | 433         |        | Digital                                                |      |
| 617 | Italy   | 2004       | Menotti et al., J Hypertens 2009; 27: 266-74                             | Community                   | urban                 | 20-79                                 | 20-79  | 1,761       | 2,055  | Unknown                                                |      |
| 618 | Italy   | 2002-2005  | PROgetto Veneto Anziani                                                  | Subnational                 | both                  | 70+                                   | 70+    | 626         | 1,147  | Standard                                               |      |
| 619 | Italy   | 2005       | Bruneck Study                                                            | Community                   | rural                 | 55-93                                 | 55-93  | 264         | 307    | Standard                                               |      |
| 620 | Italy   | 2004-2005  | Italian Project on the Epidemiology of Alzheimer's disease               | National                    | both                  | 65-84                                 | 65-84  | 1,578       | 1,449  | Standard                                               |      |

|     | Country | Data years | Survey/Study name/Citation                                                         | Level of representativeness | Rural, urban, or both | Age range as used for global analysis |        | Sample size |        | Type of blood pressure measurement device <sup>1</sup> | Note |
|-----|---------|------------|------------------------------------------------------------------------------------|-----------------------------|-----------------------|---------------------------------------|--------|-------------|--------|--------------------------------------------------------|------|
|     |         |            |                                                                                    |                             |                       | Male                                  | Female | Male        | Female |                                                        |      |
| 621 | Italy   | 2004-2005  | Vobarno study                                                                      | Community                   | both                  | 55-74                                 | 55-74  | 99          | 113    | Standard                                               |      |
| 622 | Italy   | 2008       | The European Male Ageing Study (EMAS)                                              | Community                   | both                  | 40+                                   |        | 352         |        | Digital                                                |      |
| 623 | Italy   | 2005-2010  | Moli-sani Study                                                                    | Subnational                 | both                  | 35+                                   | 35+    | 11,699      | 12,617 | Digital                                                |      |
| 624 | Italy   | 2008-2009  | progetto VIP                                                                       | Community                   | both                  | 25-74                                 | 25-74  | 600         | 598    | Standard                                               |      |
| 625 | Italy   | 2010       | Bruneck Study                                                                      | Community                   | rural                 | 60-98                                 | 60-98  | 224         | 256    | Standard                                               |      |
| 626 | Italy   | 2008-2012  | Osservatorio Epidemiologico Cardiovascolare/Health Examination Survey              | National                    | both                  | 35-80                                 | 35-80  | 4,370       | 4,337  | Standard                                               |      |
| 627 | Italy   | 2010-2012  | CArdiovascular risk MEtabolic syndrome LIver and Autoimmunity diseases (CA.ME.LLA) | Community                   | both                  | 18-75                                 | 18-75  | 477         | 515    | Standard                                               |      |
| 628 | Italy   | 2011-2012  | Vobarno study                                                                      | Community                   | both                  | 49-62                                 | 49-62  | 104         | 143    | Standard                                               |      |
| 629 | Jamaica | 2000-2001  | Jamaica Health and Lifestyle Survey                                                | National                    | both                  | 18-74                                 | 18-74  | 611         | 1,240  | Standard                                               |      |
| 630 | Jamaica | 2006-2007  | Jamaica Youth Risk and Resiliency Behaviour Survey 2006                            | National                    | both                  | 18-19                                 | 18-19  | 149         | 185    | Standard                                               |      |
| 631 | Jamaica | 2007-2008  | Jamaica Health and Lifestyle Survey                                                | National                    | both                  | 18-74                                 | 18-74  | 826         | 1,845  | Standard                                               |      |
| 632 | Japan   | 1973       | National Nutrition Survey                                                          | National                    | both                  | 18+                                   | 18+    | 5,791       | 7,306  | Standard                                               | 4    |
| 633 | Japan   | 1975       | National Nutrition Survey                                                          | National                    | both                  | 18+                                   | 18+    | 4,619       | 6,640  | Standard                                               |      |
| 634 | Japan   | 1976       | National Nutrition Survey                                                          | National                    | both                  | 18+                                   | 18+    | 5,555       | 7,824  | Standard                                               |      |
| 635 | Japan   | 1977       | National Nutrition Survey                                                          | National                    | both                  | 18+                                   | 18+    | 4,441       | 6,261  | Standard                                               |      |
| 636 | Japan   | 1978       | National Nutrition Survey                                                          | National                    | both                  | 18+                                   | 18+    | 4,767       | 6,595  | Standard                                               |      |
| 637 | Japan   | 1979       | National Nutrition Survey                                                          | National                    | both                  | 18+                                   | 18+    | 5,056       | 6,927  | Standard                                               |      |
| 638 | Japan   | 1980       | National Nutrition Survey                                                          | National                    | both                  | 18+                                   | 18+    | 5,790       | 7,317  | Standard                                               |      |
| 639 | Japan   | 1980-1983  | Aito Town Study                                                                    | Community                   | rural                 | 20-77                                 | 20-77  | 744         | 973    | Standard                                               |      |
| 640 | Japan   | 1981       | National Nutrition Survey                                                          | National                    | both                  | 18+                                   | 18+    | 4,123       | 6,035  | Standard                                               |      |
| 641 | Japan   | 1982       | National Nutrition Survey                                                          | National                    | both                  | 18+                                   | 18+    | 4,740       | 6,705  | Standard                                               |      |
| 642 | Japan   | 1983       | National Nutrition Survey                                                          | National                    | both                  | 18+                                   | 18+    | 4,567       | 6,540  | Standard                                               |      |
| 643 | Japan   | 1984       | National Nutrition Survey                                                          | National                    | both                  | 18+                                   | 18+    | 4,497       | 6,265  | Standard                                               |      |
| 644 | Japan   | 1985       | INTERSALT, Osaka                                                                   | Community                   | urban                 | 20-59                                 | 20-59  | 100         | 97     | Random-zero                                            |      |
| 645 | Japan   | 1985       | INTERSALT, Tochigi                                                                 | Community                   | urban                 | 20-59                                 | 20-59  | 95          | 99     | Random-zero                                            |      |
| 646 | Japan   | 1985       | INTERSALT, Toyama                                                                  | Community                   | urban                 | 20-59                                 | 20-59  | 100         | 100    | Random-zero                                            |      |
| 647 | Japan   | 1985       | National Nutrition Survey                                                          | National                    | both                  | 18+                                   | 18+    | 4,864       | 6,608  | Standard                                               |      |
| 648 | Japan   | 1985-1986  | Akabane Study                                                                      | Community                   | urban                 | 40-69                                 | 40-69  | 813         | 1,023  | Standard                                               |      |
| 649 | Japan   | 1986       | National Nutrition Survey                                                          | National                    | both                  | 18+                                   | 18+    | 4,952       | 6,575  | Standard                                               |      |
| 650 | Japan   | 1987       | Konan Town Study                                                                   | Community                   | rural                 | 20-79                                 | 20-79  | 70          | 89     | Standard                                               |      |
| 651 | Japan   | 1987       | National Nutrition Survey                                                          | National                    | both                  | 18+                                   | 18+    | 4,083       | 6,092  | Standard                                               |      |
| 652 | Japan   | 1988       | Konan Town Study                                                                   | Community                   | rural                 | 20-79                                 | 20-79  | 76          | 85     | Standard                                               |      |
| 653 | Japan   | 1988       | National Nutrition Survey                                                          | National                    | both                  | 18+                                   | 18+    | 4,150       | 5,833  | Standard                                               |      |
| 654 | Japan   | 1989       | Aito Town Study                                                                    | Community                   | rural                 | 25-74                                 | 25-74  | 530         | 526    | Standard                                               |      |
| 655 | Japan   | 1989       | Konan Town Study                                                                   | Community                   | rural                 | 20-79                                 | 20-79  | 59          | 63     | Standard                                               |      |
| 656 | Japan   | 1988-1990  | Miyama Cohort Study                                                                | Community                   | rural                 | 40-80                                 | 40-80  | 477         | 601    | Standard                                               |      |
| 657 | Japan   | 1989       | National Nutrition Survey                                                          | National                    | both                  | 18+                                   | 18+    | 3,700       | 5,217  | Standard                                               |      |
| 658 | Japan   | 1990       | Konan Town Study                                                                   | Community                   | rural                 | 20-79                                 | 20-79  | 30          | 58     | Standard                                               |      |
| 659 | Japan   | 1990       | National Nutrition Survey                                                          | National                    | both                  | 18+                                   | 18+    | 4,091       | 5,632  | Standard                                               |      |
| 660 | Japan   | 1991       | Konan Town Study                                                                   | Community                   | rural                 | 20-79                                 | 20-79  | 93          | 117    | Standard                                               |      |
| 661 | Japan   | 1991       | Shigaraki Town Study                                                               | Community                   | rural                 | 30-89                                 | 30-89  | 234         | 330    | Standard                                               |      |
| 662 | Japan   | 1991       | National Nutrition Survey                                                          | National                    | both                  | 18+                                   | 18+    | 3,871       | 5,332  | Standard                                               |      |
| 663 | Japan   | 1992       | Konan Town Study                                                                   | Community                   | rural                 | 20-79                                 | 20-79  | 55          | 54     | Standard                                               |      |
| 664 | Japan   | 1992       | Shigaraki Town Study                                                               | Community                   | rural                 | 30-89                                 | 30-89  | 288         | 387    | Standard                                               |      |
| 665 | Japan   | 1992       | National Nutrition Survey                                                          | National                    | both                  | 18+                                   | 18+    | 3,589       | 5,016  | Standard                                               |      |
| 666 | Japan   | 1993       | Konan Town Study                                                                   | Community                   | rural                 | 20-79                                 | 20-79  | 54          | 65     | Standard                                               |      |
| 667 | Japan   | 1993       | Shigaraki Town Study                                                               | Community                   | rural                 | 30-89                                 | 30-89  | 301         | 454    | Standard                                               |      |
| 668 | Japan   | 1993       | National Nutrition Survey                                                          | National                    | both                  | 18+                                   | 18+    | 3,233       | 4,664  | Standard                                               |      |
| 669 | Japan   | 1994       | Konan Town Study                                                                   | Community                   | rural                 | 20-79                                 | 20-79  | 43          | 59     | Standard                                               |      |
| 670 | Japan   | 1994       | Shigaraki Town Study                                                               | Community                   | rural                 | 30-89                                 | 30-89  | 252         | 336    | Standard                                               |      |
| 671 | Japan   | 1994       | National Nutrition Survey                                                          | National                    | both                  | 18+                                   | 18+    | 3,138       | 4,537  | Standard                                               |      |
| 672 | Japan   | 1995       | Konan Town Study                                                                   | Community                   | rural                 | 20-79                                 | 20-79  | 45          | 61     | Standard                                               |      |
| 673 | Japan   | 1995       | Shigaraki Town Study                                                               | Community                   | rural                 | 30-89                                 | 30-89  | 300         | 470    | Standard                                               |      |
| 674 | Japan   | 1995       | National Nutrition Survey                                                          | National                    | both                  | 18+                                   | 18+    | 3,018       | 4,444  | Standard                                               |      |
| 675 | Japan   | 1996       | Shigaraki Town Study                                                               | Community                   | rural                 | 30-79                                 | 30-89  | 86          | 152    | Standard                                               |      |
| 676 | Japan   | 1996       | National Nutrition Survey                                                          | National                    | both                  | 18+                                   | 18+    | 2,954       | 4,281  | Standard                                               |      |
| 677 | Japan   | 1997       | Shigaraki Town Study                                                               | Community                   | rural                 | 30-79                                 | 30-89  | 61          | 100    | Standard                                               |      |

|     | Country    | Data years | Survey/Study name/Citation                                       | Level of representativeness | Rural, urban, or both | Age range as used for global analysis |        | Sample size |           | Type of blood pressure measurement device <sup>1</sup> | Note |
|-----|------------|------------|------------------------------------------------------------------|-----------------------------|-----------------------|---------------------------------------|--------|-------------|-----------|--------------------------------------------------------|------|
|     |            |            |                                                                  |                             |                       | Male                                  | Female | Male        | Female    |                                                        |      |
| 678 | Japan      | 1996-1997  | INTERMAP, AitoTown                                               | Community                   | both                  | 40-59                                 | 40-59  | 130         | 129       | Random-zero                                            |      |
| 679 | Japan      | 1997       | National Nutrition Survey                                        | National                    | both                  | 18+                                   | 18+    | 2,892       | 4,220     | Standard                                               |      |
| 680 | Japan      | 1997-1998  | INTERMAP, Sapporo                                                | Community                   | urban                 | 40-59                                 | 40-59  | 149         | 148       | Random-zero                                            |      |
| 681 | Japan      | 1997-1998  | INTERMAP, Toyama                                                 | Community                   | urban                 | 40-59                                 | 40-59  | 149         | 150       | Random-zero                                            |      |
| 682 | Japan      | 1997-1998  | INTERMAP, Wakayama                                               | Community                   | urban                 | 40-59                                 | 40-59  | 146         | 144       | Random-zero                                            |      |
| 683 | Japan      | 1998       | Niigata Study                                                    | Community                   | urban                 | 70-70                                 | 70-70  | 305         | 294       | Standard                                               |      |
| 684 | Japan      | 1998       | National Nutrition Survey                                        | National                    | both                  | 18+                                   | 18+    | 3,115       | 4,472     | Standard                                               |      |
| 685 | Japan      | 1999       | Niigata Study                                                    | Community                   | urban                 | 71-71                                 | 71-71  | 245         | 217       | Standard                                               |      |
| 686 | Japan      | 1999       | National Nutrition Survey                                        | National                    | both                  | 18+                                   | 18+    | 2,415       | 3,672     | Standard                                               |      |
| 687 | Japan      | 2000       | Niigata Study                                                    | Community                   | urban                 | 72-72                                 | 72-72  | 234         | 201       | Standard                                               |      |
| 688 | Japan      | 2000       | National Nutrition Survey                                        | National                    | both                  | 18+                                   | 18+    | 2,570       | 3,645     | Standard                                               |      |
| 689 | Japan      | 2001       | The Japan Association of Health Service Database                 | Subnational                 | both                  | 20+                                   | 20+    | 1,318,133   | 1,061,237 | Digital                                                |      |
| 690 | Japan      | 2001       | Niigata Study                                                    | Community                   | urban                 | 73-73                                 | 73-73  | 236         | 199       | Standard                                               |      |
| 691 | Japan      | 2001       | National Nutrition Survey                                        | National                    | both                  | 18+                                   | 18+    | 2,327       | 3,616     | Standard                                               |      |
| 692 | Japan      | 2002       | Niigata Study                                                    | Community                   | urban                 | 74-74                                 | 74-74  | 228         | 203       | Standard                                               |      |
| 693 | Japan      | 2002       | National Nutrition Survey                                        | National                    | both                  | 18+                                   | 18+    | 2,280       | 3,358     | Standard                                               |      |
| 694 | Japan      | 2002-2003  | The Hisayama Study                                               | Community                   | rural                 | 40+                                   | 40+    | 1,414       | 1,883     | Digital                                                |      |
| 695 | Japan      | 2003       | National Health and Nutrition Survey                             | National                    | both                  | 18+                                   | 18+    | 2,259       | 3,389     | Standard                                               |      |
| 696 | Japan      | 2003       | Niigata Study                                                    | Community                   | urban                 | 75-75                                 | 75-75  | 216         | 192       | Standard                                               |      |
| 697 | Japan      | 2004       | National Health and Nutrition Survey                             | National                    | both                  | 18+                                   | 18+    | 1,666       | 2,521     | Standard                                               |      |
| 698 | Japan      | 2004       | Niigata Study                                                    | Community                   | urban                 | 76-76                                 | 76-76  | 216         | 188       | Standard                                               |      |
| 699 | Japan      | 2005       | National Health and Nutrition Survey                             | National                    | both                  | 18+                                   | 18+    | 1,666       | 2,427     | Standard                                               |      |
| 700 | Japan      | 2005       | Niigata Study                                                    | Community                   | urban                 | 77-77                                 | 77-77  | 204         | 189       | Standard                                               |      |
| 701 | Japan      | 2006       | National Health and Nutrition Survey                             | National                    | both                  | 18+                                   | 18+    | 1,858       | 2,715     | Standard                                               |      |
| 702 | Japan      | 2006       | Niigata Study                                                    | Community                   | urban                 | 78-78                                 | 78-78  | 200         | 197       | Standard                                               |      |
| 703 | Japan      | 2007       | National Health and Nutrition Survey                             | National                    | both                  | 18+                                   | 18+    | 1,754       | 2,562     | Standard                                               |      |
| 704 | Japan      | 2007       | Niigata Study                                                    | Community                   | urban                 | 79-79                                 | 79-79  | 185         | 194       | Standard                                               |      |
| 705 | Japan      | 2008       | Study of residents in Kanazawa city                              | Community                   | urban                 | 35+                                   | 35+    | 6,562       | 11,944    | Unknown                                                |      |
| 706 | Japan      | 2008       | National Health and Nutrition Survey                             | National                    | both                  | 18+                                   | 18+    | 1,933       | 2,753     | Standard                                               |      |
| 707 | Japan      | 2008       | Niigata Study                                                    | Community                   | urban                 | 80-80                                 | 80-80  | 177         | 180       | Standard                                               |      |
| 708 | Japan      | 2009       | National Health and Nutrition Survey                             | National                    | both                  | 18+                                   | 18+    | 1,820       | 2,664     | Standard                                               |      |
| 709 | Japan      | 2010       | National Health and Nutrition Survey                             | National                    | both                  | 18+                                   | 18+    | 1,711       | 2,416     | Standard                                               |      |
| 710 | Japan      | 2011       | National Health and Nutrition Survey                             | National                    | both                  | 18+                                   | 18+    | 1,597       | 2,266     | Standard                                               |      |
| 711 | Japan      | 2011       | The Tokyo Health Service Association Database                    | Community                   | urban                 | 20+                                   | 20+    | 82,375      | 53,738    | Digital                                                |      |
| 712 | Japan      | 2012       | National Health and Nutrition Survey                             | National                    | both                  | 20+                                   | 20+    | 6,163       | 8,875     | Standard                                               |      |
| 713 | Japan      | 2013       | National Health and Nutrition Survey                             | National                    | both                  | 20+                                   | 20+    | 1,487       | 2,061     | Standard                                               |      |
| 714 | Japan      | 2014       | National Health and Nutrition Survey                             | National                    | both                  | 20+                                   | 20+    | 1,555       | 2,141     | Standard                                               |      |
| 715 | Jordan     | 1995       | Jaddou et al., J Hum Hypertens 2000; 14: 497-501                 | Subnational                 | urban                 | 25+                                   | 25+    | 841         | 1,435     | Unknown                                                |      |
| 716 | Jordan     | 2004       | Behavioural Risk Factor Surveillance Survey                      | National                    | both                  | 18+                                   | 18+    | 237         | 474       | Standard                                               |      |
| 717 | Jordan     | 2007       | Behavioural Risk Factor Surveillance Survey                      | National                    | both                  | 18+                                   | 18+    | 332         | 433       | Standard                                               |      |
| 718 | Jordan     | 2009       | Metabolic abnormalities and vitamin D study                      | National                    | both                  | 18+                                   | 18+    | 1,142       | 3,347     | Standard                                               |      |
| 719 | Kenya      | 1980       | Poulter et al, Trans R Soc Trop Med Hyg 1985; 79: 389-92; Site 1 | Community                   | rural                 | 15-54                                 | 15-54  | 182         | 483       | Unknown                                                | 2    |
| 720 | Kenya      | 1980       | Poulter et al, Trans R Soc Trop Med Hyg 1985; 79: 389-92; Site 2 | Community                   | rural                 | 15-54                                 | 15-54  | 52          | 178       | Unknown                                                | 2    |
| 721 | Kenya      | 1980       | Poulter et al, Trans R Soc Trop Med Hyg 1985; 79: 389-92; Site 3 | Community                   | urban                 | 15-54                                 | 15-54  | 204         | 87        | Unknown                                                | 2    |
| 722 | Kenya      | 1980-1981  | Poulter et al., J Epidemiol Community Health 1984; 38: 181-5     | Community                   | rural                 |                                       | 20+    |             | 597       | Random-zero                                            |      |
| 723 | Kenya      | 1980-1981  | Poulter et al., Hypertension 1984; 6: 810-3                      | Community                   | rural                 | 17+                                   |        | 1,737       |           | Random-zero                                            | 2    |
| 724 | Kenya      | 1985       | INTERSALT                                                        | Community                   | rural                 | 20-59                                 | 20-59  | 90          | 86        | Random-zero                                            |      |
| 725 | Kiribati   | 1981       | Epidemiological survey of Kiribati                               | Subnational                 | rural                 | 20+                                   | 20+    | 474         | 534       | Random-zero                                            |      |
| 726 | Kiribati   | 1981       | Epidemiological survey of Kiribati                               | Subnational                 | urban                 | 20+                                   | 20+    | 939         | 906       | Random-zero                                            |      |
| 727 | Kiribati   | 2004       | STEPS                                                            | National                    | both                  | 18-64                                 | 18-64  | 734         | 900       | Digital                                                |      |
| 728 | Kuwait     | 2006       | STEPS                                                            | National                    | both                  | 20-65                                 | 20-65  | 918         | 1,297     | Standard                                               |      |
| 729 | Kuwait     | 2008-2010  | World Health Survey                                              | National                    | both                  | 18+                                   | 18+    | 1,873       | 1,691     | Digital                                                |      |
| 730 | Kuwait     | 2014       | STEPS                                                            | National                    | both                  | 18-69                                 | 18-69  | 1,380       | 2,216     | Standard                                               |      |
| 731 | Kyrgyzstan | 2012       | DHS                                                              | National                    | both                  | 18-49                                 | 18-49  | 2,122       | 6,559     | Digital                                                |      |
| 732 | Kyrgyzstan | 2013       | STEPS                                                            | National                    | both                  | 25-64                                 | 25-64  | 943         | 1,601     | Digital                                                |      |
| 733 | Lao PDR    | 2008       | STEPS                                                            | Community                   | urban                 | 25-64                                 | 25-64  | 1,657       | 2,446     | Digital                                                |      |
| 734 | Lao PDR    | 2013       | STEPS                                                            | National                    | both                  | 18-64                                 | 18-64  | 989         | 1,470     | Digital                                                |      |

|     | Country                    | Data years | Survey/Study name/Citation                                                            | Level of representativeness | Rural, urban, or both | Age range as used for global analysis |        | Sample size |        | Type of blood pressure measurement device <sup>1</sup> | Note |
|-----|----------------------------|------------|---------------------------------------------------------------------------------------|-----------------------------|-----------------------|---------------------------------------|--------|-------------|--------|--------------------------------------------------------|------|
|     |                            |            |                                                                                       |                             |                       | Male                                  | Female | Male        | Female |                                                        |      |
| 735 | Latvia                     | 2008-2009  | Cardiovascular risk factor study                                                      | National                    | both                  | 25-74                                 | 25-74  | 1,358       | 2,409  | Digital                                                |      |
| 736 | Lebanon                    | 2008-2009  | STEPS                                                                                 | National                    | both                  | 18+                                   | 18+    | 1,319       | 1,480  | Standard                                               |      |
| 737 | Lesotho                    | 2009-2010  | DHS                                                                                   | National                    | both                  | 18-59                                 | 18-49  | 2,665       | 3,160  | Digital                                                |      |
| 738 | Lesotho                    | 2012       | STEPS                                                                                 | National                    | both                  | 25-64                                 | 25-64  | 743         | 1,457  | Digital                                                |      |
| 739 | Lesotho                    | 2014       | DHS                                                                                   | National                    | both                  | 18-59                                 | 18-49  | 2,386       | 2,694  | Digital                                                |      |
| 740 | Liberia                    | 2011       | STEPS                                                                                 | National                    | both                  | 25-64                                 | 25-64  | 1,017       | 1,270  | Digital                                                |      |
| 741 | Libya                      | 1999       | Kadiki and Roacid, Diabetes Metab 2001; 27: 647-54                                    | Community                   | both                  | 25-84                                 | 25-74  | 229         | 378    | Unknown                                                |      |
| 742 | Libya                      | 2009       | STEPS                                                                                 | National                    | both                  | 25-64                                 | 25-64  | 1,684       | 1,569  | Digital                                                |      |
| 743 | Lithuania                  | 1977-1980  | Multifactorial Prevention of Ishaemic Heart Disease, Kaunas                           | Community                   | urban                 | 40-59                                 |        | 5,721       |        | Standard                                               |      |
| 744 | Lithuania                  | 1983       | CINDI                                                                                 | Community                   | both                  | 25-64                                 | 25-64  | 1,823       | 1,955  | Unknown                                                |      |
| 745 | Lithuania                  | 1983-1985  | MONICA, Kaunas                                                                        | Community                   | urban                 | 35-64                                 | 35-64  | 728         | 734    | Standard                                               |      |
| 746 | Lithuania                  | 1987       | Countrywide Integrated Noncommunicable Diseases Intervention Programme survey         | Subnational                 | rural                 | 25-64                                 | 25-64  | 1,227       | 1,445  | Standard                                               |      |
| 747 | Lithuania                  | 1986-1987  | MONICA, Kaunas                                                                        | Community                   | urban                 | 35-64                                 | 35-64  | 894         | 868    | Standard                                               |      |
| 748 | Lithuania                  | 1992-1993  | MONICA, Kaunas                                                                        | Community                   | urban                 | 35-64                                 | 35-64  | 611         | 628    | Standard                                               |      |
| 749 | Lithuania                  | 1992-1993  | Countrywide Integrated Noncommunicable Diseases Intervention Programme survey         | Subnational                 | rural                 | 25-64                                 | 25-64  | 677         | 864    | Standard                                               |      |
| 750 | Lithuania                  | 1998-1999  | Countrywide Integrated Noncommunicable Diseases Intervention Programme survey         | Subnational                 | rural                 | 25-64                                 | 25-64  | 816         | 1,019  | Standard                                               |      |
| 751 | Lithuania                  | 2001-2002  | MONICA4                                                                               | Community                   | urban                 | 35-64                                 | 35-64  | 626         | 775    | Standard                                               |      |
| 752 | Lithuania                  | 2006-2007  | Countrywide Integrated Noncommunicable Diseases Intervention Programme survey         | Subnational                 | rural                 | 25-64                                 | 25-64  | 731         | 982    | Standard                                               |      |
| 753 | Lithuania                  | 2006-2008  | Health, Alcohol and Psychosocial factors In Eastern Europe                            | Community                   | urban                 | 45-75                                 | 45-75  | 3,221       | 3,863  | Digital                                                |      |
| 754 | Luxembourg                 | 2007-2009  | Observation des Risques et de la Santé Cardio-Vasculaire au Luxembourg (ORISCAV-LUX)  | National                    | both                  | 18-69                                 | 18-69  | 657         | 694    | Digital                                                |      |
| 755 | Madagascar                 | 2005       | STEPS                                                                                 | Community                   | urban                 | 25-64                                 | 25-64  | 2,745       | 2,682  | Digital                                                |      |
| 756 | Malawi                     | 2009       | STEPS                                                                                 | National                    | both                  | 25-64                                 | 25-64  | 1,183       | 2,527  | Digital                                                |      |
| 757 | Malaysia                   | 1996       | National Health and Morbidity Survey                                                  | National                    | both                  | 30+                                   | 30+    | 9,990       | 11,379 | Digital                                                |      |
| 758 | Malaysia                   | 2004       | Rampal et al., Public Health 2008; 122: 11-8                                          | National                    | both                  | 15+                                   | 15+    | 7,301       | 9,899  | Standard                                               | 2    |
| 759 | Malaysia                   | 2005       | STEPS                                                                                 | National                    | both                  | 25-64                                 | 25-64  | 1,043       | 1,526  | Standard                                               |      |
| 760 | Malaysia                   | 2006       | The Third National Health and Morbidity Survey (NHMS III)                             | National                    | both                  | 18+                                   | 18+    | 15,205      | 18,770 | Digital                                                |      |
| 761 | Malaysia                   | 2008       | Metabolic Syndrome Study in Malaysia                                                  | National                    | both                  | 18+                                   | 18+    | 1,523       | 2,817  | Digital                                                |      |
| 762 | Malaysia                   | 2011       | National Health and Morbidity Survey (NHMS)                                           | National                    | both                  | 18+                                   | 18+    | 8,228       | 9,443  | Digital                                                |      |
| 763 | Malaysia                   | 2015       | National Health and Morbidity Survey (NHMS)                                           | National                    | both                  | 20+                                   | 18+    | 8,667       | 10,100 | Digital                                                |      |
| 764 | Maldives                   | 2011       | STEPS                                                                                 | National                    | both                  | 18-64                                 | 18-64  | 589         | 1,006  | Digital                                                |      |
| 765 | Mali                       | 2007       | STEPS                                                                                 | Community                   | both                  | 18-64                                 | 18-64  | 954         | 1,356  | Digital                                                |      |
| 766 | Malta                      | 1984       | MONICA, Malta                                                                         | Community                   | urban                 | 25-64                                 | 25-64  | 963         | 939    | Standard                                               |      |
| 767 | Malta                      | 1985       | CINDI                                                                                 | Community                   | both                  | 25-64                                 | 25-64  | 947         | 930    | Standard                                               |      |
| 768 | Malta                      | 1986       | INTERSALT                                                                             | Community                   | rural                 | 20-59                                 | 20-59  | 100         | 100    | Random-zero                                            |      |
| 769 | Marshall Islands           | 2002       | STEPS                                                                                 | National                    | both                  | 18-64                                 | 18-64  | 700         | 1,058  | Digital                                                |      |
| 770 | Mauritius                  | 1987       | Mauritius Noncommunicable Disease Survey                                              | National                    | both                  | 25-74                                 | 25-74  | 2,351       | 2,659  | Standard                                               |      |
| 771 | Mauritius                  | 1992       | Mauritius Noncommunicable Disease Survey                                              | National                    | both                  | 25-74                                 | 25-74  | 2,984       | 3,475  | Standard                                               |      |
| 772 | Mauritius                  | 1998       | Mauritius Noncommunicable Disease Survey                                              | National                    | both                  | 25-74                                 | 25-74  | 2,560       | 3,243  | Standard                                               |      |
| 773 | Mauritius                  | 2009       | Mauritius Noncommunicable Disease Survey                                              | National                    | both                  | 20-79                                 | 20-79  | 2,901       | 3,430  | Digital                                                |      |
| 774 | Mexico                     | 1992       | Yamamoto-Kimura et al., Arch Med Res 1998; 29: 341-9                                  | Community                   | urban                 | 20-90                                 | 20-90  | 72          | 104    | Unknown                                                |      |
| 775 | Mexico                     | 1992-1993  | Encuesta Nacional de Enfermedades Cronicas                                            | National                    | urban                 | 20-69                                 | 20-69  | 6,115       | 8,351  | Standard                                               |      |
| 776 | Mexico                     | 1995       | Guerrero-Romero et al., Salud Publica Mex 1998; 40: 339-46                            | Community                   | rural                 | 20+                                   | 20+    | 1,350       | 4,452  | Unknown                                                |      |
| 777 | Mexico                     | 2000       | Encuesta Nacional de Salud                                                            | National                    | both                  | 20+                                   | 20+    | 13,689      | 28,706 | Standard                                               |      |
| 778 | Mexico                     | 1999-2000  | The Survey on Health, Well-Being, and Aging in Latin America and the Caribbean (SABE) | Community                   | urban                 | 60+                                   | 60+    | 367         | 563    | Unknown                                                |      |
| 779 | Mexico                     | 2002       | Encuesta Nacional Sobre Niveles de vida de los Hogares                                | National                    | both                  | 18+                                   | 18+    | 7,344       | 9,131  | Digital                                                |      |
| 780 | Mexico                     | 2004-2005  | CArdiovascular Risk factors Multiple Evaluation in Latin America (CARMELA)            | Community                   | urban                 | 25-64                                 | 25-64  | 833         | 889    | Standard                                               |      |
| 781 | Mexico                     | 2005       | Encuesta Nacional Sobre Niveles de vida de los Hogares                                | National                    | both                  | 18+                                   | 18+    | 7,542       | 9,106  | Digital                                                |      |
| 782 | Mexico                     | 2006       | Encuesta Nacional de Salud Y Nutricion                                                | National                    | both                  | 20+                                   | 20+    | 13,358      | 20,008 | Standard                                               |      |
| 783 | Mexico                     | 2006       | PREVENIMSS National Coverage Surveys                                                  | Subnational                 | both                  | 20+                                   | 20+    | 8,722       | 11,333 | Standard                                               |      |
| 784 | Mexico                     | 2009-2010  | SAGE                                                                                  | National                    | both                  | 50+                                   | 50+    | 834         | 1,298  | Digital                                                |      |
| 785 | Mexico                     | 2011-2012  | Encuesta Nacional de Salud Y Nutricion                                                | National                    | both                  | 20+                                   | 20+    | 4,563       | 6,629  | Standard                                               |      |
| 786 | Mexico                     | 2012       | The Mexican Health and Aging Study                                                    | National                    | both                  | 50+                                   | 50+    | 803         | 1,126  | Digital                                                |      |
| 787 | Micronesia (Federated Stat | 2002       | STEPS                                                                                 | Subnational                 | both                  | 25-64                                 | 25-64  | 637         | 948    | Digital                                                |      |
| 788 | Micronesia (Federated Stat | 2006       | STEPS                                                                                 | Subnational                 | both                  | 25-64                                 | 25-64  | 635         | 1,164  | Digital                                                |      |
| 789 | Micronesia (Federated Stat | 2008       | STEPS                                                                                 | Subnational                 | both                  | 25-64                                 | 25-64  | 897         | 1,292  | Digital                                                |      |
| 790 | Micronesia (Federated Stat | 2009       | STEPS                                                                                 | Subnational                 | both                  | 20-64                                 | 20-64  | 213         | 429    | Digital                                                |      |
| 791 | Micronesia (Federated Stat | 2009       | STEPS                                                                                 | Subnational                 | both                  | 18-64                                 | 18-64  | 421         | 545    | Digital                                                |      |



|     | Country     | Data years | Survey/Study name/Citation                                                                                                 | Level of representativeness | Rural, urban, or both | Age range as used for global analysis |        | Sample size |        | Type of blood pressure measurement device <sup>1</sup> | Note |
|-----|-------------|------------|----------------------------------------------------------------------------------------------------------------------------|-----------------------------|-----------------------|---------------------------------------|--------|-------------|--------|--------------------------------------------------------|------|
|     |             |            |                                                                                                                            |                             |                       | Male                                  | Female | Male        | Female |                                                        |      |
| 792 | Moldova     | 2013       | STEPS                                                                                                                      | National                    | both                  | 18-69                                 | 18-69  | 1,729       | 2,809  | Digital                                                |      |
| 793 | Mongolia    | 1999       | National Nutrition Survey; Suvd et al., Diabet Med 2002; 19: 502-8                                                         | National                    | both                  | 35+                                   | 35+    | 1,009       | 1,438  | Standard                                               |      |
| 794 | Mongolia    | 2005       | STEPS                                                                                                                      | National                    | both                  | 18-64                                 | 18-64  | 1,508       | 1,586  | Digital                                                |      |
| 795 | Mongolia    | 2009       | STEPS                                                                                                                      | National                    | both                  | 18-64                                 | 18-64  | 2,094       | 2,964  | Digital                                                |      |
| 796 | Mongolia    | 2013       | STEPS                                                                                                                      | National                    | both                  | 18-64                                 | 18-64  | 2,330       | 2,808  | Digital                                                |      |
| 797 | Mozambique  | 2005       | STEPS                                                                                                                      | National                    | both                  | 25-64                                 | 25-64  | 1,280       | 1,687  | Digital                                                |      |
| 798 | Myanmar     | 2003-2004  | STEPS                                                                                                                      | Subnational                 | both                  | 25-74                                 | 25-74  | 1,989       | 2,448  | Digital                                                |      |
| 799 | Namibia     | 2005       | STEPS                                                                                                                      | National                    | both                  | 24-64                                 | 24-64  | 1,403       | 1,795  | Digital                                                |      |
| 800 | Namibia     | 2009       | Okambilimbili Survey                                                                                                       | Community                   | urban                 | 18+                                   | 18+    | 761         | 969    | Digital                                                |      |
| 801 | Namibia     | 2013       | DHS                                                                                                                        | National                    | both                  | 30-64                                 | 30-64  | 1,539       | 2,042  | Digital                                                |      |
| 802 | Nauru       | 1975-1976  | Trends in the prevalence and incidence of non-insulin-dependent diabetes mellitus and impaired glucose tolerance           | Subnational                 | both                  | 18-79                                 | 18-79  | 235         | 241    | Unknown                                                |      |
| 803 | Nauru       | 1982       | Trends in the prevalence and incidence of non-insulin-dependent diabetes mellitus and impaired glucose tolerance           | National                    | both                  | 20+                                   | 20+    | 706         | 780    | Unknown                                                |      |
| 804 | Nauru       | 1987       | Trends in the prevalence and incidence of non-insulin-dependent diabetes mellitus and impaired glucose tolerance           | National                    | both                  | 20+                                   | 20+    | 553         | 665    | Standard                                               |      |
| 805 | Nauru       | 1994       | Trends in the prevalence and incidence of non-insulin-dependent diabetes mellitus and impaired glucose tolerance           | National                    | both                  | 25+                                   | 25+    | 647         | 726    | Standard                                               |      |
| 806 | Nauru       | 2004       | STEPS                                                                                                                      | National                    | both                  | 18-64                                 | 18-64  | 1,014       | 1,077  | Digital                                                |      |
| 807 | Nauru       | 2006       | STEPS                                                                                                                      | National                    | both                  | 18-65                                 | 18-65  | 245         | 231    | Digital                                                |      |
| 808 | Nepal       | 2006-2011  | Early detection and management of Kidney disease, Hypertension, Diabetes and Cardiovascular disease (KHDC Nepal), Tarahara | Community                   | rural                 | 18+                                   | 18+    | 1,176       | 2,351  | Standard                                               |      |
| 809 | Nepal       | 2006-2011  | Early detection and management of Kidney disease, Hypertension, Diabetes and Cardiovascular disease (KHDC Nepal), Damak    | Community                   | urban                 | 18+                                   | 18+    | 1,095       | 1,577  | Standard                                               |      |
| 810 | Nepal       | 2006-2011  | Early detection and management of Kidney disease, Hypertension, Diabetes and Cardiovascular disease (KHDC Nepal), Dharan   | Community                   | urban                 | 18+                                   | 18+    | 4,130       | 6,127  | Standard                                               |      |
| 811 | Nepal       | 2013       | STEPS                                                                                                                      | National                    | both                  | 18-69                                 | 18-69  | 1,276       | 2,703  | Digital                                                |      |
| 812 | Netherlands | 1983       | Van Loo et al., Ned Tijdschr Geneesk 1987; 131: 624-7                                                                      | Community                   | urban                 | 20-49                                 | 20-49  | 2,876       | 3,093  | Unknown                                                |      |
| 813 | Netherlands | 1985       | INTERSALT                                                                                                                  | Community                   | urban                 | 20-59                                 | 20-59  | 100         | 99     | Random-zero                                            |      |
| 814 | Netherlands | 1985       | Zutphen Elderly Study                                                                                                      | Community                   | urban                 | 65-85                                 |        | 886         |        | Random-zero                                            |      |
| 815 | Netherlands | 1986       | European Fat Distribution Study; Seidell et al., Clin Epidemiol 1990; 43: 21-34                                            | Subnational                 | urban                 |                                       | 38-38  |             | 140    | Unknown                                                |      |
| 816 | Netherlands | 1986       | van Poppel et al., Int J Vitam Nutr Res 1989; 59: 381-7                                                                    | Community                   | urban                 | 35-35                                 |        | 60          |        | Unknown                                                |      |
| 817 | Netherlands | 1990       | Zutphen Elderly Study                                                                                                      | Community                   | urban                 | 69-90                                 |        | 554         |        | Random-zero                                            |      |
| 818 | Netherlands | 1989-1993  | the Rotterdam Study, first subcohort                                                                                       | Community                   | urban                 | 55+                                   | 55+    | 2,797       | 4,212  | Random-zero                                            |      |
| 819 | Netherlands | 1993-1995  | the Rotterdam Study, first subcohort                                                                                       | Community                   | urban                 | 56+                                   | 56+    | 2,305       | 3,278  | Random-zero                                            |      |
| 820 | Netherlands | 1993-1997  | EPIC Bilthoven                                                                                                             | Community                   | urban                 | 20-59                                 | 20-59  | 9,662       | 11,653 | Unknown                                                |      |
| 821 | Netherlands | 1993-1997  | EPIC Utrecht                                                                                                               | Community                   | both                  |                                       | 49-70  |             | 16,991 | Digital                                                |      |
| 822 | Netherlands | 1997       | AGHLS; Twisk et al., Int J Sports Med 2002; 23 Suppl 1: S8-14                                                              | Community                   | urban                 | 32-32                                 | 32-32  | 132         | 145    | Unknown                                                |      |
| 823 | Netherlands | 1997-1999  | the Rotterdam Study, first subcohort                                                                                       | Community                   | urban                 | 61+                                   | 61+    | 1,741       | 2,428  | Random-zero                                            |      |
| 824 | Netherlands | 2000       | MPCDRF; Schelleman et al., J Hum Hypertens 2004; 18: 317-24                                                                | Community                   | urban                 | 30-59                                 | 30-59  | 5,004       | 5,816  | Unknown                                                |      |
| 825 | Netherlands | 1998-2001  | Regenboog Project                                                                                                          | National                    | both                  | 18-89                                 | 18-89  | 2,580       | 2,483  | Digital                                                |      |
| 826 | Netherlands | 2000-2001  | the Rotterdam Study, second subcohort                                                                                      | Community                   | urban                 | 55+                                   | 55+    | 1,212       | 1,472  | Random-zero                                            |      |
| 827 | Netherlands | 2002       | Utrecht Health Project; Scheltens et al., J Hum Hypertens 2007; 21: 99-106                                                 | Community                   | urban                 | 20-59                                 | 20-59  | 1,924       | 2,418  | Unknown                                                |      |
| 828 | Netherlands | 2001-2003  | Surinamese in the Netherlands: Study on Ethnicity and Health                                                               | Community                   | urban                 | 35-60                                 | 35-60  | 251         | 257    | Digital                                                |      |
| 829 | Netherlands | 2002-2004  | the Rotterdam Study, first subcohort                                                                                       | Community                   | urban                 | 65+                                   | 65+    | 1,288       | 1,852  | Random-zero                                            |      |
| 830 | Netherlands | 2004-2005  | the Rotterdam Study, second subcohort                                                                                      | Community                   | urban                 | 58+                                   | 58+    | 980         | 1,267  | Random-zero                                            |      |
| 831 | Netherlands | 2006-2008  | the Rotterdam Study, third subcohort                                                                                       | Community                   | urban                 | 45+                                   | 45+    | 1,574       | 2,068  | Digital                                                |      |
| 832 | Netherlands | 2009-2010  | Measuring the Netherlands (NL de Maat)                                                                                     | Subnational                 | both                  | 30-70                                 | 30-70  | 1,779       | 2,019  | Digital                                                |      |
| 833 | Netherlands | 2009-2011  | the Rotterdam Study, first subcohort                                                                                       | Community                   | urban                 | 72+                                   | 72+    | 668         | 960    | Digital                                                |      |
| 834 | Netherlands | 2011-2012  | the Rotterdam Study, second subcohort                                                                                      | Community                   | urban                 | 65+                                   | 65+    | 720         | 913    | Digital                                                |      |
| 835 | Netherlands | 2011-2015  | Healthy Life in an Urban Setting                                                                                           | Community                   | urban                 | 18-71                                 | 18-71  | 2,085       | 2,470  | Digital                                                |      |
| 836 | Netherlands | 2012-2014  | the Rotterdam Study, third subcohort                                                                                       | Community                   | urban                 | 51+                                   | 51+    | 1,254       | 1,635  | Digital                                                |      |
| 837 | New Zealand | 1978       | Simpson et al., N Z Med J 1982; 95: 873-6                                                                                  | Community                   | urban                 | 16+                                   | 16+    | 579         | 612    | Unknown                                                | 2    |
| 838 | New Zealand | 1981       | Simpson et al., N Z Med J 1982; 95: 873-6                                                                                  | Community                   | urban                 | 16+                                   | 16+    | 546         | 590    | Unknown                                                | 2    |
| 839 | New Zealand | 1982       | MONICA, Auckland                                                                                                           | Community                   | urban                 | 35-64                                 | 35-64  | 1,019       | 568    | Random-zero                                            |      |
| 840 | New Zealand | 1989       | LINZ; Nye et al., N Z Med J 1992; 105: 1-3                                                                                 | Subnational                 | both                  | 15-59                                 | 15-59  | 1,110       | 1,301  | Unknown                                                | 2    |
| 841 | New Zealand | 1993-1994  | MONICA, Auckland                                                                                                           | Community                   | urban                 | 35-64                                 | 35-64  | 745         | 726    | Random-zero                                            |      |
| 842 | New Zealand | 2008-2009  | The Adult Nutrition Survey                                                                                                 | National                    | both                  | 15+                                   | 15+    | 1,949       | 2,396  | Digital                                                | 2    |
| 843 | New Zealand | 2012-2013  | 2012/13 New Zealand Health Survey                                                                                          | National                    | both                  | 15+                                   | 15+    | 4,952       | 6,692  | Digital                                                | 2    |
| 844 | Nicaragua   | 2003-2004  | CAMDI                                                                                                                      | Community                   | urban                 | 20+                                   | 20+    | 774         | 916    | Digital                                                |      |
| 845 | Niger       | 1983       | Bretagne et al., Bull Soc Pathol Exot Filiales 1985; 78: 79-88; Site 1                                                     | Community                   | rural                 | 15-34                                 |        | 30          |        | Unknown                                                | 2    |

|     | Country                        | Data years | Survey/Study name/Citation                                                                                                                                | Level of representativeness | Rural, urban, or both | Age range as used for global analysis |        | Sample size |        | Type of blood pressure measurement device <sup>1</sup> | Note |
|-----|--------------------------------|------------|-----------------------------------------------------------------------------------------------------------------------------------------------------------|-----------------------------|-----------------------|---------------------------------------|--------|-------------|--------|--------------------------------------------------------|------|
|     |                                |            |                                                                                                                                                           |                             |                       | Male                                  | Female | Male        | Female |                                                        |      |
| 846 | Niger                          | 1983       | Bretagne et al., Bull Soc Pathol Exot Filiales 1985; 78: 79-88; Site 2                                                                                    | Community                   | rural                 | 15-34                                 |        | 32          |        | Unknown                                                | 2    |
| 847 | Niger                          | 2007       | STEPS                                                                                                                                                     | National                    | both                  | 18-64                                 | 18-64  | 1,372       | 1,140  | Digital                                                |      |
| 848 | Nigeria                        | 1990       | Non-communicable Diseases National Survey                                                                                                                 | National                    | both                  | 15-99                                 | 15-99  | 8,359       | 7,655  | Unknown                                                | 2    |
| 849 | Nigeria                        | 1995       | Okesina et al., East Afr Med J 1999; 76: 212-6                                                                                                            | Community                   | rural                 | 21-50                                 | 21-50  | 106         | 205    | Unknown                                                |      |
| 850 | Nigeria                        | 2007       | Ibadan Study of Ageing                                                                                                                                    | Subnational                 | both                  | 60+                                   | 60+    | 670         | 928    | Digital                                                |      |
| 851 | Nigeria                        | 2008       | Ibadan Study of Ageing                                                                                                                                    | Subnational                 | both                  | 61+                                   | 61+    | 475         | 659    | Digital                                                |      |
| 852 | Nigeria                        | 2009       | Ibadan Study of Ageing                                                                                                                                    | Subnational                 | both                  | 62+                                   | 62+    | 445         | 615    | Digital                                                |      |
| 853 | Nigeria                        | 2009       | Community Health Plan - Kwara Central Survey                                                                                                              | Community                   | rural                 | 18+                                   | 18+    | 1,251       | 1,437  | Digital                                                |      |
| 854 | Nigeria                        | 2011       | Community Health Plan - Kwara Central Survey                                                                                                              | Community                   | rural                 | 18+                                   | 18+    | 399         | 504    | Digital                                                |      |
| 855 | Nigeria                        | 2013       | Community Health Plan - Kwara Central Survey                                                                                                              | Community                   | rural                 | 18+                                   | 18+    | 359         | 428    | Digital                                                |      |
| 856 | Niue                           | 2011       | STEPS                                                                                                                                                     | National                    | both                  | 18-100                                | 18-100 | 379         | 455    | Digital                                                |      |
| 857 | North Korea                    | 2005       | STEPS                                                                                                                                                     | Community                   | urban                 | 25-64                                 | 25-64  | 1,044       | 1,081  | Digital                                                |      |
| 858 | North Korea                    | 2007       | STEPS                                                                                                                                                     | Community                   | rural                 | 25-64                                 | 25-64  | 1,155       | 1,176  | Digital                                                |      |
| 859 | North Korea                    | 2008       | STEPS                                                                                                                                                     | Subnational                 | both                  | 25-64                                 | 25-64  | 2,818       | 2,924  | Digital                                                |      |
| 860 | Norway                         | 1980       | Norwegian Counties Study; Graff-Iversen et al., Heart 2008; 94: 482-6                                                                                     | Community                   | rural                 | 40-49                                 | 40-49  | 16,616      | 16,265 | Unknown                                                |      |
| 861 | Norway                         | 1979-1980  | The Tromsø Study; Tromsø 2                                                                                                                                | Community                   | both                  | 20-54                                 | 20-49  | 8,448       | 7,887  | Standard                                               |      |
| 862 | Norway                         | 1984-1986  | HUNT1 Study                                                                                                                                               | Subnational                 | rural                 | 20+                                   | 20+    | 36,655      | 38,145 | Standard                                               |      |
| 863 | Norway                         | 1987       | Oslo Risk Factor Screening Program; Jennum et al., Int J Epidemiol 2001; 30 Suppl 1: S59-65                                                               | Community                   | urban                 | 40-40                                 | 40-40  | 9,100       | 9,100  | Unknown                                                |      |
| 864 | Norway                         | 1986-1987  | The Tromsø Study; Tromsø 3                                                                                                                                | Community                   | both                  | 20-61                                 | 20-56  | 10,372      | 9,820  | Digital                                                |      |
| 865 | Norway                         | 1994-1995  | The Tromsø Study; Tromsø 4                                                                                                                                | Community                   | both                  | 25+                                   | 25+    | 12,775      | 13,864 | Digital                                                |      |
| 866 | Norway                         | 1995-1997  | HUNT2 study                                                                                                                                               | Subnational                 | rural                 | 20+                                   | 20+    | 30,297      | 33,836 | Digital                                                |      |
| 867 | Norway                         | 1995-1997  | Young-HUNT1 Study                                                                                                                                         | Subnational                 | rural                 | 20-21                                 | 20-21  | 9           | 12     | Digital                                                |      |
| 868 | Norway                         | 1998       | HUSK; Brekke et al., BMC Geriatr 2006; 6: 16                                                                                                              | Community                   | urban                 | 70-74                                 | 70-74  | 1,473       | 1,886  | Unknown                                                |      |
| 869 | Norway                         | 2000-2003  | the Oslo cohort (HUBBRO), the Oppland and Hedmark cohort (OPPHED), and the Troms and Finnmark cohort (TROFINN) of COHORT NORWAY                           | Subnational                 | both                  | 30-76                                 | 30-76  | 16,888      | 20,660 | Digital                                                |      |
| 870 | Norway                         | 2001-2002  | The Tromsø Study; Tromsø 5, Tromsø Study Panel                                                                                                            | Community                   | both                  | 30-89                                 | 30-89  | 2,542       | 3,594  | Digital                                                |      |
| 871 | Norway                         | 2006-2008  | HUNT3 Study                                                                                                                                               | Subnational                 | rural                 | 20+                                   | 20+    | 20,021      | 24,072 | Digital                                                |      |
| 872 | Norway                         | 2006-2008  | Young-HUNT3 Study                                                                                                                                         | Subnational                 | rural                 | 20-21                                 | 20-21  | 14          | 8      | Digital                                                |      |
| 873 | Norway                         | 2007-2008  | The Tromsø Study; Tromsø 6                                                                                                                                | Community                   | both                  | 30-87                                 | 30-87  | 6,014       | 6,868  | Digital                                                |      |
| 874 | Occupied Palestinian Territory | 1996-1998  | Abdul-Rahim et al., Diabetes Care 2001; 24: 275-9                                                                                                         | Community                   | rural                 | 30-64                                 | 18-64  | 206         | 443    | Standard                                               |      |
| 875 | Occupied Palestinian Territory | 1996-1998  | Abdul-Rahim et al., Diabetes Care 2001; 24: 275-9                                                                                                         | Community                   | urban                 | 30-64                                 | 18-64  | 182         | 458    | Standard                                               |      |
| 876 | Occupied Palestinian Territory | 1999-2000  | The First National Health and Nutrition Survey                                                                                                            | National                    | both                  | 20-59                                 | 20-59  | 1,600       | 1,704  | Random-zero                                            |      |
| 877 | Occupied Palestinian Territory | 2010       | STEPS                                                                                                                                                     | National                    | both                  | 20-64                                 | 20-64  | 1,847       | 3,401  | Digital                                                |      |
| 878 | Oman                           | 2000       | Al-Riyami and Afifi, Saudi Med J 2003; 24: 641-6                                                                                                          | National                    | both                  | 20-59                                 | 20-59  | 3,075       | 3,125  | Unknown                                                |      |
| 879 | Oman                           | 2006       | STEPS                                                                                                                                                     | Community                   | urban                 | 20-59                                 | 20-59  | 540         | 732    | Digital                                                |      |
| 880 | Oman                           | 2008       | The Oman World Health Survey                                                                                                                              | National                    | both                  | 18+                                   | 18+    | 2,275       | 2,343  | Digital                                                |      |
| 881 | Pakistan                       | 1990-1994  | National Health Survey Of Pakistan 1990-1994                                                                                                              | National                    | both                  | 18+                                   | 18+    | 3,936       | 4,489  | Standard                                               |      |
| 882 | Pakistan                       | 1995       | Shah et al., J Hum Hypertens 2001; 15: 107-12                                                                                                             | Community                   | rural                 | 18-59                                 | 18-59  | 1,112       | 2,529  | Unknown                                                |      |
| 883 | Pakistan                       | 2004       | COBRA-1                                                                                                                                                   | Community                   | urban                 | 40+                                   | 40+    | 1,502       | 1,639  | Unknown                                                |      |
| 884 | Pakistan                       | 2005       | STEPS                                                                                                                                                     | National                    | both                  | 25-65                                 | 25-65  | 800         | 1,100  | Digital                                                |      |
| 885 | Pakistan                       | 2014       | STEPS                                                                                                                                                     | Subnational                 | both                  | 18-69                                 | 18-69  | 2,989       | 3,703  | Digital                                                |      |
| 886 | Palau                          | 2013       | STEPS                                                                                                                                                     | National                    | both                  | 25-64                                 | 25-64  | 1,046       | 1,133  | Digital                                                |      |
| 887 | Panama                         | 2010-2011  | Prevalencia de factores de riesgo asociados a enfermedad cardiovascular 2010-2011                                                                         | Subnational                 | both                  | 18+                                   | 18+    | 1,073       | 2,474  | Digital                                                |      |
| 888 | Papua New Guinea               | 1983       | King et al., J Epidemiol Community Health 1985; 39: 215-9; Site 1                                                                                         | Community                   | rural                 | 20-44                                 | 20-44  | 59          | 58     | Unknown                                                |      |
| 889 | Papua New Guinea               | 1983       | King et al., J Epidemiol Community Health 1985; 39: 215-9; Site 2                                                                                         | Community                   | rural                 | 20-44                                 | 20-44  | 23          | 49     | Unknown                                                |      |
| 890 | Papua New Guinea               | 1986       | King et al., P N G Med J 1994; 37: 100-9; Site 1                                                                                                          | Community                   | rural                 | 20-54                                 | 20-54  | 75          | 76     | Unknown                                                |      |
| 891 | Papua New Guinea               | 1986       | King et al., P N G Med J 1994; 37: 100-9; Site 2                                                                                                          | Community                   | rural                 | 20-54                                 | 20-54  | 100         | 118    | Unknown                                                |      |
| 892 | Papua New Guinea               | 1986       | King et al., P N G Med J 1994; 37: 100-9; Site 3                                                                                                          | Community                   | rural                 | 20-54                                 | 20-54  | 66          | 91     | Unknown                                                |      |
| 893 | Papua New Guinea               | 1986       | King et al., P N G Med J 1994; 37: 100-9; Site 4                                                                                                          | Community                   | rural                 | 20-54                                 | 20-54  | 106         | 115    | Unknown                                                |      |
| 894 | Papua New Guinea               | 1986       | King et al., P N G Med J 1994; 37: 100-9; Site 5                                                                                                          | Community                   | rural                 | 20-54                                 | 20-54  | 92          | 121    | Unknown                                                |      |
| 895 | Papua New Guinea               | 1986       | King et al., P N G Med J 1994; 37: 100-9; Site 6                                                                                                          | Community                   | rural                 | 20-54                                 | 20-54  | 97          | 112    | Unknown                                                |      |
| 896 | Papua New Guinea               | 1985-1986  | INTERSALT                                                                                                                                                 | Community                   | rural                 | 20-59                                 | 20-59  | 88          | 74     | Random-zero                                            |      |
| 897 | Papua New Guinea               | 2007       | STEPS                                                                                                                                                     | National                    | both                  | 18-64                                 | 18-64  | 1,291       | 1,325  | Digital                                                |      |
| 898 | Peru                           | 2005       | FRENT                                                                                                                                                     | Subnational                 | urban                 | 25+                                   | 25+    | 1,052       | 2,147  | Unknown                                                |      |
| 899 | Peru                           | 2004-2005  | CArdiovascular Risk factors Multiple Evaluation in Latin America (CARMELA)                                                                                | Community                   | urban                 | 25-64                                 | 25-64  | 769         | 883    | Standard                                               |      |
| 900 | Peru                           | 2004-2005  | Encuesta Nacional de Indicadores Nutricionales, Bioquímicos, Socioeconómicos y Culturales Relacionados con las Enfermedades Crónicas Degenerativas (ENIN) | National                    | both                  | 20+                                   | 20+    | 2,091       | 2,101  | Standard                                               |      |

|     | Country     | Data years | Survey/Study name/Citation                                                           | Level of representativeness | Rural, urban, or both | Age range as used for global analysis |        | Sample size |        | Type of blood pressure measurement device <sup>1</sup> | Note |
|-----|-------------|------------|--------------------------------------------------------------------------------------|-----------------------------|-----------------------|---------------------------------------|--------|-------------|--------|--------------------------------------------------------|------|
|     |             |            |                                                                                      |                             |                       | Male                                  | Female | Male        | Female |                                                        |      |
| 901 | Peru        | 2007-2008  | PERU MIGRANT Study                                                                   | Community                   | both                  | 35+                                   | 35+    | 406         | 442    | Digital                                                |      |
| 902 | Peru        | 2010       | DHS                                                                                  | National                    | both                  | 50+                                   | 18+    | 7,736       | 28,604 | Digital                                                |      |
| 903 | Peru        | 2009-2012  | CRONICAS Cohort Study                                                                | Subnational                 | both                  | 35+                                   | 35+    | 1,557       | 1,659  | Digital                                                |      |
| 904 | Peru        | 2011       | DHS                                                                                  | National                    | both                  | 40+                                   | 40+    | 12,894      | 14,866 | Digital                                                |      |
| 905 | Peru        | 2012       | DHS                                                                                  | National                    | both                  | 40+                                   | 40+    | 14,278      | 15,928 | Digital                                                |      |
| 906 | Peru        | 2013       | DHS                                                                                  | National                    | both                  | 18+                                   | 18+    | 2,759       | 15,967 | Digital                                                |      |
| 907 | Peru        | 2014       | DHS                                                                                  | National                    | both                  | 18+                                   | 18+    | 11,882      | 13,933 | Digital                                                |      |
| 908 | Peru        | 2015       | DHS                                                                                  | National                    | both                  | 18+                                   | 18+    | 13,826      | 17,479 | Digital                                                |      |
| 909 | Philippines | 1998-1999  | Cebu Longitudinal Health and Nutrition Survey 1998-1999 Mother Followup              | Community                   | both                  |                                       | 20-59  |             | 1,913  | Standard                                               |      |
| 910 | Philippines | 2002       | Cebu Longitudinal Health and Nutrition Survey 2002 Child Followup                    | Community                   | both                  | 18-19                                 | 18-19  | 1,085       | 896    | Standard                                               |      |
| 911 | Philippines | 2002       | Cebu Longitudinal Health and Nutrition Survey 2002 Mother Followup                   | Community                   | both                  |                                       | 32-66  |             | 2,080  | Standard                                               |      |
| 912 | Philippines | 2003-2004  | National Nutrition and Health Survey                                                 | National                    | both                  | 20+                                   | 20+    | 2,222       | 2,183  | Standard                                               |      |
| 913 | Philippines | 2005       | Cebu Longitudinal Health and Nutrition Survey 2005 Child Followup                    | Community                   | both                  | 20-22                                 | 20-22  | 1,005       | 831    | Standard                                               |      |
| 914 | Philippines | 2005       | Cebu Longitudinal Health and Nutrition Survey 2005 Mother Followup                   | Community                   | both                  |                                       | 35-69  |             | 2,001  | Standard                                               |      |
| 915 | Philippines | 2007       | Cebu Longitudinal Health and Nutrition Survey 2007 Child Followup                    | Community                   | both                  | 23-24                                 | 23-24  | 992         | 776    | Standard                                               |      |
| 916 | Philippines | 2007       | Cebu Longitudinal Health and Nutrition Survey 2007 Mother Followup                   | Community                   | both                  |                                       | 38-71  |             | 1,974  | Standard                                               |      |
| 917 | Philippines | 2008       | Philippines LIFECARE Cohort                                                          | National                    | both                  | 20-49                                 | 20-49  | 1,329       | 1,743  | Digital                                                |      |
| 918 | Philippines | 2009       | Cebu Longitudinal Health and Nutrition Survey 2009 Child Followup                    | Community                   | both                  | 24-26                                 | 24-26  | 907         | 742    | Standard                                               |      |
| 919 | Philippines | 2009       | Life Course Study in Cardiovascular Disease Epidemiology                             | Subnational                 | both                  | 20-50                                 | 20-50  | 1,329       | 1,741  | Digital                                                |      |
| 920 | Philippines | 2013       | 8th National Nutrition Survey Philippine                                             | National                    | both                  | 18+                                   | 18+    | 69,401      | 67,644 | Standard                                               |      |
| 921 | Poland      | 1980       | Proniewska et al., Roczn Akad Med Im Juliana Marchlewskiego Białymst 1982; 26: 89-95 | Community                   | urban                 | 40-59                                 |        | 2,108       |        | Unknown                                                |      |
| 922 | Poland      | 1980       | Proniewska et al., Roczn Akad Med Im Juliana Marchlewskiego Białymst 1982; 26: 89-95 | Community                   | rural                 | 40-59                                 |        | 746         |        | Unknown                                                |      |
| 923 | Poland      | 1983       | Kocemba et al., J Hypertens Suppl 1991; 9: S286-7                                    | Community                   | urban                 | 70-93                                 | 70-93  | 153         | 359    | Unknown                                                |      |
| 924 | Poland      | 1983-1984  | MONICA, Tarnobrzeg Voivodship                                                        | Community                   | rural                 | 35-64                                 | 35-64  | 1,237       | 1,441  | Standard                                               |      |
| 925 | Poland      | 1983-1985  | MONICA, Warsaw                                                                       | Community                   | urban                 | 35-64                                 | 35-64  | 1,297       | 1,327  | Standard                                               |      |
| 926 | Poland      | 1986       | Kocemba et al., Folia Med Cracov 1988; 29: 141-52                                    | Community                   | urban                 | 70-93                                 | 70-93  | 359         | 153    | Unknown                                                |      |
| 927 | Poland      | 1986       | INTERSALT, Krakow                                                                    | Community                   | urban                 | 20-59                                 | 20-59  | 100         | 100    | Random-zero                                            |      |
| 928 | Poland      | 1986       | INTERSALT, Warsaw                                                                    | Community                   | urban                 | 20-59                                 | 20-59  | 100         | 100    | Random-zero                                            |      |
| 929 | Poland      | 1987-1988  | MONICA, Tarnobrzeg Voivodship                                                        | Community                   | rural                 | 35-64                                 | 35-64  | 616         | 672    | Standard                                               |      |
| 930 | Poland      | 1988-1989  | MONICA, Warsaw                                                                       | Community                   | urban                 | 35-64                                 | 35-64  | 705         | 713    | Standard                                               |      |
| 931 | Poland      | 1989-1990  | CINDI Łódź                                                                           | Community                   | urban                 | 25-64                                 | 25-64  | 822         | 948    | Digital                                                |      |
| 932 | Poland      | 1992-1993  | MONICA, Tarnobrzeg Voivodship                                                        | Community                   | rural                 | 35-64                                 | 35-64  | 621         | 696    | Standard                                               |      |
| 933 | Poland      | 1993       | MONICA, Warsaw                                                                       | Community                   | urban                 | 35-64                                 | 35-64  | 751         | 763    | Standard                                               |      |
| 934 | Poland      | 1995-1996  | CINDI Łódź                                                                           | Community                   | urban                 | 18-64                                 | 18-64  | 954         | 1,417  | Digital                                                |      |
| 935 | Poland      | 1997       | Wilmanska et al., Przegl Lek 2002; 59: 252-5                                         | Community                   | rural                 | 75+                                   | 75+    | 83          | 147    | Unknown                                                |      |
| 936 | Poland      | 1997       | Wilmanska et al., Przegl Lek 2002; 59: 252-5                                         | Community                   | urban                 | 75+                                   | 75+    | 91          | 142    | Unknown                                                |      |
| 937 | Poland      | 2000       | CINDI Torun                                                                          | Community                   | urban                 | 18-83                                 | 18-79  | 930         | 1,020  | Digital                                                |      |
| 938 | Poland      | 2001-2002  | CINDI Łódź                                                                           | Community                   | urban                 | 18-64                                 | 18-64  | 997         | 838    | Digital                                                |      |
| 939 | Poland      | 2002       | CINDI Łódź senior                                                                    | Community                   | urban                 | 65+                                   | 65+    | 291         | 538    | Digital                                                |      |
| 940 | Poland      | 2003       | The European Male Ageing Study (EMAS)                                                | Community                   | both                  | 40+                                   |        | 407         |        | Digital                                                |      |
| 941 | Poland      | 2002-2005  | Health, Alcohol and Psychosocial factors In Eastern Europe                           | Community                   | urban                 | 45-69                                 | 45-69  | 4,454       | 4,715  | Digital                                                |      |
| 942 | Poland      | 2003-2005  | National Multicenter Health Survey in Poland. Project WOBASZ                         | National                    | both                  | 20-74                                 | 20-74  | 6,311       | 6,967  | Digital                                                |      |
| 943 | Poland      | 2006       | CINDI Torun                                                                          | Community                   | urban                 | 18-65                                 | 18-65  | 749         | 1,114  | Digital                                                |      |
| 944 | Poland      | 2008       | The European Male Ageing Study (EMAS)                                                | Community                   | both                  | 40+                                   |        | 311         |        | Digital                                                |      |
| 945 | Poland      | 2003-2013  | Mogięcica Human Ecology Study                                                        | Community                   | rural                 | 21+                                   | 21+    | 349         | 893    | Digital                                                |      |
| 946 | Poland      | 2007-2011  | Medical, psychological and socioeconomic aspects of aging in Poland (PolSenior)      | National                    | both                  | 55+                                   | 55+    | 2,877       | 2,756  | Digital                                                |      |
| 947 | Poland      | 2011       | NATPOL                                                                               | National                    | both                  | 20-79                                 | 20-79  | 1,128       | 1,215  | Digital                                                |      |
| 948 | Portugal    | 1985       | CINDI                                                                                | Community                   | both                  | 25-64                                 | 25-64  | 601         | 711    | Unknown                                                |      |
| 949 | Portugal    | 1986       | INTERSALT                                                                            | Community                   | both                  | 20-59                                 | 20-59  | 99          | 99     | Random-zero                                            |      |
| 950 | Portugal    | 1999-2003  | EPIPorto Study                                                                       | Community                   | urban                 | 18+                                   | 18+    | 888         | 1,424  | Standard                                               |      |
| 951 | Portugal    | 2003-2004  | The PAP Study                                                                        | National                    | both                  | 18-90                                 | 18-90  | 2,286       | 2,736  | Digital                                                |      |
| 952 | Portugal    | 2010-2012  | Exercise for Elderly                                                                 | Community                   | urban                 | 60-84                                 | 60-84  | 47          | 104    | Digital                                                |      |
| 953 | Portugal    | 2011-2013  | EPITeen - Epidemiological Health Investigation of Teenagers in Porto                 | Community                   | urban                 | 20-23                                 | 20-23  | 853         | 895    | Digital                                                |      |
| 954 | Puerto Rico | 1974-1977  | Puerto Rico Heart Health Program (PRHHP)                                             | Subnational                 | both                  | 43-88                                 |        | 7,910       |        | Standard                                               |      |
| 955 | Puerto Rico | 2006       | Pérez et al., Ethn Dis 2008; 18: 434-41                                              | Community                   | urban                 | 25-84                                 | 25-84  | 276         | 532    | Unknown                                                |      |
| 956 | Qatar       | 2006       | GCC                                                                                  | National                    | both                  | 18+                                   | 18+    | 1,884       | 2,042  | Unknown                                                |      |
| 957 | Qatar       | 2012       | STEPS                                                                                | National                    | both                  | 18-64                                 | 18-64  | 1,039       | 1,355  | Digital                                                |      |

|      | Country               | Data years | Survey/Study name/Citation                                                                                             | Level of representativeness | Rural, urban, or both | Age range as used for global analysis |        | Sample size |        | Type of blood pressure measurement device <sup>1</sup> | Note |
|------|-----------------------|------------|------------------------------------------------------------------------------------------------------------------------|-----------------------------|-----------------------|---------------------------------------|--------|-------------|--------|--------------------------------------------------------|------|
|      |                       |            |                                                                                                                        |                             |                       | Male                                  | Female | Male        | Female |                                                        |      |
| 958  | Romania               | 1986-1987  | MONICA, Bucharest                                                                                                      | Community                   | urban                 | 25-64                                 | 25-64  | 702         | 873    | Standard                                               |      |
| 959  | Romania               | 1997       | Valorile medii si limitele normalitatii unor constante biologice; Infobase 101221a1                                    | National                    | both                  | 15-84                                 | 15-84  | 3,964       | 5,050  | Unknown                                                | 2    |
| 960  | Romania               | 2005       | Study for the Evaluation of Prevalence of Hypertension and Cardiovascular Risk in Adult Population in Romania (SEPHAR) | National                    | both                  | 18+                                   | 18+    | 847         | 1,170  | Digital                                                |      |
| 961  | Romania               | 2014       | Timis County Study                                                                                                     | Community                   | urban                 | 18-19                                 | 18-19  | 9           | 6      | Standard                                               |      |
| 962  | Russian Federation    | 1980       | Mirer et al., Ter Arkh 1985; 57: 52-5                                                                                  | Community                   | urban                 | 40-59                                 | 40-59  | 350         | 329    | Unknown                                                |      |
| 963  | Russian Federation    | 1980       | Mirer et al., Ter Arkh 1985; 57: 52-5                                                                                  | Community                   | rural                 | 40-59                                 | 40-59  | 307         | 259    | Unknown                                                |      |
| 964  | Russian Federation    | 1984       | Konstantinov et al., Kardiologiya 1989; 29: 38-43                                                                      | Community                   | urban                 | 20-69                                 | 20-69  | 1,238       | 1,247  | Unknown                                                |      |
| 965  | Russian Federation    | 1985       | CINDI                                                                                                                  | Community                   | both                  | 25-64                                 | 25-64  | 799         | 800    | Standard                                               |      |
| 966  | Russian Federation    | 1985       | CINDI                                                                                                                  | Community                   | both                  | 25-64                                 | 25-64  | 2,327       | 2,407  | Unknown                                                |      |
| 967  | Russian Federation    | 1985       | CINDI                                                                                                                  | Community                   | both                  | 25-64                                 | 25-64  | 839         | 851    | Unknown                                                |      |
| 968  | Russian Federation    | 1984-1986  | MONICA, Moscow (control)                                                                                               | Community                   | urban                 | 35-64                                 | 35-64  | 774         | 642    | Standard                                               |      |
| 969  | Russian Federation    | 1984-1986  | MONICA, Moscow, Leninsky district                                                                                      | Community                   | urban                 | 35-64                                 | 35-64  | 553         | 622    | Standard                                               |      |
| 970  | Russian Federation    | 1984-1986  | MONICA, Moscow, Chermushkinsky district                                                                                | Community                   | urban                 | 35-64                                 | 35-64  | 600         | 600    | Standard                                               |      |
| 971  | Russian Federation    | 1985       | MONICA, Novosibirsk (intervention)                                                                                     | Community                   | urban                 | 25-64                                 | 25-64  | 797         | 818    | Standard                                               |      |
| 972  | Russian Federation    | 1986       | INTERSALT                                                                                                              | Community                   | urban                 | 20-59                                 | 20-59  | 97          | 97     | Random-zero                                            |      |
| 973  | Russian Federation    | 1985-1986  | MONICA, Novosibirsk, Kirowsky district                                                                                 | Community                   | urban                 | 25-64                                 | 25-64  | 758         | 774    | Standard                                               |      |
| 974  | Russian Federation    | 1985-1986  | MONICA, Novosibirsk, Leninsky district                                                                                 | Community                   | urban                 | 25-64                                 | 25-64  | 624         | 628    | Standard                                               |      |
| 975  | Russian Federation    | 1988       | CINDI                                                                                                                  | Community                   | both                  | 25-64                                 | 25-64  | 839         | 851    | Standard                                               |      |
| 976  | Russian Federation    | 1988       | MONICA, Novosibirsk (intervention)                                                                                     | Community                   | urban                 | 25-64                                 | 25-64  | 840         | 853    | Standard                                               |      |
| 977  | Russian Federation    | 1988-1989  | MONICA, Moscow (control)                                                                                               | Community                   | urban                 | 35-64                                 | 35-64  | 621         | 581    | Standard                                               |      |
| 978  | Russian Federation    | 1988-1989  | MONICA, Moscow, Leninsky district                                                                                      | Community                   | urban                 | 35-64                                 | 35-64  | 597         | 613    | Standard                                               |      |
| 979  | Russian Federation    | 1988-1989  | MONICA, Novosibirsk, Kirowsky district                                                                                 | Community                   | urban                 | 25-64                                 | 25-64  | 876         | 805    | Standard                                               |      |
| 980  | Russian Federation    | 1992       | CINDI                                                                                                                  | Community                   | rural                 | 25-64                                 | 25-64  | 377         | 453    | Standard                                               |      |
| 981  | Russian Federation    | 1992       | Puska et al., Int J Epidemiol 1993; 22: 1048-55                                                                        | Community                   | both                  | 25-64                                 | 25-64  | 379         | 458    | Unknown                                                |      |
| 982  | Russian Federation    | 1992-1995  | MONICA, Moscow (control)                                                                                               | Community                   | urban                 | 35-64                                 | 35-64  | 557         | 527    | Standard                                               |      |
| 983  | Russian Federation    | 1992-1995  | MONICA, Moscow, Leninsky district                                                                                      | Community                   | urban                 | 35-64                                 | 35-64  | 538         | 858    | Standard                                               |      |
| 984  | Russian Federation    | 1992-1993  | Russia Longitudinal Monitoring Survey-Higher School of Economics Round II                                              | National                    | both                  | 18+                                   | 18+    | 4,395       | 5,999  | Unknown                                                |      |
| 985  | Russian Federation    | 1993       | Russia Longitudinal Monitoring Survey-Higher School of Economics Round III                                             | National                    | both                  | 18+                                   | 18+    | 4,559       | 6,400  | Unknown                                                |      |
| 986  | Russian Federation    | 1993-1994  | Russia Longitudinal Monitoring Survey-Higher School of Economics Round IV                                              | National                    | both                  | 18+                                   | 18+    | 4,129       | 5,782  | Unknown                                                |      |
| 987  | Russian Federation    | 1994       | CINDI                                                                                                                  | Community                   | both                  | 25-64                                 | 25-64  | 824         | 868    | Standard                                               |      |
| 988  | Russian Federation    | 1994-1995  | MONICA, Novosibirsk (intervention)                                                                                     | Community                   | urban                 | 25-64                                 | 25-64  | 822         | 865    | Standard                                               |      |
| 989  | Russian Federation    | 1995       | MONICA, Novosibirsk, Kirowsky district                                                                                 | Community                   | urban                 | 25-64                                 | 25-64  | 771         | 787    | Standard                                               |      |
| 990  | Russian Federation    | 2002-2005  | Health, Alcohol and Psychosocial Factors in Eastern Europe                                                             | Community                   | urban                 | 45-69                                 | 45-69  | 4,205       | 5,039  | Digital                                                |      |
| 991  | Russian Federation    | 2007-2010  | SAGE                                                                                                                   | National                    | both                  | 50+                                   | 50+    | 1,350       | 2,464  | Digital                                                |      |
| 992  | Russian Federation    | 2015-2016  | Ufa Eye and Medical Study (UEMS)                                                                                       | Subnational                 | urban                 | 40+                                   | 40+    | 683         | 1,868  | Digital                                                |      |
| 993  | Rwanda                | 2012       | STEPS                                                                                                                  | National                    | both                  | 18-64                                 | 18-64  | 2,492       | 3,998  | Digital                                                |      |
| 994  | Saint Kitts and Nevis | 2007       | STEPS                                                                                                                  | Subnational                 | both                  | 25-64                                 | 25-64  | 454         | 794    | Digital                                                |      |
| 995  | Saint Lucia           | 1981       | Khaw and Rose, Int J Epidemiol 1982; 11: 372-7                                                                         | Subnational                 | rural                 | 15+                                   | 15+    | 168         | 191    | Random-zero                                            | 2    |
| 996  | Saint Lucia           | 2012       | STEPS                                                                                                                  | National                    | both                  | 25-64                                 | 25-64  | 573         | 918    | Digital                                                |      |
| 997  | Samoa                 | 1979-1982  | McGarvey, Am J Clin Nutr 1991; 53: 1586S-94S                                                                           | National                    | both                  | 18-79                                 | 18+    | 195         | 195    | Standard                                               |      |
| 998  | Samoa                 | 1995       | McGarvey, Pac Health Dialog 2001; 8: 157-62                                                                            | National                    | both                  | 25-69                                 | 25-59  | 143         | 150    | Standard                                               |      |
| 999  | Samoa                 | 2002       | STEPS                                                                                                                  | National                    | both                  | 25-64                                 | 25-64  | 1,197       | 1,346  | Digital                                                |      |
| 1000 | Samoa                 | 2010       | Samoan Genome-Wide Association Study                                                                                   | National                    | both                  | 24-65                                 | 24-65  | 1,396       | 2,043  | Digital                                                |      |
| 1001 | Samoa                 | 2013       | STEPS                                                                                                                  | National                    | both                  | 18-64                                 | 18-64  | 604         | 901    | Digital                                                |      |
| 1002 | Sao Tome and Principe | 2009       | STEPS                                                                                                                  | National                    | both                  | 25-64                                 | 25-64  | 1,047       | 1,322  | Digital                                                |      |
| 1003 | Saudi Arabia          | 1989-1994  | National Nutrition Survey                                                                                              | National                    | both                  | 18-39                                 | 18-39  | 1,514       | 2,599  | Standard                                               |      |
| 1004 | Saudi Arabia          | 1994       | FEPHD; Soyannwo et al., Afr J Med Med Sci 1998; 27: 107-16                                                             | Community                   | both                  | 15+                                   | 15+    | 1,158       | 1,689  | Unknown                                                | 2    |
| 1005 | Saudi Arabia          | 1995-2000  | National Epidemiological Health Survey; Al-Nozha et al., Saudi Med J 25:1603-10, 2004                                  | National                    | both                  | 30-69                                 | 30-69  | 8,224       | 9,006  | Standard                                               |      |
| 1006 | Saudi Arabia          | 2004-2005  | STEPS                                                                                                                  | National                    | both                  | 15-64                                 | 15-64  | 2,259       | 2,357  | Digital                                                | 2    |
| 1007 | Saudi Arabia          | 2011-2013  | Jeddah City Study                                                                                                      | Community                   | urban                 | 20+                                   | 20+    | 514         | 639    | Standard                                               |      |
| 1008 | Saudi Arabia          | 2013       | Saudi Health Information Survey                                                                                        | National                    | both                  | 15+                                   | 15+    | 5,194       | 5,411  | Digital                                                | 2    |
| 1009 | Serbia                | 1984       | MONICA, Novi Sad                                                                                                       | Community                   | urban                 | 25-64                                 | 25-64  | 798         | 777    | Standard                                               |      |
| 1010 | Serbia                | 1985       | CINDI                                                                                                                  | Community                   | urban                 | 25-64                                 | 25-64  | 801         | 781    | Unknown                                                |      |
| 1011 | Serbia                | 1987       | Serbian Cohorts of Seven Countries Study, Velika Krsna; Kromhout et al., Int J Epidemiol 1994; 23: 5-11                | Community                   | rural                 | 65-69                                 |        | 97          |        | Standard                                               |      |
| 1012 | Serbia                | 1988-1989  | MONICA, Novi Sad                                                                                                       | Community                   | urban                 | 25-64                                 | 25-64  | 778         | 791    | Standard                                               |      |
| 1013 | Serbia                | 1994-1995  | MONICA, Novi Sad                                                                                                       | Community                   | urban                 | 25-64                                 | 25-64  | 600         | 670    | Standard                                               |      |

|      | Country         | Data years | Survey/Study name/Citation                                                                                                                          | Level of representativeness | Rural, urban, or both | Age range as used for global analysis |        | Sample size |        | Type of blood pressure measurement device <sup>1</sup> | Note |
|------|-----------------|------------|-----------------------------------------------------------------------------------------------------------------------------------------------------|-----------------------------|-----------------------|---------------------------------------|--------|-------------|--------|--------------------------------------------------------|------|
|      |                 |            |                                                                                                                                                     |                             |                       | Male                                  | Female | Male        | Female |                                                        |      |
| 1014 | Serbia          | 2000       | Health Status, Health Needs and Utilization of Health Care of the Population of Serbia                                                              | National                    | both                  | 20+                                   | 20+    | 4,200       | 5,257  | Unknown                                                |      |
| 1015 | Serbia          | 2006       | National Health Survey Serbia                                                                                                                       | National                    | both                  | 20+                                   | 20+    | 6,640       | 7,513  | Standard                                               |      |
| 1016 | Serbia          | 2013       | National Health Survey                                                                                                                              | National                    | both                  | 15+                                   | 15+    | 6,586       | 7,704  | Digital                                                | 2    |
| 1017 | Serbia          | 2013-2014  | Stay Fit for Lifelong Health: The Prevalence of Lifestyle Health Conditions in Serbian Population                                                   | National                    | urban                 | 18-65                                 |        | 1,367       |        | Digital                                                |      |
| 1018 | Seychelles      | 1989       | Seychelles Heart Survey I                                                                                                                           | National                    | both                  | 25-64                                 | 25-64  | 513         | 568    | Standard                                               |      |
| 1019 | Seychelles      | 1994       | Seychelles Heart Survey II                                                                                                                          | National                    | both                  | 25-64                                 | 25-64  | 504         | 563    | Standard                                               |      |
| 1020 | Seychelles      | 2003       | School Screening Program                                                                                                                            | National                    | both                  |                                       | 18-19  |             |        | Digital                                                |      |
| 1021 | Seychelles      | 2004       | Seychelles Heart Survey III                                                                                                                         | National                    | both                  | 25-64                                 | 25-64  | 568         | 687    | Standard                                               |      |
| 1022 | Seychelles      | 2013-2014  | Seychelles Heart Survey IV                                                                                                                          | National                    | both                  | 25-64                                 | 25-64  | 531         | 699    | Standard                                               |      |
| 1023 | Sierra Leone    | 1995       | Lisk et al., Ethn Dis 1999; 9: 254-63                                                                                                               | Community                   | urban                 | 15+                                   | 15+    | 201         | 397    | Unknown                                                | 2    |
| 1024 | Sierra Leone    | 1995       | Lisk et al., Ethn Dis 1999; 9: 254-63                                                                                                               | Community                   | rural                 | 15+                                   | 15+    | 255         | 351    | Unknown                                                | 2    |
| 1025 | Sierra Leone    | 2009       | STEPS                                                                                                                                               | National                    | both                  | 25-64                                 | 25-64  | 2,214       | 2,332  | Digital                                                |      |
| 1026 | Singapore       | 1982-1985  | Thyroid Heart Study                                                                                                                                 | National                    | both                  | 18+                                   | 18+    | 1,036       | 995    | Standard                                               |      |
| 1027 | Singapore       | 1992       | National Health Survey                                                                                                                              | National                    | both                  | 18-64                                 | 18-64  | 1,744       | 1,704  | Standard                                               |      |
| 1028 | Singapore       | 1993-1995  | NUH Heart Study                                                                                                                                     | National                    | both                  | 26+                                   | 26-79  | 498         | 484    | Standard                                               |      |
| 1029 | Singapore       | 1998       | National Health Survey                                                                                                                              | National                    | both                  | 18-69                                 | 18-69  | 2,569       | 2,830  | Standard                                               |      |
| 1030 | Singapore       | 2004       | National Health Survey                                                                                                                              | National                    | both                  | 25-74                                 | 25-74  | 1,801       | 1,852  | Standard                                               |      |
| 1031 | Singapore       | 2004-2007  | Combined follow up of Singapore Cardiovascular Cohort study and Singapore Prospective study                                                         | National                    | both                  | 24+                                   | 24+    | 2,467       | 2,666  | Standard                                               |      |
| 1032 | Singapore       | 2009       | Social Isolation, Health and Lifestyles Survey (SIHLS) 2009                                                                                         | National                    | both                  | 60+                                   | 60+    | 2,050       | 2,438  | Digital                                                |      |
| 1033 | Singapore       | 2010       | National Health Survey                                                                                                                              | National                    | both                  | 30-69                                 | 30-69  | 1,573       | 1,676  | Standard                                               |      |
| 1034 | Singapore       | 2009-2011  | The Singapore Chinese Eye Study                                                                                                                     | Community                   | both                  | 40+                                   | 40+    | 1,662       | 1,691  | Digital                                                |      |
| 1035 | Singapore       | 2012-2013  | Singapore Health Study                                                                                                                              | National                    | both                  | 18-79                                 | 18-79  | 958         | 1,026  | Standard                                               |      |
| 1036 | Slovakia        | 1993       | Countrywide Integrated Noncommunicable Diseases Intervention Programme                                                                              | National                    | both                  | 18-64                                 | 18-64  | 763         | 1,215  | Standard                                               |      |
| 1037 | Slovakia        | 1998       | Countrywide Integrated Noncommunicable Diseases Intervention Programme                                                                              | National                    | both                  | 18-64                                 | 18-64  | 857         | 1,046  | Standard                                               |      |
| 1038 | Slovakia        | 2003       | Countrywide Integrated Noncommunicable Diseases Intervention Programme                                                                              | National                    | both                  | 18-64                                 | 18-64  | 622         | 867    | Standard                                               |      |
| 1039 | Slovakia        | 2008       | Countrywide Integrated Noncommunicable Diseases Intervention Programme                                                                              | National                    | both                  | 18-64                                 | 18-64  | 391         | 561    | Standard                                               |      |
| 1040 | Slovakia        | 2011-2012  | European Health Examination Survey                                                                                                                  | National                    | both                  | 18-64                                 | 18-64  | 885         | 1,080  | Digital                                                |      |
| 1041 | Slovenia        | 2014       | Analysis of Children's Development in Slovenia (ACDSi)                                                                                              | National                    | urban                 | 18-19                                 | 18-19  | 144         | 126    | Digital                                                |      |
| 1042 | Solomon Islands | 2006       | STEPS                                                                                                                                               | Subnational                 | both                  | 18-64                                 | 18-64  | 990         | 1,308  | Digital                                                |      |
| 1043 | Solomon Islands | 2009-2010  | Influences of the large-scale disaster and related socioecological changes on people's nutritional status and health in the Western Solomon Islands | Subnational                 | rural                 | 18+                                   | 18+    | 153         | 215    | Digital                                                |      |
| 1044 | Solomon Islands | 2009-2010  | Influences of the large-scale disaster and related socioecological changes on people's nutritional status and health in the Western Solomon Islands | Community                   | urban                 | 20-69                                 | 18-70  | 22          | 58     | Digital                                                |      |
| 1045 | South Africa    | 1981       | Seedat and Hackland, Trans R Soc Trop Med Hyg 1984; 78: 785-9                                                                                       | Community                   | rural                 | 15+                                   | 15+    | 1,472       | 3,521  | Unknown                                                | 2    |
| 1046 | South Africa    | 1982       | Steyn et al., S Afr Med J 1985; 67: 619-25                                                                                                          | Community                   | rural                 | 15-64                                 | 15-64  | 478         | 498    | Unknown                                                | 2    |
| 1047 | South Africa    | 1983       | Ijsselmuiden, S Afr Med J 1985; 67: 773-5                                                                                                           | Community                   | urban                 | 21-60                                 | 21-60  | 40          | 392    | Unknown                                                |      |
| 1048 | South Africa    | 1990       | Mollentze et al., S Afr Med J 1995; 85: 90-6; Site 1                                                                                                | Community                   | both                  | 25+                                   | 25+    | 279         | 574    | Unknown                                                |      |
| 1049 | South Africa    | 1990       | Mollentze et al., S Afr Med J 1995; 85: 90-6; Site 2                                                                                                | Community                   | both                  | 25+                                   | 25+    | 290         | 468    | Unknown                                                |      |
| 1050 | South Africa    | 1993       | Charlton et al., S Afr Med J 1997; 87: 1124-30                                                                                                      | Community                   | urban                 | 65+                                   | 65+    | 96          | 104    | Unknown                                                |      |
| 1051 | South Africa    | 1993       | CORIS; Steyn et al., Int J Epidemiol 1997; 26: 964-71; Site 1                                                                                       | Community                   | urban                 | 35-44                                 | 35-44  | 55          | 51     | Unknown                                                |      |
| 1052 | South Africa    | 1993       | CORIS; Steyn et al., Int J Epidemiol 1997; 26: 964-71; Site 2                                                                                       | Community                   | urban                 | 35-44                                 | 35-44  | 57          | 59     | Unknown                                                |      |
| 1053 | South Africa    | 1993       | CORIS; Steyn et al., Int J Epidemiol 1997; 26: 964-71; Site 3                                                                                       | Community                   | urban                 | 35-44                                 | 35-44  | 51          | 54     | Unknown                                                |      |
| 1054 | South Africa    | 1995       | Charlton et al., S Afr Med J 1997; 87: 1124-30                                                                                                      | Community                   | urban                 | 65+                                   | 65+    | 66          | 76     | Unknown                                                |      |
| 1055 | South Africa    | 1998       | DHS                                                                                                                                                 | National                    | both                  | 18+                                   | 18+    | 4,996       | 7,055  | Digital                                                |      |
| 1056 | South Africa    | 2001       | Alberts et al., Eur J Cardiovasc Prev Rehabil 2005; 12: 347-54                                                                                      | Community                   | rural                 | 30+                                   | 30+    | 498         | 1,607  | Unknown                                                |      |
| 1057 | South Africa    | 2003       | SASPI; Thorogood et al., BMC Public Health 2007; 7: 326                                                                                             | Community                   | rural                 | 35+                                   | 35+    | 82          | 270    | Unknown                                                |      |
| 1058 | South Africa    | 2003       | DHS                                                                                                                                                 | National                    | both                  | 18+                                   | 18+    | 2,888       | 4,183  | Digital                                                |      |
| 1059 | South Africa    | 2003-2004  | Africa Centre Biomeasure Survey                                                                                                                     | Community                   | rural                 | 25-49                                 | 25-49  | 790         | 1,758  | Digital                                                |      |
| 1060 | South Africa    | 2008       | National Income Dynamics Study Wave I                                                                                                               | National                    | both                  | 18+                                   | 18+    | 4,855       | 7,426  | Digital                                                |      |
| 1061 | South Africa    | 2007-2008  | SAGE                                                                                                                                                | National                    | both                  | 50+                                   | 50+    | 1,583       | 2,137  | Digital                                                |      |
| 1062 | South Africa    | 2008-2009  | Cape Town Bellville South Cohort Study - Baseline evaluation I                                                                                      | Community                   | urban                 | 18+                                   | 18+    | 218         | 707    | Digital                                                |      |
| 1063 | South Africa    | 2008-2009  | Cardiovascular Risk in Black South Africans (CRIBSA) study                                                                                          | Community                   | urban                 | 25-74                                 | 25-74  | 392         | 707    | Digital                                                |      |
| 1064 | South Africa    | 2010       | Africa Centre Biomeasure Survey                                                                                                                     | Community                   | rural                 | 18+                                   | 18+    | 2,755       | 7,119  | Digital                                                |      |
| 1065 | South Africa    | 2010-2011  | National Income Dynamics Study Wave II                                                                                                              | National                    | both                  | 18+                                   | 18+    | 30,980      | 49,186 | Digital                                                |      |
| 1066 | South Africa    | 2012       | National Income Dynamics Study Wave III                                                                                                             | National                    | both                  | 18+                                   | 18+    | 33,284      | 54,384 | Digital                                                |      |
| 1067 | South Korea     | 1986       | INTERSALT                                                                                                                                           | Community                   | urban                 | 20-59                                 | 20-59  | 100         | 98     | Random-zero                                            |      |
| 1068 | South Korea     | 1998       | Korea National Health and Nutrition Examination Survey                                                                                              | National                    | both                  | 18+                                   | 18+    | 3,741       | 4,488  | Standard                                               |      |

|      | Country     | Data years | Survey/Study name/Citation                                                                                | Level of representativeness | Rural, urban, or both | Age range as used for global analysis |        | Sample size |         | Type of blood pressure measurement device <sup>1</sup> | Note |
|------|-------------|------------|-----------------------------------------------------------------------------------------------------------|-----------------------------|-----------------------|---------------------------------------|--------|-------------|---------|--------------------------------------------------------|------|
|      |             |            |                                                                                                           |                             |                       | Male                                  | Female | Male        | Female  |                                                        |      |
| 1069 | South Korea | 2001       | Kim et al., Br J Psychiatry 2004; 185: 102-7                                                              | Community                   | both                  | 65+                                   | 65+    | 300         | 432     | Unknown                                                |      |
| 1070 | South Korea | 2001       | Korea National Health and Nutrition Examination Survey                                                    | National                    | both                  | 18+                                   | 18+    | 2,695       | 3,467   | Standard                                               |      |
| 1071 | South Korea | 2002-2003  | Korean National Health Insurance                                                                          | National                    | both                  | 40+                                   | 40+    | 64,510      | 53,449  | Unknown                                                |      |
| 1072 | South Korea | 2005       | Korea National Health and Nutrition Examination Survey                                                    | National                    | both                  | 18+                                   | 18+    | 2,406       | 3,174   | Standard                                               |      |
| 1073 | South Korea | 2004-2005  | Korean National Health Insurance                                                                          | National                    | both                  | 40+                                   | 40+    | 76,643      | 69,279  | Unknown                                                |      |
| 1074 | South Korea | 2006       | KLoSHA                                                                                                    | Community                   | urban                 | 64+                                   | 64+    | 299         | 415     | Unknown                                                |      |
| 1075 | South Korea | 2007       | Korea National Health and Nutrition Examination Survey                                                    | National                    | both                  | 18+                                   | 18+    | 1,282       | 1,767   | Standard                                               |      |
| 1076 | South Korea | 2006-2007  | Korean National Health Insurance                                                                          | National                    | both                  | 40+                                   | 40+    | 93,208      | 92,125  | Unknown                                                |      |
| 1077 | South Korea | 2008       | Korea National Health and Nutrition Examination Survey                                                    | National                    | both                  | 18+                                   | 18+    | 2,902       | 3,980   | Standard                                               |      |
| 1078 | South Korea | 2009       | Korea National Health and Nutrition Examination Survey                                                    | National                    | both                  | 18+                                   | 18+    | 3,317       | 4,274   | Standard                                               |      |
| 1079 | South Korea | 2008-2009  | Korean National Health Insurance                                                                          | National                    | both                  | 40+                                   | 40+    | 115,935     | 121,788 | Unknown                                                |      |
| 1080 | South Korea | 2010       | Korea National Health and Nutrition Examination Survey                                                    | National                    | both                  | 18+                                   | 18+    | 2,766       | 3,593   | Standard                                               |      |
| 1081 | South Korea | 2011       | Korea National Health and Nutrition Examination Survey                                                    | National                    | both                  | 18+                                   | 18+    | 2,685       | 3,565   | Standard                                               |      |
| 1082 | South Korea | 2010-2011  | Korean National Health Insurance                                                                          | National                    | both                  | 40+                                   | 40+    | 135,057     | 143,245 | Unknown                                                |      |
| 1083 | South Korea | 2012       | Korea National Health and Nutrition Examination Survey                                                    | National                    | both                  | 18+                                   | 18+    | 2,522       | 3,474   | Standard                                               |      |
| 1084 | South Korea | 2013       | Korea National Health and Nutrition Examination Survey                                                    | National                    | both                  | 18+                                   | 18+    | 2,508       | 3,303   | Standard                                               |      |
| 1085 | South Korea | 2012-2013  | Korean National Health Insurance                                                                          | National                    | both                  | 40+                                   | 40+    | 143,709     | 152,991 | Unknown                                                |      |
| 1086 | Spain       | 1982       | Martinez et al., Rev Clin Esp 1987; 180: 25-31                                                            | Community                   | urban                 | 21+                                   | 21+    | 4,755       | 5,018   | Unknown                                                |      |
| 1087 | Spain       | 1984       | Tormerl-Soler et al., Rev Clin Esp 1989; 185: 253-6                                                       | Community                   | rural                 | 15+                                   | 15+    | 886         | 956     | Unknown                                                | 2    |
| 1088 | Spain       | 1985       | INTERSALT, Manresa                                                                                        | Community                   | urban                 | 20-59                                 | 20-59  | 100         | 100     | Random-zero                                            |      |
| 1089 | Spain       | 1986       | Plans et al., Med Clin (Barc) 1992; 98: 369-72                                                            | Community                   | urban                 | 15+                                   | 15+    | 330         | 374     | Unknown                                                | 2    |
| 1090 | Spain       | 1986       | Custodi et al., Aten Primaria 1989; 6: 151-8                                                              | Community                   | both                  | 20+                                   | 20+    | 321         | 307     | Unknown                                                |      |
| 1091 | Spain       | 1986       | INTERSALT, Torrejo                                                                                        | Community                   | urban                 | 20-59                                 | 20-59  | 100         | 100     | Random-zero                                            |      |
| 1092 | Spain       | 1986-1988  | MONICA, Catalonia                                                                                         | Community                   | urban                 | 25-64                                 | 25-64  | 1,252       | 1,271   | Random-zero                                            |      |
| 1093 | Spain       | 1989       | Cardiovascular Risk Study in Catalonia                                                                    | Subnational                 | both                  | 20+                                   | 20+    | 310         | 344     | Standard                                               |      |
| 1094 | Spain       | 1990       | Banegas et al., Hypertension 1998; 32: 998-1002                                                           | National                    | both                  | 35-65                                 | 35-65  | 810         | 1,211   | Random-zero                                            |      |
| 1095 | Spain       | 1990-1992  | MONICA, Catalonia                                                                                         | Community                   | urban                 | 25-64                                 | 25-64  | 1,720       | 1,192   | Random-zero                                            |      |
| 1096 | Spain       | 1992       | CINDI                                                                                                     | Subnational                 | both                  | 25-64                                 | 25-64  | 1,202       | 1,458   | Standard                                               |      |
| 1097 | Spain       | 1991-1993  | Encuesta de Factores de Riesgo Cardiovascular en la Región de Murcia (Cardiovascular Risk Factors Survey) | Subnational                 | both                  | 18-69                                 | 18-69  | 1,512       | 1,563   | Standard                                               |      |
| 1098 | Spain       | 1994-1995  | Encuesta de Nutrición y Salud Comunidad Valenciana 1994-95 (ENCV)                                         | Subnational                 | both                  | 18+                                   | 18+    | 749         | 900     | Digital                                                |      |
| 1099 | Spain       | 1994-1996  | MONICA, Catalonia                                                                                         | Community                   | urban                 | 25-64                                 | 25-64  | 1,802       | 1,631   | Random-zero                                            |      |
| 1100 | Spain       | 1996       | de Pablos-Velasco et al., J Hypertens 2002; 20: 1965-71                                                   | Community                   | rural                 | 30+                                   | 30+    | 305         | 385     | Unknown                                                |      |
| 1101 | Spain       | 1998       | Rodriguez and Hoffmann, Lakartidningen 2001; 98: 1964                                                     | Subnational                 | both                  | 18-75                                 | 18-75  | 627         | 738     | Unknown                                                |      |
| 1102 | Spain       | 1999-2000  | Factores de riesgo en las islas Baleares: Estudio CORSAIB                                                 | Subnational                 | both                  | 35-75                                 | 35-75  | 813         | 870     | Digital                                                |      |
| 1103 | Spain       | 2000-2001  | Regidor et al., J Hum Hypertens 2006; 20: 73-82                                                           | National                    | both                  | 60+                                   | 60+    | 1,408       | 2,461   | Unknown                                                |      |
| 1104 | Spain       | 2000-2001  | EUREYE Study                                                                                              | Subnational                 | both                  | 65+                                   | 65+    | 274         | 324     | Digital                                                |      |
| 1105 | Spain       | 2001-2002  | Catalan Health Interview Survey                                                                           | Subnational                 | both                  | 18-74                                 | 18-74  | 606         | 760     | Digital                                                |      |
| 1106 | Spain       | 2001-2003  | Diabetes, Nutrición y Obesidad en la población adulta de la Región de Murcia (DINO)                       | Subnational                 | both                  | 20+                                   | 20+    | 716         | 832     | Digital                                                |      |
| 1107 | Spain       | 2003       | Vara-Gonzalez et al., Rev Esp Salud Publica 2007; 81: 211-9                                               | Community                   | both                  | 18+                                   | 18+    | 550         | 646     | Unknown                                                |      |
| 1108 | Spain       | 2000-2005  | CDC of the Canary Islands                                                                                 | Community                   | both                  | 20-75                                 | 20-75  | 2,801       | 3,651   | Digital                                                |      |
| 1109 | Spain       | 2003       | The European Male Ageing Study (EMAS)                                                                     | Community                   | both                  | 40-79                                 |        | 406         |         | Digital                                                |      |
| 1110 | Spain       | 2004       | Perez-Fernandez et al., J Hum Hypertens 2007; 21: 366-73                                                  | Community                   | rural                 | 25-84                                 | 25-84  | 1,171       | 1,343   | Unknown                                                |      |
| 1111 | Spain       | 2004       | Vioque et al., Obesity 2008; 16: 664-670                                                                  | Community                   | urban                 | 24+                                   | 24+    | 85          | 116     | Digital                                                |      |
| 1112 | Spain       | 2004       | Cardiovascular Risk Study in Castilla y León                                                              | Subnational                 | both                  | 18+                                   | 18+    | 1,852       | 2,015   | Digital                                                |      |
| 1113 | Spain       | 2003-2005  | Registre Gironi del Cor (REGICOR)                                                                         | Subnational                 | both                  | 35-79                                 | 35-79  | 2,964       | 3,289   | Digital                                                |      |
| 1114 | Spain       | 2004-2006  | PREVICTUS                                                                                                 | National                    | both                  | 60+                                   | 60+    | 3,416       | 3,915   | Digital                                                |      |
| 1115 | Spain       | 2008       | The European Male Ageing Study (EMAS)                                                                     | Community                   | both                  | 40+                                   |        | 267         |         | Digital                                                |      |
| 1116 | Spain       | 2007-2009  | Harmonizing Equation of Risk in Mediterranean countries EXTremadura                                       | Subnational                 | both                  | 25-79                                 | 25-79  | 1,298       | 1,498   | Digital                                                |      |
| 1117 | Spain       | 2008-2010  | Study on Nutrition and Cardiovascular Risk in Spain (ENRICA)                                              | National                    | both                  | 18+                                   | 18+    | 5,792       | 6,414   | Digital                                                |      |
| 1118 | Spain       | 2015       | Study on Nutrition and Cardiovascular Risk in Spain (ENRICA)                                              | National                    | both                  | 60+                                   | 60+    | 741         | 799     | Digital                                                |      |
| 1119 | Sri Lanka   | 2006       | STEPS                                                                                                     | National                    | both                  | 18-64                                 | 18-64  | 5,695       | 5,931   | Digital                                                |      |
| 1120 | Sudan       | 2005-2006  | STEPS                                                                                                     | National                    | both                  | 25-64                                 | 25-64  | 620         | 872     | Digital                                                |      |
| 1121 | Swaziland   | 2014       | STEPS                                                                                                     | National                    | both                  | 18-69                                 | 18-69  | 997         | 1,860   | Digital                                                |      |
| 1122 | Sweden      | 1972       | The Swedish Conscript Study                                                                               | National                    | both                  | 17-18                                 |        | 50,215      |         | Standard                                               | 2,4  |
| 1123 | Sweden      | 1973       | The Swedish Conscript Study                                                                               | National                    | both                  | 17-18                                 |        | 54,774      |         | Standard                                               | 2,4  |
| 1124 | Sweden      | 1974       | The Swedish Conscript Study                                                                               | National                    | both                  | 17-18                                 |        | 56,668      |         | Standard                                               | 2,4  |
| 1125 | Sweden      | 1975       | The Swedish Conscript Study                                                                               | National                    | both                  | 17-18                                 |        | 53,048      |         | Standard                                               | 2    |

|      | Country | Data years | Survey/Study name/Citation                                              | Level of representativeness | Rural, urban, or both | Age range as used for global analysis |        | Sample size |        | Type of blood pressure measurement device <sup>1</sup> | Note |
|------|---------|------------|-------------------------------------------------------------------------|-----------------------------|-----------------------|---------------------------------------|--------|-------------|--------|--------------------------------------------------------|------|
|      |         |            |                                                                         |                             |                       | Male                                  | Female | Male        | Female |                                                        |      |
| 1126 | Sweden  | 1976       | The Swedish Conscription Study                                          | National                    | both                  | 17-18                                 |        | 51,609      |        | Standard                                               | 2    |
| 1127 | Sweden  | 1977       | The Swedish Conscription Study                                          | National                    | both                  | 17-18                                 |        | 49,814      |        | Standard                                               | 2    |
| 1128 | Sweden  | 1978       | The Swedish Conscription Study                                          | National                    | both                  | 17-18                                 |        | 12,882      |        | Standard                                               | 2    |
| 1129 | Sweden  | 1979       | The Swedish Conscription Study                                          | National                    | both                  | 17-18                                 |        | 38,280      |        | Standard                                               | 2    |
| 1130 | Sweden  | 1980       | Ohlson et al., Diabetologia 1987; 30: 386-93                            | Community                   | urban                 | 67-67                                 |        | 575         |        | Unknown                                                |      |
| 1131 | Sweden  | 1980       | The Swedish Conscription Study                                          | National                    | both                  | 17-18                                 |        | 50,577      |        | Standard                                               | 2    |
| 1132 | Sweden  | 1981       | The Swedish Conscription Study                                          | National                    | both                  | 17-18                                 |        | 53,678      |        | Standard                                               | 2    |
| 1133 | Sweden  | 1982       | Lernfelt et al., J Hypertens 1990; 8: 483-90                            | Community                   | urban                 | 70-70                                 | 70-70  | 232         | 215    | Unknown                                                |      |
| 1134 | Sweden  | 1982       | Cederholm, Ups J Med Sci 1985; 90: 201-27                               | Community                   | urban                 | 47-54                                 | 47-54  | 371         | 436    | Unknown                                                |      |
| 1135 | Sweden  | 1982       | The Swedish Conscription Study                                          | National                    | both                  | 17-18                                 |        | 55,797      |        | Standard                                               | 2    |
| 1136 | Sweden  | 1983       | Wilhelmsen et al., J Intern Med 2008; 263: 636-43                       | Community                   | urban                 | 50-50                                 |        | 776         |        | Unknown                                                |      |
| 1137 | Sweden  | 1983       | Bengtsson et al., Eur J Vasc Surg 1991; 5: 53-7                         | Community                   | urban                 | 74-74                                 |        | 338         |        | Unknown                                                |      |
| 1138 | Sweden  | 1983       | The Swedish Conscription Study                                          | National                    | both                  | 17-18                                 |        | 54,567      |        | Standard                                               | 2    |
| 1139 | Sweden  | 1980-1984  | Uppsala Longitudinal Study of Adult Men                                 | Community                   | both                  | 60-60                                 |        | 1,847       |        | Standard                                               |      |
| 1140 | Sweden  | 1984       | The Swedish Conscription Study                                          | National                    | both                  | 17-18                                 |        | 37,404      |        | Standard                                               | 2    |
| 1141 | Sweden  | 1985       | MONICA Gothenburg                                                       | Community                   | urban                 | 25-64                                 | 25-64  | 550         | 595    | Random-zero                                            |      |
| 1142 | Sweden  | 1985       | The Swedish Conscription Study                                          | National                    | both                  | 17-18                                 |        | 11,174      |        | Standard                                               | 2    |
| 1143 | Sweden  | 1986       | Bjorkelund and Bengtsson, Scand J Soc Med 1991; 19: 218-24              | Community                   | urban                 |                                       | 45-64  |             | 927    | Unknown                                                |      |
| 1144 | Sweden  | 1986       | MONICA, Northern Sweden                                                 | Subnational                 | urban                 | 25-64                                 | 25-64  | 820         | 799    | Random-zero                                            |      |
| 1145 | Sweden  | 1986       | The Swedish Conscription Study                                          | National                    | both                  | 17-18                                 |        | 46,350      |        | Standard                                               | 2    |
| 1146 | Sweden  | 1987       | The Swedish Conscription Study                                          | National                    | both                  | 17-18                                 |        | 50,489      |        | Standard                                               | 2    |
| 1147 | Sweden  | 1988       | Ellenius et al., Scand J Prim Health Care 1994; 12: 289-94              | Community                   | urban                 |                                       | 40-59  |             | 300    | Unknown                                                |      |
| 1148 | Sweden  | 1988       | The Swedish Conscription Study                                          | National                    | both                  | 17-18                                 |        | 48,944      |        | Standard                                               | 2    |
| 1149 | Sweden  | 1989       | The Swedish Conscription Study                                          | National                    | both                  | 17-18                                 |        | 49,490      |        | Standard                                               | 2    |
| 1150 | Sweden  | 1990       | CRISS; Henriksson et al., Eur J Epidemiol 2001; 17: 521-6               | Community                   | urban                 | 37-37                                 |        | 991         |        | Unknown                                                |      |
| 1151 | Sweden  | 1990       | Lind et al., Scand J Clin Lab Invest 1994; 54: 177-83                   | Community                   | urban                 | 40-40                                 |        | 314         |        | Unknown                                                |      |
| 1152 | Sweden  | 1990       | MONICA, Northern Sweden                                                 | Subnational                 | urban                 | 25-64                                 | 25-64  | 764         | 794    | Random-zero                                            |      |
| 1153 | Sweden  | 1990       | MONICA Gothenburg                                                       | Community                   | urban                 | 25-64                                 | 25-64  | 766         | 766    | Random-zero                                            |      |
| 1154 | Sweden  | 1990       | The Swedish Conscription Study                                          | National                    | both                  | 17-18                                 |        | 50,321      |        | Standard                                               | 2    |
| 1155 | Sweden  | 1991       | Asplund-Carlson and Carlson, J Intern Med 1994; 236: 57-64              | Community                   | urban                 | 40-50                                 |        | 1,564       |        | Unknown                                                |      |
| 1156 | Sweden  | 1991       | The Swedish Conscription Study                                          | National                    | both                  | 17-18                                 |        | 44,554      |        | Standard                                               | 2    |
| 1157 | Sweden  | 1992       | Women in Gothenburg; Bjorkelund et al., Diabetes Care 2005; 28: 2739-44 | Community                   | urban                 |                                       | 38-84  |             | 1,042  | Unknown                                                |      |
| 1158 | Sweden  | 1985-1996  | EPIC Umea                                                               | Subnational                 | both                  | 24-72                                 | 24-72  | 12,139      | 12,985 | Standard                                               |      |
| 1159 | Sweden  | 1992       | The Swedish Conscription Study                                          | National                    | both                  | 17-18                                 |        | 43,239      |        | Standard                                               | 2    |
| 1160 | Sweden  | 1993       | Wilhelmsen et al., J Intern Med 2008; 263: 636-43                       | Community                   | urban                 | 50-50                                 |        | 798         |        | Unknown                                                |      |
| 1161 | Sweden  | 1993       | The Swedish Conscription Study                                          | National                    | both                  | 17-18                                 |        | 47,494      |        | Standard                                               | 2    |
| 1162 | Sweden  | 1991-1995  | Uppsala Longitudinal Study of Adult Men                                 | Community                   | both                  | 70-70                                 |        | 1,216       |        | Standard                                               |      |
| 1163 | Sweden  | 1994       | Andersson et al., J Hypertens 2000; 18: 1753-61                         | Community                   | urban                 |                                       | 50-62  |             | 876    | Unknown                                                |      |
| 1164 | Sweden  | 1994       | Helicobacter Pylori                                                     | Community                   | urban                 | 56-65                                 | 56-65  | 170         | 217    | Standard                                               |      |
| 1165 | Sweden  | 1991-1996  | Malmö Diet and Cancer                                                   | Community                   | urban                 | 45-73                                 | 45-73  | 12,101      | 18,291 | Standard                                               |      |
| 1166 | Sweden  | 1994       | MONICA, Northern Sweden                                                 | Subnational                 | urban                 | 25-64                                 | 25-64  | 736         | 769    | Random-zero                                            |      |
| 1167 | Sweden  | 1994       | The Swedish Conscription Study                                          | National                    | both                  | 17-18                                 |        | 44,601      |        | Standard                                               | 2    |
| 1168 | Sweden  | 1995       | Rosmond and Bjorntorp, J Hypertens 1998; 16: 1721-6                     | Community                   | urban                 | 51-51                                 |        | 284         |        | Unknown                                                |      |
| 1169 | Sweden  | 1995       | MONICA Gothenburg                                                       | Community                   | urban                 | 25-64                                 | 25-64  | 741         | 863    | Random-zero                                            |      |
| 1170 | Sweden  | 1995       | The Swedish Conscription Study                                          | National                    | both                  | 17-18                                 |        | 44,523      |        | Standard                                               | 2    |
| 1171 | Sweden  | 1996       | The Swedish Conscription Study                                          | National                    | both                  | 17-18                                 |        | 43,819      |        | Standard                                               | 2    |
| 1172 | Sweden  | 1997       | The Swedish Conscription Study                                          | National                    | both                  | 17-18                                 |        | 35,848      |        | Standard                                               | 2    |
| 1173 | Sweden  | 1998       | WHILA; Lidfeldt et al., Blood Press 2002; 11: 270-8                     | Community                   | urban                 |                                       | 50-59  |             | 6,901  | Unknown                                                |      |
| 1174 | Sweden  | 1998       | The Swedish Conscription Study                                          | National                    | both                  | 17-18                                 |        | 39,023      |        | Standard                                               | 2    |
| 1175 | Sweden  | 1999       | MONICA Northern Sweden                                                  | Subnational                 | both                  | 25-74                                 | 25-74  | 889         | 934    | Digital                                                |      |
| 1176 | Sweden  | 1999       | The Swedish Conscription Study                                          | National                    | both                  | 17-18                                 |        | 30,185      |        | Standard                                               | 2    |
| 1177 | Sweden  | 1997-2001  | Uppsala Longitudinal Study of Adult Men                                 | Community                   | both                  | 77-77                                 |        | 782         |        | Standard                                               |      |
| 1178 | Sweden  | 2000       | Women in Gothenburg; Bjorkelund et al., Diabetes Care 2005; 28: 2739-44 | Community                   | urban                 |                                       | 70-92  |             | 559    | Unknown                                                |      |
| 1179 | Sweden  | 2000       | The Swedish Conscription Study                                          | National                    | both                  | 17-18                                 |        | 20,703      |        | Standard                                               | 2    |
| 1180 | Sweden  | 2001       | Gause-Nilsson et al., Acta Diabetol 2006; 43: 120-6                     | Community                   | urban                 | 70-70                                 | 70-70  | 243         | 265    | Unknown                                                |      |
| 1181 | Sweden  | 2001       | Lissner et al., Scand J Prim Health Care 2003; 21: 242-7                | Community                   | urban                 |                                       | 70+    |             | 494    | Unknown                                                |      |
| 1182 | Sweden  | 2001       | Molander et al., J Am Geriatr Soc 2008; 56: 1853-9                      | Community                   | both                  | 85+                                   | 85+    | 98          | 250    | Unknown                                                |      |

|      | Country              | Data years | Survey/Study name/Citation                                                           | Level of representativeness | Rural, urban, or both | Age range as used for global analysis |        | Sample size |        | Type of blood pressure measurement device <sup>1</sup> | Note |
|------|----------------------|------------|--------------------------------------------------------------------------------------|-----------------------------|-----------------------|---------------------------------------|--------|-------------|--------|--------------------------------------------------------|------|
|      |                      |            |                                                                                      |                             |                       | Male                                  | Female | Male        | Female |                                                        |      |
| 1183 | Sweden               | 2001-2003  | Uppsala Longitudinal Study of Adult Men                                              | Community                   | both                  | 82-82                                 |        | 524         |        | Standard                                               |      |
| 1184 | Sweden               | 2003       | Wilhelmsen et al., J Intern Med 2008; 263: 636-43                                    | Community                   | urban                 | 50-50                                 |        | 595         |        | Unknown                                                |      |
| 1185 | Sweden               | 2003       | Brohall et al., Diabetes Care 2006; 29: 363-7                                        | Community                   | urban                 |                                       | 64-64  |             | 2,382  | Unknown                                                |      |
| 1186 | Sweden               | 2003       | The European Male Ageing Study (EMAS)                                                | Community                   | both                  | 40+                                   |        | 397         |        | Digital                                                |      |
| 1187 | Sweden               | 2001-2004  | Swedish INTERGENE Cohort Study                                                       | Subnational                 | both                  | 24-76                                 | 24-76  | 1,691       | 1,905  | Digital                                                |      |
| 1188 | Sweden               | 2001-2004  | Prospective Investigation of the Vasculature in Uppsala Seniors (PIVUS)              | Community                   | both                  | 70-70                                 | 70-70  | 506         | 506    | Standard                                               |      |
| 1189 | Sweden               | 2004       | Welin et al., BMC Public Health 2008; 8: 403                                         | Community                   | urban                 | 50-60                                 | 50-50  | 1,250       | 667    | Unknown                                                |      |
| 1190 | Sweden               | 2004       | MONICA Northern Sweden                                                               | Subnational                 | both                  | 25-74                                 | 25-74  | 910         | 957    | Digital                                                |      |
| 1191 | Sweden               | 2005       | Women in Gothenburg; Bjorkelund et al., Diabetes Care 2005; 28: 2739-44              | Community                   | urban                 |                                       | 75-87  |             | 366    | Unknown                                                |      |
| 1192 | Sweden               | 2004-2005  | European Youth Heart Study (EYHS) II                                                 | Subnational                 | both                  | 20-21                                 | 20-21  | 70          | 111    | Digital                                                |      |
| 1193 | Sweden               | 2004-2005  | Population Study of Women in Gothenburg                                              | Community                   | urban                 |                                       | 38-50  |             | 493    | Standard                                               |      |
| 1194 | Sweden               | 2008       | The European Male Ageing Study (EMAS)                                                | Community                   | both                  | 40+                                   |        | 370         |        | Digital                                                |      |
| 1195 | Sweden               | 2006-2009  | Prospective Investigation of the Vasculature in Uppsala Seniors (PIVUS)              | Community                   | both                  | 75-75                                 | 75-75  | 407         | 418    | Standard                                               |      |
| 1196 | Sweden               | 2009       | MONICA Northern Sweden                                                               | Subnational                 | both                  | 25-74                                 | 25-74  | 850         | 872    | Digital                                                |      |
| 1197 | Sweden               | 2014       | MONICA Northern Sweden                                                               | Subnational                 | both                  | 25-74                                 | 25-74  | 756         | 806    | Digital                                                |      |
| 1198 | Switzerland          | 1984-1986  | The Swiss MONICA Study Wave I                                                        | Subnational                 | both                  | 25-74                                 | 25-74  | 1,749       | 1,692  | Random-zero                                            |      |
| 1199 | Switzerland          | 1988-1989  | The Swiss MONICA Study Wave II                                                       | Subnational                 | both                  | 25-74                                 | 25-74  | 1,775       | 1,683  | Random-zero                                            |      |
| 1200 | Switzerland          | 1990       | Bodenmann and Ackermann-Lieblich, Schweiz Med Wochenschr Suppl 1993; 48: 38-45       | Community                   | urban                 | 25-74                                 | 25-74  | 252         | 280    | Unknown                                                |      |
| 1201 | Switzerland          | 1993       | Bus Santé Survey                                                                     | Community                   | urban                 | 35-74                                 | 35-74  | 410         | 279    | Unknown                                                |      |
| 1202 | Switzerland          | 1992-1993  | The Swiss MONICA Study Wave III                                                      | Subnational                 | both                  | 25-74                                 | 25-74  | 1,570       | 1,670  | Random-zero                                            |      |
| 1203 | Switzerland          | 1994       | Bus Santé Survey                                                                     | Community                   | urban                 | 35-74                                 | 35-74  | 300         | 342    | Unknown                                                |      |
| 1204 | Switzerland          | 1995       | Bus Santé Survey                                                                     | Community                   | urban                 | 35-74                                 | 35-74  | 446         | 462    | Unknown                                                |      |
| 1205 | Switzerland          | 1996       | Bus Santé Survey                                                                     | Community                   | urban                 | 35-74                                 | 35-74  | 576         | 581    | Unknown                                                |      |
| 1206 | Switzerland          | 1997       | Bus Santé Survey                                                                     | Community                   | urban                 | 35-74                                 | 35-74  | 593         | 635    | Unknown                                                |      |
| 1207 | Switzerland          | 1998       | Bus Santé Survey                                                                     | Community                   | urban                 | 35-74                                 | 35-74  | 602         | 534    | Unknown                                                |      |
| 1208 | Switzerland          | 1999       | Bus Santé Survey                                                                     | Community                   | urban                 | 35-74                                 | 35-74  | 620         | 576    | Unknown                                                |      |
| 1209 | Switzerland          | 2000       | Bus Santé Survey                                                                     | Community                   | urban                 | 35-74                                 | 35-74  | 562         | 592    | Unknown                                                |      |
| 1210 | Switzerland          | 2001       | Bus Santé Survey                                                                     | Community                   | urban                 | 35-74                                 | 35-74  | 650         | 635    | Unknown                                                |      |
| 1211 | Switzerland          | 2002       | SAPALDIA 2; Nitsch et al., Nephrol Dial Transplant 2006; 21: 935-44                  | Subnational                 | both                  | 55+                                   | 55+    | 1,349       | 1,404  | Unknown                                                |      |
| 1212 | Switzerland          | 2003-2006  | Cohorte Lausannoise                                                                  | Community                   | urban                 | 35-75                                 | 35-75  | 3,185       | 3,531  | Digital                                                |      |
| 1213 | Switzerland          | 2007-2012  | Bus Santé Study                                                                      | Subnational                 | both                  | 20-80                                 | 20-80  | 1,886       | 1,913  | Digital                                                |      |
| 1214 | Switzerland          | 2009-2012  | Cohorte Lausannoise                                                                  | Community                   | urban                 | 40-79                                 | 40-79  | 2,199       | 2,507  | Digital                                                |      |
| 1215 | Syrian Arab Republic | 2002       | national survey on non-communicable diseases and factors affecting their development | National                    | both                  | 15-64                                 | 15-64  | 3,664       | 5,425  | Unknown                                                | 2    |
| 1216 | Taiwan               | 1985       | INTERSALT                                                                            | Community                   | rural                 | 20-59                                 | 20-59  | 89          | 92     | Random-zero                                            |      |
| 1217 | Taiwan               | 1990       | Liau et al., Int J Cardiol 1998; 67: 177-81                                          | Subnational                 | both                  | 65+                                   | 65+    | 1,283       | 1,235  | Unknown                                                |      |
| 1218 | Taiwan               | 1993-1994  | The Kinmen Neurological Disorders Survey                                             | Community                   | urban                 | 50+                                   | 50+    | 1,446       | 1,339  | Standard                                               |      |
| 1219 | Taiwan               | 1995       | Lu et al., Gerontol A Biol Sci Med Sci 2000; 55: M463-8                              | Community                   | urban                 | 65+                                   | 65+    | 477         | 399    | Unknown                                                |      |
| 1220 | Taiwan               | 1993-1996  | Nutrition and Health Survey in Taiwan (NAHSIT)                                       | National                    | both                  | 18+                                   | 18+    | 2,588       | 2,612  | Standard                                               |      |
| 1221 | Taiwan               | 1999-2000  | Nutrition and Health Survey in Taiwan (NAHSIT)                                       | National                    | both                  | 65+                                   | 65+    | 1,277       | 1,217  | Digital                                                |      |
| 1222 | Taiwan               | 2002       | Taiwanese Survey on Hypertension, Hyperglycemia and Hyperlipidemia (TwSHHH)          | National                    | both                  | 15+                                   | 15+    | 3,335       | 3,606  | Standard                                               | 2    |
| 1223 | Taiwan               | 2005       | TCHS                                                                                 | Community                   | urban                 | 40+                                   | 40+    | 1,147       | 1,212  | Unknown                                                |      |
| 1224 | Taiwan               | 2005-2008  | Nutrition and Health Survey in Taiwan (NAHSIT)                                       | National                    | both                  | 19+                                   | 19+    | 1,342       | 1,402  | Digital                                                |      |
| 1225 | Taiwan               | 2007       | Taiwanese Survey on Hypertension, Hyperglycemia and Hyperlipidemia (TwSHHH)          | National                    | both                  | 20+                                   | 20+    | 2,160       | 2,468  | Digital                                                |      |
| 1226 | Tanzania             | 1987       | CARDIAC Study; Njelekela et al., Acta Tropica 2001; 78: 231-9; Site 1                | Community                   | both                  | 47-57                                 | 47-57  | 88          | 96     | Unknown                                                |      |
| 1227 | Tanzania             | 1987       | CARDIAC Study; Njelekela et al., Acta Tropica 2001; 78: 231-9; Site 2                | Community                   | both                  | 47-57                                 | 47-57  | 58          | 64     | Unknown                                                |      |
| 1228 | Tanzania             | 1987       | CARDIAC Study; Njelekela et al., Acta Tropica 2001; 78: 231-9; Site 3                | Community                   | both                  | 47-57                                 | 47-57  | 103         | 83     | Unknown                                                |      |
| 1229 | Tanzania             | 1989       | Swai et al., Int J Epidemiol 1993; 22: 651-9; Site 1                                 | Subnational                 | rural                 | 15+                                   | 15+    | 1,472       | 2,271  | Unknown                                                | 2    |
| 1230 | Tanzania             | 1989       | Swai et al., Int J Epidemiol 1993; 22: 651-9; Site 2                                 | Subnational                 | rural                 | 15+                                   | 15+    | 1,239       | 1,317  | Unknown                                                | 2    |
| 1231 | Tanzania             | 1989       | Swai et al., Int J Epidemiol 1993; 22: 651-9; Site 3                                 | Subnational                 | rural                 | 15+                                   | 15+    | 430         | 543    | Unknown                                                | 2    |
| 1232 | Tanzania             | 1996       | Edwards et al., J Hypertens 2000; 18: 145-52                                         | Community                   | urban                 | 15-54                                 | 15-54  | 303         | 408    | Unknown                                                | 2    |
| 1233 | Tanzania             | 1997       | Edwards et al., J Hypertens 2000; 18: 145-52                                         | Community                   | rural                 | 15-54                                 | 15-54  | 288         | 404    | Unknown                                                | 2    |
| 1234 | Tanzania             | 1998       | CARDIAC Study; Njelekela et al., Acta Tropica 2001; 78: 231-9; Site 4                | Community                   | both                  | 47-57                                 | 47-57  | 93          | 91     | Unknown                                                |      |
| 1235 | Tanzania             | 1998       | CARDIAC Study; Njelekela et al., Acta Tropica 2001; 78: 231-9; Site 5                | Community                   | both                  | 47-57                                 | 47-57  | 41          | 61     | Unknown                                                |      |
| 1236 | Tanzania             | 1998       | CARDIAC Study; Njelekela et al., Acta Tropica 2001; 78: 231-9; Site 6                | Community                   | both                  | 47-57                                 | 47-57  | 81          | 79     | Unknown                                                |      |
| 1237 | Tanzania             | 1998-1999  | Bovet et al., Int J Epidemiol 2002; 31: 240-7                                        | Community                   | urban                 | 25-64                                 | 25-64  | 3,600       | 5,654  | Digital                                                |      |
| 1238 | Tanzania             | 2011       | STEPS                                                                                | Subnational                 | both                  | 25-64                                 | 25-64  | 1,008       | 1,508  | Digital                                                |      |
| 1239 | Tanzania             | 2012       | STEPS                                                                                | National                    | both                  | 25-64                                 | 25-64  | 2,585       | 2,834  | Digital                                                |      |



|      | Country              | Data years | Survey/Study name/Citation                                                                                                       | Level of representativeness | Rural, urban, or both | Age range as used for global analysis |        | Sample size |        | Type of blood pressure measurement device <sup>1</sup> | Note |
|------|----------------------|------------|----------------------------------------------------------------------------------------------------------------------------------|-----------------------------|-----------------------|---------------------------------------|--------|-------------|--------|--------------------------------------------------------|------|
|      |                      |            |                                                                                                                                  |                             |                       | Male                                  | Female | Male        | Female |                                                        |      |
| 1240 | Tanzania             | 2014       | Dar es Salaam Urban Cohort Hypertension Study                                                                                    | Community                   | urban                 | 40+                                   | 40+    | 971         | 1,271  | Digital                                                |      |
| 1241 | Thailand             | 1991       | Thailand National Health Examination Survey I                                                                                    | National                    | both                  | 18+                                   | 18+    | 5,809       | 8,208  | Standard                                               |      |
| 1242 | Thailand             | 1997       | Thailand National Health Examination Survey II                                                                                   | National                    | both                  | 18+                                   | 18+    | 2,953       | 4,398  | Digital                                                |      |
| 1243 | Thailand             | 2000       | The International Collaborative Study of Cardiovascular Disease in Asia (InterASIA)                                              | National                    | both                  | 35+                                   | 35+    | 2,093       | 3,212  | Standard                                               |      |
| 1244 | Thailand             | 2004       | Thailand National Health Examination Survey III                                                                                  | National                    | both                  | 18+                                   | 18+    | 18,524      | 19,962 | Standard                                               |      |
| 1245 | Thailand             | 2003-2004  | The Fifth National Nutrition Survey of Thailand                                                                                  | National                    | both                  | 15+                                   | 15+    | 1,999       | 3,406  | Unknown                                                | 2    |
| 1246 | Thailand             | 2009       | Thailand National Health Examination Survey IV                                                                                   | National                    | both                  | 15+                                   | 15+    | 9,718       | 10,615 | Digital                                                | 2    |
| 1247 | Timor-Leste          | 2014       | STEPS                                                                                                                            | National                    | both                  | 18-69                                 | 18-69  | 1,066       | 1,452  | Digital                                                |      |
| 1248 | Togo                 | 2010       | STEPS                                                                                                                            | National                    | both                  | 18-64                                 | 18-64  | 1,895       | 1,952  | Digital                                                |      |
| 1249 | Tokelau              | 2005       | STEPS                                                                                                                            | National                    | both                  | 18-64                                 | 18-64  | 241         | 266    | Digital                                                |      |
| 1250 | Tonga                | 2004       | STEPS                                                                                                                            | National                    | both                  | 18-64                                 | 18-64  | 391         | 548    | Digital                                                |      |
| 1251 | Tonga                | 2011       | STEPS                                                                                                                            | National                    | both                  | 20-64                                 | 20-64  | 884         | 1,412  | Digital                                                |      |
| 1252 | Trinidad and Tobago  | 1985       | INTERSALT                                                                                                                        | Community                   | urban                 | 20-59                                 | 20-59  | 84          | 92     | Random-zero                                            |      |
| 1253 | Trinidad and Tobago  | 2001       | Adult Survey                                                                                                                     | National                    | rural                 | 25+                                   | 25+    | 203         | 267    | Digital                                                |      |
| 1254 | Tunisia              | 1989       | Gharbi et al., Rev Epidemiol Sante Publique 1996; 44: 125-32                                                                     | Community                   | rural                 | 35-50                                 | 35-50  | 172         | 210    | Unknown                                                |      |
| 1255 | Tunisia              | 1989       | Gharbi et al., Rev Epidemiol Sante Publique 1996; 44: 125-32                                                                     | Community                   | urban                 | 35-50                                 | 35-50  | 148         | 157    | Unknown                                                |      |
| 1256 | Tunisia              | 1996       | Ghannem and Fredj, Rev Epidemiol Sante Publique 1997; 45: 286-92                                                                 | Community                   | urban                 | 20+                                   | 20+    | 290         | 667    | Unknown                                                |      |
| 1257 | Tunisia              | 1996-1997  | Ariana Healthy Project 1997                                                                                                      | Community                   | both                  | 35-65                                 | 35-65  | 2,655       | 2,724  | Standard                                               |      |
| 1258 | Tunisia              | 1996-1997  | Tunisian National Nutrition Survey 1996-1997                                                                                     | National                    | both                  | 18+                                   | 18+    | 1,397       | 2,674  | Standard                                               |      |
| 1259 | Tunisia              | 2000       | Laouani et al., Tunis Med 2004; 82: 1001-5                                                                                       | Community                   | urban                 | 60+                                   | 60+    | 260         | 340    | Unknown                                                |      |
| 1260 | Tunisia              | 2001       | Ben Romdhane et al., Tunis Med 2005; 83 Suppl 5: 41-6                                                                            | Community                   | both                  | 40-69                                 | 40-69  | 917         | 919    | Unknown                                                |      |
| 1261 | Tunisia              | 2005       | Mode de vie et santé de l'adolescent, Le cas de la Tunisie dans le contexte de la transition épidémiologique                     | National                    | both                  | 18-19                                 | 18-19  | 451         | 583    | Standard                                               |      |
| 1262 | Tunisia              | 2005       | Tunisian National Survey                                                                                                         | National                    | both                  | 35-71                                 | 35-71  | 3,417       | 4,590  | Standard                                               |      |
| 1263 | Tunisia              | 2009-2010  | ObeMaghreb                                                                                                                       | Subnational                 | urban                 | 18-49                                 | 18-49  | 998         | 696    | Standard                                               |      |
| 1264 | Turkey               | 1990       | Turkish Adult Risk Factor Study                                                                                                  | National                    | both                  | 20+                                   | 20+    | 1,344       | 1,372  | Standard                                               |      |
| 1265 | Turkey               | 1995       | Turkish Adult Risk Factor Study                                                                                                  | National                    | both                  | 25+                                   | 25+    | 864         | 894    | Standard                                               |      |
| 1266 | Turkey               | 1998       | Turkish Adult Risk Factor Study                                                                                                  | National                    | both                  | 28+                                   | 28+    | 883         | 915    | Standard                                               |      |
| 1267 | Turkey               | 1999       | Tugay Aytekin et al., Health Soc Care Community 2002; 10: 394-401                                                                | Subnational                 | urban                 | 30+                                   | 30+    | 952         | 1,040  | Unknown                                                |      |
| 1268 | Turkey               | 2000       | Turkish Adult Risk Factor Study                                                                                                  | National                    | both                  | 30+                                   | 30+    | 905         | 952    | Standard                                               |      |
| 1269 | Turkey               | 2001       | The Healthy Nutrition for Healthy Heart Study; Sanisoglu et al., BMC Public Health 2006; 6: 92                                   | National                    | both                  | 25+                                   | 25+    | 4,733       | 5,425  | Unknown                                                |      |
| 1270 | Turkey               | 2002       | Soysal et al., Anadolu Kardiyol Derg 2005; 5: 196-201                                                                            | Subnational                 | urban                 | 20-39                                 | 20-39  | 318         | 567    | Unknown                                                |      |
| 1271 | Turkey               | 2002       | Erem et al., Obes Res 2004; 12: 1117-27                                                                                          | Community                   | urban                 | 25-84                                 | 25-84  | 2,081       | 2,349  | Unknown                                                |      |
| 1272 | Turkey               | 2002       | Onal et al., Blood Press 2004; 13: 31-6                                                                                          | Subnational                 | urban                 | 25-74                                 | 25-84  | 62          | 355    | Unknown                                                |      |
| 1273 | Turkey               | 2001-2002  | Turkish Adult Risk Factor Study                                                                                                  | National                    | both                  | 32+                                   | 32+    | 1,137       | 1,252  | Standard                                               |      |
| 1274 | Turkey               | 2003       | Prevalence, awareness, treatment and control of hypertension in Turkey in 2003                                                   | National                    | both                  | 18+                                   | 18+    | 2,019       | 2,891  | Random-zero                                            |      |
| 1275 | Turkey               | 2004       | Trabzon Hypertension Study; Erem                                                                                                 | Community                   | urban                 | 25-84                                 | 25-84  | 1,906       | 2,219  | Unknown                                                |      |
| 1276 | Turkey               | 2003-2004  | Turkish Adult Risk Factor Study                                                                                                  | National                    | both                  | 34+                                   | 34+    | 1,106       | 1,150  | Standard                                               |      |
| 1277 | Turkey               | 2003-2005  | Prevalence of diabetes and associated risk factors among adult population in Trabzon city                                        | Subnational                 | both                  | 20+                                   | 20+    | 2,208       | 2,601  | Standard                                               |      |
| 1278 | Turkey               | 2005-2006  | Turkish Adult Risk Factor Study                                                                                                  | National                    | both                  | 33+                                   | 33+    | 1,031       | 1,091  | Standard                                               |      |
| 1279 | Turkey               | 2007-2008  | Turkish Adult Risk Factor Study                                                                                                  | National                    | both                  | 35+                                   | 35+    | 1,135       | 1,148  | Standard                                               |      |
| 1280 | Turkey               | 2009-2010  | Turkish Adult Risk Factor Study                                                                                                  | National                    | both                  | 37+                                   | 37+    | 1,490       | 1,555  | Standard                                               |      |
| 1281 | Turkey               | 2011       | Chronic Disease Risk Factor Survey                                                                                               | National                    | both                  | 15+                                   | 15+    | 7,995       | 8,906  | Digital                                                | 2    |
| 1282 | Turkey               | 2012-2013  | Turkish Adult Risk Factor Study                                                                                                  | National                    | both                  | 37+                                   | 40+    | 1,030       | 1,110  | Standard                                               |      |
| 1283 | Turkey               | 2014       | Turkish Adult Risk Factor Study                                                                                                  | National                    | both                  | 44+                                   | 44+    | 345         | 369    | Standard                                               |      |
| 1284 | Turkmenistan         | 2013       | STEPS                                                                                                                            | National                    | both                  | 18-64                                 | 18-64  | 1,931       | 2,887  | Digital                                                |      |
| 1285 | Tuvalu               | 1976       | The Funafuti Survey                                                                                                              | Subnational                 | urban                 | 18+                                   | 18-79  | 280         | 290    | Unknown                                                |      |
| 1286 | Uganda               | 2011-2012  | The Prevalence and Distribution of Non-communicable Diseases and Their Risk Factors in Kasese District, Uganda                   | Subnational                 | both                  | 25-79                                 | 25-79  | 284         | 234    | Digital                                                |      |
| 1287 | Uganda               | 2014       | STEPS                                                                                                                            | National                    | both                  | 18-69                                 | 18-69  | 1,570       | 2,132  | Digital                                                |      |
| 1288 | Ukraine              | 1995       | CINDI                                                                                                                            | Community                   | both                  | 25-64                                 | 25-64  | 788         | 892    | Standard                                               |      |
| 1289 | Ukraine              | 2007       | DHS                                                                                                                              | National                    | both                  | 18-49                                 | 18-49  | 2,327       | 5,125  | Digital                                                |      |
| 1290 | United Arab Emirates | 1990       | el Mugamer et al., J Trop Med Hyg 1995; 98: 407-15                                                                               | Community                   | both                  | 20-59                                 | 20-59  | 109         | 178    | Unknown                                                |      |
| 1291 | United Arab Emirates | 1999-2000  | Emirates National Diabetes and Coronary Artery Disease Risk Factor Study; Malik et al., Diabetes Res Clin Pract 2005; 69: 188-95 | National                    | both                  | 20-79                                 | 20-79  | 2,839       | 3,773  | Standard                                               |      |
| 1292 | United Kingdom       | 1980       | Islington Diabetes Survey; Forrest et al., Diabet Med 1986; 3: 338-42                                                            | Community                   | urban                 | 40+                                   | 40+    | 465         | 619    | Unknown                                                |      |
| 1293 | United Kingdom       | 1982       | MRC National Survey of Health and Development                                                                                    | National                    | both                  | 36-36                                 | 36-36  | 1,639       | 1,651  | Random-zero                                            |      |
| 1294 | United Kingdom       | 1983-1984  | MONICA, Belfast                                                                                                                  | Subnational                 | both                  | 25-64                                 | 25-64  | 1,160       | 1,184  | Random-zero                                            |      |
| 1295 | United Kingdom       | 1985-1986  | INTERSALT, Belfast                                                                                                               | Community                   | urban                 | 20-59                                 | 20-59  | 99          | 100    | Random-zero                                            |      |

|      | Country        | Data years | Survey/Study name/Citation                                                 | Level of representativeness | Rural, urban, or both | Age range as used for global analysis |        | Sample size |        | Type of blood pressure measurement device <sup>1</sup> | Note |
|------|----------------|------------|----------------------------------------------------------------------------|-----------------------------|-----------------------|---------------------------------------|--------|-------------|--------|--------------------------------------------------------|------|
|      |                |            |                                                                            |                             |                       | Male                                  | Female | Male        | Female |                                                        |      |
| 1296 | United Kingdom | 1985       | INTERSALT, Birmingham                                                      | Community                   | urban                 | 20-59                                 | 20-59  | 100         | 100    | Random-zero                                            |      |
| 1297 | United Kingdom | 1985       | INTERSALT, Wales                                                           | Community                   | urban                 | 20-59                                 | 20-59  | 100         | 99     | Random-zero                                            |      |
| 1298 | United Kingdom | 1984-1986  | Scottish Heart Health Survey                                               | Subnational                 | both                  | 40-59                                 | 40-59  | 4,385       | 4,471  | Standard                                               |      |
| 1299 | United Kingdom | 1986-1987  | Dietary and Nutritional Survey of British Adults (DNS)                     | National                    | both                  | 18-64                                 | 18-64  | 1,133       | 1,144  | Digital                                                |      |
| 1300 | United Kingdom | 1986-1987  | MONICA, Belfast                                                            | Subnational                 | both                  | 25-64                                 | 25-64  | 1,164       | 1,185  | Random-zero                                            |      |
| 1301 | United Kingdom | 1987-1988  | Edinburgh Artery Study                                                     | Community                   | urban                 | 54-74                                 | 54-74  | 808         | 783    | Random-zero                                            |      |
| 1302 | United Kingdom | 1989       | MRC National Survey of Health and Development                              | National                    | both                  | 43-43                                 | 43-43  | 1,596       | 1,588  | Random-zero                                            |      |
| 1303 | United Kingdom | 1991-1992  | Health Survey for England                                                  | National                    | both                  | 18+                                   | 18+    | 2,863       | 3,226  | Digital                                                |      |
| 1304 | United Kingdom | 1991-1992  | MONICA, Belfast                                                            | Subnational                 | both                  | 25-64                                 | 25-64  | 999         | 997    | Random-zero                                            |      |
| 1305 | United Kingdom | 1992       | MONICA, Glasgow                                                            | Community                   | urban                 | 25-64                                 | 25-64  | 704         | 779    | Random-zero                                            |      |
| 1306 | United Kingdom | 1993       | Scottish Heart Health Study; Vanderpump et al., Diabet Med 1996; 13: 741-7 | Community                   | urban                 | 35+                                   | 35+    | 724         | 895    | Unknown                                                |      |
| 1307 | United Kingdom | 1992-1994  | Edinburgh Artery Study                                                     | Community                   | urban                 | 60+                                   | 60+    | 580         | 580    | Random-zero                                            |      |
| 1308 | United Kingdom | 1993       | Health Survey for England                                                  | National                    | both                  | 18+                                   | 18+    | 6,538       | 7,293  | Digital                                                |      |
| 1309 | United Kingdom | 1994       | Health Survey for England                                                  | National                    | both                  | 18+                                   | 18+    | 6,053       | 6,993  | Digital                                                |      |
| 1310 | United Kingdom | 1993-1997  | EPIC Norfolk                                                               | Subnational                 | both                  | 40-79                                 | 40-79  | 11,551      | 13,961 | Digital                                                |      |
| 1311 | United Kingdom | 1995       | Health Survey for England                                                  | National                    | both                  | 18+                                   | 18+    | 6,159       | 7,107  | Digital                                                |      |
| 1312 | United Kingdom | 1995       | MONICA, Glasgow                                                            | Community                   | urban                 | 25-64                                 | 25-64  | 857         | 958    | Random-zero                                            |      |
| 1313 | United Kingdom | 1994-1995  | National Diet and Nutrition Survey (NDNS)                                  | National                    | both                  | 65+                                   | 65+    | 743         | 730    | Digital                                                |      |
| 1314 | United Kingdom | 1995       | Scottish Health Survey (SHeS)                                              | Subnational                 | both                  | 18-64                                 | 18-64  | 3,015       | 3,655  | Digital                                                |      |
| 1315 | United Kingdom | 1996       | Health Survey for England                                                  | National                    | both                  | 18+                                   | 18+    | 6,359       | 7,392  | Digital                                                |      |
| 1316 | United Kingdom | 1993-2000  | EPIC Oxford                                                                | Subnational                 | both                  | 20-98                                 | 20-98  | 2,443       | 8,922  | Digital                                                |      |
| 1317 | United Kingdom | 1997       | Health Survey for England                                                  | National                    | both                  | 18+                                   | 18+    | 3,380       | 3,866  | Digital                                                |      |
| 1318 | United Kingdom | 1997       | National Diet and Nutrition Survey (NDNS)                                  | National                    | both                  | 18-18                                 | 18-18  | 49          | 52     | Digital                                                |      |
| 1319 | United Kingdom | 1998       | Health Survey for England                                                  | National                    | both                  | 18+                                   | 18+    | 5,947       | 7,035  | Digital                                                |      |
| 1320 | United Kingdom | 1998-1999  | INTERMAP, Belfast                                                          | Community                   | urban                 | 40-59                                 | 40-59  | 125         | 97     | Random-zero                                            |      |
| 1321 | United Kingdom | 1997-1999  | INTERMAP, WestBromwich                                                     | Community                   | urban                 | 40-59                                 | 40-59  | 141         | 138    | Random-zero                                            |      |
| 1322 | United Kingdom | 1998       | Scottish Health Survey (SHeS)                                              | Subnational                 | both                  | 18-74                                 | 18-74  | 3,184       | 3,995  | Digital                                                |      |
| 1323 | United Kingdom | 1998-2000  | The British Regional Heart Study                                           | National                    | urban                 | 60-79                                 |        | 4,141       |        | Digital                                                |      |
| 1324 | United Kingdom | 1999       | MRC National Survey of Health and Development                              | National                    | both                  | 53-53                                 | 53-53  | 1,452       | 1,478  | Digital                                                |      |
| 1325 | United Kingdom | 1999-2001  | British Women's Heart and Health Study                                     | National                    | both                  |                                       | 60-79  |             | 3,801  | Digital                                                |      |
| 1326 | United Kingdom | 1999-2001  | Edinburgh Artery Study                                                     | Community                   | urban                 | 66-87                                 | 66-87  | 373         | 404    | Random-zero                                            |      |
| 1327 | United Kingdom | 2000       | Health Survey for England                                                  | National                    | both                  | 18+                                   | 18+    | 3,199       | 4,118  | Digital                                                |      |
| 1328 | United Kingdom | 1999-2004  | Hertfordshire Cohort Study                                                 | Subnational                 | both                  | 59-73                                 | 60-73  | 1,574       | 1,412  | Digital                                                |      |
| 1329 | United Kingdom | 2001       | Health Survey for England                                                  | National                    | both                  | 18+                                   | 18+    | 5,402       | 6,449  | Digital                                                |      |
| 1330 | United Kingdom | 2000-2001  | National Diet and Nutrition Survey (NDNS)                                  | National                    | both                  | 19-64                                 | 19-64  | 797         | 939    | Digital                                                |      |
| 1331 | United Kingdom | 2002       | Health Survey for England                                                  | National                    | both                  | 18+                                   | 18+    | 3,163       | 4,021  | Digital                                                |      |
| 1332 | United Kingdom | 2003       | The European Male Ageing Study (EMAS)                                      | Community                   | both                  | 40+                                   |        | 395         |        | Digital                                                |      |
| 1333 | United Kingdom | 2003       | Health Survey for England                                                  | National                    | both                  | 18+                                   | 18+    | 4,897       | 5,945  | Digital                                                |      |
| 1334 | United Kingdom | 2003       | Scottish Health Survey (SHeS)                                              | Subnational                 | both                  | 18+                                   | 18+    | 2,311       | 2,901  | Digital                                                |      |
| 1335 | United Kingdom | 2004-2005  | English Longitudinal Study of Ageing Wave 2                                | National                    | both                  | 52+                                   | 52+    | 3,404       | 4,159  | Digital                                                |      |
| 1336 | United Kingdom | 2005       | Health Survey for England                                                  | National                    | both                  | 18+                                   | 18+    | 3,214       | 3,906  | Digital                                                |      |
| 1337 | United Kingdom | 2006       | Health Survey for England                                                  | National                    | both                  | 18+                                   | 18+    | 4,512       | 5,434  | Digital                                                |      |
| 1338 | United Kingdom | 2007       | Health Survey for England                                                  | National                    | both                  | 18+                                   | 18+    | 2,121       | 2,596  | Digital                                                |      |
| 1339 | United Kingdom | 2008       | The European Male Ageing Study (EMAS)                                      | Community                   | both                  | 40+                                   |        | 315         |        | Digital                                                |      |
| 1340 | United Kingdom | 2008       | Health Survey for England                                                  | National                    | both                  | 18+                                   | 18+    | 4,572       | 5,607  | Digital                                                |      |
| 1341 | United Kingdom | 2008       | Scottish Health Survey (SHeS)                                              | Subnational                 | both                  | 18+                                   | 18+    | 485         | 587    | Digital                                                |      |
| 1342 | United Kingdom | 2008-2009  | English Longitudinal Study of Ageing Wave 4                                | National                    | both                  | 50+                                   | 50+    | 3,824       | 4,622  | Digital                                                |      |
| 1343 | United Kingdom | 2009       | Health Survey for England                                                  | National                    | both                  | 18+                                   | 18+    | 1,416       | 1,686  | Digital                                                |      |
| 1344 | United Kingdom | 2006-2010  | MRC National Survey of Health and Development                              | National                    | both                  | 60-64                                 | 60-64  | 1,065       | 1,151  | Digital                                                |      |
| 1345 | United Kingdom | 2009       | Scottish Health Survey (SHeS)                                              | Subnational                 | both                  | 18+                                   | 18+    | 467         | 614    | Digital                                                |      |
| 1346 | United Kingdom | 2010       | Health Survey for England                                                  | National                    | both                  | 18+                                   | 18+    | 2,311       | 2,994  | Digital                                                |      |
| 1347 | United Kingdom | 2008-2012  | National Diet and Nutrition Survey (NDNS)                                  | National                    | both                  | 18+                                   | 18+    | 704         | 918    | Digital                                                |      |
| 1348 | United Kingdom | 2010       | Scottish Health Survey (SHeS)                                              | Subnational                 | both                  | 18+                                   | 18+    | 434         | 575    | Digital                                                |      |
| 1349 | United Kingdom | 2011       | Health Survey for England                                                  | National                    | both                  | 18+                                   | 18+    | 2,405       | 3,064  | Digital                                                |      |
| 1350 | United Kingdom | 2011       | Scottish Health Survey (SHeS)                                              | Subnational                 | both                  | 18+                                   | 18+    | 415         | 529    | Digital                                                |      |
| 1351 | United Kingdom | 2012       | Health Survey for England                                                  | National                    | both                  | 18+                                   | 18+    | 2,297       | 2,946  | Digital                                                |      |
| 1352 | United Kingdom | 2012       | Scottish Health Survey (SHeS)                                              | Subnational                 | both                  | 18+                                   | 18+    | 421         | 529    | Digital                                                |      |

|      | Country                  | Data years | Survey/Study name/Citation                                                                   | Level of representativeness | Rural, urban, or both | Age range as used for global analysis |        | Sample size |        | Type of blood pressure measurement device <sup>1</sup> | Note |
|------|--------------------------|------------|----------------------------------------------------------------------------------------------|-----------------------------|-----------------------|---------------------------------------|--------|-------------|--------|--------------------------------------------------------|------|
|      |                          |            |                                                                                              |                             |                       | Male                                  | Female | Male        | Female |                                                        |      |
| 1353 | United Kingdom           | 2012-2013  | English Longitudinal Study of Ageing Wave 6                                                  | National                    | both                  | 50+                                   | 50+    | 3,527       | 4,283  | Digital                                                |      |
| 1354 | United Kingdom           | 2013       | Health Survey for England                                                                    | National                    | both                  | 18+                                   | 18+    | 2,633       | 3,281  | Digital                                                |      |
| 1355 | United Kingdom           | 2013       | Scottish Health Survey (SHeS)                                                                | Subnational                 | both                  | 18+                                   | 18+    | 514         | 646    | Digital                                                |      |
| 1356 | United Kingdom           | 2014       | Health Survey for England                                                                    | National                    | both                  | 18+                                   | 18+    | 2,358       | 2,918  | Digital                                                |      |
| 1357 | United Kingdom           | 2014       | Scottish Health Survey (SHeS)                                                                | Subnational                 | both                  | 18+                                   | 18+    | 536         | 695    | Digital                                                |      |
| 1358 | United States of America | 1971-1975  | US NHANES I                                                                                  | National                    | both                  | 25-74                                 | 25-74  | 3,141       | 3,657  | Standard                                               | 4    |
| 1359 | United States of America | 1975-1978  | Framingham Heart Study (FHS)                                                                 | Community                   | urban                 | 55-86                                 | 55-88  | 1,142       | 1,608  | Standard                                               |      |
| 1360 | United States of America | 1977-1979  | Framingham Heart Study (FHS)                                                                 | Community                   | urban                 | 57-88                                 | 57-89  | 1,011       | 1,494  | Standard                                               |      |
| 1361 | United States of America | 1976-1980  | US NHANES II                                                                                 | National                    | both                  | 18-74                                 | 18-74  | 5,909       | 6,565  | Standard                                               |      |
| 1362 | United States of America | 1978-1979  | Bogalusa Heart Study (BHS)                                                                   | Community                   | rural                 | 18-21                                 | 18-21  | 44          | 35     | Standard                                               |      |
| 1363 | United States of America | 1979-1980  | MONICA, Stanford                                                                             | Subnational                 | urban                 | 25-64                                 | 25-64  | 674         | 761    | Standard                                               |      |
| 1364 | United States of America | 1979-1982  | Framingham Heart Study (FHS)                                                                 | Community                   | urban                 | 59-90                                 | 59-91  | 897         | 1,335  | Standard                                               |      |
| 1365 | United States of America | 1979-1983  | Framingham Heart Study (FHS) - Offspring Cohort                                              | Community                   | urban                 | 21-68                                 | 21-68  | 1,823       | 1,950  | Standard                                               |      |
| 1366 | United States of America | 1981-1982  | Bogalusa Heart Study (BHS)                                                                   | Community                   | rural                 | 18-21                                 | 18-21  | 38          | 26     | Standard                                               |      |
| 1367 | United States of America | 1982-1983  | Established Populations for Epidemiologic Studies of the Elderly, Baseline, East Boston      | Community                   | urban                 | 65+                                   | 65+    | 1,391       | 2,266  | Standard                                               |      |
| 1368 | United States of America | 1982-1983  | Established Populations for Epidemiologic Studies of the Elderly, Baseline, Iowa             | Subnational                 | both                  | 65+                                   | 65+    | 1,153       | 1,952  | Standard                                               |      |
| 1369 | United States of America | 1982-1983  | Established Populations for Epidemiologic Studies of the Elderly, Baseline, New Haven        | Community                   | urban                 | 65+                                   | 65+    | 1,112       | 1,557  | Standard                                               |      |
| 1370 | United States of America | 1981-1984  | Framingham Heart Study (FHS)                                                                 | Community                   | urban                 | 61-92                                 | 60-93  | 800         | 1,221  | Standard                                               |      |
| 1371 | United States of America | 1983-1985  | Bogalusa Heart Study (BHS)                                                                   | Community                   | rural                 | 18-21                                 | 18-21  | 50          | 27     | Standard                                               |      |
| 1372 | United States of America | 1983-1985  | Framingham Heart Study (FHS)                                                                 | Community                   | urban                 | 62-93                                 | 61-95  | 676         | 1,028  | Standard                                               |      |
| 1373 | United States of America | 1983-1987  | Framingham Heart Study (FHS) - Offspring Cohort                                              | Community                   | urban                 | 24-72                                 | 24-72  | 1,819       | 1,965  | Standard                                               |      |
| 1374 | United States of America | 1985-1986  | Coronary Artery Risk Development in Young Adults (CARDIA)                                    | Subnational                 | urban                 | 18-30                                 | 18-30  | 2,327       | 2,785  | Random-zero                                            |      |
| 1375 | United States of America | 1985-1986  | Established Populations for Epidemiologic Studies of the Elderly, 3rd Follow-up, East Boston | Community                   | urban                 | 68+                                   | 68+    | 1,002       | 1,709  | Standard                                               |      |
| 1376 | United States of America | 1985-1986  | Established Populations for Epidemiologic Studies of the Elderly, 3rd Follow-up, Iowa        | Subnational                 | both                  | 68+                                   | 68+    | 1,020       | 1,814  | Standard                                               |      |
| 1377 | United States of America | 1985-1986  | Established Populations for Epidemiologic Studies of the Elderly, 3rd Follow-up, New Haven   | Community                   | urban                 | 68+                                   | 68+    | 784         | 1,202  | Standard                                               |      |
| 1378 | United States of America | 1985-1986  | INTERSALT, Chicago                                                                           | Community                   | urban                 | 20-59                                 | 20-59  | 97          | 99     | Random-zero                                            |      |
| 1379 | United States of America | 1986       | INTERSALT, Goodman                                                                           | Community                   | urban                 | 20-59                                 | 20-59  | 192         | 192    | Random-zero                                            |      |
| 1380 | United States of America | 1986       | INTERSALT, Jackson                                                                           | Community                   | urban                 | 20-59                                 | 20-59  | 184         | 199    | Random-zero                                            |      |
| 1381 | United States of America | 1985-1986  | MONICA, Stanford                                                                             | Subnational                 | urban                 | 25-64                                 | 25-64  | 703         | 824    | Standard                                               |      |
| 1382 | United States of America | 1986-1987  | Established Populations for Epidemiologic Studies of the Elderly, Baseline, Duke             | Subnational                 | both                  | 65+                                   | 65+    | 1,372       | 2,521  | Standard                                               |      |
| 1383 | United States of America | 1985-1988  | Framingham Heart Study (FHS)                                                                 | Community                   | urban                 | 65-93                                 | 65-96  | 559         | 881    | Standard                                               |      |
| 1384 | United States of America | 1987-1989  | Atherosclerosis Risk in Communities Study (ARIC)                                             | Subnational                 | both                  | 44-66                                 | 44-66  | 8,153       | 6,784  | Random-zero                                            |      |
| 1385 | United States of America | 1987-1988  | Bogalusa Heart Study (BHS)                                                                   | Community                   | rural                 | 18-21                                 | 18-21  | 40          | 28     | Standard                                               |      |
| 1386 | United States of America | 1987-1988  | Coronary Artery Risk Development in Young Adults (CARDIA)                                    | Subnational                 | urban                 | 20-32                                 | 20-32  | 2,089       | 2,531  | Random-zero                                            |      |
| 1387 | United States of America | 1986-1990  | Framingham Heart Study (FHS)                                                                 | Community                   | urban                 | 68-95                                 | 67-97  | 499         | 802    | Standard                                               |      |
| 1388 | United States of America | 1988-1989  | Established Populations for Epidemiologic Studies of the Elderly, 6th Follow-up, East Boston | Community                   | urban                 | 71+                                   | 71+    | 617         | 1,193  | Standard                                               |      |
| 1389 | United States of America | 1988-1989  | Established Populations for Epidemiologic Studies of the Elderly, 6th Follow-up, Iowa        | Subnational                 | both                  | 71+                                   | 71+    | 757         | 1,428  | Standard                                               |      |
| 1390 | United States of America | 1988-1989  | Established Populations for Epidemiologic Studies of the Elderly, 6th Follow-up, New Haven   | Community                   | urban                 | 71+                                   | 71+    | 520         | 906    | Standard                                               |      |
| 1391 | United States of America | 1987-1991  | Framingham Heart Study (FHS) - Offspring Cohort                                              | Community                   | urban                 | 28-76                                 | 28-76  | 1,886       | 2,039  | Standard                                               |      |
| 1392 | United States of America | 1989-1990  | Cardiovascular Health Study (CHS), baseline                                                  | Subnational                 | both                  | 65+                                   | 65+    | 2,449       | 3,299  | Random-zero                                            |      |
| 1393 | United States of America | 1989-1990  | Established Populations for Epidemiologic Studies of the Elderly, 3rd Follow-up, Duke        | Subnational                 | both                  | 68+                                   | 68+    | 1,018       | 2,084  | Standard                                               |      |
| 1394 | United States of America | 1988-1992  | Framingham Heart Study (FHS)                                                                 | Community                   | urban                 | 69-97                                 | 69-99  | 430         | 780    | Standard                                               |      |
| 1395 | United States of America | 1989-1990  | MONICA, Stanford                                                                             | Subnational                 | urban                 | 25-64                                 | 25-64  | 655         | 754    | Standard                                               |      |
| 1396 | United States of America | 1990-1992  | Atherosclerosis Risk in Communities Study (ARIC)                                             | Subnational                 | both                  | 46-70                                 | 47-70  | 7,414       | 6,121  | Random-zero                                            |      |
| 1397 | United States of America | 1990-1991  | Coronary Artery Risk Development in Young Adults (CARDIA)                                    | Subnational                 | urban                 | 23-35                                 | 23-35  | 1,958       | 2,389  | Random-zero                                            |      |
| 1398 | United States of America | 1988-1994  | US NHANES III                                                                                | National                    | both                  | 18+                                   | 18+    | 8,772       | 9,644  | Standard                                               |      |
| 1399 | United States of America | 1990-1994  | Framingham Heart Study (FHS)                                                                 | Community                   | urban                 | 72-99                                 | 72-101 | 367         | 692    | Standard                                               |      |
| 1400 | United States of America | 1992-1994  | Bogalusa Heart Study (BHS)                                                                   | Community                   | rural                 | 18-20                                 | 18-20  | 53          | 35     | Standard                                               |      |
| 1401 | United States of America | 1992-1993  | Coronary Artery Risk Development in Young Adults (CARDIA)                                    | Subnational                 | urban                 | 25-37                                 | 25-37  | 1,836       | 2,246  | Random-zero                                            |      |
| 1402 | United States of America | 1992-1993  | Cardiovascular Health Study (CHS)                                                            | Subnational                 | both                  | 67+                                   | 67+    | 2,010       | 2,637  | Random-zero                                            |      |
| 1403 | United States of America | 1992-1993  | Established Populations for Epidemiologic Studies of the Elderly, 6th Follow-up, Duke        | Subnational                 | both                  | 71+                                   | 71+    | 755         | 1,620  | Standard                                               |      |
| 1404 | United States of America | 1991-1995  | Framingham Heart Study (FHS) - Offspring Cohort                                              | Community                   | urban                 | 31-78                                 | 31-78  | 1,742       | 1,969  | Standard                                               |      |
| 1405 | United States of America | 1993-1995  | Atherosclerosis Risk in Communities Study (ARIC)                                             | Subnational                 | both                  | 50-73                                 | 49-73  | 6,587       | 5,528  | Random-zero                                            |      |
| 1406 | United States of America | 1993-1994  | Cardiovascular Health Study (CHS)                                                            | Subnational                 | both                  | 65+                                   | 65+    | 1,935       | 2,583  | Random-zero                                            |      |
| 1407 | United States of America | 1992-1996  | Framingham Heart Study (FHS)                                                                 | Community                   | urban                 | 74-97                                 | 73-101 | 305         | 608    | Standard                                               |      |
| 1408 | United States of America | 1994-1995  | Cardiovascular Health Study (CHS)                                                            | Subnational                 | both                  | 66-90                                 | 66-90  | 1,787       | 2,435  | Random-zero                                            |      |
| 1409 | United States of America | 1995-1996  | Bogalusa Heart Study (BHS)                                                                   | Community                   | rural                 | 20-37                                 | 20-37  | 549         | 843    | Standard                                               |      |

|      | Country                  | Data years | Survey/Study name/Citation                                                                                                   | Level of representativeness | Rural, urban, or both | Age range as used for global analysis |        | Sample size |        | Type of blood pressure measurement device <sup>1</sup> | Note |
|------|--------------------------|------------|------------------------------------------------------------------------------------------------------------------------------|-----------------------------|-----------------------|---------------------------------------|--------|-------------|--------|--------------------------------------------------------|------|
|      |                          |            |                                                                                                                              |                             |                       | Male                                  | Female | Male        | Female |                                                        |      |
| 1410 | United States of America | 1995-1996  | Coronary Artery Risk Development in Young Adults (CARDIA)                                                                    | Subnational                 | urban                 | 28-40                                 | 28-40  | 1,754       | 2,182  | Random-zero                                            |      |
| 1411 | United States of America | 1995-1996  | Cardiovascular Health Study (CHS)                                                                                            | Subnational                 | both                  | 66+                                   | 66+    | 1,830       | 2,603  | Random-zero                                            |      |
| 1412 | United States of America | 1993-1998  | Women's Health Initiative Study (WHI OS)                                                                                     | National                    | both                  |                                       | 50-79  |             | 93,545 | Standard                                               |      |
| 1413 | United States of America | 1996-1998  | Atherosclerosis Risk in Communities Study (ARIC)                                                                             | Subnational                 | both                  | 53-75                                 | 52-75  | 6,020       | 4,880  | Random-zero                                            |      |
| 1414 | United States of America | 1996-1997  | Cardiovascular Health Study (CHS)                                                                                            | Subnational                 | both                  | 67+                                   | 67+    | 1,701       | 2,523  | Random-zero                                            |      |
| 1415 | United States of America | 1995-1998  | Framingham Heart Study (FHS)                                                                                                 | Community                   | urban                 | 76-95                                 | 76-103 | 236         | 475    | Standard                                               |      |
| 1416 | United States of America | 1995-1998  | Framingham Heart Study (FHS) - Offspring Cohort                                                                              | Community                   | urban                 | 37-80                                 | 37-80  | 1,603       | 1,829  | Standard                                               |      |
| 1417 | United States of America | 1996-1997  | INTERMAP, Baltimore                                                                                                          | Community                   | urban                 | 40-59                                 | 40-59  | 146         | 134    | Random-zero                                            |      |
| 1418 | United States of America | 1997-1998  | INTERMAP, CC                                                                                                                 | Community                   | urban                 | 40-59                                 | 40-59  | 271         | 276    | Random-zero                                            |      |
| 1419 | United States of America | 1997-1998  | INTERMAP, Chicago                                                                                                            | Community                   | urban                 | 40-59                                 | 40-59  | 156         | 159    | Random-zero                                            |      |
| 1420 | United States of America | 1996-1997  | INTERMAP, Jackson                                                                                                            | Community                   | urban                 | 40-59                                 | 40-59  | 132         | 134    | Random-zero                                            |      |
| 1421 | United States of America | 1996-1998  | INTERMAP, Minneapolis                                                                                                        | Community                   | urban                 | 40-59                                 | 40-59  | 130         | 130    | Random-zero                                            |      |
| 1422 | United States of America | 1996-1997  | INTERMAP, Pittsburgh                                                                                                         | Community                   | urban                 | 40-59                                 | 40-59  | 132         | 128    | Random-zero                                            |      |
| 1423 | United States of America | 1996-1997  | Study of Women's Health Across the Nation                                                                                    | National                    | both                  |                                       | 40-55  |             | 3,233  | Standard                                               |      |
| 1424 | United States of America | 1997-1999  | Framingham Heart Study (FHS)                                                                                                 | Community                   | urban                 | 78-98                                 | 78-104 | 215         | 450    | Standard                                               |      |
| 1425 | United States of America | 1997-1999  | Study of Women's Health Across the Nation                                                                                    | National                    | both                  |                                       | 40-55  |             | 2,840  | Standard                                               |      |
| 1426 | United States of America | 1998-1999  | Cardiovascular Health Study (CHS)                                                                                            | Subnational                 | both                  | 69+                                   | 69+    | 1,406       | 2,158  | Random-zero                                            |      |
| 1427 | United States of America | 1998-2000  | Study of Women's Health Across the Nation                                                                                    | National                    | both                  |                                       | 40-55  |             | 2,661  | Standard                                               |      |
| 1428 | United States of America | 1999-2000  | Cardiovascular Health Study (CHS)                                                                                            | Subnational                 | both                  | 70+                                   | 70+    | 1,288       | 2,024  | Random-zero                                            |      |
| 1429 | United States of America | 1999-2001  | Framingham Heart Study (FHS)                                                                                                 | Community                   | urban                 | 80-96                                 | 80-103 | 153         | 335    | Standard                                               |      |
| 1430 | United States of America | 1998-2001  | Framingham Heart Study (FHS) - Offspring Cohort                                                                              | Community                   | urban                 | 37-89                                 | 33-90  | 1,601       | 1,887  | Standard                                               |      |
| 1431 | United States of America | 1999-2000  | US NHANES                                                                                                                    | National                    | both                  | 18+                                   | 18+    | 2,272       | 2,251  | Standard                                               |      |
| 1432 | United States of America | 1999-2001  | Study of Women's Health Across the Nation                                                                                    | National                    | both                  |                                       | 40-56  |             | 2,526  | Standard                                               |      |
| 1433 | United States of America | 2000-2001  | Coronary Artery Risk Development in Young Adults (CARDIA)                                                                    | Subnational                 | urban                 | 33-45                                 | 33-45  | 1,614       | 2,043  | Random-zero                                            |      |
| 1434 | United States of America | 2000-2001  | Cardiovascular Health Study (CHS)                                                                                            | Subnational                 | both                  | 71+                                   | 71+    | 1,185       | 1,900  | Random-zero                                            |      |
| 1435 | United States of America | 2000-2002  | Multi-Ethnic Study of Atherosclerosis (MESA)                                                                                 | Subnational                 | both                  | 45-84                                 | 45-84  | 3,210       | 3,596  | Digital                                                |      |
| 1436 | United States of America | 2000-2002  | Study of Women's Health Across the Nation                                                                                    | National                    | both                  |                                       | 40-57  |             | 2,457  | Standard                                               |      |
| 1437 | United States of America | 2001-2002  | US NHANES                                                                                                                    | National                    | both                  | 18+                                   | 18+    | 2,545       | 2,415  | Standard                                               |      |
| 1438 | United States of America | 2002-2003  | Framingham Heart Study (FHS)                                                                                                 | Community                   | urban                 | 83-99                                 | 83-106 | 116         | 269    | Standard                                               |      |
| 1439 | United States of America | 2002-2004  | Multi-Ethnic Study of Atherosclerosis (MESA)                                                                                 | Subnational                 | both                  | 46-87                                 | 46-86  | 2,969       | 3,261  | Digital                                                |      |
| 1440 | United States of America | 2002-2005  | Framingham Heart Study (FHS) - Third Generation Cohort                                                                       | Community                   | urban                 | 19-72                                 | 19-70  | 1,903       | 2,173  | Standard                                               |      |
| 1441 | United States of America | 2003-2004  | US NHANES                                                                                                                    | National                    | both                  | 18+                                   | 18+    | 2,388       | 2,289  | Standard                                               |      |
| 1442 | United States of America | 2004-2005  | Framingham Heart Study (FHS)                                                                                                 | Community                   | urban                 | 85-101                                | 85-102 | 91          | 188    | Standard                                               |      |
| 1443 | United States of America | 2004-2005  | Multi-Ethnic Study of Atherosclerosis (MESA)                                                                                 | Subnational                 | both                  | 47-88                                 | 47-87  | 2,809       | 3,128  | Digital                                                |      |
| 1444 | United States of America | 2005-2007  | Multi-Ethnic Study of Atherosclerosis (MESA)                                                                                 | Subnational                 | both                  | 49-90                                 | 49-89  | 2,691       | 3,008  | Digital                                                |      |
| 1445 | United States of America | 2005-2006  | US NHANES                                                                                                                    | National                    | both                  | 18+                                   | 18+    | 2,418       | 2,278  | Standard                                               |      |
| 1446 | United States of America | 2005-2006  | National Social Life Health and Aging Project                                                                                | National                    | both                  | 57-85                                 | 57-85  | 1,423       | 1,511  | Digital                                                |      |
| 1447 | United States of America | 2005-2008  | Framingham Heart Study (FHS) - Offspring Cohort                                                                              | Community                   | urban                 | 43-92                                 | 40-93  | 1,349       | 1,648  | Standard                                               |      |
| 1448 | United States of America | 2007-2008  | US NHANES                                                                                                                    | National                    | both                  | 18+                                   | 18+    | 2,815       | 2,828  | Standard                                               |      |
| 1449 | United States of America | 2008-2009  | National Longitudinal Study of Adolescent Health Wave IV                                                                     | National                    | both                  | 24-34                                 | 24-34  | 2,285       | 2,698  | Digital                                                |      |
| 1450 | United States of America | 2009-2010  | US NHANES                                                                                                                    | National                    | both                  | 18+                                   | 18+    | 2,975       | 3,029  | Standard                                               |      |
| 1451 | United States of America | 2010-2011  | National Social Life Health and Aging Project                                                                                | National                    | both                  | 50-99                                 | 36-99  | 1,485       | 1,791  | Digital                                                |      |
| 1452 | United States of America | 2011-2012  | US NHANES                                                                                                                    | National                    | both                  | 18+                                   | 18+    | 2,676       | 2,627  | Standard                                               |      |
| 1453 | United States of America | 2013-2014  | US NHANES                                                                                                                    | National                    | both                  | 18+                                   | 18+    | 2,737       | 2,915  | Standard                                               |      |
| 1454 | Uruguay                  | 2006       | STEPS                                                                                                                        | National                    | both                  | 25-64                                 | 25-64  | 261         | 644    | Digital                                                |      |
| 1455 | Uruguay                  | 2011-2012  | Detection and follow-up of cardiovascular disease and risk factors in the Southern Cone of Latin America. The CESCAS I Study | Community                   | urban                 | 35-74                                 | 35-74  | 652         | 932    | Standard                                               |      |
| 1456 | Uruguay                  | 2012-2016  | Genotype, Phenotype and Environment of Hypertension in Uruguay (GEFA-HT-UY)                                                  | Community                   | urban                 | 19+                                   | 20+    | 128         | 190    | Standard                                               |      |
| 1457 | Uzbekistan               | 2002       | DHS                                                                                                                          | National                    | both                  | 18-59                                 | 18-49  | 2,060       | 4,530  | Standard                                               |      |
| 1458 | Uzbekistan               | 2014       | STEPS                                                                                                                        | National                    | both                  | 18-64                                 | 18-64  | 1,539       | 2,170  | Digital                                                |      |
| 1459 | Vanuatu                  | 1998       | 1998 Vanuatu Non-Communicable Disease Survey                                                                                 | National                    | both                  | 20-59                                 | 20-59  | 734         | 735    | Unknown                                                |      |
| 1460 | Vanuatu                  | 2005       | STEPS                                                                                                                        | Subnational                 | both                  | 18-60                                 | 18-60  | 588         | 705    | Digital                                                |      |
| 1461 | Vanuatu                  | 2011       | STEPS                                                                                                                        | National                    | both                  | 25-64                                 | 25-64  | 2,283       | 2,205  | Digital                                                |      |
| 1462 | Venezuela                | 1998       | Sulbaran et al., J Hum Hypertens 2000; 14 Suppl 1: S6-9                                                                      | Community                   | urban                 | 20-59                                 | 20-59  | 3,272       | 3,368  | Unknown                                                |      |
| 1463 | Venezuela                | 2000       | Zulia Coronary Heart Disease Risk Factor Study; Florez et al., Diabetes Res Clin Pract 2005; 69: 63-77                       | Subnational                 | both                  | 25+                                   | 25+    | 1,281       | 2,900  | Unknown                                                |      |
| 1464 | Venezuela                | 2004-2005  | CARDIOVASCULAR Risk factors Multiple Evaluation in Latin America (CARMELA)                                                   | Community                   | urban                 | 25-64                                 |        | 713         |        | Standard                                               |      |
| 1465 | Venezuela                | 2005-2006  | Brajkovich et al., Rev Ven Endoc Metab 2006; 4: 31-2                                                                         | Community                   | urban                 | 20-65                                 | 20-65  | 200         | 432    | Standard                                               |      |

|      | Country   | Data years | Survey/Study name/Citation                                                            | Level of representativeness | Rural, urban, or both | Age range as used for global analysis |        | Sample size |        | Type of blood pressure measurement device <sup>1</sup> | Note |
|------|-----------|------------|---------------------------------------------------------------------------------------|-----------------------------|-----------------------|---------------------------------------|--------|-------------|--------|--------------------------------------------------------|------|
|      |           |            |                                                                                       |                             |                       | Male                                  | Female | Male        | Female |                                                        |      |
| 1466 | Venezuela | 2007-2008  | Venezuelan Study of Metabolic Syndrome, Obesity and Lifestyle (VEMSOLS)               | Community                   | urban                 | 20-79                                 | 20+    | 107         | 231    | Standard                                               |      |
| 1467 | Venezuela | 2008-2009  | Venezuelan Study of Metabolic Syndrome, Obesity and Lifestyle (VEMSOLS)               | Community                   | rural                 | 20+                                   | 20-79  | 51          | 87     | Standard                                               |      |
| 1468 | Venezuela | 2010-2011  | Venezuelan Study of Metabolic Syndrome, Obesity and Lifestyle (VEMSOLS)               | Community                   | urban                 | 20+                                   | 20+    | 66          | 193    | Standard                                               |      |
| 1469 | Viet Nam  | 2001-2002  | Vietnam National Health Survey                                                        | National                    | both                  | 18+                                   | 18+    | 42,814      | 49,431 | Standard                                               |      |
| 1470 | Viet Nam  | 2005       | National Adult Overweight Survey                                                      | National                    | both                  | 25-64                                 | 25-64  | 8,474       | 8,725  | Standard                                               |      |
| 1471 | Viet Nam  | 2005       | Non-communicable disease risk factors in Ho Chi Minh City                             | Community                   | both                  | 25-64                                 | 25-64  | 906         | 1,058  | Digital                                                |      |
| 1472 | Viet Nam  | 2008-2009  | The survey on diabetes and its risk factors in 2 northern provinces of Vietnam (DM-S) | Subnational                 | both                  | 25+                                   | 25+    | 830         | 1,446  | Digital                                                |      |
| 1473 | Viet Nam  | 2009       | STEPS                                                                                 | National                    | both                  | 25-64                                 | 25-64  | 6,740       | 7,807  | Digital                                                |      |
| 1474 | Zambia    | 1999       | CD4 Survey; Kelly et al., Acta Trop 2002; 83: 151-8                                   | Community                   | urban                 | 25-74                                 | 25-74  | 129         | 215    | Unknown                                                |      |
| 1475 | Zambia    | 2008       | STEPS                                                                                 | Community                   | urban                 | 25+                                   | 25+    | 632         | 1,220  | Digital                                                |      |
| 1476 | Zimbabwe  | 1985-1986  | INTERSALT                                                                             | Community                   | urban                 | 20-59                                 | 20-59  | 100         | 95     | Random-zero                                            |      |
| 1477 | Zimbabwe  | 1993       | Matenga et al., S Afr Med J 1997; 87: 1371-3                                          | Community                   | both                  | 60+                                   | 60+    | 121         | 209    | Unknown                                                |      |
| 1478 | Zimbabwe  | 1995       | Mufunda et al., J Hum Hypertens 2000; 14: 65-73                                       | Community                   | both                  | 25-54                                 | 25-54  | 284         | 298    | Unknown                                                |      |
| 1479 | Zimbabwe  | 2005       | STEPS                                                                                 | National                    | both                  | 25+                                   | 25+    | 574         | 1,829  | Digital                                                |      |

1. Blood pressure measurement devices include:

'Standard': standard mercury sphygmomanometer or aneroid sphygmomanometer; 'Random-zero': random-zero mercury sphygmomanometer; 'Digital': digital oscillometric device; 'Unknown': information unavailable or multiple types of devices used.

2. The first age group started from <18 years old, but had a mean age ≥18 years.

3. This research uses data from China Health and Nutrition Survey (CHNS). We thank the National Institute of Nutrition and Food Safety, China Center for Disease Control and Prevention, Carolina Population Center (5 R24 HD050924), the University of North Carolina at Chapel Hill, the NIH (R01-HD30880, DK056350, R24-HD050924, and R01-HD38700) and the Fogarty International Center, NIH for financial support for the CHNS data collection and analysis files from 1989 to 2011 and future surveys, and the China-Japan Friendship Hospital, Ministry of Health for support for CHNS 2009.

4. National study conducted between 1972 and 1974, included in the analysis as a 1975 study.

**Appendix Table 3:** Model specifications and regression coefficients to estimate the primary outcomes (mean SBP, mean DBP, and prevalence of raised blood pressure defined by SBP  $\geq 140$  mmHg or DBP  $\geq 90$  mmHg) from other metrics.

The dependent variable in all regressions was inverse of means or prevalence, fitted using a linear (mixed) model for means and a generalized linear (mixed) model with a probit link function for prevalence. Random effects for regions are presented.

\* denotes statistical interaction. CI: confidence interval.

| <b>Primary outcome: mean SBP</b>                                                                        |                               |
|---------------------------------------------------------------------------------------------------------|-------------------------------|
| <b>Independent variable: prevalence (SBP <math>\geq</math>140 mmHg or DBP <math>\geq</math>90 mmHg)</b> |                               |
| <b>Variables</b>                                                                                        | <b>Coefficients (95% CI)</b>  |
| Intercept                                                                                               | 0.0074 (0.0074, 0.0075)       |
| Probit-transformed prevalence (SBP $\geq$ 140 mmHg or DBP $\geq$ 90 mmHg)                               | -0.00095 (-0.00096, -0.00094) |
| Mean age of age group (centred at 50 years)                                                             | -6.2e-06 (-6.6e-06, -5.9e-06) |
| Male sex                                                                                                | 9.4e-06 (-3.1e-08, 1.9e-05)   |
| Study mid-year (per one more recent year since 1975)                                                    | -1.8e-06 (-2.3e-06, -1.4e-06) |
| Natural logarithm of per-capita gross domestic product                                                  | -5.8e-06 (-1.3e-05, 1.6e-06)  |
| Probit-transformed prevalence * mean age of age group                                                   | -5.5e-06 (-5.8e-06, -5.2e-06) |
| Probit-transformed prevalence * male sex                                                                | 0.00016 (0.00015, 0.00017)    |
| Random effects for regions                                                                              | Yes                           |
| <b>Number of data points used to fit the model = 10,517</b>                                             |                               |

Traditional  $R^2$  is not clearly defined for mixed-effect models. The conditional  $R^2$  for the model, which describes the proportion of variance explained by both fixed and random factors,<sup>11</sup> was 0.924.

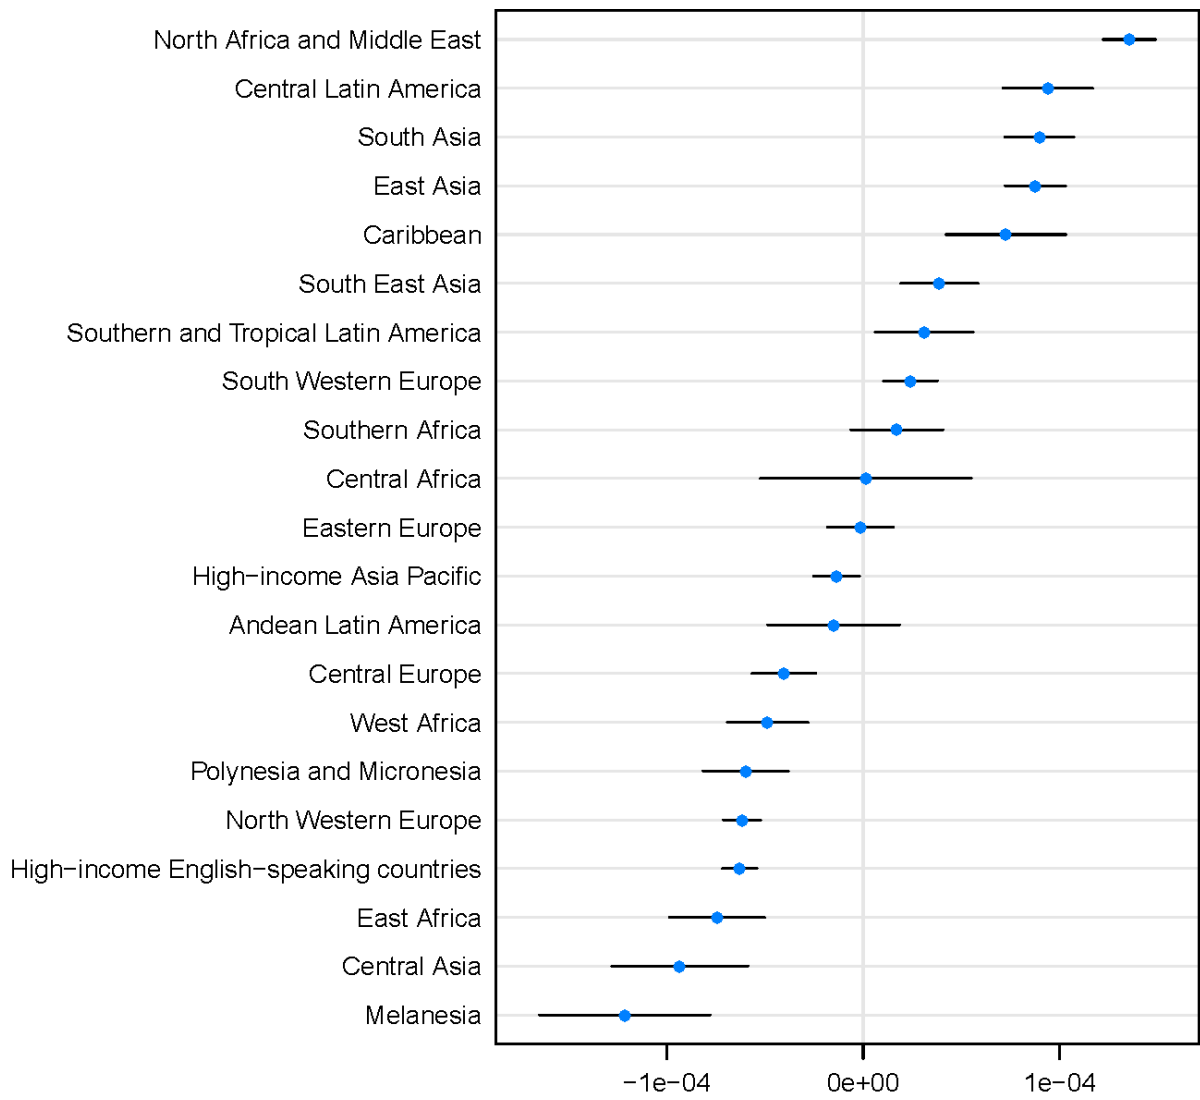



|                                                                         |                               |
|-------------------------------------------------------------------------|-------------------------------|
| <b>Primary outcome: mean SBP</b>                                        |                               |
| <b>Independent variable: prevalence (SBP <math>\geq</math>140 mmHg)</b> |                               |
| <b>Variables</b>                                                        | <b>Coefficients (95% CI)</b>  |
| Intercept                                                               | 0.0073 (0.0072, 0.0074)       |
| Probit-transformed prevalence (SBP $\geq$ 140 mmHg)                     | -0.00095 (-0.00096, -0.00094) |
| Mean age of age group (centred at 50 years)                             | -1.1e-06 (-1.5e-06, -8.0e-07) |
| Male sex                                                                | -2.3e-06 (-1.0e-05, 5.7e-06)  |
| Study mid-year (per one more recent year since 1975)                    | -1.5e-06 (-1.8e-06, -1.1e-06) |
| Natural logarithm of per-capita gross domestic product                  | -1.2e-05 (-1.8e-05, -6.0e-06) |
| Probit-transformed prevalence * mean age of age group                   | -4.2e-06 (-4.4e-06, -3.9e-06) |
| Probit-transformed prevalence * male sex                                | 0.00011 (0.00010, 0.00012)    |
| Random effects for regions                                              | Yes                           |
| <b>Number of data points used to fit the model = 10,558</b>             |                               |

Traditional  $R^2$  is not clearly defined for mixed-effect models. The conditional  $R^2$  for the model, which describes the proportion of variance explained by both fixed and random factors,<sup>11</sup> was 0.953.

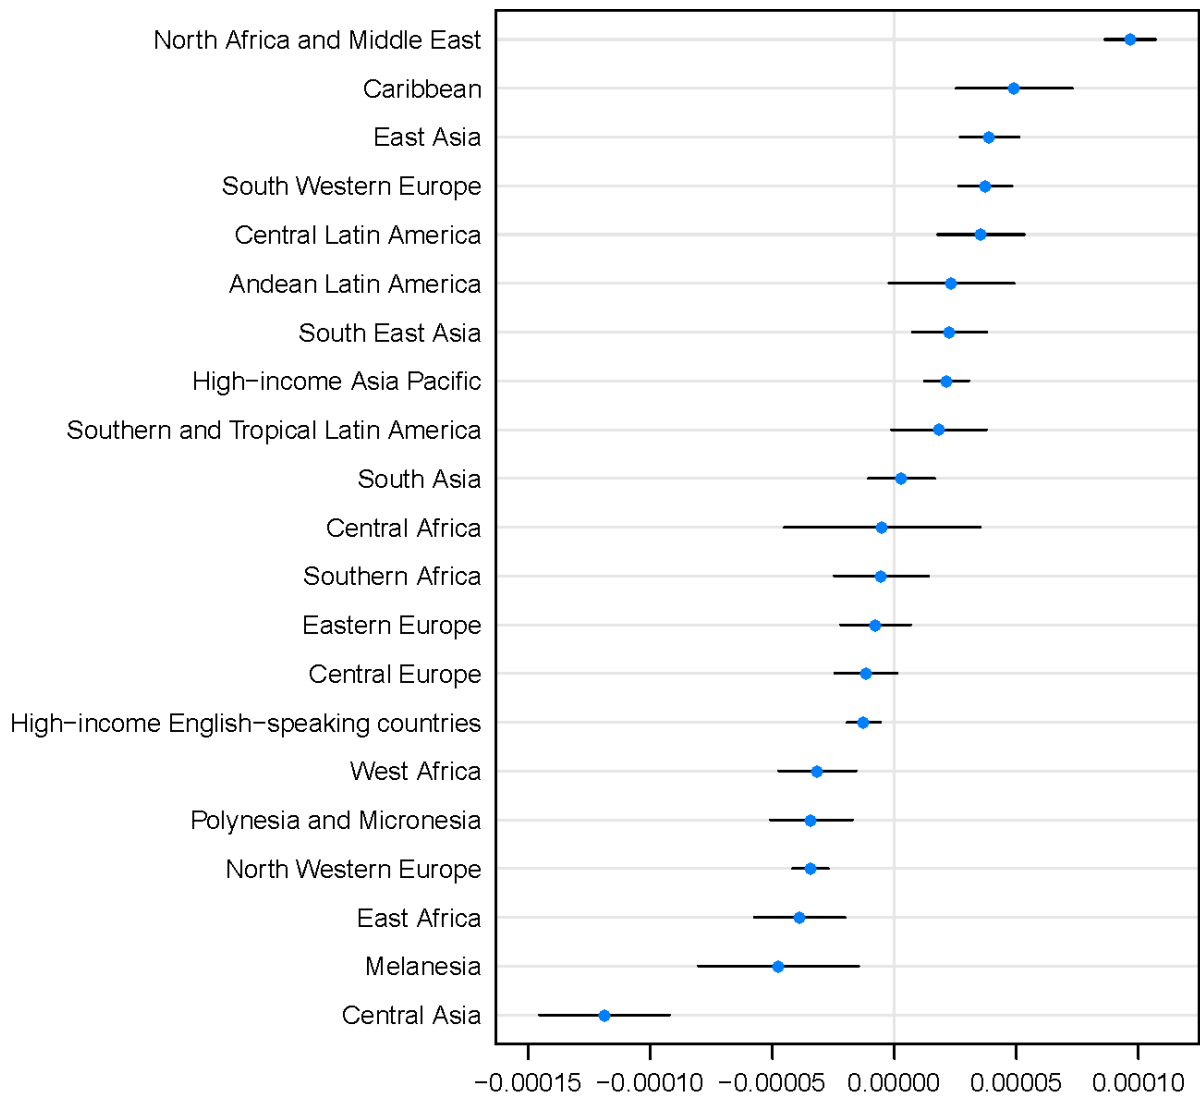

|                                                                                                                                               |                               |
|-----------------------------------------------------------------------------------------------------------------------------------------------|-------------------------------|
| <b>Primary outcome: mean SBP</b>                                                                                                              |                               |
| <b>Independent variable: prevalence (SBP <math>\geq</math>140 mmHg or DBP <math>\geq</math>90 mmHg or use of antihypertensive medication)</b> |                               |
| <b>Variables</b>                                                                                                                              | <b>Coefficients (95% CI)</b>  |
| Intercept                                                                                                                                     | 0.0072 (0.0071, 0.0073)       |
| Probit-transformed prevalence (SBP $\geq$ 140 mmHg or DBP $\geq$ 90 mmHg or use of antihypertensive medication)                               | -0.00086 (-0.00087, -0.00084) |
| Mean age of age group (centred at 50 years)                                                                                                   | -1.5e-06 (-2.1e-06, -8.5e-07) |
| Male sex                                                                                                                                      | -7.5e-05 (-8.7e-05, -6.4e-05) |
| Study mid-year (per one more recent year since 1975)                                                                                          | 3.7e-06 (3.0e-06, 4.3e-06)    |
| Natural logarithm of per-capita gross domestic product                                                                                        | 2.6e-05 (1.6e-05, 3.6e-05)    |
| Probit-transformed prevalence * mean age of age group                                                                                         | -2.4e-06 (-2.8e-06, -2.0e-06) |
| Probit-transformed prevalence * male sex                                                                                                      | 0.00014 (0.00013, 0.00016)    |
| Random effects for regions                                                                                                                    | Yes                           |
| <b>Number of data points used to fit the model = 9,141</b>                                                                                    |                               |

Traditional  $R^2$  is not clearly defined for mixed-effect models. The conditional  $R^2$  for the model, which describes the proportion of variance explained by both fixed and random factors,<sup>11</sup> was 0.873.

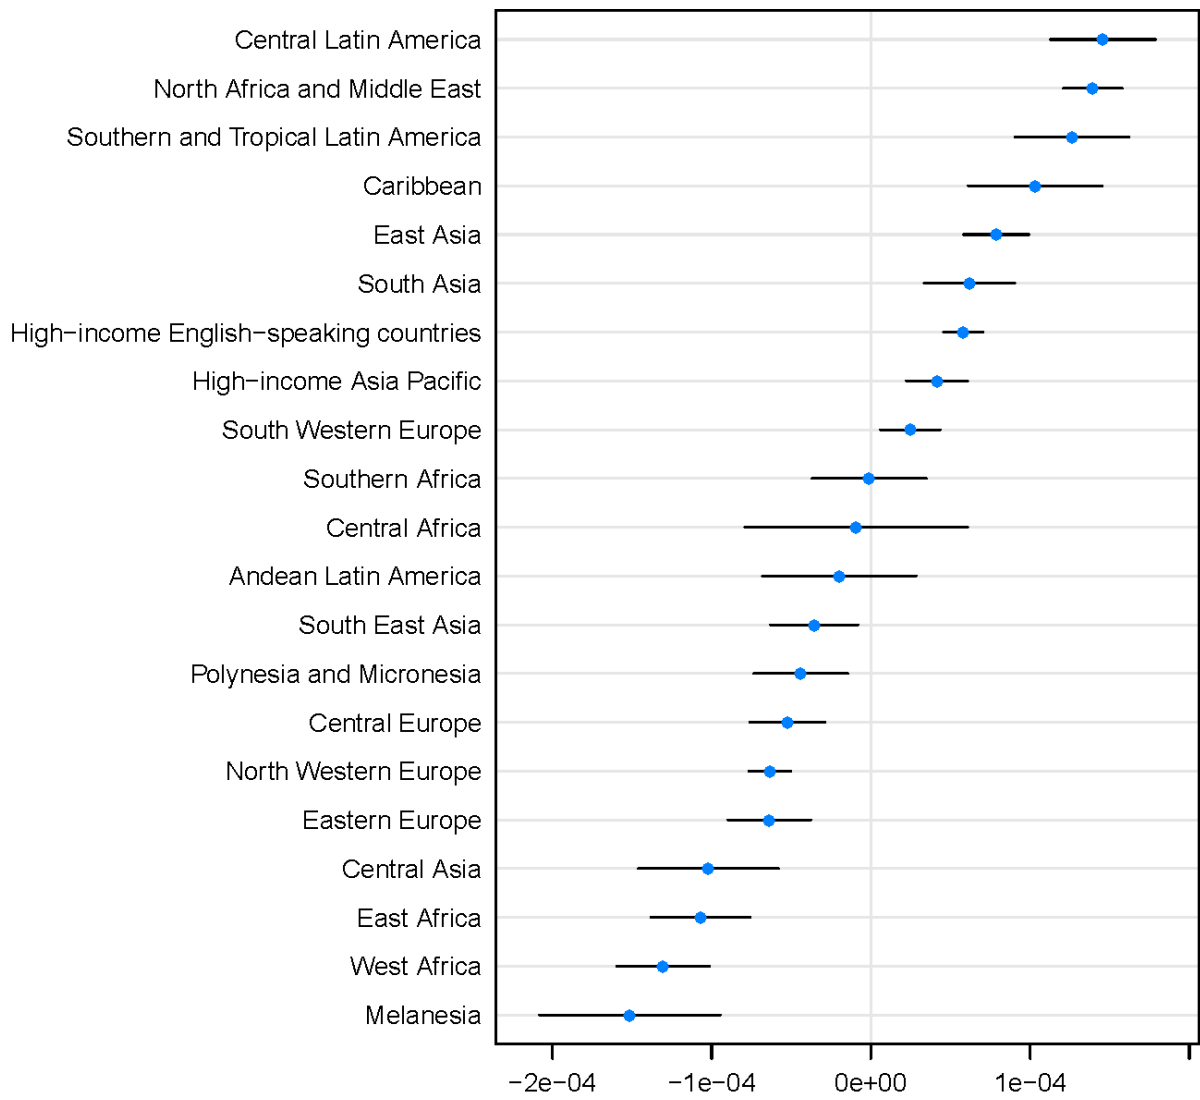

| <b>Primary outcome: mean SBP</b>                                                                                                              |                               |
|-----------------------------------------------------------------------------------------------------------------------------------------------|-------------------------------|
| <b>Independent variable: prevalence (SBP <math>\geq</math>160 mmHg or DBP <math>\geq</math>95 mmHg or use of antihypertensive medication)</b> |                               |
| <b>Variables</b>                                                                                                                              | <b>Coefficients (95% CI)</b>  |
| Intercept                                                                                                                                     | 0.0070 (0.0068, 0.0071)       |
| Probit-transformed prevalence (SBP $\geq$ 160 mmHg or DBP $\geq$ 95 mmHg or use of antihypertensive medication)                               | -0.00066 (-0.00068, -0.00064) |
| Mean age of age group (centred at 50 years)                                                                                                   | -1.1e-05 (-1.2e-05, -1.0e-05) |
| Male sex                                                                                                                                      | -2.2e-05 (-4.2e-05, -2.8e-06) |
| Study mid-year (per one more recent year since 1975)                                                                                          | 7.7e-06 (6.9e-06, 8.6e-06)    |
| Natural logarithm of per-capita gross domestic product                                                                                        | 1.9e-05 (6.2e-06, 3.2e-05)    |
| Probit-transformed prevalence * mean age of age group                                                                                         | -1.1e-06 (-1.6e-06, -5.6e-07) |
| Probit-transformed prevalence * male sex                                                                                                      | 0.00024 (0.00022, 0.00026)    |
| Random effects for regions                                                                                                                    | Yes                           |
| <b>Number of data points used to fit the model = 8,852</b>                                                                                    |                               |

Traditional  $R^2$  is not clearly defined for mixed-effect models. The conditional  $R^2$  for the model, which describes the proportion of variance explained by both fixed and random factors,<sup>11</sup> was 0.799.

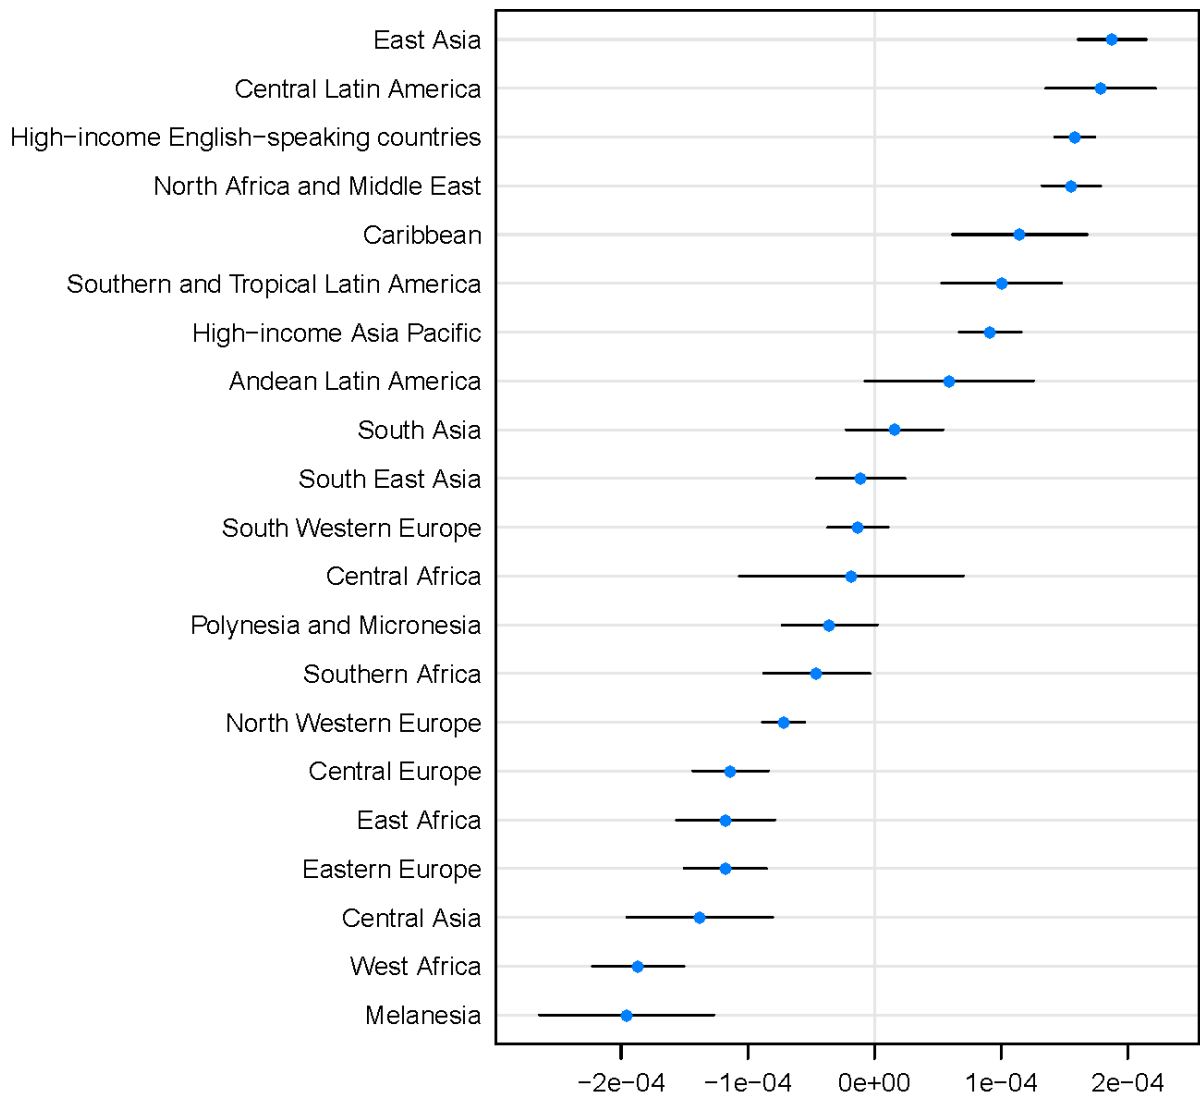

|                                                                                                         |                               |
|---------------------------------------------------------------------------------------------------------|-------------------------------|
| <b>Primary outcome: mean SBP</b>                                                                        |                               |
| <b>Independent variable: prevalence (SBP <math>\geq</math>130 mmHg or DBP <math>\geq</math>85 mmHg)</b> |                               |
| <b>Variables</b>                                                                                        | <b>Coefficients (95% CI)</b>  |
| Intercept                                                                                               | 0.0078 (0.0077, 0.0078)       |
| Probit-transformed prevalence (SBP $\geq$ 130 mmHg or DBP $\geq$ 85 mmHg)                               | -0.00094 (-0.00095, -0.00093) |
| Mean age of age group (centred at 50 years)                                                             | -4.5e-06 (-4.8e-06, -4.1e-06) |
| Male sex                                                                                                | -2.2e-05 (-3.0e-05, -1.4e-05) |
| Study mid-year (per one more recent year since 1975)                                                    | -1.1e-06 (-1.5e-06, -6.0e-07) |
| Natural logarithm of per-capita gross domestic product                                                  | 3.8e-06 (-3.6e-06, 1.1e-05)   |
| Probit-transformed prevalence * mean age of age group                                                   | -3.8e-06 (-4.2e-06, -3.5e-06) |
| Probit-transformed prevalence * male sex                                                                | 0.00012 (0.00010, 0.00013)    |
| Random effects for regions                                                                              | Yes                           |
| <b>Number of data points used to fit the model = 7,558</b>                                              |                               |

Traditional  $R^2$  is not clearly defined for mixed-effect models. The conditional  $R^2$  for the model, which describes the proportion of variance explained by both fixed and random factors,<sup>11</sup> was 0.948.

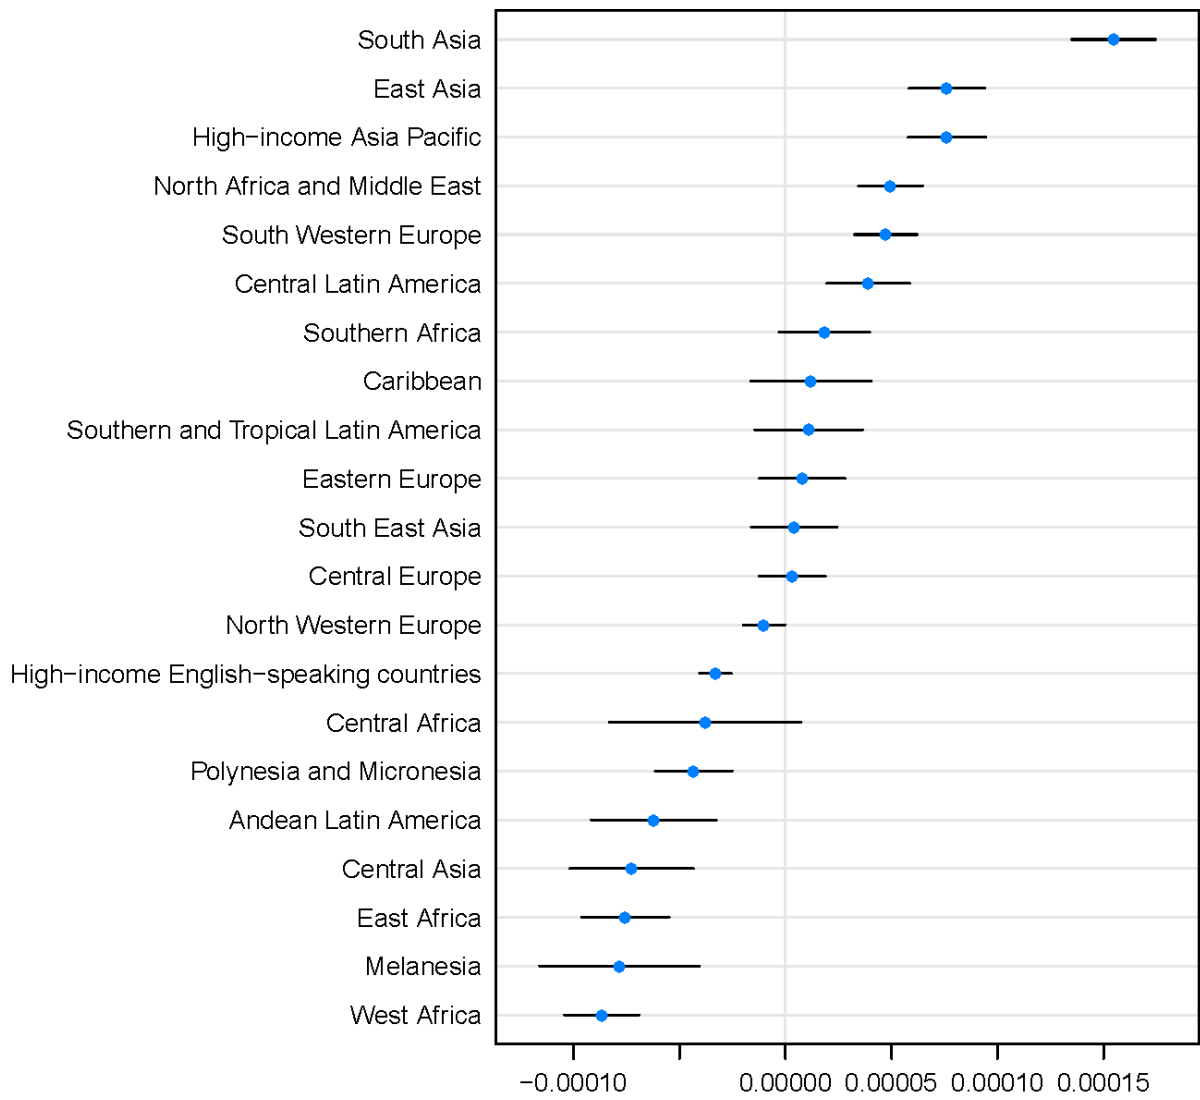



|                                                                                                         |                               |
|---------------------------------------------------------------------------------------------------------|-------------------------------|
| <b>Primary outcome: mean SBP</b>                                                                        |                               |
| <b>Independent variable: prevalence (SBP <math>\geq</math>150 mmHg or DBP <math>\geq</math>90 mmHg)</b> |                               |
| <b>Variables</b>                                                                                        | <b>Coefficients (95% CI)</b>  |
| Intercept                                                                                               | 0.0073 (0.0072, 0.0074)       |
| Probit-transformed prevalence (SBP $\geq$ 150 mmHg or DBP $\geq$ 90 mmHg)                               | -0.00091 (-0.00093, -0.00090) |
| Mean age of age group (centred at 50 years)                                                             | -1.6e-05 (-1.7e-05, -1.5e-05) |
| Male sex                                                                                                | 8.8e-05 (7.1e-05, 0.00011)    |
| Study mid-year (per one more recent year since 1975)                                                    | -3.1e-06 (-3.8e-06, -2.4e-06) |
| Natural logarithm of per-capita gross domestic product                                                  | -7.3e-07 (-1.2e-05, 1.0e-05)  |
| Probit-transformed prevalence * mean age of age group                                                   | -7.7e-06 (-8.2e-06, -7.2e-06) |
| Probit-transformed prevalence * male sex                                                                | 0.00027 (0.00025, 0.00029)    |
| Random effects for regions                                                                              | Yes                           |
| <b>Number of data points used to fit the model = 7,412</b>                                              |                               |

Traditional  $R^2$  is not clearly defined for mixed-effect models. The conditional  $R^2$  for the model, which describes the proportion of variance explained by both fixed and random factors,<sup>11</sup> was 0.884.

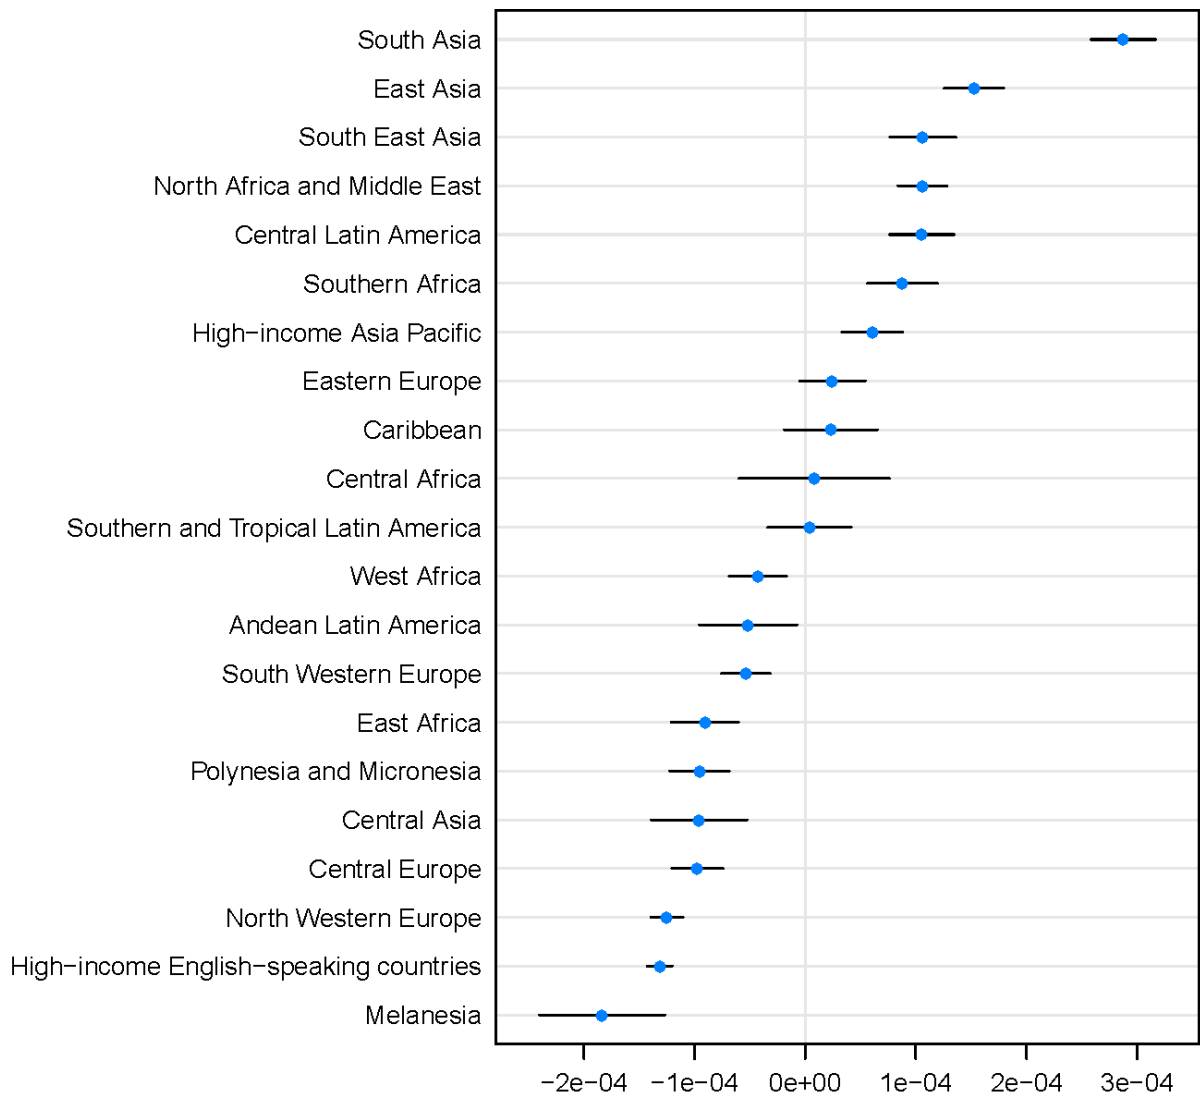

| <b>Primary outcome: mean SBP</b>                                                                        |                               |
|---------------------------------------------------------------------------------------------------------|-------------------------------|
| <b>Independent variable: prevalence (SBP <math>\geq</math>160 mmHg or DBP <math>\geq</math>90 mmHg)</b> |                               |
| <b>Variables</b>                                                                                        | <b>Coefficients (95% CI)</b>  |
| Intercept                                                                                               | 0.0073 (0.0072, 0.0074)       |
| Probit-transformed prevalence (SBP $\geq$ 160 mmHg or DBP $\geq$ 90 mmHg)                               | -0.00084 (-0.00086, -0.00082) |
| Mean age of age group (centred at 50 years)                                                             | -2.4e-05 (-2.5e-05, -2.3e-05) |
| Male sex                                                                                                | 0.00015 (0.00013, 0.00017)    |
| Study mid-year (per one more recent year since 1975)                                                    | -2.6e-06 (-3.4e-06, -1.8e-06) |
| Natural logarithm of per-capita gross domestic product                                                  | -4.9e-06 (-1.7e-05, 7.3e-06)  |
| Probit-transformed prevalence * mean age of age group                                                   | -8.6e-06 (-9.2e-06, -7.9e-06) |
| Probit-transformed prevalence * male sex                                                                | 0.00032 (0.00030, 0.00034)    |
| Random effects for regions                                                                              | Yes                           |
| <b>Number of data points used to fit the model = 7,389</b>                                              |                               |

Traditional  $R^2$  is not clearly defined for mixed-effect models. The conditional  $R^2$  for the model, which describes the proportion of variance explained by both fixed and random factors,<sup>11</sup> was 0.856.

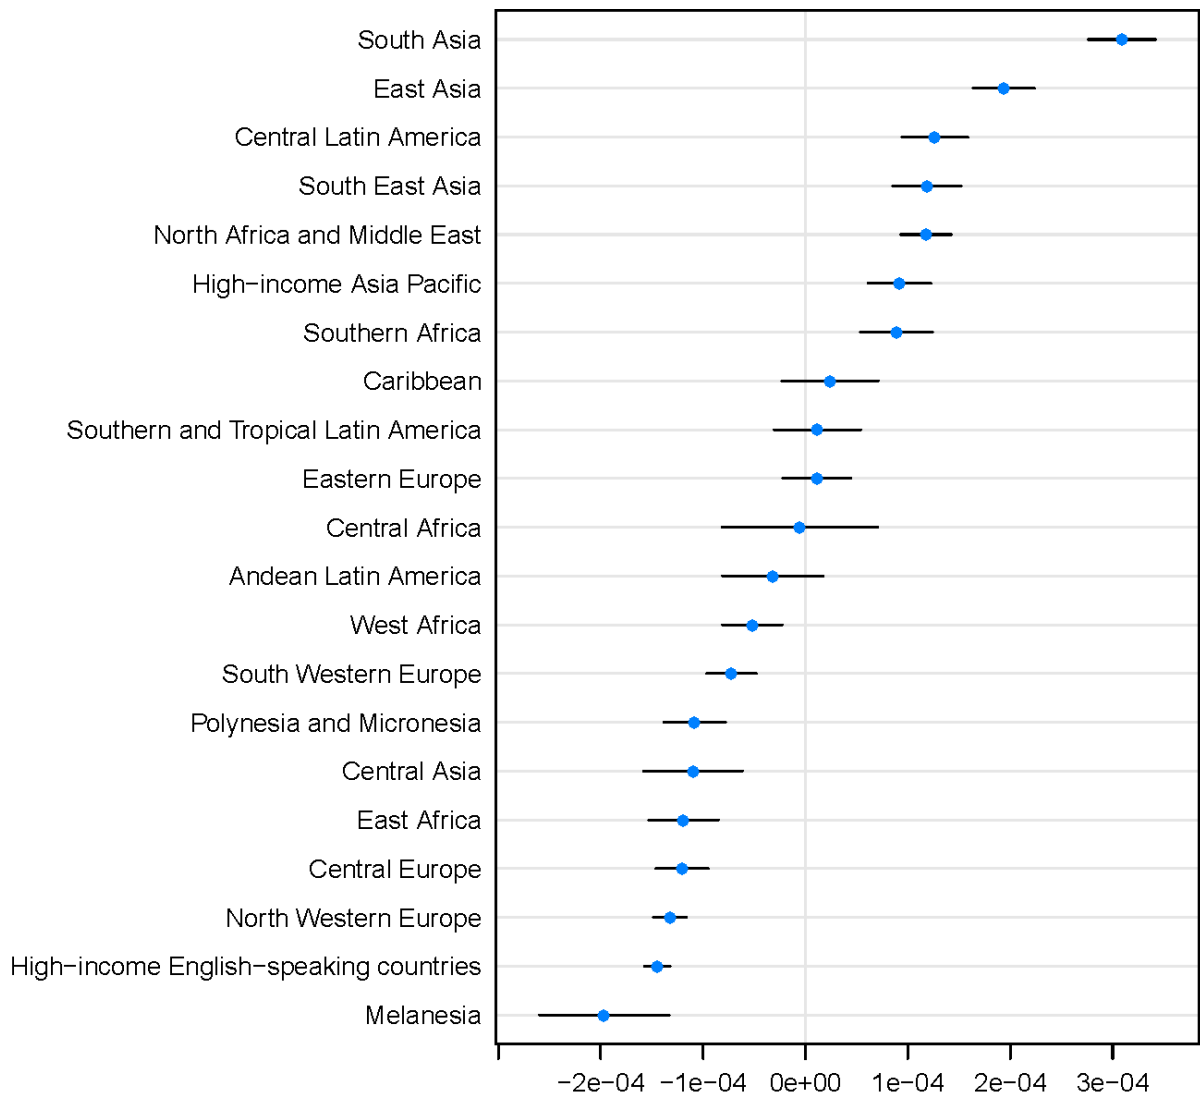

|                                                                                                         |                               |
|---------------------------------------------------------------------------------------------------------|-------------------------------|
| <b>Primary outcome: mean SBP</b>                                                                        |                               |
| <b>Independent variable: prevalence (SBP <math>\geq</math>160 mmHg or DBP <math>\geq</math>95 mmHg)</b> |                               |
| <b>Variables</b>                                                                                        | <b>Coefficients (95% CI)</b>  |
| Intercept                                                                                               | 0.0069 (0.0068, 0.0070)       |
| Probit-transformed prevalence (SBP $\geq$ 160 mmHg or DBP $\geq$ 95 mmHg)                               | -0.00092 (-0.00093, -0.00090) |
| Mean age of age group (centred at 50 years)                                                             | -1.9e-05 (-2.0e-05, -1.8e-05) |
| Male sex                                                                                                | 0.00019 (0.00017, 0.00022)    |
| Study mid-year (per one more recent year since 1975)                                                    | -2.0e-06 (-2.7e-06, -1.3e-06) |
| Natural logarithm of per-capita gross domestic product                                                  | 5.3e-07 (-1.0e-05, 1.1e-05)   |
| Probit-transformed prevalence * mean age of age group                                                   | -7.5e-06 (-8.0e-06, -6.9e-06) |
| Probit-transformed prevalence * male sex                                                                | 0.00028 (0.00026, 0.00030)    |
| Random effects for regions                                                                              | Yes                           |
| <b>Number of data points used to fit the model = 7,477</b>                                              |                               |

Traditional  $R^2$  is not clearly defined for mixed-effect models. The conditional  $R^2$  for the model, which describes the proportion of variance explained by both fixed and random factors,<sup>11</sup> was 0.876.

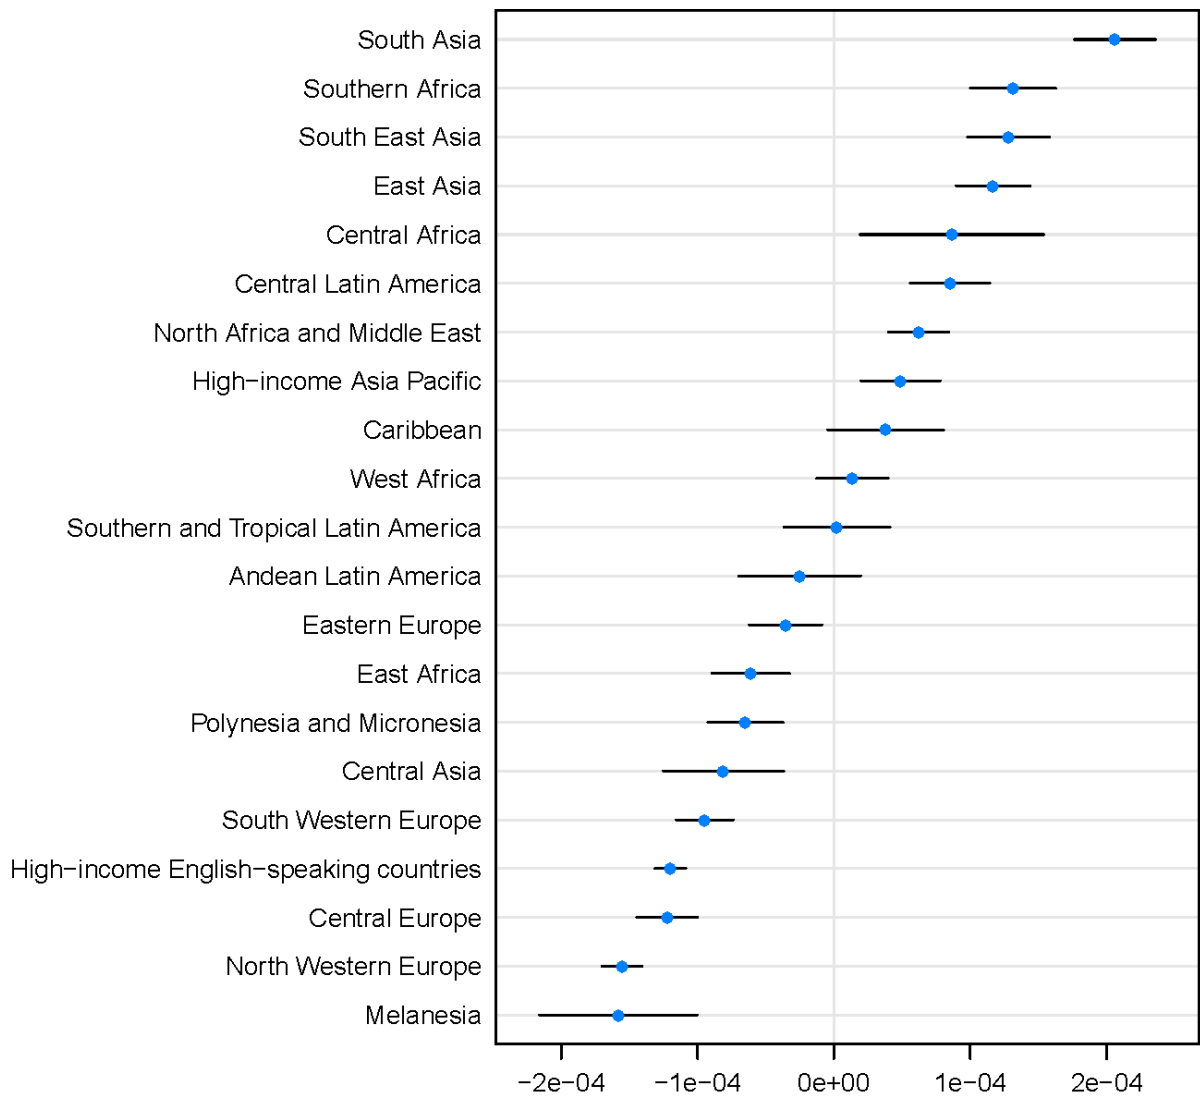

|                                                                                                                                               |                               |
|-----------------------------------------------------------------------------------------------------------------------------------------------|-------------------------------|
| <b>Primary outcome: mean SBP</b>                                                                                                              |                               |
| <b>Independent variable: prevalence (SBP <math>\geq</math>130 mmHg or DBP <math>\geq</math>85 mmHg or use of antihypertensive medication)</b> |                               |
| <b>Variables</b>                                                                                                                              | <b>Coefficients (95% CI)</b>  |
| Intercept                                                                                                                                     | 0.0076 (0.0075, 0.0076)       |
| Probit-transformed prevalence (SBP $\geq$ 130 mmHg or DBP $\geq$ 85 mmHg or use of antihypertensive medication)                               | -0.00090 (-0.00091, -0.00088) |
| Mean age of age group (centred at 50 years)                                                                                                   | -5.7e-07 (-1.1e-06, -2.5e-09) |
| Male sex                                                                                                                                      | -6.0e-05 (-7.1e-05, -4.9e-05) |
| Study mid-year (per one more recent year since 1975)                                                                                          | 2.2e-06 (1.5e-06, 2.8e-06)    |
| Natural logarithm of per-capita gross domestic product                                                                                        | 2.9e-05 (1.9e-05, 3.9e-05)    |
| Probit-transformed prevalence * mean age of age group                                                                                         | -1.6e-06 (-2.1e-06, -1.2e-06) |
| Probit-transformed prevalence * male sex                                                                                                      | 9.7e-05 (8.2e-05, 0.00011)    |
| Random effects for regions                                                                                                                    | Yes                           |
| <b>Number of data points used to fit the model = 6,346</b>                                                                                    |                               |

Traditional  $R^2$  is not clearly defined for mixed-effect models. The conditional  $R^2$  for the model, which describes the proportion of variance explained by both fixed and random factors,<sup>11</sup> was 0.912.

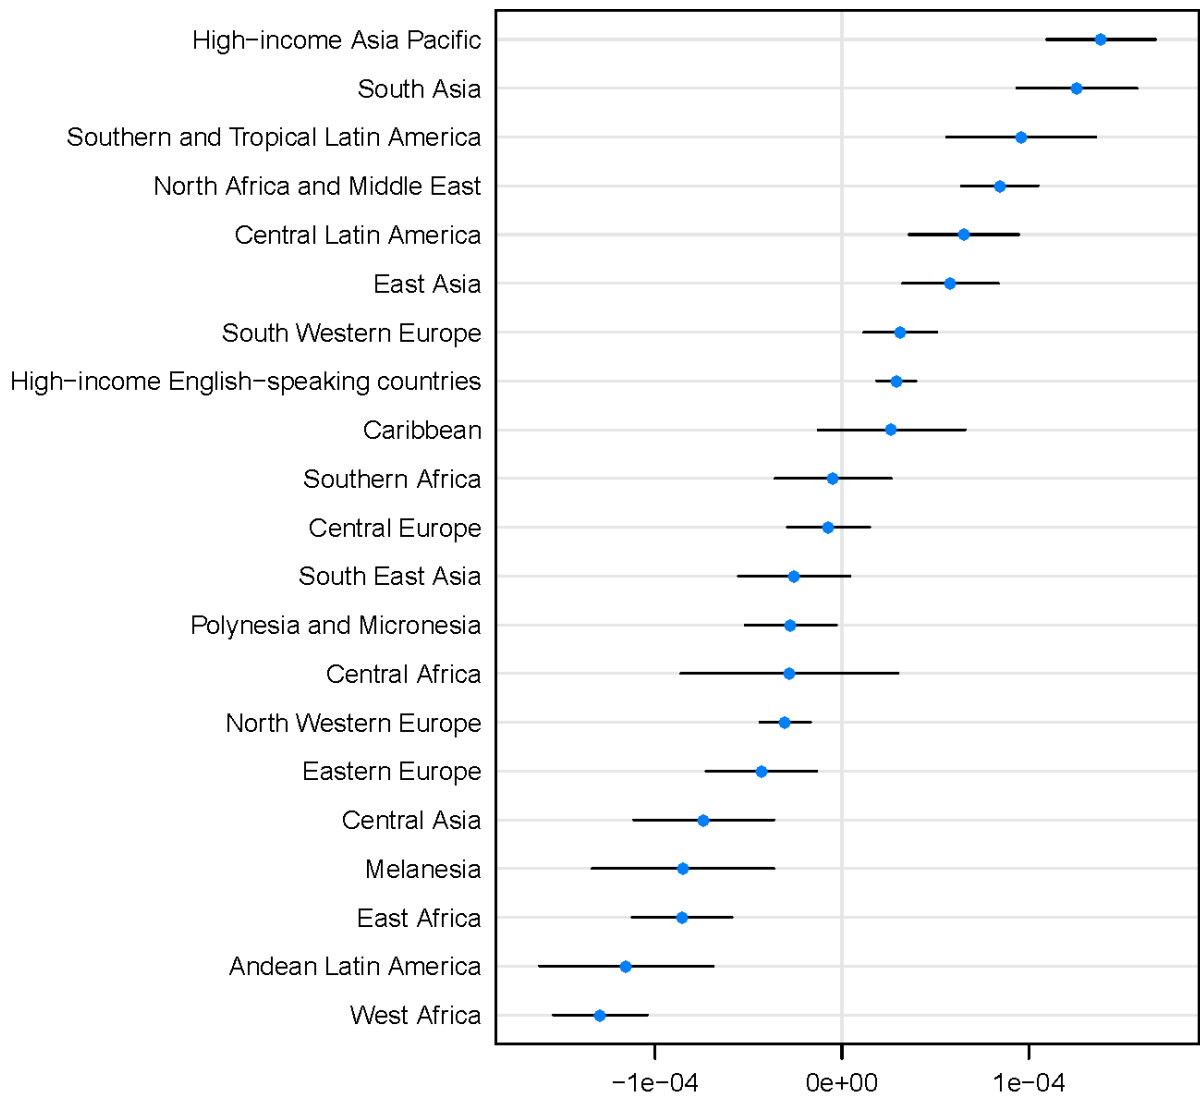



|                                                                                                                                                |                               |
|------------------------------------------------------------------------------------------------------------------------------------------------|-------------------------------|
| <b>Primary outcome: mean SBP</b>                                                                                                               |                               |
| <b>Independent variable: prevalence (SBP <math>\geq</math>160 mmHg or DBP <math>\geq</math>100 mmHg or use of antihypertensive medication)</b> |                               |
| <b>Variables</b>                                                                                                                               | <b>Coefficients (95% CI)</b>  |
| Intercept                                                                                                                                      | 0.0068 (0.0066, 0.0070)       |
| Probit-transformed prevalence (SBP $\geq$ 160 mmHg or DBP $\geq$ 100 mmHg or use of antihypertensive medication)                               | -0.00061 (-0.00064, -0.00059) |
| Mean age of age group (centred at 50 years)                                                                                                    | -1.2e-05 (-1.3e-05, -1.0e-05) |
| Male sex                                                                                                                                       | -1.3e-05 (-3.8e-05, 1.3e-05)  |
| Study mid-year (per one more recent year since 1975)                                                                                           | 5.2e-06 (4.1e-06, 6.2e-06)    |
| Natural logarithm of per-capita gross domestic product                                                                                         | 4.2e-05 (2.6e-05, 5.8e-05)    |
| Probit-transformed prevalence * mean age of age group                                                                                          | -5.9e-07 (-1.2e-06, 3.7e-08)  |
| Probit-transformed prevalence * male sex                                                                                                       | 0.00026 (0.00024, 0.00028)    |
| Random effects for regions                                                                                                                     | Yes                           |
| <b>Number of data points used to fit the model = 6,023</b>                                                                                     |                               |

Traditional  $R^2$  is not clearly defined for mixed-effect models. The conditional  $R^2$  for the model, which describes the proportion of variance explained by both fixed and random factors,<sup>11</sup> was 0.779.

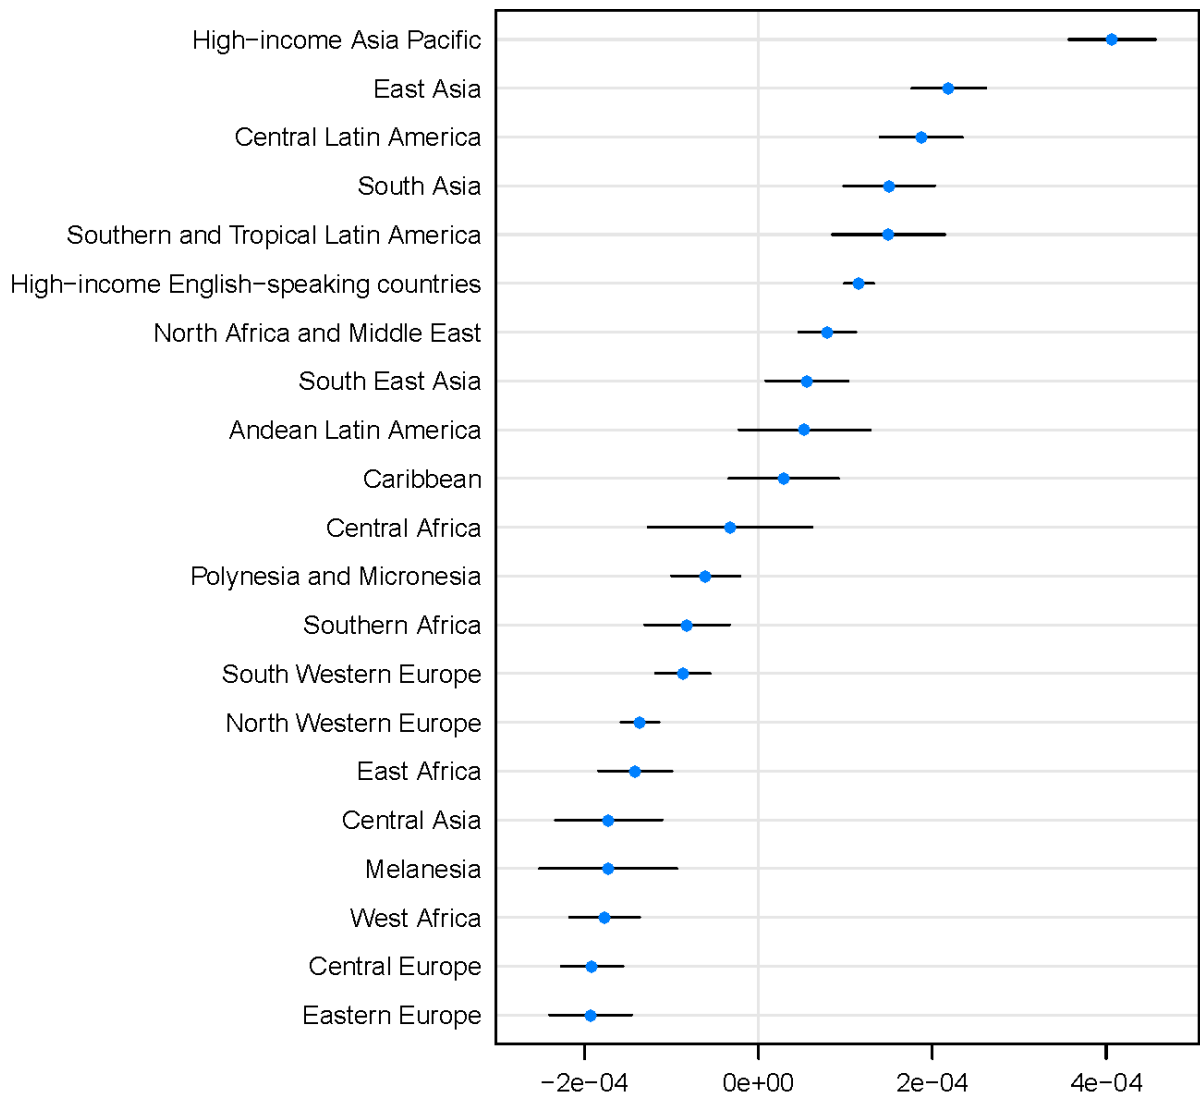

| <b>Primary outcome: mean SBP</b>                                                                                                                                                                                                                                    |                               |
|---------------------------------------------------------------------------------------------------------------------------------------------------------------------------------------------------------------------------------------------------------------------|-------------------------------|
| <b>Independent variables: prevalence (SBP <math>\geq</math>140 mmHg or DBP <math>\geq</math>90 mmHg or use of antihypertensive medication) and prevalence (SBP <math>\geq</math>160 mmHg or DBP <math>\geq</math>95 mmHg or use of antihypertensive medication)</b> |                               |
| <b>Variables</b>                                                                                                                                                                                                                                                    | <b>Coefficients (95% CI)</b>  |
| Intercept                                                                                                                                                                                                                                                           | 0.0076 (0.0075, 0.0077)       |
| Probit-transformed prevalence (SBP $\geq$ 140 mmHg or DBP $\geq$ 90 mmHg or use of antihypertensive medication)                                                                                                                                                     | -0.0012 (-0.0013, -0.0012)    |
| Probit-transformed prevalence (SBP $\geq$ 160 mmHg or DBP $\geq$ 95 mmHg or use of antihypertensive medication)                                                                                                                                                     | 0.00042 (0.00038, 0.00046)    |
| Mean age of age group (centred at 50 years)                                                                                                                                                                                                                         | 3.0e-07 (-6.2e-07, 1.2e-06)   |
| Male sex                                                                                                                                                                                                                                                            | -5.8e-05 (-8.4e-05, -3.1e-05) |
| Study mid-year (per one more recent year since 1975)                                                                                                                                                                                                                | 2.0e-06 (1.4e-06, 2.7e-06)    |
| Natural logarithm of per-capita gross domestic product                                                                                                                                                                                                              | 1.1e-05 (1.3e-06, 2.1e-05)    |
| Probit-transformed prevalence (SBP $\geq$ 140 mmHg or DBP $\geq$ 90 mmHg or use of antihypertensive medication) * mean age of age group                                                                                                                             | -7.7e-06 (-9.0e-06, -6.4e-06) |
| Probit-transformed prevalence (SBP $\geq$ 160 mmHg or DBP $\geq$ 95 mmHg or use of antihypertensive medication) * mean age of age group                                                                                                                             | 6.8e-06 (5.6e-06, 8.0e-06)    |
| Probit-transformed prevalence (SBP $\geq$ 140 mmHg or DBP $\geq$ 90 mmHg or use of antihypertensive medication) * male sex                                                                                                                                          | 0.00017 (0.00012, 0.00022)    |
| Probit-transformed prevalence (SBP $\geq$ 160 mmHg or DBP $\geq$ 95 mmHg or use of antihypertensive medication) * male sex                                                                                                                                          | -3.3e-05 (-8.3e-05, 1.7e-05)  |
| Random effects for regions                                                                                                                                                                                                                                          | Yes                           |
| <b>Number of data points used to fit the model = 8,724</b>                                                                                                                                                                                                          |                               |

Traditional  $R^2$  is not clearly defined for mixed-effect models. The conditional  $R^2$  for the model, which describes the proportion of variance explained by both fixed and random factors,<sup>11</sup> was 0.886.

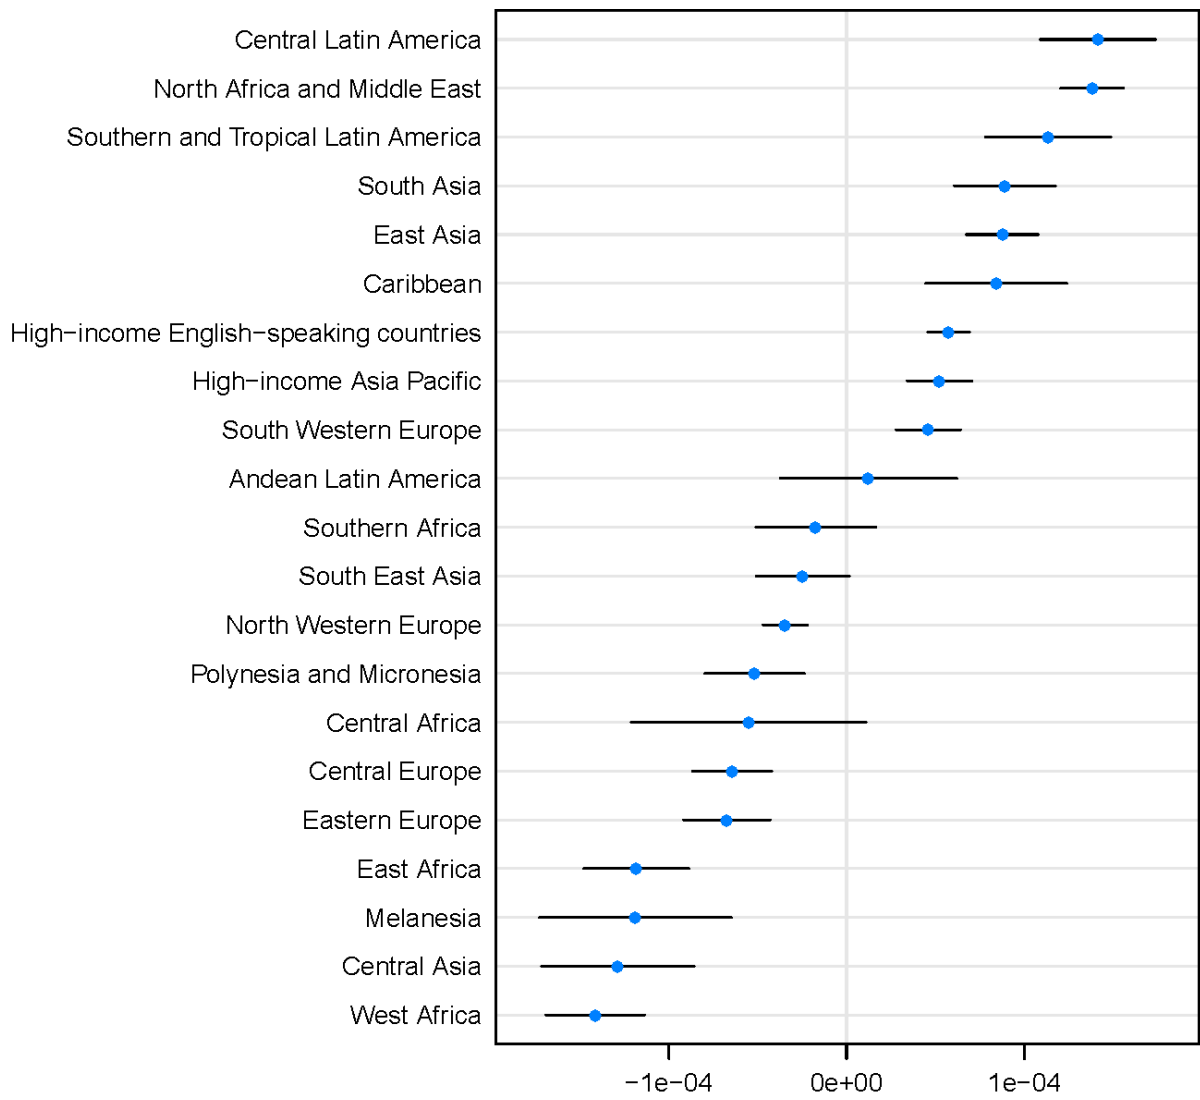

| <b>Primary outcome: mean SBP</b>                                                       |                               |
|----------------------------------------------------------------------------------------|-------------------------------|
| <b>Independent variables: prevalence (SBP ≥160 mmHg) and prevalence (DBP ≥95 mmHg)</b> |                               |
| <b>Variables</b>                                                                       | <b>Coefficients (95% CI)</b>  |
| Intercept                                                                              | 0.0066 (0.0066, 0.0068)       |
| Probit-transformed prevalence (SBP ≥160 mmHg)                                          | -0.00088 (-0.00090, -0.00086) |
| Probit-transformed prevalence (DBP ≥95 mmHg)                                           | -0.00010 (-0.00013, -8.2e-05) |
| Mean age of age group (centred at 50 years)                                            | -1.0e-05 (-1.1e-05, -9.2e-06) |
| Male sex                                                                               | 0.00014 (0.00011, 0.00016)    |
| Study mid-year (per one more recent year since 1975)                                   | -2.8e-06 (-3.5e-06, -2.2e-06) |
| Natural logarithm of per-capita gross domestic product                                 | -2.0e-05 (-2.9e-05, -1.0e-05) |
| Probit-transformed prevalence (SBP ≥160 mmHg) * mean age of age group                  | -5.6e-06 (-6.2e-06, -5.1e-06) |
| Probit-transformed prevalence (DBP ≥95 mmHg) * mean age of age group                   | 1.0e-07 (-6.0e-07, 8.1e-07)   |
| Probit-transformed prevalence (SBP ≥160 mmHg) * male sex                               | 0.00023 (0.00021, 0.00024)    |
| Probit-transformed prevalence (DBP ≥95 mmHg) * male sex                                | -3.2e-05 (-5.5e-05, -8.4e-06) |
| Random effects for regions                                                             | Yes                           |
| <b>Number of data points used to fit the model = 6,257</b>                             |                               |

Traditional  $R^2$  is not clearly defined for mixed-effect models. The conditional  $R^2$  for the model, which describes the proportion of variance explained by both fixed and random factors,<sup>11</sup> was 0.905.

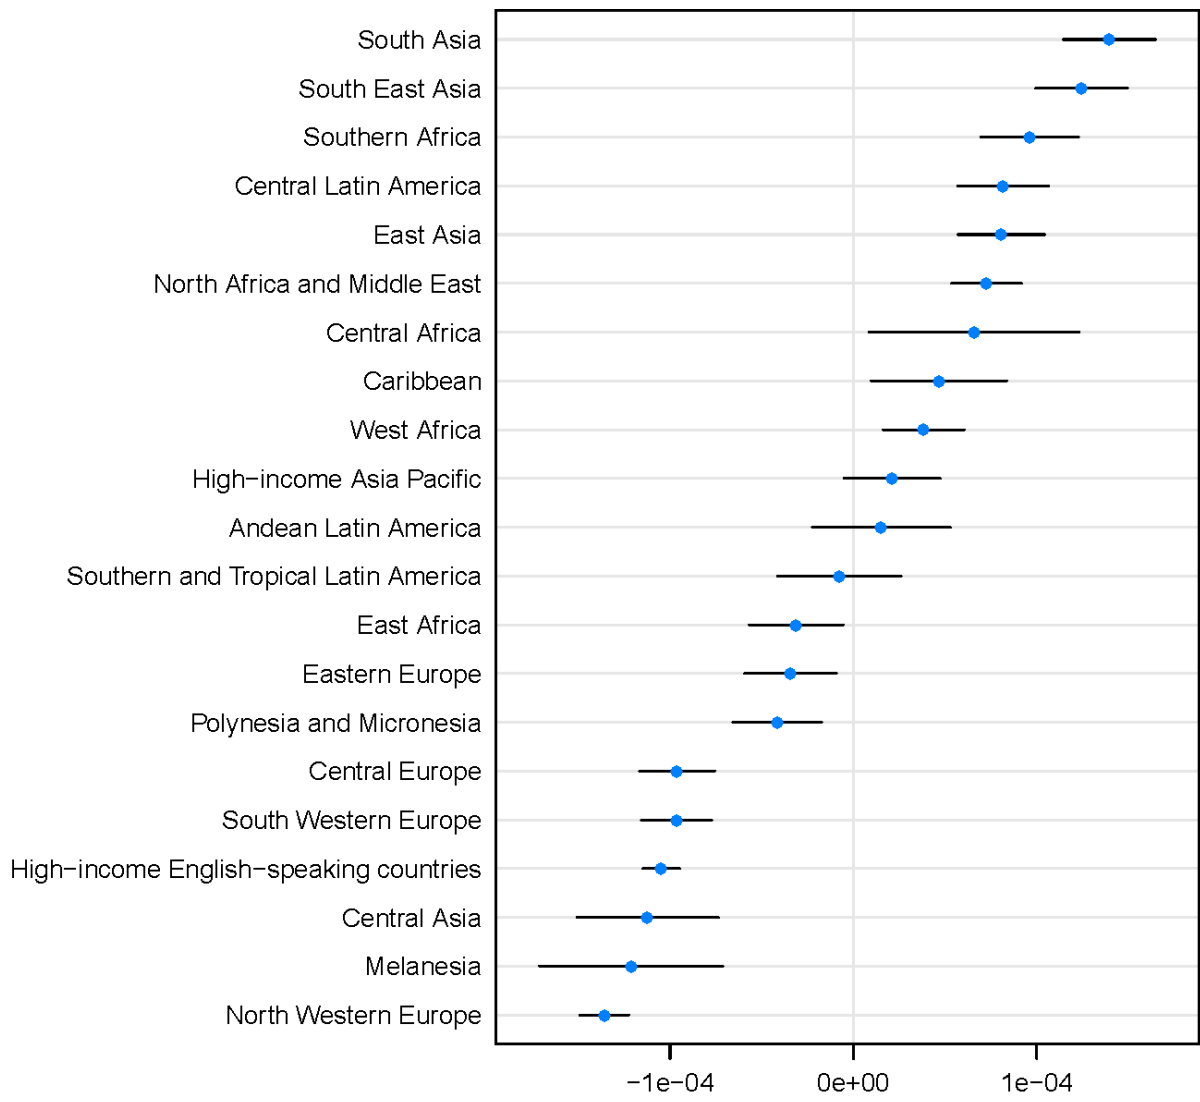

| <b>Primary outcome: mean DBP</b>                            |                               |
|-------------------------------------------------------------|-------------------------------|
| <b>Independent variable: mean SBP</b>                       |                               |
| <b>Variables</b>                                            | <b>Coefficients (95% CI)</b>  |
| Intercept                                                   | 0.012 (0.012, 0.012)          |
| Mean SBP (centred at 130 mmHg)                              | -6.5e-05 (-6.7e-05, -6.3e-05) |
| Mean age of age group (centred at 50 years)                 | 1.2e-05 (1.1e-05, 1.3e-05)    |
| Male sex                                                    | -2.2e-05 (-4.5e-05, 7.3e-07)  |
| Study mid-year (per one more recent year since 1975)        | 4.0e-06 (2.7e-06, 5.3e-06)    |
| Natural logarithm of per-capita gross domestic product      | 2.0e-05 (-2.8e-06, 4.2e-05)   |
| Mean SBP * mean age of age group                            | 1.7e-06 (1.7e-06, 1.8e-06)    |
| Mean SBP * male sex                                         | -1.1e-05 (-1.3e-05, -9.2e-06) |
| Random effects for regions                                  | Yes                           |
| <b>Number of data points used to fit the model = 11,979</b> |                               |

Traditional  $R^2$  is not clearly defined for mixed-effect models. The conditional  $R^2$  for the model, which describes the proportion of variance explained by both fixed and random factors,<sup>11</sup> was 0.640.

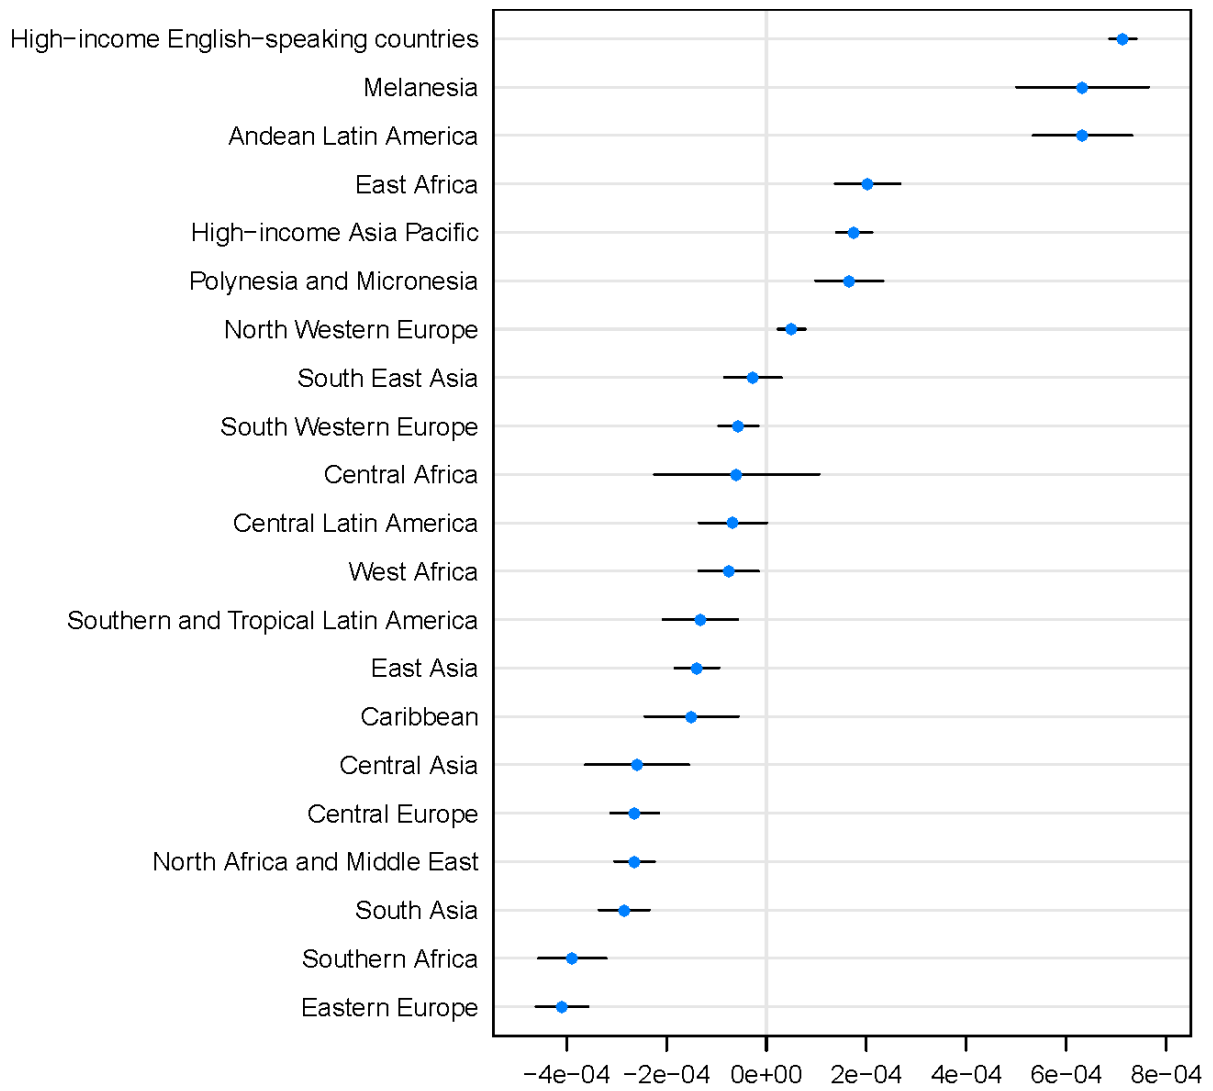



| <b>Primary outcome: mean DBP</b>                                                                        |                               |
|---------------------------------------------------------------------------------------------------------|-------------------------------|
| <b>Independent variable: prevalence (SBP <math>\geq</math>140 mmHg or DBP <math>\geq</math>90 mmHg)</b> |                               |
| <b>Variables</b>                                                                                        | <b>Coefficients (95% CI)</b>  |
| Intercept                                                                                               | 0.012 (0.012, 0.012)          |
| Probit-transformed prevalence (SBP $\geq$ 140 mmHg or DBP $\geq$ 90 mmHg)                               | -0.0012 (-0.0013, -0.0012)    |
| Mean age of age group (centred at 50 years)                                                             | 3.0e-05 (2.9e-05, 3.2e-05)    |
| Male sex                                                                                                | -0.00014 (-0.00016, -0.00011) |
| Study mid-year (per one more recent year since 1975)                                                    | 9.1e-08 (-1.1e-06, 1.3e-06)   |
| Natural logarithm of per-capita gross domestic product                                                  | 1.6e-05 (-3.7e-06, 3.6e-05)   |
| Probit-transformed prevalence * mean age of age group                                                   | 1.7e-05 (1.6e-05, 1.8e-05)    |
| Probit-transformed prevalence * male sex                                                                | -0.00021 (-0.00024, -0.00018) |
| Random effects for regions                                                                              | Yes                           |
| <b>Number of data points used to fit the model = 10,965</b>                                             |                               |

Traditional  $R^2$  is not clearly defined for mixed-effect models. The conditional  $R^2$  for the model, which describes the proportion of variance explained by both fixed and random factors,<sup>11</sup> was 0.699.

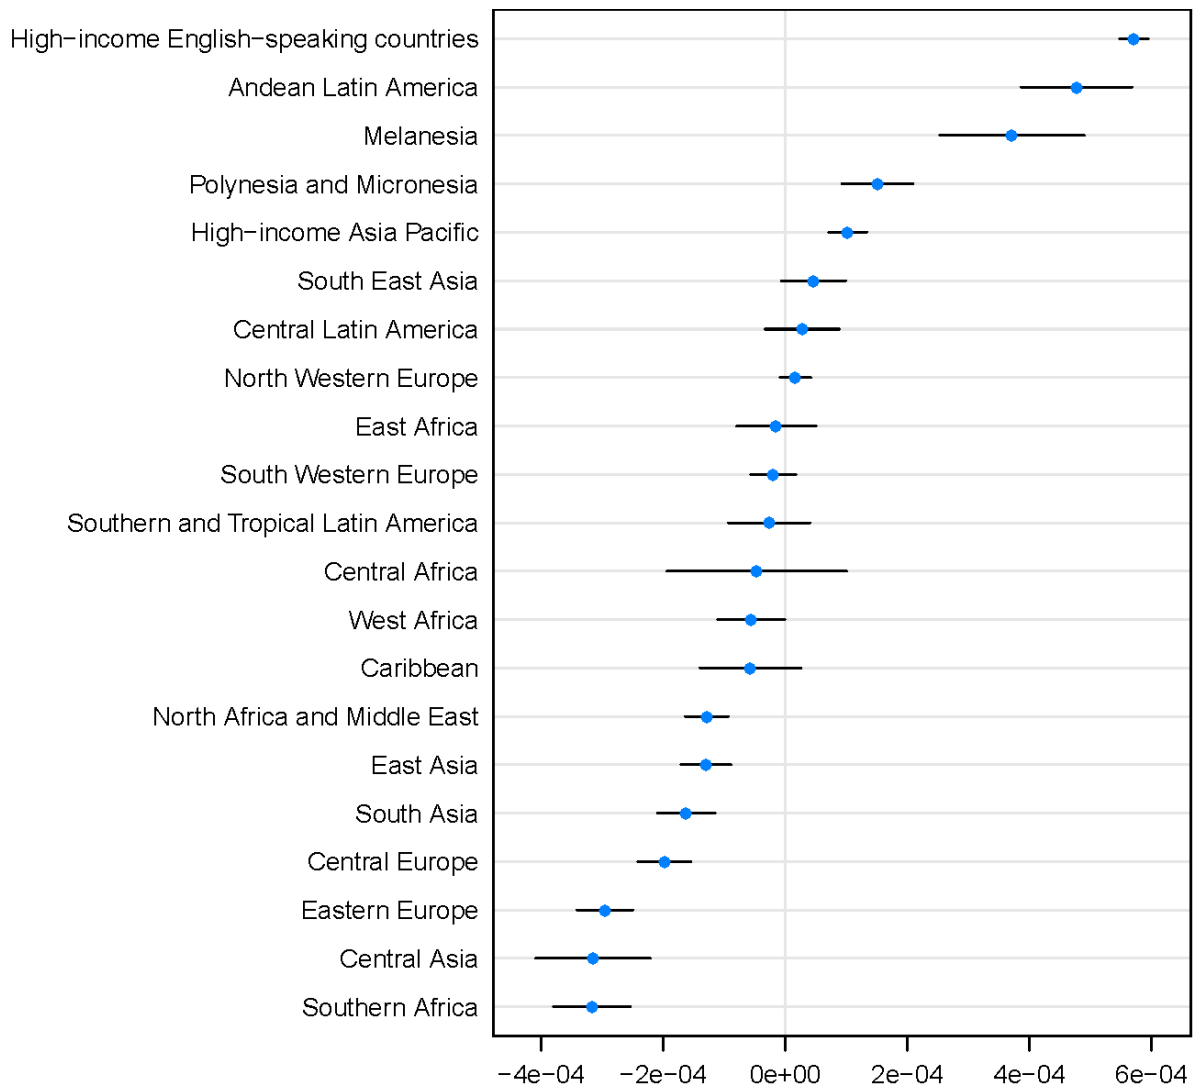

|                                                                                                                                               |                               |
|-----------------------------------------------------------------------------------------------------------------------------------------------|-------------------------------|
| <b>Primary outcome: mean DBP</b>                                                                                                              |                               |
| <b>Independent variable: prevalence (SBP <math>\geq</math>140 mmHg or DBP <math>\geq</math>90 mmHg or use of antihypertensive medication)</b> |                               |
| <b>Variables</b>                                                                                                                              | <b>Coefficients (95% CI)</b>  |
| Intercept                                                                                                                                     | 0.012 (0.011, 0.012)          |
| Probit-transformed prevalence (SBP $\geq$ 140 mmHg or DBP $\geq$ 90 mmHg or use of antihypertensive medication)                               | -0.0011 (-0.0011, -0.0010)    |
| Mean age of age group (centred at 50 years)                                                                                                   | 3.2e-05 (3.1e-05, 3.4e-05)    |
| Male sex                                                                                                                                      | -0.00018 (-0.00020, -0.00015) |
| Study mid-year (per one more recent year since 1975)                                                                                          | 9.0e-06 (7.5e-06, 1.0e-05)    |
| Natural logarithm of per-capita gross domestic product                                                                                        | 3.4e-05 (1.2e-05, 5.6e-05)    |
| Probit-transformed prevalence * mean age of age group                                                                                         | 2.4e-05 (2.3e-05, 2.4e-05)    |
| Probit-transformed prevalence * male sex                                                                                                      | -0.00014 (-0.00017, -0.00011) |
| Random effects for regions                                                                                                                    | Yes                           |
| <b>Number of data points used to fit the model = 9,124</b>                                                                                    |                               |

Traditional  $R^2$  is not clearly defined for mixed-effect models. The conditional  $R^2$  for the model, which describes the proportion of variance explained by both fixed and random factors,<sup>11</sup> was 0.672.

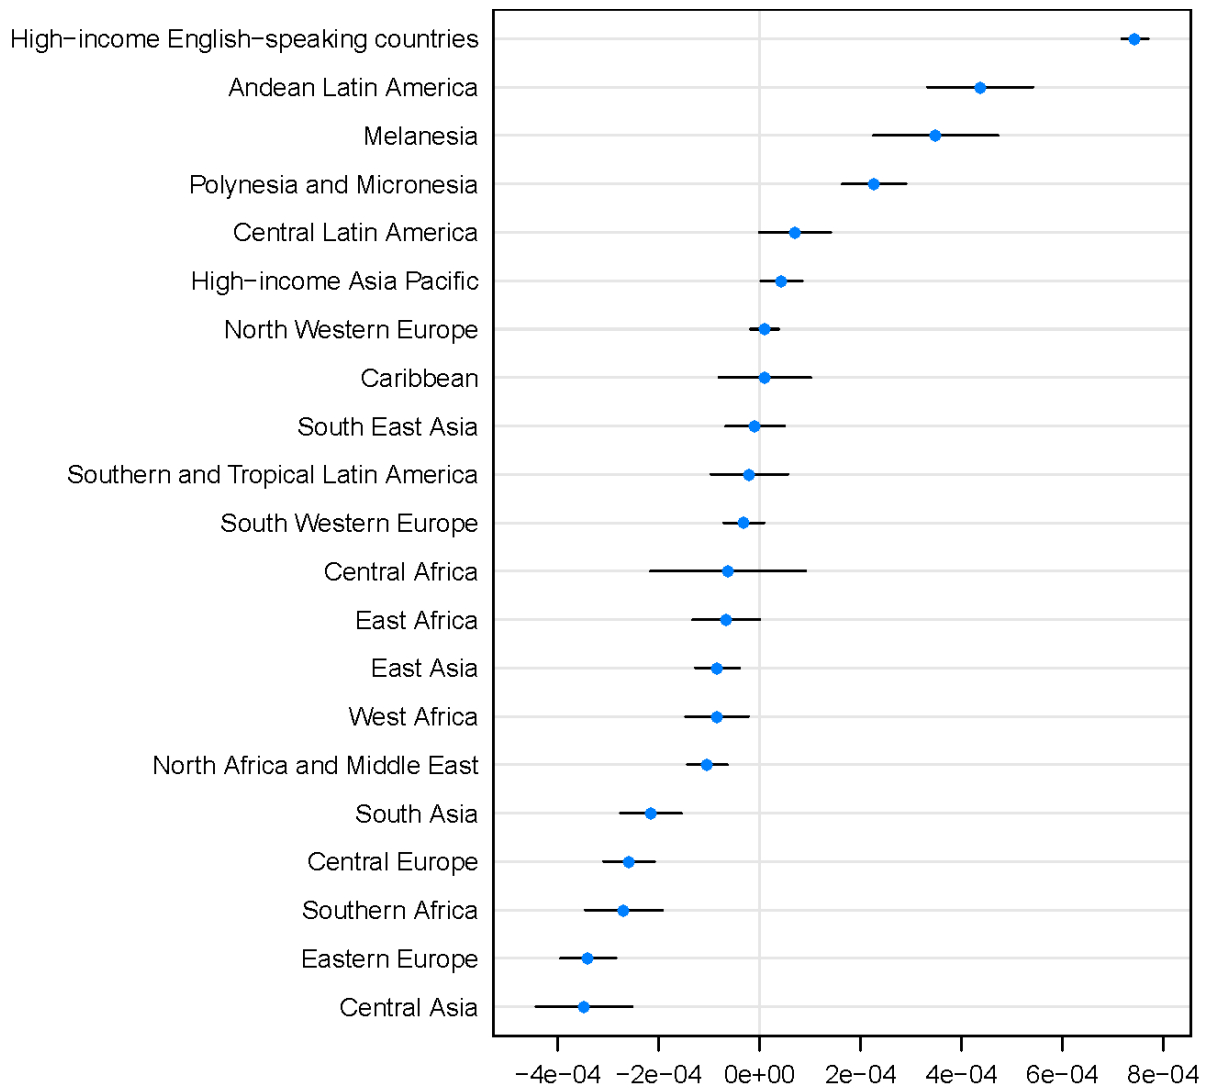

| <b>Primary outcome: mean DBP</b>                                                                                                              |                               |
|-----------------------------------------------------------------------------------------------------------------------------------------------|-------------------------------|
| <b>Independent variable: prevalence (SBP <math>\geq</math>160 mmHg or DBP <math>\geq</math>95 mmHg or use of antihypertensive medication)</b> |                               |
| <b>Variables</b>                                                                                                                              | <b>Coefficients (95% CI)</b>  |
| Intercept                                                                                                                                     | 0.011 (0.011, 0.011)          |
| Probit-transformed prevalence (SBP $\geq$ 160 mmHg or DBP $\geq$ 95 mmHg or use of antihypertensive medication)                               | -0.00096 (-0.00099, -0.00092) |
| Mean age of age group (centred at 50 years)                                                                                                   | 4.0e-05 (3.8e-05, 4.1e-05)    |
| Male sex                                                                                                                                      | -0.00026 (-0.00029, -0.00022) |
| Study mid-year (per one more recent year since 1975)                                                                                          | 1.4e-05 (1.2e-05, 1.5e-05)    |
| Natural logarithm of per-capita gross domestic product                                                                                        | 3.1e-05 (8.3e-06, 5.5e-05)    |
| Probit-transformed prevalence * mean age of age group                                                                                         | 2.6e-05 (2.5e-05, 2.7e-05)    |
| Probit-transformed prevalence * male sex                                                                                                      | 4.5e-05 (1.4e-05, 7.5e-05)    |
| Random effects for regions                                                                                                                    | Yes                           |
| <b>Number of data points used to fit the model = 8,821</b>                                                                                    |                               |

Traditional  $R^2$  is not clearly defined for mixed-effect models. The conditional  $R^2$  for the model, which describes the proportion of variance explained by both fixed and random factors,<sup>11</sup> was 0.629.

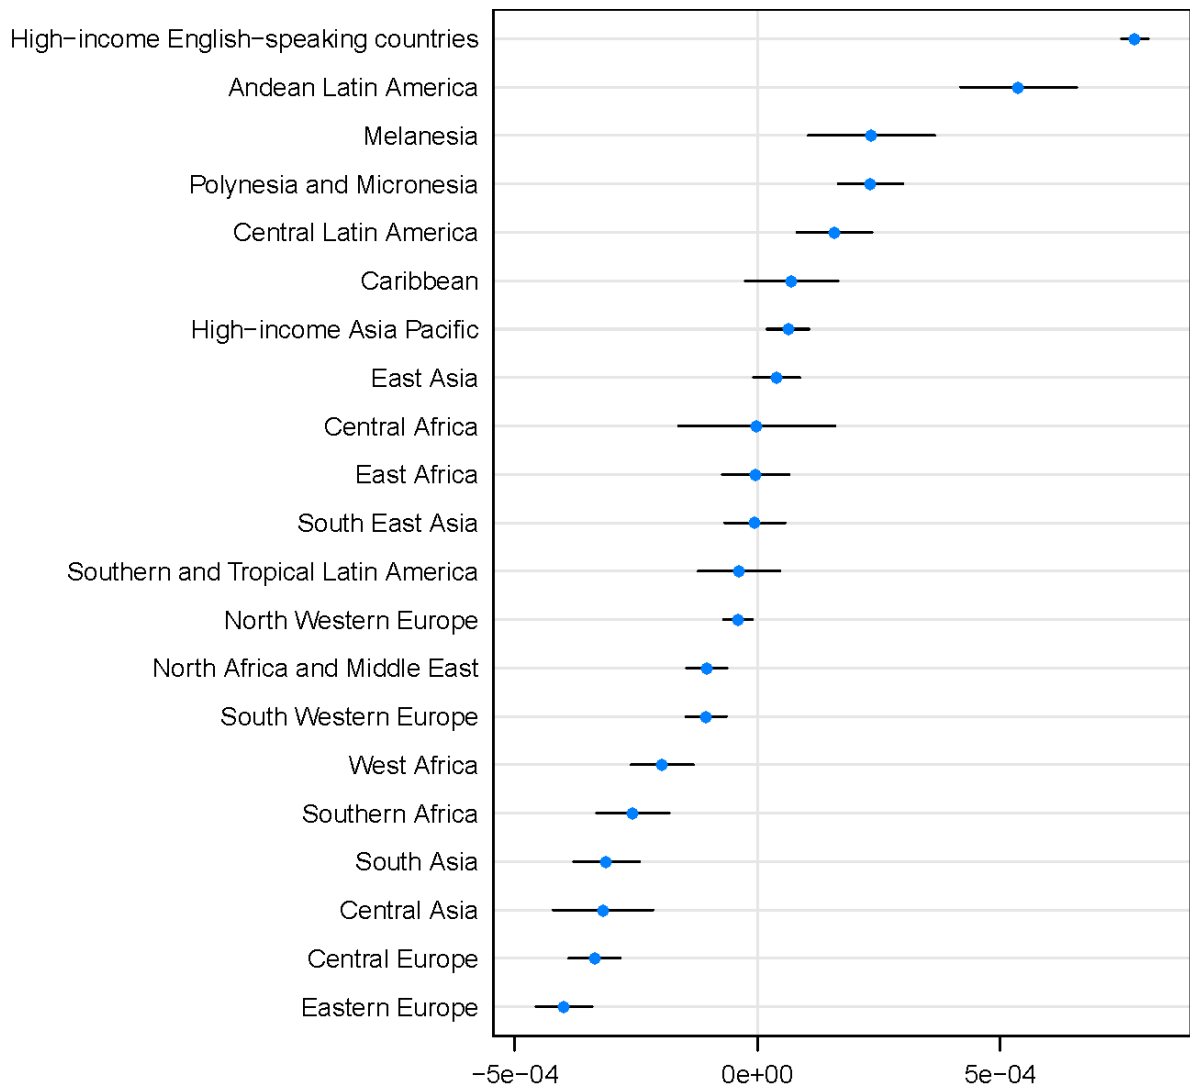

| <b>Primary outcome: mean DBP</b>                                                                        |                               |
|---------------------------------------------------------------------------------------------------------|-------------------------------|
| <b>Independent variable: prevalence (SBP <math>\geq</math>130 mmHg or DBP <math>\geq</math>85 mmHg)</b> |                               |
| <b>Variables</b>                                                                                        | <b>Coefficients (95% CI)</b>  |
| Intercept                                                                                               | 0.012 (0.012, 0.012)          |
| Probit-transformed prevalence (SBP $\geq$ 130 mmHg or DBP $\geq$ 85 mmHg)                               | -0.0012 (-0.0012, -0.0011)    |
| Mean age of age group (centred at 50 years)                                                             | 1.8e-05 (1.7e-05, 1.9e-05)    |
| Male sex                                                                                                | 3.0e-05 (1.8e-06, 5.7e-05)    |
| Study mid-year (per one more recent year since 1975)                                                    | 6.4e-06 (4.8e-06, 8.0e-06)    |
| Natural logarithm of per-capita gross domestic product                                                  | 1.7e-05 (-8.5e-06, 4.3e-05)   |
| Probit-transformed prevalence * mean age of age group                                                   | 1.7e-05 (1.6e-05, 1.8e-05)    |
| Probit-transformed prevalence * male sex                                                                | -0.00026 (-0.00030, -0.00022) |
| Random effects for regions                                                                              | Yes                           |
| <b>Number of data points used to fit the model = 7,558</b>                                              |                               |

Traditional  $R^2$  is not clearly defined for mixed-effect models. The conditional  $R^2$  for the model, which describes the proportion of variance explained by both fixed and random factors,<sup>11</sup> was 0.667.

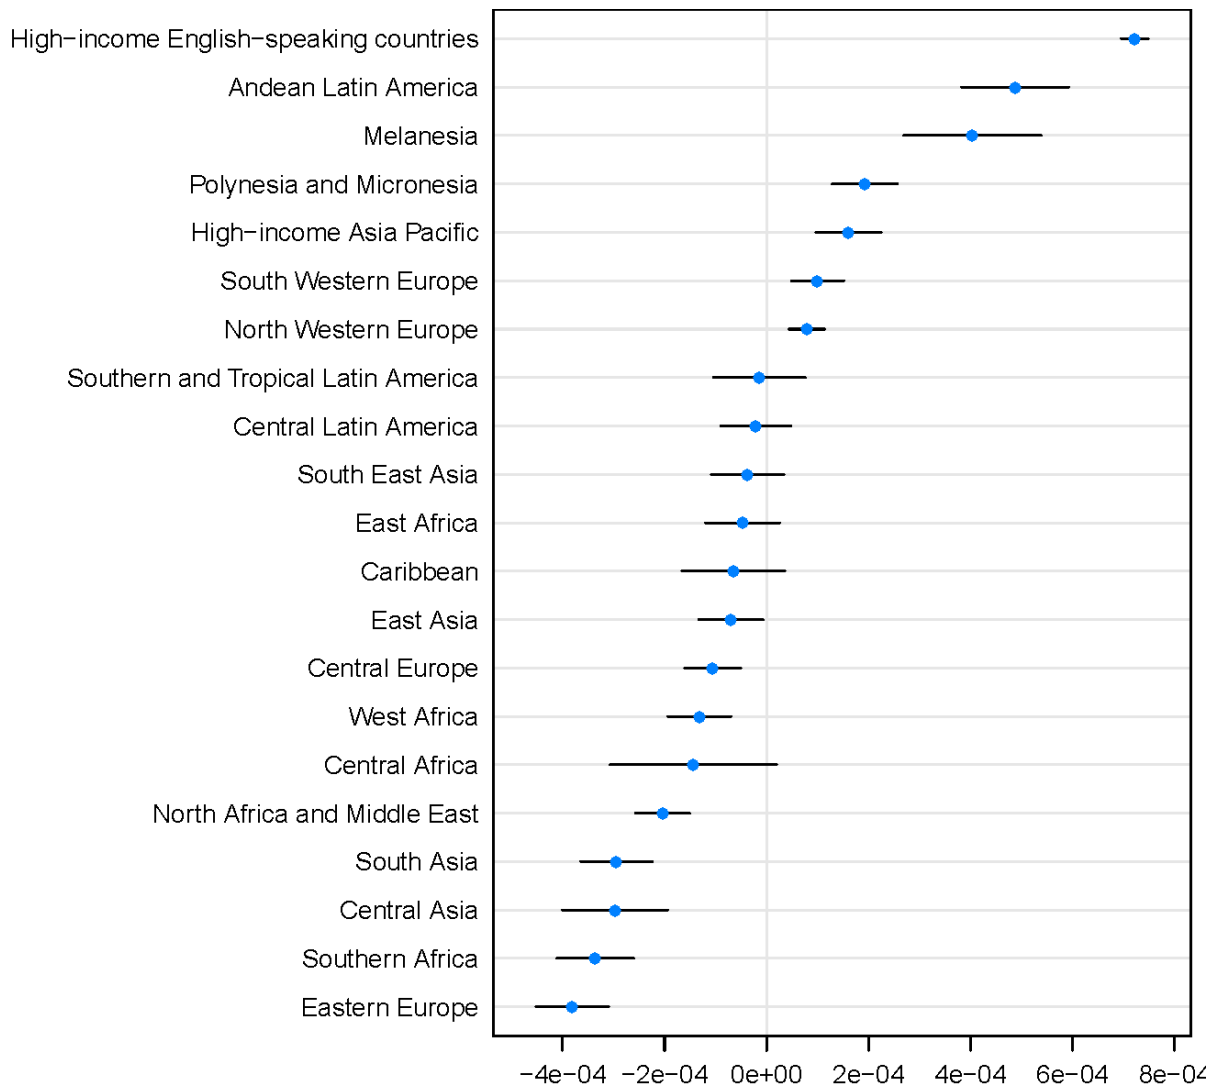



|                                                                                                         |                               |
|---------------------------------------------------------------------------------------------------------|-------------------------------|
| <b>Primary outcome: mean DBP</b>                                                                        |                               |
| <b>Independent variable: prevalence (SBP <math>\geq</math>150 mmHg or DBP <math>\geq</math>90 mmHg)</b> |                               |
| <b>Variables</b>                                                                                        | <b>Coefficients (95% CI)</b>  |
| Intercept                                                                                               | 0.011 (0.011, 0.012)          |
| Probit-transformed prevalence (SBP $\geq$ 150 mmHg or DBP $\geq$ 90 mmHg)                               | -0.0015 (-0.0015, -0.0015)    |
| Mean age of age group (centred at 50 years)                                                             | 3.4e-05 (3.3e-05, 3.5e-05)    |
| Male sex                                                                                                | -0.00019 (-0.00022, -0.00015) |
| Study mid-year (per one more recent year since 1975)                                                    | -1.2e-06 (-2.6e-06, 1.9e-07)  |
| Natural logarithm of per-capita gross domestic product                                                  | 1.9e-05 (-1.9e-06, 4.1e-05)   |
| Probit-transformed prevalence * mean age of age group                                                   | 1.3e-05 (1.2e-05, 1.4e-05)    |
| Probit-transformed prevalence * male sex                                                                | -0.00015 (-0.00018, -0.00012) |
| Random effects for regions                                                                              | Yes                           |
| <b>Number of data points used to fit the model = 7,412</b>                                              |                               |

Traditional  $R^2$  is not clearly defined for mixed-effect models. The conditional  $R^2$  for the model, which describes the proportion of variance explained by both fixed and random factors,<sup>11</sup> was 0.748.

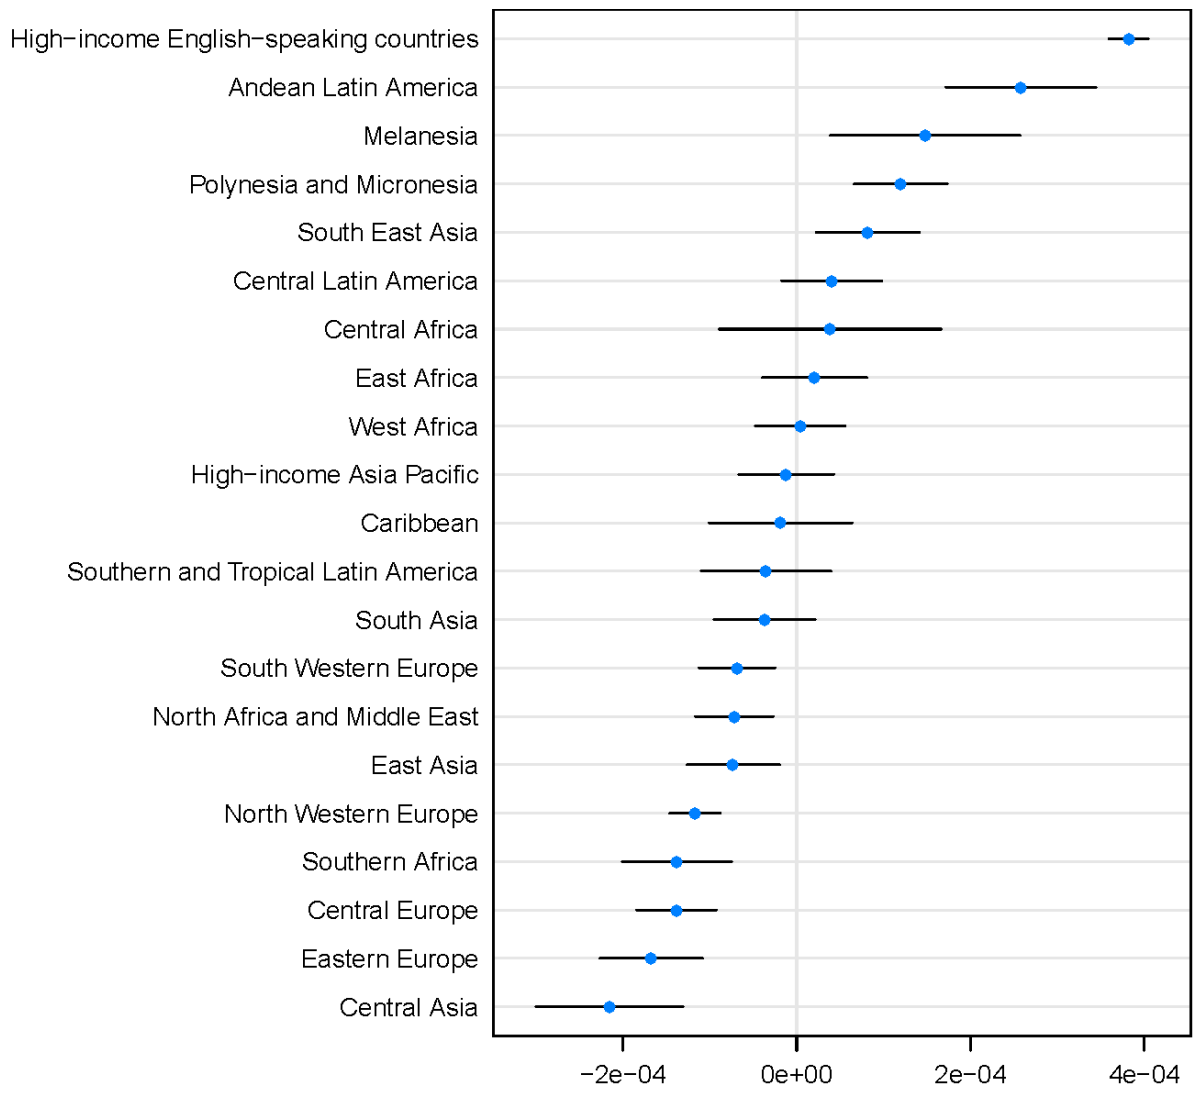

|                                                                                                         |                               |
|---------------------------------------------------------------------------------------------------------|-------------------------------|
| <b>Primary outcome: mean DBP</b>                                                                        |                               |
| <b>Independent variable: prevalence (SBP <math>\geq</math>160 mmHg or DBP <math>\geq</math>90 mmHg)</b> |                               |
| <b>Variables</b>                                                                                        | <b>Coefficients (95% CI)</b>  |
| Intercept                                                                                               | 0.011 (0.011, 0.012)          |
| Probit-transformed prevalence (SBP $\geq$ 160 mmHg or DBP $\geq$ 90 mmHg)                               | -0.0016 (-0.0016, -0.0016)    |
| Mean age of age group (centred at 50 years)                                                             | 2.4e-05 (2.3e-05, 2.6e-05)    |
| Male sex                                                                                                | -0.00016 (-0.00019, -0.00012) |
| Study mid-year (per one more recent year since 1975)                                                    | -3.0e-06 (-4.3e-06, -1.7e-06) |
| Natural logarithm of per-capita gross domestic product                                                  | 1.4e-05 (-4.5e-06, 3.4e-05)   |
| Probit-transformed prevalence * mean age of age group                                                   | 6.2e-06 (5.2e-06, 7.2e-06)    |
| Probit-transformed prevalence * male sex                                                                | -8.2e-05 (-0.00012, -4.8e-05) |
| Random effects for regions                                                                              | Yes                           |
| <b>Number of data points used to fit the model = 7,389</b>                                              |                               |

Traditional  $R^2$  is not clearly defined for mixed-effect models. The conditional  $R^2$  for the model, which describes the proportion of variance explained by both fixed and random factors,<sup>11</sup> was 0.796.

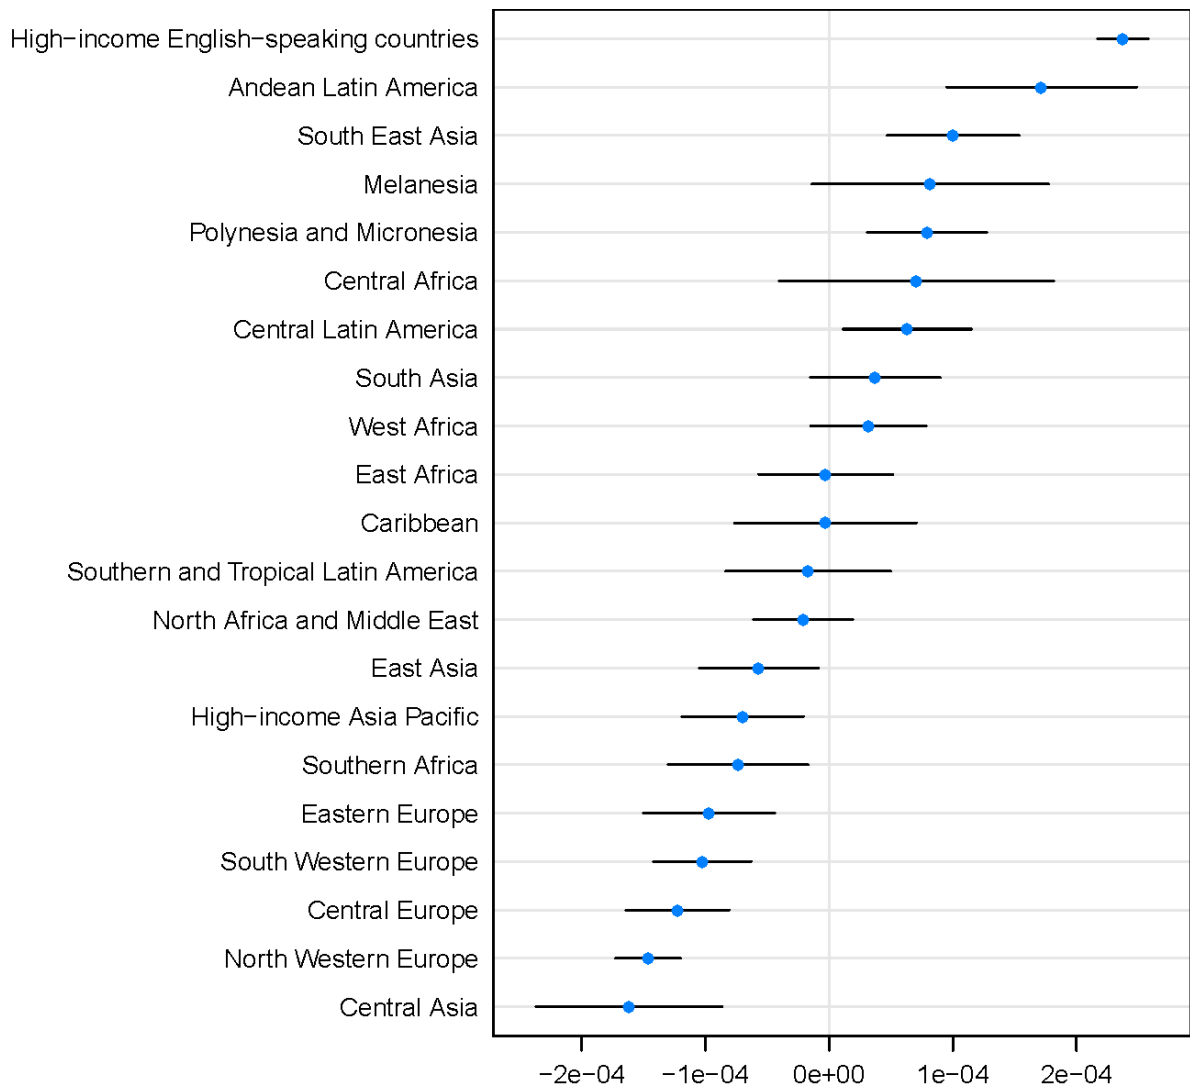

| <b>Primary outcome: mean DBP</b>                                                                        |                               |
|---------------------------------------------------------------------------------------------------------|-------------------------------|
| <b>Independent variable: prevalence (SBP <math>\geq</math>160 mmHg or DBP <math>\geq</math>95 mmHg)</b> |                               |
| <b>Variables</b>                                                                                        | <b>Coefficients (95% CI)</b>  |
| Intercept                                                                                               | 0.011 (0.010, 0.011)          |
| Probit-transformed prevalence (SBP $\geq$ 160 mmHg or DBP $\geq$ 95 mmHg)                               | -0.0015 (-0.0015, -0.0015)    |
| Mean age of age group (centred at 50 years)                                                             | 4.0e-05 (3.8e-05, 4.2e-05)    |
| Male sex                                                                                                | -0.00024 (-0.00029, -0.00019) |
| Study mid-year (per one more recent year since 1975)                                                    | 1.7e-06 (2.7e-07, 3.1e-06)    |
| Natural logarithm of per-capita gross domestic product                                                  | 2.8e-05 (6.3e-06, 5.1e-05)    |
| Probit-transformed prevalence * mean age of age group                                                   | 1.3e-05 (1.2e-05, 1.4e-05)    |
| Probit-transformed prevalence * male sex                                                                | -8.2e-05 (-0.00012, -4.4e-05) |
| Random effects for regions                                                                              | Yes                           |
| <b>Number of data points used to fit the model = 7,469</b>                                              |                               |

Traditional  $R^2$  is not clearly defined for mixed-effect models. The conditional  $R^2$  for the model, which describes the proportion of variance explained by both fixed and random factors,<sup>11</sup> was 0.713.

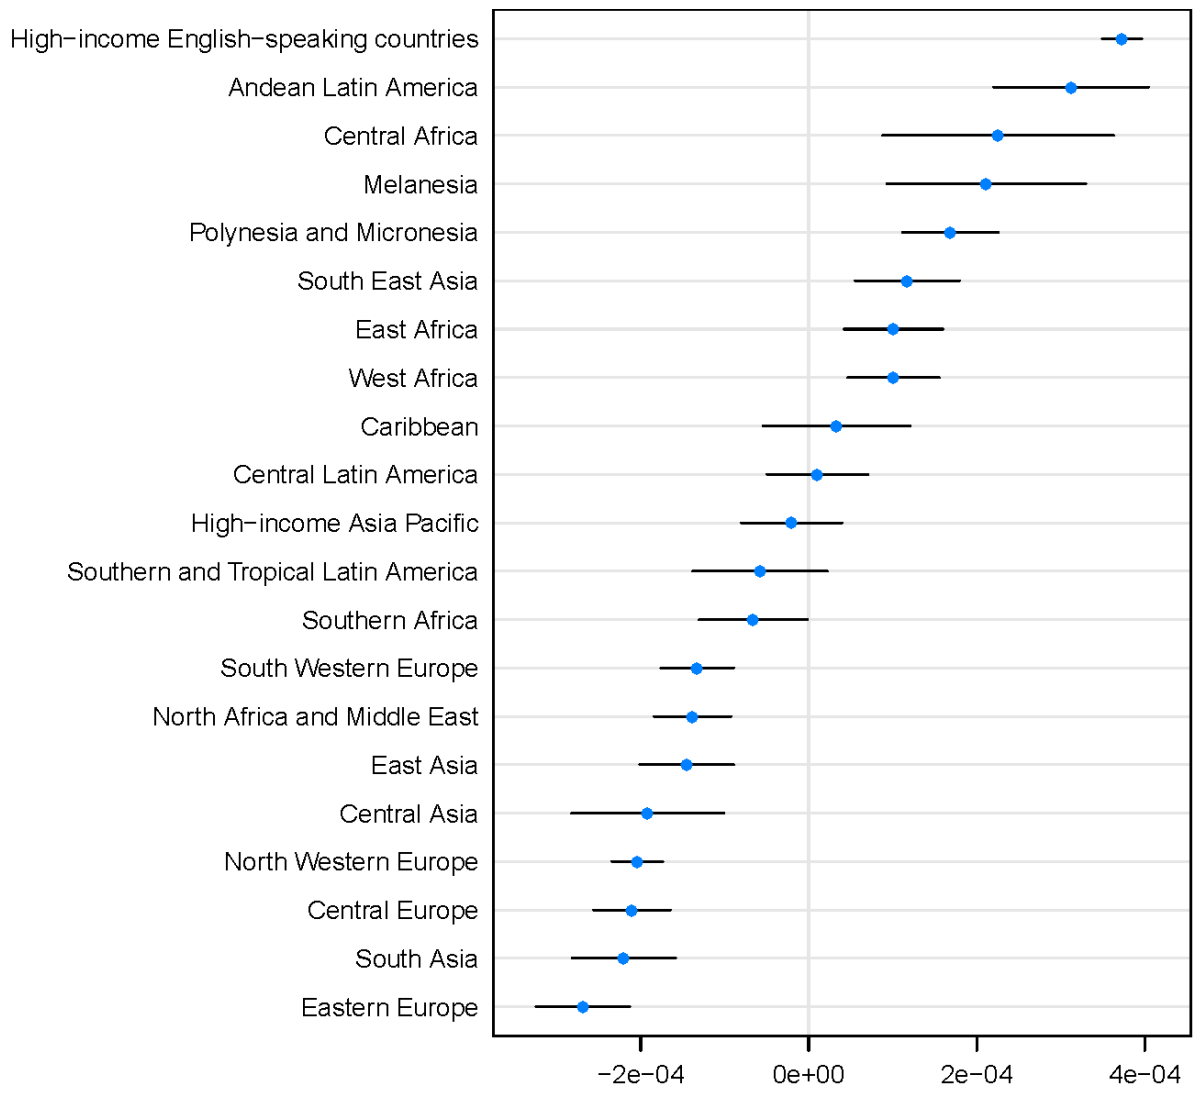

| <b>Primary outcome: mean DBP</b>                                                                                                              |                               |
|-----------------------------------------------------------------------------------------------------------------------------------------------|-------------------------------|
| <b>Independent variable: prevalence (SBP <math>\geq</math>130 mmHg or DBP <math>\geq</math>85 mmHg or use of antihypertensive medication)</b> |                               |
| <b>Variables</b>                                                                                                                              | <b>Coefficients (95% CI)</b>  |
| Intercept                                                                                                                                     | 0.012 (0.012, 0.012)          |
| Probit-transformed prevalence (SBP $\geq$ 130 mmHg or DBP $\geq$ 85 mmHg or use of antihypertensive medication)                               | -0.00099 (-0.0010, -0.00095)  |
| Mean age of age group (centred at 50 years)                                                                                                   | 1.8e-05 (1.6e-05, 2.0e-05)    |
| Male sex                                                                                                                                      | 2.3e-05 (-8.1e-06, 5.5e-05)   |
| Study mid-year (per one more recent year since 1975)                                                                                          | 1.0e-05 (8.5e-06, 1.2e-05)    |
| Natural logarithm of per-capita gross domestic product                                                                                        | 3.3e-05 (4.8e-06, 6.0e-05)    |
| Probit-transformed prevalence * mean age of age group                                                                                         | 2.5e-05 (2.4e-05, 2.6e-05)    |
| Probit-transformed prevalence * male sex                                                                                                      | -0.00026 (-0.00030, -0.00022) |
| Random effects for regions                                                                                                                    | Yes                           |
| <b>Number of data points used to fit the model = 6,346</b>                                                                                    |                               |

Traditional  $R^2$  is not clearly defined for mixed-effect models. The conditional  $R^2$  for the model, which describes the proportion of variance explained by both fixed and random factors,<sup>11</sup> was 0.652.

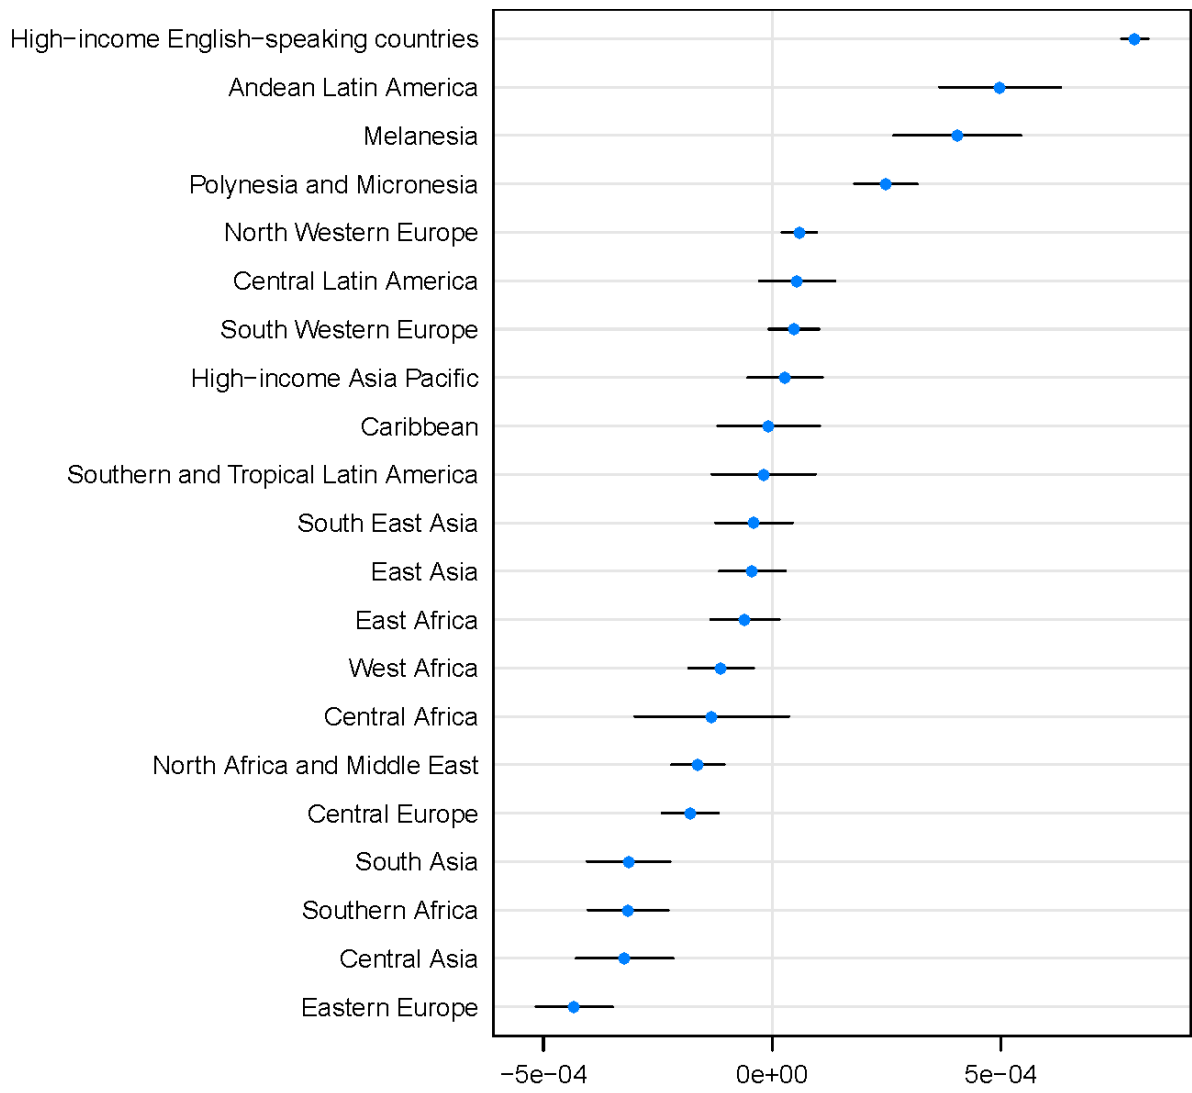



|                                                                                                                                                |                               |
|------------------------------------------------------------------------------------------------------------------------------------------------|-------------------------------|
| <b>Primary outcome: mean DBP</b>                                                                                                               |                               |
| <b>Independent variable: prevalence (SBP <math>\geq</math>160 mmHg or DBP <math>\geq</math>100 mmHg or use of antihypertensive medication)</b> |                               |
| <b>Variables</b>                                                                                                                               | <b>Coefficients (95% CI)</b>  |
| Intercept                                                                                                                                      | 0.011 (0.011, 0.011)          |
| Probit-transformed prevalence (SBP $\geq$ 160 mmHg or DBP $\geq$ 100 mmHg or use of antihypertensive medication)                               | -0.00079 (-0.00084, -0.00074) |
| Mean age of age group (centred at 50 years)                                                                                                    | 3.9e-05 (3.6e-05, 4.1e-05)    |
| Male sex                                                                                                                                       | -0.00024 (-0.00029, -0.00020) |
| Study mid-year (per one more recent year since 1975)                                                                                           | 1.3e-05 (1.1e-05, 1.5e-05)    |
| Natural logarithm of per-capita gross domestic product                                                                                         | 5.4e-05 (2.3e-05, 8.4e-05)    |
| Probit-transformed prevalence * mean age of age group                                                                                          | 2.8e-05 (2.7e-05, 2.9e-05)    |
| Probit-transformed prevalence * male sex                                                                                                       | 0.00011 (6.8e-05, 0.00015)    |
| Random effects for regions                                                                                                                     | Yes                           |
| <b>Number of data points used to fit the model = 6,023</b>                                                                                     |                               |

Traditional  $R^2$  is not clearly defined for mixed-effect models. The conditional  $R^2$  for the model, which describes the proportion of variance explained by both fixed and random factors,<sup>11</sup> was 0.572.

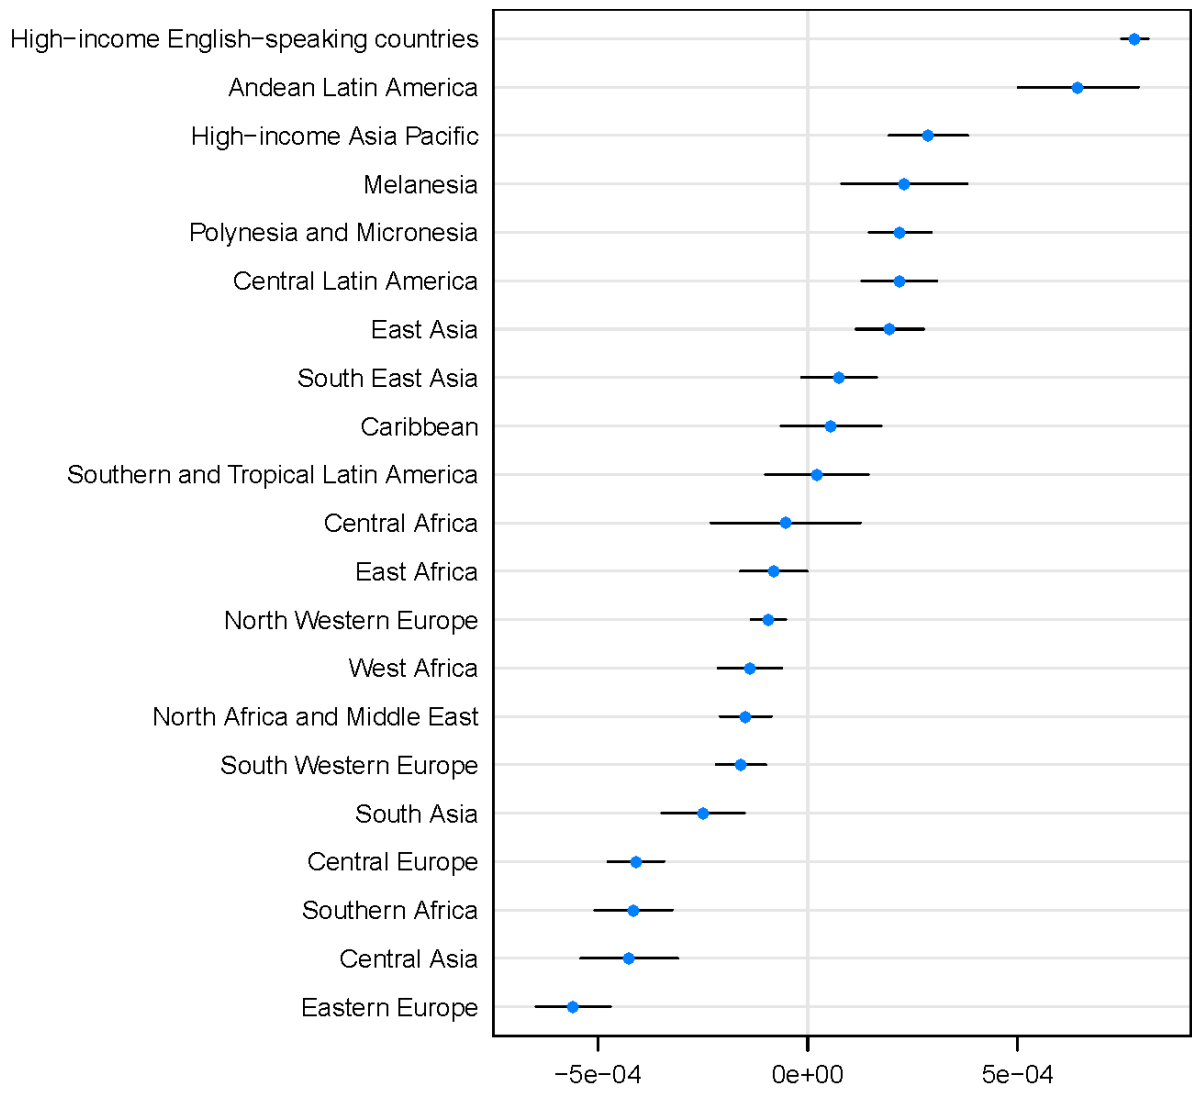

| <b>Primary outcome: mean DBP</b>                                                                                                                        |                               |
|---------------------------------------------------------------------------------------------------------------------------------------------------------|-------------------------------|
| <b>Independent variables: prevalence (SBP <math>\geq</math>140 mmHg or DBP <math>\geq</math>90 mmHg) and prevalence (SBP <math>\geq</math>140 mmHg)</b> |                               |
| <b>Variables</b>                                                                                                                                        | <b>Coefficients (95% CI)</b>  |
| Intercept                                                                                                                                               | 0.012 (0.012, 0.012)          |
| Probit-transformed prevalence (SBP $\geq$ 140 mmHg or DBP $\geq$ 90 mmHg)                                                                               | -0.0027 (-0.0028, -0.0026)    |
| Probit-transformed prevalence (SBP $\geq$ 140 mmHg)                                                                                                     | 0.0015 (0.0014, 0.0016)       |
| Mean age of age group (centred at 50 years)                                                                                                             | 2.8e-05 (2.7e-05, 2.9e-05)    |
| Male sex                                                                                                                                                | -5.2e-05 (-8.0e-05, -2.4e-05) |
| Study mid-year (per one more recent year since 1975)                                                                                                    | -9.3e-07 (-2.1e-06, 2.1e-07)  |
| Natural logarithm of per-capita gross domestic product                                                                                                  | 7.2e-06 (-1.1e-05, 2.6e-05)   |
| Probit-transformed prevalence (SBP $\geq$ 140 mmHg or DBP $\geq$ 90 mmHg) * mean age of age group                                                       | -4.5e-05 (-4.8e-05, -4.1e-05) |
| Probit-transformed prevalence (SBP $\geq$ 140 mmHg) * mean age of age group                                                                             | 5.7e-05 (5.3e-05, 6.0e-05)    |
| Probit-transformed prevalence (SBP $\geq$ 140 mmHg or DBP $\geq$ 90 mmHg) * male sex                                                                    | -0.00036 (-0.00048, -0.00024) |
| Probit-transformed prevalence (SBP $\geq$ 140 mmHg) * male sex                                                                                          | 0.00021 (9.8e-05, 0.00031)    |
| Random effects for regions                                                                                                                              | Yes                           |
| <b>Number of data points used to fit the model = 10,516</b>                                                                                             |                               |

Traditional  $R^2$  is not clearly defined for mixed-effect models. The conditional  $R^2$  for the model, which describes the proportion of variance explained by both fixed and random factors,<sup>11</sup> was 0.743.

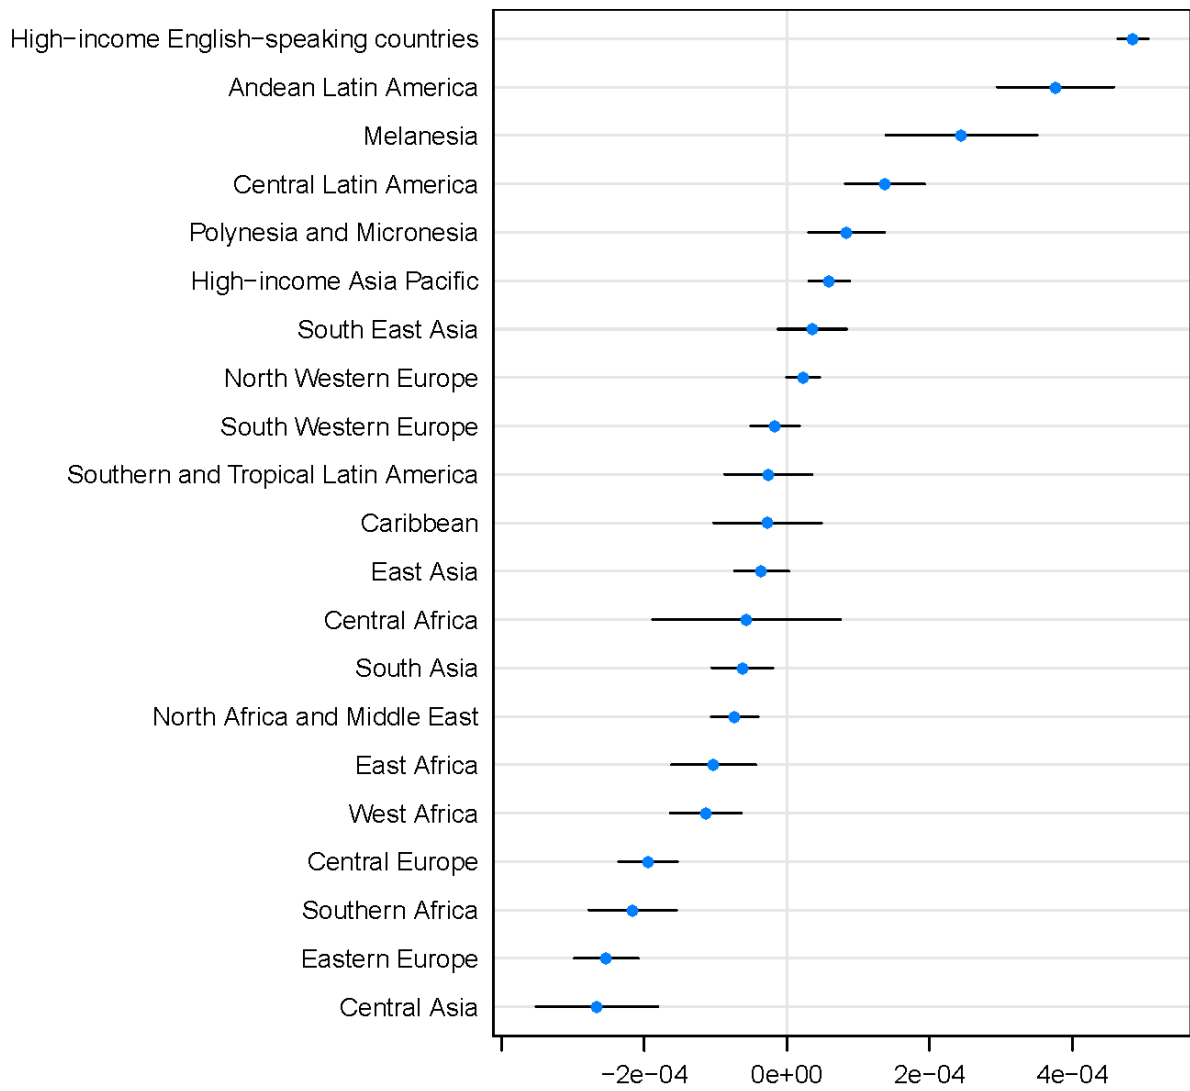

| <b>Primary outcome: mean DBP</b>                                                                                                                                                                                                                                    |                               |
|---------------------------------------------------------------------------------------------------------------------------------------------------------------------------------------------------------------------------------------------------------------------|-------------------------------|
| <b>Independent variables: prevalence (SBP <math>\geq</math>140 mmHg or DBP <math>\geq</math>90 mmHg or use of antihypertensive medication) and prevalence (SBP <math>\geq</math>160 mmHg or DBP <math>\geq</math>95 mmHg or use of antihypertensive medication)</b> |                               |
| <b>Variables</b>                                                                                                                                                                                                                                                    | <b>Coefficients (95% CI)</b>  |
| Intercept                                                                                                                                                                                                                                                           | 0.012 (0.012, 0.012)          |
| Probit-transformed prevalence (SBP $\geq$ 140 mmHg or DBP $\geq$ 90 mmHg or use of antihypertensive medication)                                                                                                                                                     | -0.0016 (-0.0017, -0.0015)    |
| Probit-transformed prevalence (SBP $\geq$ 160 mmHg or DBP $\geq$ 95 mmHg or use of antihypertensive medication)                                                                                                                                                     | 0.00044 (0.00036, 0.00052)    |
| Mean age of age group (centred at 50 years)                                                                                                                                                                                                                         | 5.8e-05 (5.6e-05, 6.0e-05)    |
| Male sex                                                                                                                                                                                                                                                            | -0.00038 (-0.00043, -0.00032) |
| Study mid-year (per one more recent year since 1975)                                                                                                                                                                                                                | 7.4e-06 (6.0e-06, 8.7e-06)    |
| Natural logarithm of per-capita gross domestic product                                                                                                                                                                                                              | 2.0e-05 (-6.1e-07, 4.0e-05)   |
| Probit-transformed prevalence (SBP $\geq$ 140 mmHg or DBP $\geq$ 90 mmHg or use of antihypertensive medication) * mean age of age group                                                                                                                             | -1.9e-05 (-2.2e-05, -1.6e-05) |
| Probit-transformed prevalence (SBP $\geq$ 160 mmHg or DBP $\geq$ 95 mmHg or use of antihypertensive medication) * mean age of age group                                                                                                                             | 4.5e-05 (4.2e-05, 4.7e-05)    |
| Probit-transformed prevalence (SBP $\geq$ 140 mmHg or DBP $\geq$ 90 mmHg or use of antihypertensive medication) * male sex                                                                                                                                          | 0.00039 (0.00028, 0.00049)    |
| Probit-transformed prevalence (SBP $\geq$ 160 mmHg or DBP $\geq$ 95 mmHg or use of antihypertensive medication) * male sex                                                                                                                                          | -0.00043 (-0.00054, -0.00033) |
| Random effects for regions                                                                                                                                                                                                                                          | Yes                           |
| <b>Number of data points used to fit the model = 8,723</b>                                                                                                                                                                                                          |                               |

Traditional  $R^2$  is not clearly defined for mixed-effect models. The conditional  $R^2$  for the model, which describes the proportion of variance explained by both fixed and random factors,<sup>11</sup> was 0.716.

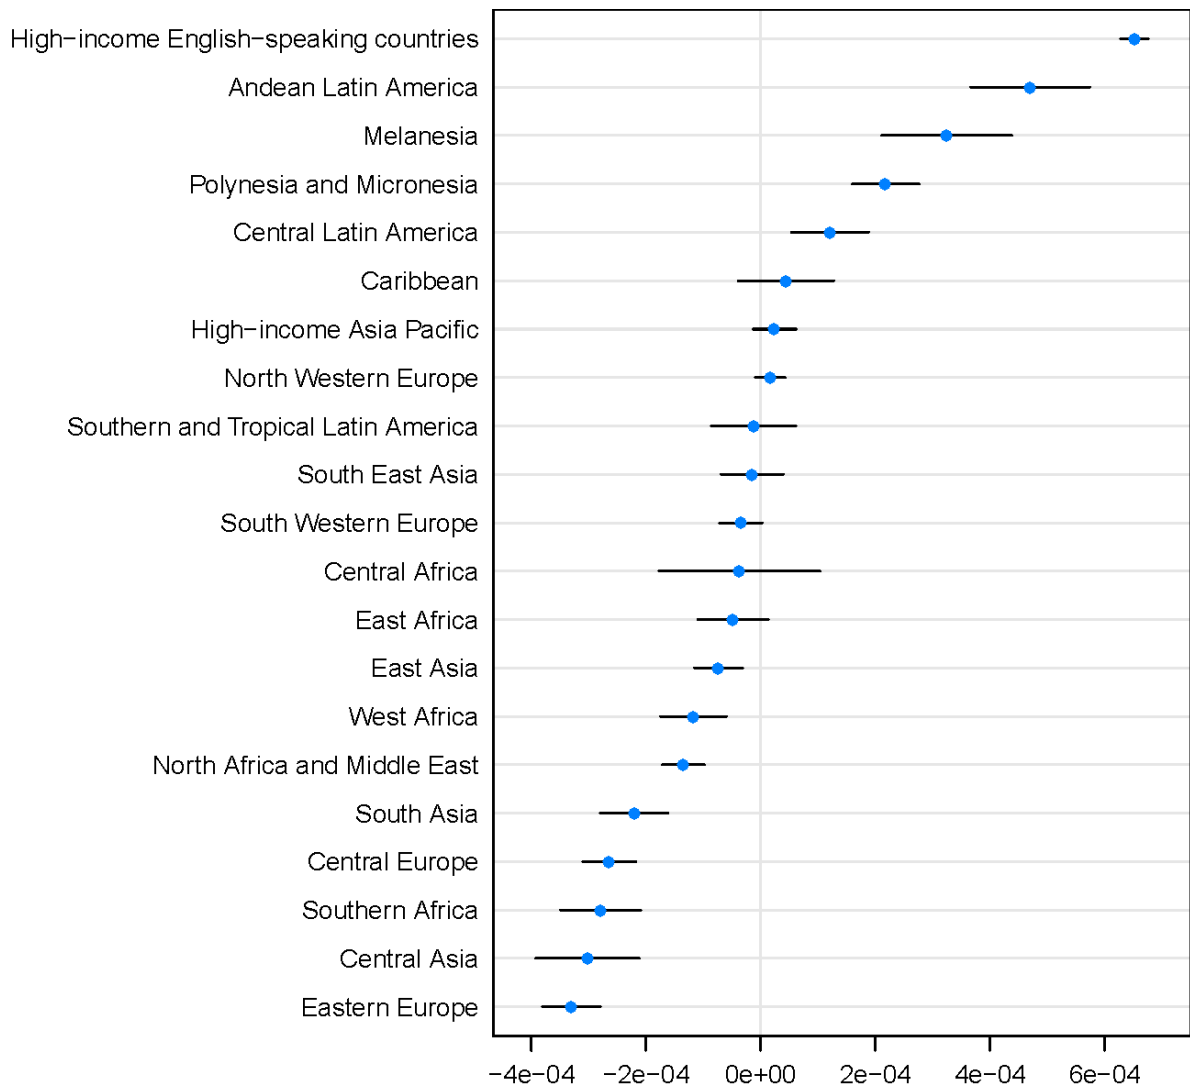

| <b>Primary outcome: mean DBP</b>                                                                                                                                                                                              |                               |
|-------------------------------------------------------------------------------------------------------------------------------------------------------------------------------------------------------------------------------|-------------------------------|
| <b>Independent variables: prevalence (SBP <math>\geq</math>140 mmHg or DBP <math>\geq</math>90 mmHg or use of antihypertensive medication) and prevalence (SBP <math>\geq</math>140 mmHg or DBP <math>\geq</math>90 mmHg)</b> |                               |
| <b>Variables</b>                                                                                                                                                                                                              | <b>Coefficients (95% CI)</b>  |
| Intercept                                                                                                                                                                                                                     | 0.012 (0.012, 0.012)          |
| Probit-transformed prevalence (SBP $\geq$ 140 mmHg or DBP $\geq$ 90 mmHg or use of antihypertensive medication)                                                                                                               | -7.3e-05 (-0.00015, 4.8e-06)  |
| Probit-transformed prevalence (SBP $\geq$ 140 mmHg or DBP $\geq$ 90 mmHg)                                                                                                                                                     | -0.0011 (-0.0012, -0.0011)    |
| Mean age of age group (centred at 50 years)                                                                                                                                                                                   | 2.0e-05 (1.8e-05, 2.1e-05)    |
| Male sex                                                                                                                                                                                                                      | -8.0e-05 (-0.00011, -4.8e-05) |
| Study mid-year (per one more recent year since 1975)                                                                                                                                                                          | -3.0e-07 (-1.6e-06, 9.8e-07)  |
| Natural logarithm of per-capita gross domestic product                                                                                                                                                                        | -7.0e-06 (-2.6e-05, 1.2e-05)  |
| Probit-transformed prevalence (SBP $\geq$ 140 mmHg or DBP $\geq$ 90 mmHg or use of antihypertensive medication) * mean age of age group                                                                                       | 4.5e-05 (4.3e-05, 4.8e-05)    |
| Probit-transformed prevalence (SBP $\geq$ 140 mmHg or DBP $\geq$ 90 mmHg) * mean age of age group                                                                                                                             | -3.0e-05 (-3.2e-05, -2.7e-05) |
| Probit-transformed prevalence (SBP $\geq$ 140 mmHg or DBP $\geq$ 90 mmHg or use of antihypertensive medication) * male sex                                                                                                    | -0.00022 (-0.00031, -0.00014) |
| Probit-transformed prevalence (SBP $\geq$ 140 mmHg or DBP $\geq$ 90 mmHg) * male sex                                                                                                                                          | 0.00014 (4.9e-05, 0.00024)    |
| Random effects for regions                                                                                                                                                                                                    | Yes                           |
| <b>Number of data points used to fit the model = 8,885</b>                                                                                                                                                                    |                               |

Traditional  $R^2$  is not clearly defined for mixed-effect models. The conditional  $R^2$  for the model, which describes the proportion of variance explained by both fixed and random factors,<sup>11</sup> was 0.762.

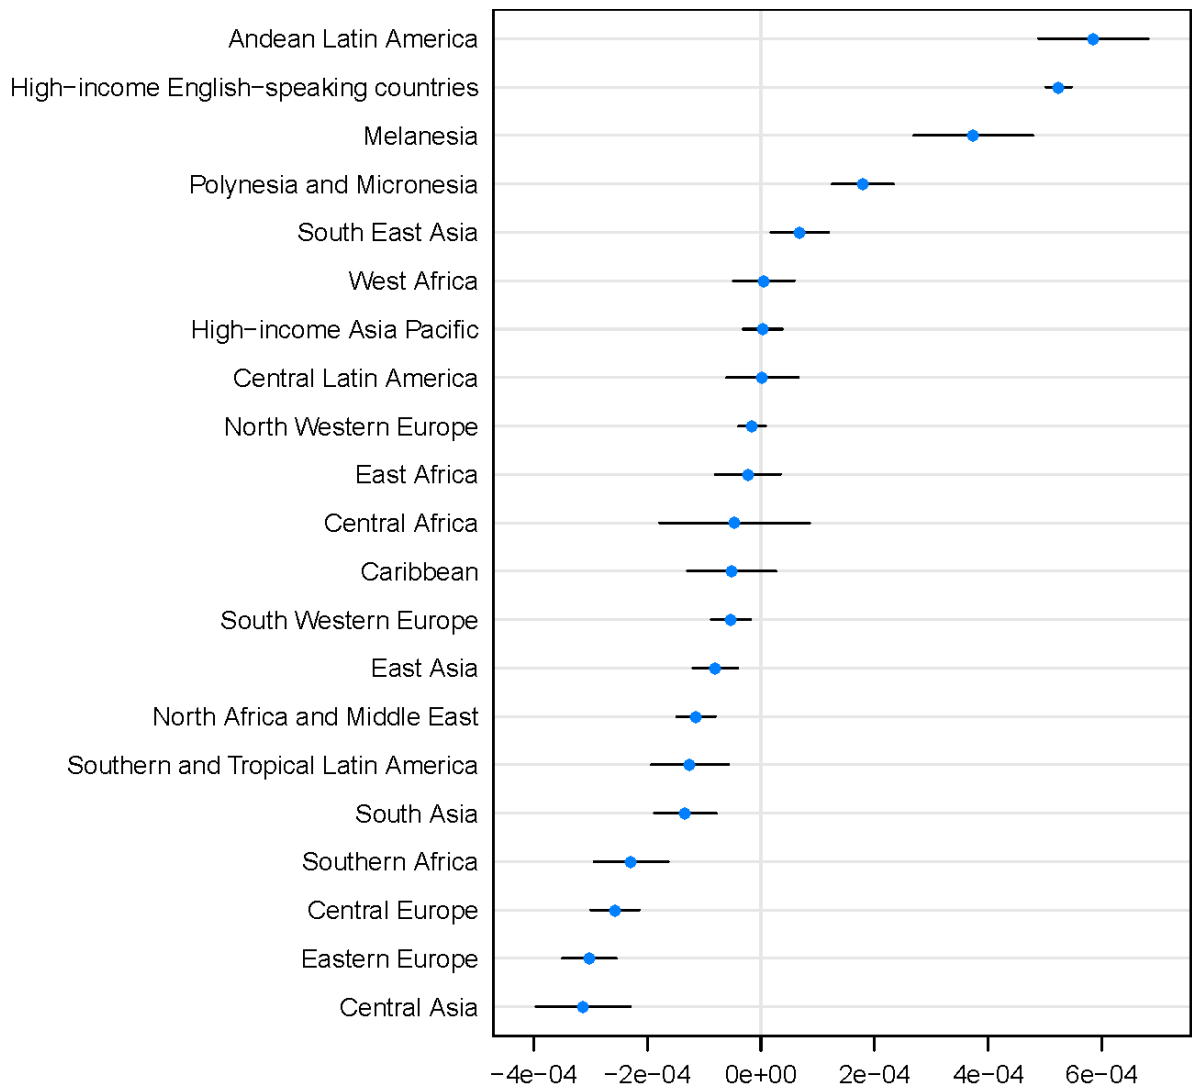



| <b>Primary outcome: mean DBP</b>                                                       |                               |
|----------------------------------------------------------------------------------------|-------------------------------|
| <b>Independent variables: prevalence (SBP ≥160 mmHg) and prevalence (DBP ≥95 mmHg)</b> |                               |
| <b>Variables</b>                                                                       | <b>Coefficients (95% CI)</b>  |
| Intercept                                                                              | 0.010 (0.010, 0.011)          |
| Probit-transformed prevalence (SBP ≥160 mmHg)                                          | -0.00010 (-0.00014, -6.5e-05) |
| Probit-transformed prevalence (DBP ≥95 mmHg)                                           | -0.0014 (-0.0014, -0.0014)    |
| Mean age of age group (centred at 50 years)                                            | 4.8e-06 (2.8e-06, 6.8e-06)    |
| Male sex                                                                               | 2.9e-05 (-2.2e-05, 8.0e-05)   |
| Study mid-year (per one more recent year since 1975)                                   | 1.9e-06 (7.9e-07, 3.0e-06)    |
| Natural logarithm of per-capita gross domestic product                                 | -5.9e-06 (-2.3e-05, 1.1e-05)  |
| Probit-transformed prevalence (SBP ≥160 mmHg) * mean age of age group                  | 8.5e-06 (7.4e-06, 9.6e-06)    |
| Probit-transformed prevalence (DBP ≥95 mmHg) * mean age of age group                   | -7.5e-06 (-8.8e-06, -6.3e-06) |
| Probit-transformed prevalence (SBP ≥160 mmHg) * male sex                               | 7.8e-05 (4.5e-05, 0.00011)    |
| Probit-transformed prevalence (DBP ≥95 mmHg) * male sex                                | 5.9e-06 (-3.6e-05, 4.7e-05)   |
| Random effects for regions                                                             | Yes                           |
| <b>Number of data points used to fit the model = 6,257</b>                             |                               |

Traditional  $R^2$  is not clearly defined for mixed-effect models. The conditional  $R^2$  for the model, which describes the proportion of variance explained by both fixed and random factors,<sup>11</sup> was 0.850.

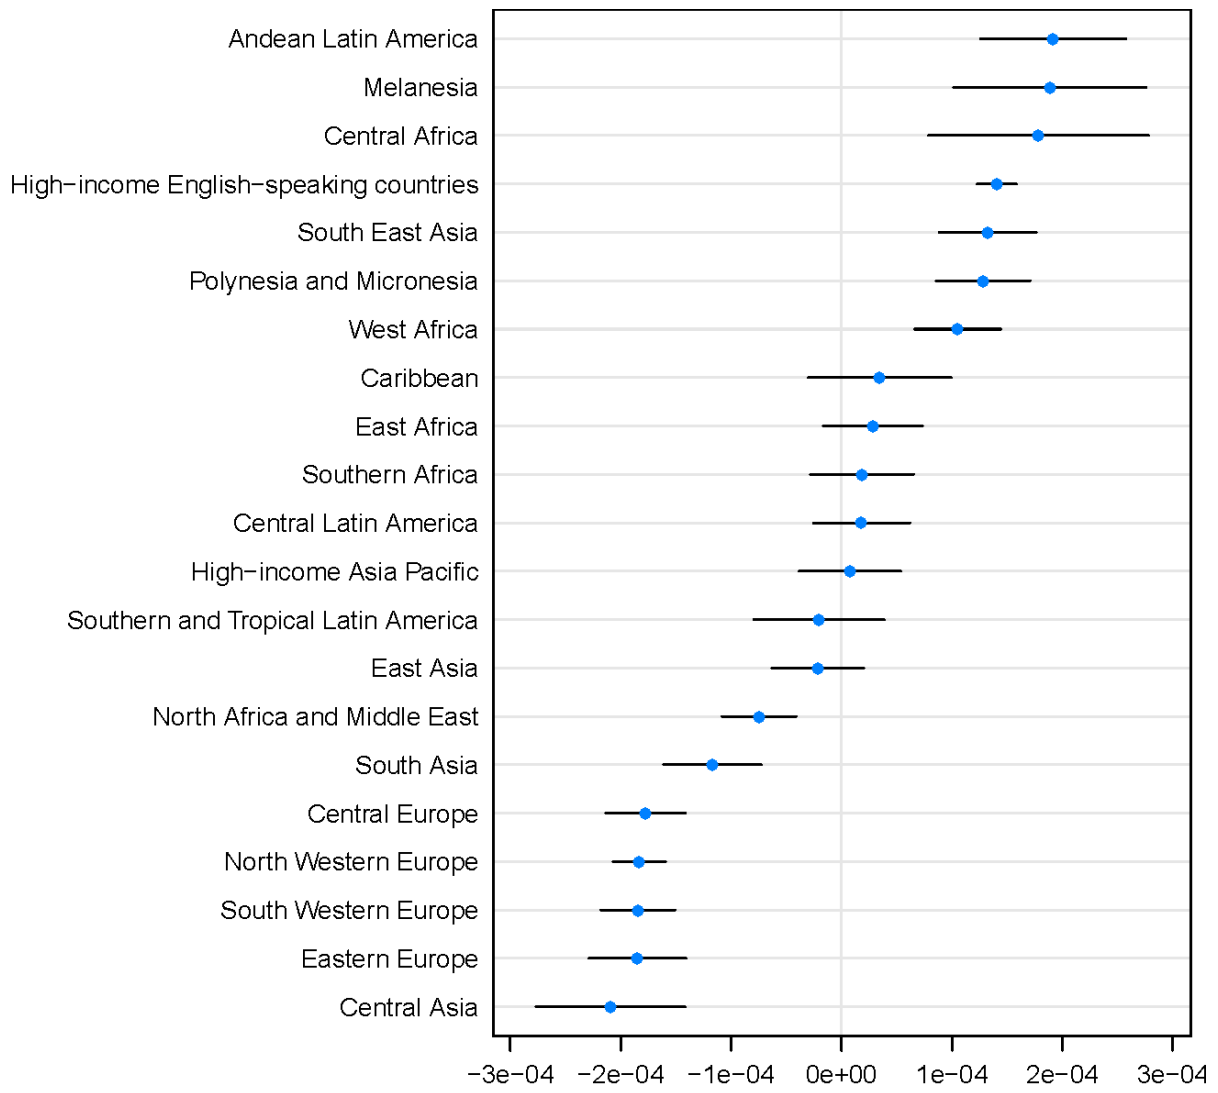

| <b>Primary outcome: mean DBP</b>                                                                                                                            |                               |
|-------------------------------------------------------------------------------------------------------------------------------------------------------------|-------------------------------|
| <b>Independent variables: mean SBP and prevalence (SBP <math>\geq</math>140 mmHg or DBP <math>\geq</math>90 mmHg or use of antihypertensive medication)</b> |                               |
| <b>Variables</b>                                                                                                                                            | <b>Coefficients (95% CI)</b>  |
| Intercept                                                                                                                                                   | 0.012 (0.012, 0.012)          |
| Mean SBP (centred at 130 mmHg)                                                                                                                              | -5.3e-05 (-5.6e-05, -5.0e-05) |
| Probit-transformed prevalence (SBP $\geq$ 140 mmHg or DBP $\geq$ 90 mmHg or use of antihypertensive medication)                                             | -0.00030 (-0.00035, -0.00024) |
| Mean age of age group (centred at 50 years)                                                                                                                 | 3.8e-05 (3.6e-05, 3.9e-05)    |
| Male sex                                                                                                                                                    | -0.00024 (-0.00027, -0.00021) |
| Study mid-year (per one more recent year since 1975)                                                                                                        | 3.6e-06 (2.3e-06, 4.9e-06)    |
| Natural logarithm of per-capita gross domestic product                                                                                                      | 1.3e-05 (-6.9e-06, 3.3e-05)   |
| Mean SBP * mean age of age group                                                                                                                            | -8.6e-07 (-9.7e-07, -7.4e-07) |
| Probit-transformed prevalence * mean age of age group                                                                                                       | 3.9e-05 (3.7e-05, 4.0e-05)    |
| Mean SBP * male sex                                                                                                                                         | 2.1e-05 (1.7e-05, 2.5e-05)    |
| Probit-transformed prevalence * male sex                                                                                                                    | -0.00046 (-0.00052, -0.00040) |
| Random effects for regions                                                                                                                                  | Yes                           |
| <b>Number of data points used to fit the model = 9,124</b>                                                                                                  |                               |

Traditional  $R^2$  is not clearly defined for mixed-effect models. The conditional  $R^2$  for the model, which describes the proportion of variance explained by both fixed and random factors,<sup>11</sup> was 0.735.

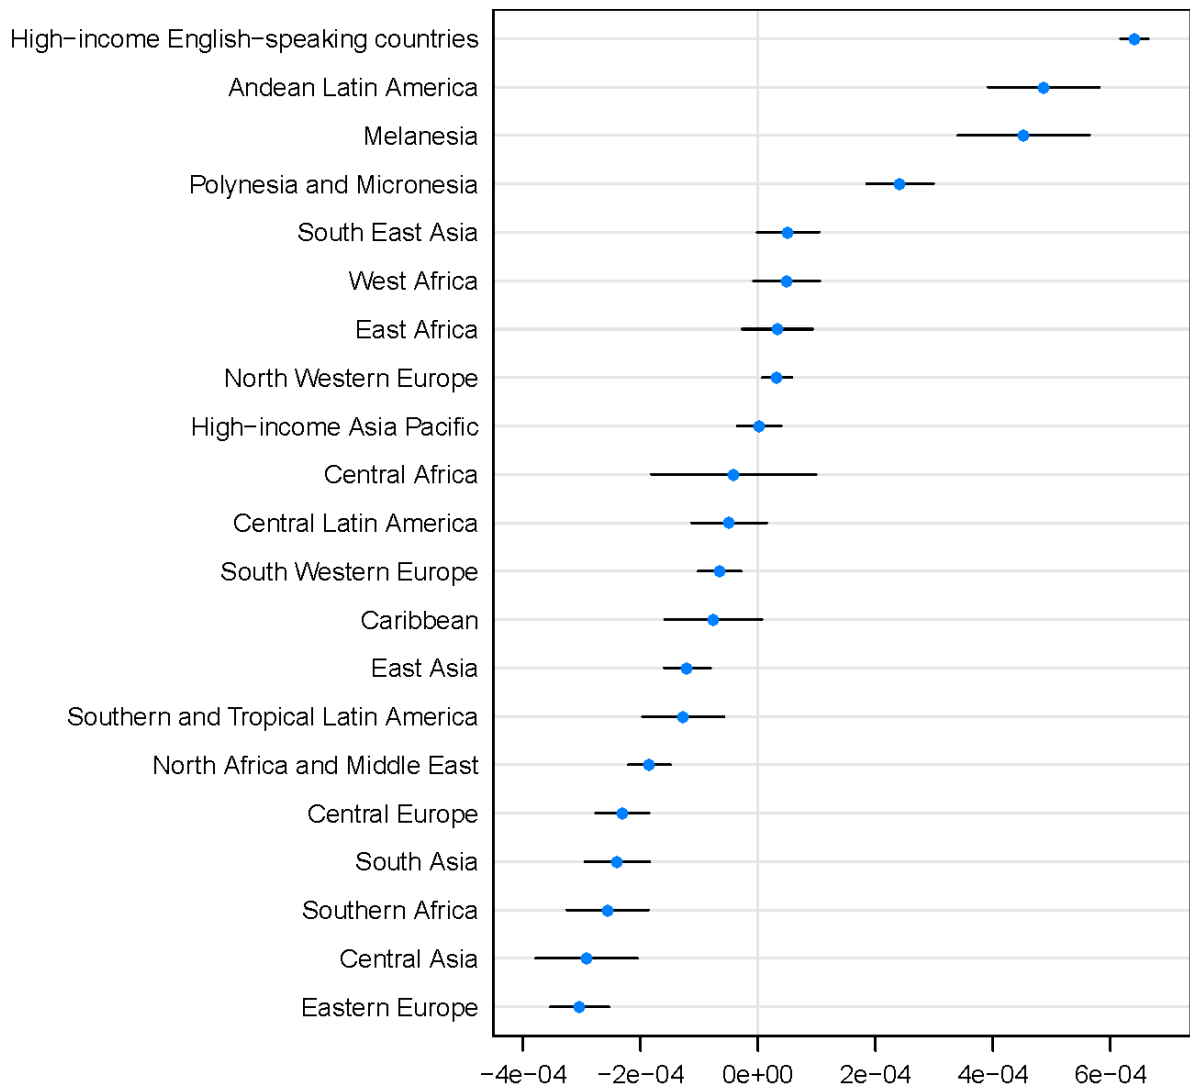

| <b>Primary outcome: mean DBP</b>                                                                                                                            |                               |
|-------------------------------------------------------------------------------------------------------------------------------------------------------------|-------------------------------|
| <b>Independent variables: mean SBP and prevalence (SBP <math>\geq</math>160 mmHg or DBP <math>\geq</math>95 mmHg or use of antihypertensive medication)</b> |                               |
| <b>Variables</b>                                                                                                                                            | <b>Coefficients (95% CI)</b>  |
| Intercept                                                                                                                                                   | 0.012 (0.012, 0.012)          |
| Mean SBP (centred at 130 mmHg)                                                                                                                              | -6.0e-05 (-6.3e-05, -5.8e-05) |
| Probit-transformed prevalence (SBP $\geq$ 160 mmHg or DBP $\geq$ 95 mmHg or use of antihypertensive medication)                                             | -0.00030 (-0.00034, -0.00026) |
| Mean age of age group (centred at 50 years)                                                                                                                 | 5.5e-05 (5.3e-05, 5.6e-05)    |
| Male sex                                                                                                                                                    | -0.00035 (-0.00039, -0.00031) |
| Study mid-year (per one more recent year since 1975)                                                                                                        | 5.0e-06 (3.7e-06, 6.2e-06)    |
| Natural logarithm of per-capita gross domestic product                                                                                                      | 1.0e-05 (-8.6e-06, 3.0e-05)   |
| Mean SBP * mean age of age group                                                                                                                            | -2.9e-07 (-3.7e-07, -2.0e-07) |
| Probit-transformed prevalence * mean age of age group                                                                                                       | 3.3e-05 (3.2e-05, 3.4e-05)    |
| Mean SBP * male sex                                                                                                                                         | 1.2e-05 (8.4e-06, 1.5e-05)    |
| Probit-transformed prevalence * male sex                                                                                                                    | -0.00026 (-0.00031, -0.00021) |
| Random effects for regions                                                                                                                                  | Yes                           |
| <b>Number of data points used to fit the model = 8,821</b>                                                                                                  |                               |

Traditional  $R^2$  is not clearly defined for mixed-effect models. The conditional  $R^2$  for the model, which describes the proportion of variance explained by both fixed and random factors,<sup>11</sup> was 0.752.

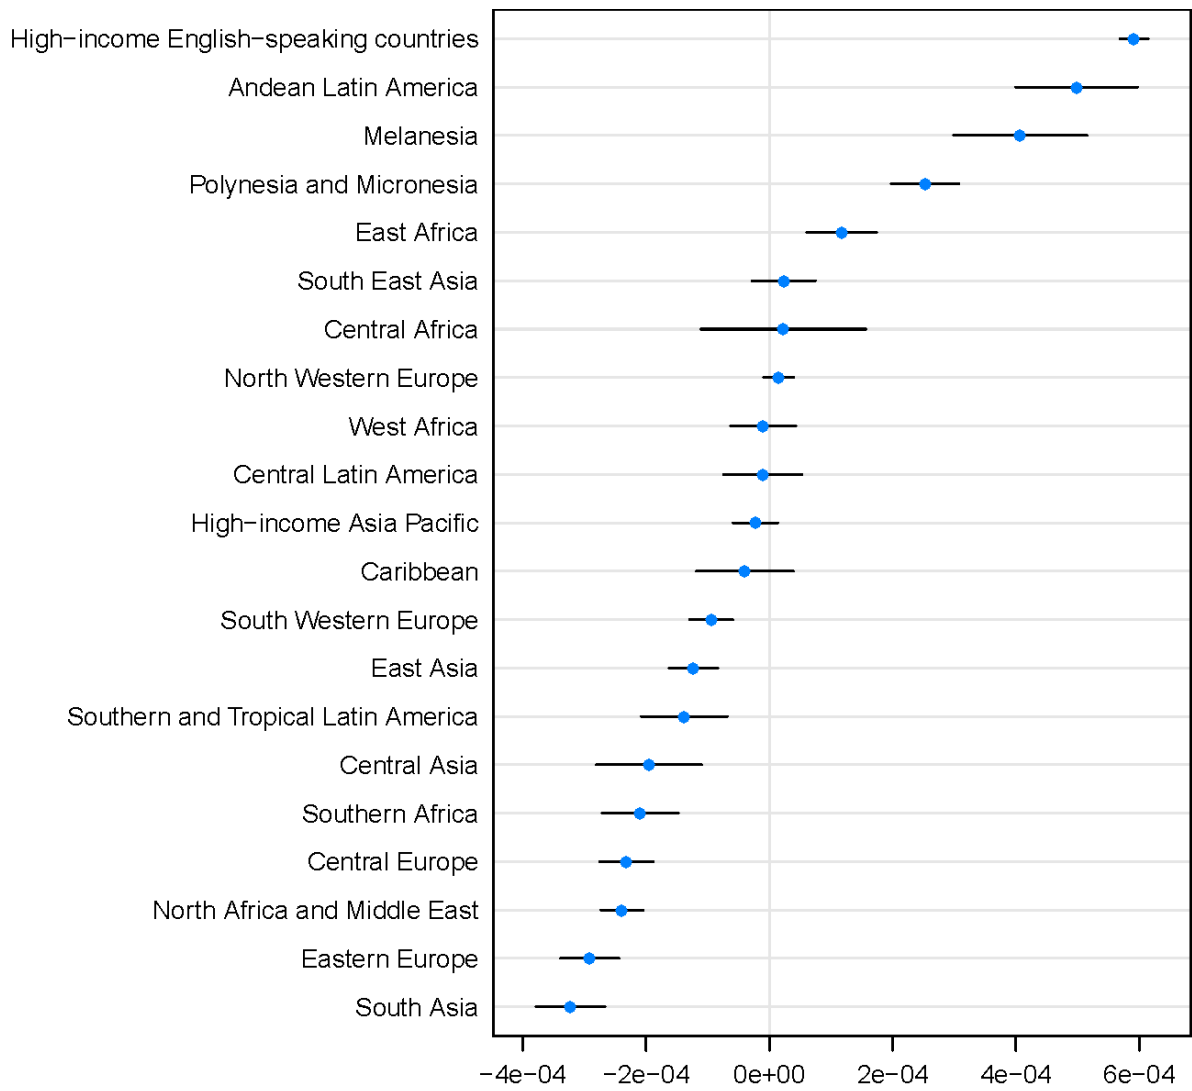

| <b>Primary outcome: mean DBP</b>                                      |                               |
|-----------------------------------------------------------------------|-------------------------------|
| <b>Independent variables: mean SBP and prevalence (SBP ≥160 mmHg)</b> |                               |
| <b>Variables</b>                                                      | <b>Coefficients (95% CI)</b>  |
| Intercept                                                             | 0.012 (0.012, 0.012)          |
| Mean SBP (centred at 130 mmHg)                                        | -7.4e-05 (-7.9e-05, -6.8e-05) |
| Probit-transformed prevalence (SBP ≥160 mmHg)                         | 5.6e-05 (-4.0e-05, 0.00015)   |
| Mean age of age group (centred at 50 years)                           | 8.0e-05 (7.5e-05, 8.5e-05)    |
| Male sex                                                              | -0.00051 (-0.00069, -0.00033) |
| Study mid-year (per one more recent year since 1975)                  | 9.9e-06 (8.1e-06, 1.2e-05)    |
| Natural logarithm of per-capita gross domestic product                | 8.9e-06 (-1.8e-05, 3.6e-05)   |
| Mean SBP * mean age of age group                                      | -5.3e-07 (-7.2e-07, -3.3e-07) |
| Probit-transformed prevalence * mean age of age group                 | 3.7e-05 (3.4e-05, 4.0e-05)    |
| Mean SBP * male sex                                                   | 7.9e-06 (8.2e-07, 1.5e-05)    |
| Probit-transformed prevalence * male sex                              | -0.00027 (-0.00039, -0.00016) |
| Random effects for regions                                            | Yes                           |
| <b>Number of data points used to fit the model = 6,423</b>            |                               |

Traditional  $R^2$  is not clearly defined for mixed-effect models. The conditional  $R^2$  for the model, which describes the proportion of variance explained by both fixed and random factors,<sup>11</sup> was 0.625.

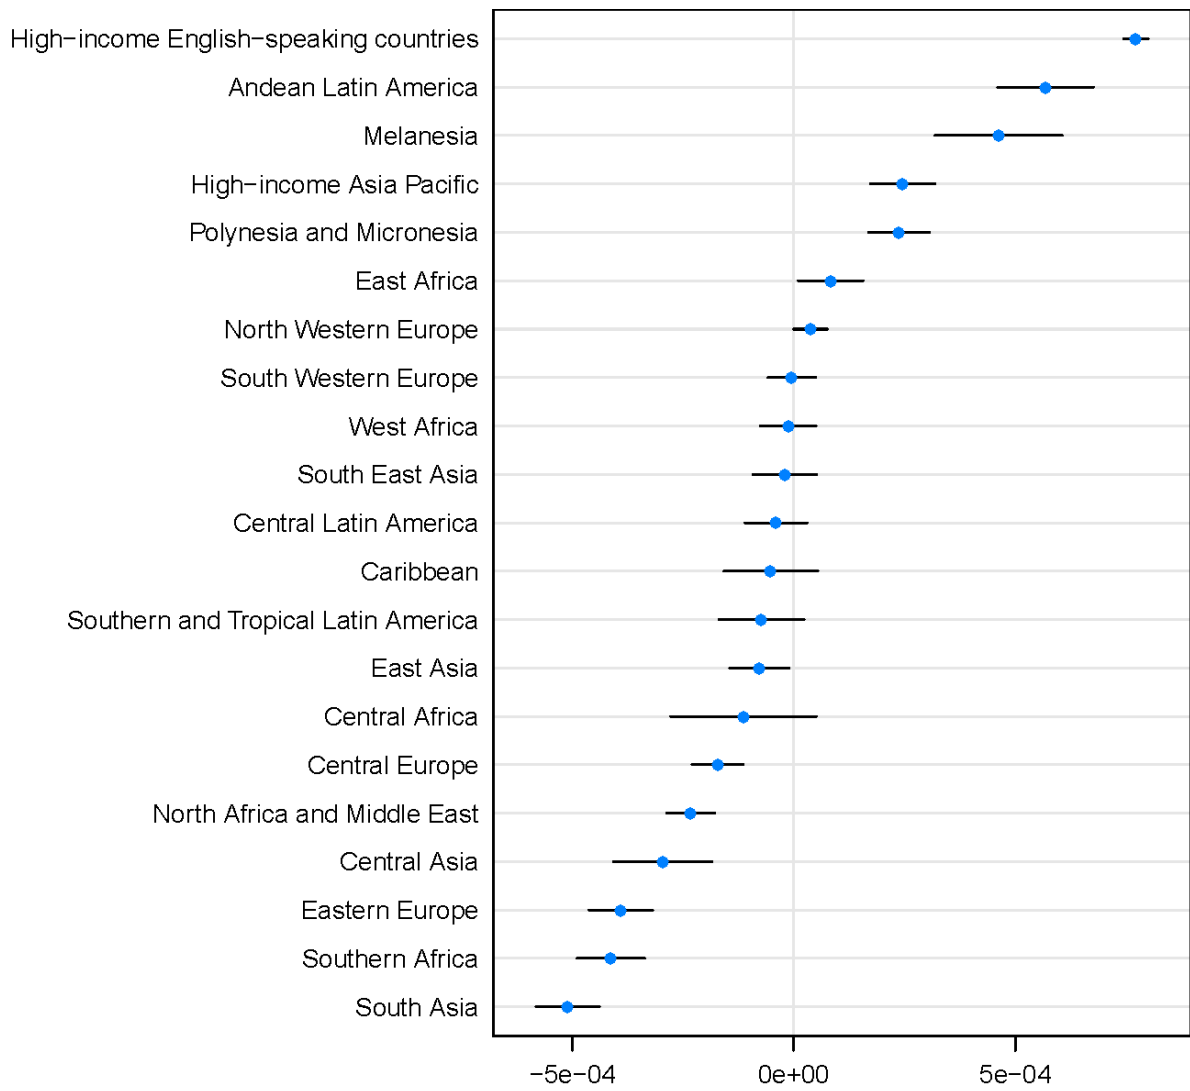



| <b>Primary outcome: mean DBP</b>                                                                                                                                                                   |                               |
|----------------------------------------------------------------------------------------------------------------------------------------------------------------------------------------------------|-------------------------------|
| <b>Independent variables: mean SBP, prevalence (SBP <math>\geq</math>140 mmHg or DBP <math>\geq</math>90 mmHg), and prevalence (SBP <math>\geq</math>160 mmHg or DBP <math>\geq</math>95 mmHg)</b> |                               |
| <b>Variables</b>                                                                                                                                                                                   | <b>Coefficients (95% CI)</b>  |
| Intercept                                                                                                                                                                                          | 0.011 (0.011, 0.011)          |
| Mean SBP (centred at 130 mmHg)                                                                                                                                                                     | 5.2e-06 (4.7e-07, 9.9e-06)    |
| Probit-transformed prevalence (SBP $\geq$ 140 mmHg or DBP $\geq$ 90 mmHg)                                                                                                                          | -0.00065 (-0.00075, -0.00054) |
| Probit-transformed prevalence (SBP $\geq$ 160 mmHg or DBP $\geq$ 95 mmHg)                                                                                                                          | -0.00099 (-0.0011, -0.00091)  |
| Mean age of age group (centred at 50 years)                                                                                                                                                        | 1.5e-05 (1.1e-05, 1.8e-05)    |
| Male sex                                                                                                                                                                                           | -0.00045 (-0.00055, -0.00035) |
| Study mid-year (per one more recent year since 1975)                                                                                                                                               | 6.3e-07 (-7.7e-07, 2.0e-06)   |
| Natural logarithm of per-capita gross domestic product                                                                                                                                             | 1.4e-05 (-7.2e-06, 3.5e-05)   |
| Mean SBP * mean age of age group                                                                                                                                                                   | 1.5e-06 (1.4e-06, 1.7e-06)    |
| Probit-transformed prevalence (SBP $\geq$ 140 mmHg or DBP $\geq$ 90 mmHg) * mean age of age group                                                                                                  | -4.4e-06 (-7.9e-06, -9.4e-07) |
| Probit-transformed prevalence (SBP $\geq$ 160 mmHg or DBP $\geq$ 95 mmHg) * mean age of age group                                                                                                  | -7.1e-06 (-9.9e-06, -4.3e-06) |
| Mean SBP * male sex                                                                                                                                                                                | 7.6e-06 (1.9e-06, 1.3e-05)    |
| Probit-transformed prevalence (SBP $\geq$ 140 mmHg or DBP $\geq$ 90 mmHg) * male sex                                                                                                               | 1.6e-05 (-0.00012, 0.00015)   |
| Probit-transformed prevalence (SBP $\geq$ 160 mmHg or DBP $\geq$ 95 mmHg) * male sex                                                                                                               | -0.00033 (-0.00044, -0.00023) |
| Random effects for regions                                                                                                                                                                         | Yes                           |
| <b>Number of data points used to fit the model = 7,329</b>                                                                                                                                         |                               |

Traditional  $R^2$  is not clearly defined for mixed-effect models. The conditional  $R^2$  for the model, which describes the proportion of variance explained by both fixed and random factors,<sup>11</sup> was 0.747.

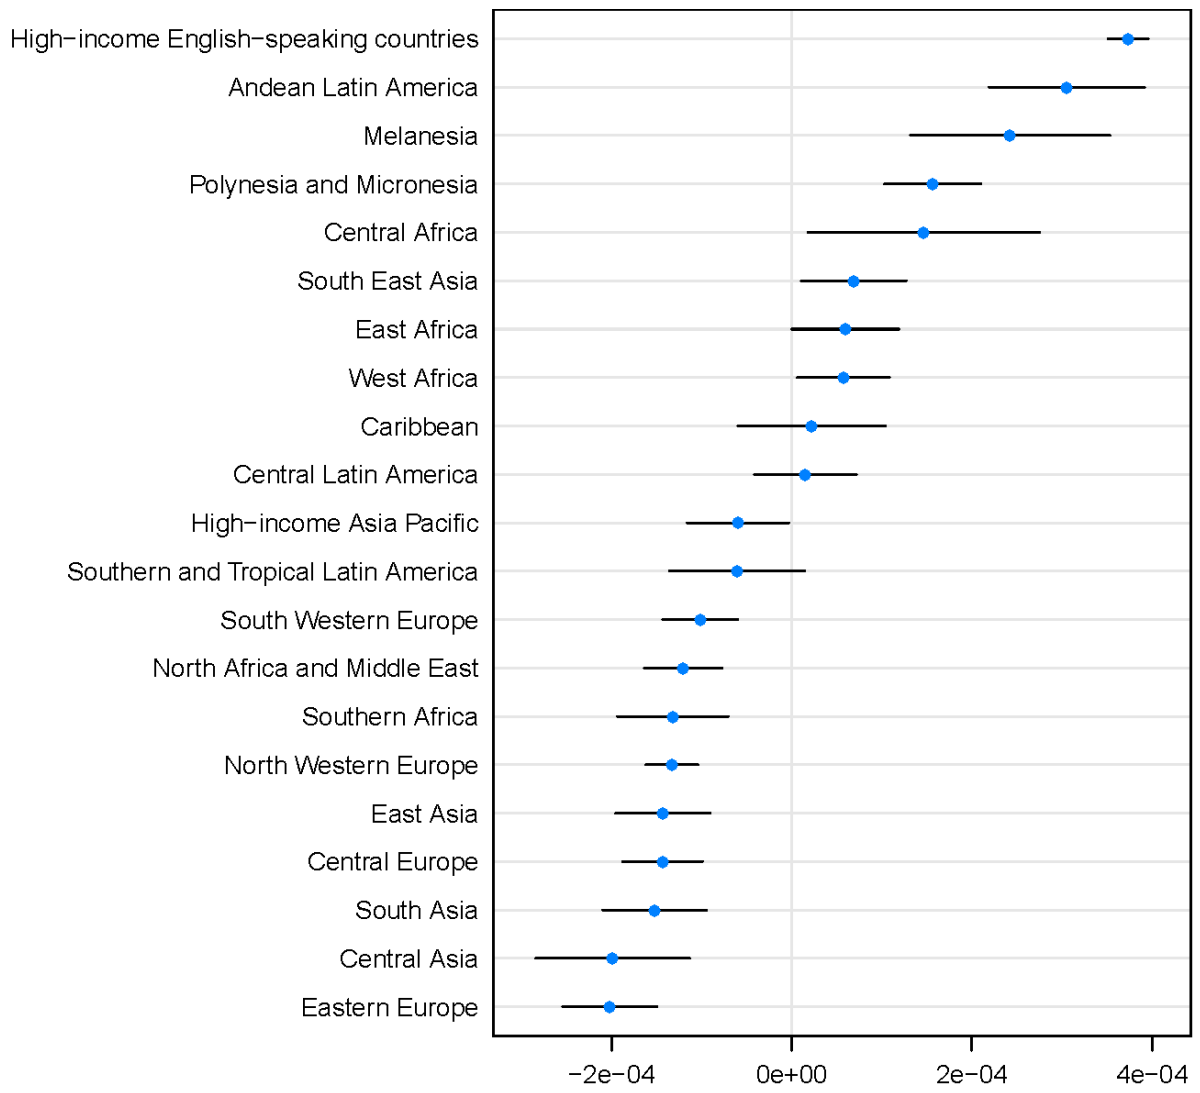

|                                                                                                                             |                               |
|-----------------------------------------------------------------------------------------------------------------------------|-------------------------------|
| <b>Primary outcome: prevalence of raised blood pressure (SBP <math>\geq</math>140 mmHg or DBP <math>\geq</math>90 mmHg)</b> |                               |
| <b>Independent variable: mean SBP</b>                                                                                       |                               |
| <b>Variables</b>                                                                                                            | <b>Coefficients (95% CI)</b>  |
| Intercept                                                                                                                   | -0.52 (-0.58, -0.47)          |
| Mean SBP (centred at 130 mmHg)                                                                                              | 0.047 (0.047, 0.047)          |
| Mean age of age group (centred at 50 years)                                                                                 | 0.0071 (0.0070, 0.0072)       |
| Male sex                                                                                                                    | 0.014 (0.012, 0.015)          |
| Study mid-year (per one more recent year since 1975)                                                                        | -0.0030 (-0.0031, -0.0028)    |
| Natural logarithm of per-capita gross domestic product                                                                      | 0.018 (0.015, 0.020)          |
| Mean SBP * mean age of age group                                                                                            | -0.00037 (-0.00038, -0.00037) |
| Mean SBP * male sex                                                                                                         | 0.0029 (0.0027, 0.0031)       |
| Random effects for regions                                                                                                  | Yes                           |
| <b>Number of data points used to fit the model = 10,974</b>                                                                 |                               |

Traditional  $R^2$  is not clearly defined for mixed-effect models. The pseudo- $R^2$  for the model, which describes the proportion of variance explained by both fixed and random factors,<sup>12</sup> was 0.909.

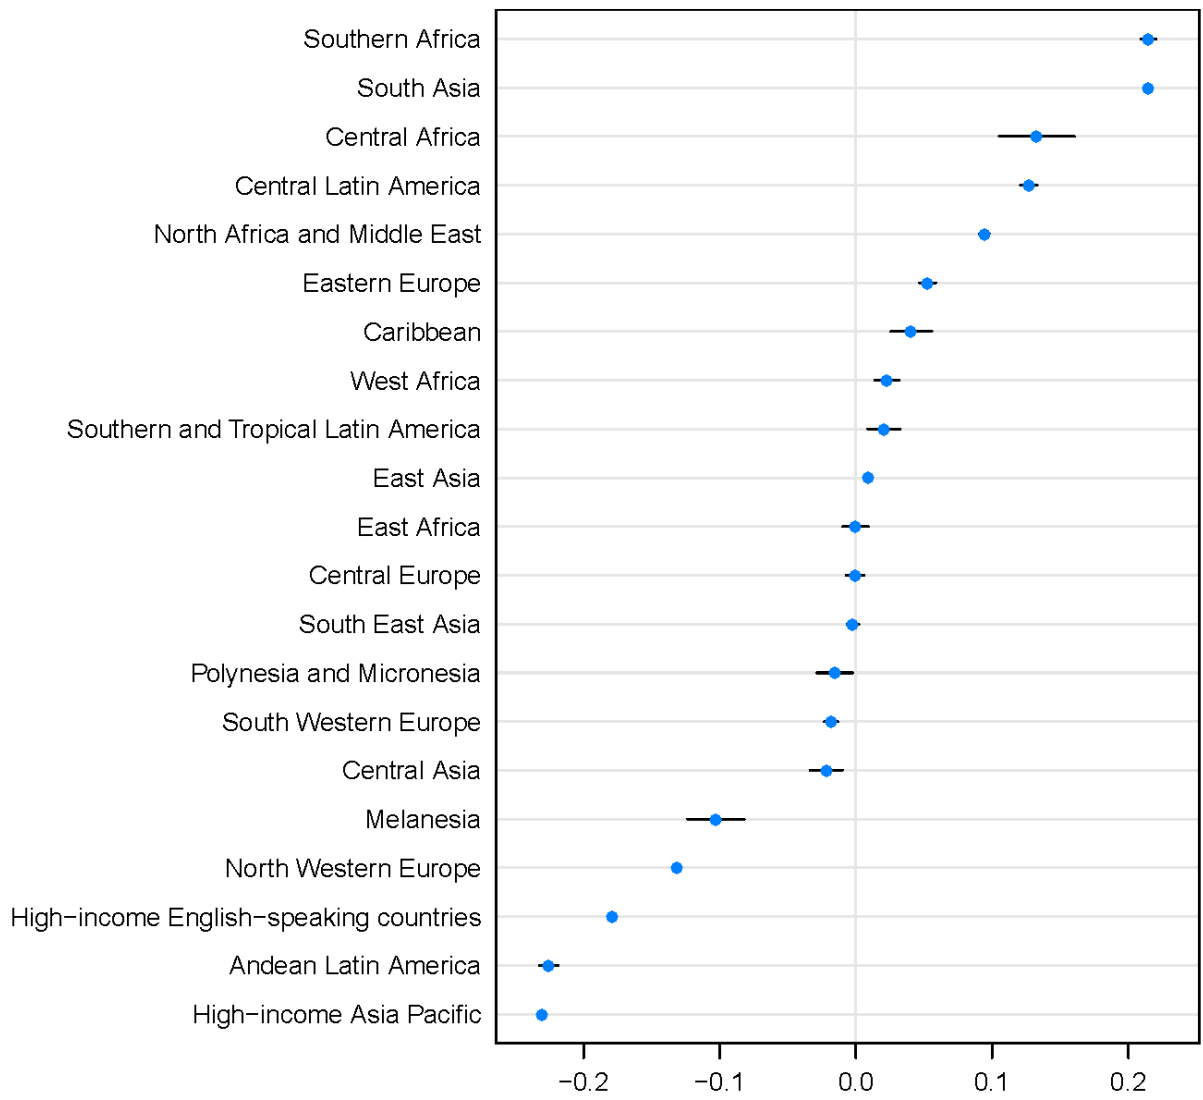

| <b>Primary outcome: prevalence of raised blood pressure (SBP <math>\geq</math>140 mmHg or DBP <math>\geq</math>90 mmHg)</b> |                               |
|-----------------------------------------------------------------------------------------------------------------------------|-------------------------------|
| <b>Independent variables: mean SBP and mean DBP</b>                                                                         |                               |
| <b>Variables</b>                                                                                                            | <b>Coefficients (95% CI)</b>  |
| Intercept                                                                                                                   | -0.33 (-0.36, -0.29)          |
| Mean SBP (centred at 130 mmHg)                                                                                              | 0.042 (0.042, 0.042)          |
| Mean DBP (centred at 80 mmHg)                                                                                               | 0.024 (0.024, 0.025)          |
| Mean age of age group (centred at 50 years)                                                                                 | 0.0040 (0.0039, 0.0041)       |
| Male sex                                                                                                                    | -0.0097 (-0.012, -0.0078)     |
| Study mid-year (per one more recent year since 1975)                                                                        | -0.0034 (-0.0035, -0.0032)    |
| Natural logarithm of per-capita gross domestic product                                                                      | -0.0023 (-0.0047, 0.00014)    |
| Mean SBP * mean age of age group                                                                                            | -0.00018 (-0.00018, -0.00017) |
| Mean DBP * mean age of age group                                                                                            | -0.00026 (-0.00027, -0.00025) |
| Mean SBP * male sex                                                                                                         | 0.0045 (0.0042, 0.0048)       |
| Mean DBP * male sex                                                                                                         | -0.0071 (-0.0076, -0.0066)    |
| Random effects for regions                                                                                                  | Yes                           |
| <b>Number of data points used to fit the model = 10,965</b>                                                                 |                               |

Traditional  $R^2$  is not clearly defined for mixed-effect models. The pseudo- $R^2$  for the model, which describes the proportion of variance explained by both fixed and random factors,<sup>12</sup> was 0.929.

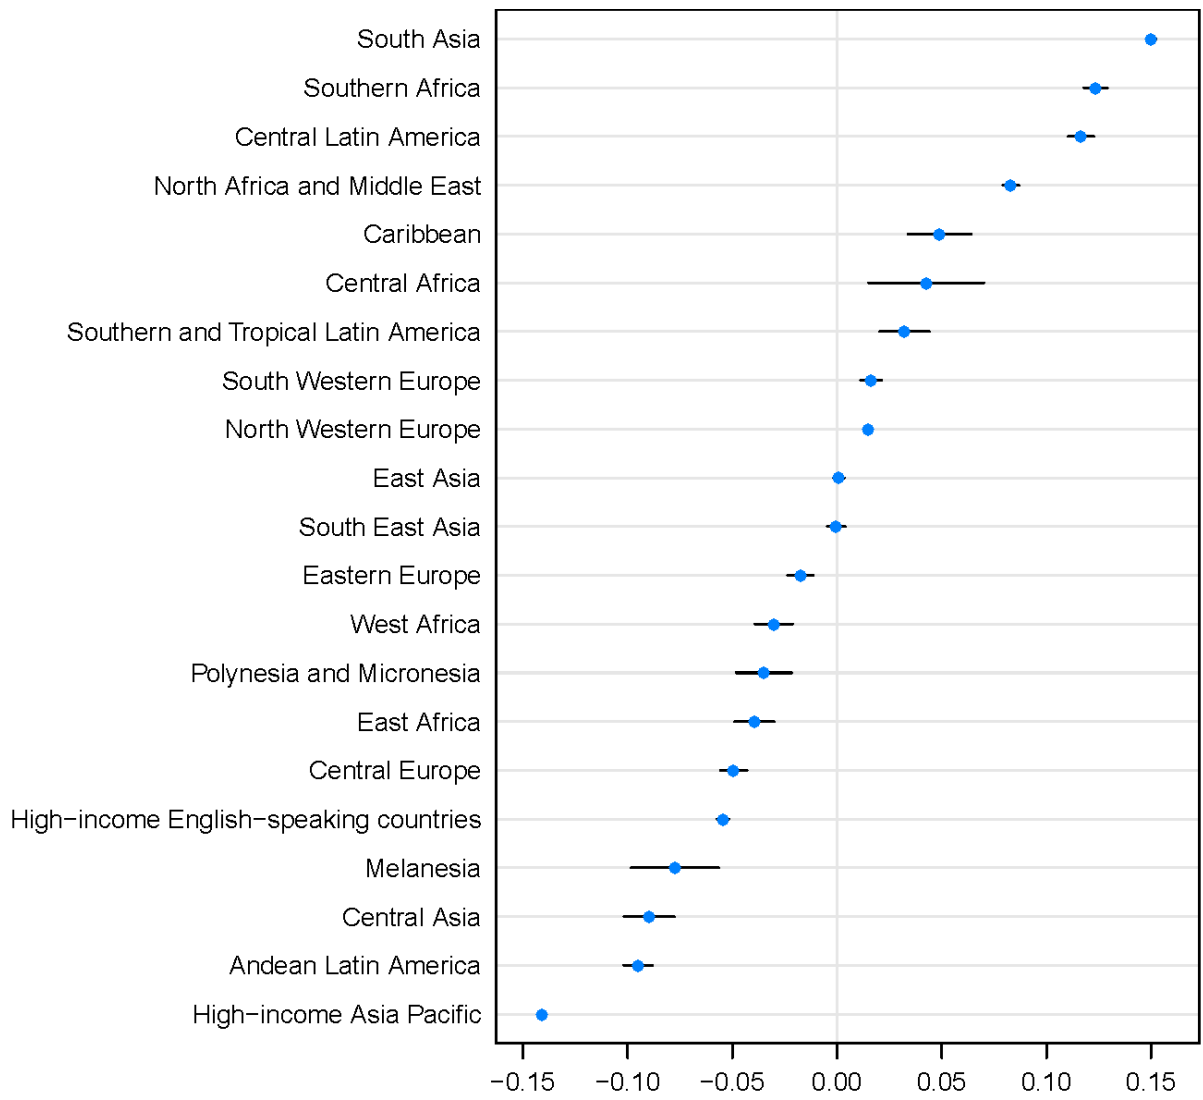

|                                                                                                                                               |                              |
|-----------------------------------------------------------------------------------------------------------------------------------------------|------------------------------|
| <b>Primary outcome: prevalence of raised blood pressure (SBP <math>\geq</math>140 mmHg or DBP <math>\geq</math>90 mmHg)</b>                   |                              |
| <b>Independent variable: prevalence (SBP <math>\geq</math>140 mmHg or DBP <math>\geq</math>90 mmHg or use of antihypertensive medication)</b> |                              |
| <b>Variables</b>                                                                                                                              | <b>Coefficients (95% CI)</b> |
| Intercept                                                                                                                                     | 0.10 (0.062, 0.14)           |
| Probit-transformed prevalence (SBP $\geq$ 140 mmHg or DBP $\geq$ 90 mmHg or use of antihypertensive medication)                               | 0.97 (0.97, 0.98)            |
| Mean age of age group (centred at 50 years)                                                                                                   | -0.0063 (-0.0065, -0.0061)   |
| Male sex                                                                                                                                      | 0.050 (0.048, 0.053)         |
| Study mid-year (per one more recent year since 1975)                                                                                          | -0.0070 (-0.0072, -0.0069)   |
| Natural logarithm of per-capita gross domestic product                                                                                        | -0.0085 (-0.011, -0.0057)    |
| Probit-transformed prevalence * mean age of age group                                                                                         | -0.0018 (-0.0019, -0.0017)   |
| Probit-transformed prevalence * male sex                                                                                                      | 0.031 (0.027, 0.035)         |
| Random effects for regions                                                                                                                    | Yes                          |
| <b>Number of data points used to fit the model = 8,651</b>                                                                                    |                              |

Traditional  $R^2$  is not clearly defined for mixed-effect models. The pseudo- $R^2$  for the model, which describes the proportion of variance explained by both fixed and random factors,<sup>12</sup> was 0.899.

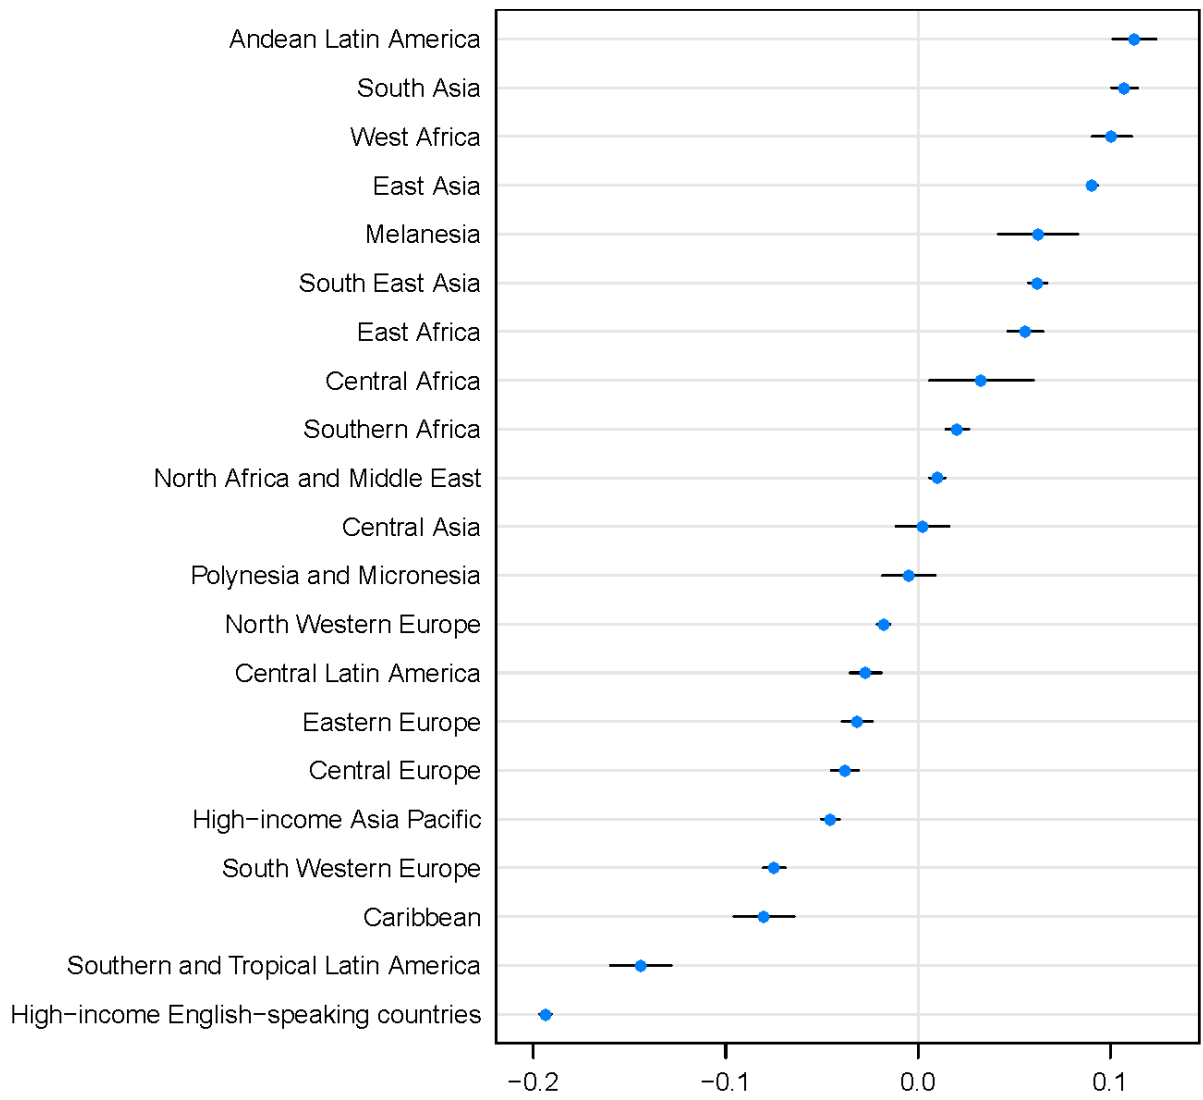



|                                                                                                                                               |                              |
|-----------------------------------------------------------------------------------------------------------------------------------------------|------------------------------|
| <b>Primary outcome: prevalence of raised blood pressure (SBP <math>\geq</math>140 mmHg or DBP <math>\geq</math>90 mmHg)</b>                   |                              |
| <b>Independent variable: prevalence (SBP <math>\geq</math>160 mmHg or DBP <math>\geq</math>95 mmHg or use of antihypertensive medication)</b> |                              |
| <b>Variables</b>                                                                                                                              | <b>Coefficients (95% CI)</b> |
| Intercept                                                                                                                                     | 0.027 (-0.031, 0.085)        |
| Probit-transformed prevalence (SBP $\geq$ 160 mmHg or DBP $\geq$ 95 mmHg or use of antihypertensive medication)                               | 0.68 (0.68, 0.69)            |
| Mean age of age group (centred at 50 years)                                                                                                   | 0.0036 (0.0034, 0.0038)      |
| Male sex                                                                                                                                      | 0.068 (0.064, 0.072)         |
| Study mid-year (per one more recent year since 1975)                                                                                          | -0.012 (-0.012, -0.012)      |
| Natural logarithm of per-capita gross domestic product                                                                                        | 0.039 (0.036, 0.042)         |
| Probit-transformed prevalence * mean age of age group                                                                                         | -0.0029 (-0.0030, -0.0028)   |
| Probit-transformed prevalence * male sex                                                                                                      | -0.079 (-0.083, -0.076)      |
| Random effects for regions                                                                                                                    | Yes                          |
| <b>Number of data points used to fit the model = 8,681</b>                                                                                    |                              |

Traditional  $R^2$  is not clearly defined for mixed-effect models. The pseudo- $R^2$  for the model, which describes the proportion of variance explained by both fixed and random factors,<sup>12</sup> was 0.811.

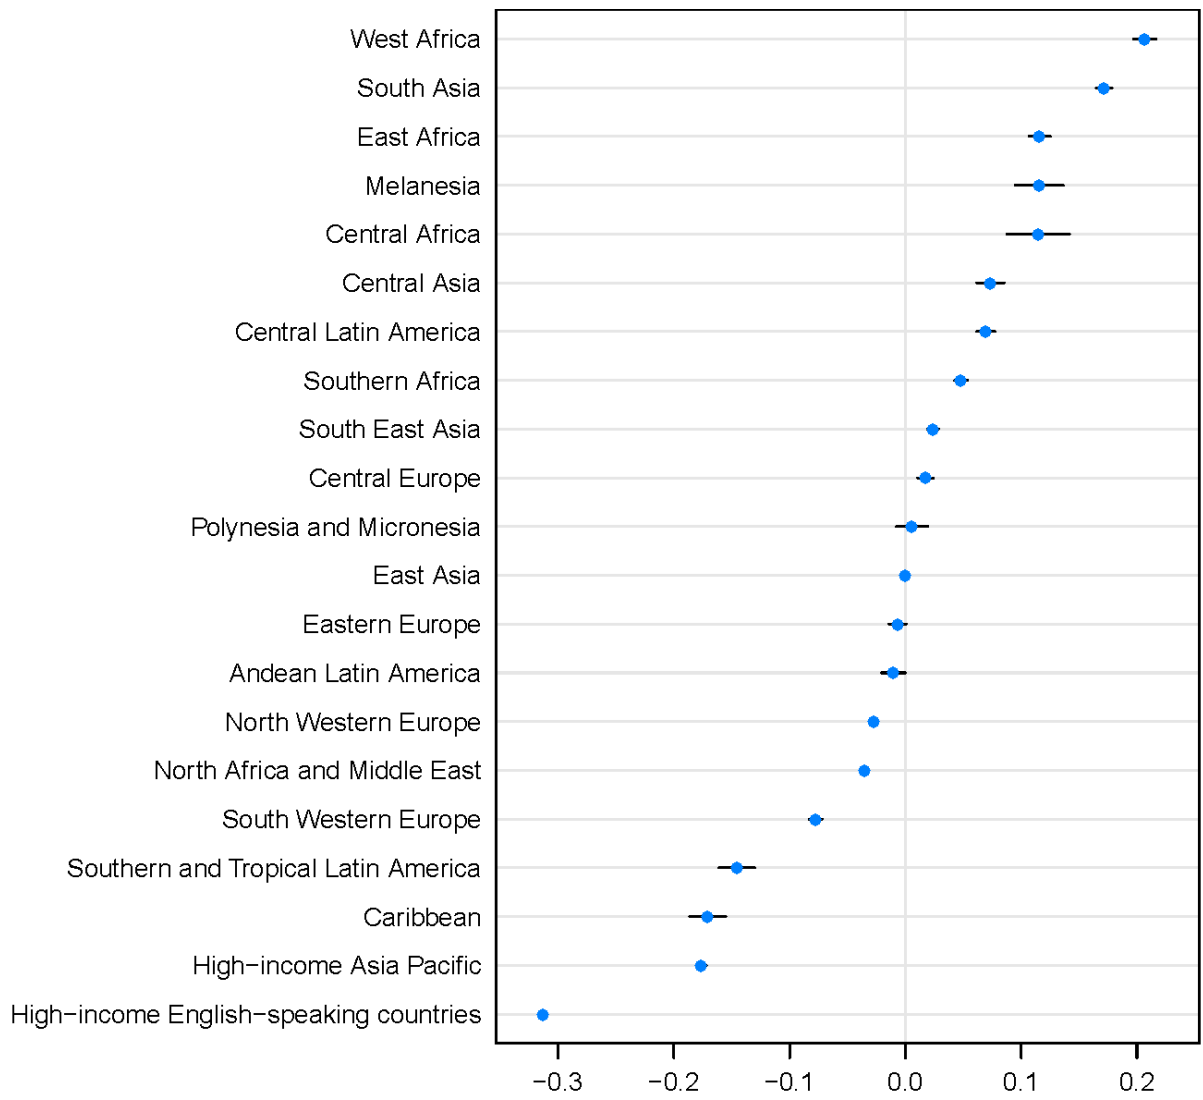

|                                                                                                                             |                               |
|-----------------------------------------------------------------------------------------------------------------------------|-------------------------------|
| <b>Primary outcome: prevalence of raised blood pressure (SBP <math>\geq</math>140 mmHg or DBP <math>\geq</math>90 mmHg)</b> |                               |
| <b>Independent variable: prevalence (SBP <math>\geq</math>130 mmHg or DBP <math>\geq</math>85 mmHg)</b>                     |                               |
| <b>Variables</b>                                                                                                            | <b>Coefficients (95% CI)</b>  |
| Intercept                                                                                                                   | -0.27 (-0.31, -0.23)          |
| Probit-transformed prevalence (SBP $\geq$ 130 mmHg or DBP $\geq$ 85 mmHg)                                                   | 0.89 (0.89, 0.90)             |
| Mean age of age group (centred at 50 years)                                                                                 | 0.0040 (0.0039, 0.0042)       |
| Male sex                                                                                                                    | -0.039 (-0.041, -0.036)       |
| Study mid-year (per one more recent year since 1975)                                                                        | -0.0033 (-0.0035, -0.0030)    |
| Natural logarithm of per-capita gross domestic product                                                                      | -0.012 (-0.016, -0.0085)      |
| Probit-transformed prevalence * mean age of age group                                                                       | -0.00048 (-0.00063, -0.00033) |
| Probit-transformed prevalence * male sex                                                                                    | 0.029 (0.024, 0.034)          |
| Random effects for regions                                                                                                  | Yes                           |
| <b>Number of data points used to fit the model = 7,463</b>                                                                  |                               |

Traditional  $R^2$  is not clearly defined for mixed-effect models. The pseudo- $R^2$  for the model, which describes the proportion of variance explained by both fixed and random factors,<sup>12</sup> was 0.930.

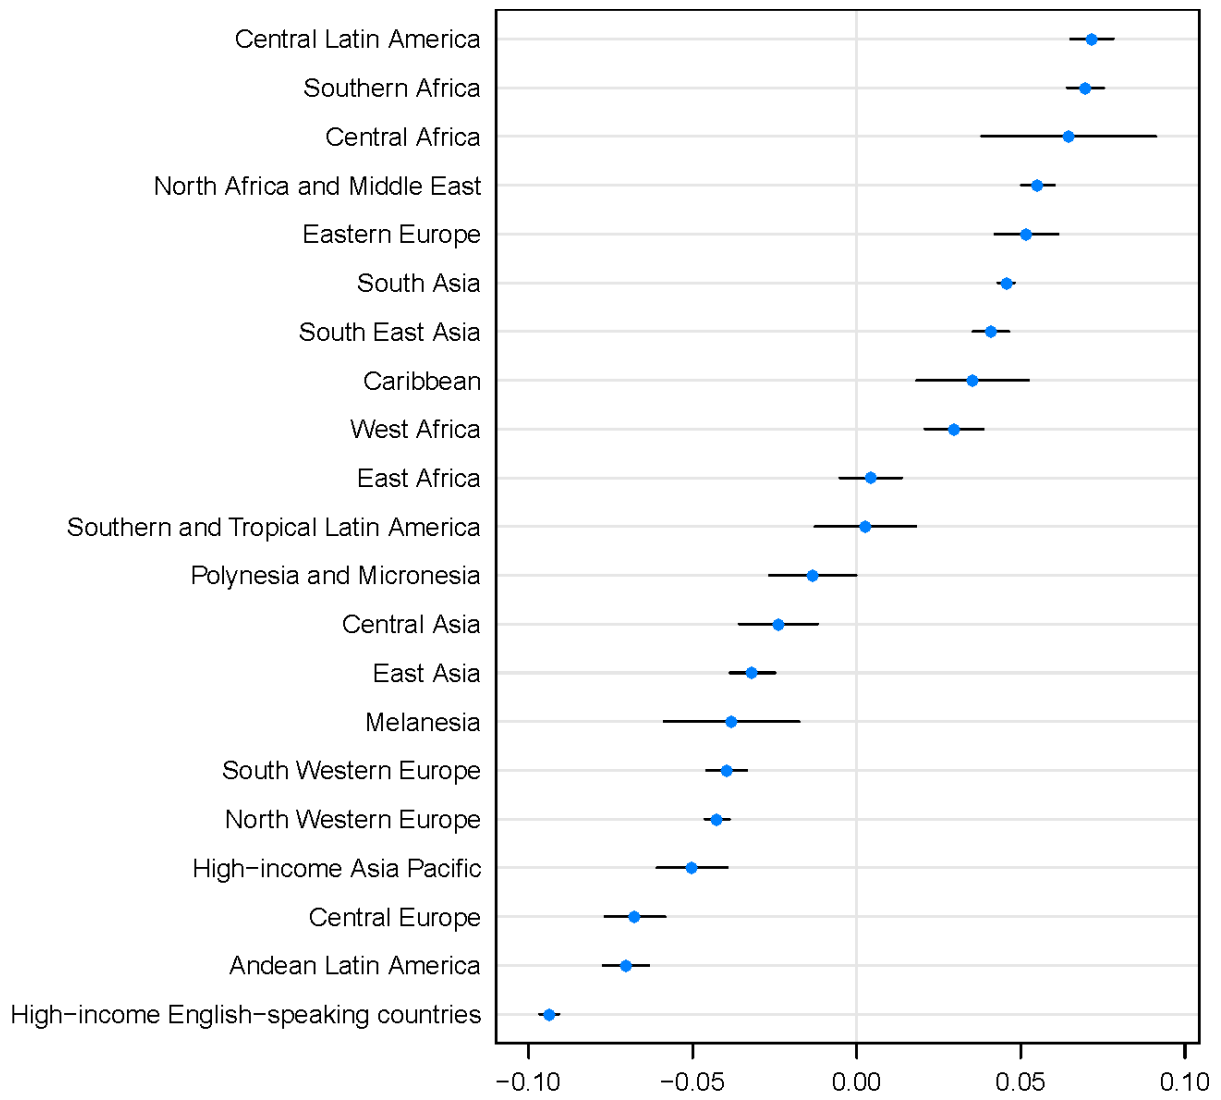

|                                                                                                                             |                              |
|-----------------------------------------------------------------------------------------------------------------------------|------------------------------|
| <b>Primary outcome: prevalence of raised blood pressure (SBP <math>\geq</math>140 mmHg or DBP <math>\geq</math>90 mmHg)</b> |                              |
| <b>Independent variable: prevalence (SBP <math>\geq</math>150 mmHg or DBP <math>\geq</math>90 mmHg)</b>                     |                              |
| <b>Variables</b>                                                                                                            | <b>Coefficients (95% CI)</b> |
| Intercept                                                                                                                   | 0.085 (0.046, 0.12)          |
| Probit-transformed prevalence (SBP $\geq$ 150 mmHg or DBP $\geq$ 90 mmHg)                                                   | 1.01 (1.00, 1.01)            |
| Mean age of age group (centred at 50 years)                                                                                 | 0.0060 (0.0058, 0.0062)      |
| Male sex                                                                                                                    | -0.034 (-0.039, -0.030)      |
| Study mid-year (per one more recent year since 1975)                                                                        | 0.0014 (0.0012, 0.0016)      |
| Natural logarithm of per-capita gross domestic product                                                                      | 0.0068 (0.0032, 0.010)       |
| Probit-transformed prevalence * mean age of age group                                                                       | 0.0020 (0.0019, 0.0022)      |
| Probit-transformed prevalence * male sex                                                                                    | -0.088 (-0.094, -0.083)      |
| Random effects for regions                                                                                                  | Yes                          |
| <b>Number of data points used to fit the model = 7,412</b>                                                                  |                              |

Traditional  $R^2$  is not clearly defined for mixed-effect models. The pseudo- $R^2$  for the model, which describes the proportion of variance explained by both fixed and random factors,<sup>12</sup> was 0.932.

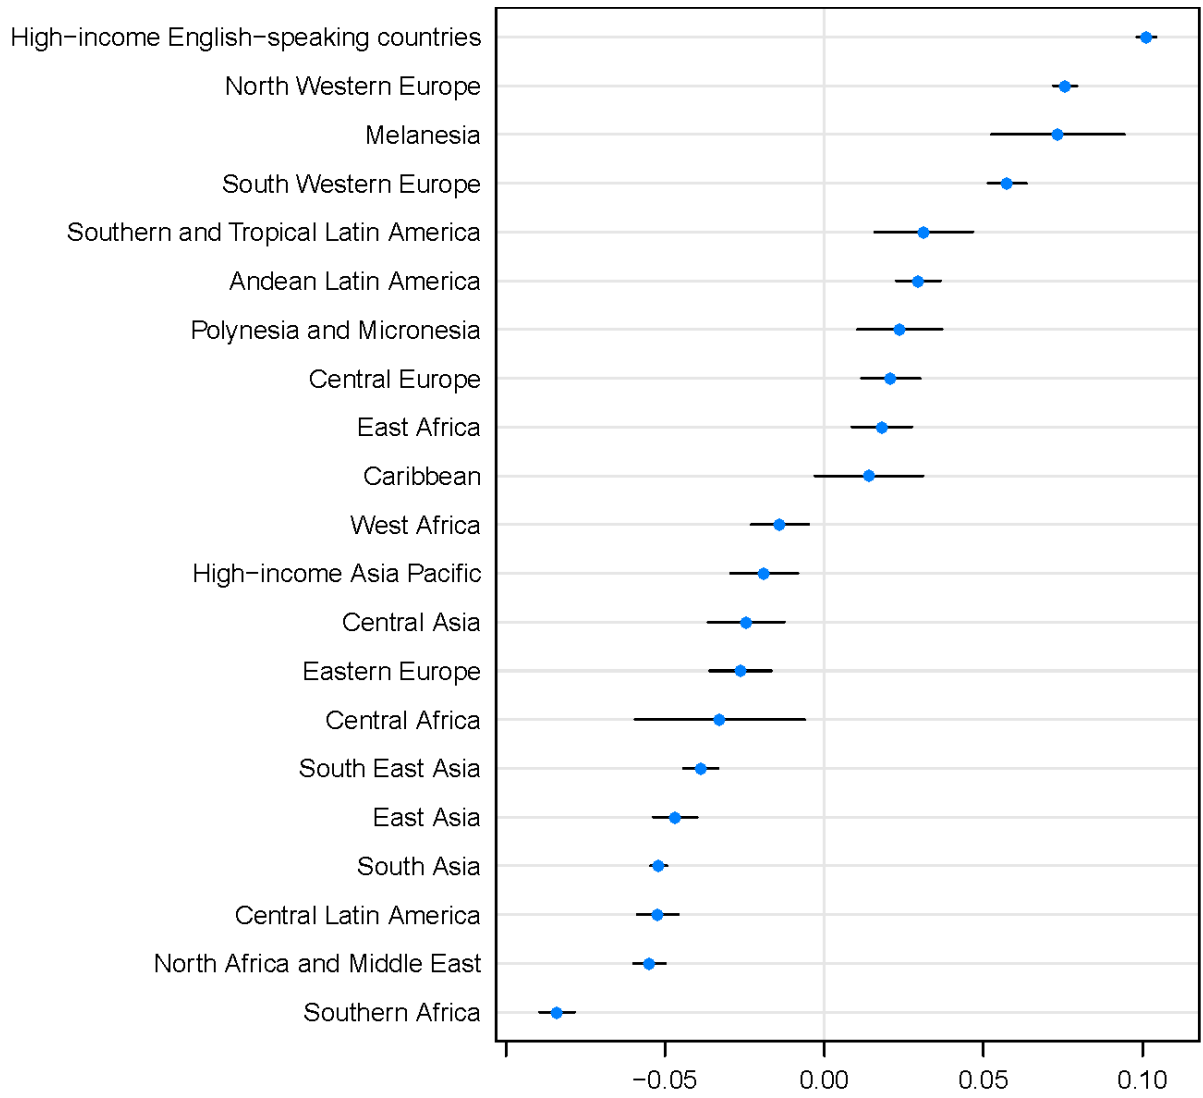

|                                                                                                                             |                              |
|-----------------------------------------------------------------------------------------------------------------------------|------------------------------|
| <b>Primary outcome: prevalence of raised blood pressure (SBP <math>\geq</math>140 mmHg or DBP <math>\geq</math>90 mmHg)</b> |                              |
| <b>Independent variable: prevalence (SBP <math>\geq</math>160 mmHg or DBP <math>\geq</math>90 mmHg)</b>                     |                              |
| <b>Variables</b>                                                                                                            | <b>Coefficients (95% CI)</b> |
| Intercept                                                                                                                   | 0.059 (0.016, 0.10)          |
| Probit-transformed prevalence (SBP $\geq$ 160 mmHg or DBP $\geq$ 90 mmHg)                                                   | 0.93 (0.93, 0.94)            |
| Mean age of age group (centred at 50 years)                                                                                 | 0.012 (0.012, 0.012)         |
| Male sex                                                                                                                    | -0.078 (-0.083, -0.072)      |
| Study mid-year (per one more recent year since 1975)                                                                        | 0.0011 (0.00090, 0.0014)     |
| Natural logarithm of per-capita gross domestic product                                                                      | 0.014 (0.011, 0.018)         |
| Probit-transformed prevalence * mean age of age group                                                                       | 0.0025 (0.0023, 0.0026)      |
| Probit-transformed prevalence * male sex                                                                                    | -0.15 (-0.15, -0.14)         |
| Random effects for regions                                                                                                  | Yes                          |
| <b>Number of data points used to fit the model = 7,389</b>                                                                  |                              |

Traditional  $R^2$  is not clearly defined for mixed-effect models. The pseudo- $R^2$  for the model, which describes the proportion of variance explained by both fixed and random factors,<sup>12</sup> was 0.905.

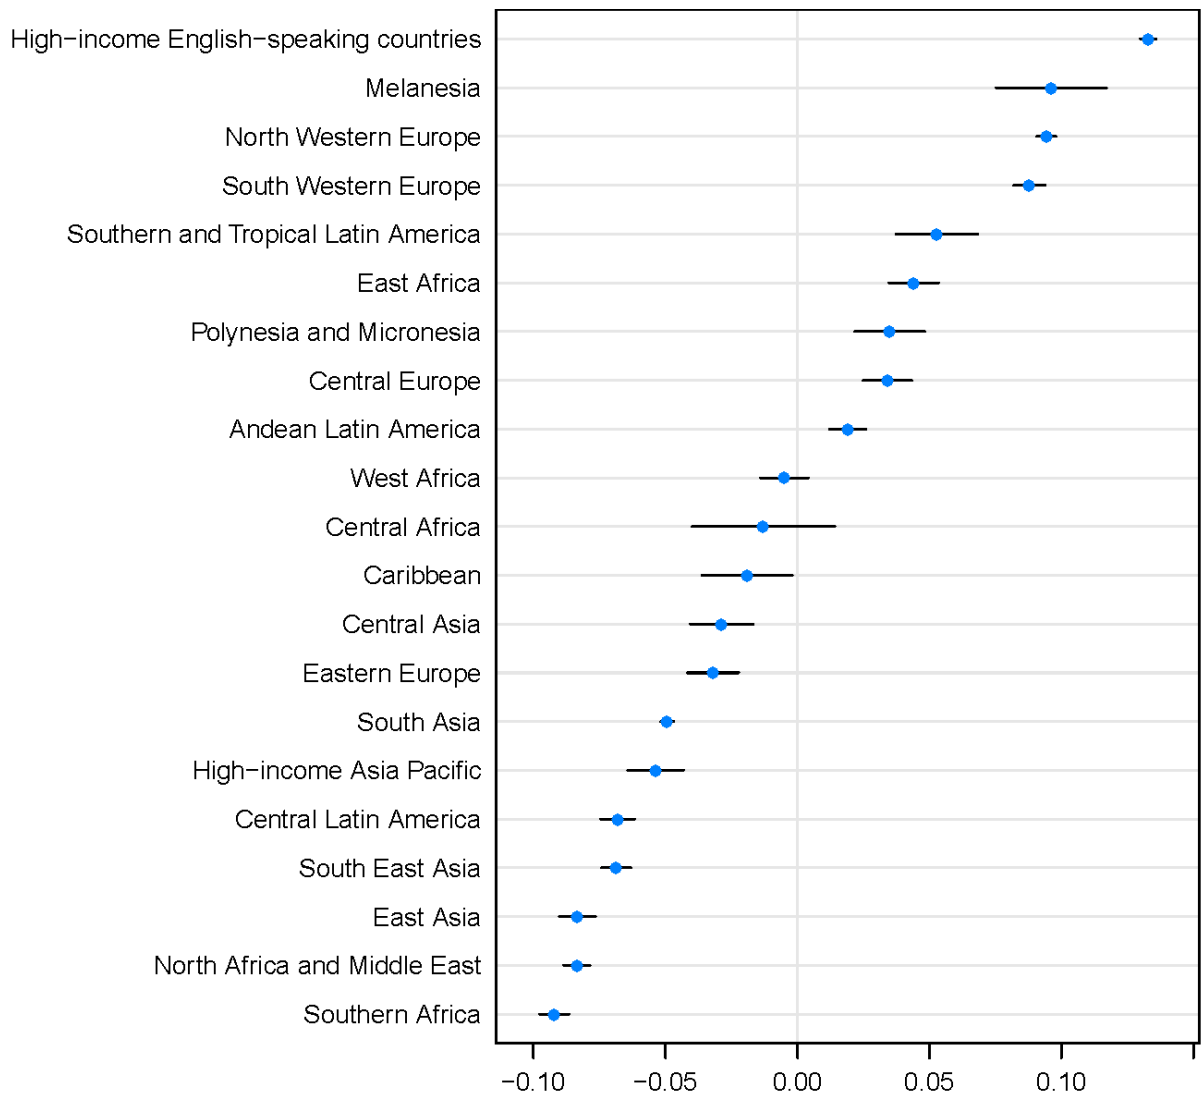



|                                                                                                                             |                              |
|-----------------------------------------------------------------------------------------------------------------------------|------------------------------|
| <b>Primary outcome: prevalence of raised blood pressure (SBP <math>\geq</math>140 mmHg or DBP <math>\geq</math>90 mmHg)</b> |                              |
| <b>Independent variable: prevalence (SBP <math>\geq</math>160 mmHg or DBP <math>\geq</math>95 mmHg)</b>                     |                              |
| <b>Variables</b>                                                                                                            | <b>Coefficients (95% CI)</b> |
| Intercept                                                                                                                   | -0.29 (-0.33, -0.26)         |
| Probit-transformed prevalence (SBP $\geq$ 160 mmHg or DBP $\geq$ 95 mmHg)                                                   | 0.96 (0.95, 0.96)            |
| Mean age of age group (centred at 50 years)                                                                                 | 0.0094 (0.0092, 0.0096)      |
| Male sex                                                                                                                    | -0.048 (-0.054, -0.043)      |
| Study mid-year (per one more recent year since 1975)                                                                        | 0.0020 (0.0018, 0.0022)      |
| Natural logarithm of per-capita gross domestic product                                                                      | 0.086 (0.083, 0.089)         |
| Probit-transformed prevalence * mean age of age group                                                                       | 0.0039 (0.0038, 0.0040)      |
| Probit-transformed prevalence * male sex                                                                                    | -0.081 (-0.085, -0.077)      |
| Random effects for regions                                                                                                  | Yes                          |
| <b>Number of data points used to fit the model = 7,363</b>                                                                  |                              |

Traditional  $R^2$  is not clearly defined for mixed-effect models. The pseudo- $R^2$  for the model, which describes the proportion of variance explained by both fixed and random factors,<sup>12</sup> was 0.955.

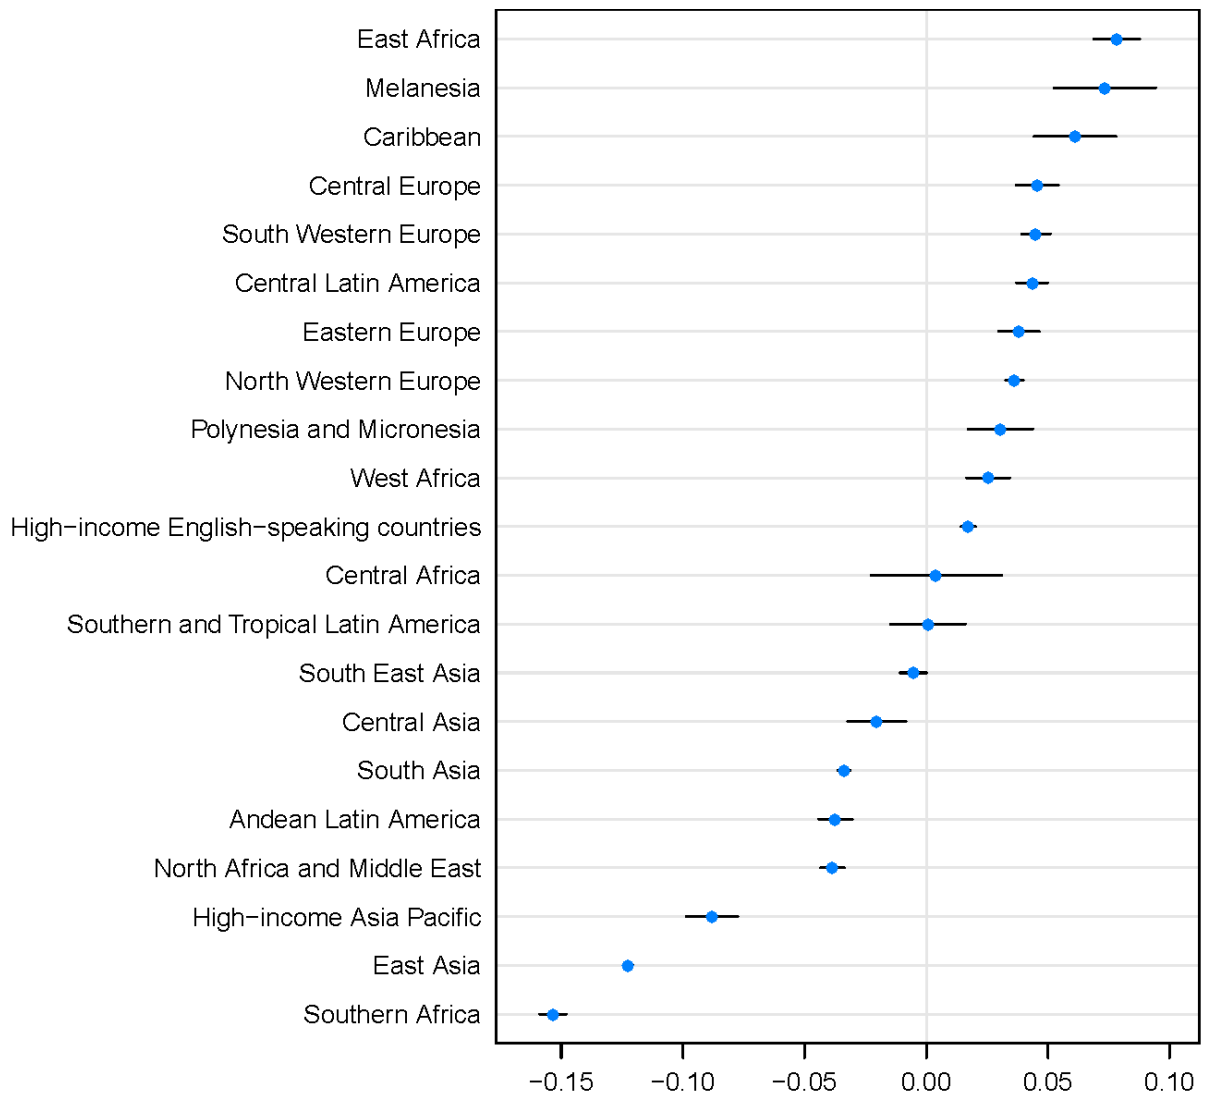

|                                                                                                                                               |                              |
|-----------------------------------------------------------------------------------------------------------------------------------------------|------------------------------|
| <b>Primary outcome: prevalence of raised blood pressure (SBP <math>\geq</math>140 mmHg or DBP <math>\geq</math>90 mmHg)</b>                   |                              |
| <b>Independent variable: prevalence (SBP <math>\geq</math>130 mmHg or DBP <math>\geq</math>85 mmHg or use of antihypertensive medication)</b> |                              |
| <b>Variables</b>                                                                                                                              | <b>Coefficients (95% CI)</b> |
| Intercept                                                                                                                                     | 0.033 (-0.017, 0.083)        |
| Probit-transformed prevalence (SBP $\geq$ 130 mmHg or DBP $\geq$ 85 mmHg or use of antihypertensive medication)                               | 0.85 (0.84, 0.85)            |
| Mean age of age group (centred at 50 years)                                                                                                   | 0.00065 (0.00042, 0.00087)   |
| Male sex                                                                                                                                      | -0.0071 (-0.011, -0.0033)    |
| Study mid-year (per one more recent year since 1975)                                                                                          | -0.0075 (-0.0078, -0.0073)   |
| Natural logarithm of per-capita gross domestic product                                                                                        | -0.043 (-0.047, -0.039)      |
| Probit-transformed prevalence * mean age of age group                                                                                         | -0.0020 (-0.0022, -0.0018)   |
| Probit-transformed prevalence * male sex                                                                                                      | 0.076 (0.070, 0.082)         |
| Random effects for regions                                                                                                                    | Yes                          |
| <b>Number of data points used to fit the model = 6,260</b>                                                                                    |                              |

Traditional  $R^2$  is not clearly defined for mixed-effect models. The pseudo- $R^2$  for the model, which describes the proportion of variance explained by both fixed and random factors,<sup>12</sup> was 0.867.

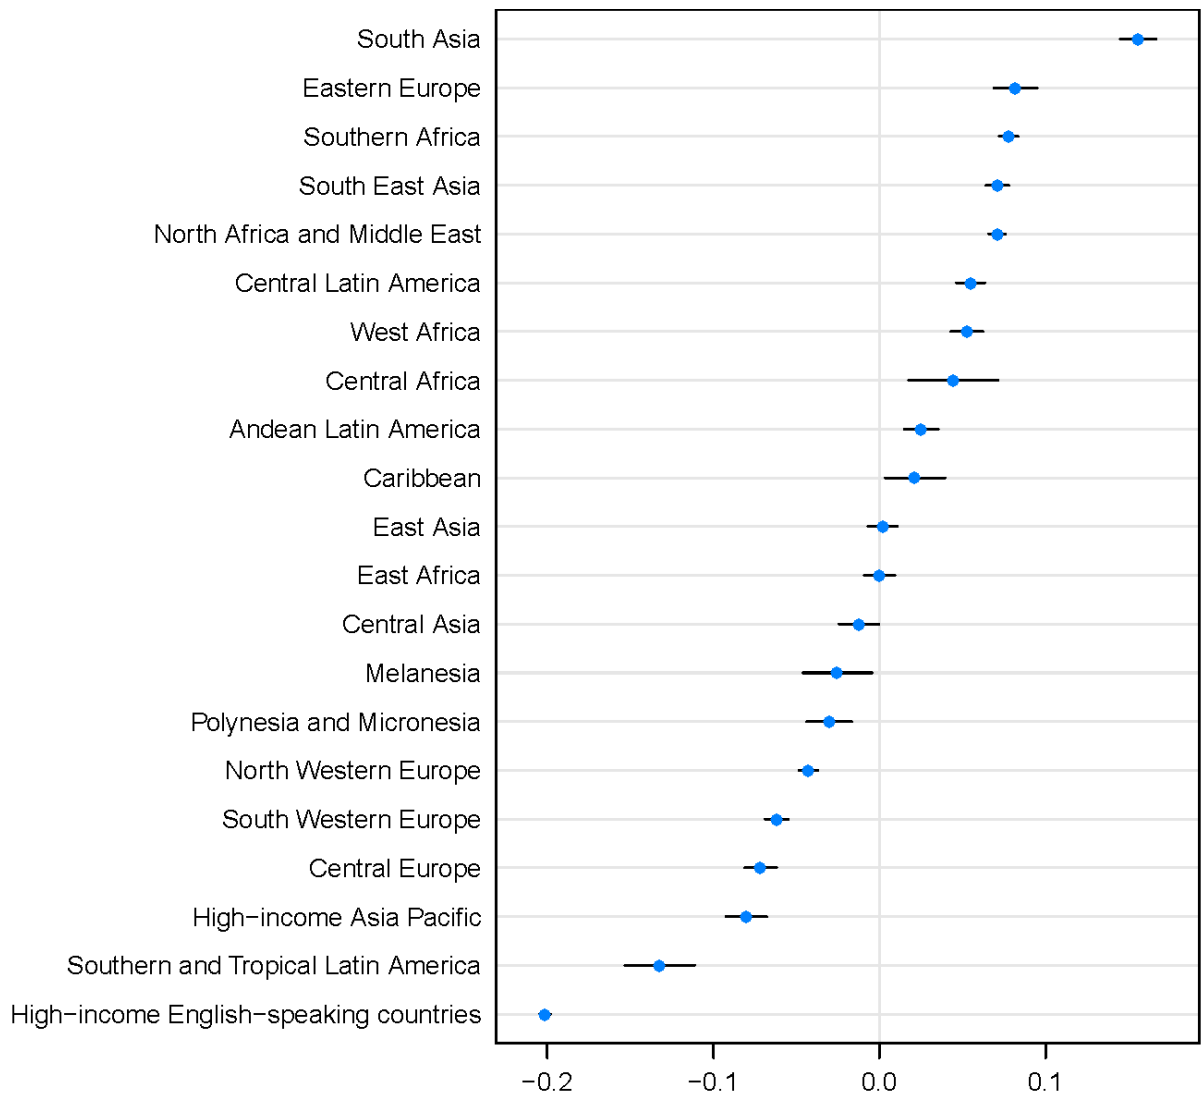

|                                                                                                                                                |                              |
|------------------------------------------------------------------------------------------------------------------------------------------------|------------------------------|
| <b>Primary outcome: prevalence of raised blood pressure (SBP <math>\geq</math>140 mmHg or DBP <math>\geq</math>90 mmHg)</b>                    |                              |
| <b>Independent variable: prevalence (SBP <math>\geq</math>160 mmHg or DBP <math>\geq</math>100 mmHg or use of antihypertensive medication)</b> |                              |
| <b>Variables</b>                                                                                                                               | <b>Coefficients (95% CI)</b> |
| Intercept                                                                                                                                      | 0.94 (0.88, 1.01)            |
| Probit-transformed prevalence (SBP $\geq$ 160 mmHg or DBP $\geq$ 100 mmHg or use of antihypertensive medication)                               | 0.52 (0.52, 0.53)            |
| Mean age of age group (centred at 50 years)                                                                                                    | 0.0073 (0.0070, 0.0075)      |
| Male sex                                                                                                                                       | 0.063 (0.058, 0.069)         |
| Study mid-year (per one more recent year since 1975)                                                                                           | -0.011 (-0.011, -0.011)      |
| Natural logarithm of per-capita gross domestic product                                                                                         | -0.077 (-0.081, -0.073)      |
| Probit-transformed prevalence * mean age of age group                                                                                          | -0.0034 (-0.0036, -0.0033)   |
| Probit-transformed prevalence * male sex                                                                                                       | -0.12 (-0.12, -0.11)         |
| Random effects for regions                                                                                                                     | Yes                          |
| <b>Number of data points used to fit the model = 5,997</b>                                                                                     |                              |

Traditional  $R^2$  is not clearly defined for mixed-effect models. The pseudo- $R^2$  for the model, which describes the proportion of variance explained by both fixed and random factors,<sup>12</sup> was 0.760.

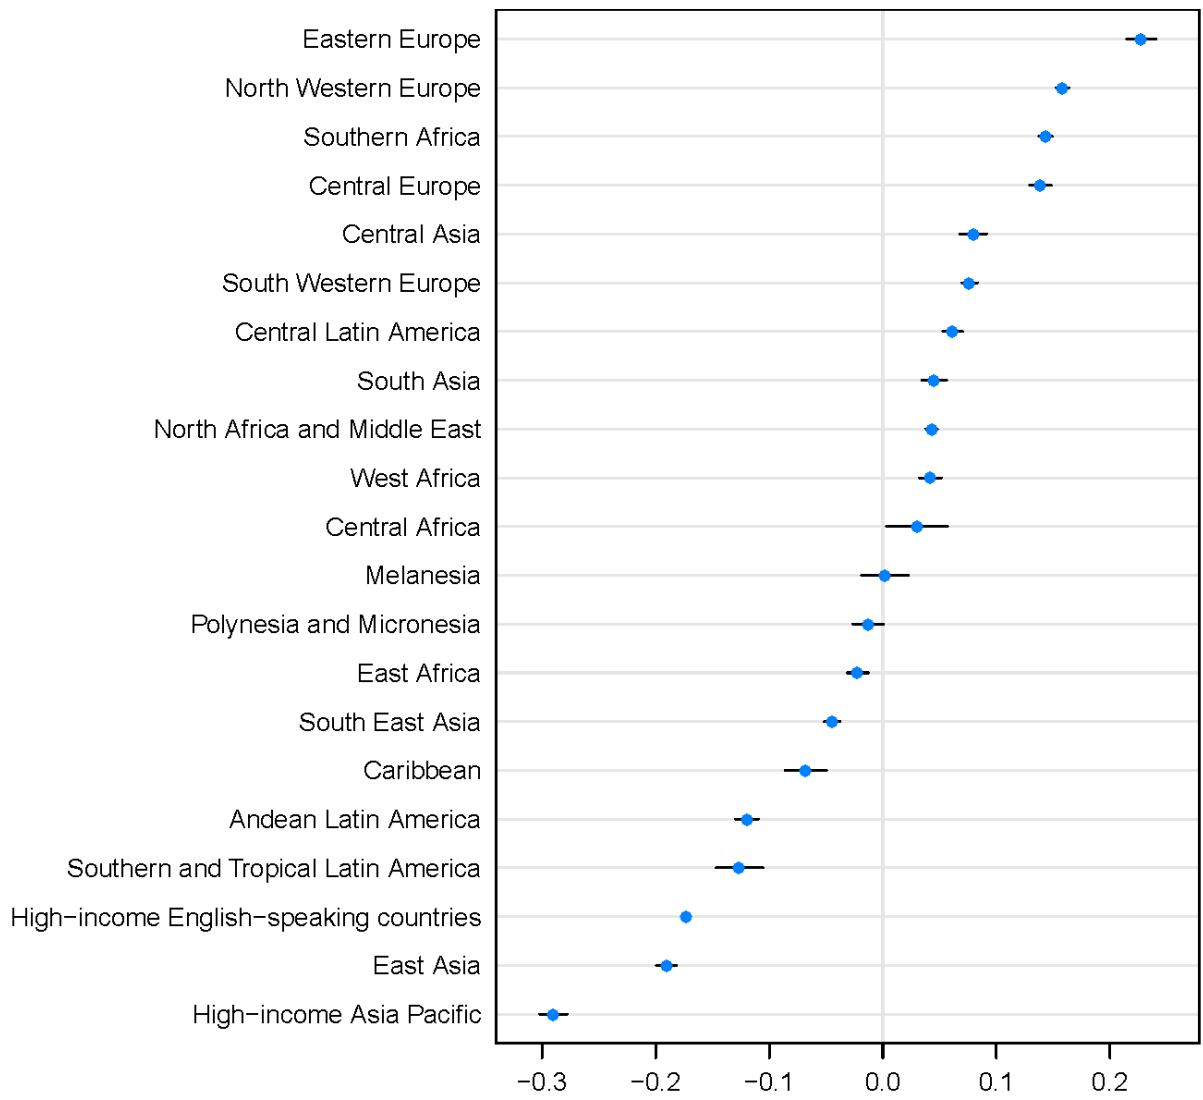

| <b>Primary outcome: prevalence of raised blood pressure (SBP <math>\geq</math>140 mmHg or DBP <math>\geq</math>90 mmHg)</b>                                            |                               |
|------------------------------------------------------------------------------------------------------------------------------------------------------------------------|-------------------------------|
| <b>Independent variables: mean SBP, mean DBP, and prevalence (SBP <math>\geq</math>140 mmHg or DBP <math>\geq</math>90 mmHg or use of antihypertensive medication)</b> |                               |
| <b>Variables</b>                                                                                                                                                       | <b>Coefficients (95% CI)</b>  |
| Intercept                                                                                                                                                              | -0.081 (-0.11, -0.052)        |
| Mean SBP (centred at 130 mmHg)                                                                                                                                         | 0.021 (0.021, 0.022)          |
| Mean DBP (centred at 80 mmHg)                                                                                                                                          | 0.014 (0.014, 0.015)          |
| Probit-transformed prevalence (SBP $\geq$ 140 mmHg or DBP $\geq$ 90 mmHg or use of antihypertensive medication)                                                        | 0.50 (0.49, 0.51)             |
| Mean age of age group (centred at 50 years)                                                                                                                            | -0.0051 (-0.0053, -0.0048)    |
| Male sex                                                                                                                                                               | 0.013 (0.0088, 0.017)         |
| Study mid-year (per one more recent year since 1975)                                                                                                                   | -0.0035 (-0.0037, -0.0033)    |
| Natural logarithm of per-capita gross domestic product                                                                                                                 | -0.014 (-0.017, -0.011)       |
| Mean SBP * mean age of age group                                                                                                                                       | 0.00056 (0.00054, 0.00058)    |
| Mean SBP * male sex                                                                                                                                                    | 0.0012 (0.00053, 0.0018)      |
| Mean DBP * mean age of age group                                                                                                                                       | -0.00019 (-0.00021, -0.00016) |
| Mean DBP * male sex                                                                                                                                                    | 0.0011 (0.00043, 0.0017)      |
| Probit-transformed prevalence * mean age of age group                                                                                                                  | -0.0095 (-0.0099, -0.0092)    |
| Probit-transformed prevalence * male sex                                                                                                                               | -0.00038 (-0.010, 0.0096)     |
| Random effects for regions                                                                                                                                             | Yes                           |
| <b>Number of data points used to fit the model = 8,639</b>                                                                                                             |                               |

Traditional  $R^2$  is not clearly defined for mixed-effect models. The pseudo- $R^2$  for the model, which describes the proportion of variance explained by both fixed and random factors,<sup>12</sup> was 0.935.

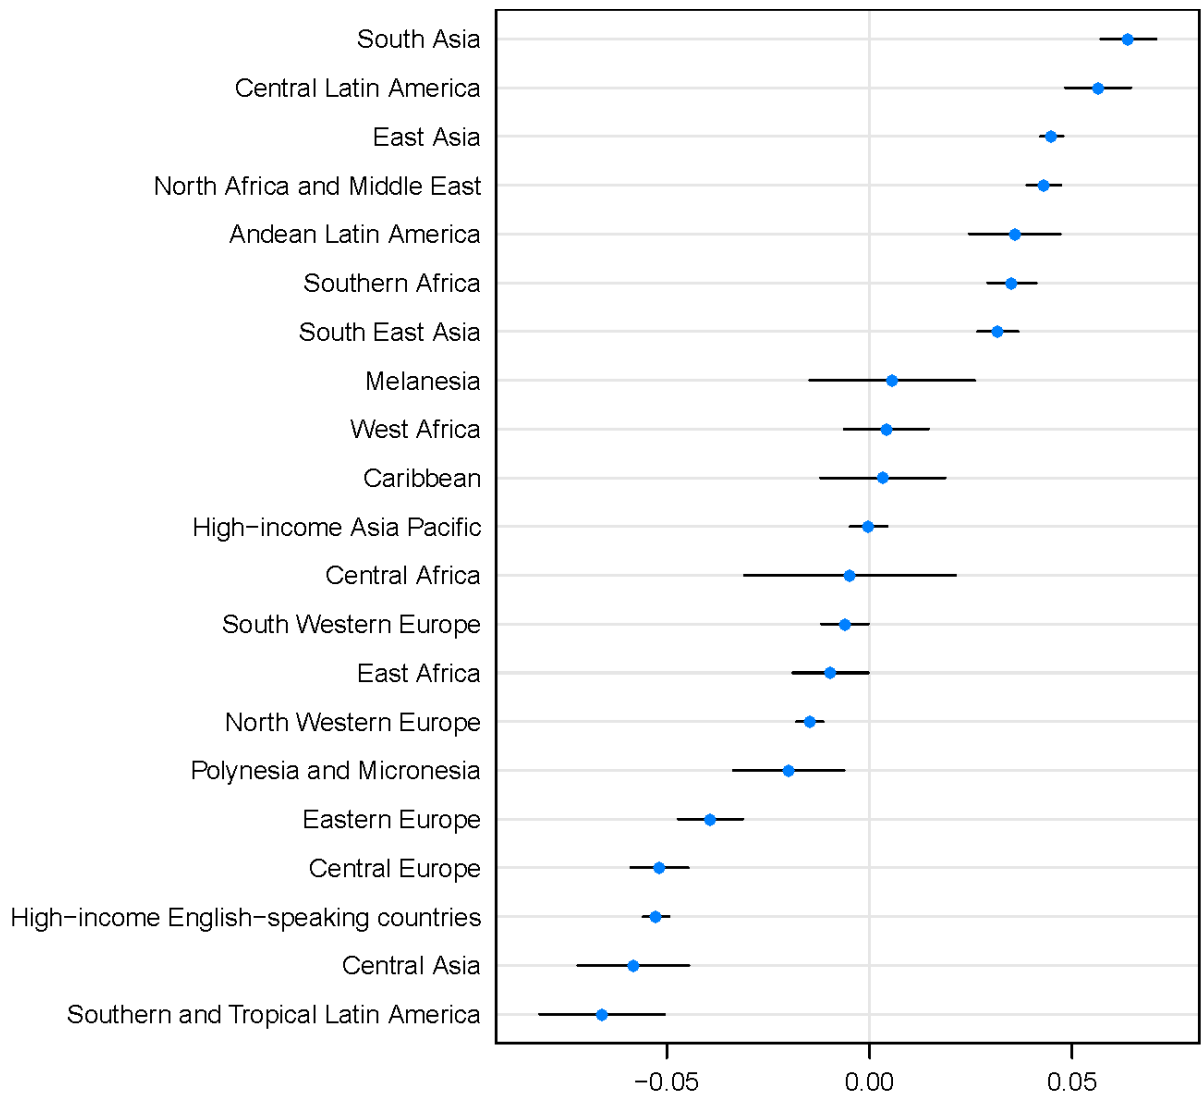



| <b>Primary outcome: prevalence of raised blood pressure (SBP <math>\geq</math>140 mmHg or DBP <math>\geq</math>90 mmHg)</b>                                            |                               |
|------------------------------------------------------------------------------------------------------------------------------------------------------------------------|-------------------------------|
| <b>Independent variables: mean SBP, mean DBP, and prevalence (SBP <math>\geq</math>160 mmHg or DBP <math>\geq</math>95 mmHg or use of antihypertensive medication)</b> |                               |
| <b>Variables</b>                                                                                                                                                       | <b>Coefficients (95% CI)</b>  |
| Intercept                                                                                                                                                              | -0.17 (-0.20, -0.14)          |
| Mean SBP (centred at 130 mmHg)                                                                                                                                         | 0.031 (0.031, 0.032)          |
| Mean DBP (centred at 80 mmHg)                                                                                                                                          | 0.025 (0.024, 0.025)          |
| Probit-transformed prevalence (SBP $\geq$ 160 mmHg or DBP $\geq$ 95 mmHg or use of antihypertensive medication)                                                        | 0.19 (0.18, 0.19)             |
| Mean age of age group (centred at 50 years)                                                                                                                            | -0.00090 (-0.0012, -0.00059)  |
| Male sex                                                                                                                                                               | -0.044 (-0.050, -0.037)       |
| Study mid-year (per one more recent year since 1975)                                                                                                                   | -0.0039 (-0.0041, -0.0037)    |
| Natural logarithm of per-capita gross domestic product                                                                                                                 | -0.0040 (-0.0068, -0.0012)    |
| Mean SBP * mean age of age group                                                                                                                                       | 0.00025 (0.00024, 0.00026)    |
| Mean SBP * male sex                                                                                                                                                    | 0.0047 (0.0042, 0.0052)       |
| Mean DBP * mean age of age group                                                                                                                                       | -0.00046 (-0.00048, -0.00044) |
| Mean DBP * male sex                                                                                                                                                    | 0.00044 (-0.00020, 0.0011)    |
| Probit-transformed prevalence * mean age of age group                                                                                                                  | -0.0041 (-0.0043, -0.0038)    |
| Probit-transformed prevalence * male sex                                                                                                                               | -0.066 (-0.074, -0.059)       |
| Random effects for regions                                                                                                                                             | Yes                           |
| <b>Number of data points used to fit the model = 8,679</b>                                                                                                             |                               |

Traditional  $R^2$  is not clearly defined for mixed-effect models. The pseudo- $R^2$  for the model, which describes the proportion of variance explained by both fixed and random factors,<sup>12</sup> was 0.922.

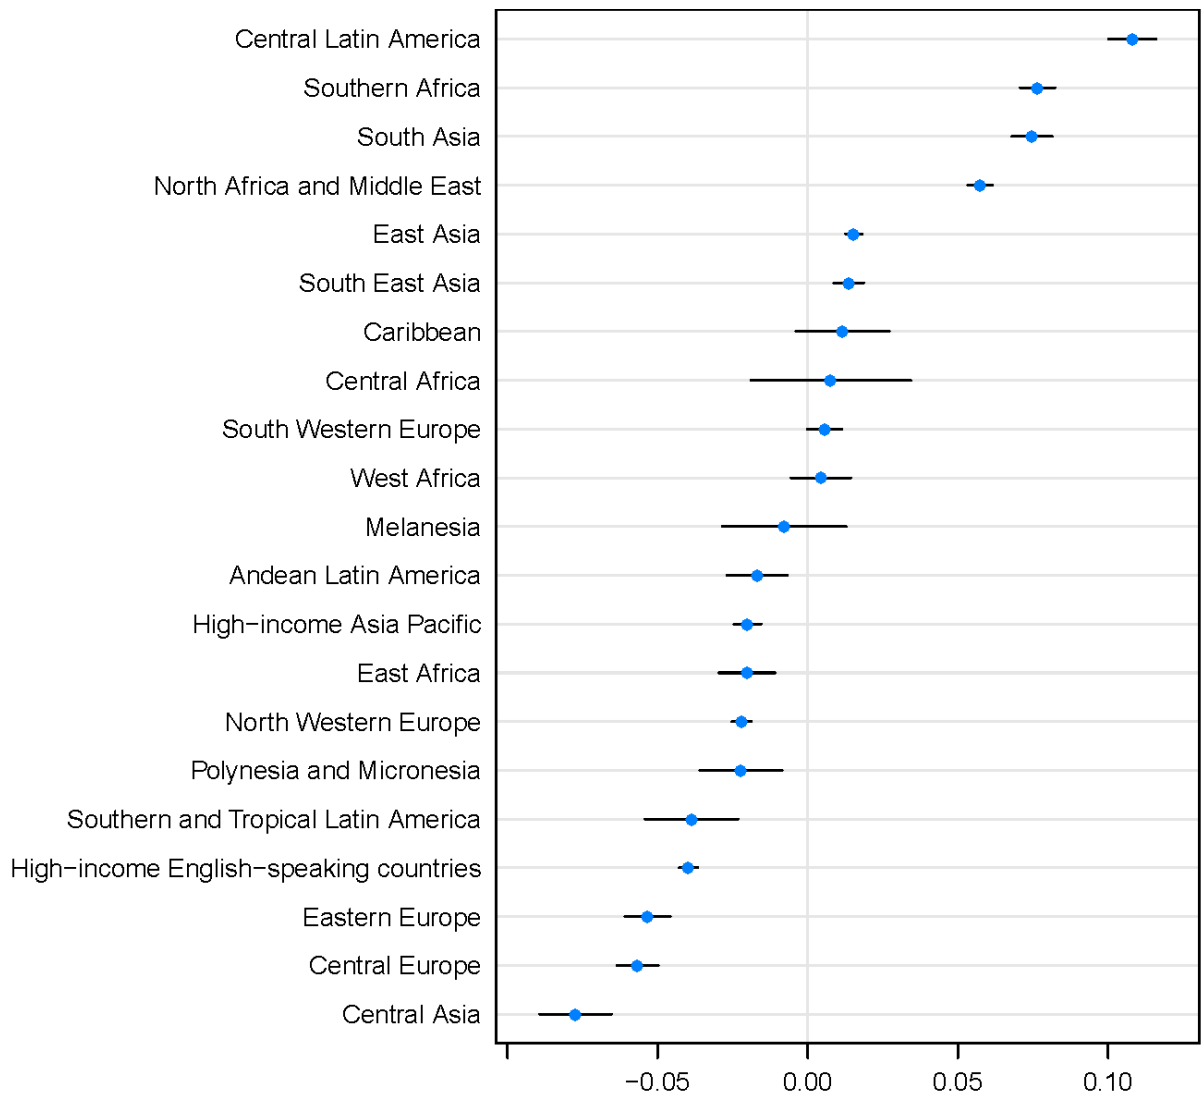

| <b>Primary outcome: prevalence of raised blood pressure (SBP <math>\geq</math>140 mmHg or DBP <math>\geq</math>90 mmHg)</b>      |                               |
|----------------------------------------------------------------------------------------------------------------------------------|-------------------------------|
| <b>Independent variables: mean SBP, mean DBP, and prevalence (SBP <math>\geq</math>160 mmHg or DBP <math>\geq</math>95 mmHg)</b> |                               |
| <b>Variables</b>                                                                                                                 | <b>Coefficients (95% CI)</b>  |
| Intercept                                                                                                                        | 0.16 (0.12, 0.20)             |
| Mean SBP (centred at 130 mmHg)                                                                                                   | 0.025 (0.024, 0.025)          |
| Mean DBP (centred at 80 mmHg)                                                                                                    | 0.0072 (0.0064, 0.0080)       |
| Probit-transformed prevalence (SBP $\geq$ 160 mmHg or DBP $\geq$ 95 mmHg)                                                        | 0.46 (0.45, 0.47)             |
| Mean age of age group (centred at 50 years)                                                                                      | -0.0025 (-0.0029, -0.0021)    |
| Male sex                                                                                                                         | -0.16 (-0.17, -0.14)          |
| Study mid-year (per one more recent year since 1975)                                                                             | -0.0025 (-0.0027, -0.0023)    |
| Natural logarithm of per-capita gross domestic product                                                                           | -0.0047 (-0.0083, -0.0011)    |
| Mean SBP * mean age of age group                                                                                                 | 0.00016 (0.00014, 0.00017)    |
| Mean SBP * male sex                                                                                                              | 0.0056 (0.0051, 0.0061)       |
| Mean DBP * mean age of age group                                                                                                 | -0.00014 (-0.00017, -0.00012) |
| Mean DBP * male sex                                                                                                              | 0.0058 (0.0049, 0.0067)       |
| Probit-transformed prevalence * mean age of age group                                                                            | -0.0046 (-0.0050, -0.0042)    |
| Probit-transformed prevalence * male sex                                                                                         | -0.16 (-0.17, -0.14)          |
| Random effects for regions                                                                                                       | Yes                           |
| <b>Number of data points used to fit the model = 7,329</b>                                                                       |                               |

Traditional  $R^2$  is not clearly defined for mixed-effect models. The pseudo- $R^2$  for the model, which describes the proportion of variance explained by both fixed and random factors,<sup>12</sup> was 0.929.

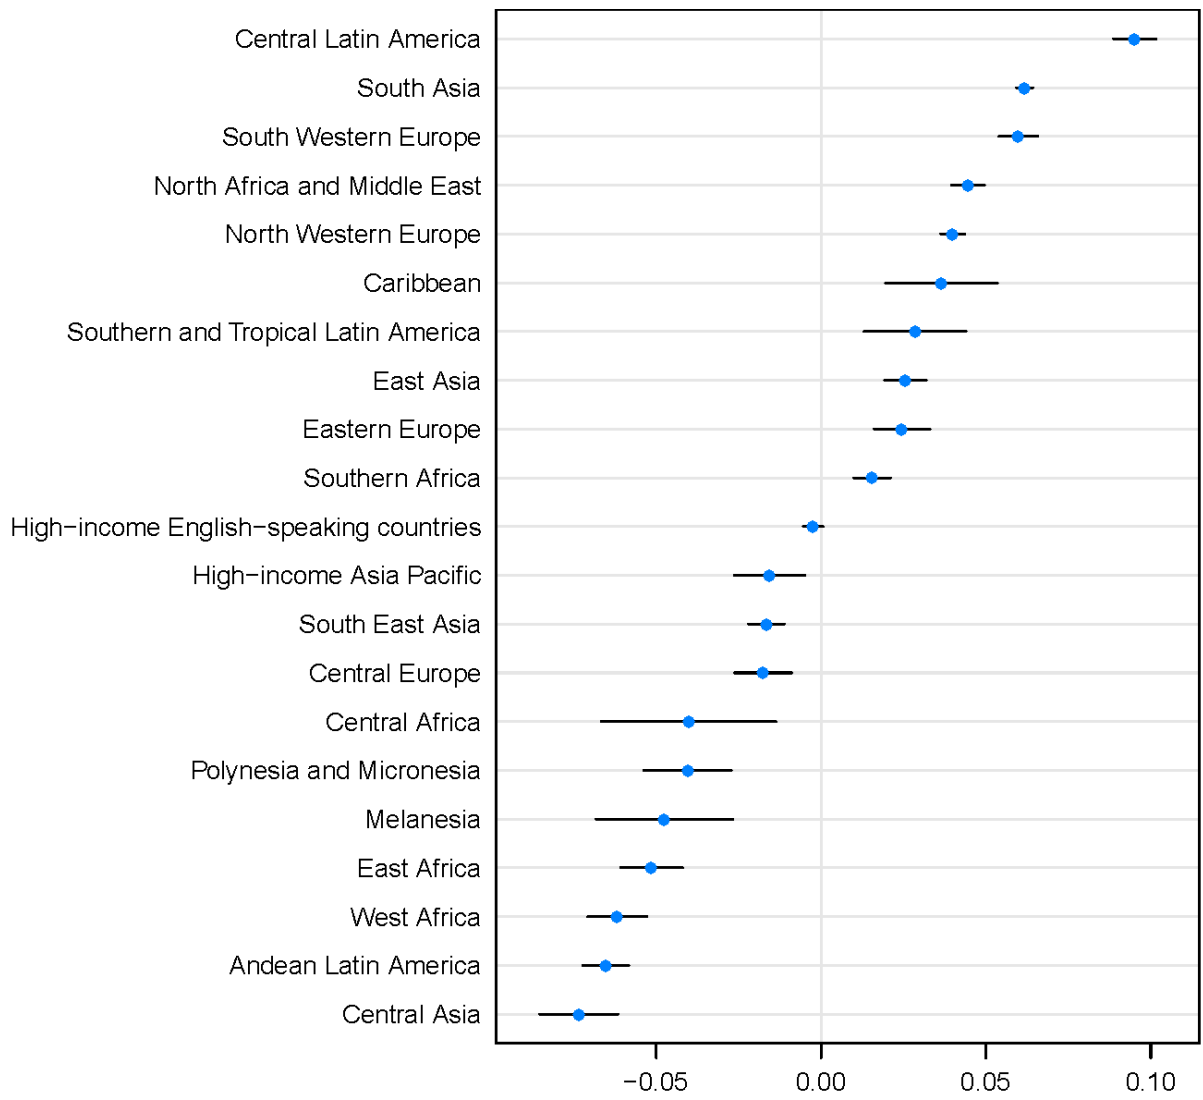

| <b>Primary outcome: prevalence of raised blood pressure (SBP <math>\geq</math>140 mmHg or DBP <math>\geq</math>90 mmHg)</b> |                               |
|-----------------------------------------------------------------------------------------------------------------------------|-------------------------------|
| <b>Independent variables: mean SBP, mean DBP, and prevalence (SBP <math>\geq</math>140 mmHg)</b>                            |                               |
| <b>Variables</b>                                                                                                            | <b>Coefficients (95% CI)</b>  |
| Intercept                                                                                                                   | 0.18 (0.16, 0.21)             |
| Mean SBP (centred at 130 mmHg)                                                                                              | -0.0081 (-0.0088, -0.0075)    |
| Mean DBP (centred at 80 mmHg)                                                                                               | 0.021 (0.020, 0.021)          |
| Probit-transformed prevalence (SBP $\geq$ 140 mmHg)                                                                         | 0.91 (0.90, 0.92)             |
| Mean age of age group (centred at 50 years)                                                                                 | -0.0012 (-0.0014, -0.00088)   |
| Male sex                                                                                                                    | 0.078 (0.069, 0.086)          |
| Study mid-year (per one more recent year since 1975)                                                                        | -0.0010 (-0.0012, -0.00092)   |
| Natural logarithm of per-capita gross domestic product                                                                      | -0.0038 (-0.0062, -0.0013)    |
| Mean SBP * mean age of age group                                                                                            | 0.00027 (0.00025, 0.00030)    |
| Mean SBP * male sex                                                                                                         | -0.0059 (-0.0067, -0.0050)    |
| Mean DBP * mean age of age group                                                                                            | -0.00017 (-0.00018, -0.00016) |
| Mean DBP * male sex                                                                                                         | -0.0025 (-0.0031, -0.0020)    |
| Probit-transformed prevalence * mean age of age group                                                                       | -4.6e-06 (-0.00038, 0.00037)  |
| Probit-transformed prevalence * male sex                                                                                    | 0.070 (0.057, 0.083)          |
| Random effects for regions                                                                                                  | Yes                           |
| <b>Number of data points used to fit the model = 10,453</b>                                                                 |                               |

Traditional  $R^2$  is not clearly defined for mixed-effect models. The pseudo- $R^2$  for the model, which describes the proportion of variance explained by both fixed and random factors,<sup>12</sup> was 0.956.

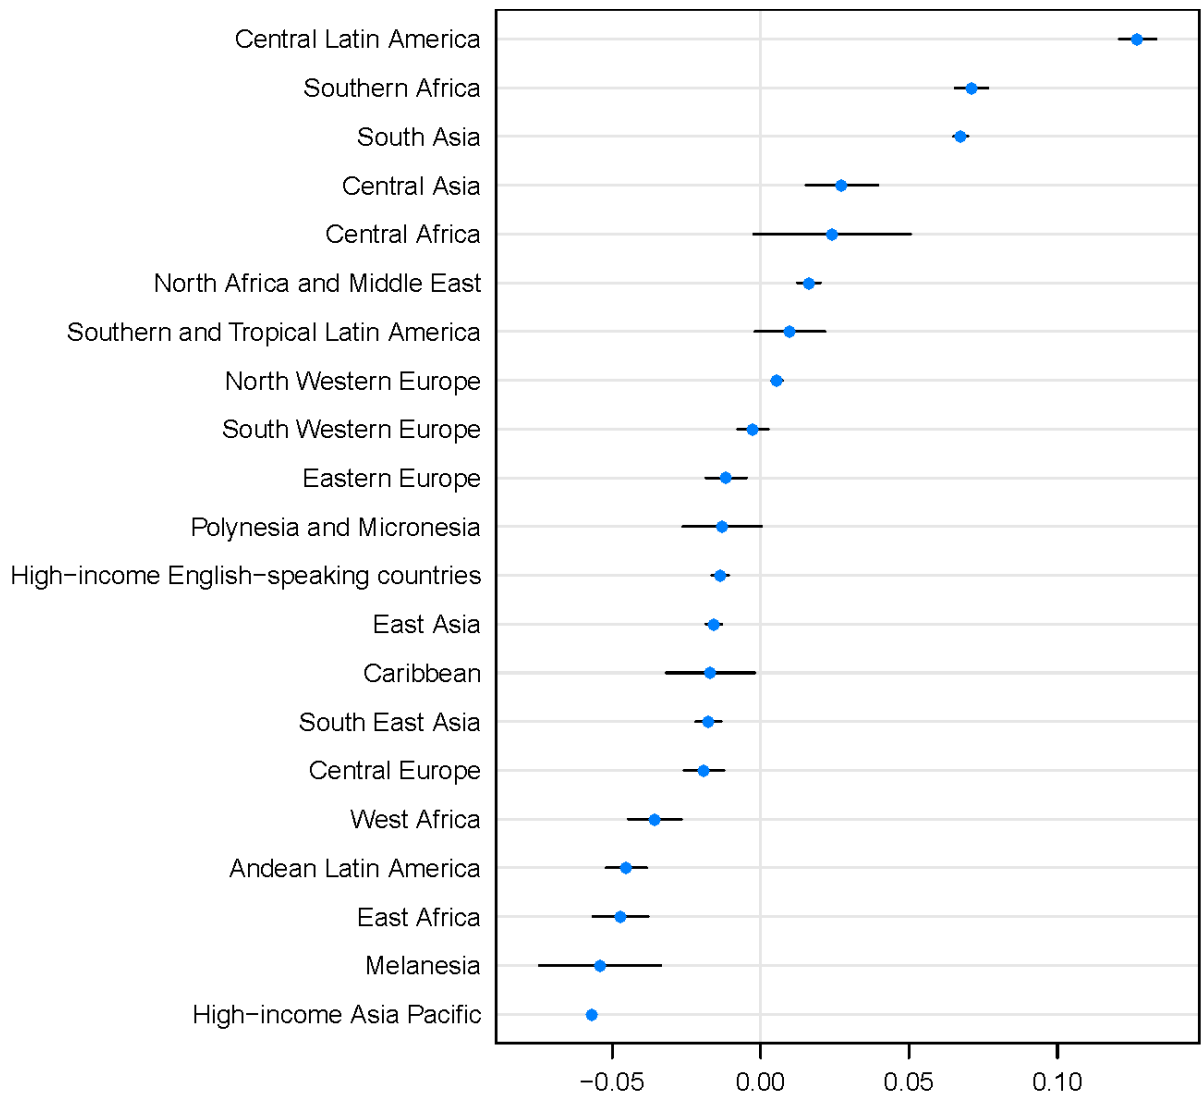

| <b>Primary outcome: prevalence of raised blood pressure (SBP <math>\geq</math>140 mmHg or DBP <math>\geq</math>90 mmHg)</b> |                               |
|-----------------------------------------------------------------------------------------------------------------------------|-------------------------------|
| <b>Independent variables: mean SBP, mean DBP, and prevalence (SBP <math>\geq</math>160 mmHg)</b>                            |                               |
| <b>Variables</b>                                                                                                            | <b>Coefficients (95% CI)</b>  |
| Intercept                                                                                                                   | 0.013 (-0.028, 0.054)         |
| Mean SBP (centred at 130 mmHg)                                                                                              | 0.020 (0.019, 0.021)          |
| Mean DBP (centred at 80 mmHg)                                                                                               | 0.027 (0.026, 0.027)          |
| Probit-transformed prevalence (SBP $\geq$ 160 mmHg)                                                                         | 0.35 (0.34, 0.36)             |
| Mean age of age group (centred at 50 years)                                                                                 | -0.00084 (-0.0015, -0.00016)  |
| Male sex                                                                                                                    | -0.13 (-0.15, -0.11)          |
| Study mid-year (per one more recent year since 1975)                                                                        | -0.0020 (-0.0022, -0.0017)    |
| Natural logarithm of per-capita gross domestic product                                                                      | 0.0090 (0.0054, 0.013)        |
| Mean SBP * mean age of age group                                                                                            | 0.00028 (0.00025, 0.00030)    |
| Mean SBP * male sex                                                                                                         | 0.0058 (0.0050, 0.0066)       |
| Mean DBP * mean age of age group                                                                                            | -0.00060 (-0.00062, -0.00058) |
| Mean DBP * male sex                                                                                                         | 0.0018 (0.0011, 0.0024)       |
| Probit-transformed prevalence * mean age of age group                                                                       | -0.0012 (-0.0017, -0.00075)   |
| Probit-transformed prevalence * male sex                                                                                    | -0.10 (-0.12, -0.091)         |
| Random effects for regions                                                                                                  | Yes                           |
| <b>Number of data points used to fit the model = 6,417</b>                                                                  |                               |

Traditional  $R^2$  is not clearly defined for mixed-effect models. The pseudo- $R^2$  for the model, which describes the proportion of variance explained by both fixed and random factors,<sup>12</sup> was 0.922.

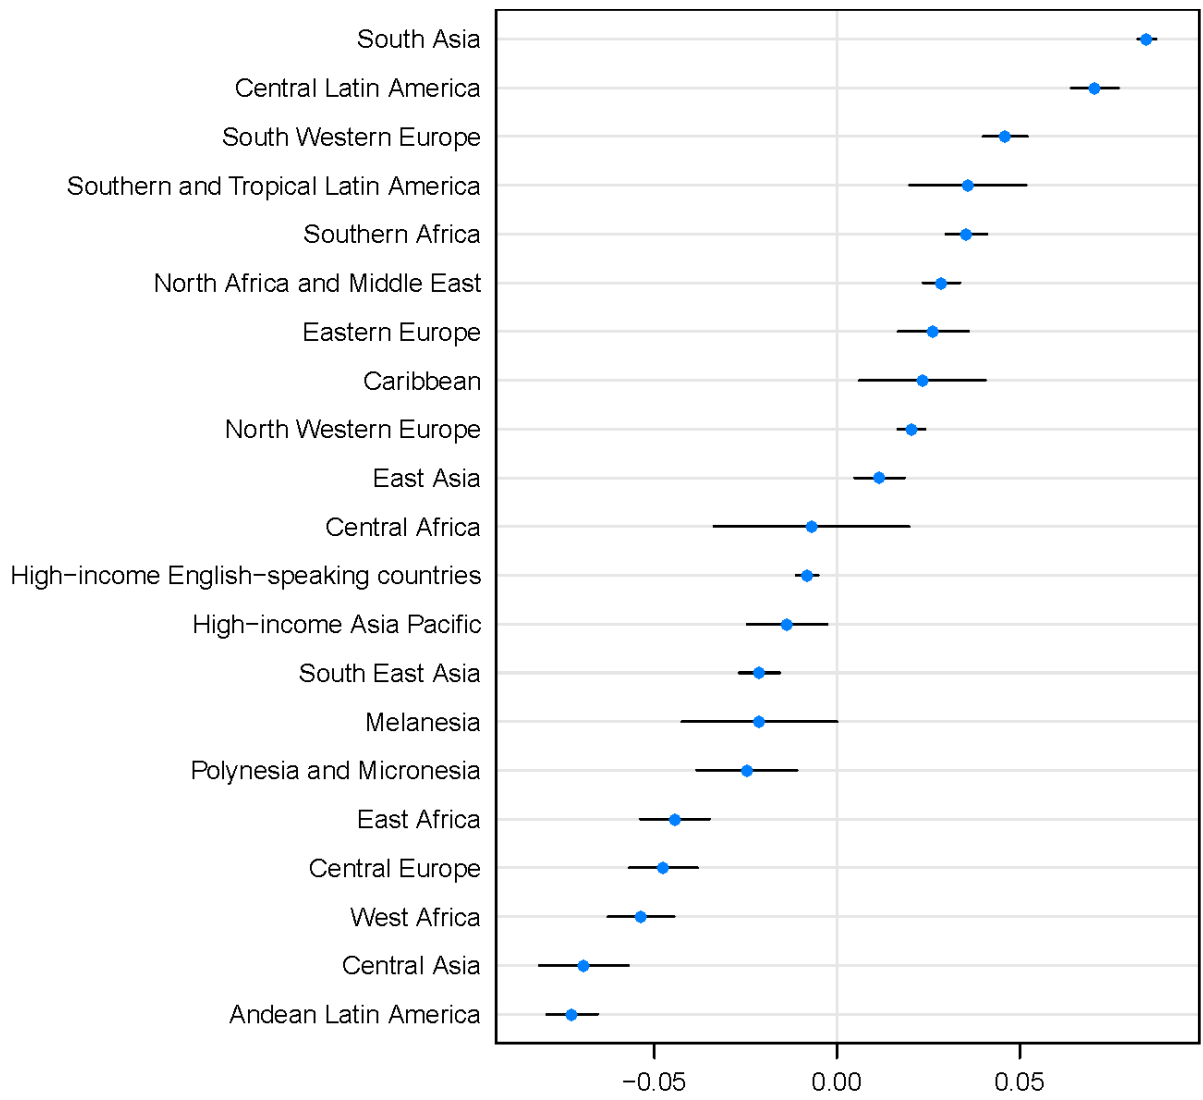



| <b>Primary outcome: prevalence of raised blood pressure (SBP <math>\geq</math>140 mmHg or DBP <math>\geq</math>90 mmHg)</b>      |                              |
|----------------------------------------------------------------------------------------------------------------------------------|------------------------------|
| <b>Independent variables: mean SBP, mean DBP, and prevalence (SBP <math>\geq</math>135 mmHg or DBP <math>\geq</math>85 mmHg)</b> |                              |
| <b>Variables</b>                                                                                                                 | <b>Coefficients (95% CI)</b> |
| Intercept                                                                                                                        | -0.10 (-0.14, -0.065)        |
| Mean SBP (centred at 130 mmHg)                                                                                                   | 0.0042 (0.0034, 0.0049)      |
| Mean DBP (centred at 80 mmHg)                                                                                                    | 0.00097 (0.00015, 0.0018)    |
| Probit-transformed prevalence (SBP $\geq$ 135 mmHg or DBP $\geq$ 85 mmHg)                                                        | 0.85 (0.83, 0.87)            |
| Mean age of age group (centred at 50 years)                                                                                      | 0.0036 (0.0035, 0.0038)      |
| Male sex                                                                                                                         | -0.018 (-0.022, -0.015)      |
| Study mid-year (per one more recent year since 1975)                                                                             | -0.0035 (-0.0037, -0.0033)   |
| Natural logarithm of per-capita gross domestic product                                                                           | -0.013 (-0.017, -0.0098)     |
| Mean SBP * mean age of age group                                                                                                 | 0.00018 (0.00015, 0.00021)   |
| Mean SBP * male sex                                                                                                              | 9.5e-05 (-0.00078, 0.00097)  |
| Mean DBP * mean age of age group                                                                                                 | 7.5e-05 (4.9e-05, 0.00010)   |
| Mean DBP * male sex                                                                                                              | 0.00058 (-0.00034, 0.0015)   |
| Probit-transformed prevalence * mean age of age group                                                                            | -0.0039 (-0.0045, -0.0033)   |
| Probit-transformed prevalence * male sex                                                                                         | -0.0083 (-0.029, 0.012)      |
| Random effects for regions                                                                                                       | Yes                          |
| <b>Number of data points used to fit the model = 7,466</b>                                                                       |                              |

Traditional  $R^2$  is not clearly defined for mixed-effect models. The pseudo- $R^2$  for the model, which describes the proportion of variance explained by both fixed and random factors,<sup>12</sup> was 0.935.

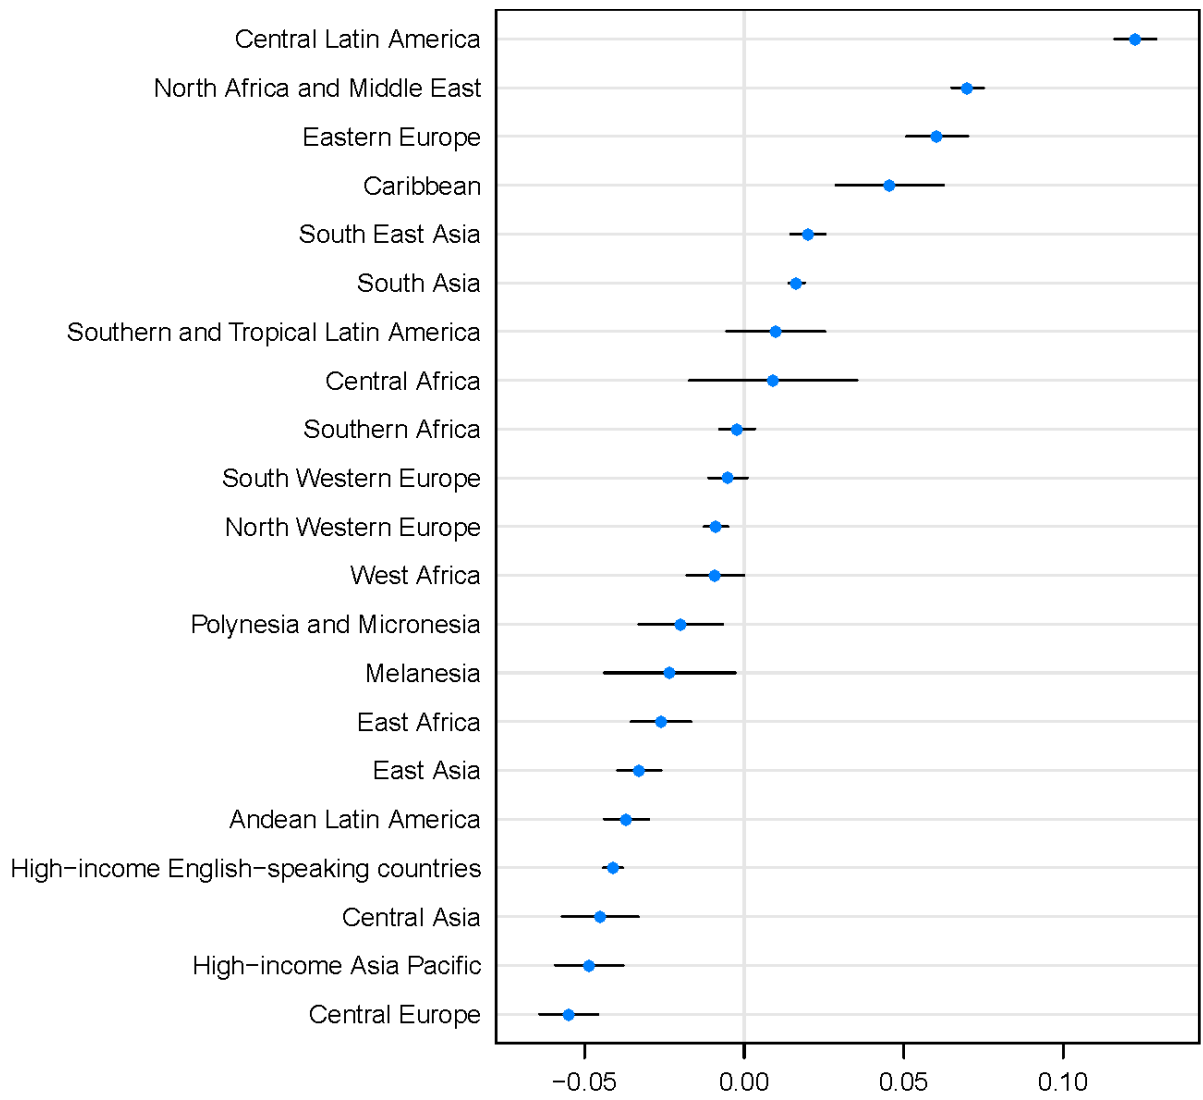

| <b>Primary outcome: prevalence of raised blood pressure (SBP <math>\geq</math>140 mmHg or DBP <math>\geq</math>90 mmHg)</b>        |                              |
|------------------------------------------------------------------------------------------------------------------------------------|------------------------------|
| <b>Independent variables: mean SBP, prevalence (SBP <math>\geq</math>140 mmHg), and prevalence (SBP <math>\geq</math>160 mmHg)</b> |                              |
| <b>Variables</b>                                                                                                                   | <b>Coefficients (95% CI)</b> |
| Intercept                                                                                                                          | 0.14 (0.094, 0.19)           |
| Mean SBP (centred at 130 mmHg)                                                                                                     | 0.0014 (0.00041, 0.0023)     |
| Probit-transformed prevalence (SBP $\geq$ 140 mmHg)                                                                                | 0.85 (0.83, 0.87)            |
| Probit-transformed prevalence (SBP $\geq$ 160 mmHg)                                                                                | 0.013 (-0.0022, 0.028)       |
| Mean age of age group (centred at 50 years)                                                                                        | -0.012 (-0.013, -0.011)      |
| Male sex                                                                                                                           | 0.084 (0.064, 0.10)          |
| Study mid-year (per one more recent year since 1975)                                                                               | -0.0024 (-0.0027, -0.0022)   |
| Natural logarithm of per-capita gross domestic product                                                                             | 0.0055 (0.0018, 0.0092)      |
| Mean SBP * mean age of age group                                                                                                   | 0.00039 (0.00035, 0.00043)   |
| Mean SBP * male sex                                                                                                                | -0.0047 (-0.0060, -0.0035)   |
| Probit-transformed prevalence (SBP $\geq$ 140 mmHg) * mean age of age group                                                        | 0.0019 (0.0011, 0.0026)      |
| Probit-transformed prevalence (SBP $\geq$ 140 mmHg) * male sex                                                                     | 0.051 (0.025, 0.078)         |
| Probit-transformed prevalence (SBP $\geq$ 160 mmHg) * mean age of age group                                                        | -0.0072 (-0.0077, -0.0066)   |
| Probit-transformed prevalence (SBP $\geq$ 160 mmHg) * male sex                                                                     | 0.0024 (-0.015, 0.020)       |
| Random effects for regions                                                                                                         | Yes                          |
| <b>Number of data points used to fit the model = 6,376</b>                                                                         |                              |

Traditional  $R^2$  is not clearly defined for mixed-effect models. The pseudo- $R^2$  for the model, which describes the proportion of variance explained by both fixed and random factors,<sup>12</sup> was 0.924.

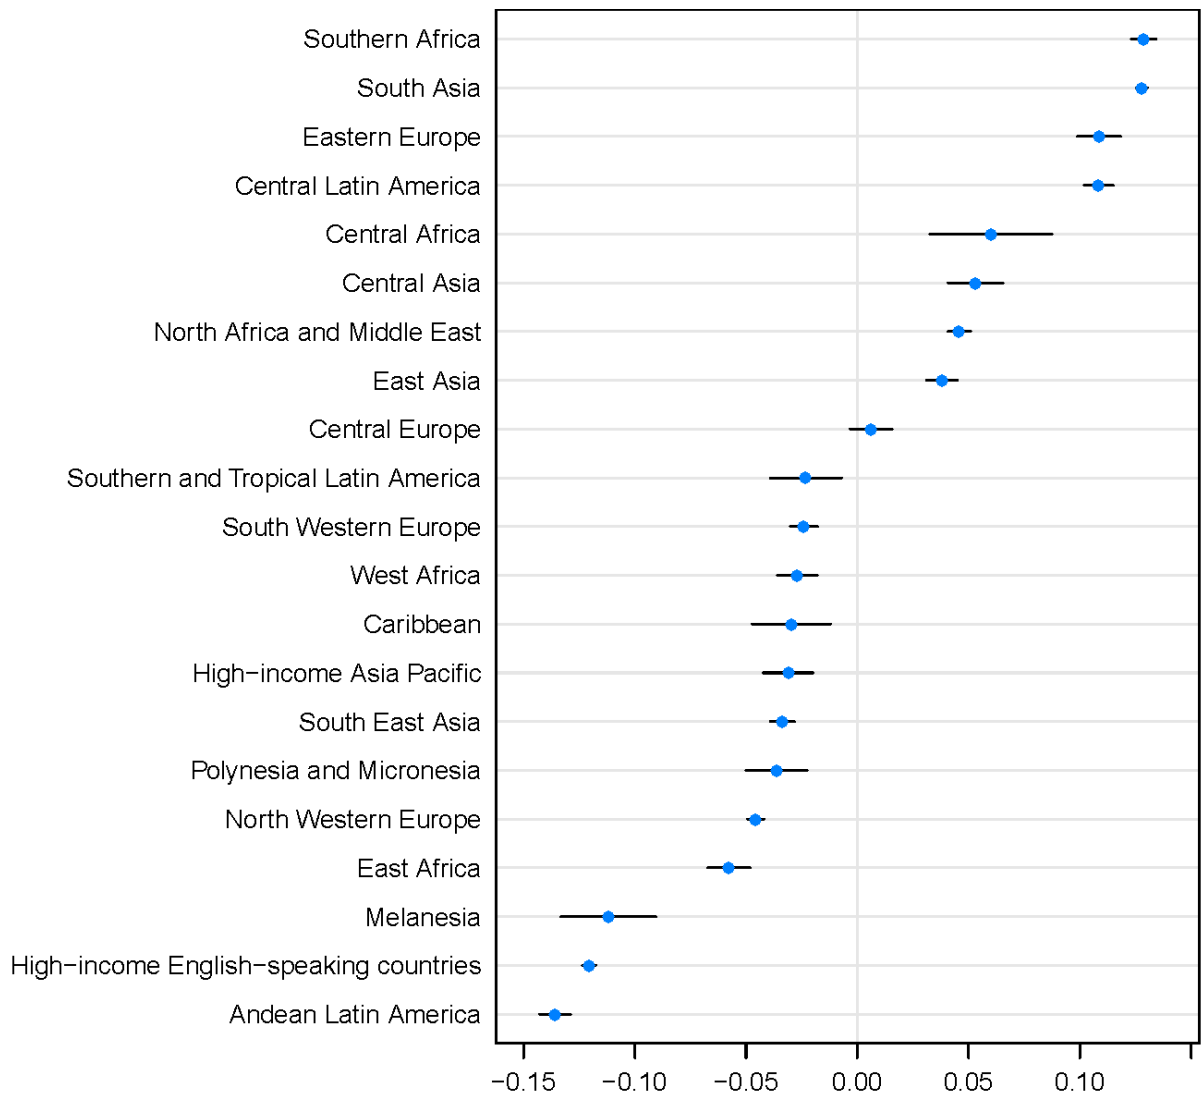

| <b>Primary outcome: prevalence of raised blood pressure (SBP <math>\geq</math>140 mmHg or DBP <math>\geq</math>90 mmHg)</b> |                               |
|-----------------------------------------------------------------------------------------------------------------------------|-------------------------------|
| <b>Independent variables: mean SBP and prevalence (SBP <math>\geq</math>140 mmHg)</b>                                       |                               |
| <b>Variables</b>                                                                                                            | <b>Coefficients (95% CI)</b>  |
| Intercept                                                                                                                   | -0.035 (-0.079, 0.0089)       |
| Mean SBP (centred at 130 mmHg)                                                                                              | -0.0020 (-0.0026, -0.0013)    |
| Probit-transformed prevalence (SBP $\geq$ 140 mmHg)                                                                         | 0.87 (0.86, 0.88)             |
| Mean age of age group (centred at 50 years)                                                                                 | -0.0053 (-0.0056, -0.0051)    |
| Male sex                                                                                                                    | 0.11 (0.10, 0.12)             |
| Study mid-year (per one more recent year since 1975)                                                                        | -0.00083 (-0.00096, -0.00069) |
| Natural logarithm of per-capita gross domestic product                                                                      | 0.017 (0.014, 0.019)          |
| Mean SBP * mean age of age group                                                                                            | 0.00072 (0.00070, 0.00074)    |
| Probit-transformed prevalence (SBP $\geq$ 140 mmHg) * mean age of age group                                                 | -0.0098 (-0.010, -0.0094)     |
| Mean SBP * male sex                                                                                                         | -0.0073 (-0.0081, -0.0065)    |
| Probit-transformed prevalence (SBP $\geq$ 140 mmHg) * male sex                                                              | 0.086 (0.074, 0.098)          |
| Random effects for regions                                                                                                  | Yes                           |
| <b>Number of data points used to fit the model = 10,454</b>                                                                 |                               |

Traditional  $R^2$  is not clearly defined for mixed-effect models. The pseudo- $R^2$  for the model, which describes the proportion of variance explained by both fixed and random factors,<sup>12</sup> was 0.940.

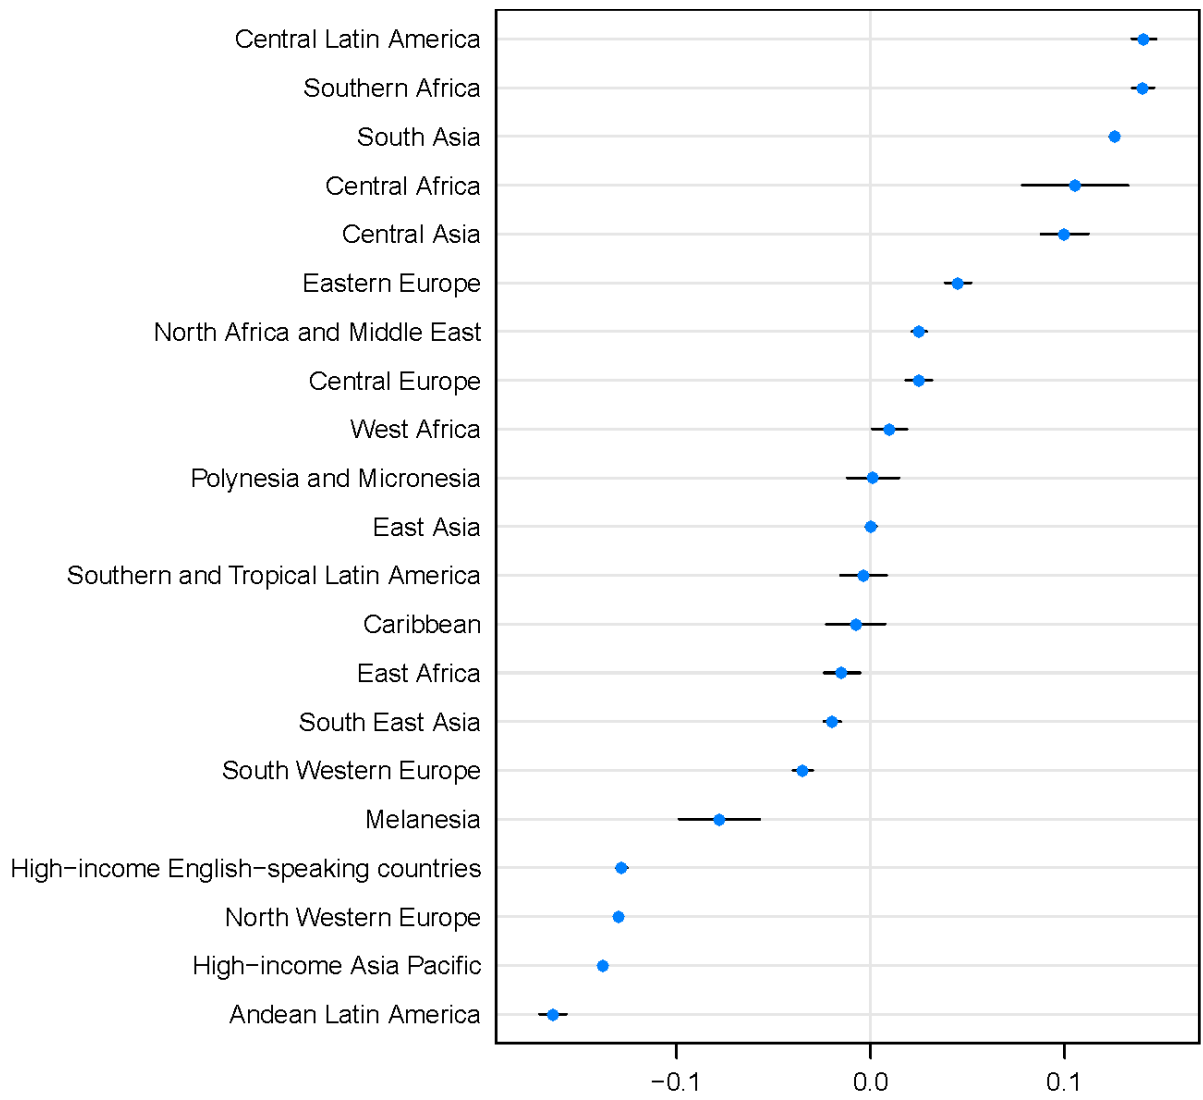

| <b>Primary outcome: prevalence of raised blood pressure (SBP <math>\geq</math>140 mmHg or DBP <math>\geq</math>90 mmHg)</b>                                 |                              |
|-------------------------------------------------------------------------------------------------------------------------------------------------------------|------------------------------|
| <b>Independent variables: mean SBP and prevalence (SBP <math>\geq</math>140 mmHg or DBP <math>\geq</math>90 mmHg or use of antihypertensive medication)</b> |                              |
| <b>Variables</b>                                                                                                                                            | <b>Coefficients (95% CI)</b> |
| Intercept                                                                                                                                                   | -0.070 (-0.10, -0.038)       |
| Mean SBP (centred at 130 mmHg)                                                                                                                              | 0.024 (0.023, 0.024)         |
| Probit-transformed prevalence (SBP $\geq$ 140 mmHg or DBP $\geq$ 90 mmHg or use of antihypertensive medication)                                             | 0.58 (0.57, 0.59)            |
| Mean age of age group (centred at 50 years)                                                                                                                 | -0.0086 (-0.0088, -0.0084)   |
| Male sex                                                                                                                                                    | 0.035 (0.031, 0.039)         |
| Study mid-year (per one more recent year since 1975)                                                                                                        | -0.0039 (-0.0041, -0.0037)   |
| Natural logarithm of per-capita gross domestic product                                                                                                      | -0.010 (-0.013, -0.0072)     |
| Mean SBP * mean age of age group                                                                                                                            | 0.00064 (0.00062, 0.00066)   |
| Probit-transformed prevalence * mean age of age group                                                                                                       | -0.014 (-0.014, -0.013)      |
| Mean SBP * male sex                                                                                                                                         | 0.00023 (-0.00039, 0.00084)  |
| Probit-transformed prevalence * male sex                                                                                                                    | 0.031 (0.021, 0.041)         |
| Random effects for regions                                                                                                                                  | Yes                          |
| <b>Number of data points used to fit the model = 8,640</b>                                                                                                  |                              |

Traditional  $R^2$  is not clearly defined for mixed-effect models. The pseudo- $R^2$  for the model, which describes the proportion of variance explained by both fixed and random factors,<sup>12</sup> was 0.932.

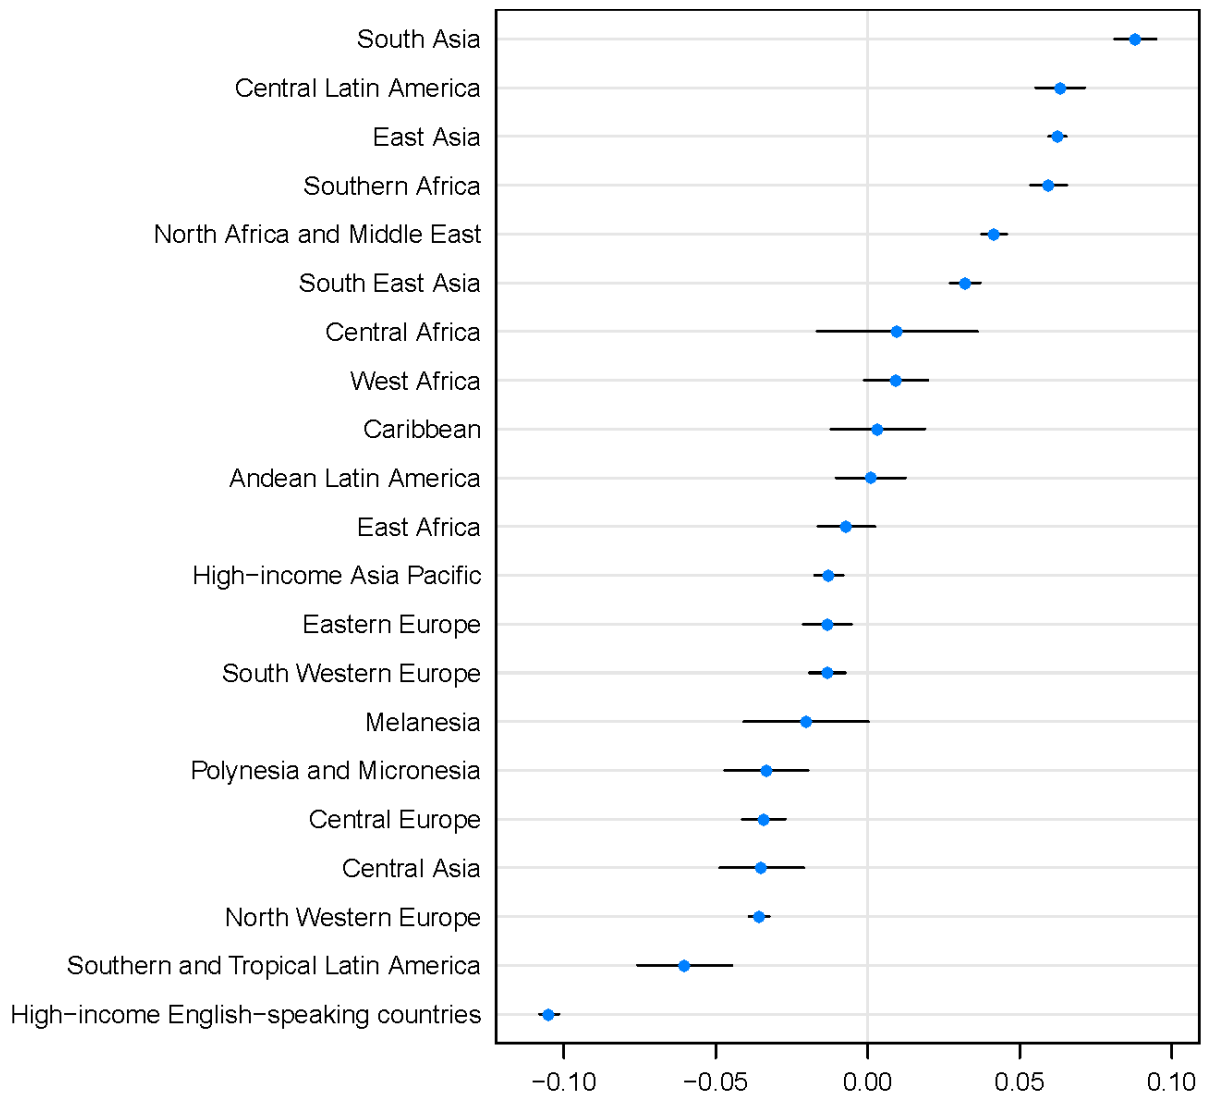



| <b>Primary outcome: prevalence of raised blood pressure (SBP <math>\geq</math>140 mmHg or DBP <math>\geq</math>90 mmHg)</b>                                                                                                                                         |                              |
|---------------------------------------------------------------------------------------------------------------------------------------------------------------------------------------------------------------------------------------------------------------------|------------------------------|
| <b>Independent variables: prevalence (SBP <math>\geq</math>140 mmHg or DBP <math>\geq</math>90 mmHg or use of antihypertensive medication) and prevalence (SBP <math>\geq</math>160 mmHg or DBP <math>\geq</math>95 mmHg or use of antihypertensive medication)</b> |                              |
| <b>Variables</b>                                                                                                                                                                                                                                                    | <b>Coefficients (95% CI)</b> |
| Intercept                                                                                                                                                                                                                                                           | -0.12 (-0.16, -0.083)        |
| Probit-transformed prevalence (SBP $\geq$ 140 mmHg or DBP $\geq$ 90 mmHg or use of antihypertensive medication)                                                                                                                                                     | 1.18 (1.16, 1.19)            |
| Probit-transformed prevalence (SBP $\geq$ 160 mmHg or DBP $\geq$ 95 mmHg or use of antihypertensive medication)                                                                                                                                                     | -0.21 (-0.22, -0.20)         |
| Mean age of age group (centred at 50 years)                                                                                                                                                                                                                         | -0.013 (-0.013, -0.013)      |
| Male sex                                                                                                                                                                                                                                                            | -0.063 (-0.071, -0.055)      |
| Study mid-year (per one more recent year since 1975)                                                                                                                                                                                                                | -0.0045 (-0.0047, -0.0043)   |
| Natural logarithm of per-capita gross domestic product                                                                                                                                                                                                              | -0.0027 (-0.0055, 0.00019)   |
| Probit-transformed prevalence (SBP $\geq$ 140 mmHg or DBP $\geq$ 90 mmHg or use of antihypertensive medication) * mean age of age group                                                                                                                             | 0.011 (0.011, 0.012)         |
| Probit-transformed prevalence (SBP $\geq$ 160 mmHg or DBP $\geq$ 95 mmHg or use of antihypertensive medication) * mean age of age group                                                                                                                             | -0.014 (-0.014, -0.013)      |
| Probit-transformed prevalence (SBP $\geq$ 140 mmHg or DBP $\geq$ 90 mmHg or use of antihypertensive medication) * male sex                                                                                                                                          | 0.21 (0.19, 0.22)            |
| Probit-transformed prevalence (SBP $\geq$ 160 mmHg or DBP $\geq$ 95 mmHg or use of antihypertensive medication) * male sex                                                                                                                                          | -0.19 (-0.21, -0.18)         |
| Random effects for regions                                                                                                                                                                                                                                          | Yes                          |
| <b>Number of data points used to fit the model = 8,432</b>                                                                                                                                                                                                          |                              |

Traditional  $R^2$  is not clearly defined for mixed-effect models. The pseudo- $R^2$  for the model, which describes the proportion of variance explained by both fixed and random factors,<sup>12</sup> was 0.911.

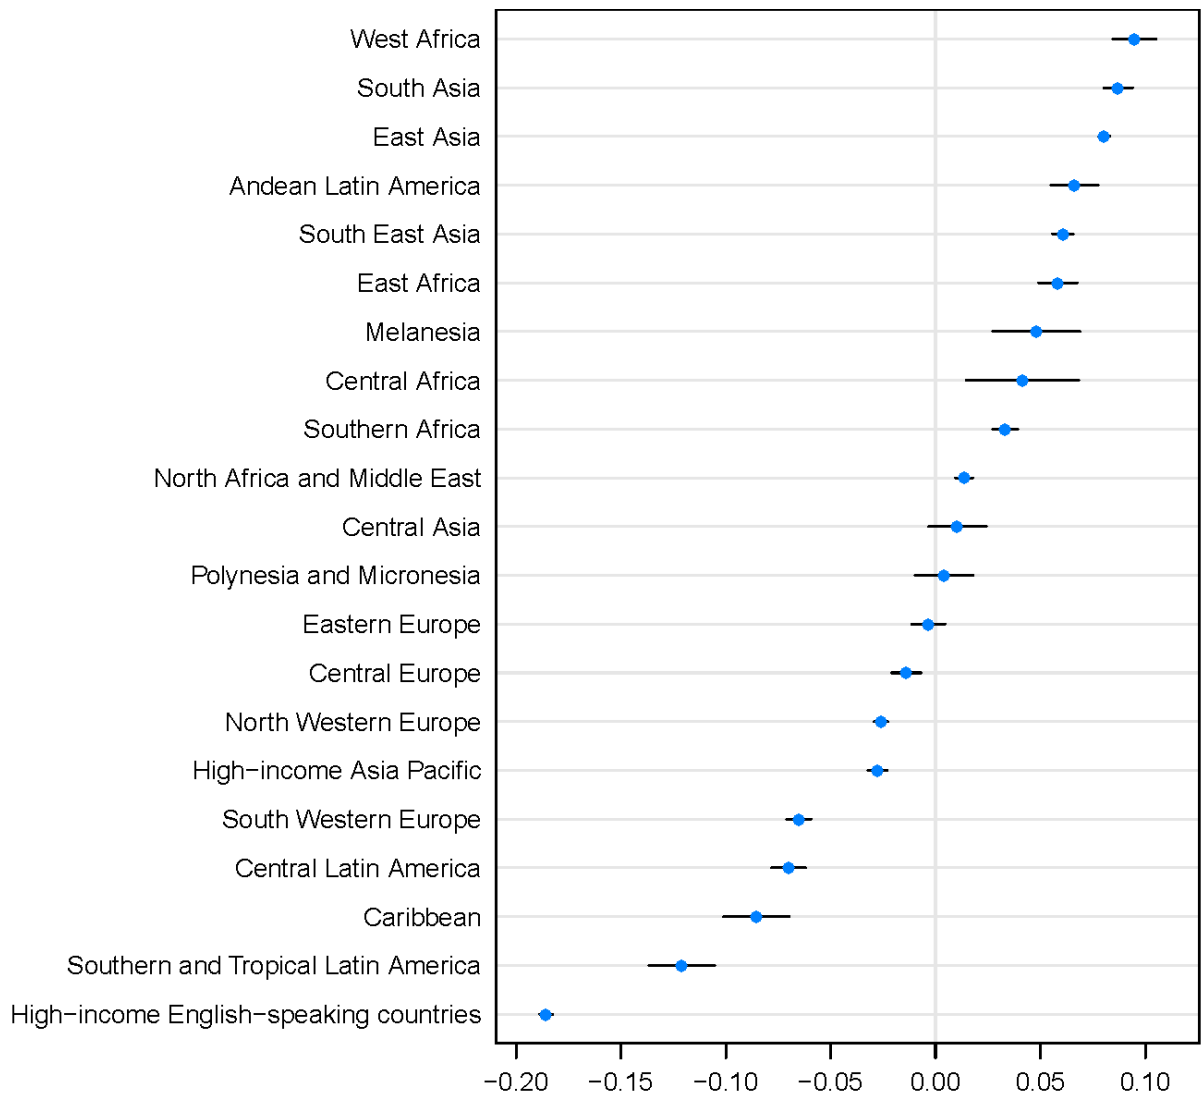

| <b>Primary outcome: prevalence of raised blood pressure (SBP <math>\geq</math>140 mmHg or DBP <math>\geq</math>90 mmHg)</b>                                 |                              |
|-------------------------------------------------------------------------------------------------------------------------------------------------------------|------------------------------|
| <b>Independent variables: mean SBP and prevalence (SBP <math>\geq</math>160 mmHg or DBP <math>\geq</math>95 mmHg or use of antihypertensive medication)</b> |                              |
| <b>Variables</b>                                                                                                                                            | <b>Coefficients (95% CI)</b> |
| Intercept                                                                                                                                                   | -0.089 (-0.13, -0.051)       |
| Mean SBP (centred at 130 mmHg)                                                                                                                              | 0.038 (0.037, 0.038)         |
| Probit-transformed prevalence (SBP $\geq$ 160 mmHg or DBP $\geq$ 95 mmHg or use of antihypertensive medication)                                             | 0.29 (0.29, 0.30)            |
| Mean age of age group (centred at 50 years)                                                                                                                 | -0.0084 (-0.0086, -0.0081)   |
| Male sex                                                                                                                                                    | 0.0063 (0.00012, 0.012)      |
| Study mid-year (per one more recent year since 1975)                                                                                                        | -0.0052 (-0.0054, -0.0050)   |
| Natural logarithm of per-capita gross domestic product                                                                                                      | 0.0022 (-0.00062, 0.0049)    |
| Mean SBP * mean age of age group                                                                                                                            | 0.00025 (0.00024, 0.00026)   |
| Probit-transformed prevalence * mean age of age group                                                                                                       | -0.0090 (-0.0092, -0.0088)   |
| Mean SBP * male sex                                                                                                                                         | 0.0036 (0.0031, 0.0040)      |
| Probit-transformed prevalence * male sex                                                                                                                    | -0.043 (-0.050, -0.036)      |
| Random effects for regions                                                                                                                                  | Yes                          |
| <b>Number of data points used to fit the model = 8,680</b>                                                                                                  |                              |

Traditional  $R^2$  is not clearly defined for mixed-effect models. The pseudo- $R^2$  for the model, which describes the proportion of variance explained by both fixed and random factors,<sup>12</sup> was 0.914.

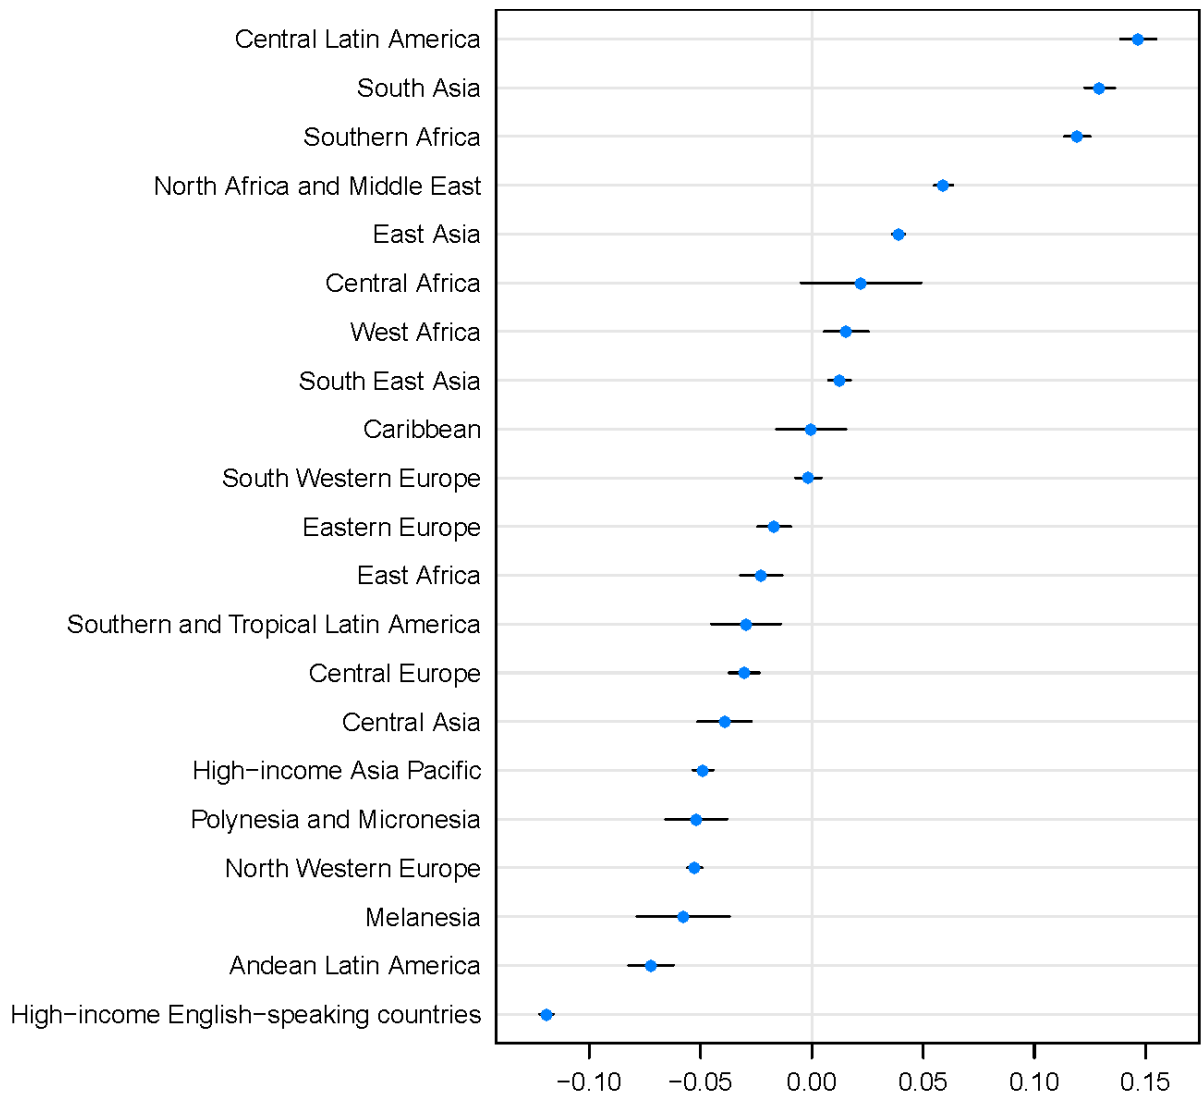

| <b>Primary outcome: prevalence of raised blood pressure (SBP <math>\geq</math>140 mmHg or DBP <math>\geq</math>90 mmHg)</b> |                               |
|-----------------------------------------------------------------------------------------------------------------------------|-------------------------------|
| <b>Independent variables: prevalence (SBP <math>\geq</math>160 mmHg) and prevalence (DBP <math>\geq</math>95 mmHg)</b>      |                               |
| <b>Variables</b>                                                                                                            | <b>Coefficients (95% CI)</b>  |
| Intercept                                                                                                                   | 0.82 (0.77, 0.86)             |
| Probit-transformed prevalence (SBP $\geq$ 160 mmHg)                                                                         | 0.64 (0.63, 0.64)             |
| Probit-transformed prevalence (DBP $\geq$ 85 mmHg)                                                                          | 0.33 (0.33, 0.34)             |
| Mean age of age group (centred at 50 years)                                                                                 | 0.0031 (0.0027, 0.0034)       |
| Male sex                                                                                                                    | -0.016 (-0.025, -0.0073)      |
| Study mid-year (per one more recent year since 1975)                                                                        | -0.00063 (-0.00086, -0.00040) |
| Natural logarithm of per-capita gross domestic product                                                                      | 0.0069 (0.0031, 0.011)        |
| Probit-transformed prevalence (SBP $\geq$ 160 mmHg) * mean age of age group                                                 | 0.0076 (0.0074, 0.0078)       |
| Probit-transformed prevalence (SBP $\geq$ 160 mmHg) * male sex                                                              | -0.092 (-0.098, -0.086)       |
| Probit-transformed prevalence (DBP $\geq$ 85 mmHg) * mean age of age group                                                  | -0.0070 (-0.0073, -0.0068)    |
| Probit-transformed prevalence (DBP $\geq$ 85 mmHg) * male sex                                                               | 0.027 (0.020, 0.035)          |
| Random effects for regions                                                                                                  | Yes                           |
| <b>Number of data points used to fit the model = 6,257</b>                                                                  |                               |

Traditional  $R^2$  is not clearly defined for mixed-effect models. The pseudo- $R^2$  for the model, which describes the proportion of variance explained by both fixed and random factors,<sup>12</sup> was 0.910.

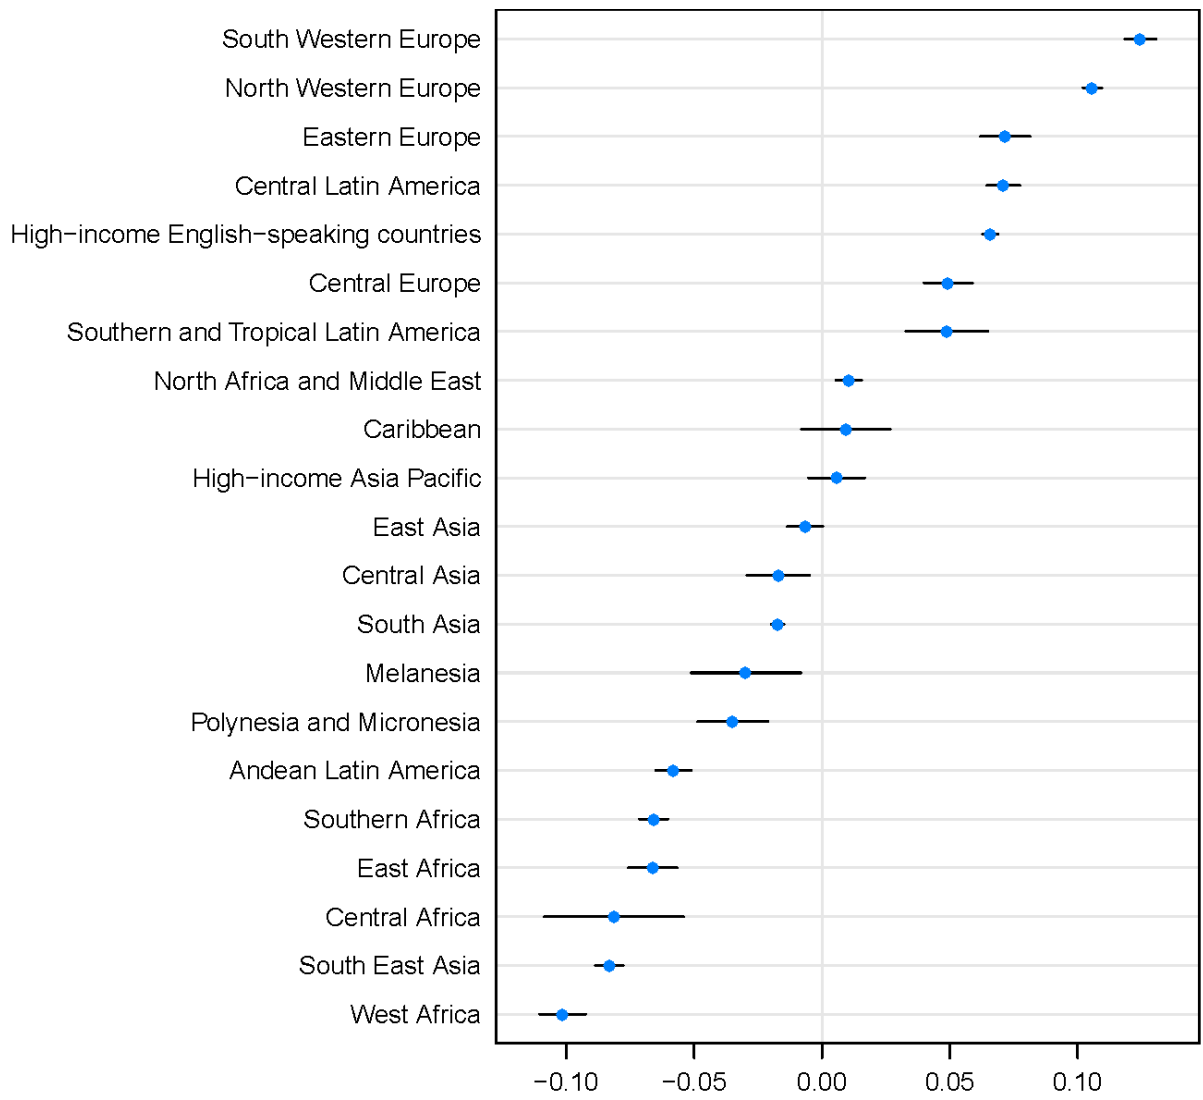

| <b>Primary outcome: prevalence of raised blood pressure (SBP <math>\geq</math>140 mmHg or DBP <math>\geq</math>90 mmHg)</b>                                                                                                                                                              |                               |
|------------------------------------------------------------------------------------------------------------------------------------------------------------------------------------------------------------------------------------------------------------------------------------------|-------------------------------|
| <b>Independent variables: mean SBP, mean DBP, prevalence (SBP <math>\geq</math>140 mmHg or DBP <math>\geq</math>90 mmHg or use of antihypertensive medication), and prevalence (SBP <math>\geq</math>160 mmHg or DBP <math>\geq</math>95 mmHg or use of antihypertensive medication)</b> |                               |
| <b>Variables</b>                                                                                                                                                                                                                                                                         | <b>Coefficients (95% CI)</b>  |
| Intercept                                                                                                                                                                                                                                                                                | -0.25 (-0.28, -0.22)          |
| Mean SBP (centred at 130 mmHg)                                                                                                                                                                                                                                                           | 0.020 (0.020, 0.021)          |
| Mean DBP (centred at 80 mmHg)                                                                                                                                                                                                                                                            | 0.017 (0.016, 0.017)          |
| Probit-transformed prevalence (SBP $\geq$ 140 mmHg or DBP $\geq$ 90 mmHg or use of antihypertensive medication)                                                                                                                                                                          | 0.62 (0.60, 0.63)             |
| Probit-transformed prevalence (SBP $\geq$ 160 mmHg or DBP $\geq$ 95 mmHg or use of antihypertensive medication)                                                                                                                                                                          | -0.14 (-0.15, -0.13)          |
| Mean age of age group (centred at 50 years)                                                                                                                                                                                                                                              | -0.0045 (-0.0049, -0.0041)    |
| Male sex                                                                                                                                                                                                                                                                                 | -0.061 (-0.069, -0.052)       |
| Study mid-year (per one more recent year since 1975)                                                                                                                                                                                                                                     | -0.0021 (-0.0023, -0.0019)    |
| Natural logarithm of per-capita gross domestic product                                                                                                                                                                                                                                   | -0.0079 (-0.011, -0.0050)     |
| Mean SBP * mean age of age group                                                                                                                                                                                                                                                         | 0.00057 (0.00055, 0.00059)    |
| Mean SBP * male sex                                                                                                                                                                                                                                                                      | -0.0032 (-0.0039, -0.0025)    |
| Mean DBP * mean age of age group                                                                                                                                                                                                                                                         | -0.00027 (-0.00029, -0.00025) |
| Mean DBP * male sex                                                                                                                                                                                                                                                                      | 0.00059 (-6.6e-05, 0.0012)    |
| Probit-transformed prevalence (SBP $\geq$ 140 mmHg or DBP $\geq$ 90 mmHg or use of antihypertensive medication) * mean age of age group                                                                                                                                                  | -0.0084 (-0.0091, -0.0078)    |
| Probit-transformed prevalence (SBP $\geq$ 140 mmHg or DBP $\geq$ 90 mmHg or use of antihypertensive medication) * male sex                                                                                                                                                               | 0.23 (0.21, 0.25)             |
| Probit-transformed prevalence (SBP $\geq$ 160 mmHg or DBP $\geq$ 95 mmHg or use of antihypertensive medication) * mean age of age group                                                                                                                                                  | -0.00098 (-0.0015, -0.00049)  |
| Probit-transformed prevalence (SBP $\geq$ 160 mmHg or DBP $\geq$ 95 mmHg or use of antihypertensive medication) * male sex                                                                                                                                                               | -0.16 (-0.18, -0.14)          |
| Random effects for regions                                                                                                                                                                                                                                                               | Yes                           |
| <b>Number of data points used to fit the model = 8,430</b>                                                                                                                                                                                                                               |                               |

Traditional  $R^2$  is not clearly defined for mixed-effect models. The pseudo- $R^2$  for the model, which describes the proportion of variance explained by both fixed and random factors,<sup>12</sup> was 0.938.

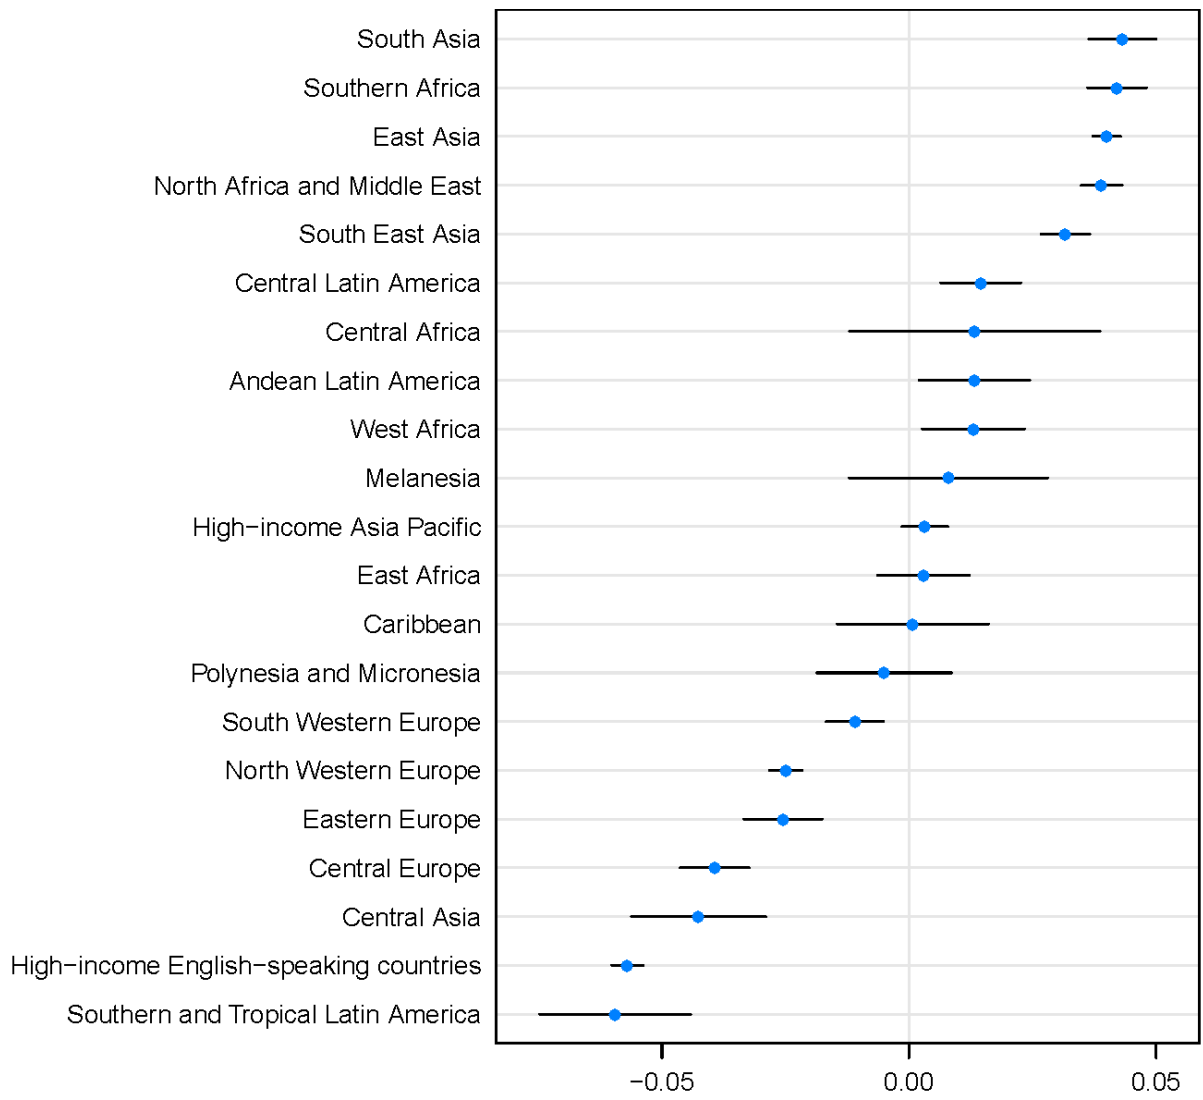



| <b>Primary outcome: prevalence of raised blood pressure (SBP <math>\geq</math>140 mmHg or DBP <math>\geq</math>90 mmHg)</b>                                                                                                                   |                               |
|-----------------------------------------------------------------------------------------------------------------------------------------------------------------------------------------------------------------------------------------------|-------------------------------|
| <b>Independent variables: mean SBP, mean DBP, prevalence (SBP <math>\geq</math>160 mmHg or DBP <math>\geq</math>95), and prevalence (SBP <math>\geq</math>160 mmHg or DBP <math>\geq</math>95 mmHg or use of antihypertensive medication)</b> |                               |
| <b>Variables</b>                                                                                                                                                                                                                              | <b>Coefficients (95% CI)</b>  |
| Intercept                                                                                                                                                                                                                                     | 0.076 (0.031, 0.12)           |
| Mean SBP (centred at 130 mmHg)                                                                                                                                                                                                                | 0.024 (0.023, 0.024)          |
| Mean DBP (centred at 80 mmHg)                                                                                                                                                                                                                 | 0.0070 (0.0060, 0.0081)       |
| Probit-transformed prevalence (SBP $\geq$ 160 mmHg or DBP $\geq$ 95 mmHg)                                                                                                                                                                     | 0.46 (0.44, 0.47)             |
| Probit-transformed prevalence (SBP $\geq$ 160 mmHg or DBP $\geq$ 95 mmHg or use of antihypertensive medication)                                                                                                                               | 0.019 (0.0090, 0.029)         |
| Mean age of age group (centred at 50 years)                                                                                                                                                                                                   | -0.0042 (-0.0050, -0.0035)    |
| Male sex                                                                                                                                                                                                                                      | -0.14 (-0.16, -0.12)          |
| Study mid-year (per one more recent year since 1975)                                                                                                                                                                                          | -0.0032 (-0.0035, -0.0030)    |
| Natural logarithm of per-capita gross domestic product                                                                                                                                                                                        | 0.0074 (0.0033, 0.011)        |
| Mean SBP * mean age of age group                                                                                                                                                                                                              | 0.00017 (0.00015, 0.00020)    |
| Mean SBP * male sex                                                                                                                                                                                                                           | 0.0072 (0.0065, 0.0080)       |
| Mean DBP * mean age of age group                                                                                                                                                                                                              | -5.4e-05 (-8.8e-05, -2.0e-05) |
| Mean DBP * male sex                                                                                                                                                                                                                           | 0.0029 (0.0017, 0.0041)       |
| Probit-transformed prevalence (SBP $\geq$ 160 mmHg or DBP $\geq$ 95 mmHg) * mean age of age group                                                                                                                                             | -0.0068 (-0.0075, -0.0061)    |
| Probit-transformed prevalence (SBP $\geq$ 160 mmHg or DBP $\geq$ 95 mmHg) * male sex                                                                                                                                                          | -0.10 (-0.12, -0.079)         |
| Probit-transformed prevalence (SBP $\geq$ 160 mmHg or DBP $\geq$ 95 mmHg or use of antihypertensive medication) * mean age of age group                                                                                                       | 0.00071 (0.00031, 0.0011)     |
| Probit-transformed prevalence (SBP $\geq$ 160 mmHg or DBP $\geq$ 95 mmHg or use of antihypertensive medication) * male sex                                                                                                                    | -0.048 (-0.059, -0.038)       |
| Random effects for regions                                                                                                                                                                                                                    | Yes                           |
| <b>Number of data points used to fit the model = 5,963</b>                                                                                                                                                                                    |                               |

Traditional  $R^2$  is not clearly defined for mixed-effect models. The pseudo- $R^2$  for the model, which describes the proportion of variance explained by both fixed and random factors,<sup>12</sup> was 0.905.

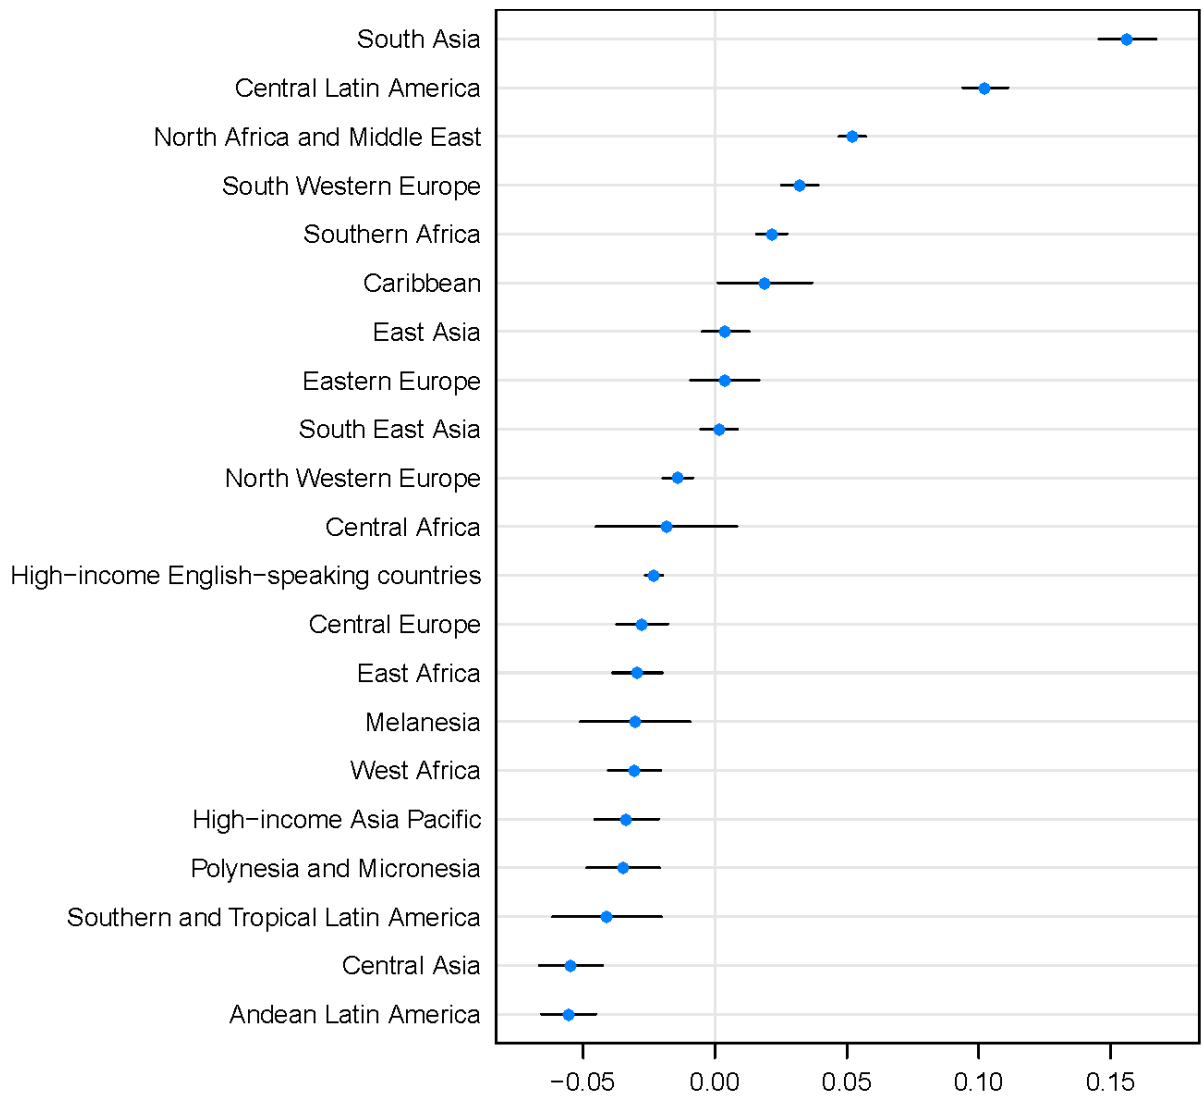

**Appendix Table 4:** Results of model validation.

| <b>Mean SBP, Test 1, Men</b> |                                            |                                                                    |                        |                       |           |           |             |                              |           |           |             |
|------------------------------|--------------------------------------------|--------------------------------------------------------------------|------------------------|-----------------------|-----------|-----------|-------------|------------------------------|-----------|-----------|-------------|
| <b>Data</b>                  |                                            | <b>No. of held out observations</b>                                | <b>Percent covered</b> | <b>Error (mmHg) †</b> |           |           |             | <b>Absolute error (mmHg)</b> |           |           |             |
|                              |                                            |                                                                    |                        | <b>Median</b>         | <b>Q1</b> | <b>Q3</b> | <b>(p*)</b> | <b>Median</b>                | <b>Q1</b> | <b>Q3</b> | <b>(p*)</b> |
| All                          |                                            | 3317                                                               | 86                     | 0.10                  | -4.17     | 4.24      | 0.3609      | 4.20                         | 1.95      | 7.30      | 0.3609      |
| Super-region                 | Central and Eastern Europe                 | 219                                                                | 95                     | -0.34                 | -3.59     | 2.82      | 0.7176      | 3.31                         | 1.68      | 5.86      | 0.7176      |
|                              | Central Asia, Middle East and North Africa | 501                                                                | 78                     | 2.84                  | -1.18     | 7.42      | 0.0000      | 5.04                         | 2.00      | 8.28      | 0.0000      |
|                              | East and Southeast Asia                    | 164                                                                | 88                     | -1.23                 | -4.69     | 2.33      | 0.5782      | 4.03                         | 1.68      | 7.18      | 0.5782      |
|                              | High-income Asia Pacific                   | <i>No data from this super-region were among the held-out data</i> |                        |                       |           |           |             |                              |           |           |             |
|                              | High-income Western countries              | 1,666                                                              | 89                     | -0.93                 | -4.96     | 3.11      | 0.0233      | 4.09                         | 1.94      | 6.89      | 0.0233      |
|                              | Latin America and Caribbean                | 342                                                                | 83                     | 1.11                  | -3.13     | 5.88      | 0.0835      | 4.83                         | 2.12      | 7.79      | 0.0835      |
|                              | Oceania                                    | 95                                                                 | 76                     | 1.54                  | -2.55     | 4.98      | 0.1810      | 4.23                         | 1.82      | 8.06      | 0.1810      |
|                              | South Asia                                 | 42                                                                 | 90                     | -1.08                 | -4.47     | 2.36      | 0.6070      | 3.61                         | 1.25      | 7.31      | 0.6070      |
| Sub-Saharan Africa           | 288                                        | 82                                                                 | 1.17                   | -3.29                 | 5.54      | 0.1402    | 4.37        | 2.00                         | 7.85      | 0.1402    |             |
| Urban or rural studies       | Rural                                      | 385                                                                | 81                     | 0.07                  | -4.46     | 5.07      | 0.3991      | 4.61                         | 2.00      | 8.49      | 0.3991      |
|                              | Urban                                      | 1,023                                                              | 83                     | 0.23                  | -3.69     | 4.54      | 0.2371      | 4.08                         | 1.79      | 7.48      | 0.2371      |
|                              | Both rural and urban                       | 1,909                                                              | 88                     | 0.09                  | -4.36     | 4.07      | 0.9709      | 4.17                         | 2.01      | 6.99      | 0.9709      |
| Study representative-ness    | Community                                  | 1,296                                                              | 81                     | -0.59                 | -4.79     | 4.39      | 0.8630      | 4.62                         | 2.05      | 8.18      | 0.8630      |
|                              | Subnational                                | 661                                                                | 87                     | 0.10                  | -3.91     | 4.19      | 0.2964      | 4.09                         | 1.86      | 7.29      | 0.2964      |
|                              | National                                   | 1,360                                                              | 90                     | 0.54                  | -3.75     | 4.17      | 0.3989      | 3.99                         | 1.87      | 6.61      | 0.3989      |
| Age band                     | 18-40                                      | 1,032                                                              | 86                     | 0.14                  | -3.86     | 3.53      | 0.4874      | 3.71                         | 1.73      | 6.30      | 0.4874      |
|                              | 40-60                                      | 1,060                                                              | 83                     | 0.17                  | -3.53     | 4.27      | 0.2538      | 3.91                         | 1.84      | 6.83      | 0.2538      |
|                              | 60 and above                               | 1,225                                                              | 88                     | 0.03                  | -5.24     | 4.86      | 0.9392      | 5.00                         | 2.35      | 8.87      | 0.9392      |
| Years                        | 1975-1989                                  | 585                                                                | 87                     | 0.31                  | -4.35     | 4.25      | 0.6852      | 4.28                         | 2.02      | 7.14      | 0.6852      |
|                              | 1990-1999                                  | 743                                                                | 86                     | -0.86                 | -5.63     | 3.51      | 0.1383      | 4.64                         | 2.17      | 7.70      | 0.1383      |
|                              | 2000-2009                                  | 1,444                                                              | 83                     | 0.10                  | -3.83     | 4.60      | 0.2735      | 4.16                         | 1.91      | 7.54      | 0.2735      |
|                              | 2010-2015                                  | 545                                                                | 92                     | 0.91                  | -3.04     | 4.40      | 0.0688      | 3.75                         | 1.66      | 6.40      | 0.0688      |
| Data density                 | Data poor                                  | 147                                                                | 88                     | 0.39                  | -4.15     | 2.91      | 0.6507      | 3.60                         | 1.65      | 6.32      | 0.6507      |
|                              | Average data density                       | 580                                                                | 85                     | -0.21                 | -4.03     | 3.50      | 0.7372      | 3.78                         | 1.43      | 7.12      | 0.7372      |
|                              | Data rich                                  | 2,590                                                              | 86                     | 0.23                  | -4.19     | 4.54      | 0.2018      | 4.38                         | 2.06      | 7.42      | 0.2018      |

| Mean SBP, Test 1, Women   |                                            |                              |                 |                |       |      |        |                       |      |       |        |
|---------------------------|--------------------------------------------|------------------------------|-----------------|----------------|-------|------|--------|-----------------------|------|-------|--------|
| Data                      |                                            | No. of held out observations | Percent covered | Error (mmHg) † |       |      |        | Absolute error (mmHg) |      |       |        |
|                           |                                            |                              |                 | Median         | Q1    | Q3   | (p*)   | Median                | Q1   | Q3    | (p*)   |
| All                       |                                            | 2,717                        | 89              | 0.99           | -3.21 | 5.33 | 0.0038 | 4.42                  | 2.00 | 7.73  | 0.0038 |
| Super-region              | Central and Eastern Europe                 | 162                          | 93              | 4.86           | 1.61  | 7.06 | 0.0034 | 5.36                  | 3.16 | 7.52  | 0.0034 |
|                           | Central Asia, Middle East and North Africa | 255                          | 89              | 0.31           | -2.94 | 5.14 | 0.4790 | 3.72                  | 1.57 | 7.17  | 0.4790 |
|                           | East and Southeast Asia                    | 477                          | 86              | -0.02          | -5.23 | 3.31 | 0.5184 | 4.18                  | 1.96 | 8.10  | 0.5184 |
|                           | High-income Asia Pacific                   | 120                          | 86              | 8.18           | 6.09  | 9.92 | 0.0000 | 8.31                  | 6.21 | 10.02 | 0.0000 |
|                           | High-income Western countries              | 872                          | 89              | 0.90           | -3.14 | 4.74 | 0.1460 | 4.07                  | 1.92 | 7.55  | 0.1460 |
|                           | Latin America and Caribbean                | 323                          | 92              | 0.13           | -3.13 | 4.67 | 0.3148 | 4.06                  | 1.77 | 7.00  | 0.3148 |
|                           | Oceania                                    | 132                          | 82              | 0.73           | -3.29 | 4.96 | 0.4188 | 4.33                  | 2.05 | 8.80  | 0.4188 |
|                           | South Asia                                 | 59                           | 93              | 0.17           | -4.63 | 4.52 | 0.9657 | 4.62                  | 2.17 | 8.37  | 0.9657 |
|                           | Sub-Saharan Africa                         | 317                          | 88              | -0.30          | -3.72 | 5.10 | 0.6070 | 4.29                  | 2.14 | 7.38  | 0.6070 |
| Urban or rural studies    | Rural                                      | 378                          | 85              | 1.74           | -3.30 | 7.32 | 0.0844 | 5.26                  | 2.70 | 9.15  | 0.0844 |
|                           | Urban                                      | 776                          | 87              | 0.86           | -2.87 | 4.75 | 0.0549 | 3.84                  | 1.84 | 7.46  | 0.0549 |
|                           | Both rural and urban                       | 1,563                        | 91              | 0.97           | -3.47 | 5.29 | 0.1177 | 4.46                  | 2.03 | 7.50  | 0.1177 |
| Study representative-ness | Community                                  | 1,069                        | 86              | 0.42           | -3.96 | 5.09 | 0.2525 | 4.62                  | 2.02 | 8.27  | 0.2525 |
|                           | Subnational                                | 440                          | 83              | 2.12           | -2.44 | 6.16 | 0.0425 | 5.10                  | 2.24 | 8.92  | 0.0425 |
|                           | National                                   | 1,208                        | 93              | 1.17           | -2.83 | 5.16 | 0.0480 | 4.02                  | 1.88 | 7.00  | 0.0480 |
| Age band                  | 18-40                                      | 909                          | 92              | 0.86           | -2.33 | 4.10 | 0.0001 | 3.27                  | 1.60 | 5.79  | 0.0001 |
|                           | 40-60                                      | 882                          | 85              | 1.04           | -3.12 | 5.52 | 0.0014 | 4.49                  | 2.03 | 7.70  | 0.0014 |
|                           | 60 and above                               | 926                          | 89              | 1.10           | -4.88 | 6.99 | 0.0130 | 5.92                  | 2.82 | 10.19 | 0.0130 |
| Years                     | 1975-1989                                  | 453                          | 81              | 1.27           | -3.83 | 5.92 | 0.0509 | 4.87                  | 2.14 | 9.18  | 0.0509 |
|                           | 1990-1999                                  | 610                          | 87              | 1.62           | -2.76 | 5.27 | 0.0943 | 4.16                  | 2.10 | 7.21  | 0.0943 |
|                           | 2000-2009                                  | 1,180                        | 89              | 1.07           | -3.01 | 5.47 | 0.0370 | 4.56                  | 2.02 | 7.87  | 0.0370 |
|                           | 2010-2015                                  | 474                          | 97              | -0.20          | -4.19 | 4.35 | 0.9349 | 4.23                  | 1.78 | 7.36  | 0.9349 |
| Data density              | Data poor                                  | 152                          | 86              | -2.19          | -5.31 | 1.27 | 0.2379 | 4.42                  | 2.04 | 7.65  | 0.2379 |
|                           | Average data density                       | 547                          | 89              | -0.04          | -4.32 | 4.42 | 0.6762 | 4.40                  | 2.05 | 7.38  | 0.6762 |
|                           | Data rich                                  | 2,018                        | 89              | 1.52           | -2.74 | 5.73 | 0.0008 | 4.43                  | 1.99 | 7.82  | 0.0008 |

| Mean SBP, Test 2, Men     |                                            |                                             |                 |                |       |        |        |                       |      |        |        |
|---------------------------|--------------------------------------------|---------------------------------------------|-----------------|----------------|-------|--------|--------|-----------------------|------|--------|--------|
| Data                      |                                            | No. of held out observations                | Percent covered | Error (mmHg) † |       |        |        | Absolute error (mmHg) |      |        |        |
|                           |                                            |                                             |                 | Median         | Q1    | Q3     | (p*)   | Median                | Q1   | Q3     | (p*)   |
| All                       |                                            | 3,512                                       | 74              | 0.71           | -2.63 | 4.37   | 0.0004 | 3.46                  | 1.65 | 6.43   | 0.0004 |
| Super-region              | Central and Eastern Europe                 | 368                                         | 74              | 0.34           | -3.09 | 3.44   | 0.4494 | 3.30                  | 1.64 | 6.75   | 0.4494 |
|                           | Central Asia, Middle East and North Africa | 441                                         | 67              | 2.04           | -1.95 | 6.27   | 0.0023 | 4.50                  | 1.99 | 7.56   | 0.0023 |
|                           | East and Southeast Asia                    | 353                                         | 66              | -0.32          | -4.74 | 3.46   | 0.5541 | 4.05                  | 1.89 | 7.03   | 0.5541 |
|                           | High-income Asia Pacific                   | 362                                         | 75              | 0.67           | -1.78 | 5.34   | 0.0088 | 3.10                  | 1.45 | 6.17   | 0.0088 |
|                           | High-income Western countries              | 1,127                                       | 79              | 0.52           | -2.24 | 3.50   | 0.0748 | 2.95                  | 1.39 | 5.40   | 0.0748 |
|                           | Latin America and Caribbean                | 282                                         | 73              | 1.49           | -2.85 | 5.65   | 0.0717 | 4.44                  | 1.99 | 7.42   | 0.0717 |
|                           | Oceania                                    | 108                                         | 81              | -0.80          | -3.35 | 2.94   | 0.8421 | 3.19                  | 1.49 | 6.76   | 0.8421 |
|                           | South Asia                                 | 191                                         | 74              | -1.68          | -4.71 | 1.69   | 0.1179 | 3.41                  | 1.69 | 5.99   | 0.1179 |
| Sub-Saharan Africa        | 280                                        | 75                                          | 2.49            | -1.15          | 5.22  | 0.0103 | 3.90   | 2.06                  | 6.38 | 0.0103 |        |
| Urban or rural studies    | Rural                                      | 508                                         | 68              | 1.25           | -2.67 | 5.09   | 0.0523 | 3.92                  | 1.89 | 7.28   | 0.0523 |
|                           | Urban                                      | 2,107                                       | 78              | 0.52           | -2.52 | 4.21   | 0.0179 | 3.32                  | 1.58 | 6.09   | 0.0179 |
|                           | Both rural and urban                       | 897                                         | 69              | 0.96           | -2.89 | 4.39   | 0.0545 | 3.74                  | 1.75 | 7.04   | 0.0545 |
| Study representative-ness | Community                                  | 1,346                                       | 68              | 0.78           | -3.41 | 4.32   | 0.2354 | 3.90                  | 1.82 | 7.09   | 0.2354 |
|                           | Subnational                                | 551                                         | 72              | 0.55           | -2.93 | 4.38   | 0.0901 | 3.70                  | 1.75 | 6.29   | 0.0901 |
|                           | National                                   | 1,615                                       | 80              | 0.75           | -2.12 | 4.39   | 0.0028 | 3.12                  | 1.48 | 6.01   | 0.0028 |
| Age band                  | 18-40                                      | 1,131                                       | 77              | 0.24           | -2.44 | 3.22   | 0.5218 | 2.82                  | 1.30 | 5.23   | 0.5218 |
|                           | 40-60                                      | 1,103                                       | 73              | 0.68           | -2.44 | 4.06   | 0.0185 | 3.33                  | 1.59 | 6.04   | 0.0185 |
|                           | 60 and above                               | 1,278                                       | 72              | 1.28           | -2.90 | 5.80   | 0.0000 | 4.43                  | 2.04 | 7.88   | 0.0000 |
| Years                     | 1975-1989                                  | 558                                         | 74              | -0.16          | -2.65 | 3.07   | 0.5002 | 2.76                  | 1.36 | 5.55   | 0.5002 |
|                           | 1990-1999                                  | 444                                         | 70              | 0.90           | -3.04 | 3.89   | 0.2907 | 3.43                  | 1.90 | 6.02   | 0.2907 |
|                           | 2000-2009                                  | 1,785                                       | 72              | 0.61           | -2.95 | 4.30   | 0.0980 | 3.60                  | 1.72 | 6.72   | 0.0980 |
|                           | 2010-2015                                  | 725                                         | 83              | 1.85           | -1.38 | 5.51   | 0.0002 | 3.74                  | 1.61 | 6.48   | 0.0002 |
| Data density              | Data poor                                  | <i>Not applicable for source-based test</i> |                 |                |       |        |        |                       |      |        |        |
|                           | Average data density                       | 545                                         | 81              | -0.08          | -3.77 | 2.61   | 0.7749 | 3.31                  | 1.43 | 6.37   | 0.7749 |
|                           | Data rich                                  | 2,967                                       | 73              | 0.85           | -2.46 | 4.61   | 0.0001 | 3.50                  | 1.69 | 6.43   | 0.0001 |
| Hold out pattern          | Post-2000 data removed                     | 1,412                                       | 75              | 1.26           | -2.30 | 5.29   | 0.0003 | 3.95                  | 1.83 | 6.69   | 0.0003 |
|                           | Random set of data removed                 | 2,100                                       | 73              | 0.36           | -2.81 | 3.59   | 0.1181 | 3.23                  | 1.52 | 6.19   | 0.1181 |

| <b>Mean SBP, Test 2, Women</b> |                                            |                                             |                        |                       |           |           |             |                              |           |           |             |
|--------------------------------|--------------------------------------------|---------------------------------------------|------------------------|-----------------------|-----------|-----------|-------------|------------------------------|-----------|-----------|-------------|
| <b>Data</b>                    |                                            | <b>No. of held out observations</b>         | <b>Percent covered</b> | <b>Error (mmHg) †</b> |           |           |             | <b>Absolute error (mmHg)</b> |           |           |             |
|                                |                                            |                                             |                        | <b>Median</b>         | <b>Q1</b> | <b>Q3</b> | <b>(p*)</b> | <b>Median</b>                | <b>Q1</b> | <b>Q3</b> | <b>(p*)</b> |
| All                            |                                            | 3,428                                       | 77                     | 0.22                  | -3.27     | 3.75      | 0.3868      | 3.51                         | 1.56      | 6.29      | 0.3868      |
| Super-region                   | Central and Eastern Europe                 | 283                                         | 76                     | -0.23                 | -4.09     | 2.28      | 0.4455      | 3.05                         | 1.28      | 6.32      | 0.4455      |
|                                | Central Asia, Middle East and North Africa | 420                                         | 73                     | 1.94                  | -2.00     | 5.92      | 0.0314      | 4.47                         | 1.96      | 7.40      | 0.0314      |
|                                | East and Southeast Asia                    | 341                                         | 67                     | 0.43                  | -3.53     | 4.03      | 0.8743      | 3.78                         | 1.61      | 7.16      | 0.8743      |
|                                | High-income Asia Pacific                   | 371                                         | 75                     | 0.83                  | -2.37     | 5.39      | 0.1126      | 3.58                         | 1.93      | 6.15      | 0.1126      |
|                                | High-income Western countries              | 1,135                                       | 80                     | 0.09                  | -3.09     | 3.16      | 0.7701      | 3.12                         | 1.45      | 5.74      | 0.7701      |
|                                | Latin America and Caribbean                | 310                                         | 84                     | -1.35                 | -4.08     | 1.56      | 0.2606      | 3.38                         | 1.47      | 5.77      | 0.2606      |
|                                | Oceania                                    | 109                                         | 85                     | 0.36                  | -3.60     | 3.52      | 0.9094      | 3.60                         | 1.37      | 6.32      | 0.9094      |
|                                | South Asia                                 | 193                                         | 77                     | -1.04                 | -4.45     | 2.24      | 0.5760      | 3.75                         | 1.92      | 6.32      | 0.5760      |
|                                | Sub-Saharan Africa                         | 266                                         | 80                     | 0.34                  | -3.73     | 4.70      | 0.6762      | 4.12                         | 1.69      | 6.57      | 0.6762      |
| Urban or rural studies         | Rural                                      | 507                                         | 72                     | -0.17                 | -4.17     | 4.15      | 0.9537      | 4.17                         | 1.97      | 6.78      | 0.9537      |
|                                | Urban                                      | 891                                         | 72                     | -0.24                 | -4.25     | 3.34      | 0.9108      | 3.76                         | 1.67      | 6.78      | 0.9108      |
|                                | Both rural and urban                       | 2,030                                       | 80                     | 0.44                  | -2.75     | 3.90      | 0.2370      | 3.23                         | 1.46      | 5.84      | 0.2370      |
| Study representative-ness      | Community                                  | 1,353                                       | 71                     | -0.11                 | -4.29     | 3.97      | 0.9556      | 4.13                         | 1.81      | 7.04      | 0.9556      |
|                                | Subnational                                | 489                                         | 80                     | 0.11                  | -2.91     | 3.13      | 0.9065      | 3.03                         | 1.34      | 5.60      | 0.9065      |
|                                | National                                   | 1,586                                       | 82                     | 0.45                  | -2.73     | 3.90      | 0.2533      | 3.22                         | 1.47      | 5.76      | 0.2533      |
| Age band                       | 18-40                                      | 1,125                                       | 80                     | 0.09                  | -2.68     | 3.05      | 0.4368      | 2.86                         | 1.25      | 4.91      | 0.4368      |
|                                | 40-60                                      | 1,075                                       | 79                     | -0.03                 | -3.57     | 3.03      | 0.9828      | 3.29                         | 1.48      | 5.71      | 0.9828      |
|                                | 60 and above                               | 1,228                                       | 73                     | 0.71                  | -3.90     | 5.51      | 0.0194      | 4.63                         | 2.19      | 8.00      | 0.0194      |
| Years                          | 1975-1989                                  | 457                                         | 70                     | -1.64                 | -4.48     | 2.34      | 0.4435      | 3.75                         | 1.96      | 6.18      | 0.4435      |
|                                | 1990-1999                                  | 513                                         | 68                     | 0.43                  | -3.37     | 4.24      | 0.6315      | 3.87                         | 1.83      | 6.47      | 0.6315      |
|                                | 2000-2009                                  | 1,742                                       | 76                     | 0.64                  | -2.76     | 4.06      | 0.1798      | 3.44                         | 1.53      | 6.41      | 0.1798      |
|                                | 2010-2015                                  | 716                                         | 90                     | 0.05                  | -3.24     | 3.60      | 0.9984      | 3.33                         | 1.30      | 5.73      | 0.9984      |
| Data density                   | Data poor                                  | <i>Not applicable for source-based test</i> |                        |                       |           |           |             |                              |           |           |             |
|                                | Average data density                       | 566                                         | 81                     | 0.07                  | -3.34     | 3.97      | 0.4948      | 3.63                         | 1.58      | 6.57      | 0.4948      |
|                                | Data rich                                  | 2,862                                       | 76                     | 0.24                  | -3.25     | 3.71      | 0.5073      | 3.50                         | 1.55      | 6.21      | 0.5073      |
| Hold out pattern               | Post-2000 data removed                     | 1,325                                       | 84                     | 0.80                  | -2.70     | 4.35      | 0.1196      | 3.48                         | 1.58      | 6.19      | 0.1196      |
|                                | Random set of data removed                 | 2,103                                       | 73                     | -0.29                 | -3.68     | 3.38      | 0.9056      | 3.54                         | 1.53      | 6.33      | 0.9056      |

| Mean DBP, Test 1, Men     |                                            |                                                              |                 |                |       |        |        |                       |      |        |        |
|---------------------------|--------------------------------------------|--------------------------------------------------------------|-----------------|----------------|-------|--------|--------|-----------------------|------|--------|--------|
| Data                      |                                            | No. of held out observations                                 | Percent covered | Error (mmHg) † |       |        |        | Absolute error (mmHg) |      |        |        |
|                           |                                            |                                                              |                 | Median         | Q1    | Q3     | (p*)   | Median                | Q1   | Q3     | (p*)   |
| All                       |                                            | 3,317                                                        | 87              | 0.50           | -2.02 | 3.12   | 0.0003 | 2.61                  | 1.20 | 4.60   | 0.0003 |
| Super-region              | Central and Eastern Europe                 | 219                                                          | 93              | -0.32          | -2.32 | 1.56   | 0.1394 | 1.92                  | 0.92 | 3.28   | 0.1394 |
|                           | Central Asia, Middle East and North Africa | 501                                                          | 91              | -0.14          | -2.15 | 2.21   | 0.8818 | 2.16                  | 1.06 | 3.77   | 0.8818 |
|                           | East and Southeast Asia                    | 164                                                          | 90              | -0.62          | -2.97 | 1.69   | 0.1371 | 2.42                  | 1.00 | 4.62   | 0.1371 |
|                           | High-income Asia Pacific                   | <i>No data from this region were among the held-out data</i> |                 |                |       |        |        |                       |      |        |        |
|                           | High-income Western countries              | 1,666                                                        | 87              | 1.19           | -1.39 | 4.05   | 0.0000 | 2.79                  | 1.26 | 4.82   | 0.0000 |
|                           | Latin America and Caribbean                | 342                                                          | 85              | 0.16           | -2.56 | 3.04   | 0.2299 | 2.77                  | 1.20 | 4.99   | 0.2299 |
|                           | Oceania                                    | 95                                                           | 78              | 0.54           | -3.65 | 3.32   | 0.6087 | 3.57                  | 1.34 | 5.47   | 0.6087 |
|                           | South Asia                                 | 42                                                           | 93              | -4.27          | -5.72 | -3.06  | 0.0001 | 4.27                  | 3.06 | 5.72   | 0.0001 |
| Sub-Saharan Africa        | 288                                        | 82                                                           | 0.35            | -2.41          | 2.53  | 0.8871 | 2.47   | 1.22                  | 4.75 | 0.8871 |        |
| Urban or rural studies    | Rural                                      | 385                                                          | 85              | -0.35          | -3.26 | 2.45   | 0.1929 | 2.97                  | 1.42 | 5.01   | 0.1929 |
|                           | Urban                                      | 1,023                                                        | 85              | 0.35           | -2.05 | 3.12   | 0.0190 | 2.60                  | 1.13 | 4.64   | 0.0190 |
|                           | Both rural and urban                       | 1,909                                                        | 89              | 0.72           | -1.72 | 3.28   | 0.0003 | 2.54                  | 1.19 | 4.48   | 0.0003 |
| Study representative-ness | Community                                  | 1,360                                                        | 88              | 0.72           | -1.68 | 3.32   | 0.0066 | 2.55                  | 1.19 | 4.63   | 0.0066 |
|                           | Subnational                                | 661                                                          | 88              | 1.05           | -1.42 | 3.88   | 0.0000 | 2.69                  | 1.24 | 4.76   | 0.0000 |
|                           | National                                   | 1,296                                                        | 86              | -0.03          | -2.64 | 2.52   | 0.8323 | 2.58                  | 1.19 | 4.55   | 0.8323 |
| Age band                  | 18-40                                      | 1,032                                                        | 88              | 0.68           | -1.82 | 3.24   | 0.0143 | 2.63                  | 1.22 | 4.39   | 0.0143 |
|                           | 40-60                                      | 1,060                                                        | 85              | 0.42           | -1.93 | 2.61   | 0.0493 | 2.26                  | 1.13 | 3.98   | 0.0493 |
|                           | 60 and above                               | 1,225                                                        | 88              | 0.43           | -2.26 | 3.77   | 0.0934 | 2.93                  | 1.28 | 5.22   | 0.0934 |
| Years                     | 1975-1989                                  | 585                                                          | 86              | 0.93           | -1.68 | 3.70   | 0.0023 | 2.60                  | 1.23 | 4.72   | 0.0023 |
|                           | 1990-1999                                  | 743                                                          | 85              | 0.12           | -2.38 | 2.50   | 0.6996 | 2.46                  | 1.04 | 4.62   | 0.6996 |
|                           | 2000-2009                                  | 1,444                                                        | 87              | 0.42           | -2.03 | 2.97   | 0.0660 | 2.55                  | 1.18 | 4.35   | 0.0660 |
|                           | 2010-2015                                  | 545                                                          | 92              | 1.18           | -1.84 | 3.95   | 0.0014 | 2.91                  | 1.48 | 4.82   | 0.0014 |
| Data density              | Data poor                                  | 147                                                          | 92              | 0.50           | -1.77 | 3.23   | 0.4867 | 2.53                  | 1.17 | 3.75   | 0.4867 |
|                           | Average data density                       | 580                                                          | 84              | -1.15          | -3.86 | 1.35   | 0.0000 | 2.57                  | 1.24 | 4.73   | 0.0000 |
|                           | Data rich                                  | 2,590                                                        | 88              | 0.87           | -1.66 | 3.58   | 0.0000 | 2.62                  | 1.19 | 4.62   | 0.0000 |

| Mean DBP, Test 1, Women   |                                            |                              |                 |                |       |      |        |                       |      |      |        |
|---------------------------|--------------------------------------------|------------------------------|-----------------|----------------|-------|------|--------|-----------------------|------|------|--------|
| Data                      |                                            | No. of held out observations | Percent covered | Error (mmHg) † |       |      |        | Absolute error (mmHg) |      |      |        |
|                           |                                            |                              |                 | Median         | Q1    | Q3   | (p*)   | Median                | Q1   | Q3   | (p*)   |
| All                       |                                            | 2,717                        | 88              | 0.32           | -2.48 | 2.99 | 0.0833 | 2.76                  | 1.33 | 4.81 | 0.0833 |
| Super-region              | Central and Eastern Europe                 | 162                          | 81              | 3.66           | 1.62  | 5.96 | 0.0000 | 4.02                  | 2.29 | 5.96 | 0.0000 |
|                           | Central Asia, Middle East and North Africa | 255                          | 92              | -0.36          | -2.40 | 2.28 | 0.8480 | 2.37                  | 1.33 | 3.92 | 0.8480 |
|                           | East and Southeast Asia                    | 477                          | 88              | -1.70          | -4.35 | 1.09 | 0.0000 | 3.01                  | 1.33 | 5.38 | 0.0000 |
|                           | High-income Asia Pacific                   | 120                          | 98              | -0.20          | -1.92 | 0.91 | 0.1000 | 1.25                  | 0.52 | 2.69 | 0.1000 |
|                           | High-income Western countries              | 872                          | 86              | 2.03           | -0.85 | 4.42 | 0.0000 | 3.13                  | 1.55 | 5.09 | 0.0000 |
|                           | Latin America and Caribbean                | 323                          | 93              | -0.10          | -2.45 | 2.36 | 0.7987 | 2.40                  | 1.11 | 3.76 | 0.7987 |
|                           | Oceania                                    | 132                          | 85              | -0.40          | -3.37 | 2.42 | 0.6792 | 2.96                  | 1.40 | 4.93 | 0.6792 |
|                           | South Asia                                 | 59                           | 92              | -1.92          | -2.93 | 0.37 | 0.0681 | 2.05                  | 1.13 | 2.93 | 0.0681 |
|                           | Sub-Saharan Africa                         | 317                          | 86              | -0.51          | -3.19 | 1.84 | 0.1067 | 2.70                  | 1.27 | 4.55 | 0.1067 |
| Urban or rural studies    | Rural                                      | 378                          | 85              | 0.52           | -2.52 | 3.12 | 0.5675 | 2.92                  | 1.30 | 5.07 | 0.5675 |
|                           | Urban                                      | 776                          | 86              | 1.06           | -2.12 | 3.61 | 0.0009 | 2.88                  | 1.35 | 4.91 | 0.0009 |
|                           | Both rural and urban                       | 1,563                        | 90              | -0.02          | -2.65 | 2.73 | 0.7970 | 2.70                  | 1.33 | 4.73 | 0.7970 |
| Study representative-ness | Community                                  | 1,069                        | 85              | 0.48           | -2.65 | 3.49 | 0.0471 | 2.96                  | 1.46 | 5.11 | 0.0471 |
|                           | Subnational                                | 440                          | 88              | 1.02           | -1.66 | 3.49 | 0.0313 | 2.74                  | 1.30 | 4.66 | 0.0313 |
|                           | National                                   | 1,208                        | 91              | 0.07           | -2.55 | 2.59 | 0.6670 | 2.59                  | 1.27 | 4.57 | 0.6670 |
| Age band                  | 18-40                                      | 909                          | 87              | 0.83           | -2.05 | 3.12 | 0.0001 | 2.70                  | 1.35 | 4.54 | 0.0001 |
|                           | 40-60                                      | 882                          | 86              | 0.35           | -2.08 | 2.70 | 0.0587 | 2.44                  | 1.20 | 4.27 | 0.0587 |
|                           | 60 and above                               | 926                          | 92              | 0.03           | -3.34 | 3.12 | 0.3582 | 3.28                  | 1.59 | 5.33 | 0.3582 |
| Years                     | 1980-1989                                  | 453                          | 82              | 1.82           | -1.70 | 4.13 | 0.0005 | 3.21                  | 1.80 | 5.22 | 0.0005 |
|                           | 1990-1999                                  | 610                          | 89              | 0.80           | -1.83 | 2.86 | 0.0887 | 2.50                  | 1.19 | 4.21 | 0.0887 |
|                           | 2000-2009                                  | 1,180                        | 88              | 0.13           | -2.59 | 3.01 | 0.5900 | 2.75                  | 1.36 | 5.02 | 0.5900 |
|                           | 2010-2014                                  | 474                          | 93              | -0.69          | -3.15 | 1.79 | 0.0424 | 2.66                  | 1.16 | 4.59 | 0.0424 |
| Data density              | Data poor                                  | 152                          | 88              | 0.06           | -2.98 | 2.20 | 0.6892 | 2.66                  | 1.40 | 4.49 | 0.6892 |
|                           | Average data density                       | 547                          | 88              | -0.85          | -3.32 | 1.92 | 0.0059 | 2.59                  | 1.36 | 4.36 | 0.0059 |
|                           | Data rich                                  | 2,018                        | 88              | 0.66           | -2.14 | 3.54 | 0.0004 | 2.84                  | 1.31 | 4.98 | 0.0004 |



| Mean DBP, Test 2, Men     |                                            |                                             |                 |                |       |      |        |                       |      |      |        |
|---------------------------|--------------------------------------------|---------------------------------------------|-----------------|----------------|-------|------|--------|-----------------------|------|------|--------|
| Data                      |                                            | No. of held out observations                | Percent covered | Error (mmHg) † |       |      |        | Absolute error (mmHg) |      |      |        |
|                           |                                            |                                             |                 | Median         | Q1    | Q3   | (p*)   | Median                | Q1   | Q3   | (p*)   |
| All                       |                                            | 3,512                                       | 79              | 0.25           | -1.84 | 2.55 | 0.0001 | 2.17                  | 0.98 | 4.00 | 0.0001 |
| Super-region              | Central and Eastern Europe                 | 368                                         | 79              | 0.21           | -1.78 | 2.53 | 0.0256 | 2.10                  | 0.93 | 3.94 | 0.0256 |
|                           | Central Asia, Middle East and North Africa | 441                                         | 84              | 0.25           | -1.58 | 2.51 | 0.0325 | 2.08                  | 0.85 | 3.65 | 0.0325 |
|                           | East and Southeast Asia                    | 353                                         | 77              | -0.26          | -2.41 | 1.94 | 0.6525 | 2.23                  | 1.14 | 3.66 | 0.6525 |
|                           | High-income Asia Pacific                   | 362                                         | 81              | -0.17          | -1.64 | 1.46 | 0.5731 | 1.59                  | 0.72 | 3.01 | 0.5731 |
|                           | High-income Western countries              | 1,127                                       | 75              | 0.43           | -1.68 | 2.78 | 0.0052 | 2.21                  | 1.08 | 4.17 | 0.0052 |
|                           | Latin America and Caribbean                | 282                                         | 79              | 0.51           | -2.02 | 3.91 | 0.0251 | 2.72                  | 1.23 | 4.90 | 0.0251 |
|                           | Oceania                                    | 108                                         | 72              | 0.69           | -2.17 | 3.33 | 0.5185 | 2.79                  | 1.46 | 5.11 | 0.5185 |
|                           | South Asia                                 | 191                                         | 83              | 0.83           | -0.84 | 2.53 | 0.0174 | 1.80                  | 0.84 | 3.18 | 0.0174 |
|                           | Sub-Saharan Africa                         | 280                                         | 82              | 0.02           | -2.41 | 2.64 | 0.7195 | 2.56                  | 1.30 | 4.11 | 0.7195 |
| Urban or rural studies    | Rural                                      | 508                                         | 76              | 0.85           | -1.67 | 3.03 | 0.0517 | 2.40                  | 1.20 | 4.21 | 0.0517 |
|                           | Urban                                      | 897                                         | 72              | 0.21           | -2.33 | 2.66 | 0.1727 | 2.47                  | 1.20 | 4.52 | 0.1727 |
|                           | Both rural and urban                       | 2,107                                       | 82              | 0.17           | -1.73 | 2.37 | 0.0012 | 2.00                  | 0.89 | 3.66 | 0.0012 |
| Study representative-ness | Community                                  | 1,346                                       | 74              | 0.17           | -2.36 | 2.55 | 0.3670 | 2.43                  | 1.19 | 4.37 | 0.3670 |
|                           | Subnational                                | 551                                         | 75              | 0.54           | -1.57 | 3.23 | 0.0029 | 2.25                  | 1.04 | 4.14 | 0.0029 |
|                           | National                                   | 1,615                                       | 84              | 0.24           | -1.56 | 2.40 | 0.0015 | 1.95                  | 0.87 | 3.51 | 0.0015 |
| Age band                  | 18-40                                      | 1,131                                       | 81              | -0.04          | -1.83 | 1.99 | 0.4810 | 1.88                  | 0.86 | 3.42 | 0.4810 |
|                           | 40-60                                      | 1,103                                       | 81              | 0.36           | -1.63 | 2.40 | 0.0076 | 2.03                  | 0.95 | 3.70 | 0.0076 |
|                           | 60 and above                               | 1,278                                       | 75              | 0.50           | -2.02 | 3.26 | 0.0004 | 2.60                  | 1.25 | 4.74 | 0.0004 |
| Years                     | 1980-1989                                  | 558                                         | 72              | -0.07          | -2.25 | 2.12 | 0.9127 | 2.18                  | 0.92 | 4.13 | 0.9127 |
|                           | 1990-1999                                  | 444                                         | 78              | 0.17           | -2.08 | 2.24 | 0.7435 | 2.17                  | 1.13 | 3.66 | 0.7435 |
|                           | 2000-2009                                  | 1,785                                       | 78              | 0.28           | -1.76 | 2.54 | 0.0023 | 2.16                  | 0.98 | 4.08 | 0.0023 |
|                           | 2010-2014                                  | 725                                         | 84              | 0.58           | -1.47 | 3.16 | 0.0000 | 2.15                  | 0.96 | 3.98 | 0.0000 |
| Data density              | Data poor                                  | <i>Not applicable for source-based test</i> |                 |                |       |      |        |                       |      |      |        |
|                           | Average data density                       | 545                                         | 84              | -0.33          | -2.34 | 1.83 | 0.2300 | 2.09                  | 0.97 | 3.81 | 0.2300 |
|                           | Data rich                                  | 2,967                                       | 77              | 0.36           | -1.73 | 2.70 | 0.0000 | 2.18                  | 0.99 | 4.05 | 0.0000 |
| Hold out pattern          | Post-2000 data removed                     | 1,412                                       | 79              | 0.75           | -1.33 | 3.30 | 0.0000 | 2.22                  | 0.99 | 4.34 | 0.0000 |
|                           | Random set of data removed                 | 2,100                                       | 78              | -0.09          | -2.14 | 2.09 | 0.7714 | 2.12                  | 0.98 | 3.89 | 0.7714 |

| <b>Mean DBP, Test 2, Women</b> |                                            |                                             |                        |                       |           |           |             |                              |           |           |             |
|--------------------------------|--------------------------------------------|---------------------------------------------|------------------------|-----------------------|-----------|-----------|-------------|------------------------------|-----------|-----------|-------------|
| <b>Data</b>                    |                                            | <b>No. of held out observations</b>         | <b>Percent covered</b> | <b>Error (mmHg) †</b> |           |           |             | <b>Absolute error (mmHg)</b> |           |           |             |
|                                |                                            |                                             |                        | <b>Median</b>         | <b>Q1</b> | <b>Q3</b> | <b>(p*)</b> | <b>Median</b>                | <b>Q1</b> | <b>Q3</b> | <b>(p*)</b> |
| All                            |                                            | 3,427                                       | 78                     | -0.07                 | -2.23     | 2.30      | 0.1631      | 2.27                         | 1.05      | 4.11      | 0.1631      |
| Super-region                   | Central and Eastern Europe                 | 283                                         | 79                     | -0.07                 | -2.70     | 1.94      | 0.5592      | 2.24                         | 1.18      | 3.73      | 0.5592      |
|                                | Central Asia, Middle East and North Africa | 420                                         | 79                     | -0.42                 | -2.69     | 2.21      | 0.9722      | 2.57                         | 1.30      | 4.20      | 0.9722      |
|                                | East and Southeast Asia                    | 341                                         | 74                     | -0.46                 | -2.60     | 1.62      | 0.3684      | 2.08                         | 0.89      | 4.11      | 0.3684      |
|                                | High-income Asia Pacific                   | 370                                         | 83                     | -0.73                 | -1.99     | 0.70      | 0.1222      | 1.51                         | 0.70      | 2.89      | 0.1222      |
|                                | High-income Western countries              | 1,135                                       | 73                     | 0.35                  | -2.06     | 3.05      | 0.0125      | 2.58                         | 1.14      | 4.54      | 0.0125      |
|                                | Latin America and Caribbean                | 310                                         | 90                     | 0.11                  | -1.79     | 2.54      | 0.1529      | 2.09                         | 0.89      | 3.46      | 0.1529      |
|                                | Oceania                                    | 109                                         | 74                     | 1.42                  | -2.57     | 3.34      | 0.0965      | 3.19                         | 1.56      | 5.78      | 0.0965      |
|                                | South Asia                                 | 193                                         | 88                     | 1.20                  | -0.24     | 2.46      | 0.0007      | 1.71                         | 0.90      | 3.06      | 0.0007      |
| Sub-Saharan Africa             | 266                                        | 78                                          | -1.17                  | -4.13                 | 1.71      | 0.0141    | 3.04        | 1.48                         | 4.68      | 0.0141    |             |
| Urban or rural studies         | Rural                                      | 507                                         | 73                     | -0.20                 | -2.92     | 2.37      | 0.5582      | 2.63                         | 1.21      | 4.61      | 0.5582      |
|                                | Urban                                      | 891                                         | 75                     | -0.35                 | -2.53     | 2.16      | 0.8884      | 2.34                         | 0.96      | 4.20      | 0.8884      |
|                                | Both rural and urban                       | 2,029                                       | 81                     | 0.06                  | -2.01     | 2.31      | 0.0388      | 2.17                         | 1.03      | 3.94      | 0.0388      |
| Study representative-ness      | Community                                  | 1,353                                       | 73                     | -0.37                 | -2.80     | 2.40      | 0.9347      | 2.63                         | 1.22      | 4.52      | 0.9347      |
|                                | Subnational                                | 489                                         | 81                     | 0.40                  | -1.62     | 2.56      | 0.0692      | 2.08                         | 0.99      | 3.82      | 0.0692      |
|                                | National                                   | 1,585                                       | 82                     | 0.00                  | -1.99     | 2.15      | 0.2662      | 2.07                         | 0.93      | 3.83      | 0.2662      |
| Age band                       | 18-40                                      | 1,125                                       | 79                     | -0.43                 | -2.36     | 1.64      | 0.0825      | 2.00                         | 0.95      | 3.66      | 0.0825      |
|                                | 40-60                                      | 1,075                                       | 81                     | -0.21                 | -2.17     | 1.85      | 0.7186      | 2.02                         | 0.87      | 3.69      | 0.7186      |
|                                | 60 and above                               | 1,227                                       | 75                     | 0.62                  | -2.09     | 3.64      | 0.0099      | 2.85                         | 1.34      | 5.01      | 0.0099      |
| Years                          | 1980-1989                                  | 457                                         | 72                     | -0.92                 | -2.94     | 1.37      | 0.1716      | 2.31                         | 1.13      | 4.26      | 0.1716      |
|                                | 1990-1999                                  | 513                                         | 75                     | -0.45                 | -2.67     | 2.07      | 0.4553      | 2.36                         | 1.27      | 4.06      | 0.4553      |
|                                | 2000-2009                                  | 1,741                                       | 79                     | 0.29                  | -1.88     | 2.53      | 0.0111      | 2.22                         | 0.98      | 3.93      | 0.0111      |
|                                | 2010-2014                                  | 716                                         | 82                     | -0.33                 | -2.44     | 2.24      | 0.4852      | 2.32                         | 1.00      | 4.47      | 0.4852      |
| Data density                   | Data poor                                  | <i>Not applicable for source-based test</i> |                        |                       |           |           |             |                              |           |           |             |
|                                | Average data density                       | 566                                         | 81                     | -0.37                 | -2.99     | 2.03      | 0.1547      | 2.45                         | 1.15      | 4.35      | 0.1547      |
|                                | Data rich                                  | 2,861                                       | 77                     | 0.00                  | -2.10     | 2.36      | 0.0369      | 2.22                         | 1.02      | 4.09      | 0.0369      |
| Hold out pattern               | Post-2000 data removed                     | 1,325                                       | 81                     | 0.56                  | -1.62     | 2.87      | 0.0001      | 2.20                         | 0.96      | 4.00      | 0.0001      |
|                                | Random set of data removed                 | 2,102                                       | 76                     | -0.47                 | -2.65     | 2.01      | 0.0889      | 2.31                         | 1.10      | 4.15      | 0.0889      |

| <b>Prevalence of raised blood pressure, Test 1, Men</b> |                                            |                                                              |                        |                                   |           |           |             |                                          |           |           |             |
|---------------------------------------------------------|--------------------------------------------|--------------------------------------------------------------|------------------------|-----------------------------------|-----------|-----------|-------------|------------------------------------------|-----------|-----------|-------------|
| <b>Data</b>                                             |                                            | <b>No. of held out observations</b>                          | <b>Percent covered</b> | <b>Error (percentage point) †</b> |           |           |             | <b>Absolute error (percentage point)</b> |           |           |             |
|                                                         |                                            |                                                              |                        | <b>Median</b>                     | <b>Q1</b> | <b>Q3</b> | <b>(p*)</b> | <b>Median</b>                            | <b>Q1</b> | <b>Q3</b> | <b>(p*)</b> |
| All                                                     |                                            | 3,318                                                        | 99                     | -0.60                             | -7.90     | 6.57      | 0.7795      | 7.19                                     | 3.38      | 13.06     | 0.7795      |
| Super-region                                            | Central and Eastern Europe                 | 219                                                          | 99                     | -2.70                             | -11.61    | 2.01      | 0.0130      | 6.09                                     | 2.55      | 12.86     | 0.0130      |
|                                                         | Central Asia, Middle East and North Africa | 502                                                          | 98                     | 1.54                              | -6.02     | 7.19      | 0.3717      | 6.75                                     | 3.13      | 11.80     | 0.3717      |
|                                                         | East and Southeast Asia                    | 164                                                          | 99                     | -0.68                             | -4.09     | 4.21      | 0.7821      | 4.13                                     | 2.39      | 8.60      | 0.7821      |
|                                                         | High-income Asia Pacific                   | <i>No data from this region were among the held-out data</i> |                        |                                   |           |           |             |                                          |           |           |             |
|                                                         | High-income Western countries              | 1,666                                                        | 99                     | -1.36                             | -8.77     | 6.12      | 0.2802      | 7.55                                     | 3.52      | 13.01     | 0.2802      |
|                                                         | Latin America and Caribbean                | 342                                                          | 99                     | 1.96                              | -5.71     | 9.84      | 0.0579      | 7.79                                     | 3.95      | 14.61     | 0.0579      |
|                                                         | Oceania                                    | 95                                                           | 93                     | 0.34                              | -7.43     | 9.64      | 0.5705      | 8.66                                     | 4.01      | 15.12     | 0.5705      |
|                                                         | South Asia                                 | 42                                                           | 100                    | -9.98                             | -16.01    | -5.11     | 0.0268      | 10.21                                    | 7.26      | 17.16     | 0.0268      |
| Sub-Saharan Africa                                      | 288                                        | 99                                                           | 0.70                   | -6.52                             | 7.51      | 0.5840    | 7.06        | 3.78                                     | 13.55     | 0.5840    |             |
| Urban or rural studies                                  | Rural                                      | 385                                                          | 97                     | -2.66                             | -11.89    | 6.15      | 0.4166      | 8.95                                     | 4.85      | 15.86     | 0.4166      |
|                                                         | Urban                                      | 1,024                                                        | 99                     | 0.49                              | -7.68     | 8.63      | 0.3872      | 8.23                                     | 3.85      | 13.97     | 0.3872      |
|                                                         | Both rural and urban                       | 1,909                                                        | 99                     | -0.72                             | -7.23     | 5.62      | 0.4675      | 6.35                                     | 2.98      | 12.05     | 0.4675      |
| Study representative-ness                               | Community                                  | 1,297                                                        | 98                     | -1.43                             | -10.35    | 7.37      | 0.3142      | 8.73                                     | 3.88      | 14.91     | 0.3142      |
|                                                         | Subnational                                | 661                                                          | 98                     | -0.39                             | -8.49     | 6.60      | 0.8816      | 7.42                                     | 3.69      | 13.88     | 0.8816      |
|                                                         | National                                   | 1,360                                                        | 99                     | -0.17                             | -6.15     | 6.05      | 0.8826      | 6.10                                     | 2.84      | 10.81     | 0.8826      |
| Age band                                                | 18-40                                      | 1,032                                                        | 97                     | -0.94                             | -6.31     | 4.42      | 0.0422      | 5.36                                     | 2.57      | 9.12      | 0.0422      |
|                                                         | 40-60                                      | 1,060                                                        | 100                    | -0.21                             | -7.70     | 7.33      | 0.7164      | 7.52                                     | 3.44      | 13.25     | 0.7164      |
|                                                         | 60 and above                               | 1,226                                                        | 99                     | -0.81                             | -9.52     | 9.18      | 0.7189      | 9.41                                     | 4.39      | 16.01     | 0.7189      |
| Years                                                   | 1980-1989                                  | 585                                                          | 99                     | 0.47                              | -8.69     | 8.59      | 0.5485      | 8.67                                     | 3.84      | 14.32     | 0.5485      |
|                                                         | 1990-1999                                  | 743                                                          | 100                    | -2.95                             | -10.58    | 5.07      | 0.0449      | 8.51                                     | 3.87      | 14.36     | 0.0449      |
|                                                         | 2000-2009                                  | 1,444                                                        | 99                     | -0.57                             | -7.21     | 6.17      | 0.6649      | 6.63                                     | 3.17      | 12.02     | 0.6649      |
|                                                         | 2010-2014                                  | 546                                                          | 97                     | 0.76                              | -4.89     | 7.16      | 0.1457      | 6.18                                     | 3.10      | 11.95     | 0.1457      |
| Data density                                            | Data poor                                  | 147                                                          | 99                     | -2.02                             | -7.30     | 4.62      | 0.4127      | 5.88                                     | 3.22      | 11.66     | 0.4127      |
|                                                         | Average data density                       | 580                                                          | 98                     | -3.33                             | -10.65    | 3.96      | 0.0171      | 7.28                                     | 3.62      | 13.47     | 0.0171      |
|                                                         | Data rich                                  | 2,591                                                        | 99                     | 0.05                              | -7.29     | 7.19      | 0.3380      | 7.23                                     | 3.32      | 13.06     | 0.3380      |

| <b>Prevalence of raised blood pressure, Test 1, Women</b> |                                            |                                     |                        |                                   |           |           |             |                                          |           |           |             |
|-----------------------------------------------------------|--------------------------------------------|-------------------------------------|------------------------|-----------------------------------|-----------|-----------|-------------|------------------------------------------|-----------|-----------|-------------|
| <b>Data</b>                                               |                                            | <b>No. of held out observations</b> | <b>Percent covered</b> | <b>Error (percentage point) †</b> |           |           |             | <b>Absolute error (percentage point)</b> |           |           |             |
|                                                           |                                            |                                     |                        | <b>Median</b>                     | <b>Q1</b> | <b>Q3</b> | <b>(p*)</b> | <b>Median</b>                            | <b>Q1</b> | <b>Q3</b> | <b>(p*)</b> |
| All                                                       |                                            | 2,720                               | 96                     | 0.91                              | -4.67     | 6.86      | 0.0147      | 5.86                                     | 2.45      | 12.04     | 0.0147      |
| Super-region                                              | Central and Eastern Europe                 | 164                                 | 100                    | 4.91                              | 0.44      | 12.95     | 0.0214      | 6.70                                     | 2.62      | 13.49     | 0.0214      |
|                                                           | Central Asia, Middle East and North Africa | 255                                 | 99                     | -0.07                             | -6.38     | 5.06      | 0.8532      | 5.76                                     | 2.41      | 12.71     | 0.8532      |
|                                                           | East and Southeast Asia                    | 477                                 | 95                     | 0.23                              | -7.60     | 5.12      | 0.9380      | 5.67                                     | 2.39      | 12.45     | 0.9380      |
|                                                           | High-income Asia Pacific                   | 120                                 | 93                     | 3.71                              | 0.99      | 13.70     | 0.0070      | 4.14                                     | 1.55      | 13.79     | 0.0070      |
|                                                           | High-income Western countries              | 873                                 | 95                     | 1.89                              | -3.84     | 7.63      | 0.0089      | 6.02                                     | 2.64      | 11.63     | 0.0089      |
|                                                           | Latin America and Caribbean                | 323                                 | 97                     | -0.18                             | -4.34     | 4.98      | 0.6287      | 4.54                                     | 2.18      | 10.19     | 0.6287      |
|                                                           | Oceania                                    | 132                                 | 94                     | -0.37                             | -4.90     | 6.97      | 0.6500      | 5.77                                     | 2.53      | 11.57     | 0.6500      |
|                                                           | South Asia                                 | 59                                  | 98                     | -4.69                             | -10.77    | 1.11      | 0.2939      | 9.26                                     | 4.68      | 13.73     | 0.2939      |
| Sub-Saharan Africa                                        | 317                                        | 99                                  | -1.01                  | -7.43                             | 5.54      | 0.7470    | 6.35        | 2.68                                     | 11.82     | 0.7470    |             |
| Urban or rural studies                                    | Rural                                      | 378                                 | 94                     | 2.40                              | -4.22     | 10.19     | 0.0587      | 7.43                                     | 3.20      | 14.38     | 0.0587      |
|                                                           | Urban                                      | 778                                 | 95                     | 1.09                              | -4.82     | 6.81      | 0.1067      | 6.01                                     | 2.70      | 12.49     | 0.1067      |
|                                                           | Both rural and urban                       | 1,564                               | 97                     | 0.63                              | -4.56     | 6.15      | 0.2738      | 5.41                                     | 2.27      | 11.19     | 0.2738      |
| Study representative-ness                                 | Community                                  | 1,071                               | 95                     | 0.20                              | -6.61     | 6.83      | 0.3207      | 6.77                                     | 2.87      | 13.77     | 0.3207      |
|                                                           | Subnational                                | 440                                 | 96                     | 2.40                              | -4.47     | 8.46      | 0.0782      | 6.37                                     | 3.22      | 12.62     | 0.0782      |
|                                                           | National                                   | 1,209                               | 98                     | 0.93                              | -3.42     | 6.25      | 0.1092      | 4.99                                     | 1.93      | 10.43     | 0.1092      |
| Age band                                                  | 18-40                                      | 909                                 | 90                     | 0.23                              | -3.48     | 2.75      | 0.5680      | 2.98                                     | 1.30      | 5.86      | 0.5680      |
|                                                           | 40-60                                      | 882                                 | 100                    | 1.43                              | -5.01     | 8.87      | 0.0015      | 6.93                                     | 3.12      | 12.89     | 0.0015      |
|                                                           | 60 and above                               | 929                                 | 99                     | 2.63                              | -6.79     | 12.16     | 0.0003      | 9.89                                     | 4.42      | 16.28     | 0.0003      |
| Years                                                     | 1980-1989                                  | 454                                 | 91                     | 2.94                              | -4.48     | 8.44      | 0.0060      | 6.60                                     | 3.44      | 13.01     | 0.0060      |
|                                                           | 1990-1999                                  | 609                                 | 99                     | 1.36                              | -4.41     | 7.33      | 0.1573      | 6.07                                     | 2.64      | 12.55     | 0.1573      |
|                                                           | 2000-2009                                  | 1,181                               | 97                     | 0.86                              | -4.21     | 6.62      | 0.2002      | 5.42                                     | 2.22      | 12.06     | 0.2002      |
|                                                           | 2010-2014                                  | 476                                 | 97                     | -0.40                             | -6.28     | 4.35      | 0.8006      | 5.54                                     | 2.02      | 10.48     | 0.8006      |
| Data density                                              | Data poor                                  | 152                                 | 98                     | -2.19                             | -7.63     | 3.05      | 0.3532      | 6.61                                     | 2.85      | 10.23     | 0.3532      |
|                                                           | Average data density                       | 547                                 | 98                     | -1.45                             | -7.31     | 4.21      | 0.4059      | 6.11                                     | 2.54      | 12.25     | 0.4059      |
|                                                           | Data rich                                  | 2,021                               | 96                     | 1.54                              | -3.52     | 7.60      | 0.0006      | 5.80                                     | 2.42      | 12.06     | 0.0006      |

| <b>Prevalence of raised blood pressure, Test 2, Men</b> |                                            |                                             |                        |                                   |           |           |             |                                          |           |           |             |
|---------------------------------------------------------|--------------------------------------------|---------------------------------------------|------------------------|-----------------------------------|-----------|-----------|-------------|------------------------------------------|-----------|-----------|-------------|
| <b>Data</b>                                             |                                            | <b>No. of held out observations</b>         | <b>Percent covered</b> | <b>Error (percentage point) †</b> |           |           |             | <b>Absolute error (percentage point)</b> |           |           |             |
|                                                         |                                            |                                             |                        | <b>Median</b>                     | <b>Q1</b> | <b>Q3</b> | <b>(p*)</b> | <b>Median</b>                            | <b>Q1</b> | <b>Q3</b> | <b>(p*)</b> |
| All                                                     |                                            | 3,514                                       | 98                     | 0.43                              | -5.57     | 7.50      | 0.0061      | 6.53                                     | 2.92      | 12.17     | 0.0061      |
| Super-region                                            | Central and Eastern Europe                 | 369                                         | 99                     | -0.26                             | -6.50     | 8.16      | 0.6630      | 7.12                                     | 3.65      | 14.65     | 0.6630      |
|                                                         | Central Asia, Middle East and North Africa | 442                                         | 98                     | 1.82                              | -5.66     | 7.26      | 0.2945      | 6.70                                     | 3.57      | 11.83     | 0.2945      |
|                                                         | East and Southeast Asia                    | 352                                         | 97                     | -0.97                             | -6.91     | 5.19      | 0.6454      | 6.27                                     | 2.83      | 11.44     | 0.6454      |
|                                                         | High-income Asia Pacific                   | 362                                         | 98                     | 0.79                              | -4.28     | 10.10     | 0.0147      | 5.87                                     | 2.70      | 13.33     | 0.0147      |
|                                                         | High-income Western countries              | 1,127                                       | 99                     | 0.43                              | -5.81     | 7.21      | 0.1872      | 6.41                                     | 2.81      | 11.38     | 0.1872      |
|                                                         | Latin America and Caribbean                | 282                                         | 99                     | 1.80                              | -4.90     | 9.13      | 0.1540      | 6.85                                     | 2.88      | 13.17     | 0.1540      |
|                                                         | Oceania                                    | 108                                         | 93                     | -1.65                             | -7.34     | 6.84      | 0.8421      | 7.01                                     | 3.60      | 12.28     | 0.8421      |
|                                                         | South Asia                                 | 192                                         | 98                     | -0.41                             | -5.09     | 5.76      | 0.7472      | 5.33                                     | 2.38      | 9.50      | 0.7472      |
|                                                         | Sub-Saharan Africa                         | 280                                         | 99                     | 1.69                              | -3.91     | 8.82      | 0.1318      | 7.11                                     | 2.97      | 13.98     | 0.1318      |
| Urban or rural studies                                  | Rural                                      | 509                                         | 96                     | 1.52                              | -7.03     | 9.29      | 0.1221      | 8.44                                     | 3.88      | 14.77     | 0.1221      |
|                                                         | Urban                                      | 898                                         | 98                     | 0.54                              | -6.35     | 8.18      | 0.2495      | 7.44                                     | 3.32      | 12.80     | 0.2495      |
|                                                         | Both rural and urban                       | 2,107                                       | 99                     | 0.24                              | -5.06     | 6.70      | 0.0609      | 5.87                                     | 2.66      | 11.27     | 0.0609      |
| Study representative-ness                               | Community                                  | 1,348                                       | 97                     | 0.26                              | -7.41     | 8.17      | 0.3631      | 7.85                                     | 3.49      | 13.85     | 0.3631      |
|                                                         | Subnational                                | 551                                         | 97                     | 0.96                              | -6.41     | 8.18      | 0.0985      | 7.09                                     | 3.53      | 12.69     | 0.0985      |
|                                                         | National                                   | 1,615                                       | 99                     | 0.37                              | -4.49     | 6.71      | 0.0546      | 5.43                                     | 2.44      | 10.31     | 0.0546      |
| Age band                                                | 18-40                                      | 1,130                                       | 96                     | 0.00                              | -4.48     | 4.65      | 0.6376      | 4.58                                     | 2.01      | 7.90      | 0.6376      |
|                                                         | 40-60                                      | 1,103                                       | 100                    | 0.21                              | -6.07     | 7.56      | 0.1083      | 6.92                                     | 3.10      | 12.74     | 0.1083      |
|                                                         | 60 and above                               | 1,281                                       | 99                     | 1.41                              | -6.65     | 11.60     | 0.0000      | 9.14                                     | 4.26      | 15.51     | 0.0000      |
| Years                                                   | 1980-1989                                  | 558                                         | 98                     | -1.09                             | -6.81     | 7.41      | 0.6957      | 7.05                                     | 3.10      | 12.58     | 0.6957      |
|                                                         | 1990-1999                                  | 443                                         | 99                     | 0.78                              | -7.53     | 7.54      | 0.6546      | 7.57                                     | 3.69      | 12.34     | 0.6546      |
|                                                         | 2000-2009                                  | 1,786                                       | 98                     | 0.29                              | -5.46     | 7.12      | 0.1883      | 6.33                                     | 2.78      | 12.10     | 0.1883      |
|                                                         | 2010-2014                                  | 727                                         | 98                     | 1.82                              | -3.88     | 8.74      | 0.0021      | 6.25                                     | 2.76      | 12.12     | 0.0021      |
| Data density                                            | Data poor                                  | <i>Not applicable for source-based test</i> |                        |                                   |           |           |             |                                          |           |           |             |
|                                                         | Average data density                       | 545                                         | 98                     | -1.48                             | -8.52     | 5.35      | 0.3163      | 6.86                                     | 3.15      | 12.14     | 0.3163      |
|                                                         | Data rich                                  | 2,969                                       | 98                     | 0.86                              | -5.12     | 7.83      | 0.0007      | 6.48                                     | 2.90      | 12.18     | 0.0007      |
| Hold out pattern                                        | Post-2000 data removed                     | 1,414                                       | 99                     | 1.45                              | -4.01     | 8.50      | 0.0003      | 6.31                                     | 2.76      | 12.12     | 0.0003      |
|                                                         | Random set of data removed                 | 2,100                                       | 98                     | -0.28                             | -6.57     | 6.86      | 0.5604      | 6.73                                     | 3.10      | 12.26     | 0.5604      |

| <b>Prevalence of raised blood pressure, Test 2, Women</b> |                                            |                                             |                        |                                   |           |           |             |                                          |           |           |             |
|-----------------------------------------------------------|--------------------------------------------|---------------------------------------------|------------------------|-----------------------------------|-----------|-----------|-------------|------------------------------------------|-----------|-----------|-------------|
| <b>Data</b>                                               |                                            | <b>No. of held out observations</b>         | <b>Percent covered</b> | <b>Error (percentage point) †</b> |           |           |             | <b>Absolute error (percentage point)</b> |           |           |             |
|                                                           |                                            |                                             |                        | <b>Median</b>                     | <b>Q1</b> | <b>Q3</b> | <b>(p*)</b> | <b>Median</b>                            | <b>Q1</b> | <b>Q3</b> | <b>(p*)</b> |
| All                                                       |                                            | 3,435                                       | 96                     | 0.07                              | -5.26     | 4.98      | 0.3235      | 5.10                                     | 1.98      | 10.80     | 0.3235      |
| Super-region                                              | Central and Eastern Europe                 | 283                                         | 98                     | -0.74                             | -7.10     | 3.33      | 0.3206      | 4.99                                     | 2.49      | 9.75      | 0.3206      |
|                                                           | Central Asia, Middle East and North Africa | 423                                         | 99                     | 1.70                              | -3.01     | 7.09      | 0.0444      | 5.62                                     | 2.32      | 10.97     | 0.0444      |
|                                                           | East and Southeast Asia                    | 342                                         | 96                     | -0.10                             | -6.81     | 5.43      | 0.9406      | 6.27                                     | 2.61      | 11.92     | 0.9406      |
|                                                           | High-income Asia Pacific                   | 370                                         | 92                     | 0.50                              | -5.43     | 5.79      | 0.3386      | 5.48                                     | 1.52      | 11.81     | 0.3386      |
|                                                           | High-income Western countries              | 1,136                                       | 95                     | -0.23                             | -5.13     | 3.89      | 0.8488      | 4.55                                     | 1.76      | 10.06     | 0.8488      |
|                                                           | Latin America and Caribbean                | 310                                         | 97                     | -0.17                             | -3.90     | 3.86      | 0.6683      | 3.89                                     | 1.72      | 10.06     | 0.6683      |
|                                                           | Oceania                                    | 111                                         | 91                     | -1.35                             | -6.78     | 4.11      | 0.8953      | 5.44                                     | 2.45      | 13.52     | 0.8953      |
|                                                           | South Asia                                 | 194                                         | 98                     | 0.91                              | -3.11     | 7.75      | 0.3078      | 4.53                                     | 1.59      | 10.73     | 0.3078      |
| Sub-Saharan Africa                                        | 266                                        | 99                                          | -0.84                  | -7.46                             | 5.96      | 0.9073    | 6.61        | 2.50                                     | 11.77     | 0.9073    |             |
| Urban or rural studies                                    | Rural                                      | 512                                         | 93                     | 0.24                              | -7.00     | 5.71      | 0.5921      | 6.11                                     | 2.39      | 13.09     | 0.5921      |
|                                                           | Urban                                      | 894                                         | 97                     | -0.76                             | -7.13     | 3.93      | 0.5264      | 5.65                                     | 2.41      | 11.96     | 0.5264      |
|                                                           | Both rural and urban                       | 2,029                                       | 97                     | 0.23                              | -4.16     | 5.24      | 0.2031      | 4.70                                     | 1.72      | 10.01     | 0.2031      |
| Study representative-ness                                 | Community                                  | 1,360                                       | 95                     | -0.66                             | -7.99     | 4.67      | 0.8049      | 6.35                                     | 2.50      | 13.07     | 0.8049      |
|                                                           | Subnational                                | 490                                         | 95                     | 0.19                              | -5.02     | 3.59      | 0.9911      | 4.24                                     | 2.00      | 9.70      | 0.9911      |
|                                                           | National                                   | 1,585                                       | 97                     | 0.36                              | -3.58     | 5.52      | 0.1424      | 4.49                                     | 1.59      | 9.68      | 0.1424      |
| Age band                                                  | 18-40                                      | 1,126                                       | 90                     | -0.24                             | -3.06     | 1.74      | 0.1434      | 2.20                                     | 0.99      | 4.40      | 0.1434      |
|                                                           | 40-60                                      | 1,075                                       | 100                    | -0.22                             | -6.40     | 5.91      | 0.9027      | 6.14                                     | 2.55      | 10.66     | 0.9027      |
|                                                           | 60 and above                               | 1,234                                       | 99                     | 1.78                              | -7.64     | 11.45     | 0.0004      | 9.67                                     | 4.23      | 15.39     | 0.0004      |
| Years                                                     | 1980-1989                                  | 458                                         | 95                     | -3.37                             | -10.26    | 2.30      | 0.0715      | 6.57                                     | 2.58      | 12.56     | 0.0715      |
|                                                           | 1990-1999                                  | 513                                         | 97                     | -0.18                             | -7.43     | 5.64      | 0.7460      | 6.10                                     | 2.43      | 11.64     | 0.7460      |
|                                                           | 2000-2009                                  | 1,745                                       | 97                     | 0.71                              | -3.88     | 5.97      | 0.0365      | 4.70                                     | 1.86      | 10.59     | 0.0365      |
|                                                           | 2010-2014                                  | 719                                         | 95                     | -0.02                             | -4.37     | 4.85      | 0.5867      | 4.49                                     | 1.70      | 9.97      | 0.5867      |
| Data density                                              | Data poor                                  | <i>Not applicable for source-based test</i> |                        |                                   |           |           |             |                                          |           |           |             |
|                                                           | Average data density                       | 568                                         | 97                     | -0.49                             | -6.69     | 4.57      | 0.7481      | 5.99                                     | 2.39      | 11.12     | 0.7481      |
|                                                           | Data rich                                  | 2,867                                       | 96                     | 0.14                              | -4.96     | 5.06      | 0.2342      | 5.00                                     | 1.92      | 10.72     | 0.2342      |
| Hold out pattern                                          | Post-2000 data removed                     | 1,329                                       | 96                     | 1.06                              | -2.51     | 6.65      | 0.0043      | 4.27                                     | 1.67      | 10.06     | 0.0043      |
|                                                           | Random set of data removed                 | 2,106                                       | 96                     | -0.91                             | -7.28     | 3.89      | 0.2895      | 5.70                                     | 2.29      | 11.09     | 0.2895      |

† Estimated values minus held out values.

\* p-values for model error comparisons were calculated using the non-parametric Wilcoxon signed-rank test for paired data. The p-values are calculated assuming independence of the held-out observations. They should therefore be interpreted as an approximation because there is some dependence among the held-out observations, within each of the five repetitions for example.

**Appendix Table 5:** Mean systolic blood pressure, mean diastolic blood pressure and prevalence of raised blood pressure by sex and age group for the world and nine super-regions in 1975, 1985, 1995, 2005 and 2015. Numbers in brackets show 95% credible intervals.

MENA: Middle East and North Africa



| Mean systolic blood pressure (mmHg) |                     |                     |                     |                     |                     |
|-------------------------------------|---------------------|---------------------|---------------------|---------------------|---------------------|
| Super-region (Men)                  | Year                |                     |                     |                     |                     |
|                                     | 1975                | 1985                | 1995                | 2005                | 2015                |
| <b>18-19 years</b>                  |                     |                     |                     |                     |                     |
| World                               | 117.6 (115.4-119.9) | 117.4 (116.2-118.5) | 117.7 (117.0-118.5) | 118.2 (117.6-118.7) | 118.9 (117.9-120.0) |
| Central & Eastern Europe            | 122.3 (118.9-125.8) | 122.3 (120.6-124.0) | 121.5 (120.0-123.0) | 121.3 (119.6-122.8) | 121.9 (119.5-124.4) |
| Central Asia & MENA                 | 117.9 (112.9-122.6) | 117.9 (115.2-120.4) | 117.6 (116.0-119.1) | 117.8 (116.5-119.1) | 118.3 (116.3-120.3) |
| East & Southeast Asia               | 113.9 (110.2-117.6) | 114.3 (112.8-115.8) | 115.1 (113.9-116.2) | 116.0 (115.0-116.9) | 117.3 (115.2-119.4) |
| High-income Asia Pacific            | 121.0 (118.3-123.8) | 119.3 (117.8-120.8) | 117.9 (116.7-119.1) | 116.2 (115.2-117.2) | 114.3 (112.3-116.3) |
| High-income western                 | 124.0 (122.0-126.0) | 122.6 (121.5-123.6) | 120.5 (119.7-121.4) | 119.3 (118.5-120.2) | 118.3 (116.6-120.0) |
| Latin America & Caribbean           | 120.5 (116.1-124.7) | 120.3 (118.0-122.6) | 119.6 (118.1-121.0) | 119.4 (118.3-120.4) | 120.3 (118.4-122.3) |
| Oceania                             | 119.2 (114.1-124.0) | 120.3 (117.6-123.1) | 121.4 (118.2-124.6) | 122.4 (119.3-125.5) | 123.7 (118.6-128.6) |
| South Asia                          | 116.0 (109.9-121.7) | 116.8 (113.6-119.7) | 117.7 (115.7-119.5) | 119.1 (117.8-120.5) | 119.8 (117.5-122.1) |
| Sub-Saharan Africa                  | 117.9 (114.5-121.7) | 118.8 (116.9-120.8) | 119.3 (117.8-120.7) | 119.6 (118.4-120.9) | 119.6 (117.6-121.5) |
| <b>20-24 years</b>                  |                     |                     |                     |                     |                     |
| World                               | 118.7 (116.4-121.0) | 118.7 (117.5-119.8) | 118.6 (117.9-119.3) | 119.3 (118.8-119.9) | 119.9 (118.9-121.0) |
| Central & Eastern Europe            | 123.9 (120.6-127.4) | 124.1 (122.5-125.7) | 123.2 (121.8-124.5) | 122.9 (121.4-124.4) | 123.4 (121.0-125.9) |
| Central Asia & MENA                 | 118.8 (113.7-123.6) | 118.9 (116.2-121.4) | 118.6 (117.1-120.1) | 118.7 (117.5-119.8) | 119.3 (117.4-121.2) |
| East & Southeast Asia               | 114.7 (110.9-118.6) | 115.2 (113.7-116.7) | 115.9 (114.8-117.0) | 117.0 (116.1-117.9) | 118.3 (116.1-120.6) |
| High-income Asia Pacific            | 123.3 (120.9-125.8) | 120.8 (119.3-122.3) | 119.4 (118.2-120.6) | 117.7 (116.7-118.6) | 115.6 (113.6-117.6) |
| High-income western                 | 125.0 (123.0-127.0) | 123.4 (122.4-124.4) | 121.7 (120.9-122.4) | 120.2 (119.4-121.0) | 119.1 (117.4-120.8) |
| Latin America & Caribbean           | 121.7 (117.3-126.0) | 121.6 (119.3-123.9) | 120.7 (119.4-122.1) | 120.6 (119.6-121.7) | 121.4 (119.5-123.4) |
| Oceania                             | 119.3 (114.2-124.1) | 120.5 (117.9-123.0) | 121.5 (118.5-124.5) | 122.6 (119.6-125.5) | 123.9 (118.8-128.7) |
| South Asia                          | 116.9 (110.7-122.9) | 117.7 (114.6-120.7) | 118.7 (116.8-120.5) | 120.1 (118.8-121.5) | 120.9 (118.5-123.2) |
| Sub-Saharan Africa                  | 119.3 (115.8-123.1) | 120.2 (118.2-122.2) | 120.6 (119.1-122.0) | 121.0 (119.8-122.1) | 120.9 (119.0-122.8) |
| <b>25-29 years</b>                  |                     |                     |                     |                     |                     |
| World                               | 120.3 (118.1-122.6) | 120.0 (118.9-121.2) | 119.8 (119.1-120.5) | 120.6 (120.0-121.1) | 121.1 (120.0-122.2) |
| Central & Eastern Europe            | 125.9 (122.5-129.4) | 125.9 (124.4-127.5) | 125.0 (123.7-126.3) | 124.8 (123.4-126.2) | 125.2 (122.6-127.8) |
| Central Asia & MENA                 | 119.9 (114.7-124.7) | 120.1 (117.4-122.6) | 119.8 (118.3-121.2) | 119.8 (118.7-120.8) | 120.4 (118.6-122.2) |
| East & Southeast Asia               | 115.8 (112.0-119.8) | 116.4 (114.8-117.9) | 117.0 (115.9-118.1) | 118.2 (117.3-119.1) | 119.5 (117.1-121.9) |
| High-income Asia Pacific            | 125.7 (123.5-128.1) | 122.5 (121.0-124.0) | 121.1 (119.9-122.3) | 119.3 (118.4-120.3) | 117.4 (115.3-119.5) |
| High-income western                 | 126.0 (124.0-128.1) | 124.2 (123.1-125.3) | 122.9 (122.1-123.6) | 121.2 (120.5-122.0) | 120.0 (118.2-121.6) |
| Latin America & Caribbean           | 123.1 (118.6-127.5) | 122.9 (120.6-125.3) | 122.1 (120.7-123.4) | 121.9 (120.9-122.9) | 122.8 (120.9-124.8) |
| Oceania                             | 119.1 (113.9-124.1) | 120.4 (118.0-122.9) | 121.5 (118.7-124.4) | 122.5 (119.7-125.4) | 123.9 (118.8-128.9) |
| South Asia                          | 117.8 (111.5-123.8) | 118.7 (115.6-121.8) | 119.7 (117.8-121.5) | 121.1 (119.9-122.5) | 121.9 (119.5-124.3) |
| Sub-Saharan Africa                  | 120.8 (117.2-124.7) | 121.7 (119.8-123.8) | 122.2 (120.7-123.6) | 122.5 (121.4-123.7) | 122.4 (120.5-124.3) |
| <b>30-34 years</b>                  |                     |                     |                     |                     |                     |
| World                               | 121.4 (119.1-123.8) | 121.1 (119.9-122.3) | 121.0 (120.3-121.7) | 121.4 (120.9-122.0) | 122.2 (121.1-123.2) |
| Central & Eastern Europe            | 127.6 (124.2-131.1) | 127.6 (126.0-129.2) | 126.7 (125.2-128.0) | 126.5 (125.0-127.9) | 126.9 (124.3-129.5) |
| Central Asia & MENA                 | 120.9 (115.6-125.9) | 121.3 (118.5-123.7) | 121.0 (119.6-122.4) | 121.0 (119.9-122.0) | 121.3 (119.5-123.2) |
| East & Southeast Asia               | 117.0 (113.0-121.0) | 117.4 (115.8-118.9) | 118.1 (117.0-119.2) | 119.2 (118.3-120.2) | 120.8 (118.4-123.2) |
| High-income Asia Pacific            | 127.3 (124.9-129.7) | 124.4 (123.0-125.8) | 122.4 (121.2-123.7) | 120.8 (119.7-121.8) | 118.7 (116.6-120.8) |
| High-income western                 | 127.1 (125.0-129.2) | 125.1 (124.0-126.2) | 123.5 (122.7-124.3) | 122.2 (121.4-122.9) | 120.7 (119.0-122.4) |
| Latin America & Caribbean           | 124.3 (119.6-128.8) | 124.1 (121.7-126.5) | 123.3 (121.9-124.7) | 123.0 (122.0-124.0) | 124.2 (122.2-126.3) |
| Oceania                             | 119.0 (113.6-124.1) | 120.4 (117.9-122.9) | 121.6 (118.8-124.4) | 122.5 (119.7-125.4) | 123.9 (118.8-129.0) |
| South Asia                          | 118.5 (112.1-124.7) | 119.5 (116.3-122.7) | 120.5 (118.5-122.3) | 122.0 (120.6-123.2) | 122.7 (120.2-125.1) |
| Sub-Saharan Africa                  | 122.2 (118.4-126.2) | 123.1 (121.1-125.2) | 123.6 (122.2-125.0) | 123.9 (122.7-125.0) | 123.7 (121.8-125.6) |
| <b>35-39 years</b>                  |                     |                     |                     |                     |                     |
| World                               | 122.9 (120.5-125.3) | 122.7 (121.5-123.8) | 122.4 (121.7-123.1) | 122.6 (122.0-123.2) | 123.4 (122.3-124.5) |

| Mean systolic blood pressure (mmHg) |                     |                     |                     |                     |                     |
|-------------------------------------|---------------------|---------------------|---------------------|---------------------|---------------------|
| Super-region (Men)                  | Year                |                     |                     |                     |                     |
|                                     | 1975                | 1985                | 1995                | 2005                | 2015                |
| Central & Eastern Europe            | 129.3 (125.6-133.2) | 129.4 (127.9-131.0) | 128.5 (127.1-129.8) | 128.3 (126.8-129.7) | 128.8 (126.2-131.4) |
| Central Asia & MENA                 | 122.6 (117.2-127.6) | 122.6 (119.9-125.2) | 122.4 (120.9-123.8) | 122.3 (121.3-123.4) | 122.6 (120.7-124.5) |
| East & Southeast Asia               | 118.3 (114.2-122.5) | 118.8 (117.2-120.4) | 119.6 (118.4-120.7) | 120.6 (119.6-121.6) | 122.3 (119.8-124.7) |
| High-income Asia Pacific            | 128.9 (126.4-131.4) | 126.3 (125.0-127.7) | 123.9 (122.6-125.2) | 122.1 (121.1-123.1) | 120.2 (118.0-122.4) |
| High-income western                 | 128.4 (126.3-130.7) | 126.4 (125.2-127.4) | 124.3 (123.5-125.1) | 123.3 (122.6-124.1) | 121.8 (120.0-123.5) |
| Latin America & Caribbean           | 125.7 (120.9-130.4) | 125.5 (123.0-128.0) | 124.6 (123.2-126.1) | 124.3 (123.3-125.4) | 125.4 (123.4-127.6) |
| Oceania                             | 119.2 (113.7-124.5) | 120.6 (118.0-123.2) | 121.9 (119.0-124.8) | 122.9 (120.2-125.7) | 124.2 (118.9-129.5) |
| South Asia                          | 119.3 (112.7-125.7) | 120.3 (116.9-123.5) | 121.4 (119.4-123.2) | 122.8 (121.5-124.1) | 123.6 (121.0-126.1) |
| Sub-Saharan Africa                  | 123.7 (119.8-127.9) | 124.6 (122.5-126.8) | 125.2 (123.6-126.6) | 125.4 (124.2-126.6) | 125.2 (123.3-127.2) |
| <b>40-44 years</b>                  |                     |                     |                     |                     |                     |
| World                               | 124.6 (122.1-127.2) | 124.4 (123.2-125.7) | 124.1 (123.4-124.9) | 124.4 (123.8-125.0) | 125.0 (123.8-126.3) |
| Central & Eastern Europe            | 131.7 (128.0-135.6) | 131.9 (130.2-133.6) | 130.8 (129.3-132.2) | 130.4 (128.8-132.0) | 131.1 (128.4-133.8) |
| Central Asia & MENA                 | 124.2 (118.5-129.6) | 124.5 (121.6-127.1) | 124.3 (122.8-125.8) | 124.4 (123.3-125.4) | 124.5 (122.5-126.4) |
| East & Southeast Asia               | 120.1 (115.8-124.5) | 120.7 (119.0-122.4) | 121.3 (120.2-122.5) | 122.6 (121.5-123.6) | 124.2 (121.5-126.9) |
| High-income Asia Pacific            | 131.4 (128.9-134.0) | 128.4 (127.0-129.8) | 126.1 (124.9-127.4) | 123.8 (122.8-124.9) | 122.0 (119.7-124.3) |
| High-income western                 | 130.1 (127.8-132.4) | 128.3 (127.2-129.4) | 126.0 (125.1-126.8) | 124.7 (123.9-125.5) | 123.3 (121.5-125.1) |
| Latin America & Caribbean           | 127.5 (122.5-132.4) | 127.3 (124.7-129.9) | 126.4 (124.9-127.9) | 126.2 (125.1-127.3) | 127.2 (125.1-129.4) |
| Oceania                             | 119.9 (114.2-125.5) | 121.3 (118.6-124.0) | 122.7 (119.7-125.8) | 123.9 (121.0-126.8) | 125.1 (119.5-130.7) |
| South Asia                          | 120.5 (113.4-127.2) | 121.4 (117.9-124.8) | 122.6 (120.5-124.6) | 124.1 (122.7-125.5) | 124.9 (122.2-127.5) |
| Sub-Saharan Africa                  | 125.6 (121.6-130.0) | 126.7 (124.5-128.9) | 127.2 (125.6-128.7) | 127.5 (126.2-128.7) | 127.2 (125.1-129.2) |
| <b>45-49 years</b>                  |                     |                     |                     |                     |                     |
| World                               | 127.5 (124.9-130.2) | 127.3 (126.0-128.6) | 126.9 (126.1-127.7) | 127.1 (126.4-127.7) | 127.5 (126.2-128.9) |
| Central & Eastern Europe            | 134.9 (130.8-139.1) | 135.0 (133.1-136.8) | 134.0 (132.4-135.4) | 133.6 (131.9-135.3) | 134.4 (131.5-137.2) |
| Central Asia & MENA                 | 127.2 (121.1-132.9) | 127.4 (124.3-130.3) | 127.0 (125.4-128.6) | 127.1 (126.0-128.3) | 127.3 (125.3-129.4) |
| East & Southeast Asia               | 122.7 (118.1-127.4) | 123.3 (121.5-125.1) | 124.0 (122.8-125.3) | 125.3 (124.3-126.4) | 127.1 (124.1-129.9) |
| High-income Asia Pacific            | 134.7 (132.1-137.4) | 131.2 (129.6-132.7) | 129.0 (127.7-130.3) | 126.3 (125.2-127.5) | 124.1 (121.7-126.6) |
| High-income western                 | 132.7 (130.3-135.2) | 131.3 (130.1-132.5) | 128.6 (127.7-129.5) | 126.8 (125.9-127.7) | 125.6 (123.7-127.5) |
| Latin America & Caribbean           | 130.3 (124.8-135.5) | 130.0 (127.2-132.8) | 129.0 (127.4-130.6) | 128.8 (127.6-130.0) | 129.8 (127.6-132.2) |
| Oceania                             | 121.3 (115.2-127.4) | 122.8 (119.8-125.7) | 124.3 (121.0-127.6) | 125.6 (122.6-128.7) | 127.0 (121.2-132.7) |
| South Asia                          | 122.2 (114.7-129.5) | 123.3 (119.4-126.9) | 124.5 (122.3-126.5) | 126.2 (124.7-127.7) | 127.0 (124.0-129.8) |
| Sub-Saharan Africa                  | 128.3 (123.9-133.0) | 129.4 (127.0-131.9) | 129.9 (128.2-131.6) | 130.3 (128.9-131.6) | 130.0 (127.8-132.1) |
| <b>50-54 years</b>                  |                     |                     |                     |                     |                     |
| World                               | 130.7 (127.9-133.5) | 130.4 (129.0-131.8) | 130.0 (129.2-130.9) | 130.2 (129.5-130.9) | 130.8 (129.4-132.3) |
| Central & Eastern Europe            | 139.0 (134.8-143.4) | 139.0 (137.0-140.9) | 138.0 (136.3-139.6) | 137.5 (135.7-139.3) | 138.0 (134.8-141.3) |
| Central Asia & MENA                 | 130.5 (123.8-136.8) | 130.7 (127.3-133.9) | 130.4 (128.7-132.2) | 130.6 (129.3-131.8) | 131.0 (128.7-133.2) |
| East & Southeast Asia               | 125.9 (120.8-131.0) | 126.5 (124.5-128.4) | 127.4 (126.0-128.8) | 128.7 (127.4-129.9) | 130.6 (127.4-133.8) |
| High-income Asia Pacific            | 138.1 (135.1-141.1) | 134.9 (133.2-136.5) | 132.3 (130.9-133.7) | 129.8 (128.5-131.1) | 126.8 (124.2-129.4) |
| High-income western                 | 136.2 (133.5-138.9) | 134.5 (133.2-135.8) | 132.2 (131.2-133.2) | 129.9 (128.9-130.8) | 128.4 (126.2-130.4) |
| Latin America & Caribbean           | 133.6 (127.7-139.3) | 133.2 (130.2-136.2) | 132.2 (130.4-133.9) | 131.9 (130.7-133.2) | 133.2 (130.8-135.9) |
| Oceania                             | 123.4 (116.6-129.9) | 124.9 (121.6-128.2) | 126.5 (122.9-130.2) | 127.9 (124.6-131.4) | 129.6 (123.5-135.6) |
| South Asia                          | 124.5 (116.3-132.4) | 125.6 (121.5-129.6) | 126.9 (124.5-129.2) | 128.9 (127.3-130.5) | 129.7 (126.5-132.8) |
| Sub-Saharan Africa                  | 131.6 (126.8-136.7) | 132.7 (130.2-135.4) | 133.4 (131.5-135.2) | 133.7 (132.3-135.2) | 133.4 (131.1-135.8) |
| <b>55-59 years</b>                  |                     |                     |                     |                     |                     |
| World                               | 133.5 (130.4-136.7) | 134.1 (132.6-135.6) | 133.7 (132.8-134.6) | 133.7 (133.0-134.4) | 134.2 (132.7-135.8) |
| Central & Eastern Europe            | 143.0 (138.3-147.8) | 143.0 (140.8-145.2) | 141.7 (139.8-143.6) | 141.4 (139.5-143.3) | 142.0 (138.6-145.5) |
| Central Asia & MENA                 | 134.2 (126.9-141.1) | 134.6 (130.8-138.0) | 134.3 (132.3-136.2) | 134.2 (132.9-135.6) | 134.6 (132.2-137.0) |

| Mean systolic blood pressure (mmHg) |                     |                     |                     |                     |                     |
|-------------------------------------|---------------------|---------------------|---------------------|---------------------|---------------------|
| Super-region (Men)                  | Year                |                     |                     |                     |                     |
|                                     | 1975                | 1985                | 1995                | 2005                | 2015                |
| East & Southeast Asia               | 129.2 (123.6-134.7) | 129.8 (127.7-132.0) | 130.8 (129.4-132.3) | 132.3 (131.0-133.6) | 134.3 (130.9-137.7) |
| High-income Asia Pacific            | 141.9 (138.7-145.2) | 138.7 (136.9-140.4) | 135.6 (134.0-137.1) | 133.2 (131.7-134.6) | 129.7 (126.9-132.6) |
| High-income western                 | 139.4 (136.6-142.3) | 137.9 (136.5-139.3) | 136.0 (135.0-137.1) | 133.3 (132.3-134.3) | 131.3 (128.9-133.6) |
| Latin America & Caribbean           | 137.1 (130.6-143.2) | 136.7 (133.4-140.0) | 135.5 (133.6-137.5) | 135.2 (133.8-136.6) | 136.6 (134.0-139.5) |
| Oceania                             | 125.7 (118.3-132.7) | 127.3 (123.6-130.8) | 128.8 (124.9-133.0) | 130.4 (126.7-134.3) | 132.4 (125.9-138.8) |
| South Asia                          | 126.9 (118.1-135.5) | 128.2 (123.7-132.5) | 129.5 (127.0-132.0) | 131.6 (129.9-133.3) | 132.7 (129.2-136.0) |
| Sub-Saharan Africa                  | 134.9 (129.8-140.5) | 136.2 (133.4-139.1) | 136.9 (134.9-138.9) | 137.3 (135.7-138.8) | 136.9 (134.4-139.5) |
| <b>60-64 years</b>                  |                     |                     |                     |                     |                     |
| World                               | 137.5 (134.3-140.7) | 136.9 (135.3-138.5) | 136.5 (135.6-137.5) | 136.6 (135.8-137.3) | 137.2 (135.5-139.0) |
| Central & Eastern Europe            | 146.4 (141.5-151.6) | 146.6 (144.3-148.9) | 145.1 (143.2-147.0) | 145.0 (143.0-146.9) | 145.5 (141.9-149.2) |
| Central Asia & MENA                 | 137.4 (129.7-144.6) | 137.7 (133.7-141.3) | 137.3 (135.3-139.4) | 137.4 (136.0-138.8) | 137.8 (135.1-140.4) |
| East & Southeast Asia               | 132.1 (126.3-138.1) | 132.8 (130.6-135.1) | 133.9 (132.2-135.5) | 135.4 (134.0-136.8) | 137.6 (133.7-141.4) |
| High-income Asia Pacific            | 145.6 (142.4-149.0) | 141.5 (139.6-143.3) | 138.6 (136.9-140.2) | 135.8 (134.3-137.4) | 133.1 (129.9-136.3) |
| High-income western                 | 143.2 (140.1-146.4) | 140.9 (139.4-142.4) | 138.9 (137.8-140.0) | 136.4 (135.4-137.5) | 134.1 (131.5-136.5) |
| Latin America & Caribbean           | 140.1 (133.2-146.6) | 139.6 (136.1-143.0) | 138.3 (136.2-140.3) | 137.9 (136.4-139.4) | 139.4 (136.6-142.5) |
| Oceania                             | 127.7 (119.9-135.2) | 129.3 (125.3-133.2) | 131.0 (126.8-135.5) | 132.6 (128.6-136.8) | 134.7 (127.7-141.5) |
| South Asia                          | 129.0 (119.7-138.2) | 130.4 (125.6-135.0) | 131.9 (129.1-134.5) | 134.0 (132.2-135.9) | 135.3 (131.5-138.9) |
| Sub-Saharan Africa                  | 137.8 (132.3-143.7) | 139.1 (136.1-142.2) | 139.8 (137.7-142.0) | 140.3 (138.6-142.0) | 140.0 (137.2-142.8) |
| <b>65-69 years</b>                  |                     |                     |                     |                     |                     |
| World                               | 140.2 (137.0-143.5) | 138.7 (137.0-140.3) | 139.0 (138.0-140.0) | 139.1 (138.3-139.9) | 139.4 (137.7-141.1) |
| Central & Eastern Europe            | 149.0 (143.9-154.3) | 149.0 (146.5-151.5) | 147.6 (145.4-149.7) | 147.2 (144.8-149.4) | 148.0 (144.3-151.6) |
| Central Asia & MENA                 | 140.1 (132.1-147.7) | 140.3 (136.1-144.2) | 140.0 (137.8-142.3) | 140.1 (138.5-141.6) | 140.3 (137.6-143.1) |
| East & Southeast Asia               | 134.5 (128.3-140.7) | 135.2 (132.8-137.6) | 136.3 (134.6-138.0) | 137.9 (136.4-139.3) | 140.2 (136.1-144.2) |
| High-income Asia Pacific            | 148.4 (145.0-151.9) | 143.8 (141.8-145.7) | 140.8 (139.1-142.5) | 137.8 (136.1-139.3) | 135.6 (132.0-139.2) |
| High-income western                 | 145.8 (142.6-149.2) | 142.7 (141.0-144.2) | 141.0 (139.9-142.2) | 139.0 (137.9-140.1) | 136.3 (133.8-138.9) |
| Latin America & Caribbean           | 142.3 (135.0-149.0) | 141.8 (138.1-145.4) | 140.5 (138.3-142.6) | 140.0 (138.5-141.6) | 141.5 (138.6-144.8) |
| Oceania                             | 129.2 (121.1-137.1) | 131.0 (126.7-135.2) | 132.6 (128.1-137.4) | 134.2 (129.9-138.8) | 136.3 (129.0-143.5) |
| South Asia                          | 130.7 (120.8-140.3) | 132.1 (127.1-136.9) | 133.7 (130.7-136.5) | 135.9 (134.0-137.9) | 137.2 (133.3-140.9) |
| Sub-Saharan Africa                  | 139.8 (134.2-146.0) | 141.3 (138.1-144.5) | 142.1 (139.8-144.3) | 142.6 (140.8-144.3) | 142.2 (139.3-145.2) |
| <b>70-74 years</b>                  |                     |                     |                     |                     |                     |
| World                               | 142.1 (138.9-145.5) | 141.3 (139.6-142.9) | 140.5 (139.5-141.5) | 140.6 (139.8-141.4) | 140.8 (139.1-142.6) |
| Central & Eastern Europe            | 150.6 (145.3-156.1) | 150.6 (148.1-153.3) | 149.3 (147.1-151.4) | 148.8 (146.6-151.0) | 150.0 (146.2-153.7) |
| Central Asia & MENA                 | 141.9 (133.6-149.8) | 142.2 (137.8-146.3) | 141.8 (139.5-144.1) | 141.8 (140.1-143.4) | 141.9 (139.1-144.8) |
| East & Southeast Asia               | 136.1 (129.6-142.6) | 136.9 (134.3-139.4) | 138.0 (136.2-139.7) | 139.6 (138.1-141.2) | 142.1 (137.9-146.2) |
| High-income Asia Pacific            | 150.6 (147.1-154.2) | 145.6 (143.6-147.6) | 142.1 (140.3-143.9) | 139.2 (137.5-140.9) | 136.9 (133.1-140.6) |
| High-income western                 | 147.7 (144.3-151.2) | 145.2 (143.5-146.9) | 142.5 (141.3-143.8) | 140.6 (139.4-141.7) | 137.8 (135.1-140.4) |
| Latin America & Caribbean           | 143.5 (136.1-150.6) | 143.1 (139.3-146.9) | 141.7 (139.4-143.9) | 141.2 (139.6-142.9) | 142.7 (139.6-146.0) |
| Oceania                             | 130.2 (122.0-138.4) | 132.1 (127.5-136.7) | 133.7 (128.8-138.8) | 135.3 (130.5-140.2) | 137.5 (129.9-144.8) |
| South Asia                          | 131.9 (121.7-141.7) | 133.3 (128.1-138.3) | 134.9 (131.8-137.9) | 137.3 (135.3-139.4) | 138.6 (134.6-142.4) |
| Sub-Saharan Africa                  | 141.1 (135.2-147.5) | 142.6 (139.3-146.0) | 143.4 (140.9-145.9) | 144.0 (142.1-145.9) | 143.8 (140.7-146.9) |
| <b>75-79 years</b>                  |                     |                     |                     |                     |                     |
| World                               | 143.4 (140.2-146.8) | 142.6 (140.9-144.3) | 141.0 (139.9-142.1) | 141.6 (140.8-142.4) | 141.8 (140.1-143.6) |
| Central & Eastern Europe            | 151.4 (145.8-157.2) | 151.4 (148.6-154.3) | 149.9 (147.5-152.3) | 149.5 (147.0-152.1) | 150.5 (146.2-154.7) |
| Central Asia & MENA                 | 143.1 (134.5-151.4) | 143.4 (138.8-147.6) | 143.0 (140.5-145.5) | 143.2 (141.3-145.0) | 143.2 (140.3-146.3) |
| East & Southeast Asia               | 137.0 (130.4-143.6) | 137.8 (135.2-140.4) | 138.9 (137.1-140.7) | 140.6 (139.0-142.2) | 143.1 (138.7-147.4) |
| High-income Asia Pacific            | 151.7 (148.1-155.4) | 146.7 (144.6-148.8) | 143.0 (141.2-144.8) | 140.1 (138.3-141.9) | 137.5 (133.6-141.4) |

| Mean systolic blood pressure (mmHg) |                     |                     |                     |                     |                     |
|-------------------------------------|---------------------|---------------------|---------------------|---------------------|---------------------|
| Super-region (Men)                  | Year                |                     |                     |                     |                     |
|                                     | 1975                | 1985                | 1995                | 2005                | 2015                |
| High-income western                 | 148.8 (145.4-152.4) | 146.3 (144.6-148.1) | 142.7 (141.5-144.1) | 141.4 (140.2-142.5) | 138.7 (135.8-141.5) |
| Latin America & Caribbean           | 144.2 (136.5-151.6) | 143.7 (139.7-147.5) | 142.3 (139.9-144.7) | 141.9 (140.1-143.7) | 143.3 (140.1-146.7) |
| Oceania                             | 131.3 (122.9-139.7) | 132.9 (127.7-138.1) | 134.4 (129.1-139.7) | 135.7 (130.6-141.0) | 137.9 (129.8-145.6) |
| South Asia                          | 132.7 (122.1-142.8) | 134.1 (128.7-139.2) | 135.8 (132.6-138.8) | 138.3 (136.1-140.4) | 139.5 (135.4-143.4) |
| Sub-Saharan Africa                  | 141.7 (135.6-148.3) | 143.2 (139.7-146.7) | 144.1 (141.4-146.7) | 144.7 (142.7-146.7) | 144.7 (141.4-148.0) |
| <b>80-84 years</b>                  |                     |                     |                     |                     |                     |
| World                               | 144.3 (141.1-147.7) | 143.0 (141.3-144.8) | 142.0 (141.0-143.1) | 141.7 (140.9-142.6) | 141.9 (140.1-143.7) |
| Central & Eastern Europe            | 151.6 (145.4-157.9) | 151.5 (148.3-154.7) | 149.9 (147.2-152.6) | 149.8 (147.2-152.4) | 150.4 (146.4-154.6) |
| Central Asia & MENA                 | 144.0 (135.2-152.4) | 143.7 (139.0-148.3) | 143.4 (140.7-146.1) | 143.6 (141.6-145.5) | 143.4 (140.2-146.6) |
| East & Southeast Asia               | 137.2 (130.3-144.0) | 137.9 (135.2-140.6) | 139.1 (137.2-141.0) | 140.9 (139.2-142.6) | 143.4 (138.8-147.9) |
| High-income Asia Pacific            | 152.4 (148.7-156.3) | 147.4 (145.2-149.5) | 143.4 (141.4-145.4) | 140.3 (138.4-142.2) | 138.1 (134.0-142.2) |
| High-income western                 | 149.1 (145.6-152.8) | 146.7 (144.8-148.6) | 144.0 (142.7-145.4) | 141.7 (140.4-142.9) | 139.1 (136.2-141.9) |
| Latin America & Caribbean           | 144.1 (136.0-151.8) | 143.3 (139.2-147.4) | 142.0 (139.5-144.5) | 141.6 (139.6-143.6) | 143.1 (139.8-146.6) |
| Oceania                             | 131.6 (122.7-140.3) | 132.7 (126.9-138.6) | 134.3 (128.3-140.3) | 135.6 (130.0-141.5) | 137.6 (129.3-145.8) |
| South Asia                          | 133.2 (122.3-143.4) | 134.5 (128.9-139.8) | 136.3 (132.9-139.5) | 138.8 (136.4-141.1) | 140.0 (135.8-144.0) |
| Sub-Saharan Africa                  | 141.7 (135.4-148.5) | 143.0 (139.3-146.7) | 144.0 (141.0-147.0) | 144.6 (142.2-147.0) | 144.8 (141.2-148.4) |
| <b>85+ years</b>                    |                     |                     |                     |                     |                     |
| World                               | 144.5 (141.1-148.1) | 142.5 (140.7-144.5) | 141.4 (140.1-142.7) | 140.7 (139.7-141.8) | 140.9 (139.1-142.7) |
| Central & Eastern Europe            | 150.5 (143.8-157.4) | 150.4 (146.5-154.3) | 148.8 (145.3-152.3) | 148.3 (145.1-151.5) | 149.4 (144.6-154.2) |
| Central Asia & MENA                 | 143.8 (134.2-152.8) | 143.4 (137.8-148.7) | 142.9 (139.5-146.2) | 143.2 (140.7-145.8) | 143.5 (139.9-147.2) |
| East & Southeast Asia               | 136.2 (129.2-143.4) | 136.8 (133.8-139.8) | 138.1 (135.8-140.3) | 139.9 (137.8-141.9) | 142.6 (138.0-147.2) |
| High-income Asia Pacific            | 152.9 (148.8-157.1) | 147.4 (144.9-150.0) | 143.3 (140.9-145.7) | 140.1 (137.8-142.4) | 138.1 (133.5-142.6) |
| High-income western                 | 148.8 (145.1-152.7) | 145.9 (143.7-147.9) | 143.2 (141.6-144.8) | 140.7 (139.2-142.1) | 138.3 (135.3-141.3) |
| Latin America & Caribbean           | 142.5 (134.3-150.6) | 141.9 (137.4-146.4) | 140.5 (137.6-143.4) | 140.4 (137.9-142.9) | 142.2 (138.2-146.3) |
| Oceania                             | 128.4 (117.6-139.1) | 131.2 (124.1-138.6) | 132.9 (125.5-140.3) | 134.4 (127.3-141.7) | 136.2 (126.8-145.5) |
| South Asia                          | 133.4 (122.0-144.3) | 134.8 (128.6-140.6) | 136.5 (132.7-140.2) | 139.0 (136.2-141.9) | 140.2 (135.5-144.8) |
| Sub-Saharan Africa                  | 140.7 (134.2-147.8) | 141.9 (137.9-146.0) | 142.9 (139.4-146.3) | 143.7 (140.5-147.1) | 144.0 (139.9-148.3) |

| Mean systolic blood pressure (mmHg) |                     |                     |                     |                     |                     |
|-------------------------------------|---------------------|---------------------|---------------------|---------------------|---------------------|
| Super-region (Women)                | Year                |                     |                     |                     |                     |
|                                     | 1975                | 1985                | 1995                | 2005                | 2015                |
| <b>18-19 years</b>                  |                     |                     |                     |                     |                     |
| World                               | 111.6 (109.6-113.6) | 111.4 (110.4-112.4) | 111.8 (111.1-112.4) | 111.7 (111.2-112.2) | 112.2 (111.3-113.1) |
| Central & Eastern Europe            | 116.5 (113.1-119.9) | 116.0 (114.5-117.7) | 114.7 (113.4-116.1) | 113.2 (111.7-114.7) | 111.8 (109.6-113.8) |
| Central Asia & MENA                 | 114.1 (109.9-118.4) | 114.2 (112.0-116.5) | 113.6 (112.2-115.1) | 112.6 (111.3-113.8) | 111.7 (109.8-113.6) |
| East & Southeast Asia               | 107.7 (104.6-111.0) | 108.2 (106.9-109.6) | 108.6 (107.5-109.5) | 108.7 (107.8-109.6) | 109.9 (108.1-111.7) |
| High-income Asia Pacific            | 111.7 (109.2-114.0) | 110.1 (108.8-111.4) | 108.5 (107.5-109.6) | 106.3 (105.4-107.2) | 104.3 (102.6-106.0) |
| High-income western                 | 115.2 (113.4-117.1) | 113.3 (112.3-114.2) | 111.2 (110.5-112.0) | 109.7 (108.9-110.5) | 108.5 (107.0-110.0) |
| Latin America & Caribbean           | 114.1 (110.4-117.9) | 113.4 (111.3-115.3) | 112.1 (110.8-113.3) | 110.8 (109.8-111.8) | 110.7 (109.0-112.4) |
| Oceania                             | 111.7 (106.9-116.4) | 113.1 (110.4-115.9) | 115.0 (112.0-117.9) | 116.7 (113.7-119.7) | 118.9 (114.1-123.7) |
| South Asia                          | 111.2 (105.8-116.4) | 112.4 (109.8-115.0) | 113.6 (111.9-115.2) | 114.5 (113.3-115.8) | 114.7 (112.7-116.8) |
| Sub-Saharan Africa                  | 111.9 (108.7-115.1) | 113.2 (111.4-115.0) | 114.2 (112.9-115.6) | 114.7 (113.6-115.9) | 114.8 (113.0-116.5) |
| <b>20-24 years</b>                  |                     |                     |                     |                     |                     |
| World                               | 111.5 (109.5-113.5) | 111.5 (110.5-112.4) | 111.5 (110.9-112.0) | 111.7 (111.2-112.1) | 111.9 (111.0-112.8) |
| Central & Eastern Europe            | 116.3 (112.9-119.7) | 116.1 (114.6-117.6) | 114.5 (113.4-115.8) | 112.9 (111.6-114.3) | 111.4 (109.3-113.5) |
| Central Asia & MENA                 | 114.2 (110.0-118.4) | 114.3 (112.1-116.4) | 113.8 (112.4-115.1) | 112.5 (111.5-113.6) | 111.5 (109.9-113.2) |
| East & Southeast Asia               | 107.6 (104.4-111.0) | 108.2 (106.9-109.5) | 108.5 (107.6-109.5) | 108.8 (108.0-109.6) | 109.9 (108.0-111.9) |
| High-income Asia Pacific            | 112.8 (110.8-114.8) | 110.4 (109.1-111.7) | 108.9 (107.9-109.9) | 106.6 (105.8-107.5) | 104.5 (102.9-106.2) |
| High-income western                 | 114.9 (113.1-116.8) | 112.8 (111.9-113.7) | 111.0 (110.4-111.7) | 109.3 (108.7-110.0) | 108.1 (106.6-109.5) |
| Latin America & Caribbean           | 114.3 (110.4-118.1) | 113.5 (111.5-115.5) | 112.2 (111.0-113.4) | 111.0 (110.1-111.8) | 110.8 (109.1-112.4) |
| Oceania                             | 110.7 (106.0-115.4) | 112.1 (109.7-114.5) | 114.0 (111.3-116.7) | 115.7 (113.1-118.4) | 117.8 (113.3-122.5) |
| South Asia                          | 111.1 (105.6-116.4) | 112.4 (109.7-115.0) | 113.5 (111.9-115.0) | 114.5 (113.4-115.7) | 114.7 (112.7-116.7) |
| Sub-Saharan Africa                  | 111.9 (108.7-115.0) | 113.2 (111.4-114.9) | 114.2 (112.9-115.5) | 114.6 (113.6-115.7) | 114.7 (113.0-116.3) |
| <b>25-29 years</b>                  |                     |                     |                     |                     |                     |
| World                               | 112.7 (110.7-114.7) | 112.5 (111.5-113.5) | 112.3 (111.7-112.9) | 112.5 (112.1-113.0) | 112.6 (111.7-113.6) |
| Central & Eastern Europe            | 117.5 (114.0-121.0) | 117.2 (115.7-118.7) | 115.6 (114.5-116.8) | 113.9 (112.6-115.2) | 112.2 (109.9-114.5) |
| Central Asia & MENA                 | 115.5 (111.1-120.0) | 115.5 (113.3-117.7) | 115.0 (113.7-116.3) | 113.7 (112.8-114.7) | 112.4 (110.8-114.0) |
| East & Southeast Asia               | 108.7 (105.3-112.2) | 109.2 (107.9-110.6) | 109.5 (108.6-110.4) | 110.0 (109.1-110.8) | 111.0 (108.9-113.2) |
| High-income Asia Pacific            | 115.2 (113.2-117.1) | 111.9 (110.5-113.3) | 110.3 (109.3-111.4) | 108.0 (107.2-108.8) | 105.9 (104.2-107.7) |
| High-income western                 | 115.6 (113.7-117.5) | 113.1 (112.2-114.0) | 111.7 (111.0-112.3) | 109.7 (109.1-110.4) | 108.3 (106.9-109.8) |
| Latin America & Caribbean           | 115.5 (111.4-119.4) | 114.8 (112.6-116.7) | 113.3 (112.1-114.5) | 112.0 (111.2-112.9) | 111.8 (110.1-113.6) |
| Oceania                             | 110.1 (105.2-114.9) | 111.7 (109.4-114.0) | 113.5 (111.0-116.0) | 115.4 (112.7-118.0) | 117.5 (112.9-122.3) |
| South Asia                          | 111.8 (106.0-117.2) | 113.0 (110.3-115.8) | 114.2 (112.6-115.8) | 115.3 (114.2-116.4) | 115.5 (113.5-117.5) |
| Sub-Saharan Africa                  | 112.8 (109.4-116.1) | 114.2 (112.4-115.9) | 115.3 (114.0-116.6) | 115.7 (114.7-116.7) | 115.6 (113.9-117.2) |
| <b>30-34 years</b>                  |                     |                     |                     |                     |                     |
| World                               | 114.7 (112.5-117.0) | 114.4 (113.3-115.5) | 114.2 (113.6-114.9) | 114.1 (113.6-114.6) | 114.4 (113.5-115.4) |
| Central & Eastern Europe            | 120.2 (116.4-123.9) | 119.8 (118.3-121.4) | 118.2 (116.9-119.5) | 116.2 (114.9-117.6) | 114.4 (112.0-116.8) |
| Central Asia & MENA                 | 117.8 (113.1-122.7) | 117.9 (115.6-120.3) | 117.3 (115.9-118.6) | 116.0 (115.1-117.0) | 114.3 (112.6-116.0) |
| East & Southeast Asia               | 110.7 (107.1-114.5) | 111.1 (109.7-112.5) | 111.5 (110.6-112.5) | 111.9 (111.0-112.8) | 113.3 (111.1-115.5) |
| High-income Asia Pacific            | 118.0 (115.8-120.1) | 115.0 (113.6-116.3) | 112.7 (111.6-113.8) | 110.2 (109.3-111.1) | 107.9 (106.0-109.7) |
| High-income western                 | 117.6 (115.6-119.8) | 114.9 (113.9-115.9) | 113.1 (112.4-113.8) | 111.2 (110.6-111.9) | 109.6 (108.0-111.1) |
| Latin America & Caribbean           | 117.8 (113.5-122.1) | 117.0 (114.7-119.1) | 115.4 (114.1-116.7) | 114.0 (113.1-115.0) | 113.9 (112.0-115.8) |
| Oceania                             | 110.6 (105.4-115.8) | 112.3 (109.8-114.6) | 114.2 (111.6-116.8) | 116.1 (113.4-119.0) | 118.4 (113.5-123.5) |
| South Asia                          | 113.2 (106.9-119.1) | 114.5 (111.5-117.5) | 115.8 (114.1-117.5) | 116.9 (115.8-118.1) | 117.1 (114.9-119.3) |
| Sub-Saharan Africa                  | 114.8 (111.1-118.4) | 116.2 (114.3-118.1) | 117.4 (116.1-118.8) | 117.8 (116.8-118.9) | 117.7 (115.9-119.4) |
| <b>35-39 years</b>                  |                     |                     |                     |                     |                     |
| World                               | 117.9 (115.5-120.4) | 117.5 (116.3-118.6) | 117.2 (116.5-117.8) | 116.7 (116.2-117.3) | 117.1 (116.1-118.2) |

| Mean systolic blood pressure (mmHg) |                     |                     |                     |                     |                     |
|-------------------------------------|---------------------|---------------------|---------------------|---------------------|---------------------|
| Super-region (Women)                | Year                |                     |                     |                     |                     |
|                                     | 1975                | 1985                | 1995                | 2005                | 2015                |
| Central & Eastern Europe            | 124.0 (119.6-128.4) | 123.7 (122.0-125.4) | 121.9 (120.5-123.2) | 119.8 (118.3-121.3) | 117.8 (115.1-120.4) |
| Central Asia & MENA                 | 121.2 (116.2-126.5) | 121.3 (118.8-123.9) | 120.6 (119.2-122.0) | 119.2 (118.2-120.2) | 117.3 (115.4-119.2) |
| East & Southeast Asia               | 113.5 (109.5-117.7) | 114.1 (112.6-115.7) | 114.5 (113.4-115.6) | 114.8 (113.8-115.7) | 116.4 (114.0-118.9) |
| High-income Asia Pacific            | 121.6 (119.2-123.9) | 118.8 (117.4-120.1) | 115.9 (114.6-117.1) | 113.1 (112.1-114.0) | 110.6 (108.6-112.7) |
| High-income western                 | 120.9 (118.6-123.3) | 117.7 (116.6-118.8) | 115.4 (114.6-116.1) | 113.7 (113.0-114.4) | 111.8 (110.0-113.4) |
| Latin America & Caribbean           | 121.1 (116.2-125.8) | 120.1 (117.5-122.4) | 118.4 (116.9-119.8) | 116.8 (115.8-117.8) | 116.7 (114.6-118.8) |
| Oceania                             | 111.9 (106.0-117.6) | 113.7 (111.0-116.3) | 115.9 (113.0-118.7) | 117.9 (115.0-120.8) | 120.3 (115.0-126.0) |
| South Asia                          | 115.2 (108.2-121.8) | 116.7 (113.3-120.0) | 118.2 (116.2-120.0) | 119.4 (118.1-120.6) | 119.5 (117.1-122.0) |
| Sub-Saharan Africa                  | 117.7 (113.5-121.6) | 119.2 (117.0-121.3) | 120.5 (119.0-122.0) | 121.0 (119.9-122.1) | 120.8 (118.8-122.7) |
| <b>40-44 years</b>                  |                     |                     |                     |                     |                     |
| World                               | 121.5 (118.9-124.3) | 121.2 (119.9-122.5) | 120.6 (119.9-121.4) | 120.2 (119.6-120.8) | 120.4 (119.1-121.7) |
| Central & Eastern Europe            | 129.0 (124.3-133.6) | 128.6 (126.7-130.6) | 126.6 (125.1-128.1) | 124.2 (122.5-126.0) | 122.0 (119.1-124.9) |
| Central Asia & MENA                 | 125.3 (119.6-131.3) | 125.6 (122.7-128.5) | 124.8 (123.2-126.4) | 123.2 (122.1-124.3) | 121.0 (119.0-123.1) |
| East & Southeast Asia               | 117.0 (112.5-121.7) | 117.8 (116.0-119.6) | 118.0 (116.8-119.2) | 118.4 (117.3-119.5) | 120.1 (117.3-123.1) |
| High-income Asia Pacific            | 126.3 (123.7-128.9) | 122.9 (121.4-124.4) | 120.0 (118.7-121.3) | 116.5 (115.4-117.5) | 113.9 (111.6-116.3) |
| High-income western                 | 124.8 (122.3-127.5) | 121.6 (120.5-122.8) | 118.8 (118.0-119.6) | 116.7 (115.9-117.5) | 114.7 (112.8-116.6) |
| Latin America & Caribbean           | 125.0 (119.6-130.3) | 124.0 (121.1-126.6) | 122.0 (120.4-123.6) | 120.3 (119.2-121.5) | 120.2 (117.8-122.5) |
| Oceania                             | 113.9 (107.4-120.2) | 115.9 (112.9-118.8) | 118.2 (115.0-121.4) | 120.6 (117.5-123.7) | 123.2 (117.2-129.4) |
| South Asia                          | 117.8 (109.9-125.2) | 119.5 (115.7-123.1) | 121.1 (119.0-123.2) | 122.5 (121.1-123.9) | 122.6 (119.9-125.3) |
| Sub-Saharan Africa                  | 121.2 (116.6-125.6) | 123.0 (120.6-125.4) | 124.4 (122.8-126.1) | 124.9 (123.7-126.1) | 124.6 (122.4-126.8) |
| <b>45-49 years</b>                  |                     |                     |                     |                     |                     |
| World                               | 126.4 (123.4-129.3) | 125.9 (124.4-127.3) | 124.9 (124.1-125.7) | 124.4 (123.7-125.0) | 124.3 (122.8-125.9) |
| Central & Eastern Europe            | 134.9 (129.4-140.2) | 134.4 (132.2-136.7) | 132.0 (130.4-133.7) | 129.4 (127.5-131.3) | 127.1 (123.8-130.3) |
| Central Asia & MENA                 | 130.2 (123.9-136.7) | 130.3 (127.1-133.6) | 129.5 (127.8-131.3) | 127.8 (126.6-129.0) | 125.4 (123.1-127.7) |
| East & Southeast Asia               | 121.0 (115.9-126.3) | 121.9 (119.9-123.9) | 122.3 (120.9-123.7) | 122.7 (121.5-123.8) | 124.5 (121.3-127.9) |
| High-income Asia Pacific            | 131.6 (128.7-134.4) | 127.5 (125.8-129.2) | 124.5 (123.1-125.9) | 120.4 (119.2-121.6) | 117.3 (114.8-120.0) |
| High-income western                 | 129.5 (126.7-132.5) | 126.5 (125.2-127.9) | 123.0 (122.1-123.9) | 120.3 (119.4-121.3) | 118.3 (116.2-120.4) |
| Latin America & Caribbean           | 129.7 (123.6-135.7) | 128.5 (125.3-131.4) | 126.3 (124.4-128.1) | 124.4 (123.1-125.7) | 124.1 (121.5-126.7) |
| Oceania                             | 116.2 (108.9-123.5) | 118.6 (115.2-121.8) | 121.3 (117.7-124.8) | 123.9 (120.5-127.4) | 126.8 (120.3-133.5) |
| South Asia                          | 120.8 (112.0-129.1) | 122.7 (118.5-126.8) | 124.5 (122.1-126.9) | 126.1 (124.6-127.7) | 126.3 (123.1-129.3) |
| Sub-Saharan Africa                  | 125.4 (120.3-130.3) | 127.5 (124.7-130.0) | 128.9 (127.1-130.8) | 129.5 (128.1-130.9) | 129.1 (126.7-131.6) |
| <b>50-54 years</b>                  |                     |                     |                     |                     |                     |
| World                               | 131.2 (128.1-134.4) | 130.3 (128.8-131.9) | 129.5 (128.6-130.4) | 128.7 (128.0-129.4) | 128.6 (127.0-130.2) |
| Central & Eastern Europe            | 141.1 (135.1-146.8) | 140.5 (138.1-142.9) | 137.9 (136.1-139.8) | 135.0 (132.9-137.1) | 132.3 (128.5-136.0) |
| Central Asia & MENA                 | 135.2 (128.1-142.6) | 135.4 (131.8-139.0) | 134.7 (132.7-136.7) | 132.6 (131.3-134.0) | 130.1 (127.6-132.6) |
| East & Southeast Asia               | 125.3 (119.6-131.1) | 126.2 (124.0-128.4) | 126.8 (125.3-128.3) | 127.0 (125.6-128.3) | 129.1 (125.5-132.9) |
| High-income Asia Pacific            | 137.0 (133.7-140.1) | 132.5 (130.7-134.4) | 129.0 (127.5-130.6) | 124.9 (123.5-126.2) | 121.0 (118.2-123.9) |
| High-income western                 | 134.9 (131.7-138.2) | 131.3 (129.9-132.8) | 128.0 (127.0-129.0) | 124.6 (123.6-125.6) | 122.2 (119.9-124.6) |
| Latin America & Caribbean           | 134.6 (127.9-141.2) | 133.2 (129.7-136.5) | 130.8 (128.8-132.8) | 128.7 (127.3-130.1) | 128.5 (125.6-131.4) |
| Oceania                             | 119.2 (111.0-127.2) | 121.8 (118.0-125.5) | 124.7 (120.8-128.7) | 127.5 (123.6-131.4) | 130.9 (123.9-138.2) |
| South Asia                          | 124.0 (114.2-133.3) | 126.1 (121.4-130.7) | 128.1 (125.5-130.7) | 130.0 (128.3-131.7) | 130.2 (126.7-133.6) |
| Sub-Saharan Africa                  | 129.9 (124.1-135.4) | 132.1 (129.0-135.0) | 133.9 (131.8-136.0) | 134.4 (132.9-135.9) | 134.0 (131.3-136.6) |
| <b>55-59 years</b>                  |                     |                     |                     |                     |                     |
| World                               | 135.2 (131.7-138.8) | 135.4 (133.7-137.0) | 134.4 (133.4-135.3) | 132.9 (132.2-133.7) | 132.8 (131.1-134.5) |
| Central & Eastern Europe            | 147.1 (140.3-153.6) | 146.6 (143.8-149.3) | 143.8 (141.7-146.0) | 140.4 (138.1-142.7) | 137.4 (133.3-141.4) |
| Central Asia & MENA                 | 140.2 (132.4-148.3) | 140.3 (136.3-144.3) | 139.4 (137.2-141.6) | 137.3 (135.8-138.8) | 134.5 (131.7-137.3) |

| Mean systolic blood pressure (mmHg) |                     |                     |                     |                     |                     |
|-------------------------------------|---------------------|---------------------|---------------------|---------------------|---------------------|
| Super-region (Women)                | Year                |                     |                     |                     |                     |
|                                     | 1975                | 1985                | 1995                | 2005                | 2015                |
| East & Southeast Asia               | 129.4 (123.2-135.8) | 130.4 (128.0-132.9) | 131.0 (129.4-132.7) | 131.4 (129.9-132.8) | 133.5 (129.7-137.6) |
| High-income Asia Pacific            | 142.1 (138.6-145.5) | 137.3 (135.3-139.3) | 133.3 (131.6-135.0) | 129.0 (127.4-130.6) | 124.7 (121.7-127.9) |
| High-income western                 | 139.5 (136.2-143.0) | 136.1 (134.6-137.8) | 133.2 (132.1-134.3) | 129.1 (128.1-130.2) | 126.3 (123.7-129.0) |
| Latin America & Caribbean           | 139.4 (132.1-146.6) | 137.9 (134.1-141.6) | 135.3 (133.1-137.4) | 132.9 (131.4-134.5) | 132.7 (129.6-136.0) |
| Oceania                             | 122.1 (113.1-131.0) | 124.7 (120.4-128.9) | 128.0 (123.5-132.4) | 131.2 (127.0-135.5) | 134.9 (127.3-142.8) |
| South Asia                          | 127.1 (116.4-137.3) | 129.4 (124.3-134.4) | 131.6 (128.8-134.5) | 133.6 (131.8-135.5) | 133.9 (130.1-137.8) |
| Sub-Saharan Africa                  | 134.3 (128.0-140.3) | 136.6 (133.3-139.8) | 138.6 (136.4-140.9) | 139.1 (137.4-140.8) | 138.6 (135.7-141.5) |
| <b>60-64 years</b>                  |                     |                     |                     |                     |                     |
| World                               | 140.6 (137.1-144.2) | 139.4 (137.7-141.2) | 138.1 (137.1-139.1) | 136.7 (135.9-137.5) | 136.5 (134.6-138.4) |
| Central & Eastern Europe            | 152.3 (145.2-159.2) | 151.6 (148.6-154.4) | 148.5 (146.4-150.8) | 145.2 (142.8-147.5) | 142.0 (137.7-146.3) |
| Central Asia & MENA                 | 144.4 (136.2-152.8) | 144.4 (140.2-148.7) | 143.5 (141.3-145.9) | 141.3 (139.7-143.0) | 138.2 (135.1-141.2) |
| East & Southeast Asia               | 133.0 (126.4-139.8) | 134.0 (131.5-136.6) | 134.6 (132.9-136.4) | 135.1 (133.6-136.6) | 137.3 (133.0-141.8) |
| High-income Asia Pacific            | 146.5 (142.9-150.1) | 141.3 (139.2-143.4) | 137.1 (135.3-138.9) | 132.4 (130.7-134.1) | 128.6 (125.1-132.2) |
| High-income western                 | 145.0 (141.3-148.9) | 140.8 (139.1-142.6) | 137.4 (136.3-138.6) | 133.5 (132.4-134.6) | 130.3 (127.5-133.1) |
| Latin America & Caribbean           | 143.6 (135.8-151.2) | 141.9 (137.9-145.8) | 139.1 (136.7-141.4) | 136.6 (135.0-138.3) | 136.4 (133.1-139.8) |
| Oceania                             | 124.6 (115.1-134.0) | 127.5 (122.9-132.1) | 131.1 (126.3-135.7) | 134.4 (129.9-139.2) | 138.2 (130.0-146.7) |
| South Asia                          | 129.8 (118.5-140.6) | 132.3 (126.8-137.6) | 134.6 (131.6-137.6) | 136.7 (134.7-138.7) | 137.1 (133.0-141.3) |
| Sub-Saharan Africa                  | 138.0 (131.4-144.4) | 140.5 (137.0-144.0) | 142.5 (140.1-145.0) | 143.3 (141.5-145.1) | 142.7 (139.6-145.7) |
| <b>65-69 years</b>                  |                     |                     |                     |                     |                     |
| World                               | 144.3 (140.8-148.0) | 142.1 (140.3-143.9) | 141.7 (140.7-142.7) | 140.2 (139.3-141.0) | 139.2 (137.3-141.1) |
| Central & Eastern Europe            | 156.3 (149.0-163.4) | 155.7 (152.6-158.8) | 152.6 (150.1-155.1) | 149.1 (146.4-151.9) | 145.4 (141.1-149.7) |
| Central Asia & MENA                 | 147.6 (139.2-156.3) | 147.7 (143.4-152.2) | 146.7 (144.2-149.3) | 144.5 (142.7-146.3) | 141.1 (137.9-144.2) |
| East & Southeast Asia               | 135.8 (129.0-143.0) | 136.9 (134.3-139.5) | 137.5 (135.7-139.4) | 138.0 (136.4-139.6) | 140.4 (136.0-145.0) |
| High-income Asia Pacific            | 149.9 (146.1-153.6) | 144.4 (142.3-146.6) | 140.0 (138.2-141.9) | 135.2 (133.4-136.8) | 131.6 (127.8-135.5) |
| High-income western                 | 149.1 (145.2-153.1) | 143.9 (142.1-145.7) | 141.1 (139.9-142.3) | 137.5 (136.3-138.7) | 134.0 (131.2-136.8) |
| Latin America & Caribbean           | 147.0 (139.0-154.9) | 145.2 (141.1-149.2) | 142.4 (139.9-144.8) | 139.8 (138.1-141.6) | 139.5 (136.0-143.1) |
| Oceania                             | 126.7 (116.6-136.7) | 129.9 (124.8-135.0) | 133.3 (128.1-138.6) | 136.9 (131.9-142.0) | 141.0 (132.5-149.7) |
| South Asia                          | 132.0 (120.2-143.2) | 134.5 (128.9-140.0) | 136.9 (133.7-140.0) | 139.1 (137.0-141.2) | 139.4 (135.2-143.7) |
| Sub-Saharan Africa                  | 141.1 (134.3-147.7) | 143.8 (140.1-147.3) | 145.8 (143.3-148.3) | 146.5 (144.5-148.4) | 145.9 (142.6-149.1) |
| <b>70-74 years</b>                  |                     |                     |                     |                     |                     |
| World                               | 147.4 (143.8-151.1) | 146.0 (144.3-147.8) | 144.2 (143.2-145.2) | 142.3 (141.5-143.2) | 141.4 (139.6-143.3) |
| Central & Eastern Europe            | 159.1 (151.7-166.4) | 158.4 (155.2-161.7) | 155.2 (152.6-157.7) | 151.5 (148.8-154.1) | 148.3 (143.9-152.8) |
| Central Asia & MENA                 | 149.9 (141.4-158.9) | 150.0 (145.4-154.6) | 148.9 (146.3-151.5) | 146.5 (144.7-148.4) | 143.0 (139.7-146.3) |
| East & Southeast Asia               | 138.0 (131.0-145.4) | 139.1 (136.5-141.8) | 139.7 (137.8-141.6) | 140.2 (138.5-141.8) | 142.7 (138.2-147.4) |
| High-income Asia Pacific            | 152.7 (148.8-156.4) | 146.9 (144.7-149.1) | 142.3 (140.4-144.2) | 137.4 (135.6-139.2) | 133.7 (129.7-137.7) |
| High-income western                 | 152.5 (148.5-156.7) | 148.1 (146.3-150.0) | 144.4 (143.2-145.7) | 140.7 (139.5-141.9) | 137.0 (134.2-139.8) |
| Latin America & Caribbean           | 149.6 (141.4-157.6) | 147.8 (143.5-151.7) | 144.8 (142.2-147.3) | 142.2 (140.4-144.0) | 141.9 (138.3-145.4) |
| Oceania                             | 128.6 (118.1-139.0) | 131.6 (125.9-137.3) | 135.2 (129.4-141.0) | 138.8 (133.3-144.4) | 143.1 (134.5-151.9) |
| South Asia                          | 133.5 (121.6-144.8) | 136.1 (130.4-141.8) | 138.6 (135.3-141.7) | 140.8 (138.6-143.0) | 141.1 (136.8-145.5) |
| Sub-Saharan Africa                  | 143.3 (136.4-150.0) | 146.0 (142.2-149.6) | 148.0 (145.4-150.7) | 148.6 (146.6-150.7) | 148.3 (144.9-151.6) |
| <b>75-79 years</b>                  |                     |                     |                     |                     |                     |
| World                               | 149.8 (146.3-153.3) | 148.3 (146.6-150.0) | 145.5 (144.4-146.5) | 144.3 (143.4-145.1) | 143.1 (141.3-145.0) |
| Central & Eastern Europe            | 160.6 (153.2-168.0) | 160.0 (156.6-163.4) | 156.9 (154.0-159.7) | 153.1 (150.2-156.1) | 149.8 (144.9-154.7) |
| Central Asia & MENA                 | 151.1 (142.4-160.4) | 151.4 (146.7-156.1) | 150.4 (147.6-153.1) | 148.0 (145.9-150.2) | 144.8 (141.5-148.1) |
| East & Southeast Asia               | 139.6 (132.5-146.9) | 140.6 (138.0-143.4) | 141.2 (139.3-143.2) | 141.7 (139.9-143.4) | 144.3 (139.7-149.0) |
| High-income Asia Pacific            | 154.5 (150.6-158.3) | 148.8 (146.6-150.9) | 144.1 (142.2-146.0) | 139.2 (137.3-141.0) | 135.3 (131.4-139.4) |

| Mean systolic blood pressure (mmHg) |                     |                     |                     |                     |                     |
|-------------------------------------|---------------------|---------------------|---------------------|---------------------|---------------------|
| Super-region (Women)                | Year                |                     |                     |                     |                     |
|                                     | 1975                | 1985                | 1995                | 2005                | 2015                |
| High-income western                 | 154.9 (150.9-159.1) | 150.7 (148.9-152.6) | 146.2 (145.0-147.5) | 143.1 (141.9-144.3) | 139.4 (136.4-142.3) |
| Latin America & Caribbean           | 151.7 (143.3-160.0) | 149.6 (145.4-153.7) | 146.8 (144.2-149.4) | 144.1 (142.2-146.0) | 143.9 (140.2-147.5) |
| Oceania                             | 130.5 (119.7-141.1) | 133.0 (126.3-139.7) | 136.7 (130.0-143.3) | 139.9 (133.4-146.3) | 144.3 (135.0-153.6) |
| South Asia                          | 134.6 (122.4-146.1) | 137.2 (131.4-142.9) | 139.7 (136.4-142.9) | 141.9 (139.6-144.1) | 142.3 (137.9-146.6) |
| Sub-Saharan Africa                  | 144.9 (137.9-151.5) | 147.5 (143.7-151.1) | 149.6 (146.9-152.3) | 150.1 (148.0-152.2) | 149.8 (146.3-153.3) |
| <b>80-84 years</b>                  |                     |                     |                     |                     |                     |
| World                               | 151.8 (148.4-155.3) | 149.7 (148.0-151.4) | 147.7 (146.6-148.8) | 145.2 (144.3-146.1) | 143.8 (141.9-145.6) |
| Central & Eastern Europe            | 161.2 (153.3-168.8) | 160.4 (156.6-164.0) | 157.1 (154.1-160.3) | 153.4 (150.2-156.6) | 149.8 (145.0-154.5) |
| Central Asia & MENA                 | 152.0 (143.3-161.3) | 152.0 (146.9-157.1) | 150.9 (147.8-154.3) | 148.4 (146.0-150.8) | 144.5 (141.0-148.1) |
| East & Southeast Asia               | 140.6 (133.5-147.9) | 141.6 (138.8-144.3) | 142.2 (140.2-144.2) | 142.8 (141.0-144.6) | 145.2 (140.6-150.1) |
| High-income Asia Pacific            | 156.0 (152.1-159.8) | 150.3 (148.0-152.5) | 145.5 (143.6-147.4) | 140.5 (138.6-142.4) | 136.7 (132.6-141.0) |
| High-income western                 | 156.6 (152.6-160.9) | 152.5 (150.6-154.5) | 148.9 (147.5-150.2) | 144.9 (143.6-146.2) | 141.3 (138.4-144.1) |
| Latin America & Caribbean           | 153.2 (144.6-161.4) | 150.7 (146.3-154.9) | 147.8 (145.0-150.5) | 145.3 (143.2-147.4) | 145.1 (141.3-148.8) |
| Oceania                             | 131.7 (120.5-143.0) | 133.7 (125.6-141.8) | 137.0 (128.9-145.2) | 140.4 (132.7-148.3) | 144.8 (134.8-154.9) |
| South Asia                          | 135.3 (123.1-146.7) | 137.8 (131.9-143.4) | 140.3 (136.9-143.7) | 142.5 (140.2-144.8) | 142.8 (138.4-147.3) |
| Sub-Saharan Africa                  | 145.7 (138.8-152.3) | 148.0 (144.0-151.8) | 150.1 (147.2-153.1) | 150.7 (148.2-153.2) | 150.5 (146.6-154.1) |
| <b>85+ years</b>                    |                     |                     |                     |                     |                     |
| World                               | 153.4 (149.9-157.0) | 150.5 (148.6-152.4) | 148.2 (146.9-149.5) | 145.3 (144.2-146.4) | 143.8 (141.9-145.7) |
| Central & Eastern Europe            | 160.1 (151.2-168.9) | 159.2 (154.4-163.8) | 155.6 (151.5-159.9) | 151.8 (147.7-155.8) | 148.3 (142.8-153.9) |
| Central Asia & MENA                 | 152.3 (142.2-162.3) | 151.7 (145.6-157.7) | 150.4 (146.0-154.9) | 147.9 (144.4-151.2) | 144.1 (140.0-148.3) |
| East & Southeast Asia               | 141.1 (133.6-148.7) | 142.0 (138.9-145.2) | 142.7 (140.2-145.1) | 143.1 (140.9-145.4) | 145.9 (141.2-151.0) |
| High-income Asia Pacific            | 157.7 (153.6-161.9) | 151.7 (149.3-154.2) | 146.9 (144.7-149.1) | 141.9 (139.6-144.1) | 138.3 (133.7-142.9) |
| High-income western                 | 157.8 (153.6-162.2) | 153.1 (151.1-155.3) | 149.6 (148.0-151.2) | 145.7 (144.2-147.2) | 142.3 (139.2-145.4) |
| Latin America & Caribbean           | 153.8 (145.1-162.5) | 151.7 (146.9-156.4) | 148.5 (145.2-151.7) | 146.4 (143.7-149.2) | 146.1 (141.9-150.6) |
| Oceania                             | 129.2 (114.5-144.0) | 132.7 (121.6-143.9) | 136.2 (124.6-147.5) | 140.0 (129.2-151.1) | 144.1 (131.3-156.7) |
| South Asia                          | 135.3 (122.5-147.4) | 137.9 (131.4-144.1) | 140.5 (136.4-144.4) | 142.7 (139.7-145.8) | 143.0 (138.0-148.0) |
| Sub-Saharan Africa                  | 145.8 (138.6-152.9) | 148.0 (143.5-152.4) | 149.8 (146.1-153.6) | 150.5 (147.1-154.1) | 150.0 (145.5-154.4) |



| Mean diastolic blood pressure (mmHg) |                  |                  |                  |                  |                  |
|--------------------------------------|------------------|------------------|------------------|------------------|------------------|
| Super-region (Men)                   | Year             |                  |                  |                  |                  |
|                                      | 1975             | 1985             | 1995             | 2005             | 2015             |
| <b>18-19 years</b>                   |                  |                  |                  |                  |                  |
| World                                | 71.9 (70.2-73.6) | 71.9 (71.1-72.8) | 72.2 (71.6-72.7) | 72.4 (72.0-72.8) | 72.5 (71.7-73.2) |
| Central & Eastern Europe             | 76.3 (73.6-78.9) | 76.2 (74.9-77.5) | 75.7 (74.6-76.8) | 75.2 (74.0-76.4) | 74.9 (73.1-76.7) |
| Central Asia & MENA                  | 71.9 (68.4-75.3) | 72.1 (70.1-73.9) | 72.2 (71.1-73.4) | 72.5 (71.5-73.4) | 72.6 (71.2-74.0) |
| East & Southeast Asia                | 70.6 (67.8-73.4) | 71.2 (70.0-72.3) | 71.8 (70.9-72.6) | 72.6 (71.9-73.3) | 72.4 (70.9-74.0) |
| High-income Asia Pacific             | 70.9 (68.8-72.9) | 70.6 (69.5-71.7) | 70.4 (69.5-71.3) | 69.9 (69.2-70.7) | 69.4 (68.0-70.8) |
| High-income western                  | 72.7 (71.2-74.3) | 71.0 (70.2-71.8) | 69.5 (68.8-70.1) | 68.2 (67.6-68.8) | 67.3 (66.0-68.5) |
| Latin America & Caribbean            | 72.0 (68.7-75.0) | 72.6 (70.9-74.3) | 72.6 (71.5-73.8) | 72.1 (71.3-72.9) | 71.2 (69.8-72.7) |
| Oceania                              | 67.6 (63.7-71.4) | 68.0 (65.7-70.3) | 68.5 (65.9-71.0) | 68.9 (66.4-71.4) | 69.6 (65.7-73.6) |
| South Asia                           | 73.2 (68.7-77.6) | 73.7 (71.3-75.9) | 74.0 (72.5-75.4) | 74.5 (73.4-75.5) | 75.6 (73.9-77.3) |
| Sub-Saharan Africa                   | 68.4 (65.8-71.0) | 69.4 (67.9-70.8) | 70.0 (68.9-71.2) | 70.3 (69.3-71.3) | 70.5 (69.1-71.9) |
| <b>20-24 years</b>                   |                  |                  |                  |                  |                  |
| World                                | 73.3 (71.7-75.1) | 73.4 (72.6-74.3) | 73.6 (73.1-74.1) | 73.8 (73.4-74.2) | 73.9 (73.2-74.6) |
| Central & Eastern Europe             | 77.9 (75.4-80.5) | 78.2 (77.0-79.4) | 77.4 (76.4-78.4) | 76.9 (75.7-78.0) | 76.6 (74.8-78.4) |
| Central Asia & MENA                  | 73.2 (69.6-76.5) | 73.4 (71.5-75.2) | 73.5 (72.5-74.6) | 73.7 (72.9-74.5) | 74.0 (72.7-75.3) |
| East & Southeast Asia                | 71.7 (68.9-74.6) | 72.3 (71.1-73.4) | 73.0 (72.2-73.7) | 73.6 (73.0-74.3) | 73.5 (71.9-75.2) |
| High-income Asia Pacific             | 72.8 (71.0-74.6) | 72.7 (71.5-73.8) | 72.4 (71.5-73.2) | 72.0 (71.3-72.7) | 71.4 (70.0-72.8) |
| High-income western                  | 75.0 (73.5-76.5) | 73.2 (72.4-73.9) | 71.8 (71.2-72.4) | 70.5 (69.9-71.0) | 69.4 (68.2-70.6) |
| Latin America & Caribbean            | 73.6 (70.3-76.6) | 74.2 (72.5-75.8) | 74.3 (73.2-75.4) | 73.7 (72.9-74.5) | 72.8 (71.4-74.2) |
| Oceania                              | 68.8 (64.9-72.7) | 69.3 (67.2-71.3) | 69.7 (67.4-72.1) | 70.1 (67.8-72.4) | 70.8 (67.0-74.6) |
| South Asia                           | 74.3 (69.9-78.9) | 74.9 (72.5-77.1) | 75.1 (73.7-76.5) | 75.6 (74.6-76.6) | 76.8 (75.1-78.5) |
| Sub-Saharan Africa                   | 70.3 (67.7-72.9) | 71.2 (69.8-72.6) | 71.9 (70.8-73.0) | 72.2 (71.3-73.0) | 72.3 (71.0-73.7) |
| <b>25-29 years</b>                   |                  |                  |                  |                  |                  |
| World                                | 75.4 (73.8-77.1) | 75.5 (74.6-76.3) | 75.4 (74.9-76.0) | 75.7 (75.3-76.1) | 75.8 (75.0-76.6) |
| Central & Eastern Europe             | 80.2 (77.6-82.8) | 80.4 (79.2-81.5) | 79.6 (78.7-80.6) | 79.1 (78.0-80.1) | 78.8 (76.9-80.6) |
| Central Asia & MENA                  | 75.0 (71.4-78.4) | 75.3 (73.4-77.0) | 75.4 (74.4-76.3) | 75.5 (74.8-76.2) | 75.8 (74.6-77.1) |
| East & Southeast Asia                | 73.3 (70.5-76.2) | 73.8 (72.7-75.0) | 74.5 (73.8-75.3) | 75.3 (74.6-75.9) | 75.2 (73.4-76.9) |
| High-income Asia Pacific             | 75.5 (73.8-77.2) | 75.2 (74.1-76.4) | 75.1 (74.2-75.9) | 74.5 (73.8-75.2) | 74.0 (72.5-75.4) |
| High-income western                  | 77.7 (76.2-79.3) | 75.9 (75.1-76.6) | 74.6 (74.1-75.2) | 73.3 (72.8-73.9) | 72.1 (70.9-73.3) |
| Latin America & Caribbean            | 75.7 (72.4-78.8) | 76.3 (74.7-78.0) | 76.4 (75.3-77.5) | 75.9 (75.1-76.6) | 74.9 (73.5-76.3) |
| Oceania                              | 70.4 (66.5-74.3) | 70.9 (68.9-72.9) | 71.4 (69.2-73.5) | 71.7 (69.6-73.8) | 72.5 (68.7-76.2) |
| South Asia                           | 75.9 (71.3-80.4) | 76.4 (74.0-78.7) | 76.6 (75.2-78.0) | 77.1 (76.2-78.0) | 78.3 (76.6-80.1) |
| Sub-Saharan Africa                   | 72.7 (70.1-75.3) | 73.7 (72.3-75.1) | 74.3 (73.3-75.4) | 74.6 (73.8-75.4) | 74.8 (73.5-76.2) |
| <b>30-34 years</b>                   |                  |                  |                  |                  |                  |
| World                                | 77.2 (75.5-78.9) | 77.2 (76.4-78.1) | 77.2 (76.7-77.7) | 77.4 (77.0-77.8) | 77.5 (76.8-78.2) |
| Central & Eastern Europe             | 82.2 (79.7-84.8) | 82.4 (81.3-83.6) | 81.8 (80.9-82.8) | 81.1 (80.1-82.2) | 80.8 (78.9-82.7) |
| Central Asia & MENA                  | 76.6 (72.9-80.1) | 77.0 (75.1-78.7) | 77.1 (76.2-78.1) | 77.2 (76.5-77.9) | 77.4 (76.2-78.7) |
| East & Southeast Asia                | 74.8 (72.0-77.7) | 75.3 (74.2-76.5) | 76.1 (75.3-76.8) | 76.9 (76.2-77.6) | 76.7 (75.1-78.4) |
| High-income Asia Pacific             | 78.0 (76.2-79.7) | 77.4 (76.4-78.5) | 77.4 (76.5-78.3) | 76.7 (76.0-77.5) | 76.2 (74.8-77.7) |
| High-income western                  | 80.2 (78.7-81.8) | 78.3 (77.5-79.1) | 76.9 (76.3-77.5) | 75.7 (75.2-76.3) | 74.5 (73.3-75.7) |
| Latin America & Caribbean            | 77.8 (74.3-80.9) | 78.3 (76.6-80.0) | 78.4 (77.3-79.5) | 77.8 (77.1-78.6) | 76.8 (75.3-78.3) |
| Oceania                              | 71.8 (67.9-75.8) | 72.4 (70.4-74.4) | 72.8 (70.8-75.0) | 73.1 (71.0-75.2) | 73.9 (70.2-77.6) |
| South Asia                           | 77.2 (72.6-81.9) | 77.7 (75.3-80.1) | 78.0 (76.6-79.3) | 78.5 (77.5-79.4) | 79.6 (77.9-81.4) |
| Sub-Saharan Africa                   | 74.9 (72.3-77.7) | 75.9 (74.5-77.3) | 76.6 (75.5-77.7) | 76.8 (76.0-77.7) | 77.0 (75.7-78.4) |
| <b>35-39 years</b>                   |                  |                  |                  |                  |                  |
| World                                | 79.0 (77.3-80.8) | 78.9 (78.1-79.8) | 78.9 (78.4-79.4) | 78.9 (78.5-79.3) | 79.1 (78.3-79.8) |

| Mean diastolic blood pressure (mmHg) |                  |                  |                  |                  |                  |
|--------------------------------------|------------------|------------------|------------------|------------------|------------------|
| Super-region (Men)                   | Year             |                  |                  |                  |                  |
|                                      | 1975             | 1985             | 1995             | 2005             | 2015             |
| Central & Eastern Europe             | 84.2 (81.4-87.1) | 84.3 (83.1-85.5) | 83.6 (82.6-84.6) | 83.0 (81.9-84.0) | 82.6 (80.8-84.5) |
| Central Asia & MENA                  | 78.4 (74.6-81.9) | 78.6 (76.7-80.3) | 78.7 (77.7-79.7) | 78.8 (78.1-79.5) | 78.9 (77.7-80.2) |
| East & Southeast Asia                | 76.2 (73.3-79.2) | 76.8 (75.7-78.0) | 77.6 (76.8-78.3) | 78.4 (77.7-79.1) | 78.2 (76.6-80.0) |
| High-income Asia Pacific             | 80.0 (78.2-81.8) | 79.5 (78.5-80.5) | 79.3 (78.4-80.2) | 78.7 (78.0-79.5) | 78.2 (76.6-79.7) |
| High-income western                  | 82.4 (80.7-84.0) | 80.3 (79.6-81.1) | 78.7 (78.1-79.3) | 77.7 (77.2-78.3) | 76.6 (75.4-77.8) |
| Latin America & Caribbean            | 79.6 (76.0-82.8) | 80.1 (78.3-81.8) | 80.1 (79.0-81.2) | 79.5 (78.8-80.3) | 78.6 (77.0-80.1) |
| Oceania                              | 73.1 (69.1-77.1) | 73.6 (71.6-75.6) | 74.1 (72.0-76.3) | 74.4 (72.5-76.5) | 75.1 (71.3-78.9) |
| South Asia                           | 78.3 (73.6-83.1) | 78.8 (76.4-81.2) | 79.1 (77.7-80.5) | 79.6 (78.6-80.5) | 80.8 (79.0-82.6) |
| Sub-Saharan Africa                   | 76.8 (74.1-79.6) | 77.9 (76.4-79.3) | 78.6 (77.5-79.6) | 78.8 (78.0-79.6) | 78.9 (77.6-80.3) |
| <b>40-44 years</b>                   |                  |                  |                  |                  |                  |
| World                                | 80.4 (78.6-82.2) | 80.3 (79.4-81.2) | 80.3 (79.7-80.8) | 80.3 (79.9-80.7) | 80.3 (79.5-81.2) |
| Central & Eastern Europe             | 85.7 (83.0-88.5) | 85.9 (84.8-87.1) | 85.2 (84.3-86.2) | 84.6 (83.5-85.8) | 84.2 (82.3-86.2) |
| Central Asia & MENA                  | 79.6 (75.7-83.2) | 79.9 (78.0-81.7) | 80.1 (79.1-81.1) | 80.3 (79.6-81.0) | 80.4 (79.1-81.6) |
| East & Southeast Asia                | 77.6 (74.6-80.7) | 78.2 (77.0-79.4) | 78.9 (78.1-79.7) | 79.8 (79.0-80.5) | 79.6 (77.8-81.5) |
| High-income Asia Pacific             | 81.9 (80.1-83.6) | 81.2 (80.2-82.2) | 80.9 (80.0-81.7) | 80.3 (79.6-81.1) | 79.8 (78.2-81.3) |
| High-income western                  | 83.9 (82.3-85.6) | 82.1 (81.3-82.8) | 80.3 (79.7-80.9) | 79.2 (78.6-79.7) | 78.1 (76.9-79.3) |
| Latin America & Caribbean            | 81.1 (77.5-84.4) | 81.6 (79.8-83.4) | 81.7 (80.5-82.8) | 81.1 (80.3-81.9) | 80.0 (78.5-81.5) |
| Oceania                              | 74.1 (70.1-78.3) | 74.7 (72.7-76.8) | 75.2 (73.0-77.4) | 75.6 (73.6-77.6) | 76.2 (72.2-80.1) |
| South Asia                           | 79.2 (74.4-84.2) | 79.8 (77.3-82.2) | 80.1 (78.6-81.5) | 80.6 (79.6-81.5) | 81.8 (79.9-83.6) |
| Sub-Saharan Africa                   | 78.5 (75.7-81.3) | 79.6 (78.1-81.1) | 80.2 (79.2-81.4) | 80.5 (79.7-81.4) | 80.6 (79.2-82.1) |
| <b>45-49 years</b>                   |                  |                  |                  |                  |                  |
| World                                | 81.8 (80.1-83.6) | 81.7 (80.9-82.6) | 81.5 (81.0-82.0) | 81.5 (81.1-81.9) | 81.4 (80.5-82.3) |
| Central & Eastern Europe             | 87.2 (84.4-90.1) | 87.4 (86.1-88.7) | 86.6 (85.6-87.6) | 85.9 (84.8-87.1) | 85.6 (83.7-87.6) |
| Central Asia & MENA                  | 81.0 (77.1-84.7) | 81.4 (79.4-83.2) | 81.4 (80.3-82.4) | 81.6 (80.9-82.2) | 81.6 (80.3-82.9) |
| East & Southeast Asia                | 78.8 (75.7-81.9) | 79.4 (78.2-80.6) | 80.2 (79.3-81.0) | 81.0 (80.3-81.8) | 80.9 (78.9-82.8) |
| High-income Asia Pacific             | 83.4 (81.6-85.1) | 82.6 (81.5-83.6) | 82.2 (81.3-83.1) | 81.6 (80.8-82.3) | 80.9 (79.4-82.5) |
| High-income western                  | 85.2 (83.5-86.9) | 83.5 (82.7-84.3) | 81.6 (81.0-82.2) | 80.1 (79.6-80.7) | 79.2 (78.0-80.4) |
| Latin America & Caribbean            | 82.4 (78.7-85.8) | 82.9 (81.1-84.7) | 82.9 (81.8-84.1) | 82.3 (81.5-83.2) | 81.2 (79.7-82.8) |
| Oceania                              | 75.0 (70.8-79.2) | 75.5 (73.4-77.7) | 76.0 (73.8-78.3) | 76.5 (74.5-78.5) | 77.2 (73.3-81.1) |
| South Asia                           | 80.0 (75.1-85.1) | 80.6 (78.0-83.0) | 80.8 (79.3-82.3) | 81.4 (80.4-82.3) | 82.6 (80.7-84.5) |
| Sub-Saharan Africa                   | 79.8 (77.0-82.7) | 80.9 (79.4-82.5) | 81.6 (80.5-82.8) | 81.9 (81.1-82.8) | 82.0 (80.6-83.5) |
| <b>50-54 years</b>                   |                  |                  |                  |                  |                  |
| World                                | 82.6 (80.8-84.4) | 82.5 (81.6-83.4) | 82.3 (81.8-82.9) | 82.4 (82.0-82.8) | 82.2 (81.3-83.1) |
| Central & Eastern Europe             | 88.1 (85.3-90.9) | 88.4 (87.2-89.7) | 87.7 (86.7-88.8) | 87.0 (85.9-88.1) | 86.6 (84.6-88.7) |
| Central Asia & MENA                  | 81.8 (77.8-85.7) | 82.2 (80.2-84.1) | 82.4 (81.3-83.4) | 82.6 (81.8-83.3) | 82.7 (81.4-84.1) |
| East & Southeast Asia                | 79.7 (76.6-83.0) | 80.4 (79.2-81.6) | 81.2 (80.3-82.0) | 82.1 (81.3-82.9) | 81.9 (79.9-83.9) |
| High-income Asia Pacific             | 84.2 (82.3-86.0) | 83.6 (82.5-84.6) | 83.1 (82.2-84.0) | 82.5 (81.7-83.3) | 81.6 (80.0-83.2) |
| High-income western                  | 85.9 (84.2-87.7) | 84.2 (83.3-85.0) | 82.5 (81.9-83.1) | 80.8 (80.2-81.4) | 79.7 (78.5-81.0) |
| Latin America & Caribbean            | 83.3 (79.5-86.7) | 83.8 (81.9-85.7) | 83.8 (82.6-85.0) | 83.2 (82.4-84.1) | 82.2 (80.5-83.8) |
| Oceania                              | 75.6 (71.3-79.9) | 76.1 (73.9-78.4) | 76.6 (74.3-78.9) | 77.0 (75.0-79.1) | 77.9 (74.1-81.8) |
| South Asia                           | 80.5 (75.5-85.7) | 81.1 (78.5-83.6) | 81.4 (79.9-82.9) | 81.9 (80.9-82.9) | 83.2 (81.2-85.1) |
| Sub-Saharan Africa                   | 80.8 (77.8-83.8) | 81.9 (80.3-83.5) | 82.7 (81.5-83.9) | 82.9 (82.1-83.8) | 83.1 (81.6-84.6) |
| <b>55-59 years</b>                   |                  |                  |                  |                  |                  |
| World                                | 82.7 (80.9-84.7) | 83.1 (82.2-84.0) | 83.0 (82.5-83.5) | 82.8 (82.4-83.2) | 82.6 (81.7-83.5) |
| Central & Eastern Europe             | 88.8 (85.9-91.7) | 89.1 (87.8-90.4) | 88.3 (87.2-89.5) | 87.5 (86.4-88.7) | 87.2 (85.1-89.2) |
| Central Asia & MENA                  | 82.4 (78.3-86.4) | 83.0 (80.9-84.9) | 83.2 (82.1-84.3) | 83.2 (82.4-83.9) | 83.3 (81.9-84.7) |

| Mean diastolic blood pressure (mmHg) |                  |                  |                  |                  |                  |
|--------------------------------------|------------------|------------------|------------------|------------------|------------------|
| Super-region (Men)                   | Year             |                  |                  |                  |                  |
|                                      | 1975             | 1985             | 1995             | 2005             | 2015             |
| East & Southeast Asia                | 80.3 (77.0-83.7) | 81.0 (79.7-82.2) | 81.8 (80.9-82.7) | 82.7 (81.9-83.5) | 82.5 (80.5-84.5) |
| High-income Asia Pacific             | 84.6 (82.6-86.5) | 84.1 (83.0-85.1) | 83.5 (82.6-84.4) | 82.9 (82.1-83.7) | 81.9 (80.3-83.6) |
| High-income western                  | 85.9 (84.2-87.7) | 84.2 (83.4-85.1) | 82.9 (82.3-83.5) | 81.0 (80.4-81.6) | 79.6 (78.3-81.0) |
| Latin America & Caribbean            | 83.7 (79.8-87.2) | 84.3 (82.3-86.2) | 84.2 (83.0-85.5) | 83.6 (82.8-84.5) | 82.5 (80.8-84.2) |
| Oceania                              | 75.8 (71.4-80.2) | 76.2 (73.9-78.6) | 76.7 (74.3-79.2) | 77.1 (75.0-79.4) | 78.1 (74.2-82.1) |
| South Asia                           | 80.7 (75.5-86.0) | 81.3 (78.6-83.9) | 81.6 (80.0-83.1) | 82.1 (81.1-83.1) | 83.5 (81.4-85.5) |
| Sub-Saharan Africa                   | 81.3 (78.2-84.4) | 82.4 (80.7-84.0) | 83.2 (82.0-84.4) | 83.5 (82.6-84.4) | 83.6 (82.1-85.2) |
| <b>60-64 years</b>                   |                  |                  |                  |                  |                  |
| World                                | 83.1 (81.3-85.0) | 82.8 (81.9-83.7) | 82.7 (82.2-83.3) | 82.6 (82.2-83.0) | 82.5 (81.5-83.5) |
| Central & Eastern Europe             | 88.7 (85.7-91.7) | 88.9 (87.6-90.3) | 88.2 (87.1-89.4) | 87.5 (86.4-88.6) | 87.1 (85.0-89.2) |
| Central Asia & MENA                  | 82.6 (78.3-86.7) | 83.0 (80.8-85.0) | 83.2 (82.1-84.3) | 83.3 (82.5-84.0) | 83.3 (81.9-84.8) |
| East & Southeast Asia                | 80.4 (77.0-83.9) | 81.0 (79.8-82.3) | 81.9 (80.9-82.8) | 82.8 (82.0-83.7) | 82.6 (80.4-84.8) |
| High-income Asia Pacific             | 84.4 (82.5-86.3) | 83.7 (82.5-84.7) | 83.2 (82.2-84.1) | 82.5 (81.7-83.4) | 82.0 (80.2-83.8) |
| High-income western                  | 85.7 (83.8-87.6) | 83.6 (82.8-84.5) | 82.2 (81.6-82.8) | 80.5 (79.9-81.1) | 79.0 (77.6-80.3) |
| Latin America & Caribbean            | 83.5 (79.5-87.0) | 84.0 (82.0-86.0) | 84.0 (82.7-85.3) | 83.3 (82.5-84.2) | 82.2 (80.5-84.0) |
| Oceania                              | 75.3 (70.8-79.9) | 75.8 (73.3-78.3) | 76.3 (73.7-78.8) | 76.6 (74.3-79.1) | 77.7 (73.6-81.8) |
| South Asia                           | 80.4 (75.1-85.8) | 81.0 (78.3-83.7) | 81.3 (79.7-82.9) | 81.9 (80.8-83.0) | 83.3 (81.1-85.4) |
| Sub-Saharan Africa                   | 81.0 (77.9-84.2) | 82.2 (80.5-83.9) | 83.0 (81.8-84.3) | 83.4 (82.4-84.3) | 83.5 (81.9-85.1) |
| <b>65-69 years</b>                   |                  |                  |                  |                  |                  |
| World                                | 82.5 (80.7-84.4) | 81.8 (80.9-82.7) | 82.1 (81.6-82.7) | 82.0 (81.6-82.5) | 81.6 (80.7-82.6) |
| Central & Eastern Europe             | 88.0 (85.0-91.0) | 88.4 (87.0-89.9) | 87.7 (86.5-89.0) | 87.0 (85.7-88.3) | 86.4 (84.4-88.5) |
| Central Asia & MENA                  | 82.3 (77.9-86.4) | 82.6 (80.3-84.7) | 82.9 (81.6-84.1) | 83.0 (82.2-83.8) | 82.9 (81.4-84.5) |
| East & Southeast Asia                | 79.9 (76.3-83.5) | 80.5 (79.2-81.9) | 81.4 (80.4-82.3) | 82.4 (81.5-83.3) | 82.2 (79.9-84.5) |
| High-income Asia Pacific             | 83.6 (81.7-85.6) | 82.7 (81.6-83.8) | 82.3 (81.3-83.2) | 81.5 (80.6-82.4) | 81.3 (79.3-83.3) |
| High-income western                  | 84.6 (82.7-86.7) | 82.0 (81.1-82.9) | 80.8 (80.2-81.5) | 79.5 (78.8-80.1) | 77.8 (76.4-79.1) |
| Latin America & Caribbean            | 82.7 (78.6-86.4) | 83.2 (81.2-85.2) | 83.2 (81.9-84.5) | 82.5 (81.6-83.4) | 81.4 (79.6-83.1) |
| Oceania                              | 74.3 (69.6-79.1) | 74.9 (72.1-77.6) | 75.3 (72.4-78.1) | 75.7 (73.1-78.4) | 76.7 (72.5-81.1) |
| South Asia                           | 79.7 (74.3-85.3) | 80.4 (77.5-83.2) | 80.7 (79.0-82.4) | 81.3 (80.2-82.4) | 82.7 (80.5-84.9) |
| Sub-Saharan Africa                   | 80.2 (77.0-83.5) | 81.5 (79.7-83.2) | 82.3 (81.0-83.6) | 82.7 (81.6-83.7) | 82.8 (81.1-84.5) |
| <b>70-74 years</b>                   |                  |                  |                  |                  |                  |
| World                                | 81.5 (79.7-83.5) | 81.1 (80.2-82.1) | 80.8 (80.2-81.4) | 80.9 (80.4-81.3) | 80.4 (79.5-81.4) |
| Central & Eastern Europe             | 87.0 (83.8-90.1) | 87.4 (85.9-89.0) | 86.6 (85.3-87.9) | 85.9 (84.6-87.2) | 85.5 (83.4-87.8) |
| Central Asia & MENA                  | 81.5 (76.9-85.9) | 82.0 (79.6-84.2) | 82.1 (80.9-83.4) | 82.3 (81.4-83.2) | 82.2 (80.5-83.8) |
| East & Southeast Asia                | 78.9 (75.2-82.8) | 79.7 (78.2-81.1) | 80.6 (79.6-81.5) | 81.6 (80.7-82.6) | 81.4 (79.0-83.8) |
| High-income Asia Pacific             | 82.5 (80.5-84.5) | 81.5 (80.3-82.6) | 80.8 (79.8-81.9) | 80.1 (79.2-81.1) | 79.9 (77.8-82.1) |
| High-income western                  | 83.2 (81.2-85.4) | 80.9 (80.0-81.9) | 79.1 (78.4-79.8) | 77.8 (77.1-78.4) | 76.0 (74.6-77.5) |
| Latin America & Caribbean            | 81.4 (77.2-85.3) | 82.0 (79.9-84.1) | 82.0 (80.6-83.4) | 81.3 (80.3-82.2) | 80.1 (78.2-81.9) |
| Oceania                              | 73.1 (68.2-78.1) | 73.6 (70.4-76.8) | 74.0 (70.8-77.2) | 74.4 (71.4-77.4) | 75.5 (70.9-80.1) |
| South Asia                           | 78.9 (73.2-84.7) | 79.6 (76.6-82.5) | 79.9 (78.2-81.7) | 80.5 (79.3-81.7) | 82.0 (79.8-84.2) |
| Sub-Saharan Africa                   | 78.9 (75.5-82.4) | 80.2 (78.4-82.1) | 81.2 (79.7-82.6) | 81.5 (80.4-82.6) | 81.7 (80.0-83.5) |
| <b>75-79 years</b>                   |                  |                  |                  |                  |                  |
| World                                | 80.4 (78.5-82.4) | 80.0 (79.0-81.0) | 79.3 (78.7-79.9) | 79.5 (79.1-80.0) | 79.2 (78.2-80.2) |
| Central & Eastern Europe             | 85.9 (82.5-89.3) | 86.4 (84.6-88.2) | 85.8 (84.2-87.2) | 85.0 (83.4-86.6) | 84.6 (82.1-87.2) |
| Central Asia & MENA                  | 80.8 (75.8-85.4) | 81.2 (78.6-83.6) | 81.4 (80.0-82.9) | 81.7 (80.6-82.7) | 81.6 (79.8-83.3) |
| East & Southeast Asia                | 77.8 (73.8-81.8) | 78.6 (77.1-80.1) | 79.6 (78.5-80.6) | 80.6 (79.6-81.6) | 80.4 (77.8-83.0) |
| High-income Asia Pacific             | 81.1 (78.9-83.2) | 80.1 (78.8-81.3) | 79.3 (78.3-80.4) | 78.6 (77.5-79.7) | 78.3 (76.1-80.7) |

| Mean diastolic blood pressure (mmHg) |                  |                  |                  |                  |                  |
|--------------------------------------|------------------|------------------|------------------|------------------|------------------|
| Super-region (Men)                   | Year             |                  |                  |                  |                  |
|                                      | 1975             | 1985             | 1995             | 2005             | 2015             |
| High-income western                  | 81.6 (79.5-83.8) | 79.3 (78.3-80.3) | 76.7 (76.0-77.5) | 75.8 (75.1-76.5) | 74.2 (72.7-75.8) |
| Latin America & Caribbean            | 80.1 (75.5-84.3) | 80.7 (78.5-83.0) | 80.6 (79.1-82.1) | 79.9 (78.9-81.0) | 78.6 (76.7-80.6) |
| Oceania                              | 71.9 (66.6-77.2) | 72.2 (68.6-75.8) | 72.7 (69.0-76.2) | 73.0 (69.4-76.5) | 74.1 (69.0-79.2) |
| South Asia                           | 78.2 (72.1-84.4) | 78.9 (75.8-82.0) | 79.3 (77.4-81.1) | 79.9 (78.6-81.2) | 81.5 (79.1-83.8) |
| Sub-Saharan Africa                   | 77.6 (74.0-81.2) | 78.9 (76.8-80.9) | 79.9 (78.2-81.5) | 80.4 (79.1-81.7) | 80.6 (78.7-82.6) |
| <b>80-84 years</b>                   |                  |                  |                  |                  |                  |
| World                                | 79.5 (77.6-81.5) | 78.9 (77.8-79.9) | 78.4 (77.8-79.1) | 78.0 (77.5-78.5) | 77.7 (76.6-78.8) |
| Central & Eastern Europe             | 85.5 (81.7-89.5) | 85.5 (83.5-87.6) | 84.9 (83.1-86.7) | 83.8 (82.1-85.5) | 83.4 (80.9-86.0) |
| Central Asia & MENA                  | 80.3 (75.0-85.3) | 80.6 (77.7-83.2) | 80.8 (79.2-82.5) | 81.1 (79.9-82.3) | 80.9 (79.0-82.9) |
| East & Southeast Asia                | 76.6 (72.3-80.9) | 77.4 (75.8-79.1) | 78.5 (77.3-79.6) | 79.6 (78.5-80.6) | 79.4 (76.6-82.1) |
| High-income Asia Pacific             | 79.8 (77.5-82.1) | 78.8 (77.4-80.0) | 77.9 (76.8-79.1) | 77.1 (76.0-78.3) | 77.1 (74.6-79.6) |
| High-income western                  | 80.1 (77.8-82.4) | 77.8 (76.7-78.9) | 75.8 (75.0-76.6) | 74.0 (73.2-74.8) | 72.5 (70.9-74.1) |
| Latin America & Caribbean            | 78.8 (73.8-83.4) | 79.5 (77.1-82.0) | 79.5 (77.8-81.1) | 78.6 (77.4-79.9) | 77.3 (75.1-79.4) |
| Oceania                              | 70.7 (64.9-76.6) | 70.9 (66.7-75.0) | 71.3 (67.1-75.5) | 71.8 (67.6-75.8) | 72.8 (67.2-78.5) |
| South Asia                           | 77.9 (71.5-84.4) | 78.6 (75.2-81.9) | 79.0 (77.0-81.0) | 79.7 (78.3-81.1) | 81.3 (78.8-83.9) |
| Sub-Saharan Africa                   | 76.3 (72.5-80.2) | 77.6 (75.3-79.9) | 78.7 (76.7-80.6) | 79.2 (77.6-80.8) | 79.6 (77.3-81.8) |
| <b>85+ years</b>                     |                  |                  |                  |                  |                  |
| World                                | 79.0 (76.8-81.3) | 77.8 (76.6-79.0) | 77.2 (76.4-78.0) | 76.6 (75.9-77.2) | 76.0 (74.8-77.2) |
| Central & Eastern Europe             | 85.3 (80.9-89.9) | 85.4 (82.8-88.1) | 84.4 (82.1-86.8) | 83.3 (81.1-85.5) | 82.8 (79.6-86.0) |
| Central Asia & MENA                  | 80.2 (73.9-86.0) | 80.3 (76.6-83.7) | 80.4 (78.1-82.6) | 81.0 (79.3-82.7) | 81.1 (78.8-83.5) |
| East & Southeast Asia                | 75.2 (70.6-79.9) | 76.2 (74.3-78.1) | 77.4 (75.9-78.7) | 78.6 (77.3-79.9) | 78.2 (75.2-81.1) |
| High-income Asia Pacific             | 78.9 (76.2-81.5) | 77.6 (76.0-79.1) | 76.7 (75.2-78.1) | 75.8 (74.3-77.2) | 75.9 (73.0-78.9) |
| High-income western                  | 79.0 (76.4-81.6) | 76.0 (74.7-77.3) | 74.0 (73.0-75.0) | 71.8 (70.9-72.7) | 70.4 (68.5-72.2) |
| Latin America & Caribbean            | 77.7 (72.2-82.8) | 78.6 (75.8-81.4) | 78.6 (76.6-80.5) | 77.6 (76.0-79.2) | 76.0 (73.4-78.5) |
| Oceania                              | 68.5 (61.0-76.0) | 69.5 (64.3-74.7) | 70.0 (64.5-75.3) | 70.6 (65.3-75.6) | 71.7 (65.0-78.5) |
| South Asia                           | 78.4 (71.1-85.8) | 79.2 (75.4-83.0) | 79.7 (77.2-82.1) | 80.4 (78.6-82.2) | 82.2 (79.1-85.2) |
| Sub-Saharan Africa                   | 75.5 (71.2-79.8) | 76.6 (73.9-79.3) | 77.8 (75.5-80.2) | 78.4 (75.9-80.7) | 79.3 (76.4-82.1) |

| Mean diastolic blood pressure (mmHg) |                  |                  |                  |                  |                  |
|--------------------------------------|------------------|------------------|------------------|------------------|------------------|
| Super-region (Women)                 | Year             |                  |                  |                  |                  |
|                                      | 1975             | 1985             | 1995             | 2005             | 2015             |
| <b>18-19 years</b>                   |                  |                  |                  |                  |                  |
| World                                | 70.7 (69.1-72.2) | 70.5 (69.7-71.3) | 70.8 (70.3-71.3) | 71.0 (70.6-71.4) | 71.4 (70.7-72.0) |
| Central & Eastern Europe             | 74.8 (72.2-77.6) | 74.1 (72.9-75.4) | 73.0 (72.0-74.0) | 72.0 (70.9-73.1) | 71.5 (69.9-73.1) |
| Central Asia & MENA                  | 70.9 (67.3-74.4) | 71.2 (69.4-72.9) | 71.4 (70.3-72.4) | 71.2 (70.4-72.1) | 70.9 (69.6-72.3) |
| East & Southeast Asia                | 69.4 (66.9-72.1) | 69.4 (68.3-70.5) | 69.7 (68.9-70.5) | 70.1 (69.4-70.8) | 70.4 (69.1-71.9) |
| High-income Asia Pacific             | 68.1 (66.3-70.0) | 67.2 (66.2-68.2) | 66.3 (65.5-67.2) | 65.4 (64.7-66.1) | 64.7 (63.5-66.0) |
| High-income western                  | 71.6 (70.2-73.1) | 69.9 (69.1-70.6) | 68.1 (67.5-68.6) | 66.8 (66.2-67.4) | 66.2 (65.1-67.4) |
| Latin America & Caribbean            | 71.1 (67.9-74.2) | 71.3 (69.7-72.9) | 70.9 (69.9-71.9) | 70.0 (69.3-70.7) | 69.0 (67.8-70.3) |
| Oceania                              | 67.7 (64.0-71.4) | 68.5 (66.4-70.6) | 69.7 (67.4-72.0) | 70.9 (68.7-73.3) | 72.4 (68.8-76.0) |
| South Asia                           | 71.4 (67.1-75.5) | 72.3 (70.2-74.3) | 72.9 (71.7-74.2) | 73.4 (72.5-74.3) | 74.3 (72.8-75.8) |
| Sub-Saharan Africa                   | 68.6 (65.9-71.2) | 69.9 (68.5-71.3) | 71.0 (70.0-72.1) | 71.8 (71.0-72.7) | 72.4 (71.1-73.8) |
| <b>20-24 years</b>                   |                  |                  |                  |                  |                  |
| World                                | 71.2 (69.6-72.8) | 71.1 (70.3-71.9) | 71.2 (70.7-71.6) | 71.4 (71.1-71.8) | 71.7 (71.0-72.4) |
| Central & Eastern Europe             | 75.5 (72.8-78.2) | 75.0 (73.8-76.2) | 73.6 (72.7-74.5) | 72.6 (71.6-73.6) | 72.0 (70.4-73.7) |
| Central Asia & MENA                  | 71.4 (67.7-74.9) | 71.7 (69.9-73.5) | 71.9 (70.9-72.9) | 71.7 (71.0-72.5) | 71.4 (70.2-72.7) |
| East & Southeast Asia                | 69.8 (67.2-72.5) | 69.7 (68.7-70.8) | 70.0 (69.3-70.8) | 70.5 (69.9-71.1) | 70.7 (69.2-72.2) |
| High-income Asia Pacific             | 68.8 (67.2-70.5) | 68.0 (66.9-69.0) | 67.1 (66.3-67.9) | 66.2 (65.5-66.8) | 65.4 (64.2-66.7) |
| High-income western                  | 72.6 (71.1-74.1) | 70.7 (69.9-71.4) | 69.0 (68.4-69.5) | 67.6 (67.1-68.1) | 67.0 (65.8-68.1) |
| Latin America & Caribbean            | 71.8 (68.5-74.9) | 71.9 (70.3-73.5) | 71.7 (70.7-72.6) | 70.7 (70.0-71.3) | 69.6 (68.4-70.9) |
| Oceania                              | 67.6 (63.9-71.3) | 68.4 (66.5-70.3) | 69.7 (67.5-71.8) | 70.8 (68.8-73.0) | 72.3 (68.8-75.9) |
| South Asia                           | 71.8 (67.4-76.0) | 72.7 (70.6-74.7) | 73.3 (72.1-74.5) | 73.8 (73.0-74.7) | 74.8 (73.3-76.2) |
| Sub-Saharan Africa                   | 69.3 (66.5-71.9) | 70.6 (69.2-71.9) | 71.7 (70.7-72.8) | 72.5 (71.7-73.3) | 73.1 (71.8-74.5) |
| <b>25-29 years</b>                   |                  |                  |                  |                  |                  |
| World                                | 72.6 (70.9-74.2) | 72.4 (71.6-73.3) | 72.3 (71.9-72.8) | 72.6 (72.3-73.0) | 72.8 (72.1-73.5) |
| Central & Eastern Europe             | 77.1 (74.4-79.9) | 76.5 (75.3-77.7) | 75.1 (74.2-76.0) | 74.0 (73.1-75.0) | 73.4 (71.7-75.1) |
| Central Asia & MENA                  | 72.8 (68.9-76.5) | 73.1 (71.2-74.8) | 73.3 (72.3-74.2) | 73.1 (72.3-73.8) | 72.7 (71.4-74.0) |
| East & Southeast Asia                | 70.9 (68.2-73.8) | 70.8 (69.7-72.0) | 71.1 (70.4-71.8) | 71.7 (71.1-72.3) | 71.7 (70.2-73.4) |
| High-income Asia Pacific             | 70.6 (69.0-72.2) | 69.6 (68.5-70.7) | 68.7 (67.9-69.6) | 67.7 (67.0-68.3) | 66.9 (65.6-68.3) |
| High-income western                  | 74.3 (72.7-75.8) | 72.2 (71.5-72.9) | 70.6 (70.1-71.1) | 69.1 (68.6-69.6) | 68.4 (67.3-69.6) |
| Latin America & Caribbean            | 73.3 (69.9-76.5) | 73.4 (71.7-75.1) | 73.1 (72.1-74.0) | 72.1 (71.4-72.7) | 71.0 (69.7-72.3) |
| Oceania                              | 68.0 (64.2-71.8) | 68.9 (67.1-70.6) | 70.1 (68.0-72.1) | 71.3 (69.3-73.3) | 72.8 (69.3-76.4) |
| South Asia                           | 72.7 (68.2-77.1) | 73.7 (71.5-75.8) | 74.3 (73.1-75.6) | 74.8 (74.0-75.7) | 75.8 (74.3-77.4) |
| Sub-Saharan Africa                   | 70.6 (67.7-73.3) | 72.0 (70.6-73.4) | 73.2 (72.2-74.2) | 74.0 (73.2-74.8) | 74.6 (73.2-75.9) |
| <b>30-34 years</b>                   |                  |                  |                  |                  |                  |
| World                                | 74.3 (72.6-76.0) | 74.1 (73.3-74.9) | 74.0 (73.5-74.5) | 74.1 (73.7-74.4) | 74.4 (73.7-75.2) |
| Central & Eastern Europe             | 79.3 (76.4-82.2) | 78.7 (77.5-79.9) | 77.3 (76.3-78.2) | 76.1 (75.1-77.1) | 75.4 (73.6-77.2) |
| Central Asia & MENA                  | 74.5 (70.4-78.4) | 74.9 (72.9-76.7) | 75.1 (74.1-76.1) | 74.9 (74.1-75.6) | 74.3 (73.0-75.6) |
| East & Southeast Asia                | 72.5 (69.7-75.5) | 72.3 (71.2-73.5) | 72.7 (71.9-73.4) | 73.2 (72.5-73.9) | 73.5 (71.9-75.2) |
| High-income Asia Pacific             | 72.9 (71.2-74.6) | 71.6 (70.6-72.6) | 70.8 (69.9-71.7) | 69.7 (69.0-70.3) | 68.8 (67.5-70.3) |
| High-income western                  | 76.4 (74.8-78.1) | 74.2 (73.5-75.0) | 72.4 (71.8-72.9) | 70.9 (70.4-71.5) | 70.2 (69.0-71.4) |
| Latin America & Caribbean            | 75.2 (71.6-78.6) | 75.3 (73.5-77.1) | 74.9 (73.9-75.9) | 73.9 (73.2-74.6) | 72.7 (71.3-74.2) |
| Oceania                              | 68.9 (64.9-73.0) | 69.8 (67.9-71.6) | 71.0 (69.0-73.0) | 72.2 (70.2-74.3) | 73.8 (70.1-77.6) |
| South Asia                           | 74.0 (69.2-78.6) | 75.0 (72.6-77.3) | 75.7 (74.4-77.0) | 76.2 (75.3-77.1) | 77.2 (75.6-78.9) |
| Sub-Saharan Africa                   | 72.4 (69.3-75.3) | 73.8 (72.3-75.3) | 75.1 (74.1-76.2) | 75.9 (75.1-76.7) | 76.5 (75.1-77.9) |
| <b>35-39 years</b>                   |                  |                  |                  |                  |                  |
| World                                | 76.5 (74.7-78.3) | 76.1 (75.2-76.9) | 75.9 (75.4-76.4) | 75.8 (75.4-76.2) | 76.2 (75.4-77.0) |

| Mean diastolic blood pressure (mmHg) |                  |                  |                  |                  |                  |
|--------------------------------------|------------------|------------------|------------------|------------------|------------------|
| Super-region (Women)                 | Year             |                  |                  |                  |                  |
|                                      | 1975             | 1985             | 1995             | 2005             | 2015             |
| Central & Eastern Europe             | 82.0 (78.9-85.2) | 81.1 (79.9-82.4) | 79.6 (78.7-80.6) | 78.5 (77.4-79.5) | 77.7 (75.8-79.6) |
| Central Asia & MENA                  | 76.7 (72.4-80.8) | 77.0 (74.9-78.9) | 77.2 (76.1-78.2) | 76.9 (76.2-77.7) | 76.3 (74.9-77.7) |
| East & Southeast Asia                | 74.4 (71.3-77.6) | 74.2 (73.0-75.4) | 74.6 (73.7-75.4) | 75.1 (74.4-75.8) | 75.4 (73.7-77.2) |
| High-income Asia Pacific             | 75.3 (73.6-77.2) | 74.0 (73.0-74.9) | 73.0 (72.1-74.0) | 71.9 (71.2-72.6) | 71.0 (69.5-72.5) |
| High-income western                  | 78.8 (77.0-80.6) | 76.3 (75.5-77.1) | 74.2 (73.6-74.8) | 72.9 (72.3-73.4) | 72.0 (70.8-73.3) |
| Latin America & Caribbean            | 77.3 (73.5-80.9) | 77.4 (75.5-79.2) | 77.0 (75.9-78.0) | 75.8 (75.1-76.6) | 74.6 (73.1-76.1) |
| Oceania                              | 70.0 (65.7-74.3) | 70.9 (68.9-72.8) | 72.2 (70.0-74.2) | 73.5 (71.5-75.5) | 75.1 (71.2-78.9) |
| South Asia                           | 75.4 (70.3-80.3) | 76.4 (74.0-78.9) | 77.2 (75.8-78.5) | 77.7 (76.8-78.6) | 78.8 (77.0-80.5) |
| Sub-Saharan Africa                   | 74.2 (71.0-77.3) | 75.8 (74.2-77.3) | 77.2 (76.1-78.3) | 78.0 (77.2-78.8) | 78.6 (77.1-80.0) |
| <b>40-44 years</b>                   |                  |                  |                  |                  |                  |
| World                                | 78.4 (76.6-80.3) | 78.0 (77.1-78.9) | 77.8 (77.3-78.3) | 77.7 (77.3-78.1) | 77.8 (76.9-78.7) |
| Central & Eastern Europe             | 84.5 (81.3-87.8) | 83.7 (82.4-85.1) | 82.2 (81.1-83.2) | 80.9 (79.8-82.1) | 80.1 (78.1-82.1) |
| Central Asia & MENA                  | 78.6 (74.0-83.0) | 79.0 (76.8-81.1) | 79.3 (78.2-80.4) | 79.1 (78.3-79.8) | 78.4 (76.9-79.8) |
| East & Southeast Asia                | 76.2 (73.0-79.6) | 76.2 (74.9-77.5) | 76.4 (75.5-77.2) | 77.0 (76.3-77.7) | 77.2 (75.3-79.2) |
| High-income Asia Pacific             | 77.9 (76.0-79.7) | 76.4 (75.4-77.4) | 75.3 (74.4-76.2) | 74.1 (73.3-74.8) | 73.1 (71.6-74.8) |
| High-income western                  | 80.9 (79.0-82.8) | 78.5 (77.7-79.3) | 76.1 (75.5-76.7) | 74.6 (74.0-75.2) | 73.8 (72.5-75.2) |
| Latin America & Caribbean            | 79.3 (75.3-83.2) | 79.4 (77.4-81.4) | 79.0 (77.8-80.1) | 77.8 (77.0-78.6) | 76.5 (74.9-78.1) |
| Oceania                              | 71.1 (66.6-75.6) | 72.0 (69.9-74.1) | 73.3 (71.1-75.5) | 74.8 (72.7-76.9) | 76.4 (72.3-80.5) |
| South Asia                           | 76.8 (71.4-82.1) | 77.9 (75.3-80.4) | 78.7 (77.2-80.1) | 79.2 (78.3-80.2) | 80.3 (78.5-82.2) |
| Sub-Saharan Africa                   | 76.1 (72.7-79.3) | 77.8 (76.0-79.4) | 79.2 (78.0-80.4) | 80.1 (79.2-81.0) | 80.6 (79.1-82.2) |
| <b>45-49 years</b>                   |                  |                  |                  |                  |                  |
| World                                | 80.6 (78.7-82.5) | 80.1 (79.2-81.0) | 79.5 (79.0-80.0) | 79.4 (79.0-79.8) | 79.4 (78.4-80.4) |
| Central & Eastern Europe             | 87.1 (83.7-90.7) | 86.4 (84.9-87.9) | 84.5 (83.4-85.5) | 83.2 (82.0-84.4) | 82.4 (80.3-84.5) |
| Central Asia & MENA                  | 80.6 (75.8-85.2) | 81.0 (78.6-83.2) | 81.2 (80.1-82.4) | 81.0 (80.2-81.8) | 80.3 (78.7-81.8) |
| East & Southeast Asia                | 78.0 (74.6-81.6) | 77.9 (76.5-79.3) | 78.2 (77.3-79.1) | 78.8 (78.0-79.5) | 79.0 (76.9-81.2) |
| High-income Asia Pacific             | 80.1 (78.2-82.1) | 78.5 (77.4-79.6) | 77.3 (76.4-78.2) | 76.0 (75.2-76.8) | 75.0 (73.4-76.7) |
| High-income western                  | 82.8 (80.8-84.8) | 80.5 (79.7-81.4) | 77.8 (77.2-78.4) | 76.0 (75.4-76.6) | 75.3 (74.0-76.8) |
| Latin America & Caribbean            | 81.2 (76.9-85.2) | 81.3 (79.1-83.3) | 80.7 (79.6-81.9) | 79.5 (78.7-80.3) | 78.1 (76.4-79.8) |
| Oceania                              | 72.0 (67.1-76.8) | 72.9 (70.6-75.2) | 74.3 (72.0-76.7) | 75.9 (73.7-78.1) | 77.6 (73.4-81.9) |
| South Asia                           | 78.0 (72.2-83.5) | 79.1 (76.4-81.8) | 79.9 (78.4-81.5) | 80.6 (79.6-81.6) | 81.7 (79.8-83.7) |
| Sub-Saharan Africa                   | 77.7 (74.1-81.1) | 79.5 (77.7-81.2) | 81.0 (79.7-82.2) | 82.0 (81.1-82.9) | 82.5 (80.9-84.2) |
| <b>50-54 years</b>                   |                  |                  |                  |                  |                  |
| World                                | 82.1 (80.2-84.1) | 81.4 (80.4-82.3) | 80.9 (80.3-81.4) | 80.7 (80.2-81.1) | 80.6 (79.7-81.7) |
| Central & Eastern Europe             | 89.1 (85.6-92.8) | 88.3 (86.8-89.8) | 86.4 (85.3-87.6) | 85.1 (83.8-86.4) | 84.2 (82.0-86.6) |
| Central Asia & MENA                  | 82.1 (77.1-86.9) | 82.5 (80.1-84.8) | 82.8 (81.7-84.0) | 82.6 (81.8-83.4) | 81.9 (80.3-83.5) |
| East & Southeast Asia                | 79.4 (75.8-83.2) | 79.3 (77.9-80.7) | 79.7 (78.8-80.6) | 80.2 (79.4-81.0) | 80.4 (78.3-82.7) |
| High-income Asia Pacific             | 82.0 (80.0-84.0) | 80.3 (79.2-81.4) | 79.0 (78.0-79.9) | 77.6 (76.7-78.4) | 76.4 (74.7-78.2) |
| High-income western                  | 84.3 (82.2-86.4) | 81.8 (80.9-82.7) | 79.3 (78.6-79.9) | 77.2 (76.5-77.8) | 76.4 (74.9-77.9) |
| Latin America & Caribbean            | 82.6 (78.1-86.8) | 82.6 (80.4-84.7) | 82.1 (80.9-83.3) | 80.8 (80.0-81.7) | 79.4 (77.6-81.2) |
| Oceania                              | 72.6 (67.5-77.6) | 73.6 (71.2-76.0) | 75.1 (72.6-77.6) | 76.6 (74.2-78.9) | 78.6 (74.3-83.0) |
| South Asia                           | 78.8 (72.8-84.7) | 80.0 (77.1-82.9) | 80.9 (79.3-82.5) | 81.6 (80.5-82.6) | 82.8 (80.7-84.9) |
| Sub-Saharan Africa                   | 78.9 (75.1-82.6) | 80.7 (78.9-82.6) | 82.4 (81.1-83.7) | 83.4 (82.5-84.4) | 84.0 (82.3-85.7) |
| <b>55-59 years</b>                   |                  |                  |                  |                  |                  |
| World                                | 82.7 (80.6-84.8) | 82.6 (81.6-83.6) | 82.1 (81.5-82.6) | 81.4 (81.0-81.9) | 81.4 (80.5-82.5) |
| Central & Eastern Europe             | 90.8 (87.0-94.8) | 90.0 (88.4-91.6) | 88.1 (86.8-89.3) | 86.4 (85.1-87.7) | 85.5 (83.2-87.9) |
| Central Asia & MENA                  | 83.1 (77.8-88.2) | 83.6 (81.0-86.0) | 83.9 (82.6-85.2) | 83.7 (82.8-84.5) | 82.9 (81.3-84.6) |

| Mean diastolic blood pressure (mmHg) |                  |                  |                  |                  |                  |
|--------------------------------------|------------------|------------------|------------------|------------------|------------------|
| Super-region (Women)                 | Year             |                  |                  |                  |                  |
|                                      | 1975             | 1985             | 1995             | 2005             | 2015             |
| East & Southeast Asia                | 80.4 (76.6-84.4) | 80.2 (78.8-81.7) | 80.6 (79.7-81.6) | 81.2 (80.4-82.1) | 81.4 (79.2-83.7) |
| High-income Asia Pacific             | 83.2 (81.1-85.3) | 81.5 (80.3-82.6) | 80.0 (79.0-81.1) | 78.6 (77.7-79.5) | 77.4 (75.6-79.3) |
| High-income western                  | 84.8 (82.7-87.0) | 82.5 (81.6-83.5) | 80.3 (79.7-81.0) | 77.8 (77.2-78.5) | 76.8 (75.3-78.5) |
| Latin America & Caribbean            | 83.4 (78.8-87.8) | 83.5 (81.2-85.7) | 82.9 (81.6-84.3) | 81.6 (80.7-82.5) | 80.1 (78.3-82.0) |
| Oceania                              | 72.7 (67.3-78.0) | 73.7 (71.1-76.3) | 75.2 (72.5-77.9) | 76.9 (74.3-79.4) | 79.0 (74.5-83.6) |
| South Asia                           | 79.3 (72.9-85.4) | 80.6 (77.5-83.5) | 81.5 (79.8-83.2) | 82.2 (81.0-83.3) | 83.4 (81.2-85.7) |
| Sub-Saharan Africa                   | 79.7 (75.7-83.5) | 81.5 (79.6-83.5) | 83.3 (81.9-84.6) | 84.3 (83.3-85.3) | 85.0 (83.2-86.8) |
| <b>60-64 years</b>                   |                  |                  |                  |                  |                  |
| World                                | 83.8 (81.7-85.9) | 82.9 (81.9-83.9) | 82.2 (81.6-82.8) | 81.6 (81.2-82.1) | 81.6 (80.6-82.7) |
| Central & Eastern Europe             | 91.7 (87.7-95.8) | 90.6 (88.9-92.3) | 88.7 (87.4-89.9) | 87.1 (85.7-88.4) | 86.2 (83.8-88.7) |
| Central Asia & MENA                  | 83.7 (78.3-88.9) | 84.0 (81.3-86.5) | 84.4 (83.1-85.7) | 84.1 (83.2-85.1) | 83.3 (81.5-85.0) |
| East & Southeast Asia                | 80.7 (76.8-84.9) | 80.6 (79.0-82.1) | 80.9 (79.9-82.0) | 81.6 (80.7-82.5) | 81.7 (79.3-84.2) |
| High-income Asia Pacific             | 83.7 (81.6-85.9) | 81.9 (80.7-83.1) | 80.4 (79.4-81.5) | 78.9 (77.9-79.9) | 77.9 (76.0-80.0) |
| High-income western                  | 85.5 (83.2-87.8) | 82.8 (81.8-83.7) | 80.3 (79.6-81.0) | 78.0 (77.3-78.7) | 76.7 (75.1-78.4) |
| Latin America & Caribbean            | 83.7 (78.9-88.2) | 83.7 (81.3-86.0) | 83.1 (81.7-84.5) | 81.7 (80.8-82.6) | 80.2 (78.3-82.1) |
| Oceania                              | 72.2 (66.5-77.8) | 73.3 (70.5-76.1) | 74.9 (72.0-77.8) | 76.6 (73.9-79.3) | 78.7 (74.0-83.6) |
| South Asia                           | 79.3 (72.7-85.6) | 80.6 (77.4-83.6) | 81.5 (79.8-83.3) | 82.3 (81.1-83.4) | 83.6 (81.3-85.9) |
| Sub-Saharan Africa                   | 79.7 (75.6-83.7) | 81.7 (79.6-83.7) | 83.4 (82.0-84.8) | 84.6 (83.5-85.6) | 85.3 (83.4-87.1) |
| <b>65-69 years</b>                   |                  |                  |                  |                  |                  |
| World                                | 83.8 (81.7-85.9) | 82.3 (81.3-83.3) | 82.1 (81.5-82.7) | 81.6 (81.1-82.1) | 81.1 (80.0-82.1) |
| Central & Eastern Europe             | 91.8 (87.7-96.0) | 91.0 (89.2-92.8) | 88.9 (87.5-90.3) | 87.3 (85.8-88.9) | 86.1 (83.7-88.6) |
| Central Asia & MENA                  | 83.5 (77.9-88.9) | 83.9 (81.1-86.5) | 84.2 (82.8-85.7) | 84.0 (83.0-85.1) | 83.2 (81.3-85.0) |
| East & Southeast Asia                | 80.5 (76.4-84.8) | 80.4 (78.8-81.9) | 80.7 (79.7-81.8) | 81.4 (80.4-82.3) | 81.6 (79.1-84.1) |
| High-income Asia Pacific             | 83.5 (81.3-85.8) | 81.6 (80.4-82.8) | 80.1 (79.0-81.2) | 78.5 (77.5-79.5) | 77.7 (75.6-80.0) |
| High-income western                  | 85.2 (82.8-87.6) | 81.7 (80.7-82.7) | 79.7 (79.0-80.4) | 77.7 (77.0-78.4) | 76.2 (74.5-77.9) |
| Latin America & Caribbean            | 83.3 (78.4-88.0) | 83.3 (80.8-85.7) | 82.7 (81.3-84.2) | 81.3 (80.3-82.2) | 79.7 (77.7-81.6) |
| Oceania                              | 71.1 (65.1-77.0) | 72.3 (69.2-75.4) | 73.9 (70.8-77.1) | 75.7 (72.7-78.7) | 77.9 (73.0-83.0) |
| South Asia                           | 78.9 (72.1-85.5) | 80.2 (76.9-83.4) | 81.2 (79.4-83.0) | 81.9 (80.7-83.1) | 83.3 (81.0-85.7) |
| Sub-Saharan Africa                   | 79.2 (74.9-83.3) | 81.3 (79.1-83.4) | 83.0 (81.6-84.5) | 84.2 (83.1-85.3) | 84.9 (83.0-86.9) |
| <b>70-74 years</b>                   |                  |                  |                  |                  |                  |
| World                                | 83.4 (81.3-85.6) | 82.4 (81.3-83.4) | 81.3 (80.7-81.9) | 80.8 (80.2-81.3) | 80.3 (79.2-81.4) |
| Central & Eastern Europe             | 91.6 (87.3-96.0) | 90.7 (88.8-92.7) | 88.4 (86.9-89.9) | 86.8 (85.2-88.3) | 85.8 (83.2-88.4) |
| Central Asia & MENA                  | 83.0 (77.2-88.5) | 83.5 (80.5-86.2) | 83.8 (82.3-85.3) | 83.6 (82.6-84.7) | 82.6 (80.7-84.5) |
| East & Southeast Asia                | 80.0 (75.7-84.5) | 79.8 (78.2-81.5) | 80.2 (79.1-81.3) | 80.9 (79.9-81.8) | 81.0 (78.6-83.7) |
| High-income Asia Pacific             | 82.9 (80.7-85.3) | 80.9 (79.7-82.2) | 79.3 (78.2-80.4) | 77.7 (76.6-78.7) | 76.9 (74.7-79.3) |
| High-income western                  | 84.6 (82.1-87.2) | 81.5 (80.5-82.6) | 78.9 (78.1-79.6) | 76.8 (76.1-77.5) | 75.2 (73.5-77.0) |
| Latin America & Caribbean            | 82.6 (77.4-87.5) | 82.6 (80.0-85.1) | 82.0 (80.5-83.5) | 80.4 (79.4-81.5) | 78.8 (76.7-80.8) |
| Oceania                              | 69.9 (63.6-76.1) | 71.0 (67.5-74.5) | 72.6 (69.2-76.2) | 74.5 (71.2-77.8) | 76.9 (71.8-82.2) |
| South Asia                           | 78.3 (71.4-85.2) | 79.7 (76.3-83.0) | 80.7 (78.9-82.6) | 81.5 (80.2-82.8) | 82.9 (80.5-85.4) |
| Sub-Saharan Africa                   | 78.3 (73.9-82.5) | 80.4 (78.2-82.6) | 82.3 (80.7-83.8) | 83.4 (82.2-84.6) | 84.3 (82.2-86.3) |
| <b>75-79 years</b>                   |                  |                  |                  |                  |                  |
| World                                | 82.8 (80.7-85.0) | 81.8 (80.7-82.8) | 80.1 (79.5-80.8) | 79.9 (79.4-80.4) | 79.6 (78.5-80.7) |
| Central & Eastern Europe             | 91.1 (86.7-95.7) | 90.3 (88.2-92.4) | 88.1 (86.4-89.9) | 86.3 (84.5-88.1) | 85.3 (82.5-88.2) |
| Central Asia & MENA                  | 82.4 (76.3-88.2) | 83.0 (79.8-85.9) | 83.3 (81.6-84.9) | 83.1 (81.9-84.4) | 82.3 (80.2-84.3) |
| East & Southeast Asia                | 79.4 (75.0-84.0) | 79.2 (77.5-80.9) | 79.6 (78.4-80.8) | 80.3 (79.2-81.3) | 80.4 (77.8-83.2) |
| High-income Asia Pacific             | 82.1 (79.7-84.5) | 80.0 (78.7-81.3) | 78.3 (77.1-79.5) | 76.7 (75.5-77.8) | 75.8 (73.5-78.3) |

| Mean diastolic blood pressure (mmHg) |                  |                  |                  |                  |                  |
|--------------------------------------|------------------|------------------|------------------|------------------|------------------|
| Super-region (Women)                 | Year             |                  |                  |                  |                  |
|                                      | 1975             | 1985             | 1995             | 2005             | 2015             |
| High-income western                  | 83.7 (81.1-86.3) | 80.6 (79.5-81.7) | 77.1 (76.3-77.9) | 75.6 (74.8-76.4) | 74.2 (72.4-76.1) |
| Latin America & Caribbean            | 81.9 (76.4-87.1) | 81.8 (79.1-84.4) | 81.1 (79.5-82.7) | 79.6 (78.5-80.7) | 77.9 (75.7-80.0) |
| Oceania                              | 68.7 (62.1-75.2) | 69.6 (65.6-73.6) | 71.4 (67.5-75.3) | 73.2 (69.4-77.0) | 75.7 (70.1-81.4) |
| South Asia                           | 77.9 (70.7-85.1) | 79.4 (75.8-82.8) | 80.4 (78.4-82.4) | 81.2 (79.9-82.6) | 82.7 (80.2-85.3) |
| Sub-Saharan Africa                   | 77.4 (72.8-81.7) | 79.5 (77.2-81.7) | 81.4 (79.8-83.1) | 82.6 (81.3-83.9) | 83.5 (81.4-85.6) |
| <b>80-84 years</b>                   |                  |                  |                  |                  |                  |
| World                                | 82.5 (80.3-84.8) | 81.2 (80.1-82.3) | 79.9 (79.2-80.6) | 78.7 (78.2-79.3) | 78.5 (77.3-79.6) |
| Central & Eastern Europe             | 90.9 (86.2-95.9) | 90.0 (87.7-92.3) | 87.7 (85.8-89.6) | 85.6 (83.7-87.5) | 84.5 (81.6-87.4) |
| Central Asia & MENA                  | 82.1 (75.7-88.2) | 82.5 (79.0-85.7) | 82.9 (81.0-84.9) | 82.7 (81.3-84.1) | 81.7 (79.5-83.8) |
| East & Southeast Asia                | 78.9 (74.3-83.8) | 78.8 (77.0-80.6) | 79.1 (77.9-80.4) | 79.9 (78.8-80.9) | 80.0 (77.2-82.9) |
| High-income Asia Pacific             | 81.4 (78.9-83.8) | 79.1 (77.8-80.5) | 77.3 (76.1-78.6) | 75.6 (74.4-76.8) | 74.9 (72.4-77.5) |
| High-income western                  | 82.8 (80.1-85.5) | 79.8 (78.6-81.0) | 76.9 (76.1-77.8) | 74.6 (73.8-75.4) | 73.3 (71.4-75.2) |
| Latin America & Caribbean            | 81.3 (75.5-86.8) | 81.2 (78.4-84.0) | 80.5 (78.8-82.2) | 78.9 (77.6-80.1) | 77.1 (74.8-79.3) |
| Oceania                              | 67.7 (60.7-74.6) | 68.3 (63.6-73.0) | 70.0 (65.3-74.7) | 71.9 (67.4-76.5) | 74.6 (68.5-80.8) |
| South Asia                           | 78.0 (70.4-85.4) | 79.5 (75.7-83.1) | 80.6 (78.5-82.7) | 81.4 (79.9-82.9) | 82.9 (80.2-85.7) |
| Sub-Saharan Africa                   | 76.5 (71.9-81.0) | 78.5 (76.1-80.9) | 80.6 (78.8-82.4) | 81.8 (80.3-83.3) | 82.9 (80.6-85.3) |
| <b>85+ years</b>                     |                  |                  |                  |                  |                  |
| World                                | 82.8 (80.5-85.3) | 80.7 (79.5-81.9) | 79.0 (78.2-79.8) | 77.5 (76.8-78.2) | 77.1 (75.8-78.3) |
| Central & Eastern Europe             | 91.4 (86.1-97.1) | 90.2 (87.3-93.1) | 87.7 (85.2-90.1) | 85.5 (83.1-87.9) | 84.1 (80.7-87.6) |
| Central Asia & MENA                  | 82.4 (75.1-89.3) | 82.6 (78.5-86.5) | 83.0 (80.4-85.4) | 82.9 (81.0-84.7) | 81.9 (79.4-84.5) |
| East & Southeast Asia                | 78.7 (73.8-84.0) | 78.8 (76.7-80.9) | 79.2 (77.7-80.7) | 80.0 (78.6-81.3) | 80.0 (76.9-83.2) |
| High-income Asia Pacific             | 81.0 (78.2-83.7) | 78.5 (76.9-80.1) | 76.5 (75.0-78.0) | 74.6 (73.1-76.1) | 74.0 (71.1-77.1) |
| High-income western                  | 82.4 (79.5-85.4) | 78.8 (77.4-80.2) | 75.8 (74.8-76.8) | 73.1 (72.2-74.1) | 72.2 (70.1-74.3) |
| Latin America & Caribbean            | 81.2 (75.0-87.3) | 81.2 (78.0-84.3) | 80.4 (78.3-82.4) | 78.6 (77.0-80.3) | 76.7 (74.0-79.3) |
| Oceania                              | 65.5 (56.7-74.1) | 66.8 (60.7-72.8) | 68.6 (62.4-75.0) | 71.1 (65.1-77.0) | 73.9 (66.4-81.4) |
| South Asia                           | 79.1 (70.6-87.3) | 80.7 (76.4-84.8) | 81.9 (79.3-84.3) | 82.7 (80.8-84.7) | 84.3 (81.2-87.5) |
| Sub-Saharan Africa                   | 76.3 (71.2-81.0) | 78.2 (75.5-80.9) | 80.3 (78.2-82.5) | 81.6 (79.6-83.6) | 83.1 (80.4-85.9) |



| Prevalence of raised blood pressure |                   |                   |                   |                   |                   |
|-------------------------------------|-------------------|-------------------|-------------------|-------------------|-------------------|
| Super-region (Men)                  | Year              |                   |                   |                   |                   |
|                                     | 1975              | 1985              | 1995              | 2005              | 2015              |
| <b>18-19 years</b>                  |                   |                   |                   |                   |                   |
| World                               | 8.4% (5.8-12.0)   | 7.5% (5.8-9.7)    | 7.3% (5.9-9.0)    | 6.8% (5.5-8.3)    | 6.5% (5.0-8.3)    |
| Central & Eastern Europe            | 18.2% (10.6-28.9) | 17.1% (11.7-24.3) | 14.8% (10.5-20.2) | 12.0% (8.8-16.4)  | 10.8% (7.1-16.1)  |
| Central Asia & MENA                 | 9.2% (4.4-15.7)   | 8.5% (5.5-12.3)   | 7.7% (5.7-10.2)   | 6.9% (5.3-8.8)    | 6.3% (4.2-8.9)    |
| East & Southeast Asia               | 4.7% (2.0-8.4)    | 4.7% (2.8-6.8)    | 5.3% (3.7-7.1)    | 5.4% (3.9-7.3)    | 5.3% (3.2-7.9)    |
| High-income Asia Pacific            | 11.3% (7.4-17.0)  | 9.1% (6.7-12.0)   | 7.2% (5.3-9.4)    | 5.6% (3.9-7.4)    | 4.1% (2.2-6.5)    |
| High-income western                 | 13.1% (8.8-19.1)  | 11.0% (8.3-14.5)  | 8.2% (6.5-10.3)   | 6.0% (4.6-7.5)    | 4.3% (2.7-6.1)    |
| Latin America & Caribbean           | 11.1% (6.1-18.2)  | 10.0% (6.7-14.2)  | 8.6% (6.2-11.5)   | 7.1% (5.3-9.3)    | 6.0% (3.8-8.8)    |
| Oceania                             | 5.2% (1.9-10.5)   | 5.1% (2.4-8.8)    | 5.4% (2.7-9.0)    | 5.7% (3.0-9.2)    | 6.4% (2.6-11.8)   |
| South Asia                          | 6.4% (2.4-12.3)   | 6.6% (3.7-10.2)   | 6.8% (4.4-9.8)    | 7.2% (5.1-9.8)    | 7.6% (4.9-11.4)   |
| Sub-Saharan Africa                  | 7.8% (4.0-13.1)   | 8.2% (5.5-11.8)   | 8.3% (6.2-11.1)   | 7.9% (6.0-10.3)   | 7.6% (5.1-10.7)   |
| <b>20-24 years</b>                  |                   |                   |                   |                   |                   |
| World                               | 10.3% (7.7-13.5)  | 9.6% (7.9-11.7)   | 9.2% (7.9-10.5)   | 8.8% (7.8-10.0)   | 8.3% (6.9-10.0)   |
| Central & Eastern Europe            | 19.5% (13.1-28.0) | 18.8% (14.4-24.3) | 16.5% (13.2-20.7) | 14.0% (11.2-17.5) | 12.7% (9.2-17.4)  |
| Central Asia & MENA                 | 11.2% (6.2-17.3)  | 10.6% (7.6-14.1)  | 9.8% (7.8-12.0)   | 8.9% (7.4-10.5)   | 8.2% (6.1-10.7)   |
| East & Southeast Asia               | 6.4% (3.4-10.4)   | 6.6% (4.6-8.7)    | 7.2% (5.5-8.9)    | 7.5% (5.9-9.1)    | 7.1% (4.8-9.9)    |
| High-income Asia Pacific            | 13.7% (10.0-18.8) | 11.0% (8.8-13.6)  | 9.3% (7.4-11.3)   | 7.5% (5.9-9.2)    | 5.8% (3.8-8.2)    |
| High-income western                 | 14.9% (11.0-19.8) | 12.7% (10.5-15.4) | 10.4% (8.9-12.1)  | 7.9% (6.7-9.3)    | 6.0% (4.3-7.9)    |
| Latin America & Caribbean           | 13.0% (8.1-19.1)  | 12.1% (9.0-15.9)  | 10.6% (8.3-13.1)  | 9.2% (7.5-11.1)   | 7.9% (5.7-10.6)   |
| Oceania                             | 6.9% (3.2-12.5)   | 7.0% (4.1-10.7)   | 7.3% (4.4-10.9)   | 7.6% (4.8-11.2)   | 8.3% (4.3-13.7)   |
| South Asia                          | 8.3% (3.9-14.3)   | 8.6% (5.5-12.2)   | 8.9% (6.5-11.7)   | 9.3% (7.2-11.5)   | 9.6% (6.9-13.2)   |
| Sub-Saharan Africa                  | 9.7% (5.8-14.9)   | 10.2% (7.5-13.6)  | 10.4% (8.3-12.9)  | 9.9% (8.2-11.9)   | 9.5% (7.2-12.3)   |
| <b>25-29 years</b>                  |                   |                   |                   |                   |                   |
| World                               | 13.9% (10.8-17.8) | 13.1% (11.1-15.5) | 12.4% (10.8-14.0) | 12.1% (10.7-13.5) | 11.3% (9.6-13.3)  |
| Central & Eastern Europe            | 23.6% (16.9-32.5) | 22.9% (18.2-28.7) | 20.5% (16.9-24.9) | 17.9% (14.9-21.5) | 16.4% (12.4-21.5) |
| Central Asia & MENA                 | 14.7% (8.9-21.4)  | 14.2% (10.6-18.2) | 13.2% (10.9-15.9) | 12.2% (10.4-14.1) | 11.2% (8.6-14.1)  |
| East & Southeast Asia               | 9.2% (5.3-13.9)   | 9.5% (7.0-12.0)   | 10.1% (8.1-12.2)  | 10.5% (8.6-12.4)  | 9.9% (6.9-13.3)   |
| High-income Asia Pacific            | 18.0% (13.7-23.6) | 14.6% (12.1-17.5) | 12.5% (10.3-14.8) | 10.7% (8.7-12.6)  | 8.6% (6.0-11.5)   |
| High-income western                 | 18.9% (14.6-24.5) | 16.0% (13.6-19.0) | 13.9% (12.1-15.9) | 11.1% (9.5-12.7)  | 8.8% (6.6-11.0)   |
| Latin America & Caribbean           | 16.8% (11.4-23.6) | 15.8% (12.3-19.8) | 14.0% (11.5-16.9) | 12.4% (10.4-14.5) | 11.0% (8.2-14.1)  |
| Oceania                             | 9.7% (4.9-16.2)   | 9.9% (6.3-14.1)   | 10.2% (6.7-14.3)  | 10.6% (7.2-14.7)  | 11.4% (6.6-17.4)  |
| South Asia                          | 11.4% (6.1-18.2)  | 11.7% (8.2-15.8)  | 12.0% (9.4-15.1)  | 12.5% (10.2-15.0) | 12.9% (9.7-16.8)  |
| Sub-Saharan Africa                  | 13.0% (8.4-18.9)  | 13.7% (10.5-17.3) | 13.9% (11.5-16.6) | 13.3% (11.3-15.5) | 12.8% (10.1-15.9) |
| <b>30-34 years</b>                  |                   |                   |                   |                   |                   |
| World                               | 17.9% (14.0-22.6) | 16.9% (14.4-19.7) | 16.1% (14.3-18.0) | 15.4% (13.8-17.0) | 14.7% (12.6-17.0) |
| Central & Eastern Europe            | 29.7% (21.7-39.4) | 29.1% (23.9-35.3) | 26.2% (22.0-31.0) | 22.9% (19.4-27.1) | 21.1% (16.3-27.1) |
| Central Asia & MENA                 | 18.9% (11.6-27.1) | 18.4% (13.8-23.4) | 17.1% (14.3-20.3) | 15.8% (13.6-18.2) | 14.3% (11.1-17.9) |
| East & Southeast Asia               | 12.0% (7.1-18.0)  | 12.2% (9.2-15.3)  | 13.2% (10.8-15.7) | 13.6% (11.2-15.9) | 13.0% (9.4-17.1)  |
| High-income Asia Pacific            | 23.1% (17.9-29.7) | 19.4% (16.4-22.9) | 16.2% (13.5-18.9) | 13.9% (11.6-16.3) | 11.2% (8.0-14.8)  |
| High-income western                 | 24.4% (19.1-31.0) | 20.7% (17.7-24.3) | 17.6% (15.5-19.8) | 14.6% (12.8-16.4) | 11.5% (8.8-14.3)  |
| Latin America & Caribbean           | 21.6% (14.8-29.7) | 20.3% (15.9-25.1) | 18.2% (15.1-21.6) | 16.0% (13.6-18.5) | 14.3% (10.8-18.1) |
| Oceania                             | 12.5% (6.5-20.7)  | 12.8% (8.4-18.1)  | 13.3% (9.0-18.2)  | 13.8% (9.4-18.7)  | 14.7% (8.6-22.2)  |
| South Asia                          | 14.7% (8.0-23.2)  | 15.1% (10.8-20.1) | 15.5% (12.2-19.2) | 16.1% (13.4-19.1) | 16.5% (12.5-21.3) |
| Sub-Saharan Africa                  | 16.8% (11.0-24.1) | 17.6% (13.8-22.1) | 17.9% (15.0-21.1) | 17.3% (14.8-19.9) | 16.5% (13.2-20.2) |
| <b>35-39 years</b>                  |                   |                   |                   |                   |                   |
| World                               | 23.1% (18.0-29.0) | 21.7% (18.6-25.0) | 20.4% (18.4-22.6) | 19.1% (17.3-21.0) | 18.3% (15.7-21.1) |

| Prevalence of raised blood pressure |                   |                   |                   |                   |                   |
|-------------------------------------|-------------------|-------------------|-------------------|-------------------|-------------------|
| Super-region (Men)                  | Year              |                   |                   |                   |                   |
|                                     | 1975              | 1985              | 1995              | 2005              | 2015              |
| Central & Eastern Europe            | 37.8% (27.6-49.1) | 36.9% (30.8-43.6) | 33.3% (28.5-38.6) | 29.0% (24.9-33.9) | 26.7% (20.7-33.8) |
| Central Asia & MENA                 | 23.9% (14.4-34.4) | 23.1% (17.3-29.3) | 21.5% (17.9-25.5) | 19.8% (17.1-22.7) | 17.8% (13.8-22.4) |
| East & Southeast Asia               | 14.9% (8.6-22.7)  | 15.2% (11.6-19.1) | 16.5% (13.6-19.4) | 16.9% (14.0-19.8) | 16.2% (11.7-21.5) |
| High-income Asia Pacific            | 29.2% (22.7-36.9) | 25.1% (21.3-29.3) | 20.4% (17.2-23.7) | 17.2% (14.5-20.0) | 13.9% (9.9-18.5)  |
| High-income western                 | 31.4% (24.6-39.4) | 26.5% (22.8-30.7) | 21.7% (19.2-24.4) | 18.3% (16.1-20.4) | 14.3% (11.1-17.7) |
| Latin America & Caribbean           | 27.3% (18.5-37.3) | 25.8% (20.2-31.7) | 23.0% (19.0-27.1) | 20.1% (17.1-23.1) | 17.7% (13.4-22.6) |
| Oceania                             | 15.5% (7.8-26.0)  | 15.8% (10.1-22.7) | 16.5% (11.0-22.8) | 17.2% (11.7-23.3) | 18.3% (10.4-27.9) |
| South Asia                          | 18.3% (9.7-29.1)  | 18.8% (13.3-25.0) | 19.3% (15.2-23.9) | 20.1% (16.7-23.8) | 20.6% (15.5-26.7) |
| Sub-Saharan Africa                  | 21.1% (13.6-30.6) | 22.2% (17.3-27.8) | 22.6% (18.9-26.7) | 21.8% (18.7-24.9) | 20.7% (16.4-25.4) |
| <b>40-44 years</b>                  |                   |                   |                   |                   |                   |
| World                               | 28.2% (21.9-35.2) | 26.7% (22.8-30.8) | 25.1% (22.5-27.9) | 23.7% (21.3-26.0) | 22.1% (18.6-25.8) |
| Central & Eastern Europe            | 46.0% (34.2-58.3) | 45.1% (38.3-52.5) | 41.0% (35.4-47.1) | 35.9% (30.7-41.8) | 33.0% (25.6-41.6) |
| Central Asia & MENA                 | 29.2% (17.1-42.0) | 28.5% (21.1-36.0) | 26.6% (22.1-31.3) | 24.4% (21.1-28.1) | 21.9% (16.9-27.6) |
| East & Southeast Asia               | 18.2% (10.2-28.0) | 18.7% (14.1-23.7) | 20.1% (16.4-23.9) | 20.8% (17.2-24.5) | 19.7% (13.8-26.8) |
| High-income Asia Pacific            | 36.5% (28.4-45.7) | 31.1% (26.4-36.2) | 25.9% (21.9-30.0) | 21.0% (17.6-24.5) | 17.1% (12.0-23.0) |
| High-income western                 | 38.4% (30.2-47.5) | 33.3% (28.6-38.1) | 27.0% (23.7-30.2) | 22.2% (19.5-24.8) | 17.6% (13.6-22.0) |
| Latin America & Caribbean           | 33.8% (22.9-45.8) | 31.8% (25.0-39.0) | 28.4% (23.6-33.6) | 24.9% (21.1-28.8) | 21.7% (16.3-27.8) |
| Oceania                             | 18.9% (9.1-32.0)  | 19.4% (12.1-27.9) | 20.3% (13.2-28.3) | 21.1% (14.2-28.7) | 22.6% (12.6-34.5) |
| South Asia                          | 22.4% (11.5-35.7) | 23.1% (16.1-30.9) | 23.7% (18.4-29.5) | 24.7% (20.4-29.3) | 25.3% (18.8-32.9) |
| Sub-Saharan Africa                  | 26.0% (16.5-37.6) | 27.5% (21.2-34.6) | 27.9% (23.5-33.0) | 26.9% (23.1-30.9) | 25.5% (20.1-31.4) |
| <b>45-49 years</b>                  |                   |                   |                   |                   |                   |
| World                               | 34.7% (27.5-42.4) | 33.2% (28.7-37.9) | 31.1% (28.1-34.1) | 29.1% (26.5-31.8) | 26.8% (22.7-31.3) |
| Central & Eastern Europe            | 53.9% (41.3-66.2) | 52.9% (45.7-60.6) | 48.5% (42.8-54.7) | 43.0% (37.4-49.2) | 39.7% (31.5-48.8) |
| Central Asia & MENA                 | 35.4% (21.4-49.5) | 34.5% (26.0-42.9) | 32.2% (27.0-37.7) | 29.9% (26.1-33.9) | 27.0% (21.0-33.5) |
| East & Southeast Asia               | 22.5% (13.1-34.1) | 23.3% (17.7-29.0) | 25.0% (20.7-29.4) | 25.8% (21.7-30.1) | 24.4% (17.1-32.9) |
| High-income Asia Pacific            | 44.0% (35.1-53.9) | 37.5% (32.2-43.2) | 32.2% (27.7-36.9) | 26.0% (22.0-30.0) | 21.0% (15.1-27.9) |
| High-income western                 | 45.3% (36.4-54.5) | 40.7% (35.6-46.1) | 33.2% (29.5-36.7) | 26.8% (23.8-29.9) | 21.9% (17.1-27.0) |
| Latin America & Caribbean           | 40.6% (28.2-53.4) | 38.5% (30.6-46.2) | 34.6% (29.1-40.2) | 30.5% (26.2-35.0) | 26.8% (20.4-33.8) |
| Oceania                             | 23.4% (11.6-38.7) | 24.0% (15.1-34.0) | 25.0% (16.6-34.3) | 26.0% (17.9-34.8) | 27.6% (16.1-40.9) |
| South Asia                          | 27.4% (14.4-42.6) | 28.3% (20.0-37.4) | 29.1% (23.0-35.7) | 30.2% (25.2-35.5) | 30.9% (23.2-39.5) |
| Sub-Saharan Africa                  | 31.6% (20.4-44.7) | 33.4% (26.2-41.4) | 33.9% (28.8-39.7) | 32.8% (28.4-37.3) | 31.1% (24.9-37.8) |
| <b>50-54 years</b>                  |                   |                   |                   |                   |                   |
| World                               | 40.5% (33.1-48.5) | 39.2% (34.5-44.0) | 37.3% (34.2-40.5) | 35.2% (32.5-38.0) | 32.8% (28.6-37.4) |
| Central & Eastern Europe            | 59.8% (47.8-71.0) | 59.3% (52.5-66.1) | 55.1% (49.7-60.7) | 49.7% (44.3-55.5) | 46.2% (37.3-55.4) |
| Central Asia & MENA                 | 41.6% (26.9-55.7) | 40.6% (31.8-49.1) | 38.6% (33.1-44.2) | 36.2% (32.3-40.3) | 33.1% (26.8-40.0) |
| East & Southeast Asia               | 28.1% (17.4-40.7) | 28.9% (23.0-35.1) | 31.0% (26.4-35.7) | 31.8% (27.3-36.4) | 30.3% (22.2-39.4) |
| High-income Asia Pacific            | 50.1% (41.2-59.7) | 44.6% (39.1-50.3) | 38.7% (33.9-43.7) | 32.9% (28.5-37.3) | 26.3% (19.7-33.5) |
| High-income western                 | 51.6% (42.7-60.5) | 46.9% (41.8-52.3) | 40.1% (36.4-43.8) | 32.8% (29.6-36.0) | 27.1% (21.9-32.7) |
| Latin America & Caribbean           | 47.1% (34.5-59.4) | 45.1% (37.0-52.8) | 41.0% (35.3-46.7) | 36.8% (32.3-41.4) | 32.9% (25.8-40.3) |
| Oceania                             | 29.1% (15.6-45.2) | 29.7% (19.7-40.5) | 30.9% (21.5-40.9) | 32.0% (22.9-41.5) | 33.6% (21.1-47.2) |
| South Asia                          | 33.4% (19.1-49.2) | 34.4% (25.5-44.0) | 35.4% (28.9-42.2) | 36.4% (31.1-42.0) | 37.1% (28.9-46.1) |
| Sub-Saharan Africa                  | 37.7% (25.6-51.2) | 39.8% (32.0-47.9) | 40.5% (35.1-46.3) | 39.2% (34.7-43.9) | 37.4% (30.8-44.3) |
| <b>55-59 years</b>                  |                   |                   |                   |                   |                   |
| World                               | 45.3% (37.6-53.5) | 45.8% (41.1-50.7) | 44.1% (40.9-47.4) | 41.6% (38.8-44.4) | 39.0% (34.6-43.7) |
| Central & Eastern Europe            | 65.1% (53.9-75.8) | 64.7% (58.2-71.3) | 60.6% (54.8-66.3) | 55.7% (50.3-61.2) | 52.3% (43.8-61.0) |
| Central Asia & MENA                 | 47.7% (32.9-61.6) | 46.9% (38.3-55.4) | 44.8% (39.3-50.6) | 42.4% (38.3-46.7) | 39.4% (32.7-46.3) |

| Prevalence of raised blood pressure |                   |                   |                   |                   |                   |
|-------------------------------------|-------------------|-------------------|-------------------|-------------------|-------------------|
| Super-region (Men)                  | Year              |                   |                   |                   |                   |
|                                     | 1975              | 1985              | 1995              | 2005              | 2015              |
| East & Southeast Asia               | 34.1% (22.4-47.1) | 35.2% (28.7-41.5) | 37.3% (32.4-42.2) | 38.1% (33.3-42.9) | 36.5% (28.1-45.6) |
| High-income Asia Pacific            | 56.0% (47.4-65.3) | 51.2% (45.8-56.8) | 45.0% (40.1-50.1) | 39.8% (35.1-44.5) | 32.4% (25.1-40.0) |
| High-income western                 | 56.2% (47.6-64.6) | 52.5% (47.4-57.8) | 47.1% (43.4-50.9) | 39.3% (35.9-42.6) | 32.7% (27.0-38.8) |
| Latin America & Caribbean           | 53.1% (40.6-64.8) | 51.3% (43.4-59.0) | 47.3% (41.6-53.0) | 43.1% (38.5-47.7) | 39.1% (31.8-46.5) |
| Oceania                             | 35.2% (20.4-51.3) | 35.9% (25.1-46.9) | 37.1% (26.9-47.3) | 38.3% (28.6-47.7) | 39.8% (26.7-52.9) |
| South Asia                          | 39.4% (24.3-55.3) | 40.6% (31.3-50.1) | 41.6% (34.9-48.4) | 42.7% (37.2-48.1) | 43.3% (34.7-52.2) |
| Sub-Saharan Africa                  | 43.8% (31.5-57.0) | 45.9% (38.0-54.0) | 46.7% (41.3-52.3) | 45.4% (40.8-50.2) | 43.6% (36.9-50.4) |
| 60-64 years                         |                   |                   |                   |                   |                   |
| World                               | 52.2% (44.8-59.9) | 50.7% (46.0-55.4) | 49.2% (45.9-52.4) | 46.9% (44.0-49.8) | 44.1% (39.3-48.9) |
| Central & Eastern Europe            | 69.1% (58.8-78.9) | 68.6% (62.5-75.0) | 65.1% (59.7-70.4) | 60.6% (55.4-65.6) | 57.3% (49.2-65.4) |
| Central Asia & MENA                 | 52.7% (38.4-65.7) | 52.1% (43.4-60.3) | 50.0% (44.5-55.6) | 47.7% (43.5-51.9) | 44.6% (37.6-51.6) |
| East & Southeast Asia               | 39.5% (27.3-52.5) | 40.6% (33.9-47.1) | 42.7% (37.7-47.7) | 43.6% (38.7-48.3) | 41.8% (32.7-51.2) |
| High-income Asia Pacific            | 61.3% (53.2-70.0) | 56.1% (51.0-61.4) | 50.7% (45.9-55.6) | 45.3% (40.6-50.0) | 39.0% (31.0-47.0) |
| High-income western                 | 62.1% (54.0-69.7) | 57.1% (52.2-62.1) | 51.9% (48.2-55.6) | 45.1% (41.7-48.5) | 38.1% (32.0-44.4) |
| Latin America & Caribbean           | 58.0% (46.0-69.1) | 56.3% (48.7-63.5) | 52.5% (46.8-58.0) | 48.3% (43.8-52.8) | 44.4% (37.1-51.7) |
| Oceania                             | 40.5% (25.2-56.5) | 41.4% (30.0-52.2) | 42.5% (32.0-52.4) | 43.6% (33.5-52.9) | 45.1% (32.0-58.0) |
| South Asia                          | 44.6% (29.2-60.0) | 45.9% (36.5-55.3) | 46.8% (40.1-53.5) | 48.1% (42.6-53.4) | 48.5% (39.8-57.1) |
| Sub-Saharan Africa                  | 49.0% (36.7-61.6) | 51.1% (43.3-58.8) | 51.8% (46.4-57.2) | 50.7% (46.1-55.3) | 48.9% (42.2-55.6) |
| 65-69 years                         |                   |                   |                   |                   |                   |
| World                               | 56.7% (49.5-64.1) | 53.5% (48.8-58.2) | 53.4% (50.2-56.5) | 51.2% (48.4-54.0) | 47.8% (43.2-52.2) |
| Central & Eastern Europe            | 72.0% (62.2-81.1) | 71.9% (65.9-77.9) | 68.5% (63.2-73.7) | 64.0% (58.7-69.4) | 61.2% (53.3-68.8) |
| Central Asia & MENA                 | 56.7% (42.4-69.2) | 56.0% (47.5-64.2) | 54.0% (48.6-59.4) | 51.7% (47.6-55.8) | 48.5% (41.6-55.3) |
| East & Southeast Asia               | 43.5% (30.8-56.4) | 44.6% (37.6-51.1) | 46.8% (41.7-51.8) | 47.7% (42.8-52.4) | 45.8% (36.7-55.0) |
| High-income Asia Pacific            | 65.3% (57.4-73.6) | 60.1% (55.1-65.3) | 55.2% (50.4-59.9) | 49.5% (44.8-54.0) | 43.9% (35.6-52.2) |
| High-income western                 | 65.8% (58.0-73.5) | 59.4% (54.5-64.4) | 55.4% (51.7-58.9) | 49.8% (46.4-53.0) | 42.3% (36.2-48.4) |
| Latin America & Caribbean           | 61.7% (50.1-72.4) | 60.1% (52.8-67.2) | 56.5% (51.0-61.8) | 52.3% (47.9-56.8) | 48.3% (41.1-55.4) |
| Oceania                             | 44.5% (28.7-60.2) | 45.5% (33.9-56.3) | 46.6% (35.9-56.5) | 47.7% (37.6-56.8) | 49.0% (35.5-61.6) |
| South Asia                          | 48.4% (32.5-63.4) | 49.8% (40.4-58.9) | 50.7% (43.8-57.5) | 51.9% (46.5-57.2) | 52.4% (43.8-60.8) |
| Sub-Saharan Africa                  | 52.7% (40.3-64.9) | 54.9% (47.1-62.5) | 55.6% (50.2-61.1) | 54.7% (50.1-59.3) | 52.8% (46.1-59.2) |
| 70-74 years                         |                   |                   |                   |                   |                   |
| World                               | 59.7% (52.5-66.9) | 57.8% (53.1-62.5) | 55.7% (52.3-59.2) | 53.6% (50.6-56.6) | 50.3% (45.5-54.7) |
| Central & Eastern Europe            | 74.1% (64.2-83.1) | 74.0% (67.5-80.5) | 70.9% (65.3-76.5) | 66.6% (61.2-72.1) | 63.7% (56.0-71.4) |
| Central Asia & MENA                 | 59.1% (44.6-71.6) | 58.5% (50.0-66.6) | 56.6% (51.1-62.3) | 54.2% (49.9-58.3) | 50.8% (43.6-57.8) |
| East & Southeast Asia               | 46.1% (32.5-59.2) | 47.3% (40.0-54.1) | 49.5% (44.1-54.8) | 50.4% (45.3-55.3) | 48.6% (39.1-57.8) |
| High-income Asia Pacific            | 68.4% (60.3-76.7) | 63.3% (58.0-68.8) | 57.9% (53.0-62.9) | 52.6% (47.8-57.3) | 46.8% (38.2-55.4) |
| High-income western                 | 68.6% (60.7-76.6) | 63.5% (58.4-68.7) | 57.7% (53.8-61.5) | 52.3% (48.8-55.6) | 45.2% (38.9-51.3) |
| Latin America & Caribbean           | 64.0% (52.5-74.9) | 62.6% (55.2-69.7) | 58.9% (53.2-64.6) | 54.8% (50.2-59.4) | 50.8% (43.5-57.9) |
| Oceania                             | 47.1% (31.3-62.5) | 48.2% (36.4-59.2) | 49.3% (38.4-59.2) | 50.3% (40.2-59.4) | 51.5% (37.6-64.1) |
| South Asia                          | 50.8% (34.8-65.6) | 52.2% (42.5-61.5) | 53.2% (46.0-60.2) | 54.3% (48.5-60.1) | 54.9% (46.2-63.4) |
| Sub-Saharan Africa                  | 55.1% (42.5-67.4) | 57.4% (49.4-65.0) | 58.1% (52.5-63.9) | 57.2% (52.2-62.0) | 55.4% (48.6-62.0) |
| 75-79 years                         |                   |                   |                   |                   |                   |
| World                               | 61.5% (54.2-68.9) | 59.7% (54.9-64.7) | 56.3% (52.5-60.0) | 55.1% (51.8-58.3) | 51.7% (46.8-56.5) |
| Central & Eastern Europe            | 75.1% (65.1-84.6) | 75.1% (68.0-82.2) | 72.1% (65.9-78.3) | 67.8% (61.9-73.9) | 64.8% (56.7-73.0) |
| Central Asia & MENA                 | 60.7% (46.2-73.1) | 60.1% (51.3-68.3) | 58.1% (52.3-64.1) | 55.7% (51.1-60.1) | 52.2% (44.9-59.2) |
| East & Southeast Asia               | 47.6% (33.4-60.9) | 48.8% (40.8-56.0) | 51.0% (44.9-56.7) | 51.9% (46.3-57.3) | 50.0% (40.0-59.6) |
| High-income Asia Pacific            | 70.1% (61.8-78.8) | 65.2% (59.6-71.1) | 59.7% (54.4-65.2) | 54.7% (49.4-59.9) | 48.5% (39.4-57.5) |

| Prevalence of raised blood pressure |                   |                   |                   |                   |                   |
|-------------------------------------|-------------------|-------------------|-------------------|-------------------|-------------------|
| Super-region (Men)                  | Year              |                   |                   |                   |                   |
|                                     | 1975              | 1985              | 1995              | 2005              | 2015              |
| High-income western                 | 69.4% (61.3-77.7) | 65.0% (59.7-70.5) | 57.4% (53.4-61.5) | 53.4% (49.6-57.0) | 47.1% (40.5-53.3) |
| Latin America & Caribbean           | 65.3% (53.5-76.2) | 63.9% (56.3-71.3) | 60.3% (54.4-66.1) | 56.2% (51.3-61.1) | 52.0% (44.3-59.4) |
| Oceania                             | 48.6% (32.4-63.9) | 49.7% (37.6-60.7) | 50.7% (39.8-60.8) | 51.7% (41.4-61.2) | 52.9% (38.9-66.1) |
| South Asia                          | 51.8% (35.4-66.9) | 53.2% (42.9-63.0) | 54.3% (46.5-61.8) | 55.4% (48.9-61.8) | 55.9% (46.8-64.9) |
| Sub-Saharan Africa                  | 56.4% (43.6-68.7) | 58.6% (50.6-66.4) | 59.3% (53.2-65.4) | 58.6% (53.4-63.9) | 56.9% (49.6-63.7) |
| 80-84 years                         |                   |                   |                   |                   |                   |
| World                               | 62.5% (55.4-69.9) | 60.4% (55.4-65.2) | 58.0% (54.2-61.6) | 55.1% (51.7-58.4) | 51.6% (46.5-56.4) |
| Central & Eastern Europe            | 75.6% (65.1-85.4) | 75.3% (67.5-82.7) | 72.4% (65.4-79.1) | 68.3% (62.2-74.5) | 65.3% (57.3-73.8) |
| Central Asia & MENA                 | 61.5% (47.2-74.0) | 60.3% (51.6-68.8) | 58.4% (52.5-64.4) | 55.9% (51.0-60.8) | 52.2% (44.5-59.6) |
| East & Southeast Asia               | 48.0% (33.3-61.5) | 49.2% (40.3-57.3) | 51.4% (44.7-58.2) | 52.4% (46.1-58.6) | 50.4% (39.7-60.8) |
| High-income Asia Pacific            | 70.9% (61.9-79.8) | 66.3% (59.7-72.9) | 60.8% (54.7-66.9) | 55.5% (49.3-61.6) | 49.8% (39.9-59.5) |
| High-income western                 | 68.9% (60.3-77.9) | 65.4% (59.6-71.3) | 59.5% (55.4-63.7) | 53.5% (49.8-57.4) | 47.3% (40.4-53.7) |
| Latin America & Caribbean           | 65.5% (53.6-76.5) | 63.9% (56.0-71.6) | 60.3% (54.0-66.4) | 56.3% (50.7-61.5) | 52.1% (44.1-59.8) |
| Oceania                             | 49.5% (33.2-64.9) | 50.0% (37.7-61.4) | 51.0% (39.9-61.2) | 52.0% (41.5-61.5) | 53.1% (38.8-66.0) |
| South Asia                          | 51.8% (34.7-67.4) | 53.1% (41.8-63.5) | 54.1% (45.3-62.3) | 55.3% (47.4-62.5) | 55.7% (45.9-65.4) |
| Sub-Saharan Africa                  | 56.7% (43.7-69.0) | 58.6% (50.2-66.7) | 59.4% (53.3-65.7) | 58.7% (53.2-64.1) | 57.3% (49.7-64.3) |
| 85+ years                           |                   |                   |                   |                   |                   |
| World                               | 62.3% (52.3-73.2) | 59.2% (51.3-67.6) | 56.8% (50.1-63.6) | 53.3% (47.4-59.4) | 50.2% (43.4-56.9) |
| Central & Eastern Europe            | 73.8% (58.2-88.3) | 73.6% (59.0-86.7) | 70.7% (57.3-83.1) | 66.8% (55.1-78.1) | 63.9% (52.5-76.4) |
| Central Asia & MENA                 | 60.7% (45.5-76.0) | 59.4% (48.5-71.0) | 57.5% (49.0-66.7) | 55.1% (47.4-63.0) | 51.5% (42.0-61.0) |
| East & Southeast Asia               | 47.7% (31.9-62.5) | 48.5% (37.2-59.9) | 50.7% (40.7-61.1) | 51.6% (41.7-61.8) | 49.9% (37.3-62.2) |
| High-income Asia Pacific            | 70.7% (56.7-84.2) | 66.2% (54.5-77.9) | 60.9% (50.4-71.8) | 55.7% (45.6-66.1) | 50.4% (37.3-63.4) |
| High-income western                 | 67.2% (54.0-80.6) | 62.5% (52.6-72.4) | 57.7% (50.5-64.9) | 51.2% (45.5-57.0) | 46.0% (37.6-53.6) |
| Latin America & Caribbean           | 63.3% (49.4-77.5) | 62.0% (50.6-73.6) | 58.8% (49.2-68.2) | 55.1% (46.4-63.5) | 51.2% (40.8-61.4) |
| Oceania                             | 48.3% (30.3-65.7) | 48.9% (34.9-62.3) | 50.1% (36.9-62.7) | 51.1% (38.4-63.3) | 52.1% (36.4-67.4) |
| South Asia                          | 50.2% (30.9-68.8) | 51.2% (36.5-65.3) | 52.1% (39.2-64.3) | 53.2% (40.9-64.6) | 53.6% (40.0-67.1) |
| Sub-Saharan Africa                  | 56.1% (42.4-70.4) | 57.4% (47.3-68.0) | 58.2% (49.5-67.4) | 57.4% (49.2-66.4) | 56.3% (47.0-66.2) |

| Prevalence of raised blood pressure |                   |                   |                   |                   |                  |
|-------------------------------------|-------------------|-------------------|-------------------|-------------------|------------------|
| Super-region (Women)                | Year              |                   |                   |                   |                  |
|                                     | 1975              | 1985              | 1995              | 2005              | 2015             |
| <b>18-19 years</b>                  |                   |                   |                   |                   |                  |
| World                               | 3.7% (2.0-6.5)    | 3.1% (2.0-4.6)    | 3.0% (2.1-4.2)    | 2.6% (1.9-3.6)    | 2.7% (1.8-4.0)   |
| Central & Eastern Europe            | 10.1% (4.0-20.4)  | 8.0% (4.2-13.8)   | 5.6% (3.3-8.8)    | 3.4% (2.0-5.4)    | 2.4% (1.1-4.4)   |
| Central Asia & MENA                 | 6.0% (2.1-13.2)   | 5.5% (2.8-9.7)    | 4.7% (2.8-7.5)    | 3.5% (2.3-5.2)    | 2.7% (1.5-4.5)   |
| East & Southeast Asia               | 1.4% (0.4-3.3)    | 1.4% (0.7-2.3)    | 1.7% (1.0-2.5)    | 1.5% (1.0-2.3)    | 1.5% (0.7-2.7)   |
| High-income Asia Pacific            | 3.1% (1.5-6.0)    | 1.7% (1.0-2.8)    | 1.0% (0.5-1.6)    | 0.5% (0.2-0.9)    | 0.3% (0.1-0.7)   |
| High-income western                 | 4.3% (2.2-7.9)    | 2.9% (1.9-4.5)    | 1.8% (1.2-2.5)    | 0.9% (0.6-1.4)    | 0.5% (0.2-0.9)   |
| Latin America & Caribbean           | 6.3% (2.4-13.8)   | 4.9% (2.6-8.8)    | 3.5% (2.1-5.7)    | 2.2% (1.3-3.3)    | 1.4% (0.7-2.5)   |
| Oceania                             | 1.7% (0.4-4.4)    | 1.7% (0.6-3.6)    | 2.0% (0.8-4.1)    | 2.4% (1.0-4.8)    | 3.2% (0.9-8.2)   |
| South Asia                          | 2.8% (0.7-7.5)    | 3.0% (1.3-6.0)    | 3.3% (1.8-5.7)    | 3.5% (2.1-5.5)    | 3.7% (1.9-6.7)   |
| Sub-Saharan Africa                  | 3.5% (1.3-7.5)    | 3.9% (2.2-6.7)    | 4.4% (2.7-6.9)    | 4.4% (2.8-6.7)    | 4.5% (2.5-7.6)   |
| <b>20-24 years</b>                  |                   |                   |                   |                   |                  |
| World                               | 4.2% (2.7-6.5)    | 3.8% (2.8-5.0)    | 3.6% (2.8-4.4)    | 3.4% (2.7-4.1)    | 3.2% (2.4-4.2)   |
| Central & Eastern Europe            | 10.0% (5.1-17.6)  | 8.6% (5.6-12.6)   | 6.3% (4.4-8.7)    | 4.2% (2.9-5.8)    | 3.1% (1.7-5.0)   |
| Central Asia & MENA                 | 6.5% (2.9-12.4)   | 6.1% (3.7-9.4)    | 5.4% (3.8-7.5)    | 4.3% (3.3-5.6)    | 3.3% (2.2-4.9)   |
| East & Southeast Asia               | 2.0% (0.8-3.9)    | 2.0% (1.2-3.1)    | 2.3% (1.6-3.1)    | 2.3% (1.6-3.0)    | 2.0% (1.2-3.2)   |
| High-income Asia Pacific            | 4.0% (2.3-6.6)    | 2.5% (1.6-3.5)    | 1.6% (1.0-2.3)    | 1.0% (0.6-1.4)    | 0.5% (0.2-1.0)   |
| High-income western                 | 5.0% (3.0-7.9)    | 3.6% (2.6-4.8)    | 2.5% (1.9-3.2)    | 1.5% (1.1-1.9)    | 0.9% (0.5-1.4)   |
| Latin America & Caribbean           | 6.8% (3.3-12.6)   | 5.6% (3.5-8.8)    | 4.3% (3.0-6.1)    | 2.9% (2.1-4.0)    | 2.0% (1.2-3.2)   |
| Oceania                             | 2.3% (0.7-5.1)    | 2.4% (1.1-4.4)    | 2.7% (1.3-4.9)    | 3.2% (1.6-5.6)    | 3.9% (1.5-8.1)   |
| South Asia                          | 3.5% (1.2-7.9)    | 3.8% (2.0-6.4)    | 4.1% (2.6-6.2)    | 4.3% (2.9-6.0)    | 4.5% (2.7-7.0)   |
| Sub-Saharan Africa                  | 4.2% (2.0-7.7)    | 4.6% (3.0-7.0)    | 5.1% (3.6-7.1)    | 5.1% (3.7-6.9)    | 5.1% (3.4-7.6)   |
| <b>25-29 years</b>                  |                   |                   |                   |                   |                  |
| World                               | 6.2% (4.4-8.8)    | 5.8% (4.5-7.3)    | 5.3% (4.4-6.3)    | 5.1% (4.3-6.0)    | 4.7% (3.7-5.8)   |
| Central & Eastern Europe            | 12.5% (7.3-20.2)  | 11.1% (7.9-15.3)  | 8.7% (6.6-11.3)   | 6.3% (4.8-8.3)    | 4.8% (3.0-7.2)   |
| Central Asia & MENA                 | 8.8% (4.6-15.1)   | 8.4% (5.7-12.0)   | 7.7% (5.8-10.0)   | 6.4% (5.1-7.9)    | 5.1% (3.6-6.9)   |
| East & Southeast Asia               | 3.4% (1.6-6.0)    | 3.6% (2.4-4.9)    | 3.8% (2.8-4.9)    | 3.9% (2.9-4.9)    | 3.4% (2.1-5.1)   |
| High-income Asia Pacific            | 6.2% (4.0-9.3)    | 4.2% (3.1-5.6)    | 2.9% (2.1-3.9)    | 2.0% (1.4-2.8)    | 1.3% (0.6-2.2)   |
| High-income western                 | 7.2% (4.8-10.5)   | 5.3% (4.1-6.8)    | 4.1% (3.3-5.0)    | 2.8% (2.2-3.4)    | 1.9% (1.2-2.7)   |
| Latin America & Caribbean           | 9.1% (5.1-15.2)   | 7.9% (5.4-11.4)   | 6.3% (4.8-8.3)    | 4.7% (3.6-6.0)    | 3.4% (2.3-5.0)   |
| Oceania                             | 3.8% (1.5-7.4)    | 4.0% (2.2-6.5)    | 4.5% (2.6-7.1)    | 5.0% (3.0-7.9)    | 5.9% (2.8-10.7)  |
| South Asia                          | 5.3% (2.2-10.2)   | 5.7% (3.5-8.7)    | 6.1% (4.2-8.4)    | 6.3% (4.7-8.3)    | 6.5% (4.4-9.5)   |
| Sub-Saharan Africa                  | 6.1% (3.3-10.1)   | 6.7% (4.7-9.5)    | 7.3% (5.5-9.6)    | 7.3% (5.7-9.3)    | 7.3% (5.3-9.9)   |
| <b>30-34 years</b>                  |                   |                   |                   |                   |                  |
| World                               | 9.7% (7.0-13.2)   | 9.0% (7.3-11.0)   | 8.5% (7.2-9.8)    | 7.8% (6.8-8.9)    | 7.4% (6.1-9.0)   |
| Central & Eastern Europe            | 18.1% (11.6-27.2) | 16.4% (12.4-21.6) | 13.4% (10.7-16.9) | 10.0% (7.9-12.6)  | 7.8% (5.1-11.1)  |
| Central Asia & MENA                 | 13.3% (7.6-21.3)  | 12.8% (9.2-17.5)  | 11.7% (9.2-14.7)  | 10.0% (8.3-12.0)  | 8.0% (5.9-10.6)  |
| East & Southeast Asia               | 5.8% (3.0-9.6)    | 5.9% (4.1-7.8)    | 6.4% (5.0-7.9)    | 6.2% (4.9-7.7)    | 5.8% (3.9-8.1)   |
| High-income Asia Pacific            | 10.1% (6.9-14.3)  | 7.2% (5.5-9.1)    | 5.1% (3.9-6.5)    | 3.7% (2.7-4.8)    | 2.4% (1.3-3.8)   |
| High-income western                 | 11.3% (7.9-15.7)  | 8.6% (6.8-10.6)   | 6.7% (5.5-7.9)    | 4.8% (3.9-5.8)    | 3.3% (2.3-4.6)   |
| Latin America & Caribbean           | 13.6% (8.3-21.2)  | 12.0% (8.7-16.5)  | 9.9% (7.8-12.5)   | 7.5% (6.1-9.2)    | 5.7% (3.9-7.9)   |
| Oceania                             | 6.2% (2.8-11.2)   | 6.6% (3.8-10.1)   | 7.3% (4.5-10.8)   | 8.1% (5.2-11.9)   | 9.2% (4.9-15.6)  |
| South Asia                          | 8.3% (3.9-15.0)   | 8.9% (5.7-12.9)   | 9.4% (6.9-12.5)   | 9.7% (7.6-12.3)   | 10.0% (7.0-13.8) |
| Sub-Saharan Africa                  | 9.5% (5.5-15.0)   | 10.5% (7.6-14.2)  | 11.3% (8.9-14.2)  | 11.3% (9.1-13.9)  | 11.1% (8.5-14.5) |
| <b>35-39 years</b>                  |                   |                   |                   |                   |                  |
| World                               | 15.6% (11.6-20.7) | 14.1% (11.7-17.0) | 13.3% (11.7-15.2) | 12.0% (10.6-13.5) | 11.4% (9.5-13.6) |

| Prevalence of raised blood pressure |                   |                   |                   |                   |                   |
|-------------------------------------|-------------------|-------------------|-------------------|-------------------|-------------------|
| Super-region (Women)                | Year              |                   |                   |                   |                   |
|                                     | 1975              | 1985              | 1995              | 2005              | 2015              |
| Central & Eastern Europe            | 27.7% (18.5-39.1) | 25.0% (19.8-31.2) | 20.6% (17.0-24.9) | 15.7% (12.7-19.2) | 12.4% (8.4-17.1)  |
| Central Asia & MENA                 | 20.2% (12.1-30.9) | 19.6% (14.5-26.1) | 18.0% (14.6-22.1) | 15.5% (13.1-18.2) | 12.6% (9.4-16.2)  |
| East & Southeast Asia               | 9.2% (4.9-15.0)   | 9.4% (6.8-12.3)   | 10.2% (8.2-12.4)  | 9.9% (8.0-11.9)   | 9.2% (6.4-12.8)   |
| High-income Asia Pacific            | 16.1% (11.3-22.1) | 11.9% (9.4-14.6)  | 8.4% (6.6-10.4)   | 6.0% (4.6-7.5)    | 4.0% (2.4-6.1)    |
| High-income western                 | 18.0% (13.0-24.1) | 13.6% (11.1-16.5) | 10.4% (8.8-12.1)  | 7.8% (6.5-9.1)    | 5.4% (3.8-7.2)    |
| Latin America & Caribbean           | 20.7% (13.0-31.0) | 18.5% (13.8-24.5) | 15.4% (12.3-18.9) | 11.8% (9.7-14.2)  | 9.0% (6.4-12.2)   |
| Oceania                             | 9.7% (4.5-17.4)   | 10.4% (6.2-15.6)  | 11.5% (7.4-16.5)  | 12.6% (8.4-17.9)  | 14.4% (7.9-23.5)  |
| South Asia                          | 12.7% (6.2-22.2)  | 13.6% (9.1-19.3)  | 14.4% (10.8-18.7) | 14.9% (12.0-18.3) | 15.2% (11.0-20.5) |
| Sub-Saharan Africa                  | 14.7% (8.8-22.6)  | 16.2% (12.1-21.3) | 17.4% (14.1-21.3) | 17.5% (14.6-20.8) | 17.2% (13.3-21.6) |
| <b>40-44 years</b>                  |                   |                   |                   |                   |                   |
| World                               | 22.7% (17.1-29.3) | 21.0% (17.5-25.1) | 19.7% (17.3-22.2) | 17.8% (16.0-19.9) | 16.3% (13.5-19.4) |
| Central & Eastern Europe            | 39.0% (27.1-52.7) | 35.8% (29.0-43.5) | 30.3% (25.5-35.8) | 23.6% (19.1-28.6) | 18.8% (12.9-25.5) |
| Central Asia & MENA                 | 29.3% (18.0-43.2) | 28.8% (21.7-37.4) | 26.6% (21.9-32.0) | 23.0% (19.6-26.7) | 18.8% (14.1-23.9) |
| East & Southeast Asia               | 14.0% (7.6-22.5)  | 14.5% (10.7-18.8) | 15.4% (12.5-18.5) | 15.1% (12.4-18.1) | 13.6% (9.3-19.2)  |
| High-income Asia Pacific            | 24.5% (17.6-32.8) | 18.3% (14.7-22.3) | 13.3% (10.6-16.1) | 9.3% (7.3-11.6)   | 6.3% (3.7-9.5)    |
| High-income western                 | 26.4% (19.5-34.6) | 20.9% (17.3-25.0) | 15.9% (13.6-18.4) | 11.7% (9.9-13.7)  | 8.3% (5.9-11.0)   |
| Latin America & Caribbean           | 30.0% (19.6-43.4) | 27.2% (20.6-34.9) | 22.8% (18.4-27.7) | 17.8% (14.7-21.2) | 13.5% (9.6-18.1)  |
| Oceania                             | 14.6% (6.9-25.6)  | 15.6% (9.5-23.2)  | 17.3% (11.2-24.4) | 18.9% (12.7-26.1) | 21.4% (12.0-33.7) |
| South Asia                          | 18.8% (9.3-32.4)  | 20.1% (13.6-28.2) | 21.2% (16.1-27.0) | 21.9% (17.9-26.5) | 22.3% (16.3-29.5) |
| Sub-Saharan Africa                  | 21.7% (13.3-32.3) | 24.1% (18.2-31.1) | 25.8% (21.1-30.8) | 25.8% (21.9-30.2) | 25.3% (19.9-31.4) |
| <b>45-49 years</b>                  |                   |                   |                   |                   |                   |
| World                               | 32.0% (24.9-40.0) | 30.2% (25.7-35.1) | 27.6% (24.7-30.6) | 25.2% (22.9-27.6) | 22.5% (18.9-26.5) |
| Central & Eastern Europe            | 51.1% (37.4-65.4) | 48.0% (40.2-56.2) | 40.9% (35.4-47.1) | 32.8% (27.3-38.6) | 26.7% (19.1-35.0) |
| Central Asia & MENA                 | 39.4% (25.6-55.1) | 38.6% (30.0-48.3) | 36.3% (30.6-42.6) | 32.0% (27.8-36.3) | 26.5% (20.5-33.0) |
| East & Southeast Asia               | 20.1% (11.4-31.4) | 21.0% (15.8-26.7) | 22.2% (18.4-26.4) | 21.9% (18.3-25.7) | 19.5% (13.5-27.1) |
| High-income Asia Pacific            | 34.3% (25.6-44.1) | 26.3% (21.6-31.4) | 19.7% (16.1-23.6) | 14.0% (11.2-17.2) | 9.4% (5.7-13.9)   |
| High-income western                 | 35.9% (27.4-45.3) | 30.1% (25.4-35.2) | 22.9% (19.9-26.0) | 16.9% (14.5-19.4) | 12.4% (9.0-16.1)  |
| Latin America & Caribbean           | 40.3% (27.6-55.4) | 37.0% (29.0-46.0) | 31.7% (26.2-37.5) | 25.2% (21.2-29.5) | 19.4% (14.2-25.5) |
| Oceania                             | 20.9% (10.1-35.1) | 22.4% (14.1-32.2) | 24.6% (16.3-33.8) | 26.7% (18.5-35.8) | 29.5% (17.5-44.0) |
| South Asia                          | 26.1% (13.6-42.9) | 28.0% (19.5-38.0) | 29.5% (22.9-36.5) | 30.3% (25.1-35.8) | 30.7% (22.9-39.6) |
| Sub-Saharan Africa                  | 30.0% (19.0-43.1) | 33.2% (25.7-41.6) | 35.3% (29.7-41.2) | 35.4% (30.9-40.5) | 34.6% (28.0-41.7) |
| <b>50-54 years</b>                  |                   |                   |                   |                   |                   |
| World                               | 40.8% (33.0-49.3) | 38.5% (33.6-43.7) | 36.2% (33.0-39.5) | 33.0% (30.4-35.6) | 29.7% (25.4-34.2) |
| Central & Eastern Europe            | 60.6% (47.0-73.8) | 57.8% (50.3-65.3) | 50.7% (45.1-56.6) | 42.2% (36.3-48.2) | 35.0% (25.8-44.8) |
| Central Asia & MENA                 | 48.9% (33.9-64.3) | 48.3% (39.0-57.9) | 46.1% (39.9-52.4) | 41.2% (36.7-45.7) | 35.0% (28.1-42.2) |
| East & Southeast Asia               | 27.4% (16.3-40.5) | 28.5% (22.3-35.1) | 30.4% (25.8-35.1) | 29.4% (25.1-34.0) | 26.8% (19.5-35.6) |
| High-income Asia Pacific            | 44.2% (34.4-54.6) | 35.4% (29.8-41.2) | 27.5% (23.0-32.1) | 20.7% (17.1-24.6) | 14.0% (9.2-19.8)  |
| High-income western                 | 45.5% (36.2-54.9) | 38.8% (33.6-44.2) | 31.4% (27.9-34.9) | 23.6% (20.7-26.6) | 17.7% (13.3-22.5) |
| Latin America & Caribbean           | 49.9% (36.2-64.7) | 46.5% (37.7-55.6) | 40.7% (34.7-46.9) | 33.4% (28.8-38.2) | 26.6% (20.1-33.9) |
| Oceania                             | 28.2% (14.8-44.7) | 30.1% (20.2-41.4) | 32.7% (22.9-43.2) | 35.3% (25.4-45.4) | 38.0% (24.3-53.3) |
| South Asia                          | 34.1% (19.3-52.5) | 36.4% (26.7-47.5) | 38.2% (30.9-45.7) | 39.0% (33.1-45.0) | 39.5% (30.3-49.2) |
| Sub-Saharan Africa                  | 38.7% (25.9-52.9) | 42.3% (34.1-51.0) | 44.9% (38.9-51.1) | 44.9% (40.2-50.2) | 43.9% (36.7-51.1) |
| <b>55-59 years</b>                  |                   |                   |                   |                   |                   |
| World                               | 47.6% (39.5-56.4) | 47.3% (42.3-52.6) | 45.0% (41.6-48.5) | 40.8% (37.9-43.6) | 37.3% (32.5-41.9) |
| Central & Eastern Europe            | 68.4% (55.4-80.1) | 65.8% (58.6-73.1) | 59.5% (53.5-65.5) | 50.7% (44.7-56.7) | 43.4% (33.7-53.4) |
| Central Asia & MENA                 | 57.0% (41.9-72.0) | 56.3% (47.0-65.8) | 53.9% (47.6-60.3) | 49.6% (44.8-54.3) | 43.2% (35.8-50.5) |

| Prevalence of raised blood pressure |                   |                   |                   |                   |                   |
|-------------------------------------|-------------------|-------------------|-------------------|-------------------|-------------------|
| Super-region (Women)                | Year              |                   |                   |                   |                   |
|                                     | 1975              | 1985              | 1995              | 2005              | 2015              |
| East & Southeast Asia               | 35.0% (22.2-49.2) | 36.4% (29.6-43.6) | 38.5% (33.5-43.6) | 37.6% (32.8-42.5) | 34.7% (26.5-44.0) |
| High-income Asia Pacific            | 53.0% (43.0-63.3) | 44.3% (38.4-50.4) | 35.7% (30.7-40.9) | 28.5% (24.0-33.1) | 20.2% (14.0-27.2) |
| High-income western                 | 52.5% (43.1-61.6) | 46.8% (41.4-52.4) | 40.4% (36.6-44.3) | 31.3% (27.8-34.8) | 24.1% (18.6-29.9) |
| Latin America & Caribbean           | 57.8% (44.5-71.7) | 54.8% (46.2-63.6) | 49.1% (42.9-55.4) | 41.6% (36.6-46.6) | 34.2% (26.9-42.1) |
| Oceania                             | 36.0% (20.7-53.2) | 38.1% (27.0-49.7) | 40.9% (30.3-52.0) | 43.6% (33.1-53.7) | 46.2% (31.7-61.1) |
| South Asia                          | 41.9% (25.6-60.1) | 44.4% (34.0-55.4) | 46.2% (38.4-53.9) | 47.2% (40.9-53.3) | 47.5% (37.7-57.3) |
| Sub-Saharan Africa                  | 46.9% (33.4-60.9) | 50.6% (42.2-59.2) | 53.2% (47.2-59.4) | 53.3% (48.3-58.4) | 52.1% (44.9-59.0) |
| <b>60-64 years</b>                  |                   |                   |                   |                   |                   |
| World                               | 55.9% (48.4-63.9) | 53.9% (49.2-58.8) | 51.5% (48.2-54.8) | 47.8% (44.9-50.7) | 43.7% (38.8-48.4) |
| Central & Eastern Europe            | 73.1% (61.6-83.4) | 70.7% (64.0-77.4) | 65.2% (59.6-70.8) | 57.4% (51.8-62.9) | 50.6% (41.1-59.8) |
| Central Asia & MENA                 | 62.8% (49.1-75.9) | 62.4% (53.8-70.9) | 60.3% (54.6-66.1) | 56.4% (51.9-60.8) | 50.0% (42.7-57.0) |
| East & Southeast Asia               | 42.3% (29.0-56.3) | 43.7% (36.7-50.7) | 45.7% (40.5-50.8) | 45.1% (40.2-49.9) | 41.6% (32.6-51.2) |
| High-income Asia Pacific            | 60.0% (50.7-69.5) | 51.9% (46.0-57.9) | 43.7% (38.4-49.0) | 36.2% (31.1-41.3) | 28.1% (20.5-36.4) |
| High-income western                 | 60.3% (51.6-68.7) | 53.8% (48.6-59.1) | 47.5% (43.7-51.2) | 39.1% (35.3-42.8) | 31.2% (25.0-37.6) |
| Latin America & Caribbean           | 63.6% (51.5-76.0) | 60.9% (53.2-69.0) | 55.7% (49.8-61.3) | 48.6% (43.6-53.3) | 41.3% (33.7-49.1) |
| Oceania                             | 43.0% (27.0-59.6) | 45.3% (33.8-56.6) | 48.0% (37.6-58.4) | 50.6% (40.3-60.2) | 53.1% (38.8-66.9) |
| South Asia                          | 48.4% (32.2-65.6) | 51.0% (40.8-61.3) | 52.7% (45.1-60.1) | 53.7% (47.4-59.7) | 53.8% (44.2-63.2) |
| Sub-Saharan Africa                  | 53.5% (40.4-66.5) | 57.2% (49.3-65.1) | 59.4% (53.7-65.3) | 59.7% (54.9-64.7) | 58.5% (51.6-65.0) |
| <b>65-69 years</b>                  |                   |                   |                   |                   |                   |
| World                               | 60.9% (54.2-68.0) | 57.9% (53.7-62.4) | 57.0% (53.8-60.1) | 53.6% (50.8-56.3) | 48.9% (44.4-53.1) |
| Central & Eastern Europe            | 75.8% (65.8-84.9) | 74.0% (67.8-80.3) | 69.2% (63.9-74.5) | 62.3% (56.8-67.9) | 56.2% (47.6-64.3) |
| Central Asia & MENA                 | 66.6% (54.2-78.1) | 66.5% (58.9-73.8) | 64.4% (59.1-69.8) | 60.8% (56.5-65.1) | 55.3% (48.5-61.9) |
| East & Southeast Asia               | 48.3% (35.7-61.1) | 49.6% (42.9-56.2) | 51.6% (46.4-56.4) | 50.9% (46.2-55.6) | 47.8% (39.2-56.5) |
| High-income Asia Pacific            | 64.9% (56.5-73.5) | 57.8% (52.4-63.6) | 50.4% (45.4-55.5) | 43.3% (38.3-48.2) | 36.0% (27.7-44.4) |
| High-income western                 | 64.8% (56.9-72.5) | 57.5% (52.7-62.5) | 53.0% (49.3-56.5) | 46.3% (42.7-49.7) | 38.1% (32.0-44.2) |
| Latin America & Caribbean           | 67.4% (56.8-78.3) | 65.1% (58.0-72.4) | 60.5% (55.1-65.8) | 54.2% (49.5-58.6) | 47.3% (40.1-54.6) |
| Oceania                             | 48.8% (33.4-64.2) | 51.2% (40.0-61.8) | 53.6% (43.5-63.1) | 55.9% (46.2-64.8) | 58.0% (45.0-70.8) |
| South Asia                          | 53.3% (38.2-68.6) | 55.7% (46.3-65.2) | 57.3% (50.0-64.3) | 58.1% (51.9-63.8) | 58.3% (49.4-66.8) |
| Sub-Saharan Africa                  | 58.4% (46.5-69.9) | 61.8% (54.7-69.0) | 63.8% (58.4-69.1) | 64.0% (59.6-68.6) | 63.0% (56.6-69.0) |
| <b>70-74 years</b>                  |                   |                   |                   |                   |                   |
| World                               | 64.4% (58.2-70.9) | 62.7% (58.4-67.1) | 60.4% (57.1-63.7) | 57.2% (54.2-60.2) | 53.2% (49.1-57.2) |
| Central & Eastern Europe            | 77.1% (67.8-85.9) | 75.6% (68.8-82.2) | 71.2% (65.6-76.9) | 65.5% (60.2-71.1) | 60.2% (52.6-67.7) |
| Central Asia & MENA                 | 68.9% (58.0-79.5) | 68.7% (61.7-75.7) | 67.0% (61.8-72.4) | 63.8% (59.4-68.2) | 58.9% (52.4-65.1) |
| East & Southeast Asia               | 52.8% (41.2-64.5) | 54.2% (47.4-60.6) | 55.8% (50.6-60.9) | 55.3% (50.5-60.0) | 52.6% (44.7-60.7) |
| High-income Asia Pacific            | 68.5% (60.8-76.3) | 62.3% (57.0-68.0) | 55.8% (50.9-60.8) | 49.5% (44.6-54.6) | 42.5% (34.2-50.8) |
| High-income western                 | 67.9% (60.7-75.4) | 62.7% (58.0-67.6) | 57.5% (54.0-61.1) | 51.5% (48.0-54.8) | 44.3% (38.2-50.1) |
| Latin America & Caribbean           | 69.6% (59.9-79.9) | 67.6% (61.0-74.8) | 63.5% (58.3-68.8) | 58.0% (53.5-62.5) | 51.9% (45.2-58.5) |
| Oceania                             | 53.5% (38.8-67.5) | 55.5% (44.9-65.5) | 57.7% (48.1-66.7) | 59.7% (50.8-68.0) | 61.4% (49.7-72.9) |
| South Asia                          | 56.6% (42.8-70.4) | 58.7% (49.8-67.8) | 60.2% (53.1-67.2) | 60.8% (54.3-67.0) | 61.1% (52.5-69.3) |
| Sub-Saharan Africa                  | 61.8% (51.1-72.3) | 64.8% (58.0-71.6) | 66.5% (61.1-71.9) | 66.6% (61.9-71.6) | 65.9% (59.7-72.1) |
| <b>75-79 years</b>                  |                   |                   |                   |                   |                   |
| World                               | 66.6% (60.8-72.9) | 65.0% (60.8-69.5) | 62.1% (58.7-65.5) | 59.7% (56.6-62.8) | 56.2% (52.1-60.3) |
| Central & Eastern Europe            | 77.5% (68.3-86.3) | 76.3% (68.9-83.2) | 72.7% (66.3-78.9) | 67.5% (61.5-73.1) | 62.8% (55.1-70.3) |
| Central Asia & MENA                 | 70.1% (60.1-80.2) | 69.9% (63.1-76.9) | 68.5% (63.1-74.2) | 65.6% (61.0-70.3) | 61.3% (55.2-67.1) |
| East & Southeast Asia               | 56.1% (44.8-66.7) | 57.2% (50.2-63.6) | 58.6% (53.0-64.1) | 58.1% (52.8-63.2) | 55.7% (48.1-63.5) |
| High-income Asia Pacific            | 70.8% (63.5-78.4) | 65.6% (60.0-71.3) | 59.9% (54.7-65.2) | 54.4% (49.0-59.7) | 47.8% (39.0-55.9) |

| Prevalence of raised blood pressure |                   |                   |                   |                   |                   |
|-------------------------------------|-------------------|-------------------|-------------------|-------------------|-------------------|
| Super-region (Women)                | Year              |                   |                   |                   |                   |
|                                     | 1975              | 1985              | 1995              | 2005              | 2015              |
| High-income western                 | 69.3% (62.6-76.7) | 65.2% (60.3-70.2) | 59.4% (55.7-63.0) | 55.1% (51.4-58.5) | 49.3% (42.9-55.0) |
| Latin America & Caribbean           | 70.9% (61.9-80.6) | 69.0% (62.4-76.0) | 65.5% (60.1-70.9) | 60.6% (55.8-65.1) | 55.2% (48.4-61.7) |
| Oceania                             | 56.8% (42.9-69.5) | 58.6% (47.6-68.4) | 60.4% (50.7-69.3) | 62.1% (53.0-70.6) | 63.6% (52.3-74.6) |
| South Asia                          | 58.4% (45.1-71.3) | 60.2% (51.2-69.5) | 61.5% (54.0-69.0) | 62.1% (54.9-68.9) | 62.3% (53.5-70.8) |
| Sub-Saharan Africa                  | 64.0% (54.4-73.6) | 66.6% (60.1-73.2) | 68.1% (62.6-73.6) | 68.1% (63.1-73.2) | 67.5% (61.5-73.7) |
| <b>80-84 years</b>                  |                   |                   |                   |                   |                   |
| World                               | 68.0% (62.5-74.1) | 66.2% (62.0-70.8) | 64.2% (60.8-67.7) | 60.9% (57.7-63.9) | 57.3% (53.0-61.3) |
| Central & Eastern Europe            | 77.9% (68.4-86.8) | 76.7% (68.6-84.0) | 73.4% (66.0-80.0) | 68.6% (62.4-74.5) | 64.5% (57.2-71.6) |
| Central Asia & MENA                 | 70.6% (61.5-80.5) | 70.3% (63.4-77.5) | 69.1% (63.4-75.1) | 66.3% (61.2-71.3) | 62.2% (56.0-68.1) |
| East & Southeast Asia               | 57.8% (46.3-68.3) | 58.7% (50.8-65.8) | 60.1% (53.5-66.3) | 59.7% (53.4-65.5) | 57.3% (48.9-65.2) |
| High-income Asia Pacific            | 72.5% (65.0-80.2) | 67.9% (61.7-74.4) | 62.9% (56.9-69.0) | 57.9% (51.5-64.1) | 51.9% (42.3-60.8) |
| High-income western                 | 70.0% (63.2-77.5) | 66.6% (61.6-71.9) | 62.5% (58.7-66.5) | 57.6% (53.7-61.3) | 52.2% (45.9-57.9) |
| Latin America & Caribbean           | 71.4% (62.5-80.9) | 69.6% (62.7-76.6) | 66.3% (60.5-71.9) | 61.9% (56.5-66.7) | 56.9% (49.8-63.4) |
| Oceania                             | 58.9% (45.2-71.3) | 60.3% (48.6-70.5) | 61.9% (51.1-71.7) | 63.4% (53.2-72.8) | 64.8% (53.1-76.0) |
| South Asia                          | 58.9% (44.9-71.7) | 60.5% (50.3-70.3) | 61.6% (52.7-69.9) | 62.2% (53.6-70.0) | 62.2% (52.3-71.4) |
| Sub-Saharan Africa                  | 65.2% (56.2-74.2) | 67.4% (61.0-73.9) | 68.8% (63.0-74.4) | 68.8% (63.7-74.1) | 68.2% (62.4-74.4) |
| <b>85+ years</b>                    |                   |                   |                   |                   |                   |
| World                               | 68.8% (58.9-78.7) | 66.2% (58.0-74.4) | 64.1% (57.2-70.9) | 60.4% (54.6-66.0) | 56.9% (50.4-63.0) |
| Central & Eastern Europe            | 78.1% (62.3-91.5) | 76.9% (62.2-89.3) | 73.8% (60.6-85.5) | 69.3% (58.0-79.9) | 65.1% (54.4-75.8) |
| Central Asia & MENA                 | 70.6% (57.3-84.6) | 70.1% (58.0-81.8) | 68.8% (57.6-79.5) | 66.3% (56.3-75.9) | 62.1% (52.8-71.4) |
| East & Southeast Asia               | 58.0% (44.1-70.7) | 58.7% (47.2-69.3) | 60.0% (49.1-69.9) | 59.6% (48.7-69.2) | 57.5% (46.0-68.1) |
| High-income Asia Pacific            | 74.3% (61.9-85.7) | 69.9% (59.3-79.8) | 65.2% (55.4-74.7) | 60.5% (50.0-70.7) | 54.8% (40.7-67.4) |
| High-income western                 | 70.2% (58.8-81.8) | 66.2% (57.6-75.0) | 62.6% (56.1-69.4) | 57.7% (52.0-63.1) | 53.0% (44.1-60.7) |
| Latin America & Caribbean           | 71.2% (57.9-84.7) | 69.5% (57.6-81.2) | 66.3% (56.1-76.1) | 62.3% (53.2-70.9) | 57.4% (47.1-66.9) |
| Oceania                             | 58.9% (40.5-75.8) | 60.5% (45.0-74.5) | 62.2% (47.1-76.1) | 63.6% (49.2-76.9) | 64.9% (49.7-79.6) |
| South Asia                          | 57.4% (39.2-74.8) | 58.7% (42.9-73.5) | 59.9% (44.4-73.4) | 60.5% (45.1-73.6) | 60.5% (44.3-74.7) |
| Sub-Saharan Africa                  | 65.8% (54.2-78.0) | 67.5% (57.0-78.0) | 68.8% (58.2-79.1) | 68.9% (58.4-79.0) | 67.9% (57.2-78.2) |



**Appendix Figure 1:** Flowchart of secondary search for data sources.

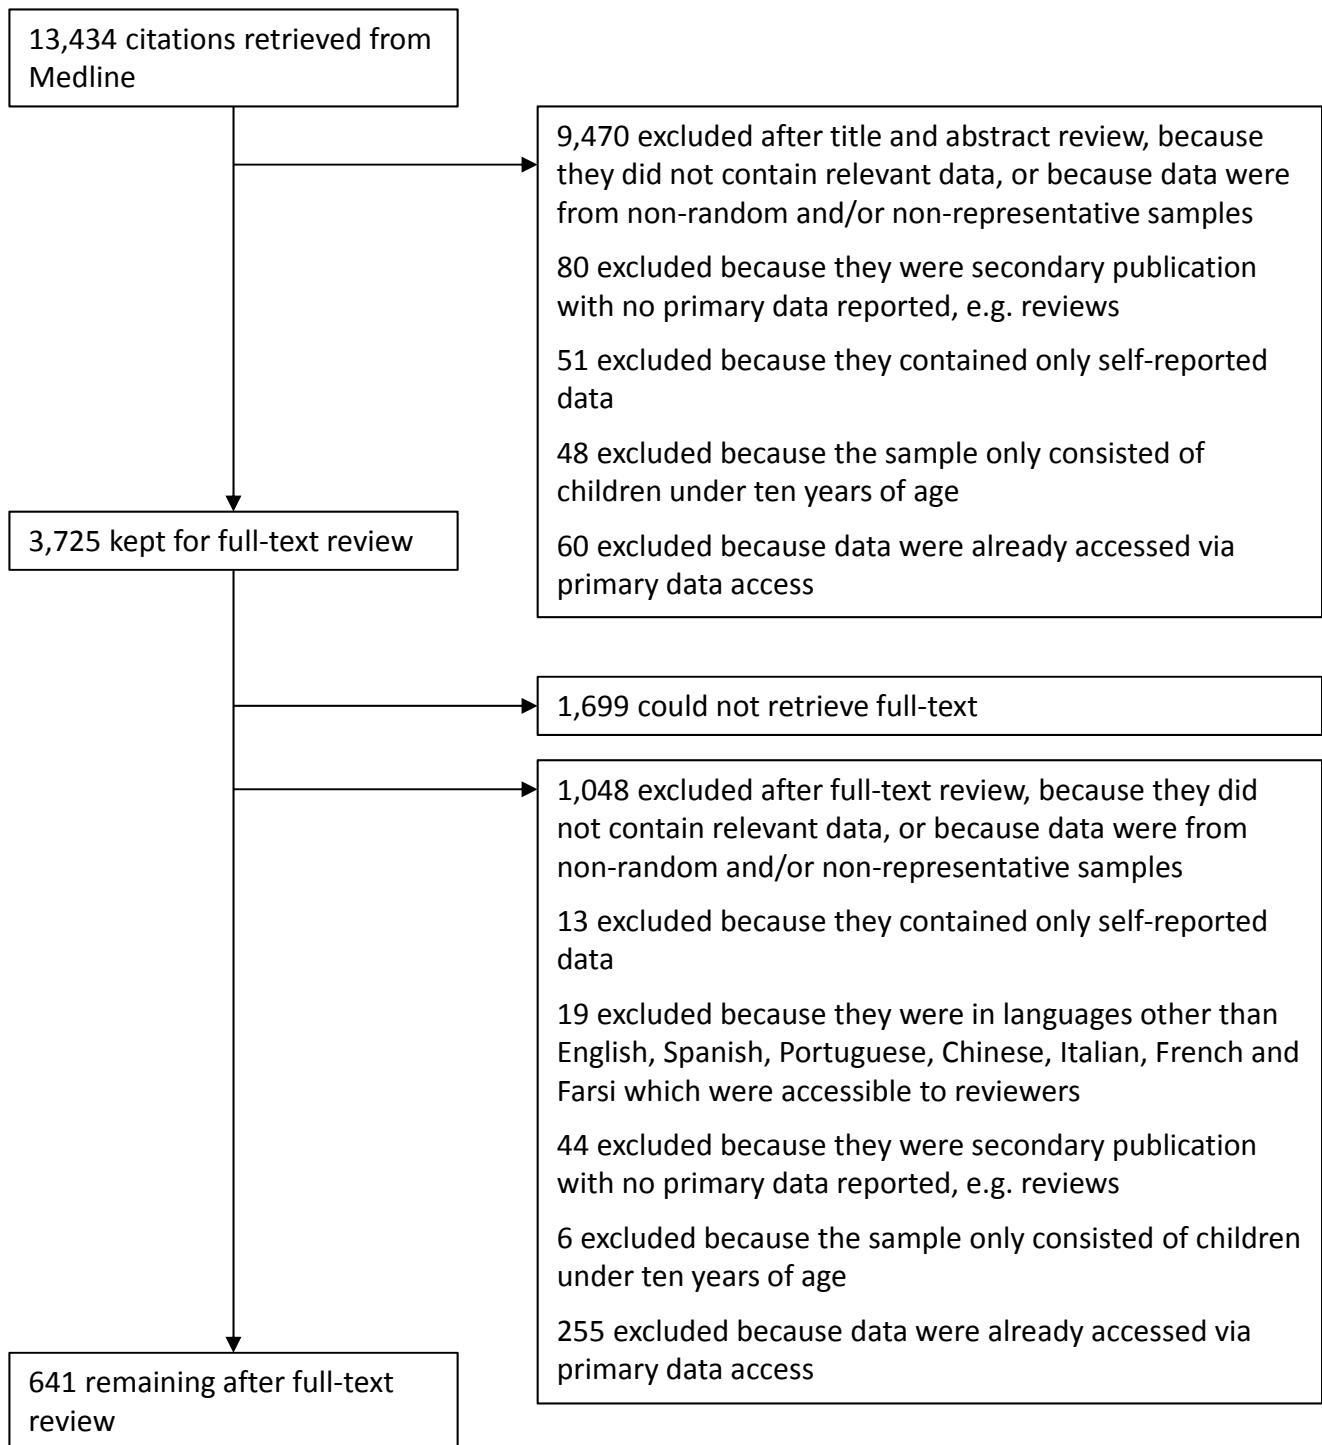

**Appendix Figure 2:** Number of data sources by country.

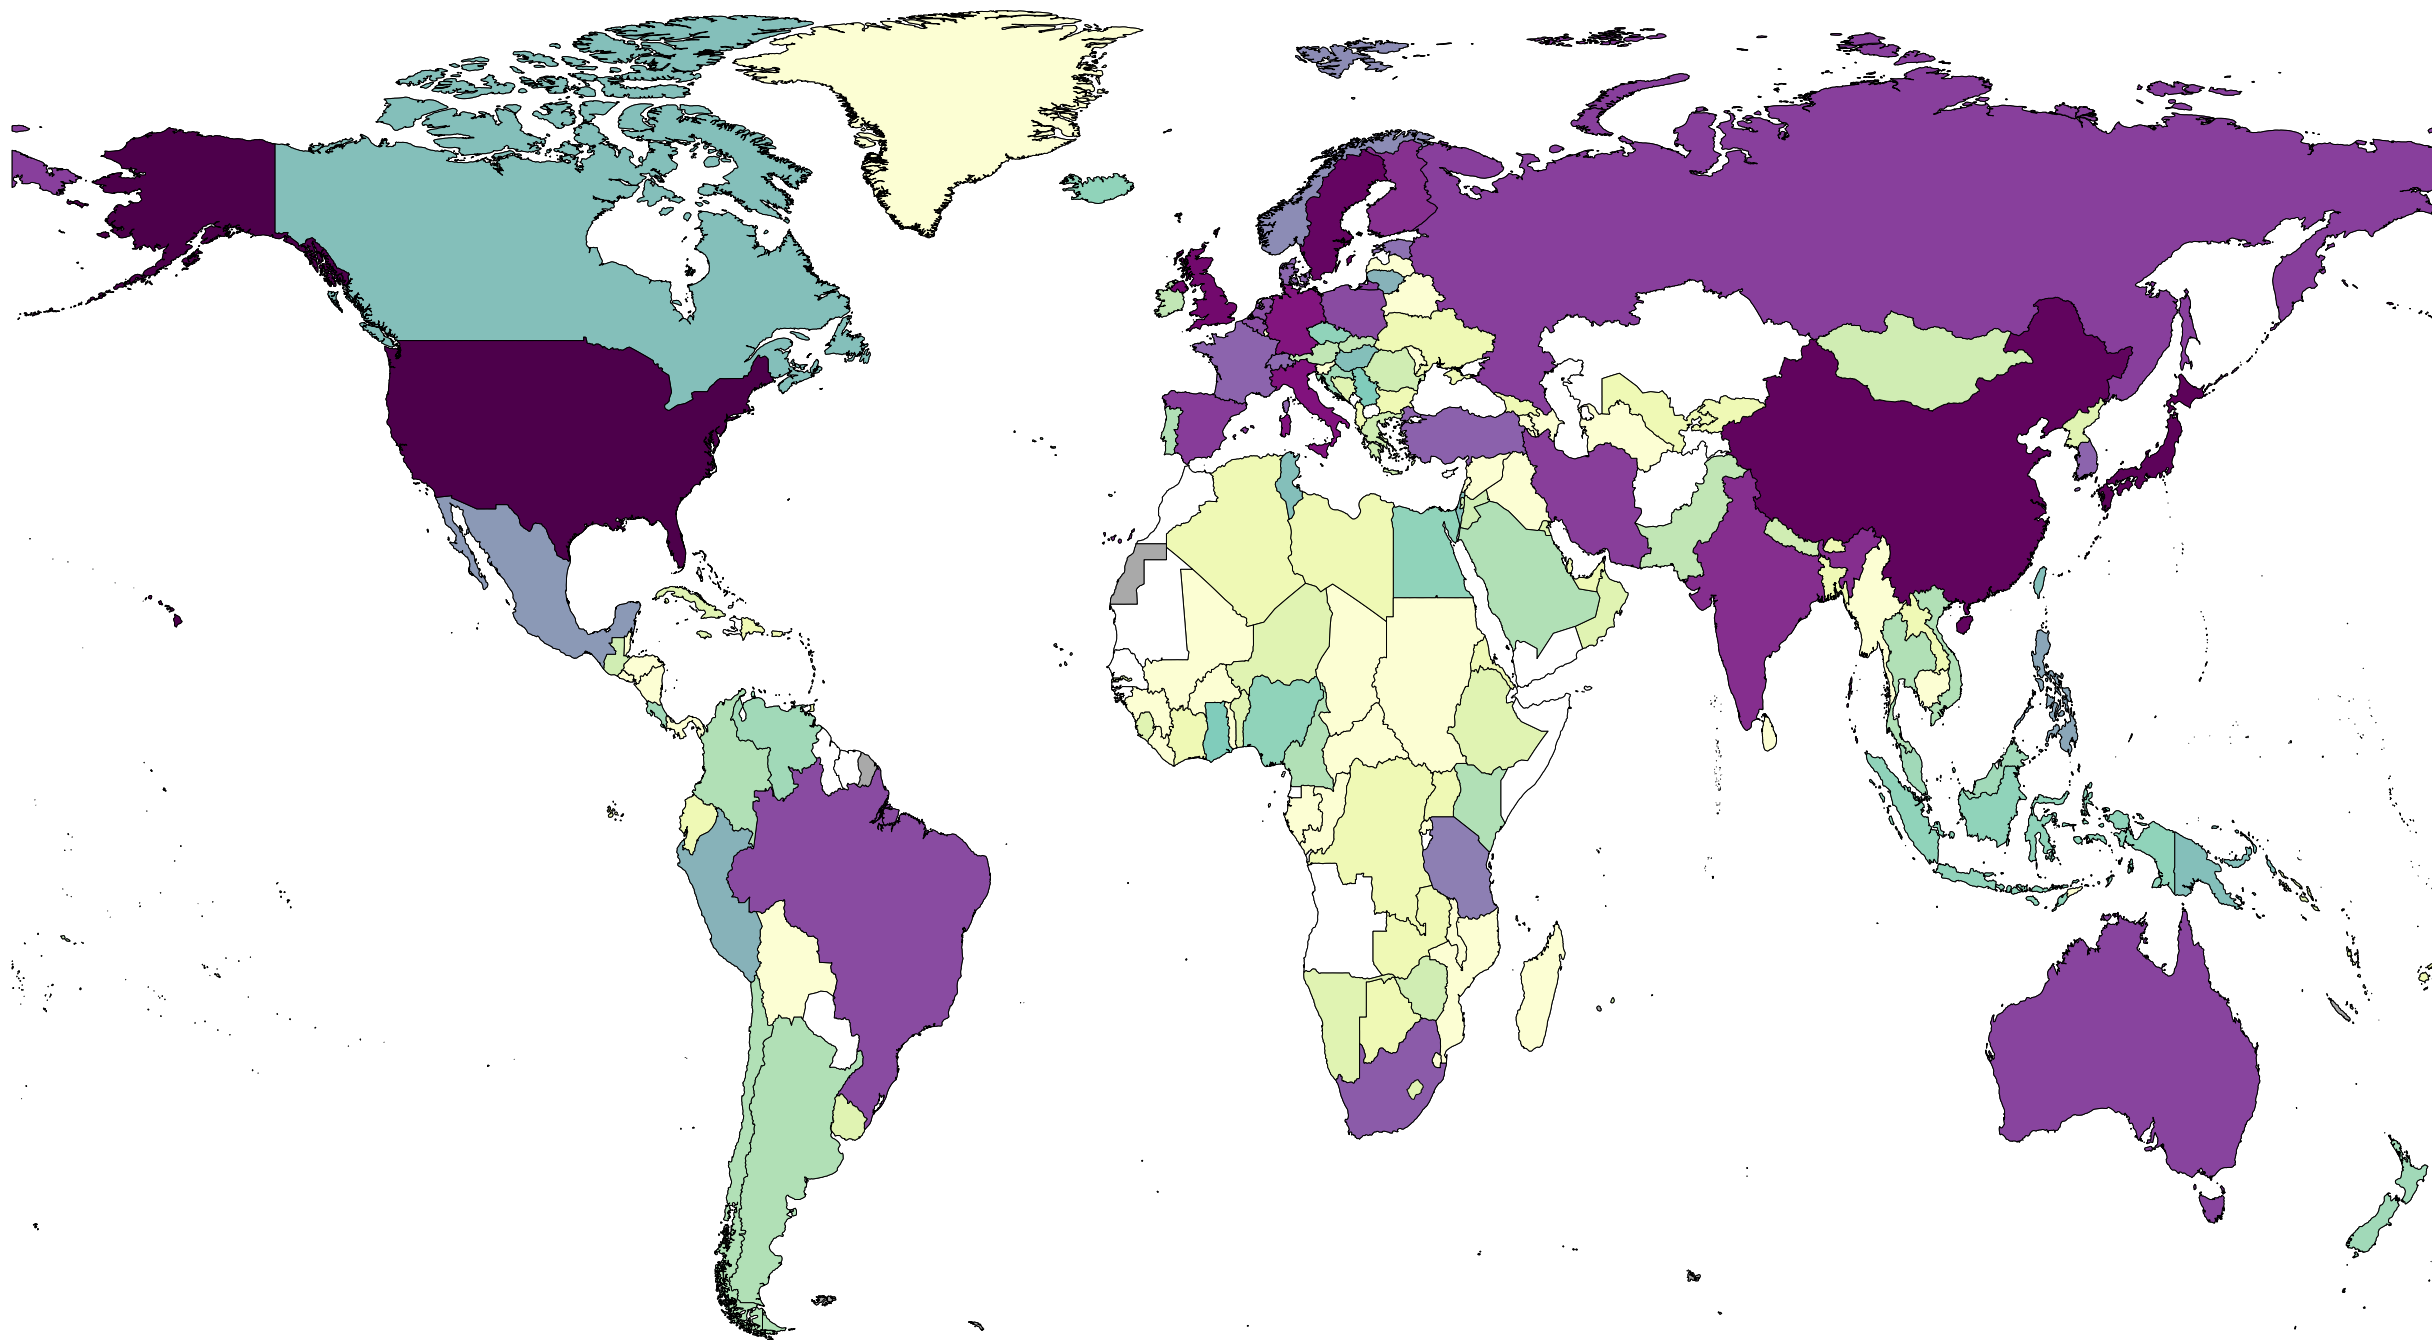

Sources

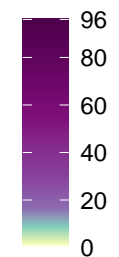

Caribbean

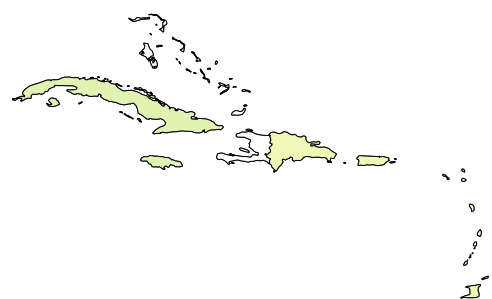

|                 |                  |                 |                   |            |                       |              |
|-----------------|------------------|-----------------|-------------------|------------|-----------------------|--------------|
| American Samoa  | Bahrain          | Bermuda         | Brunei Darussalam | Cabo Verde | Comoros               | Cook Islands |
| Fiji            | French Polynesia | F.S. Micronesia | Kiribati          | Maldives   | Marshall Islands      | Mauritius    |
| Montenegro      | Nauru            | Niue            | Palau             | Samoa      | Sao Tome and Principe | Seychelles   |
| Solomon Islands | Tokelau          | Tonga           | Tuvalu            | Vanuatu    |                       |              |

**Appendix Figure 3:** Number of data sources by region and year.

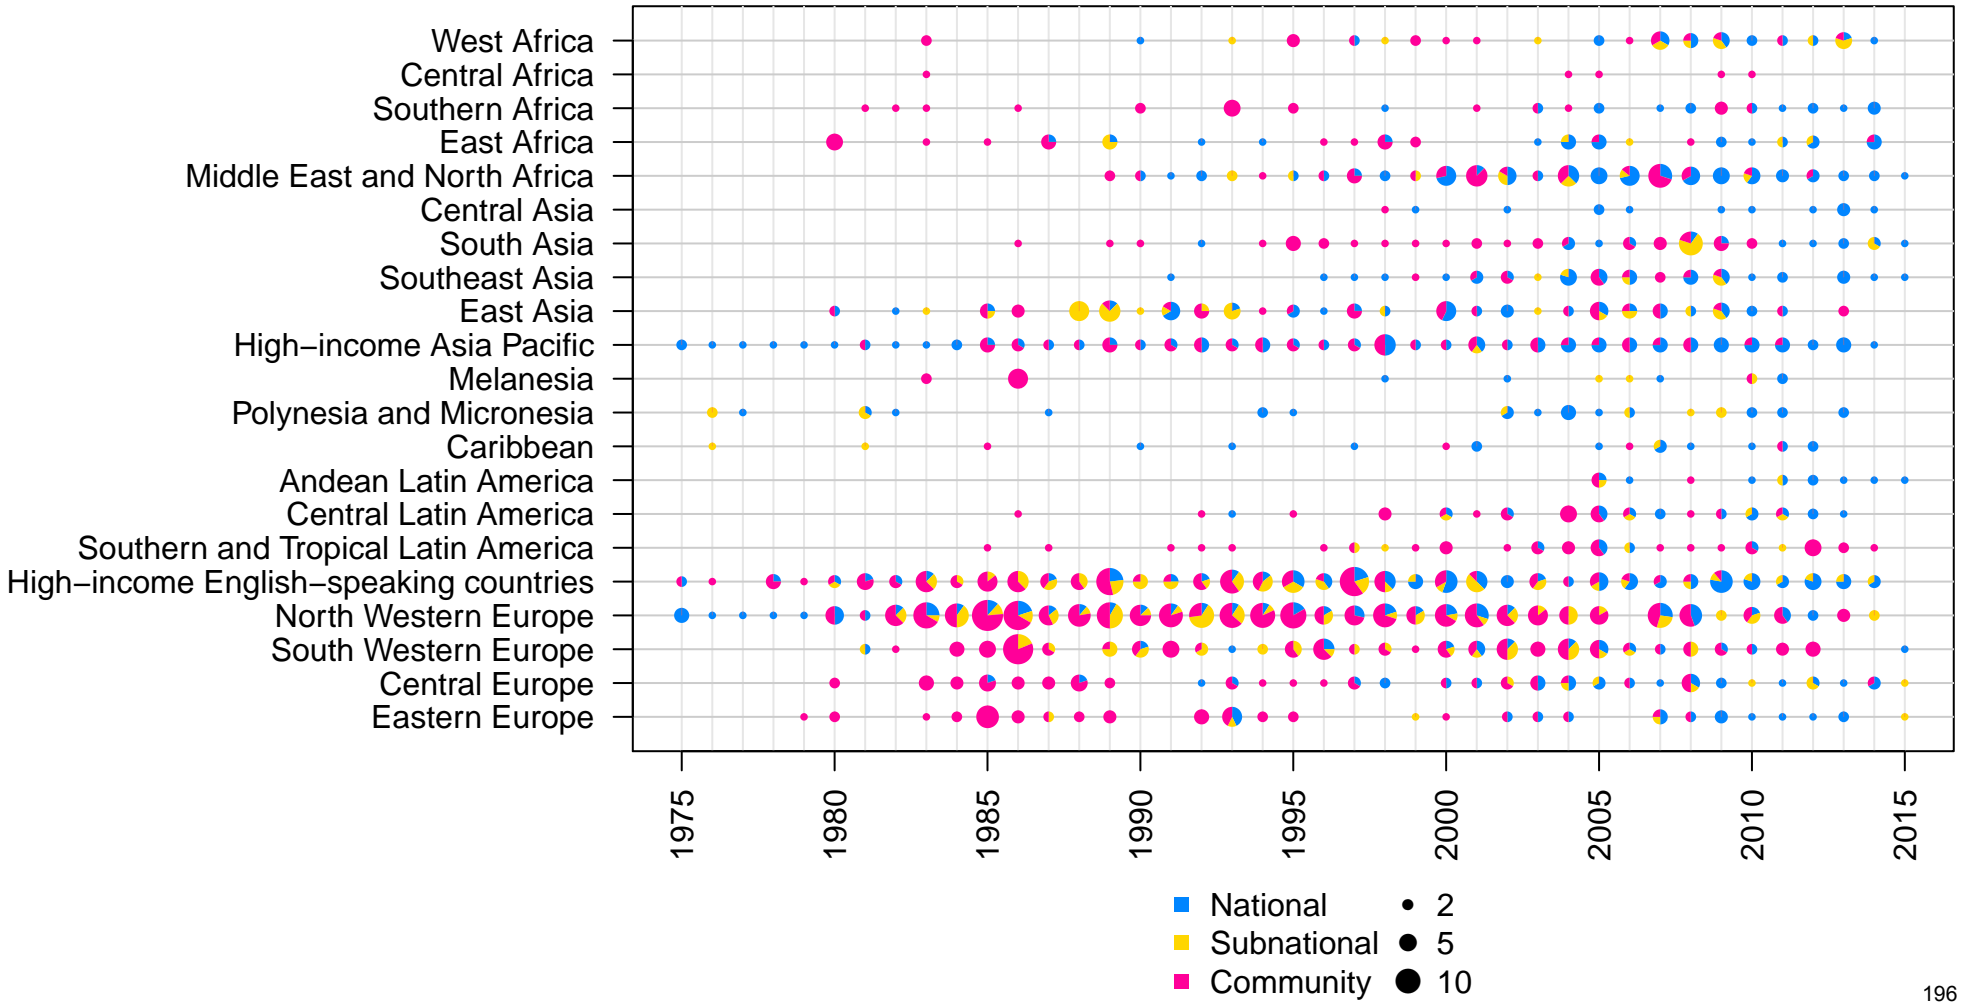

**Appendix Figure 4:** Comparison of age-standardised mean systolic blood pressure, mean diastolic blood pressure and prevalence of raised blood pressure in the main analysis, which used data from 1975 to 2015, with a sensitivity analysis using data from 1990 to 2015. Each point shows the age-standardised estimate for one country and sex.

### Systolic blood pressure

### Diastolic blood pressure

### Raised blood pressure

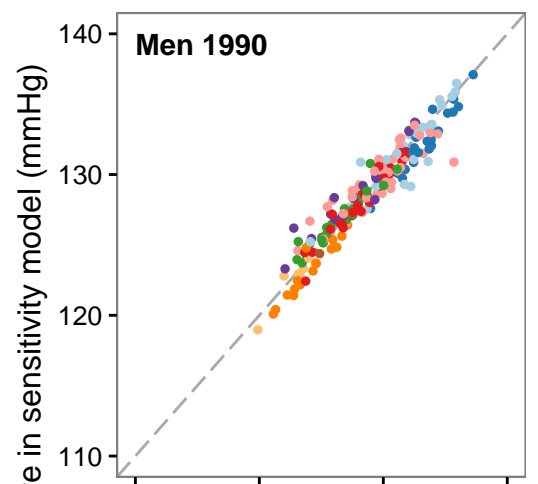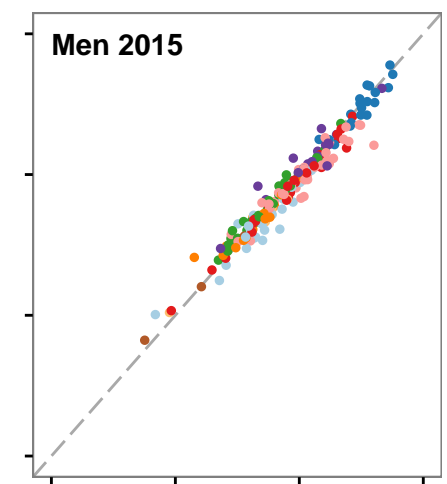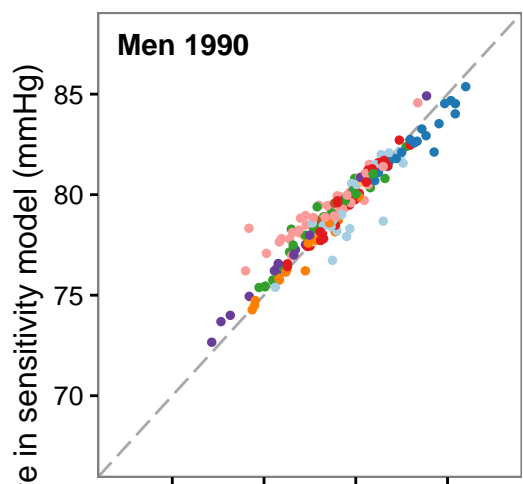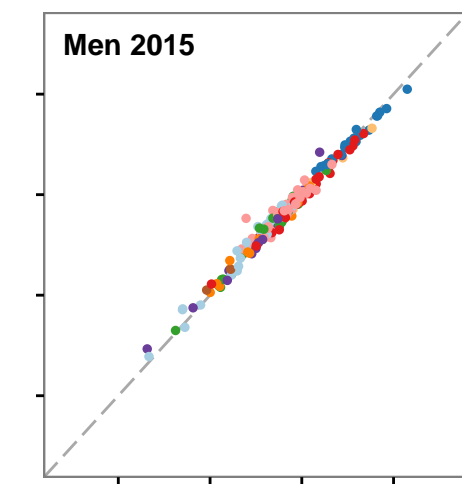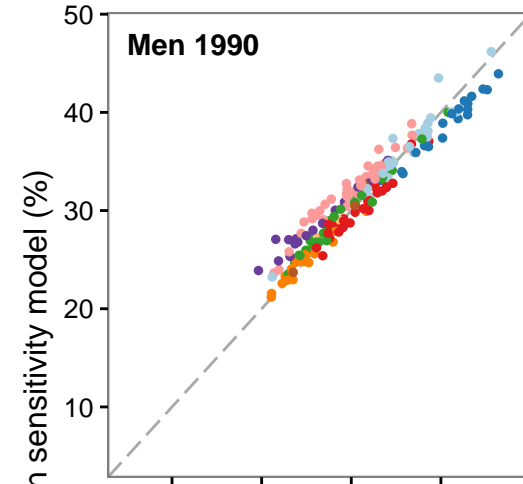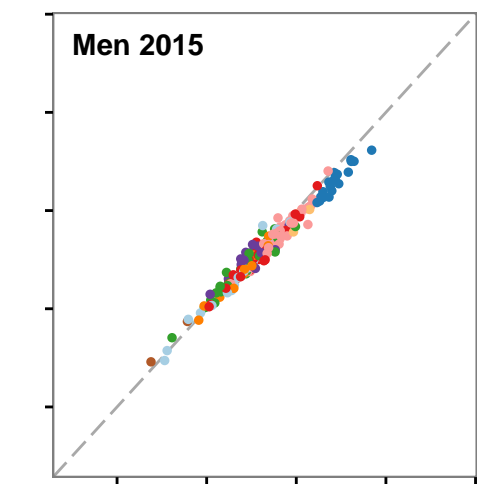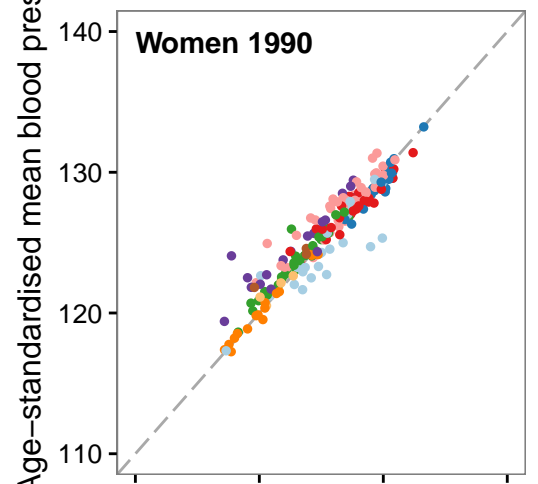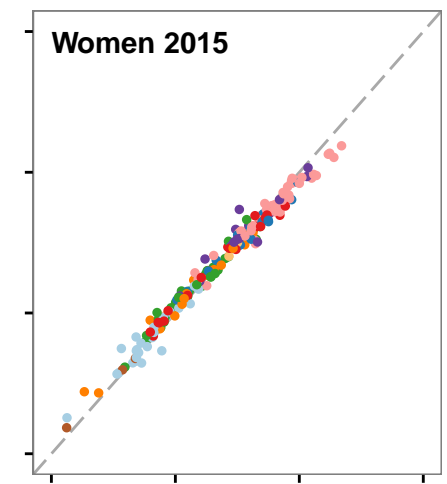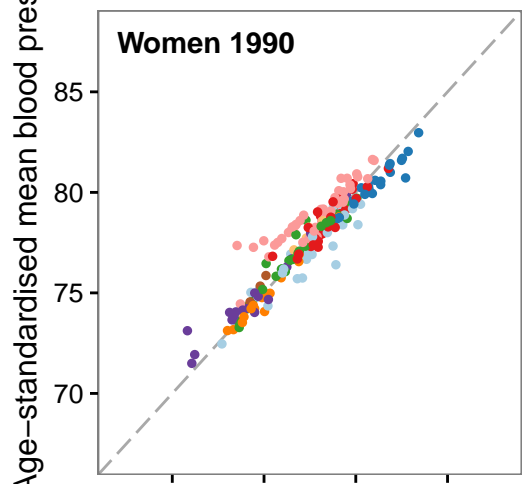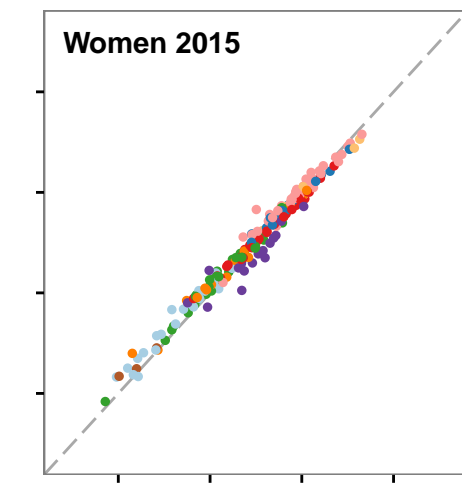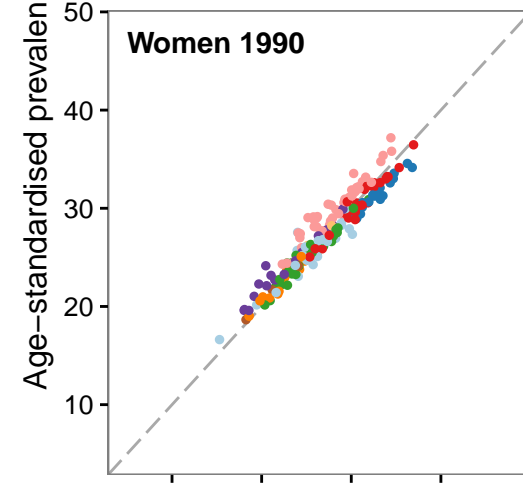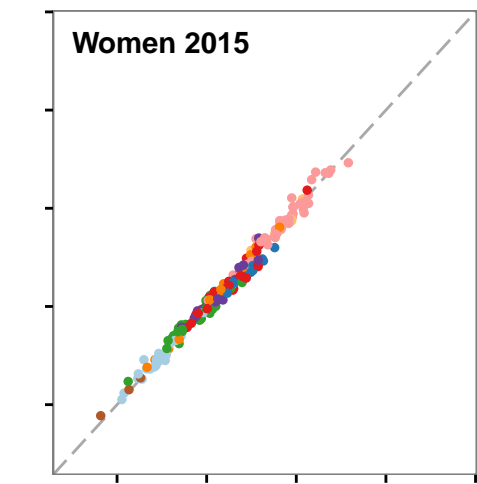

Age-standardised mean blood pressure in main model (mmHg)

Age-standardised mean blood pressure in main model (mmHg)

Age-standardised prevalence in main model (%)

- Central and Eastern Europe
- East and Southeast Asia
- High-income western
- Oceania
- Sub-Saharan Africa
- Central Asia, Middle East and North Africa
- High-income Asia Pacific
- Latin America and Caribbean
- South Asia



**Appendix Figure 5:** Trends in age-standardised mean systolic and diastolic blood pressure by sex and country in people aged 18 years and older. The lines show the posterior mean and the shaded area shows the 95% credible interval.

**Afghanistan**

South Asia

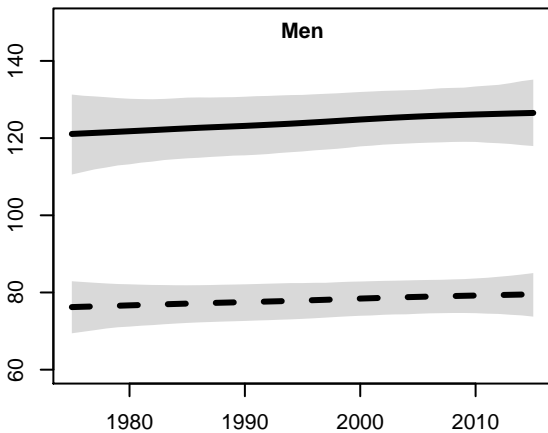**Afghanistan**

South Asia

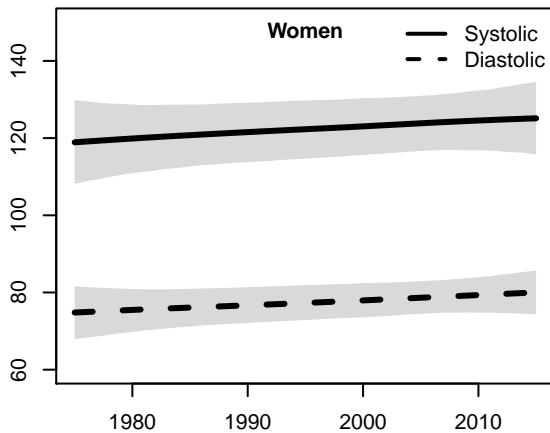**Albania**

Central Europe

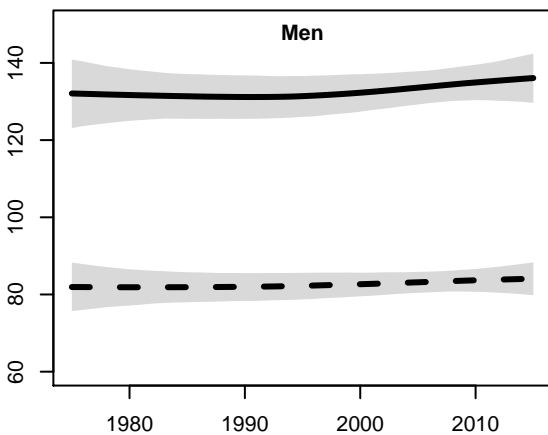**Albania**

Central Europe

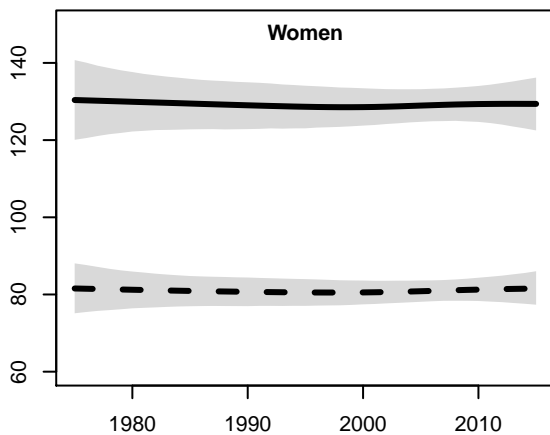**Algeria**

Middle East and North Africa

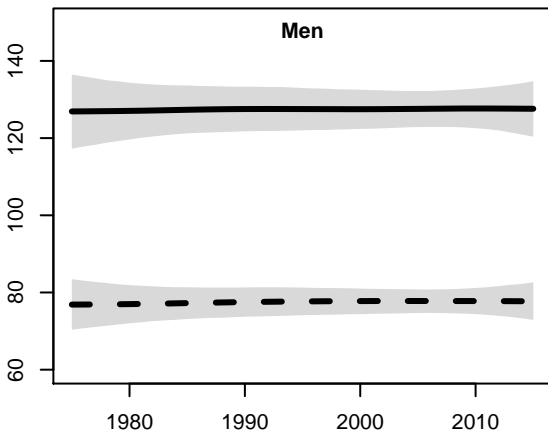**Algeria**

Middle East and North Africa

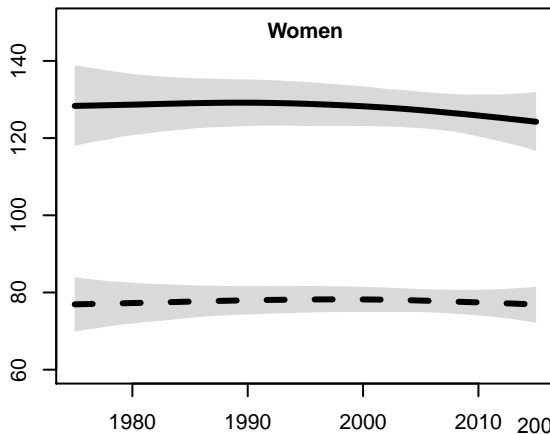

**American Samoa**  
Polynesia and Micronesia

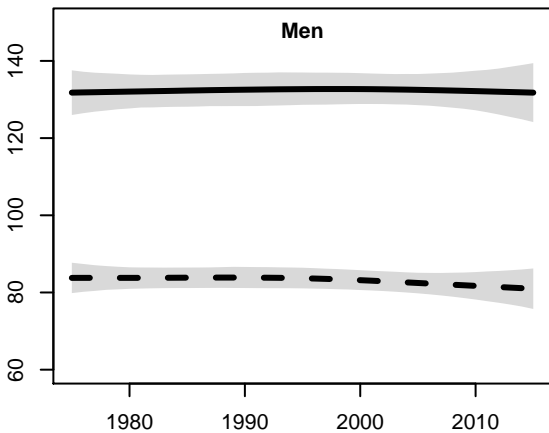

**American Samoa**  
Polynesia and Micronesia

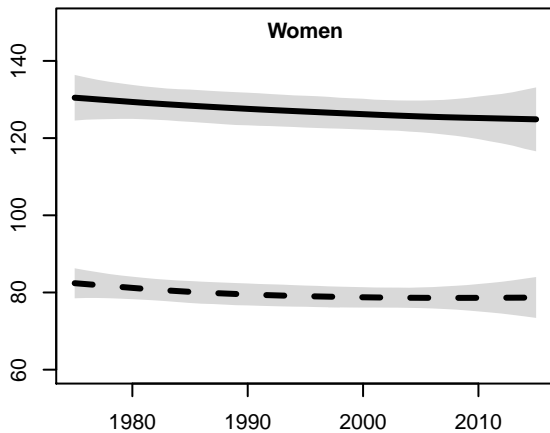

**Andorra**  
South Western Europe

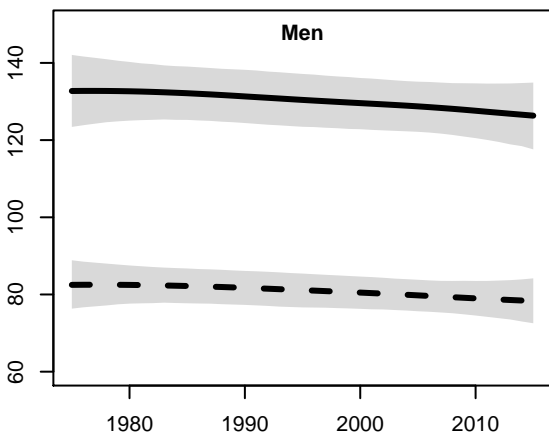

**Andorra**  
South Western Europe

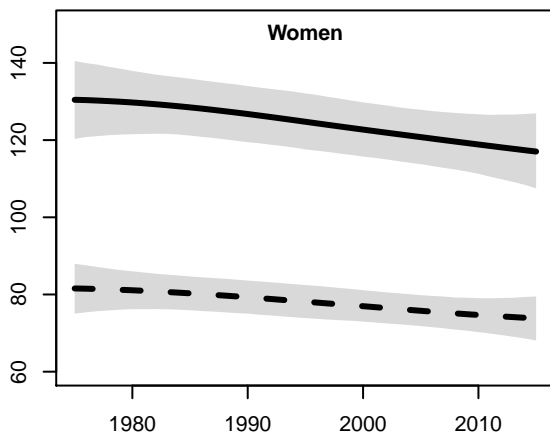

**Angola**  
Central Africa

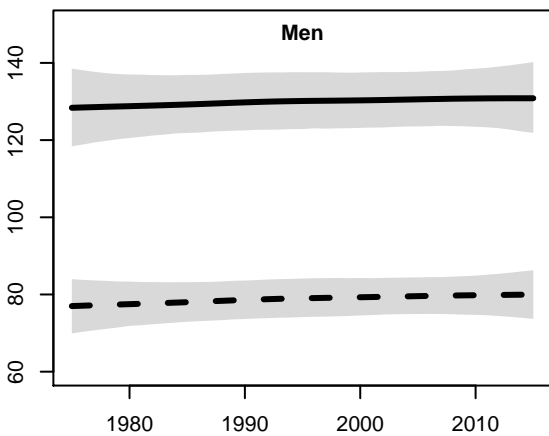

**Angola**  
Central Africa

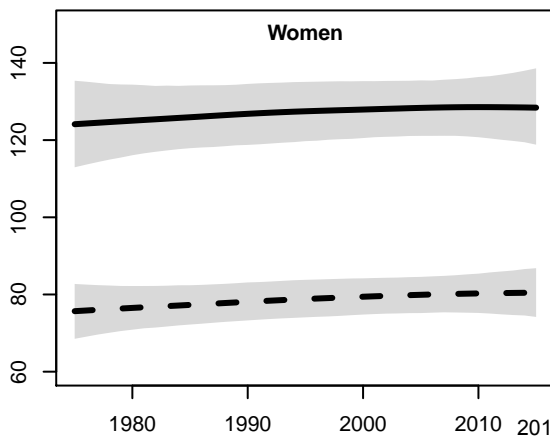

### Antigua and Barbuda

Caribbean

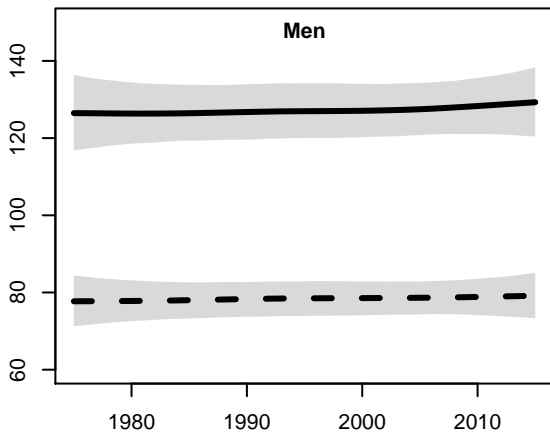

### Antigua and Barbuda

Caribbean

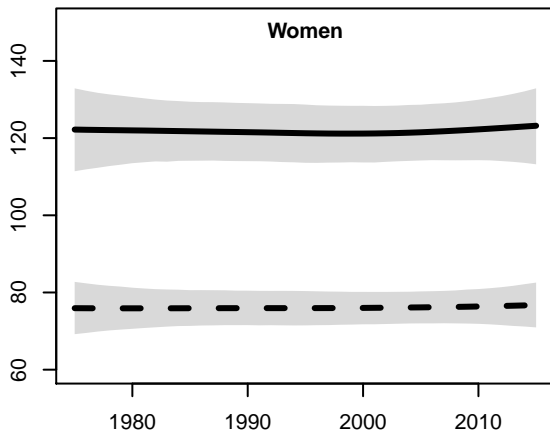

### Argentina

Southern and Tropical Latin America

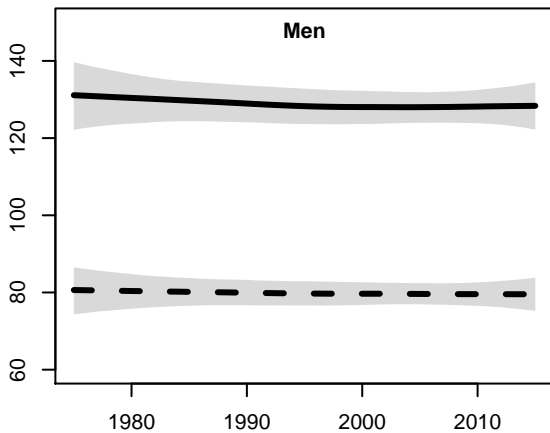

### Argentina

Southern and Tropical Latin America

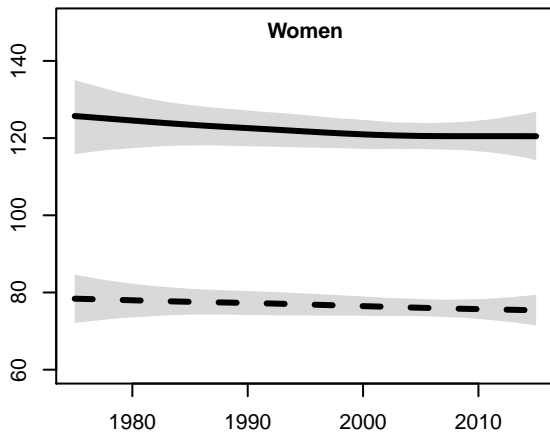

### Armenia

Central Asia

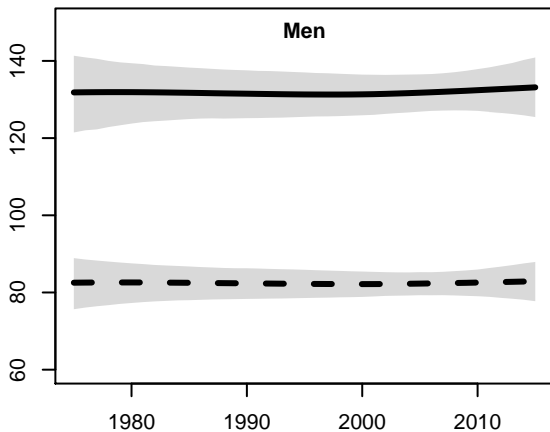

### Armenia

Central Asia

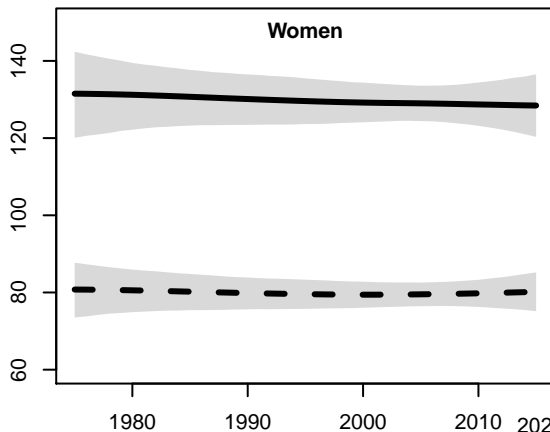

### Australia

High-income English-speaking countries

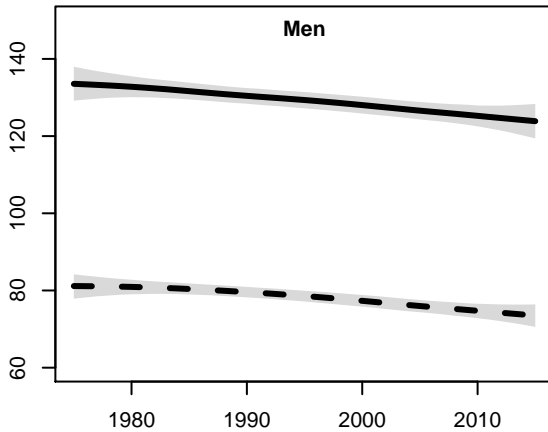

High-income English-speaking countries

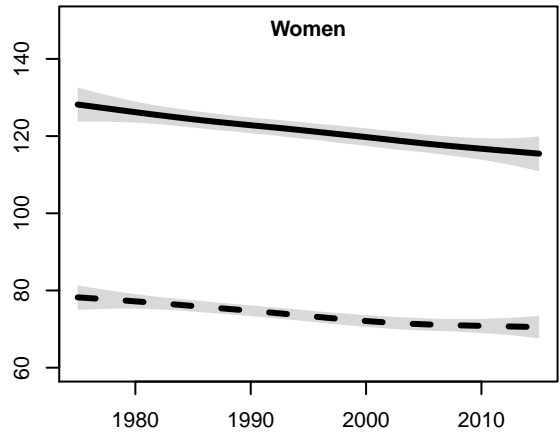

### Austria

North Western Europe

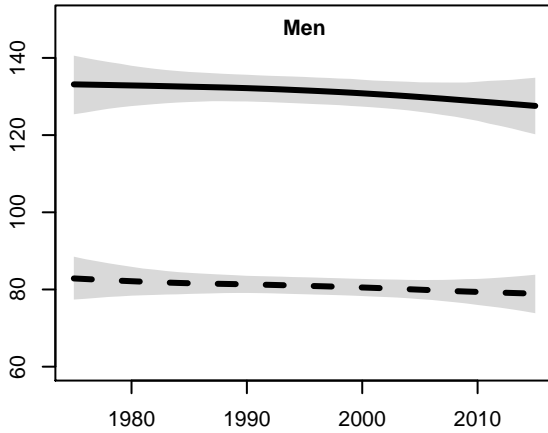

### Austria

North Western Europe

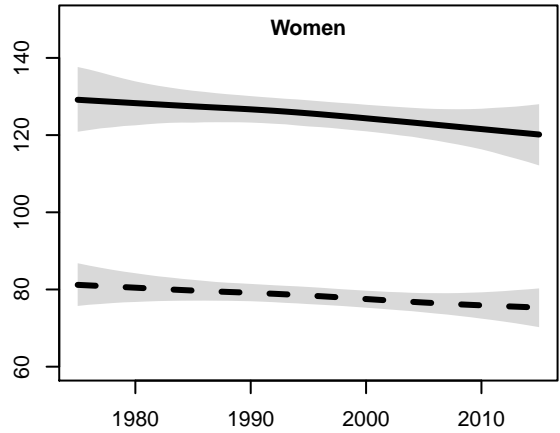

### Azerbaijan

Central Asia

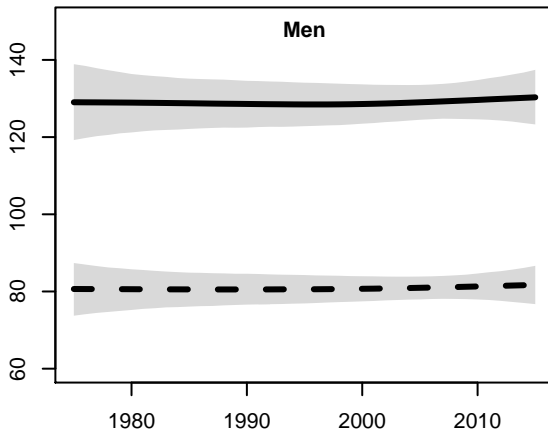

### Azerbaijan

Central Asia

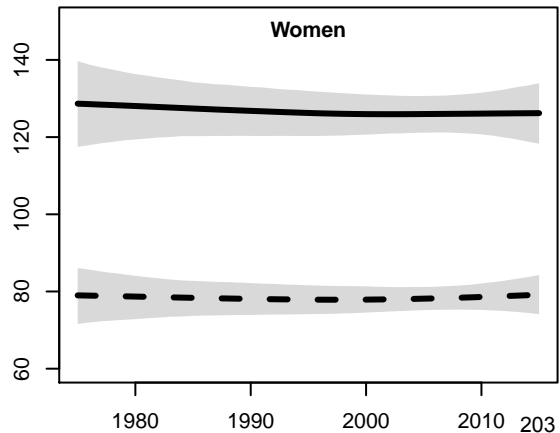

Age-standardised mean blood pressure (mmHg)

203

**Bahamas**  
Caribbean

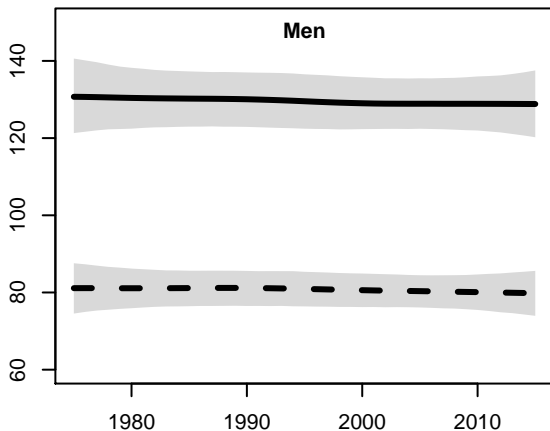

**Bahamas**  
Caribbean

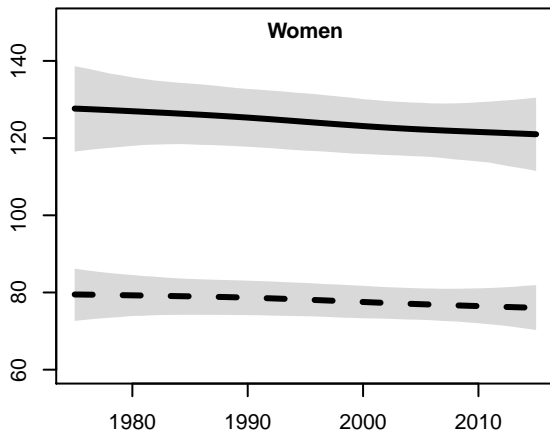

**Bahrain**  
Middle East and North Africa

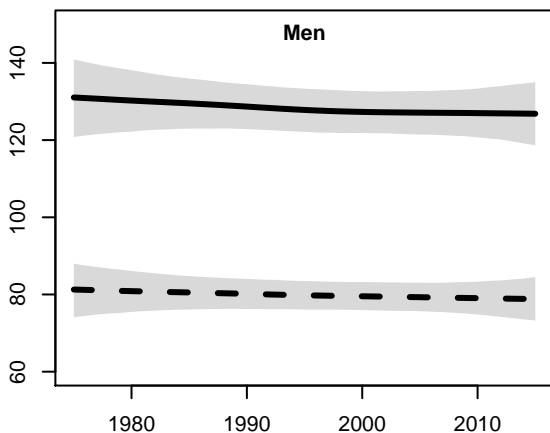

**Bahrain**  
Middle East and North Africa

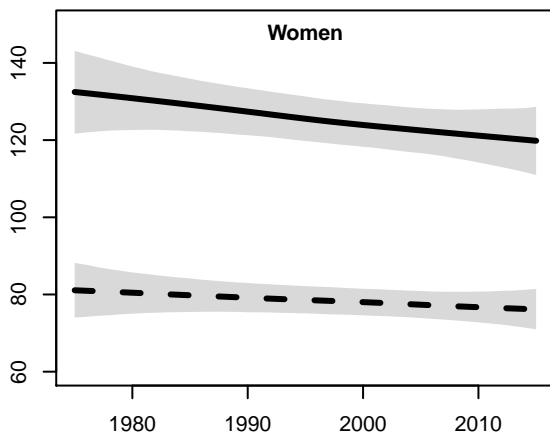

**Bangladesh**  
South Asia

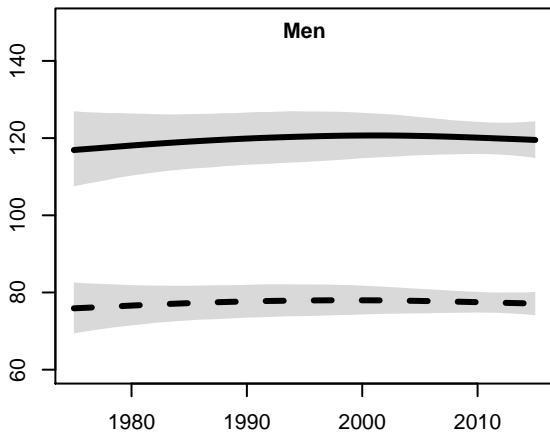

**Bangladesh**  
South Asia

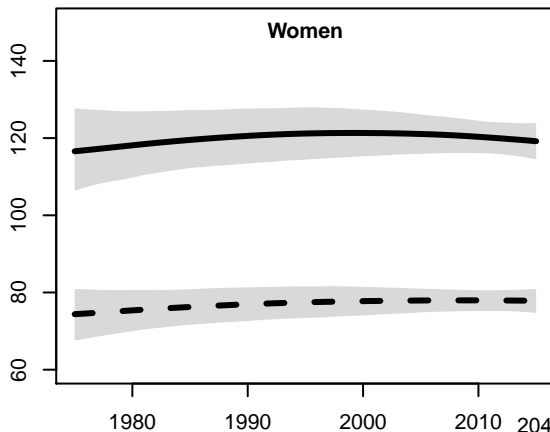

**Barbados**

Caribbean

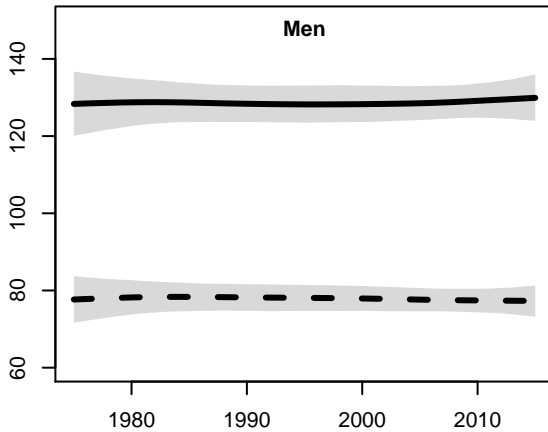**Barbados**

Caribbean

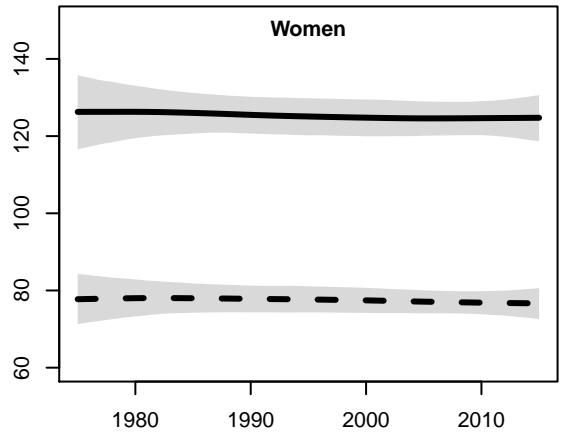**Belarus**

Eastern Europe

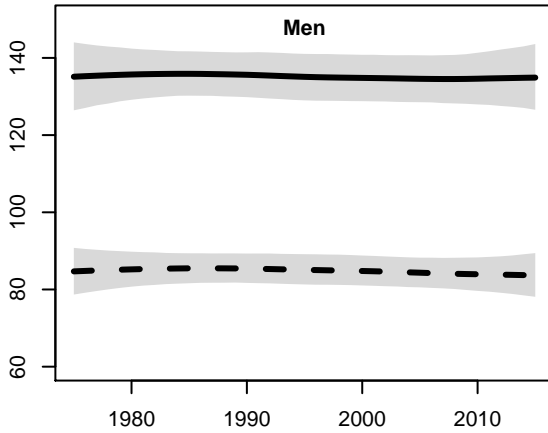**Belarus**

Eastern Europe

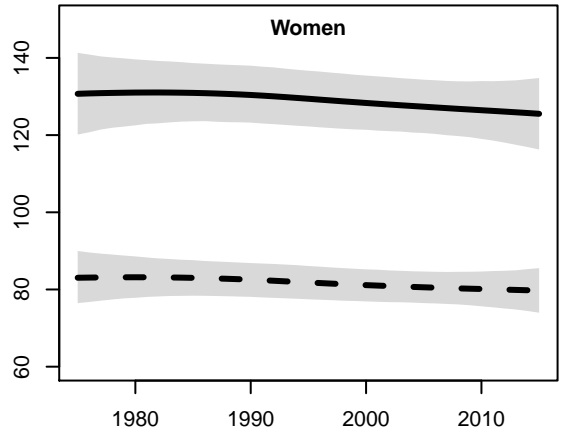**Belgium**

North Western Europe

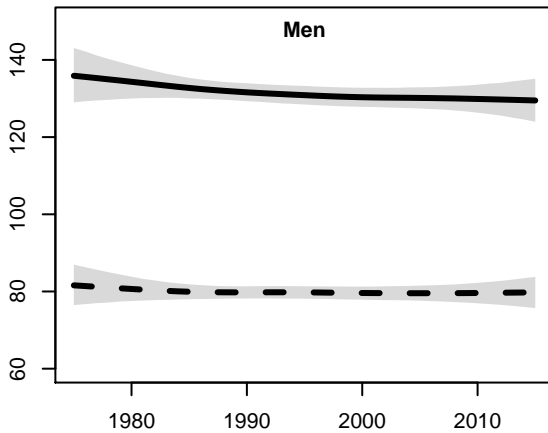**Belgium**

North Western Europe

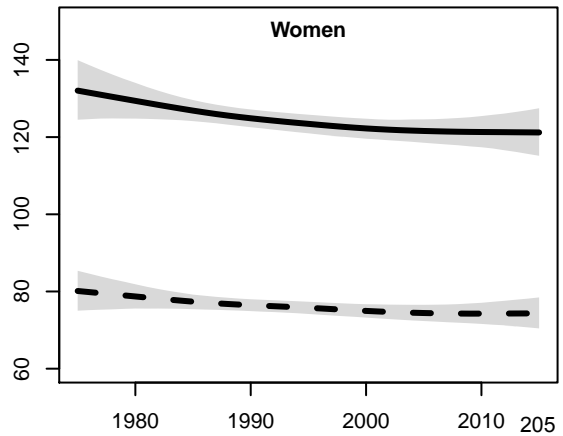

**Belize**  
Caribbean

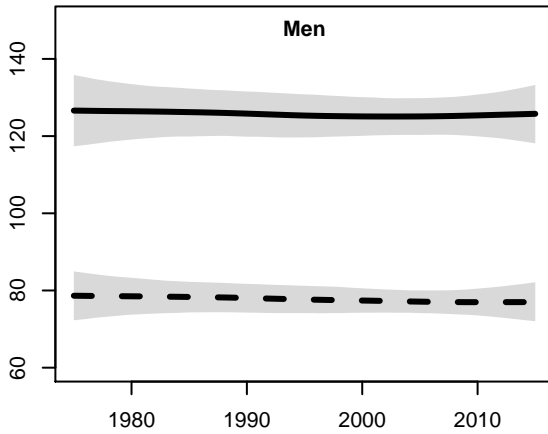

**Belize**  
Caribbean

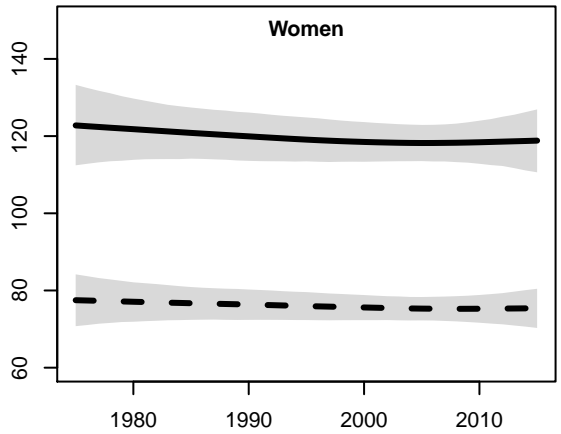

**Benin**  
West Africa

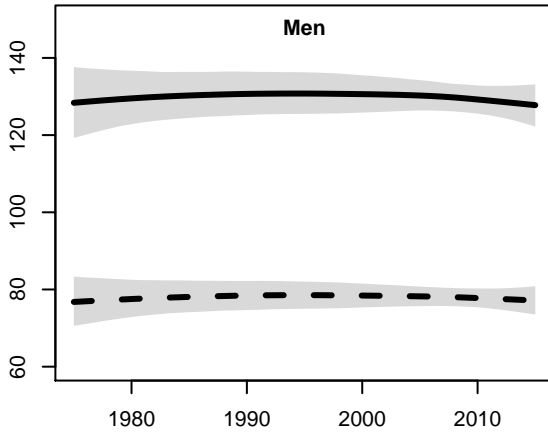

**Benin**  
West Africa

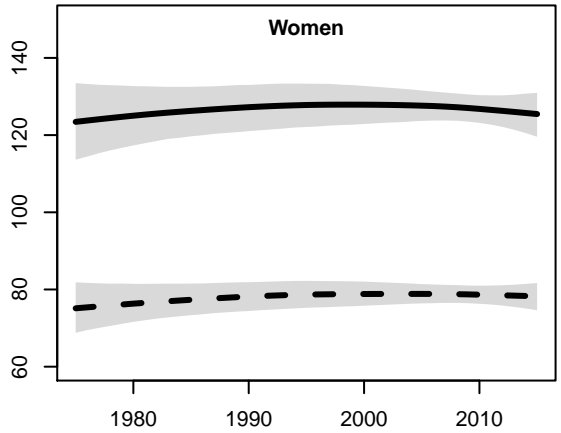

**Bermuda**  
Caribbean

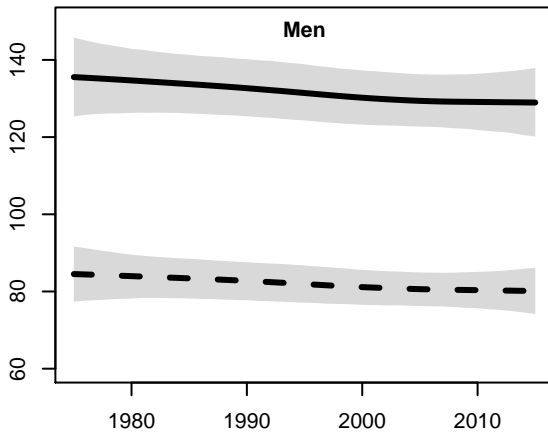

**Bermuda**  
Caribbean

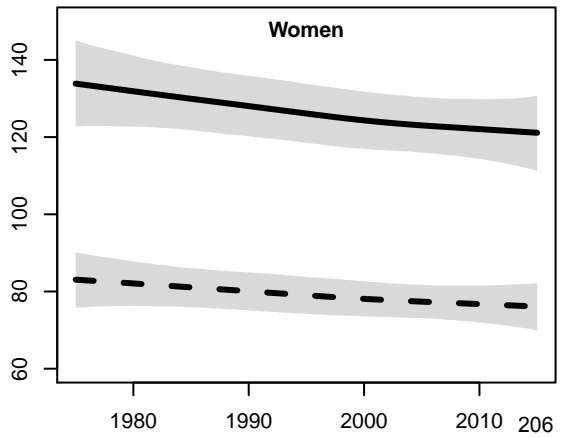



**Bhutan**  
South Asia

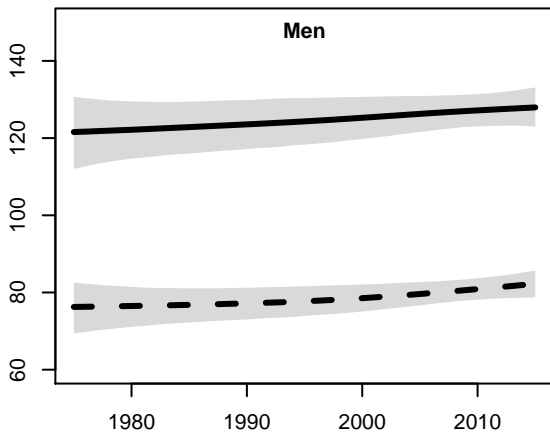

**Bhutan**  
South Asia

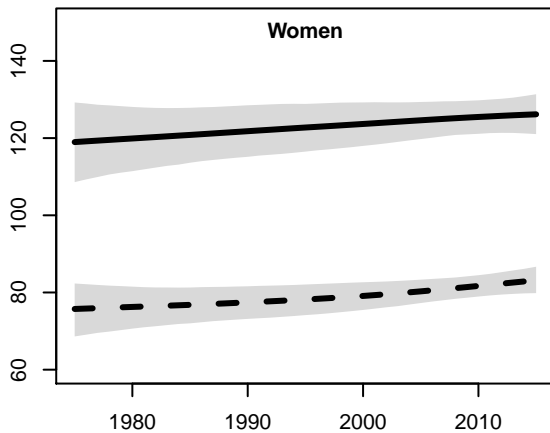

**Bolivia**  
Andean Latin America

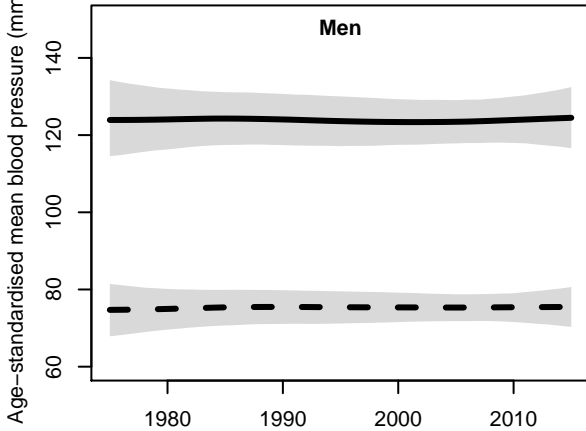

**Bolivia**  
Andean Latin America

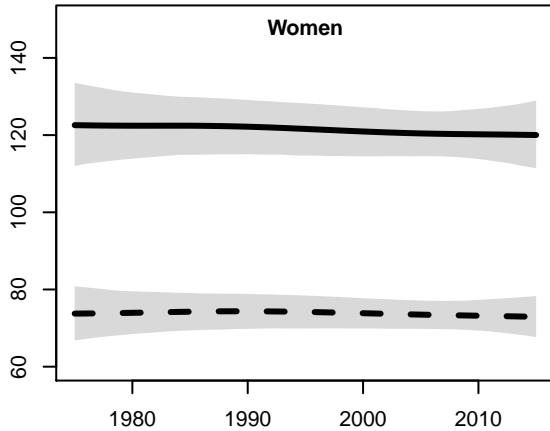

**Bosnia and Herzegovina**  
Central Europe

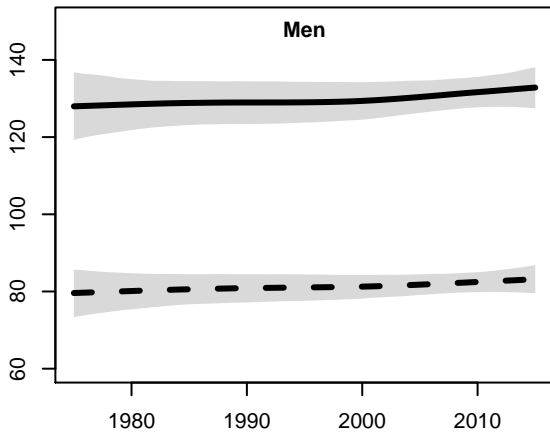

**Bosnia and Herzegovina**  
Central Europe

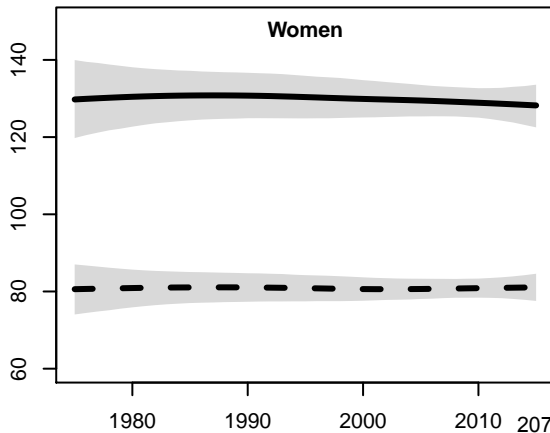

**Botswana**  
Southern Africa

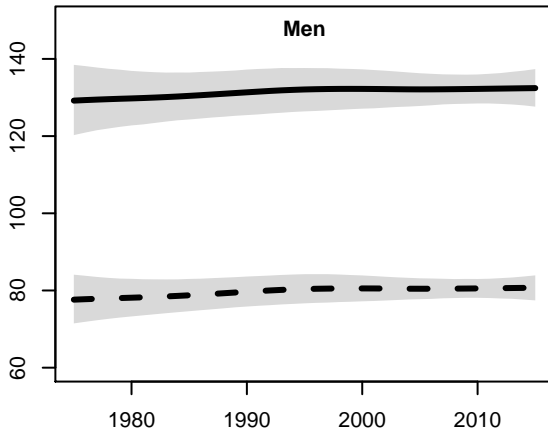

**Botswana**  
Southern Africa

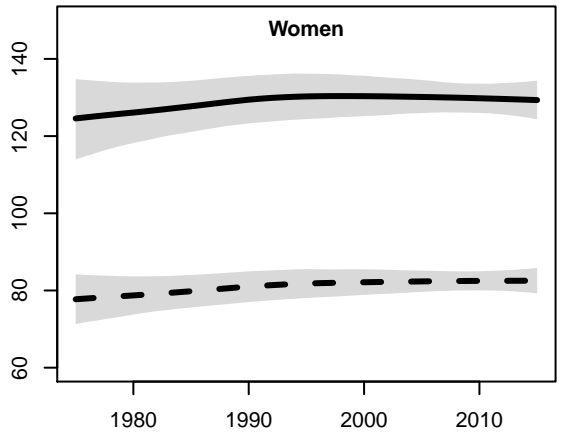

**Brazil**  
Southern and Tropical Latin America

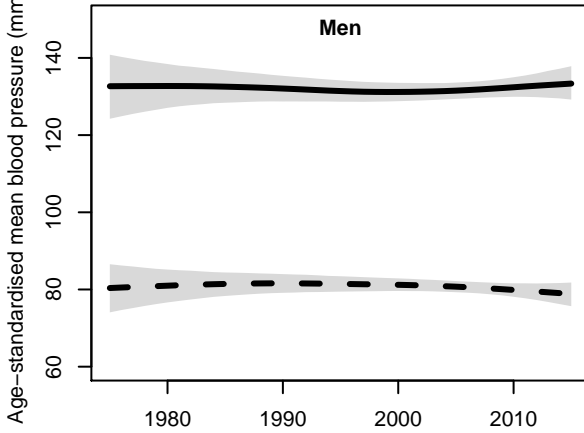

**Brazil**  
Southern and Tropical Latin America

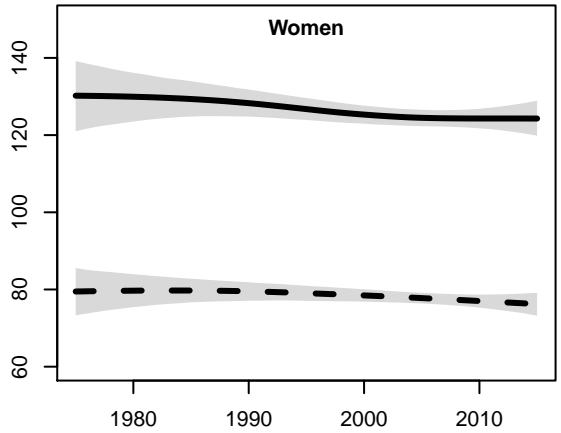

**Brunei Darussalam**  
Southeast Asia

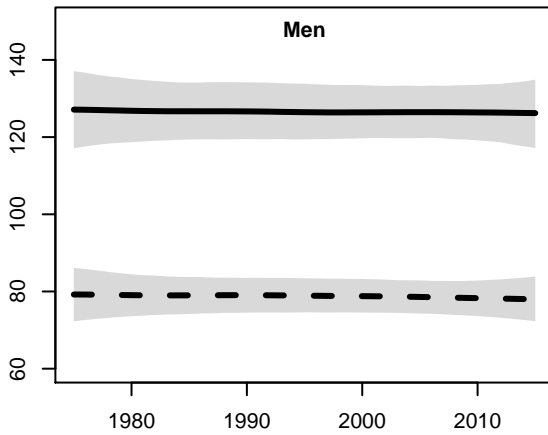

**Brunei Darussalam**  
Southeast Asia

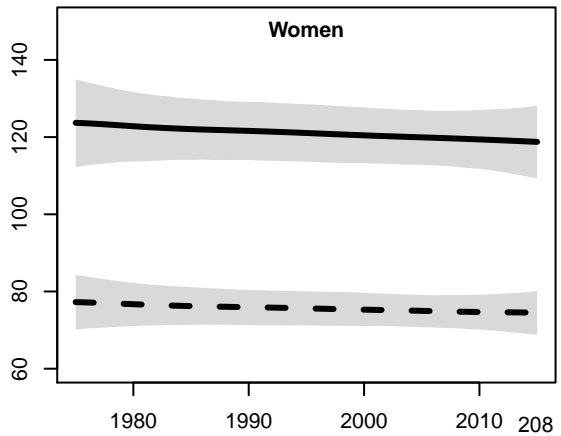

### Bulgaria

Central Europe

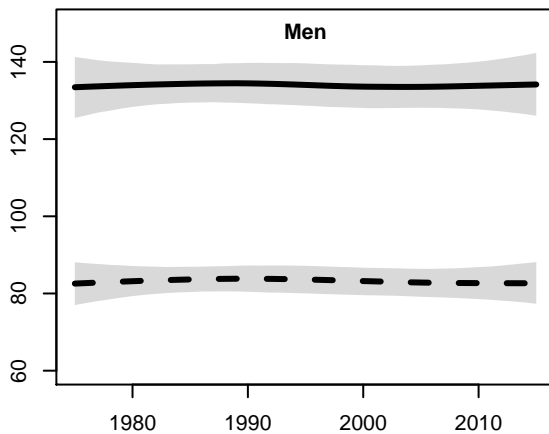

### Bulgaria

Central Europe

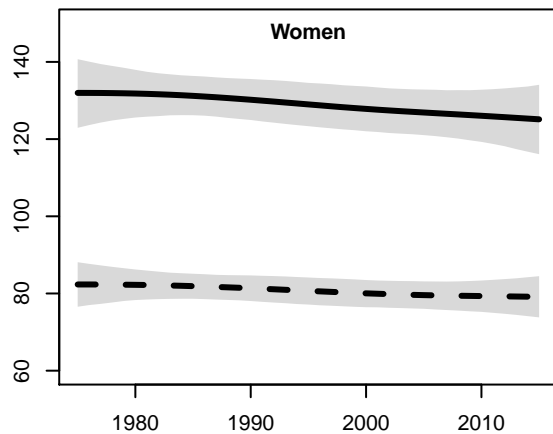

### Burkina Faso

West Africa

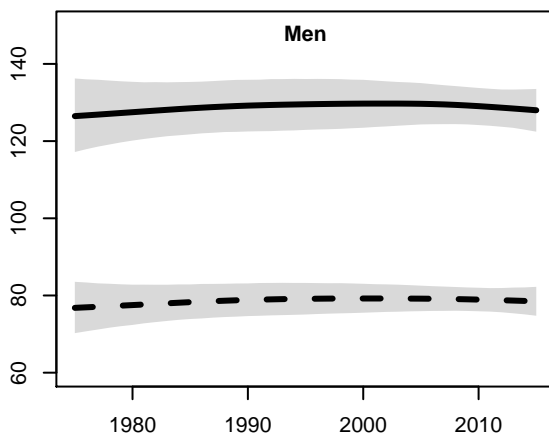

### Burkina Faso

West Africa

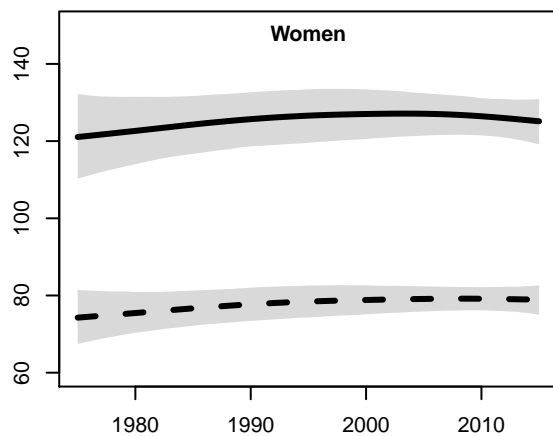

### Burundi

East Africa

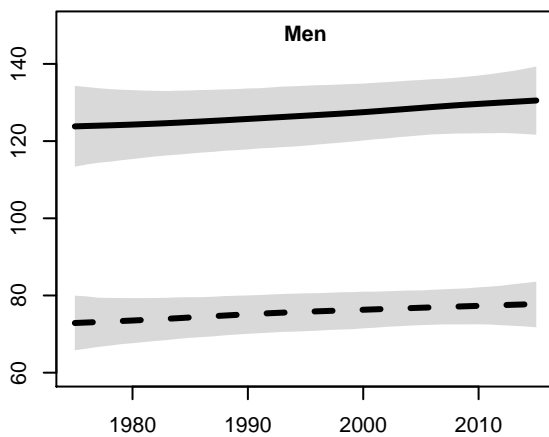

### Burundi

East Africa

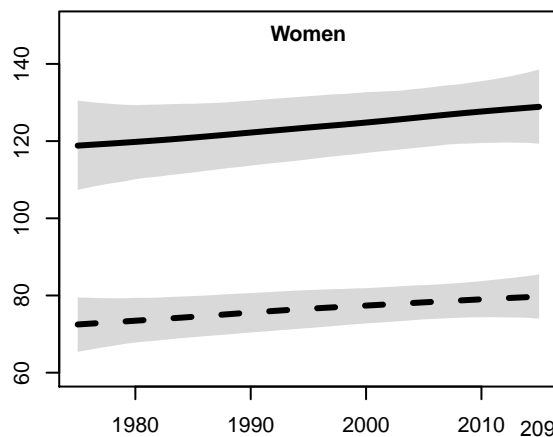

**Cabo Verde**

West Africa

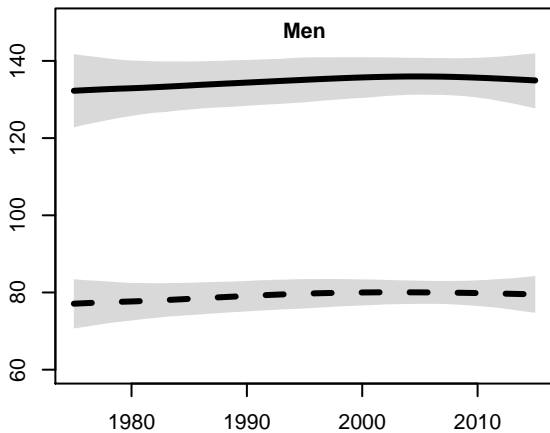**Cabo Verde**

West Africa

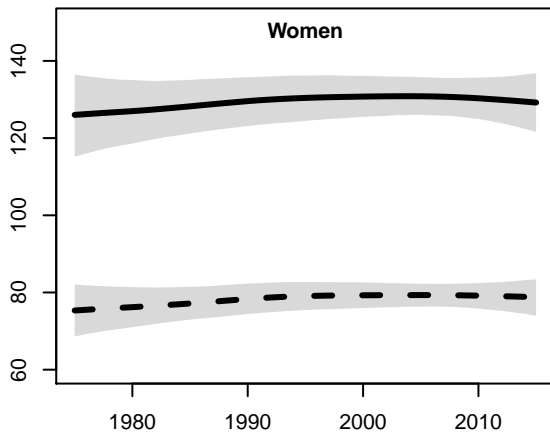**Cambodia**

Southeast Asia

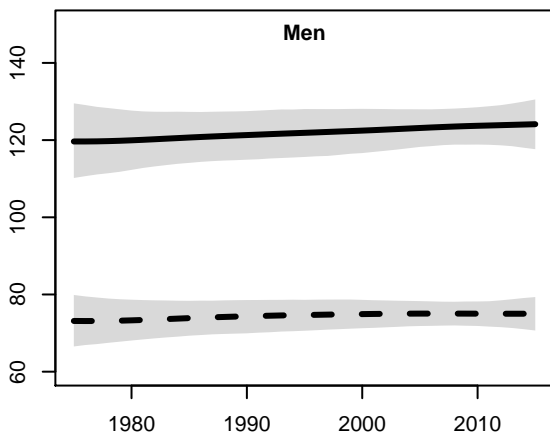**Cambodia**

Southeast Asia

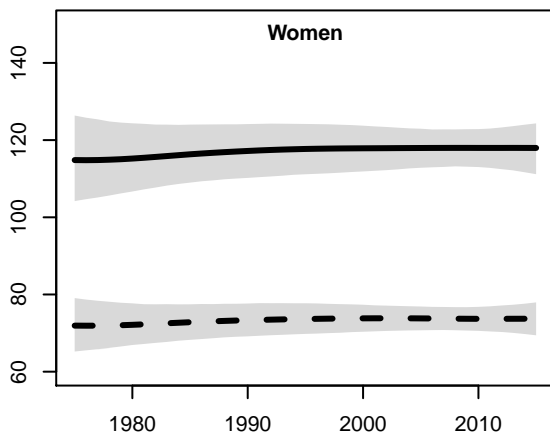**Cameroon**

West Africa

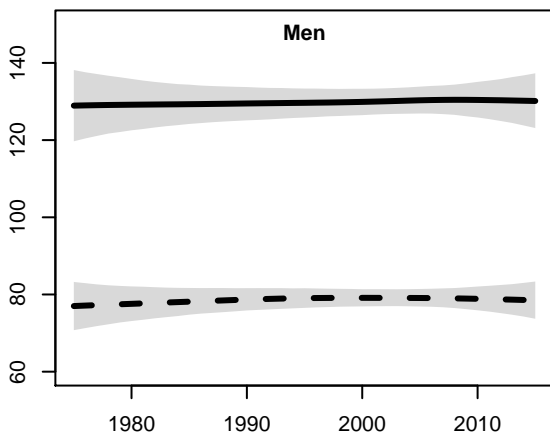**Cameroon**

West Africa

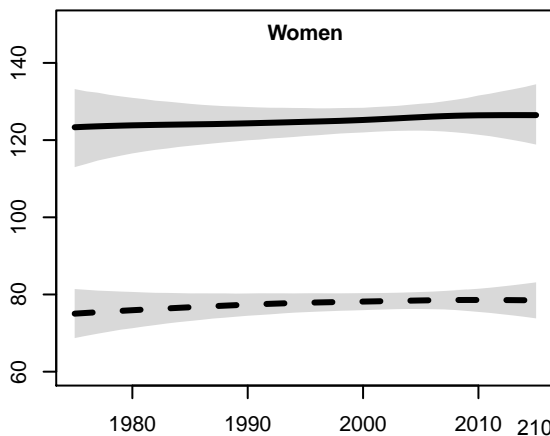

### Canada

High-income English-speaking countries

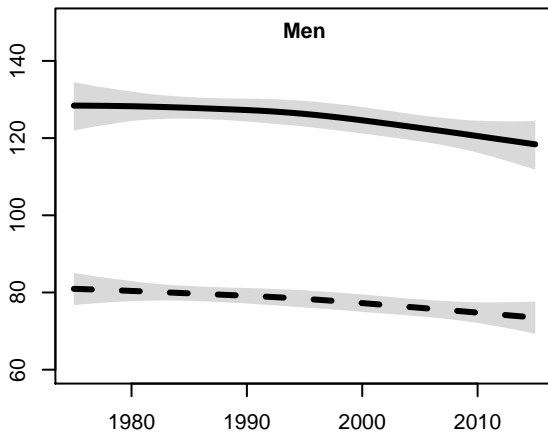

### Canada

High-income English-speaking countries

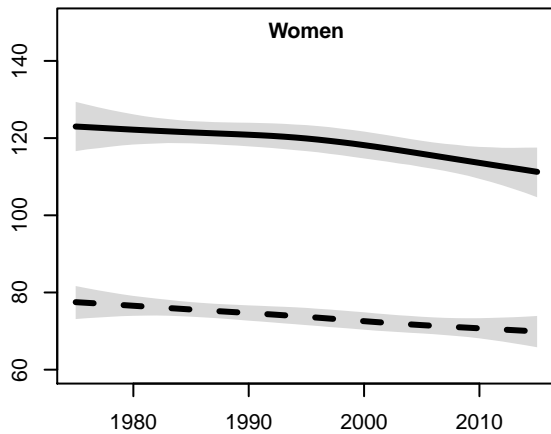

### Central African Republic

Central Africa

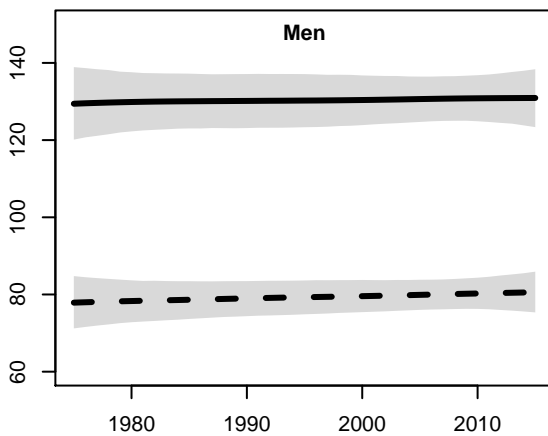

### Central African Republic

Central Africa

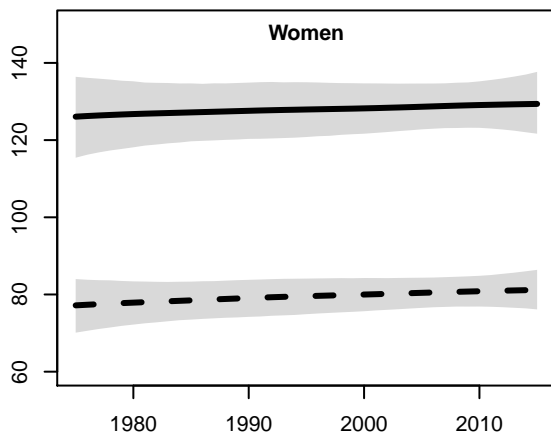

### Chad

West Africa

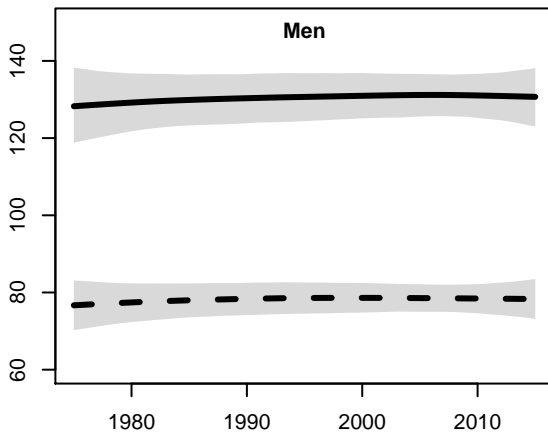

### Chad

West Africa

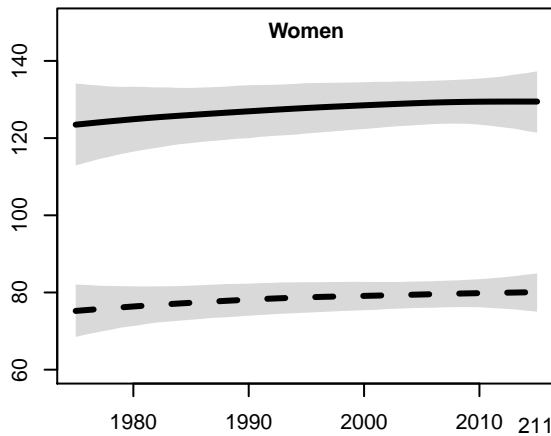

Age-standardised mean blood pressure (mmHg)

### Chile

Southern and Tropical Latin America

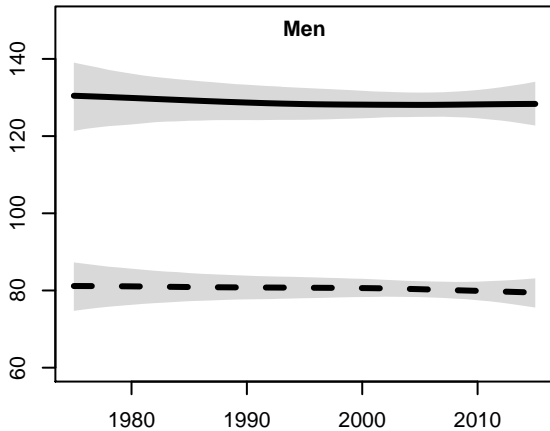

Southern and Tropical Latin America

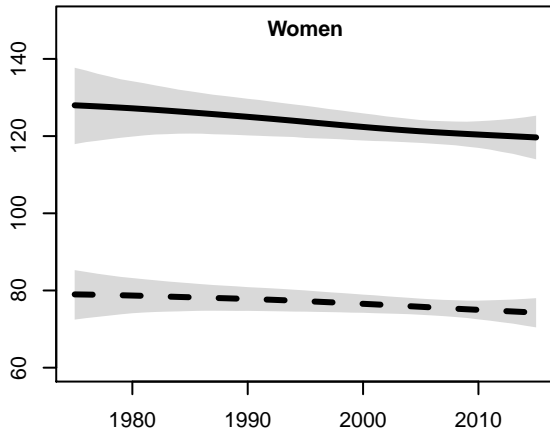

### China

East Asia

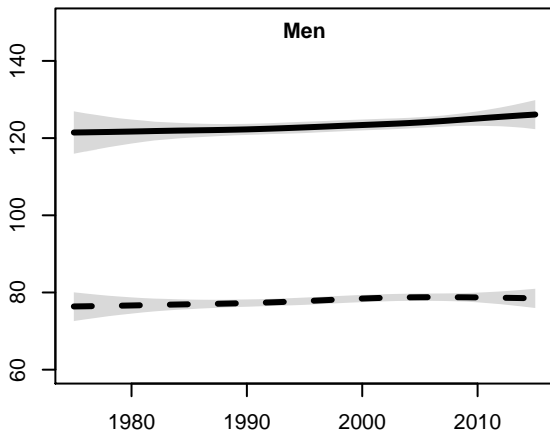

### China

East Asia

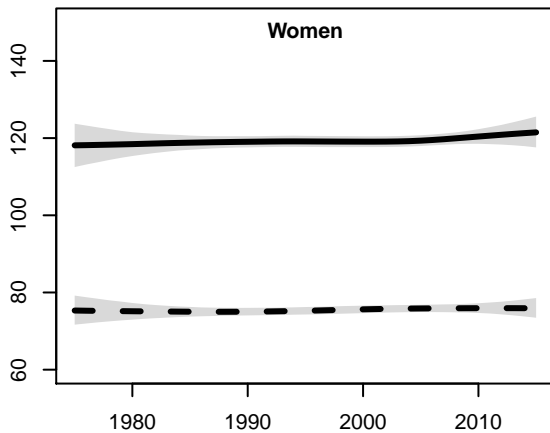

### China (Hong Kong SAR)

East Asia

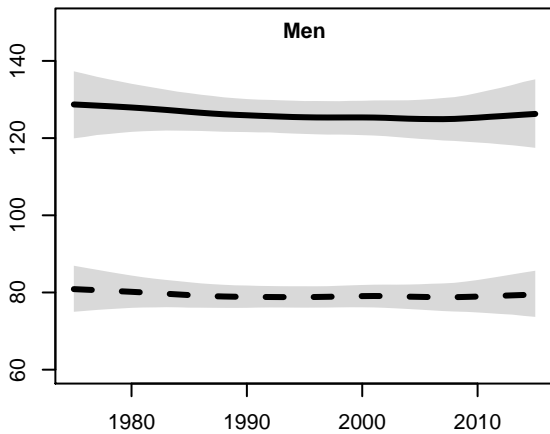

### China (Hong Kong SAR)

East Asia

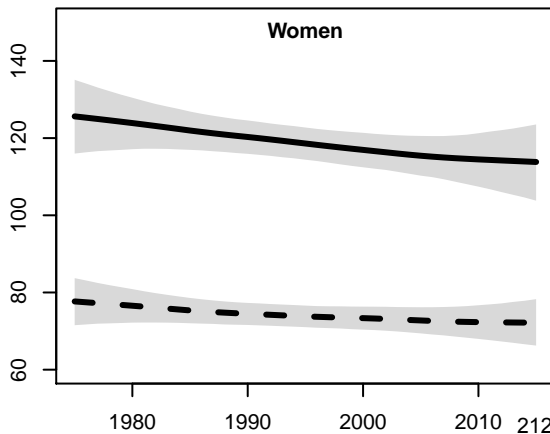

**Colombia**  
Central Latin America

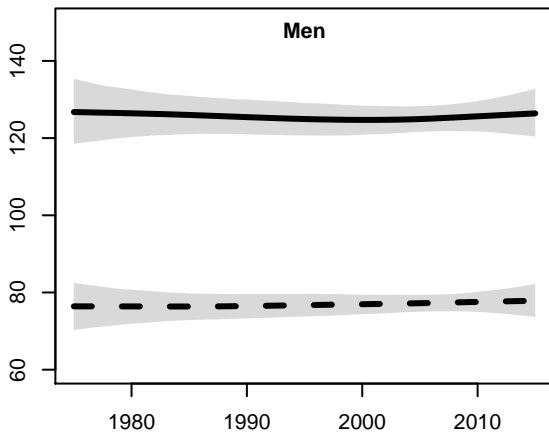

**Colombia**  
Central Latin America

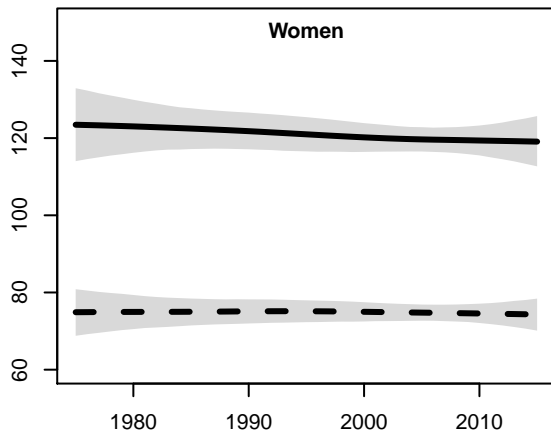

**Comoros**  
East Africa

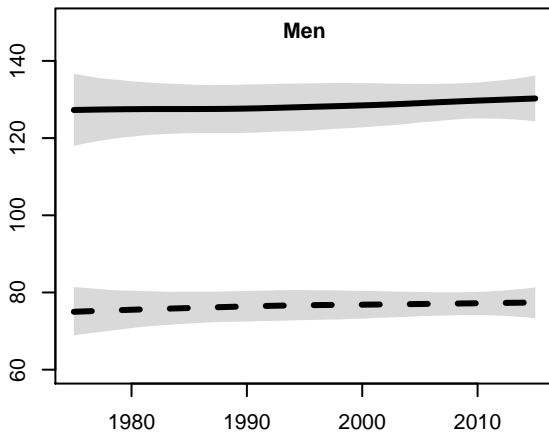

**Comoros**  
East Africa

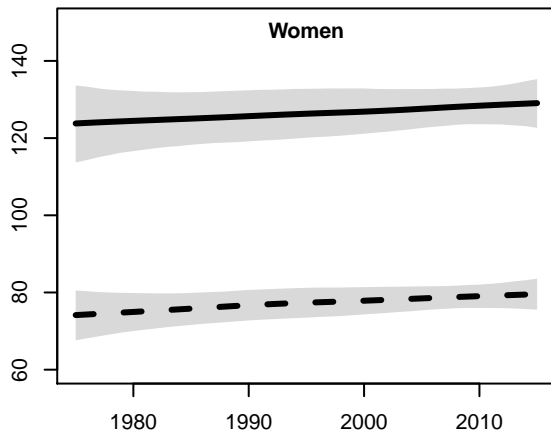

**Congo**  
Central Africa

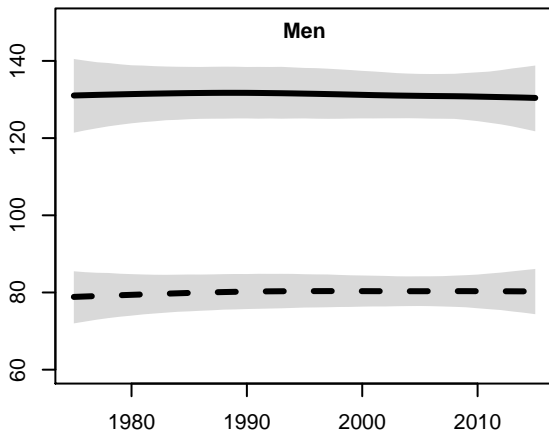

**Congo**  
Central Africa

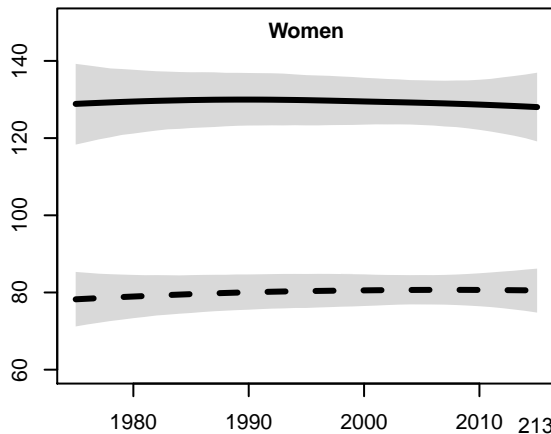

### Cook Islands

Polynesia and Micronesia

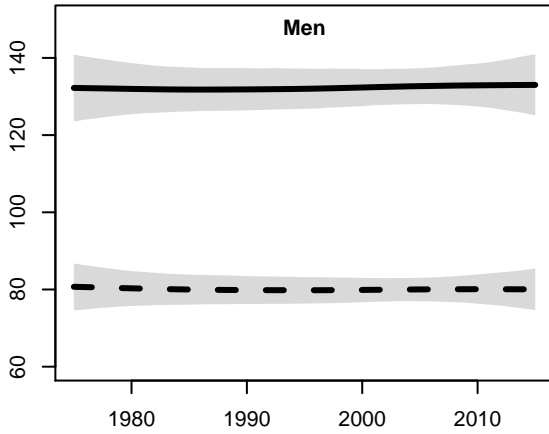

### Cook Islands

Polynesia and Micronesia

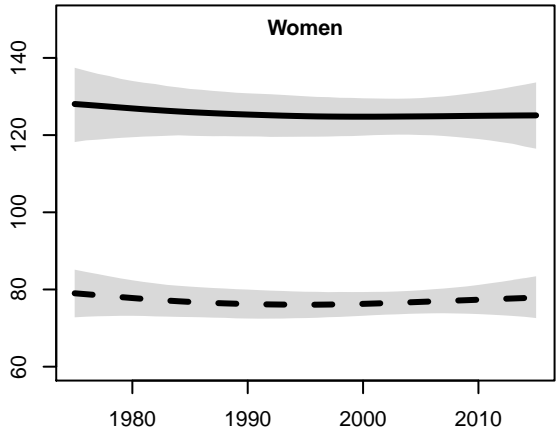

### Costa Rica

Central Latin America

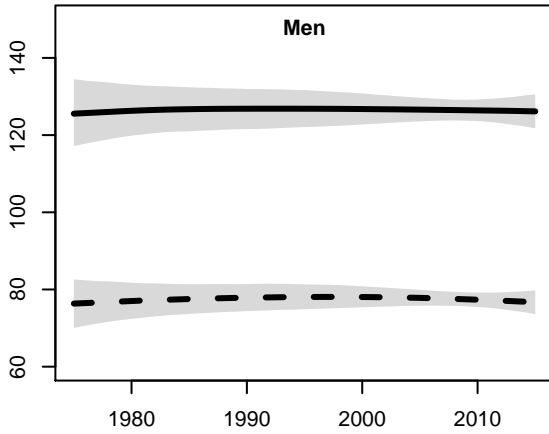

### Costa Rica

Central Latin America

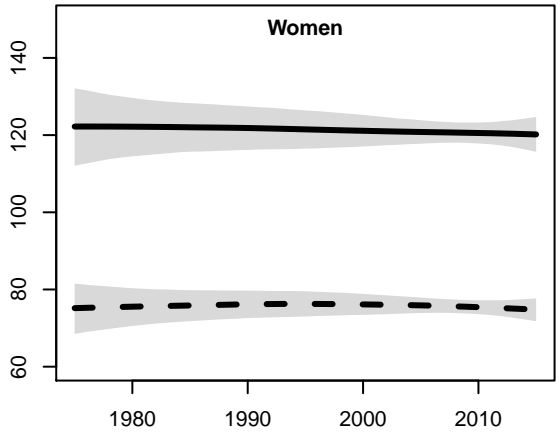

### Cote d'Ivoire

West Africa

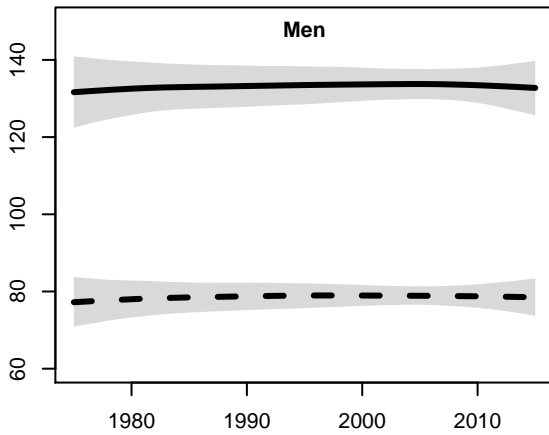

### Cote d'Ivoire

West Africa

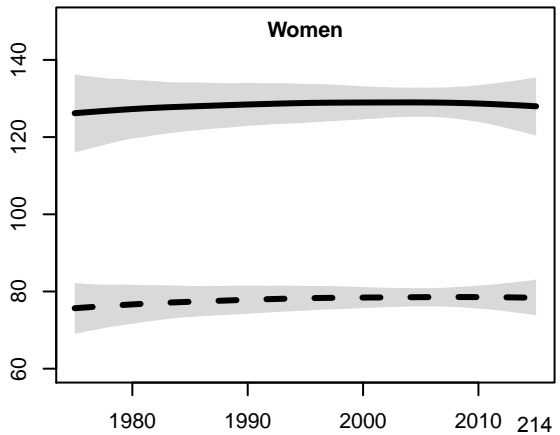



### Croatia

Central Europe

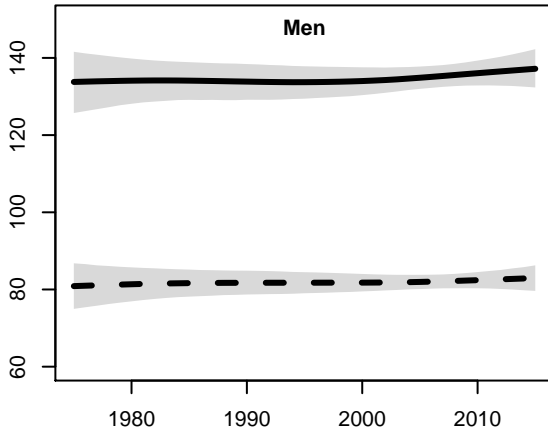

### Croatia

Central Europe

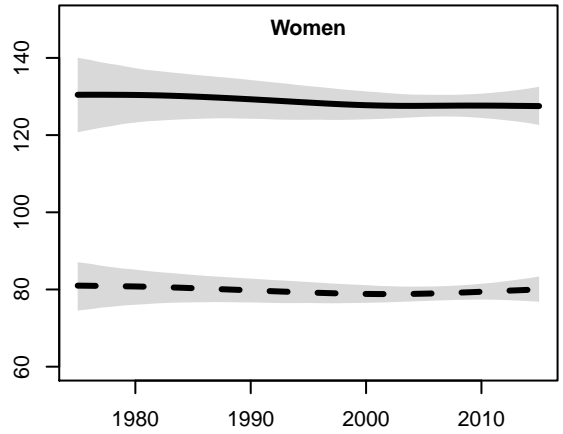

### Cuba

Caribbean

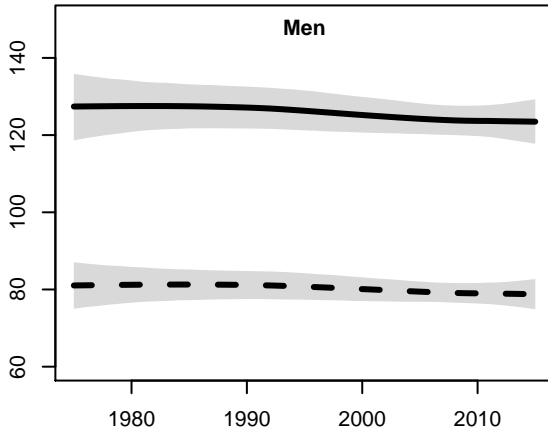

### Cuba

Caribbean

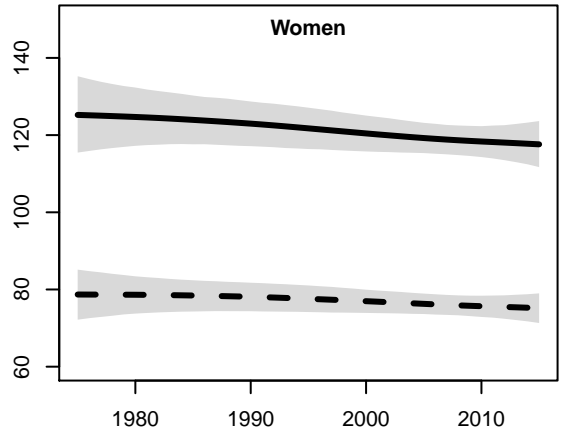

### Cyprus

South Western Europe

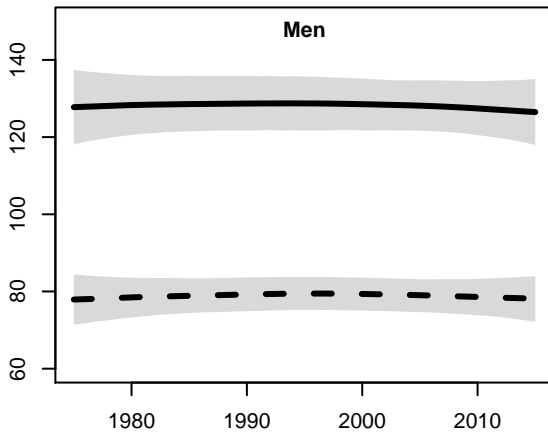

### Cyprus

South Western Europe

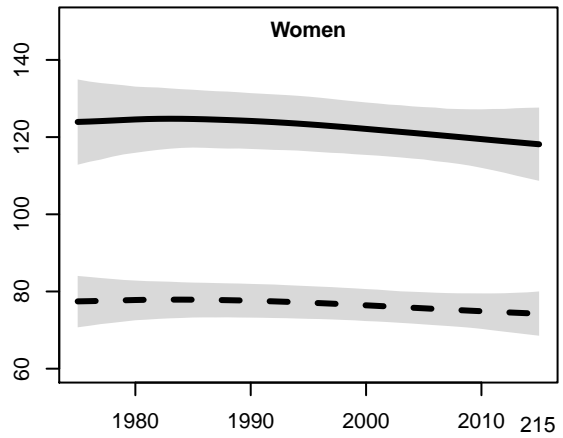

**Czech Republic**  
Central Europe

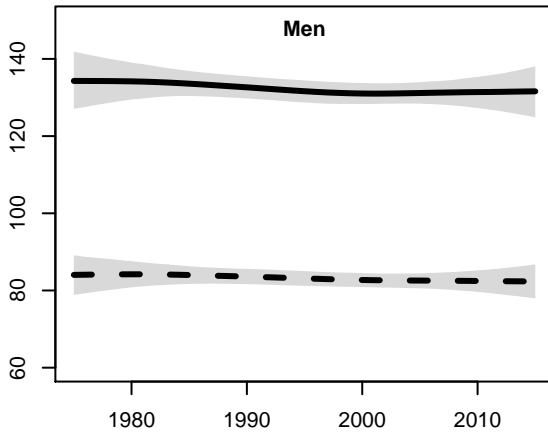

**Czech Republic**  
Central Europe

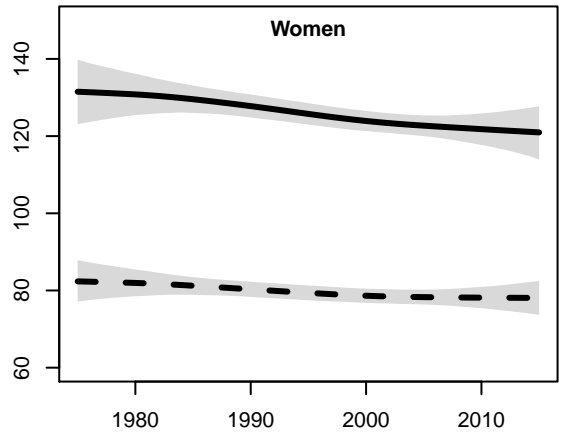

**Denmark**  
North Western Europe

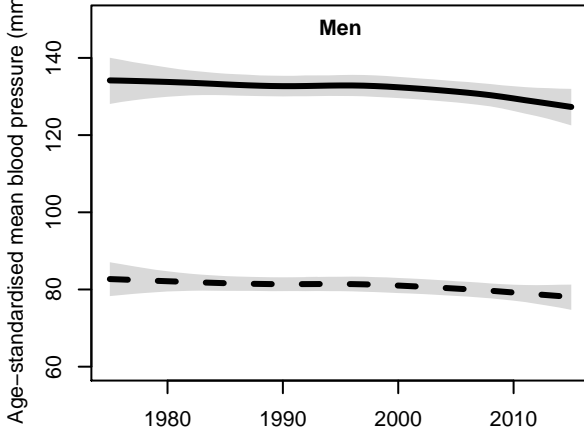

**Denmark**  
North Western Europe

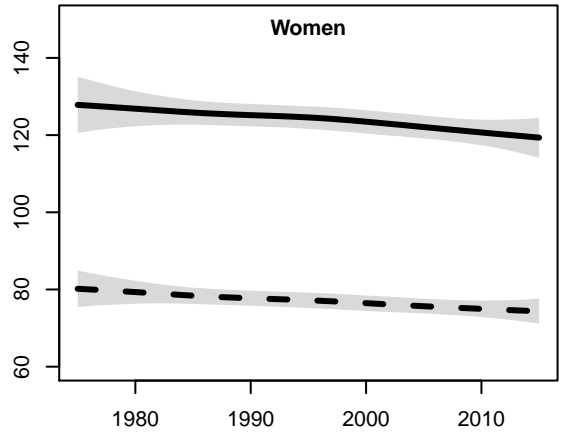

**Djibouti**  
East Africa

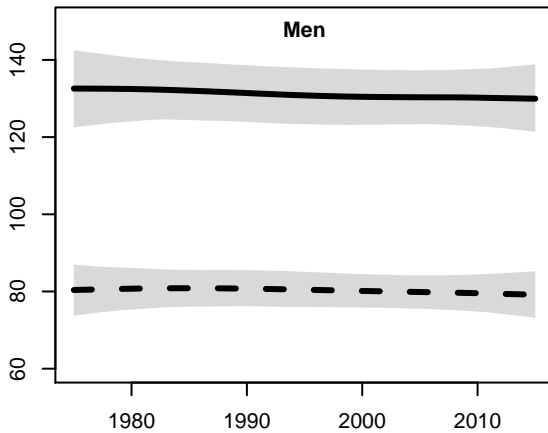

**Djibouti**  
East Africa

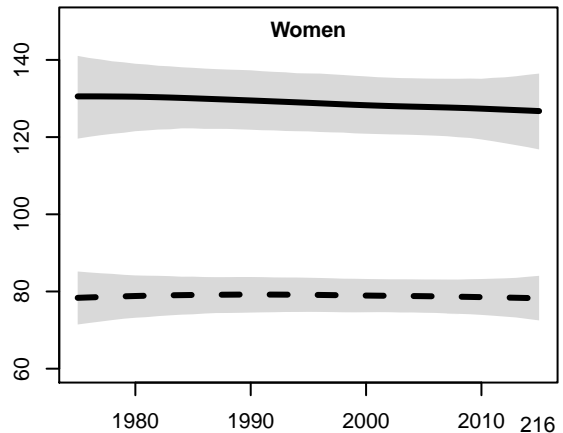

**Dominica**

Caribbean

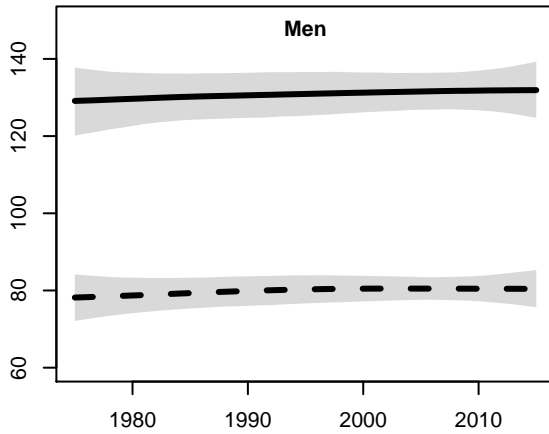**Dominica**

Caribbean

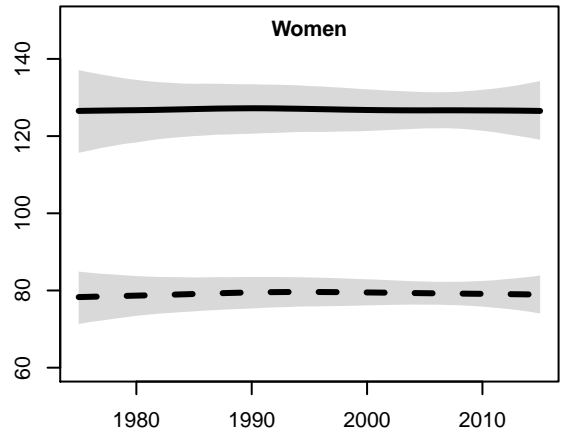**Dominican Republic**

Caribbean

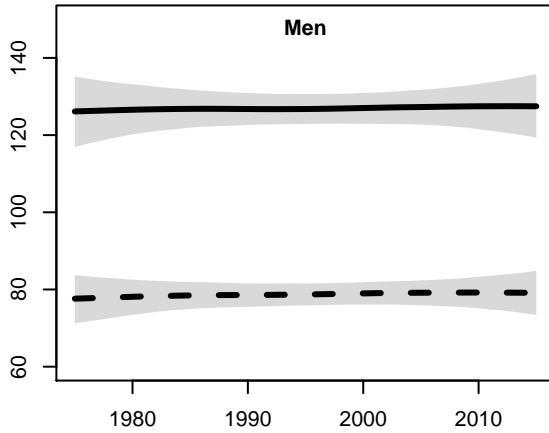**Dominican Republic**

Caribbean

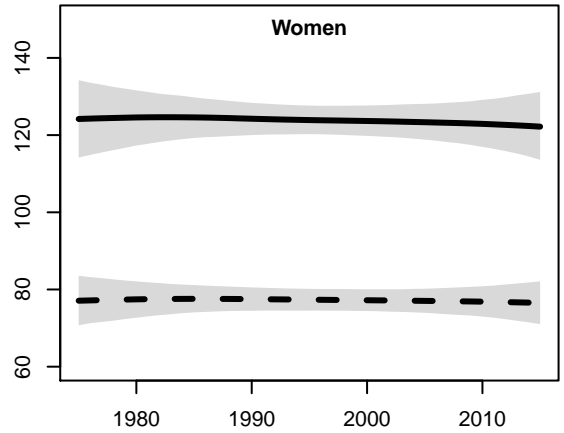**DR Congo**

Central Africa

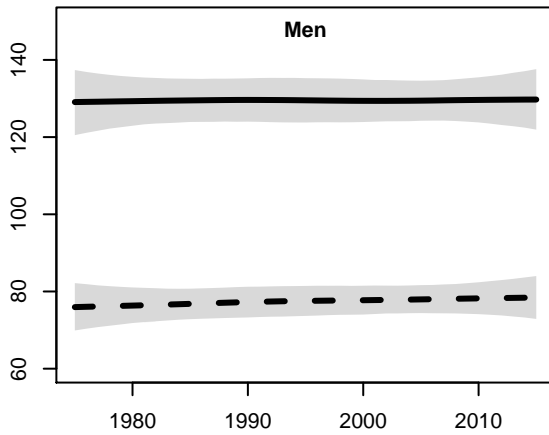**DR Congo**

Central Africa

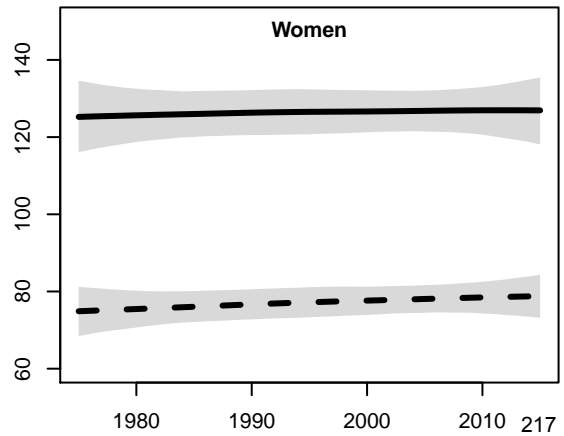

**Ecuador**  
Andean Latin America

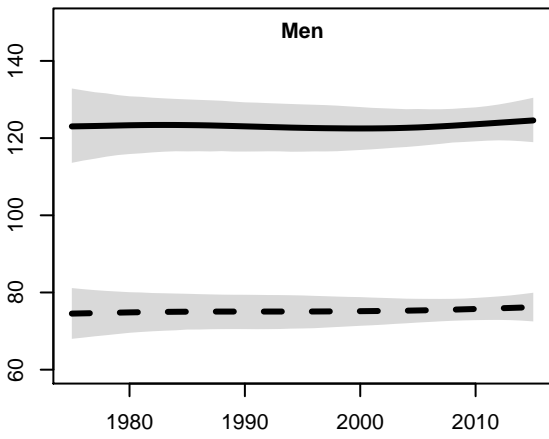

**Ecuador**  
Andean Latin America

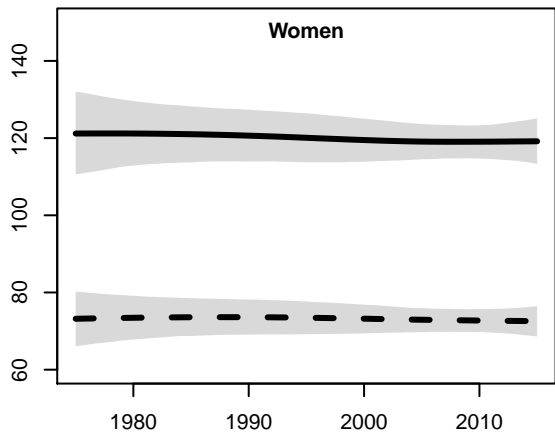

**Egypt**  
Middle East and North Africa

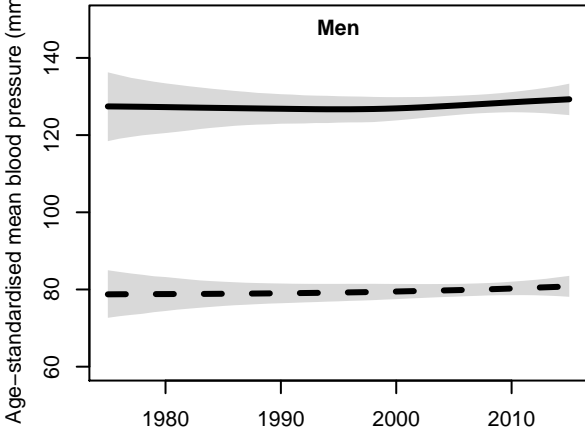

**Egypt**  
Middle East and North Africa

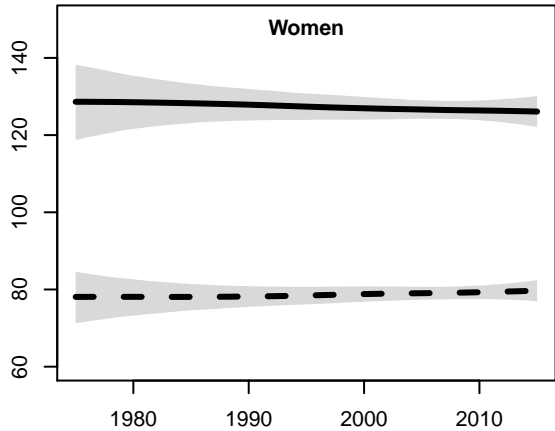

**El Salvador**  
Central Latin America

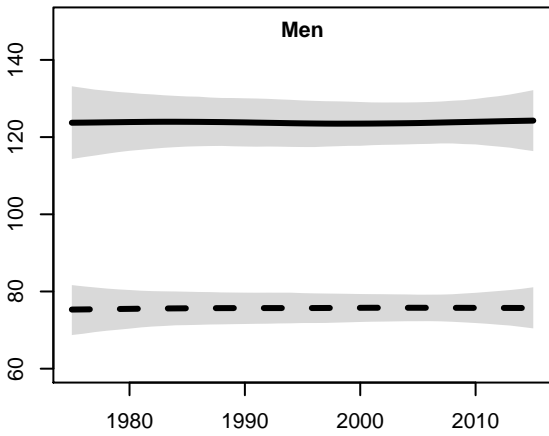

**El Salvador**  
Central Latin America

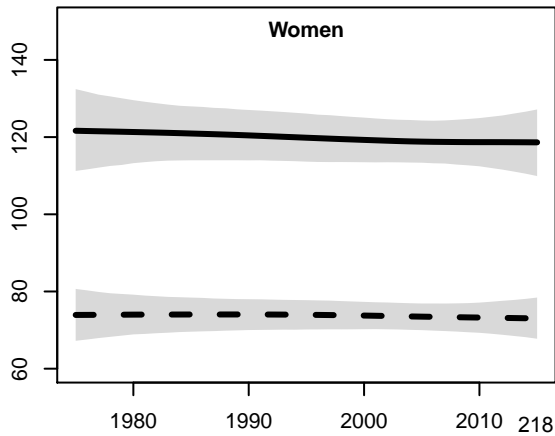

### Equatorial Guinea

Central Africa

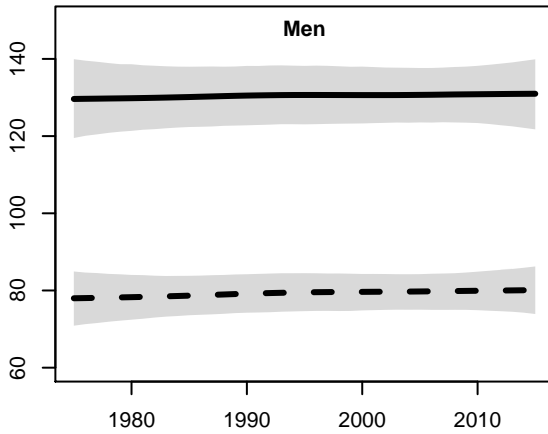

### Equatorial Guinea

Central Africa

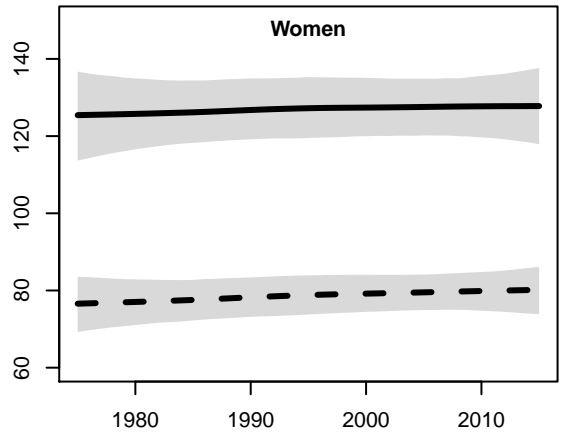

### Eritrea

East Africa

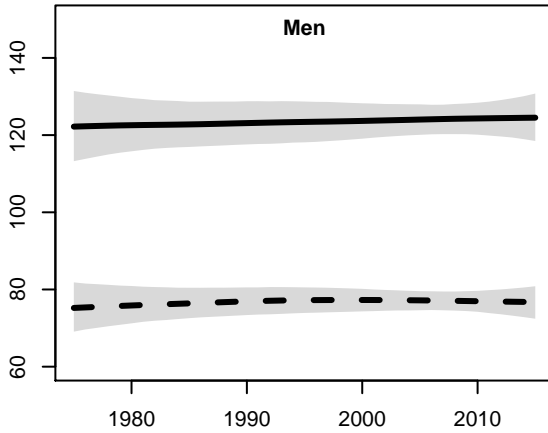

### Eritrea

East Africa

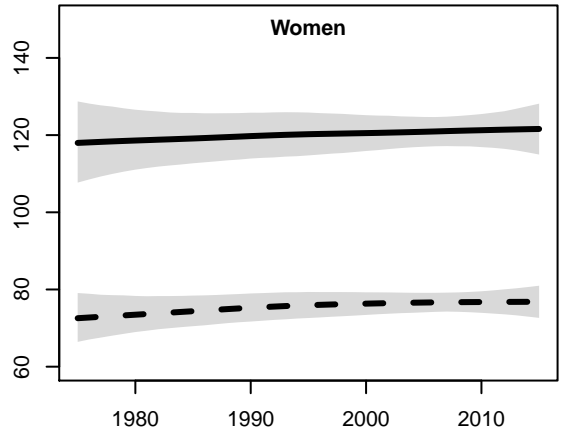

### Estonia

Eastern Europe

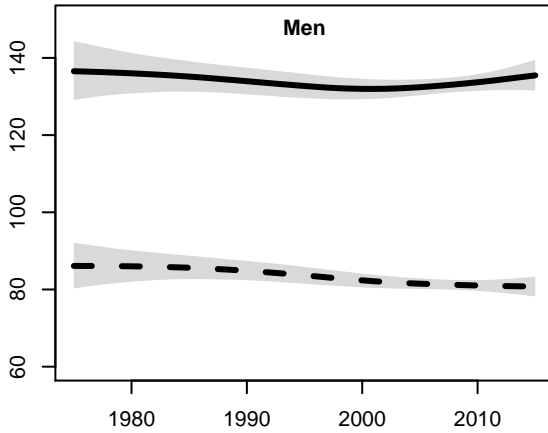

### Estonia

Eastern Europe

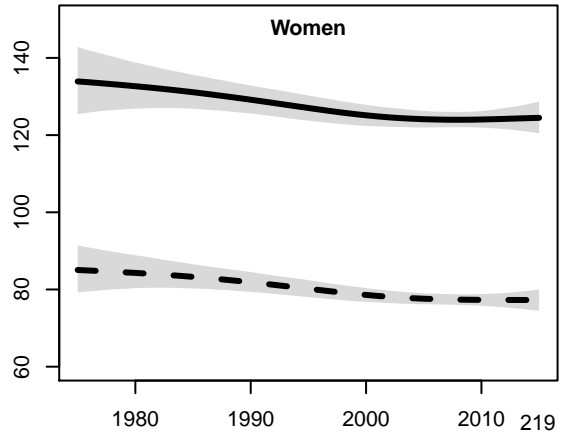

Age-standardised mean blood pressure (mmHg)

219

**Ethiopia**  
East Africa

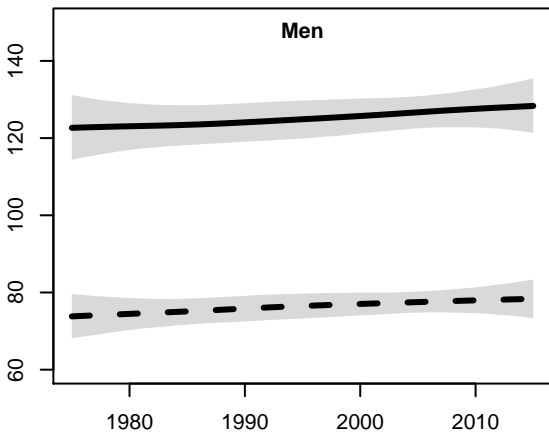

**Ethiopia**  
East Africa

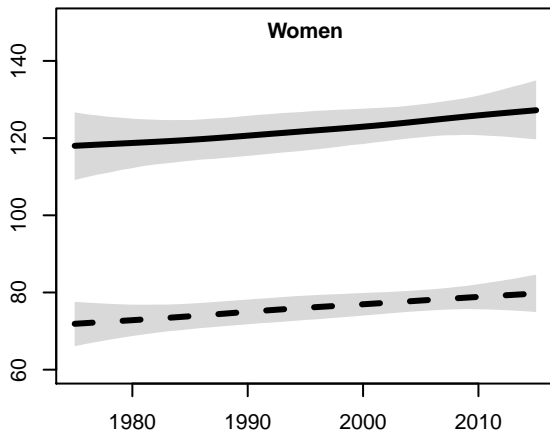

**Fiji**  
Melanesia

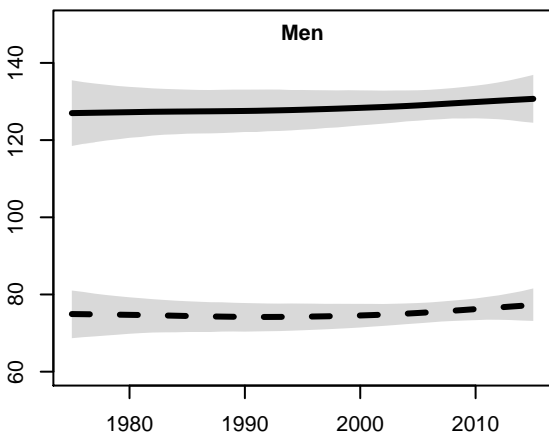

**Fiji**  
Melanesia

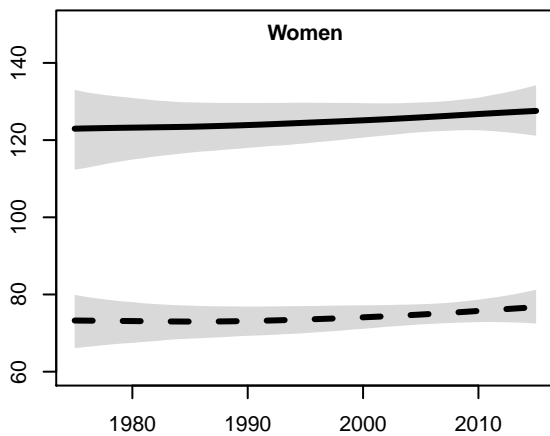

**Finland**  
North Western Europe

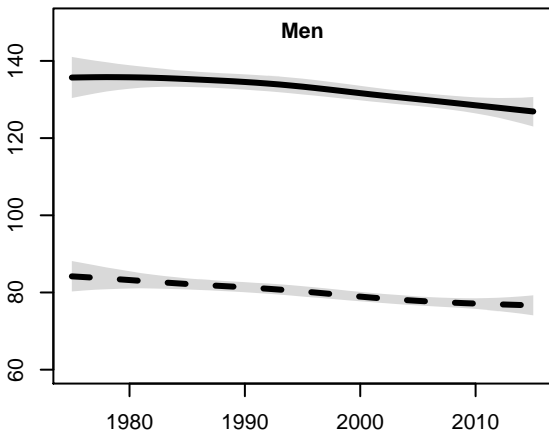

**Finland**  
North Western Europe

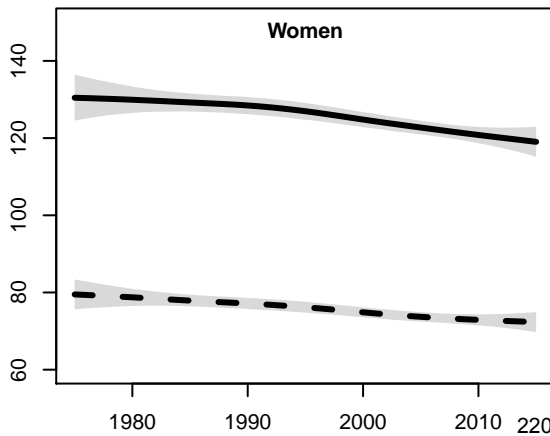

**France**  
South Western Europe

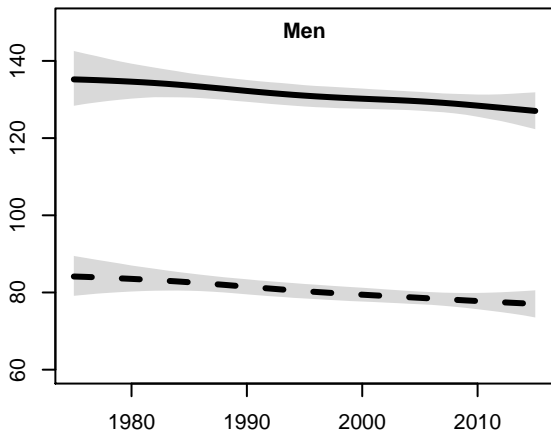

**France**  
South Western Europe

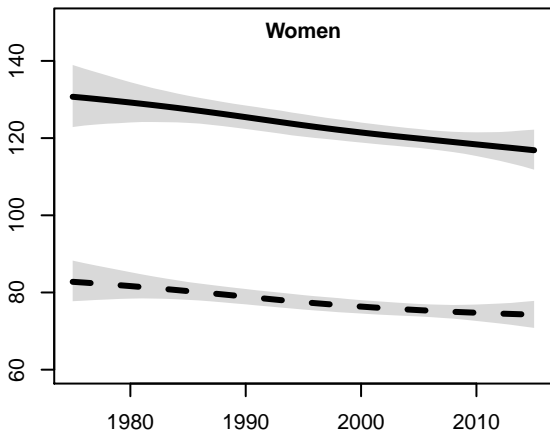

**French Polynesia**  
Polynesia and Micronesia

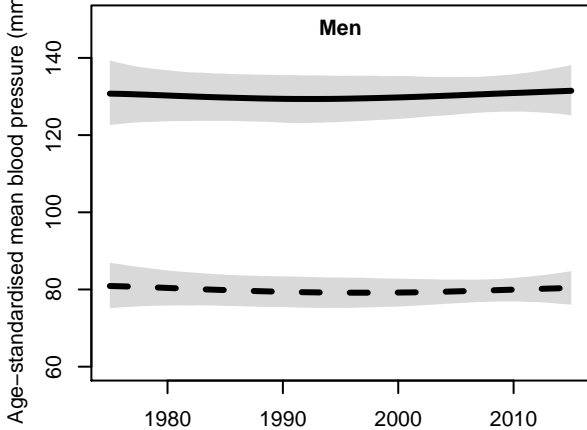

**French Polynesia**  
Polynesia and Micronesia

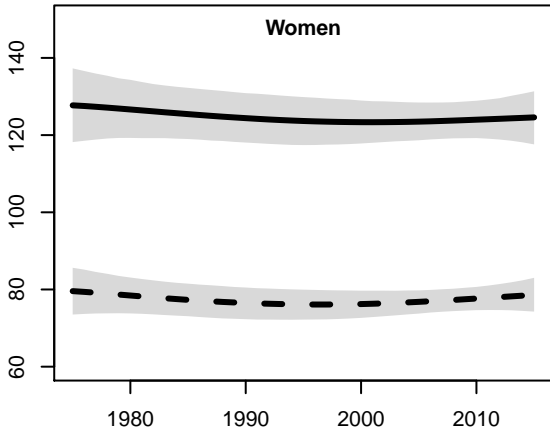

**Gabon**  
Central Africa

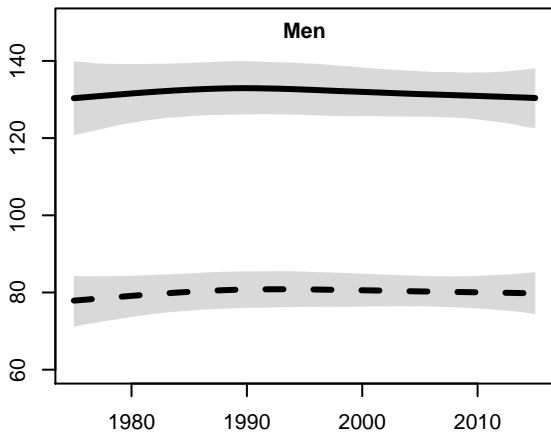

**Gabon**  
Central Africa

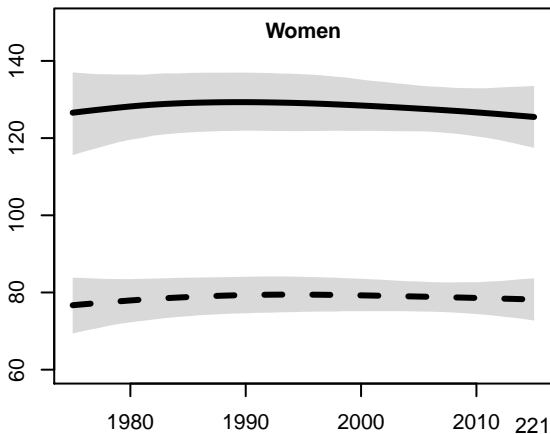

**Gambia**  
West Africa

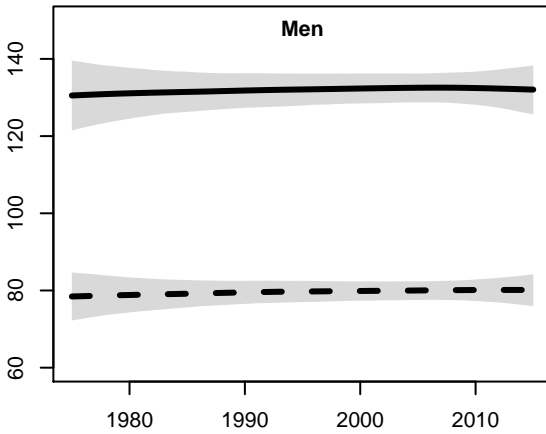

**Gambia**  
West Africa

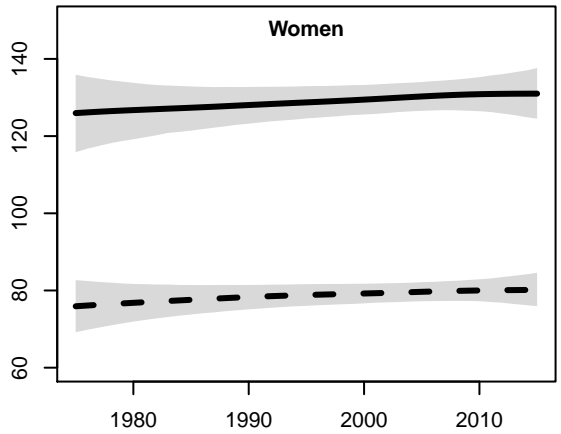

**Georgia**  
Central Asia

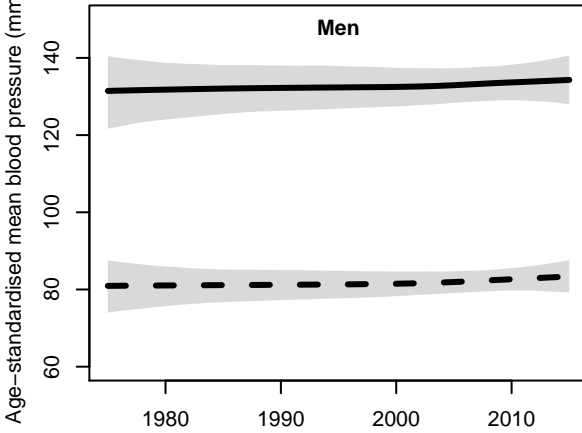

**Georgia**  
Central Asia

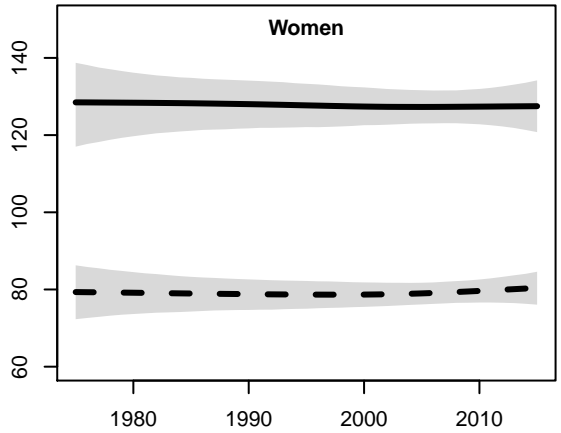

**Germany**  
North Western Europe

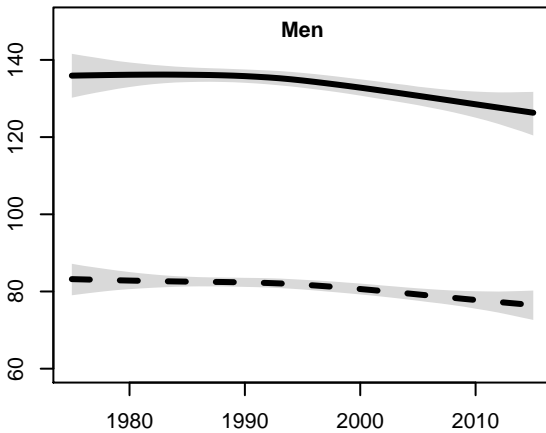

**Germany**  
North Western Europe

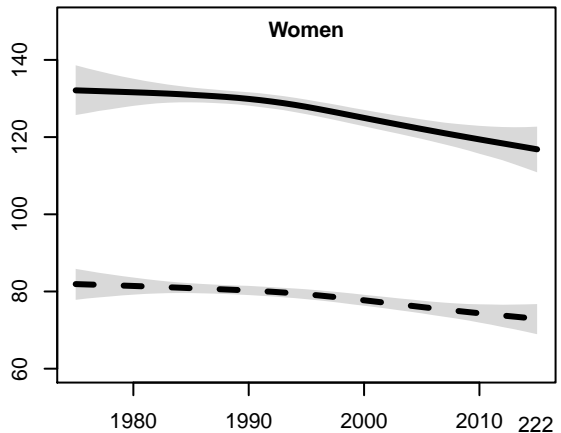



**Ghana**  
West Africa

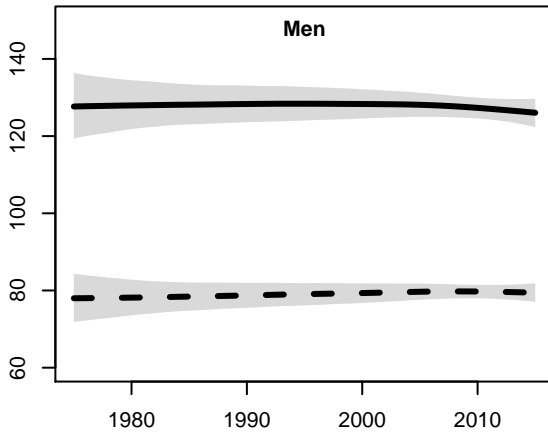

**Ghana**  
West Africa

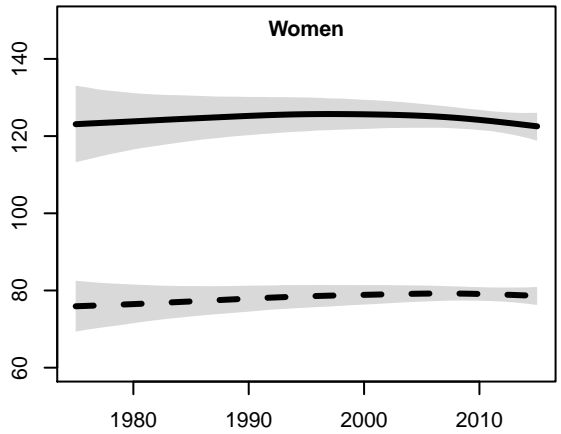

**Greece**  
South Western Europe

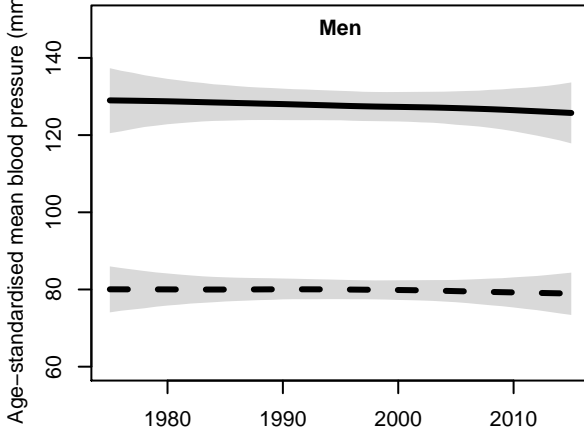

**Greece**  
South Western Europe

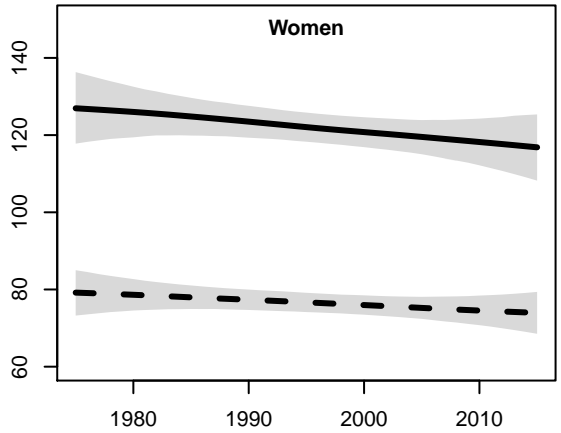

**Greenland**  
North Western Europe

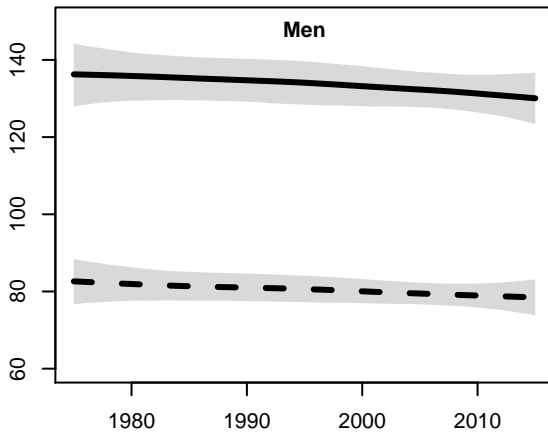

**Greenland**  
North Western Europe

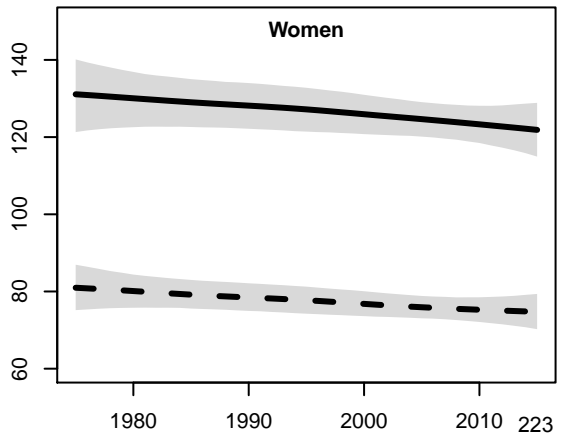

**Grenada**  
Caribbean

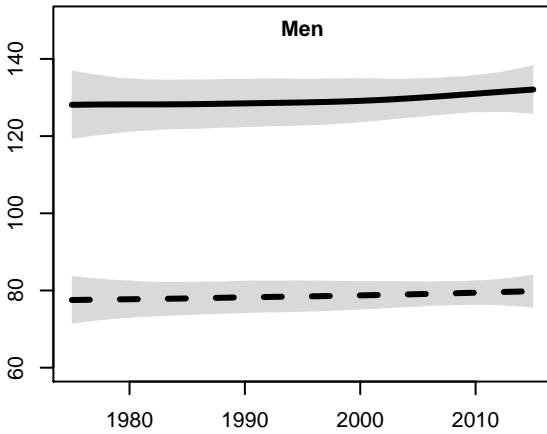

**Grenada**  
Caribbean

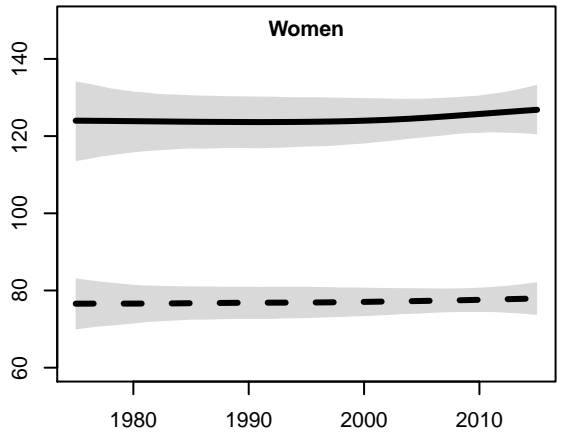

**Guatemala**  
Central Latin America

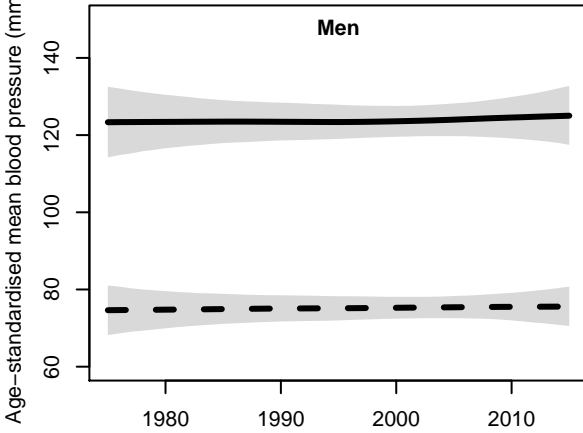

**Guatemala**  
Central Latin America

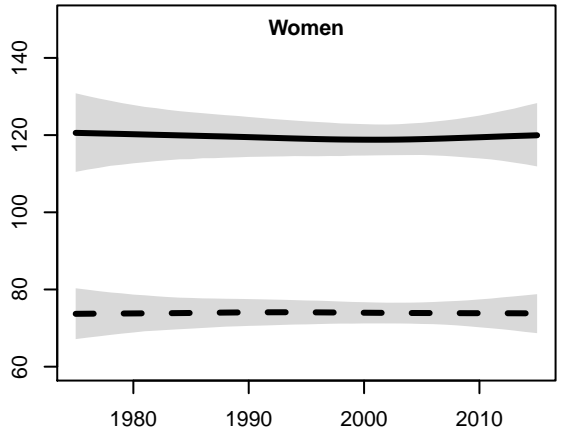

**Guinea**  
West Africa

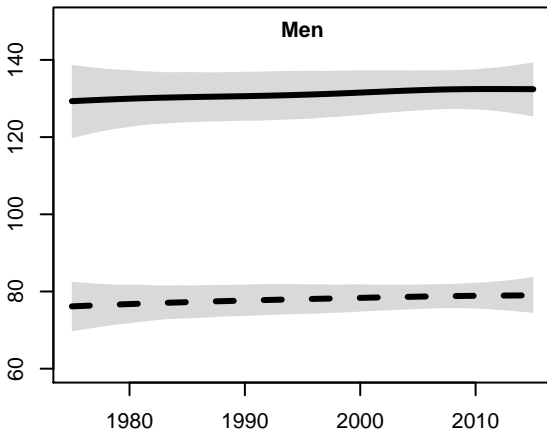

**Guinea**  
West Africa

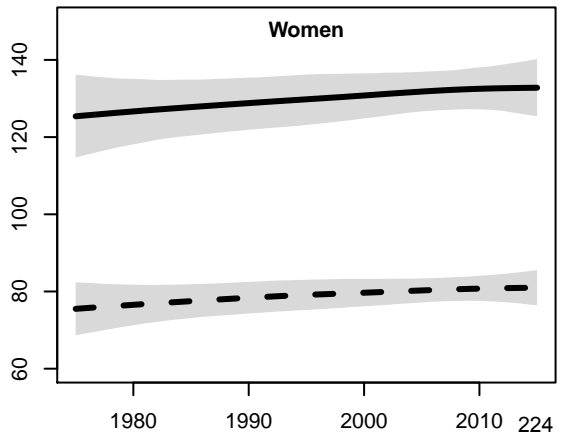

**Guinea Bissau**

West Africa

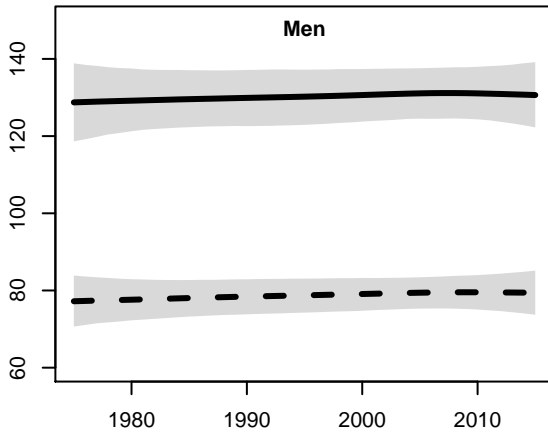**Guinea Bissau**

West Africa

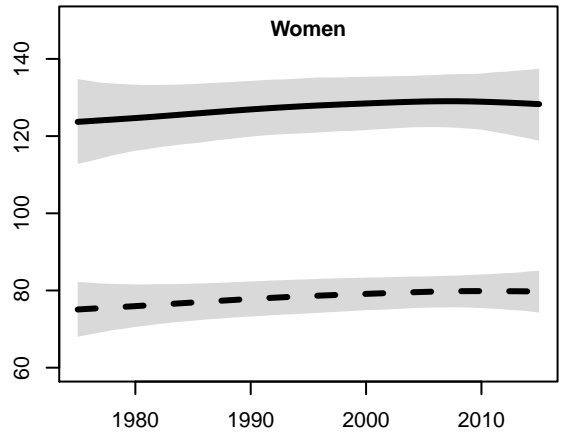**Guyana**

Caribbean

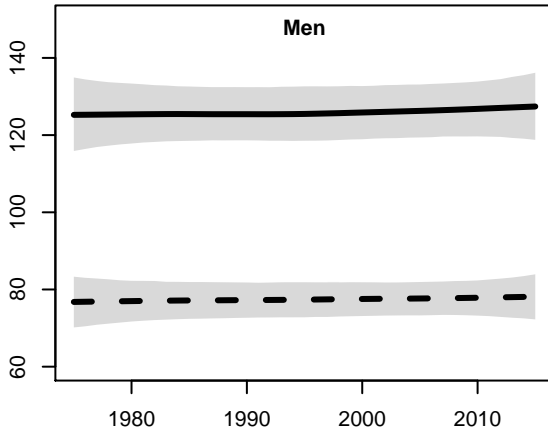**Guyana**

Caribbean

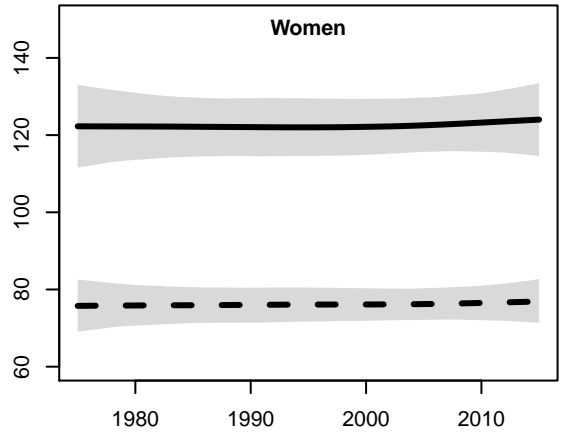**Haiti**

Caribbean

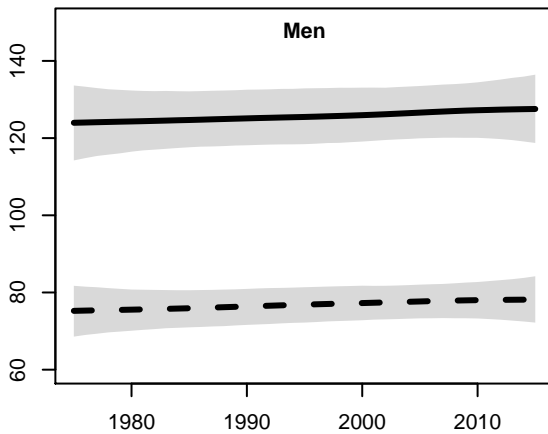**Haiti**

Caribbean

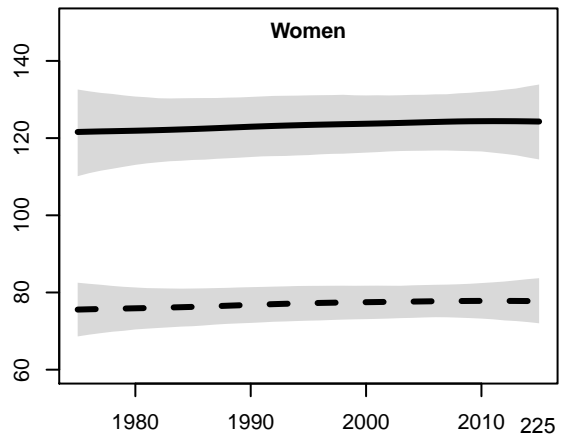

**Honduras**  
Central Latin America

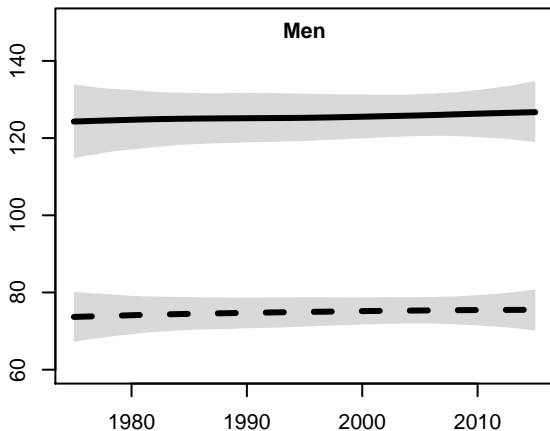

**Honduras**  
Central Latin America

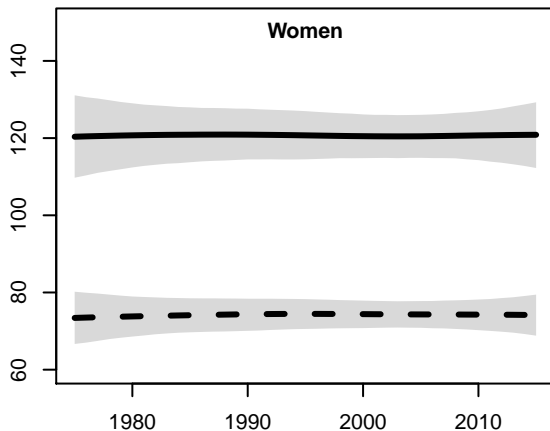

**Hungary**  
Central Europe

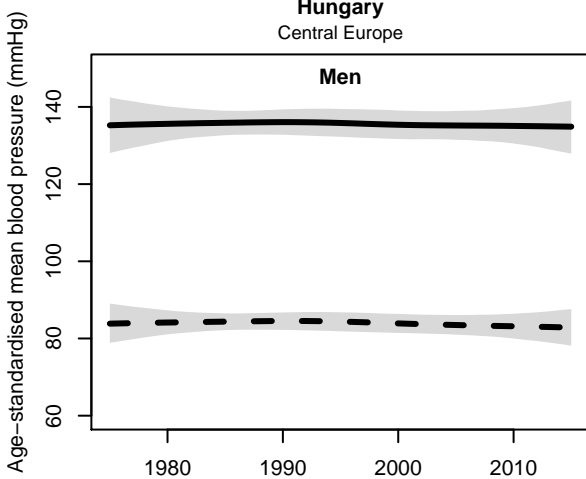

**Hungary**  
Central Europe

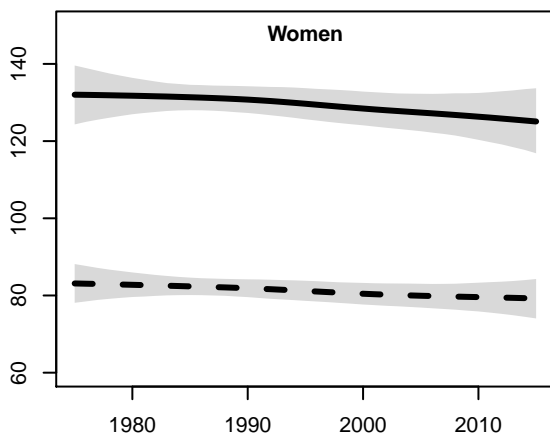

**Iceland**  
North Western Europe

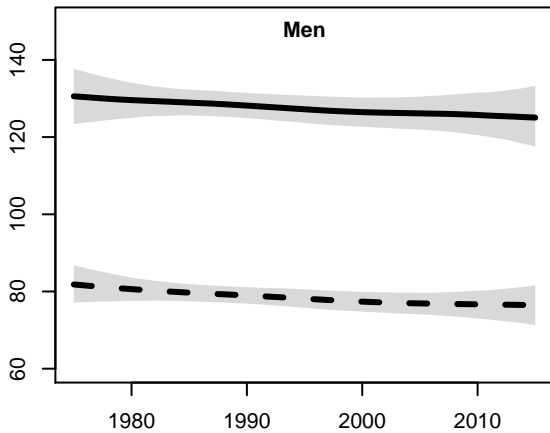

**Iceland**  
North Western Europe

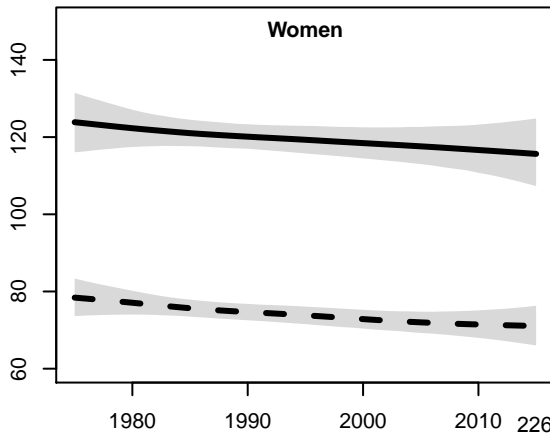

**India**  
South Asia

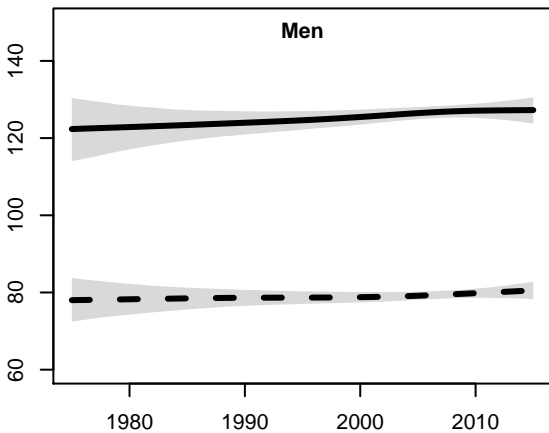

**India**  
South Asia

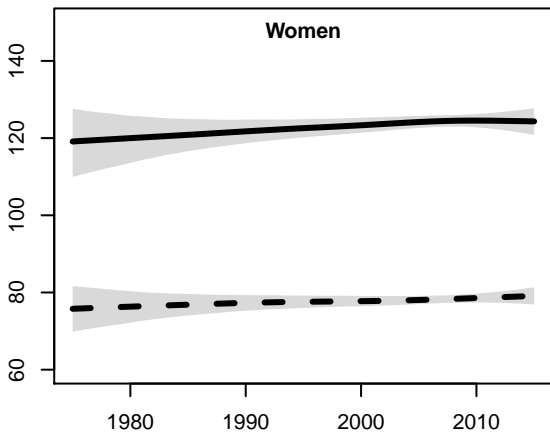

**Indonesia**  
Southeast Asia

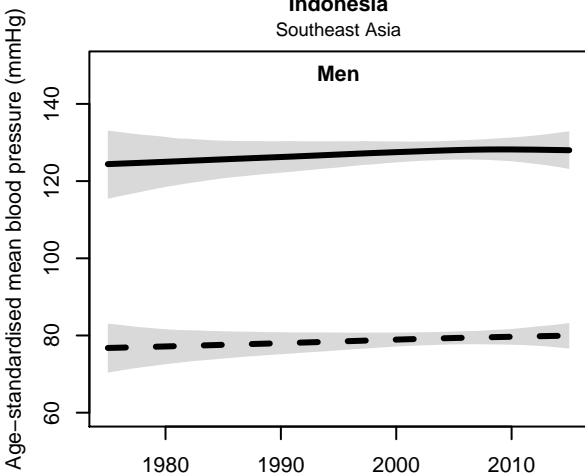

**Indonesia**  
Southeast Asia

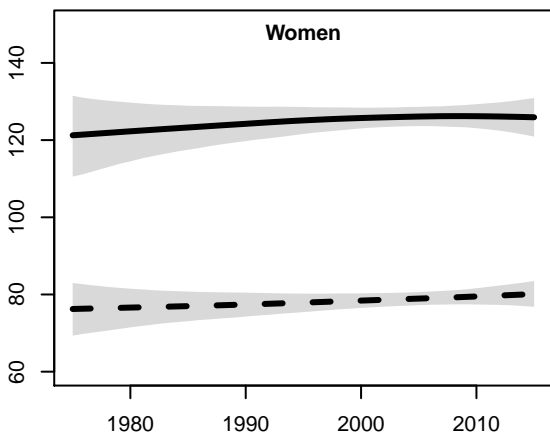

**Iran**  
Middle East and North Africa

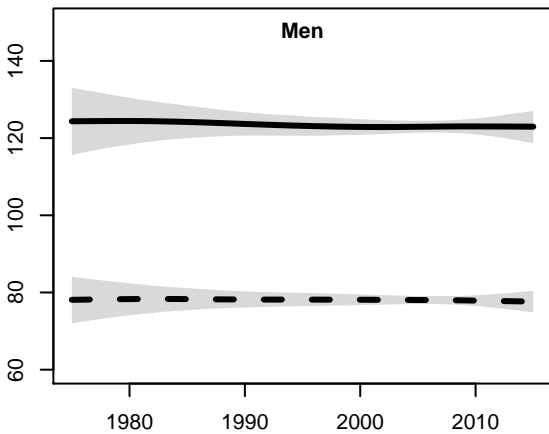

**Iran**  
Middle East and North Africa

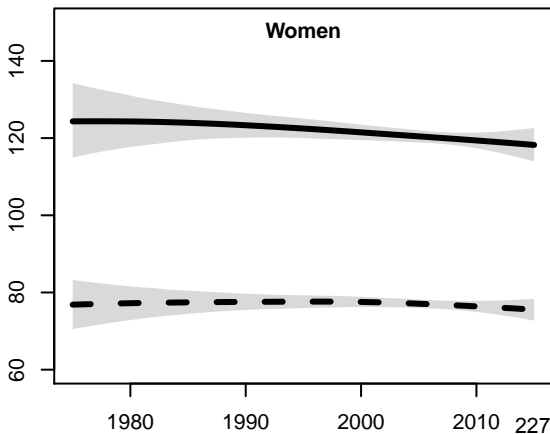

**Iraq**  
Middle East and North Africa

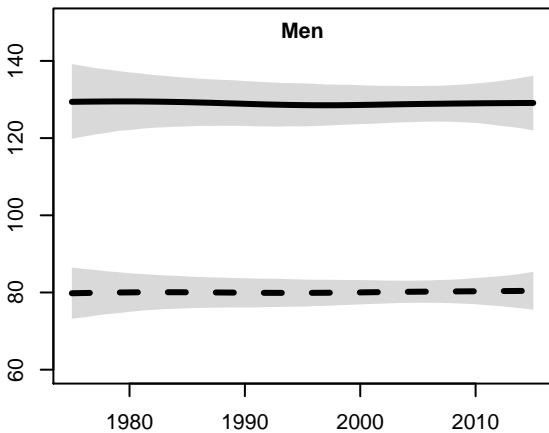

**Iraq**  
Middle East and North Africa

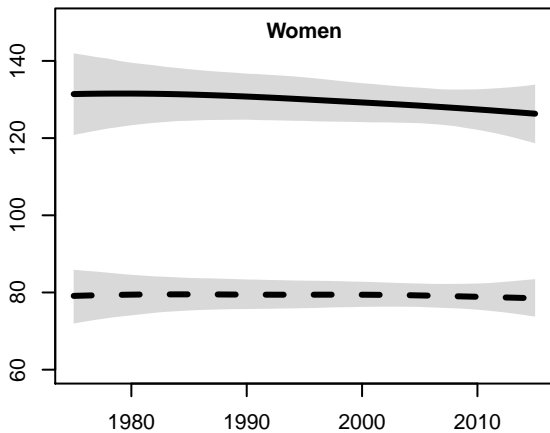

**Ireland**  
High-income English-speaking countries

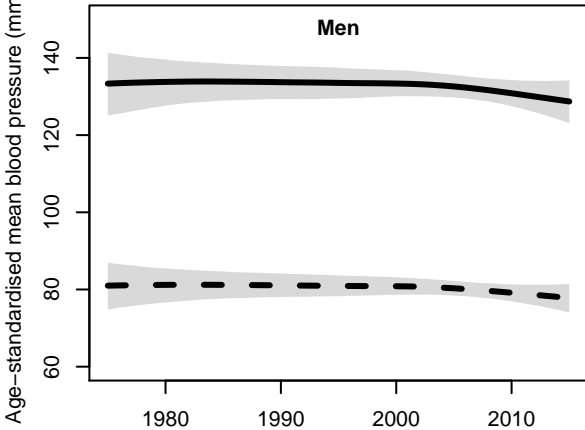

**Ireland**  
High-income English-speaking countries

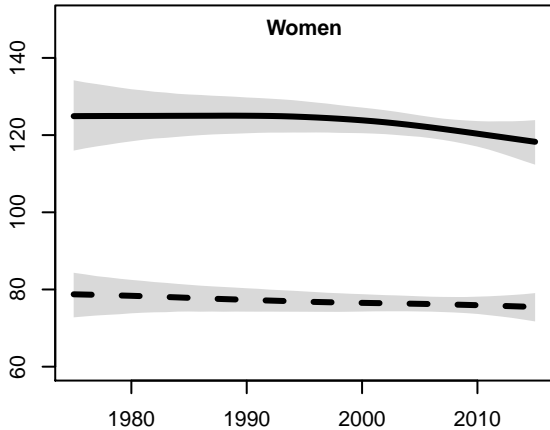

**Israel**  
South Western Europe

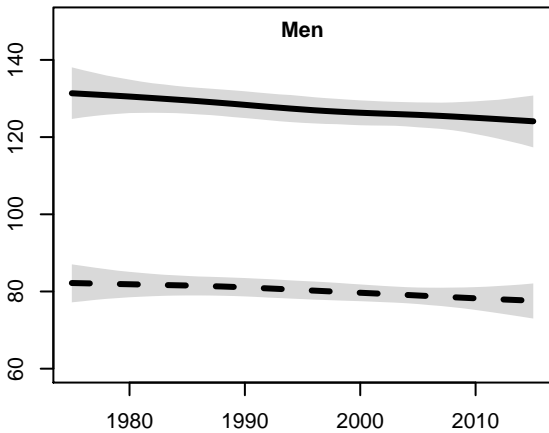

**Israel**  
South Western Europe

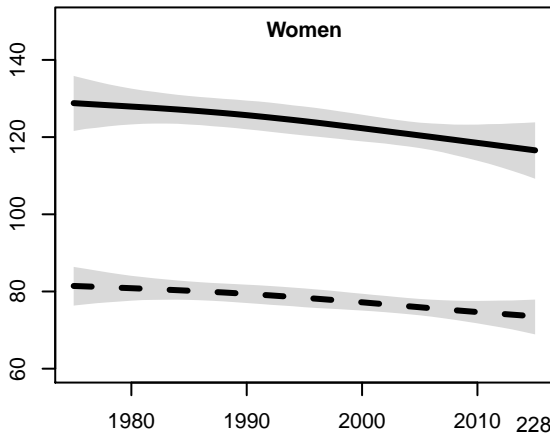

**Italy**  
South Western Europe

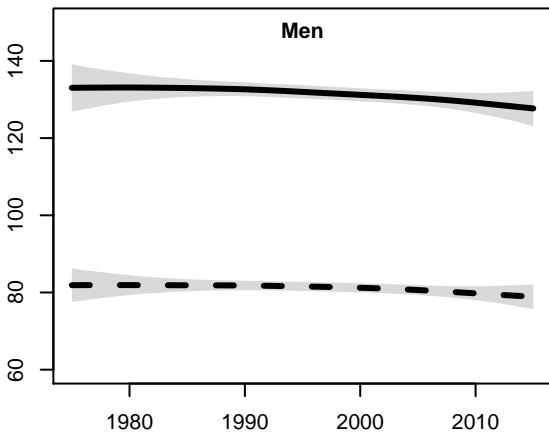

**Italy**  
South Western Europe

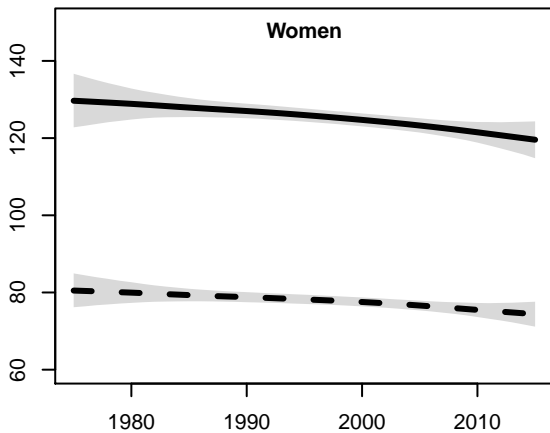

**Jamaica**  
Caribbean

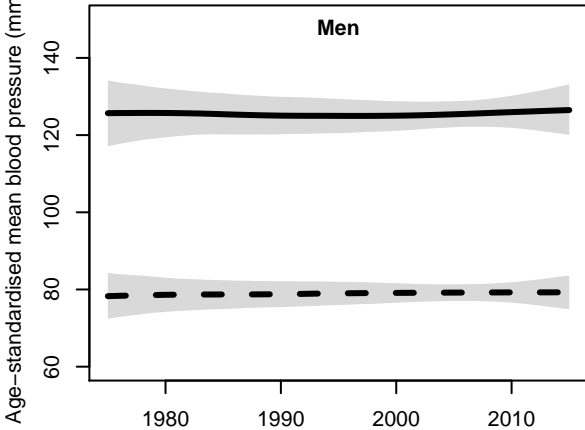

**Jamaica**  
Caribbean

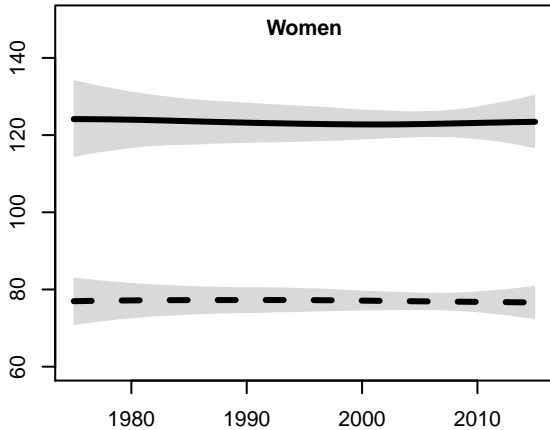

**Japan**  
High-income Asia Pacific

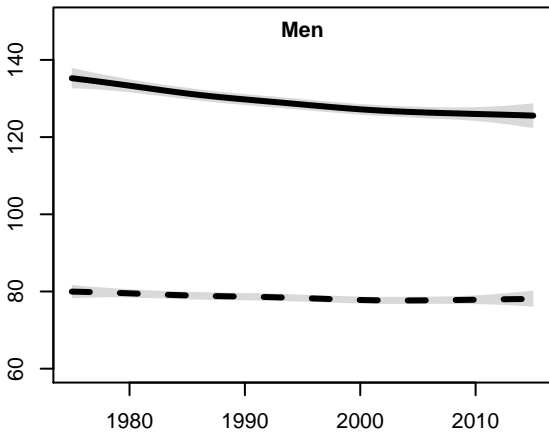

**Japan**  
High-income Asia Pacific

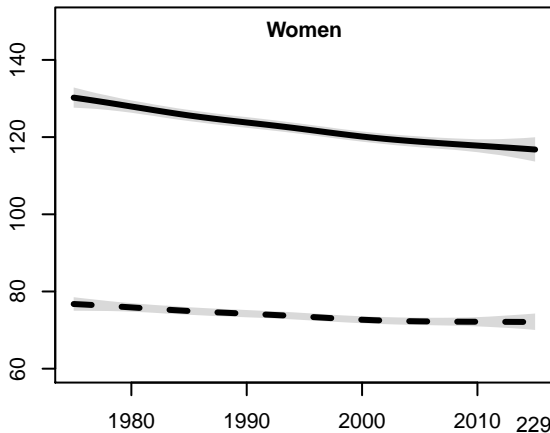

**Jordan**  
Middle East and North Africa

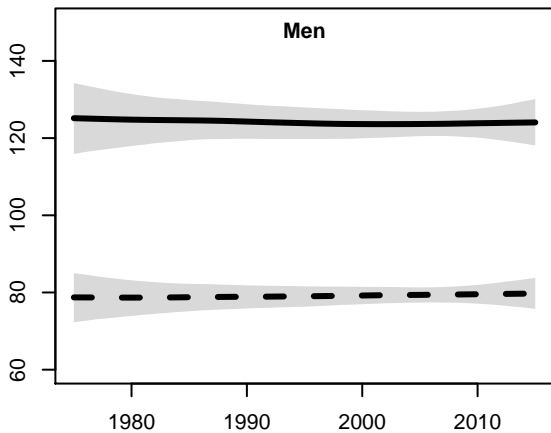

**Jordan**  
Middle East and North Africa

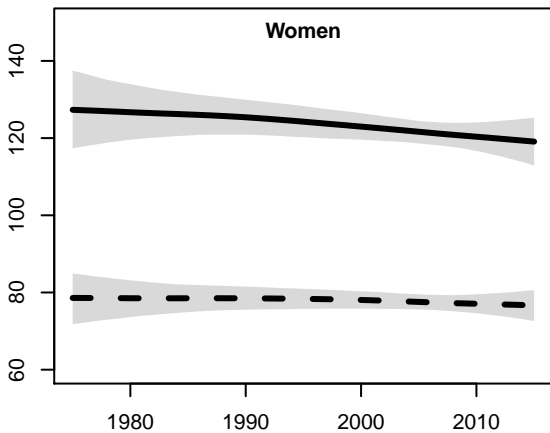

**Kazakhstan**  
Central Asia

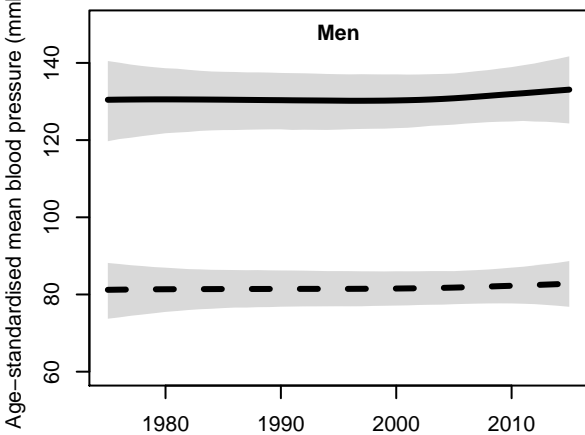

**Kazakhstan**  
Central Asia

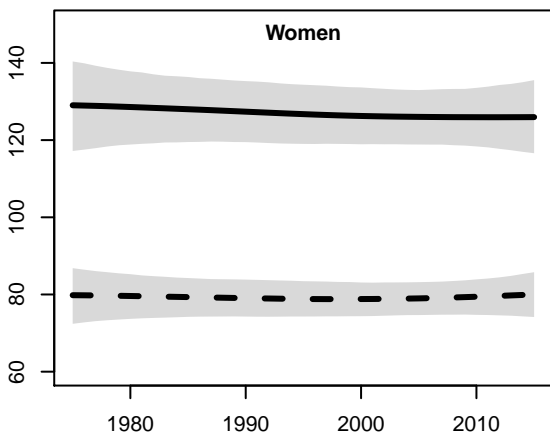

**Kenya**  
East Africa

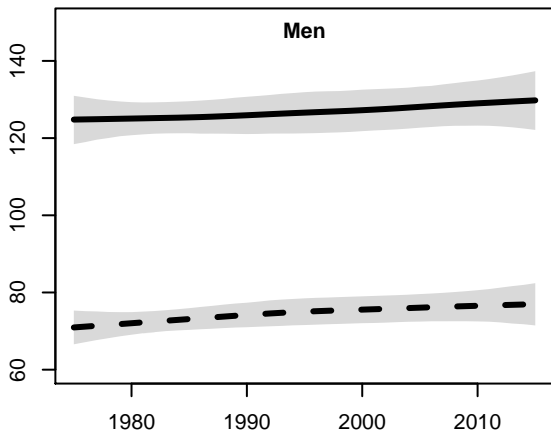

**Kenya**  
East Africa

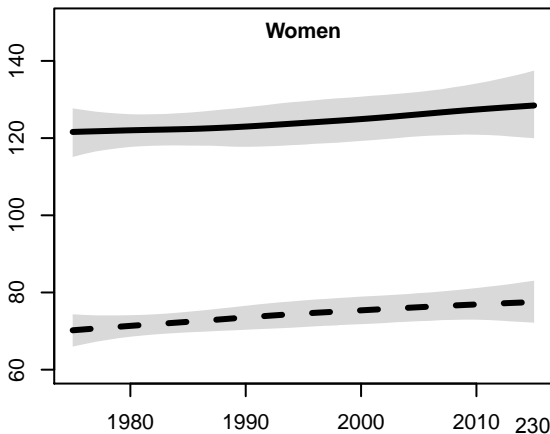



### Kiribati

Polynesia and Micronesia

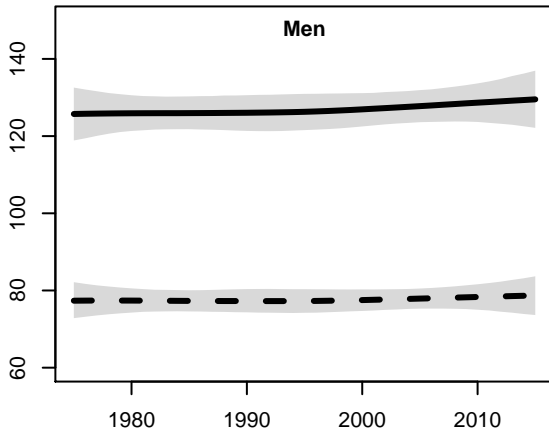

### Kiribati

Polynesia and Micronesia

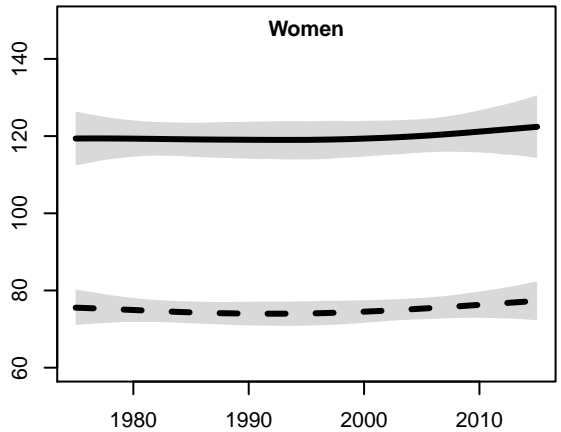

### Kuwait

Middle East and North Africa

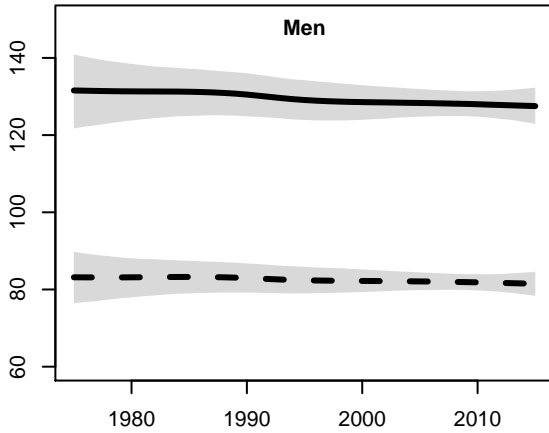

### Kuwait

Middle East and North Africa

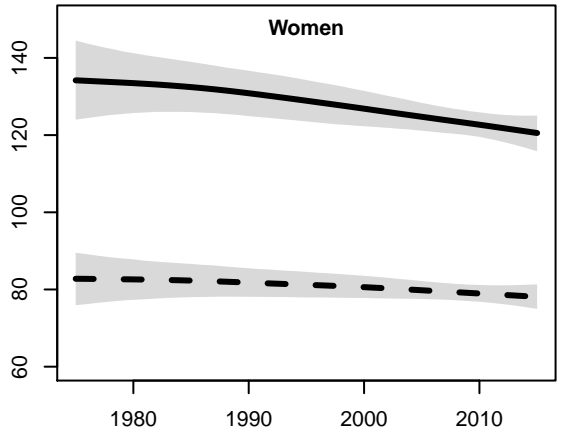

### Kyrgyzstan

Central Asia

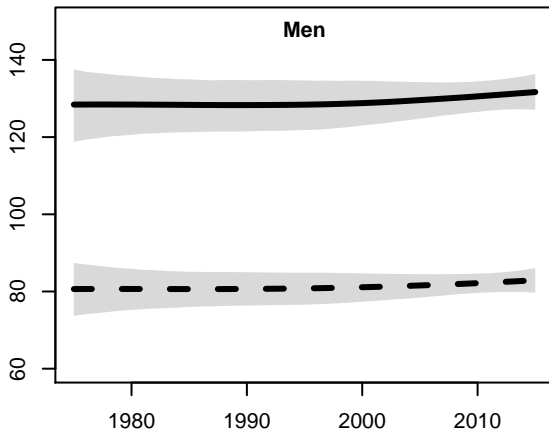

### Kyrgyzstan

Central Asia

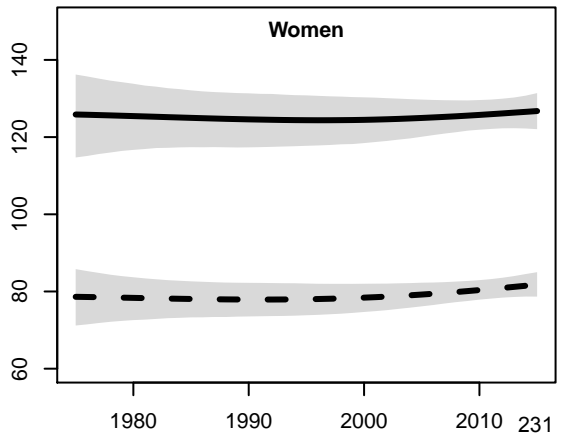

Age-standardised mean blood pressure (mmHg)

**Lao PDR**  
Southeast Asia

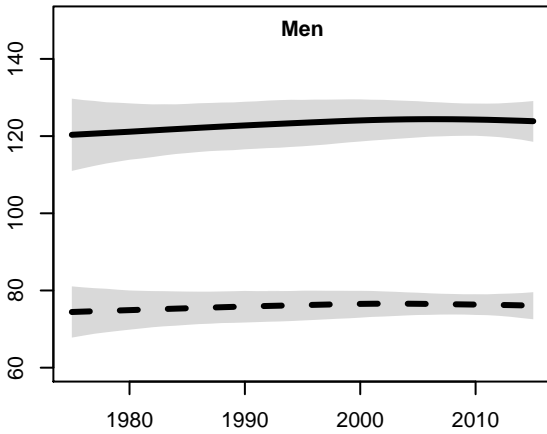

**Lao PDR**  
Southeast Asia

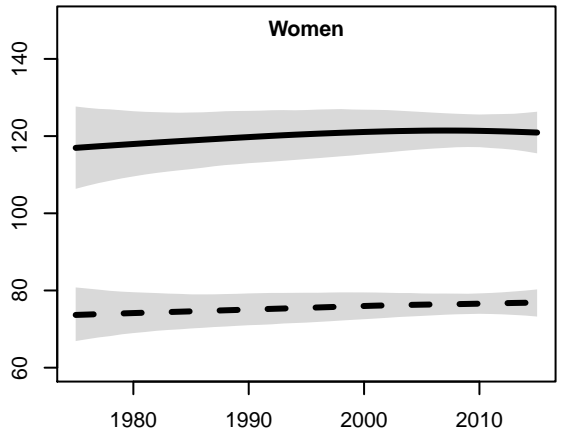

**Latvia**  
Eastern Europe

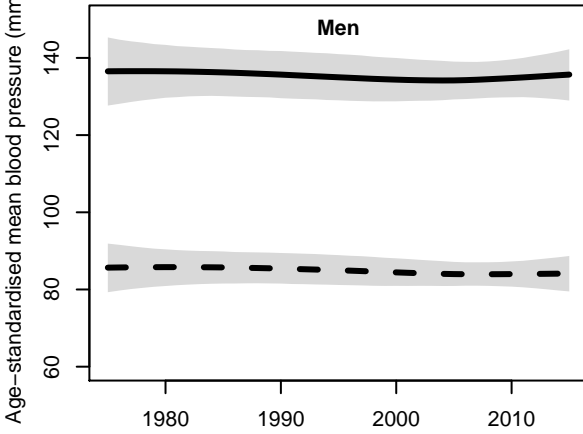

**Latvia**  
Eastern Europe

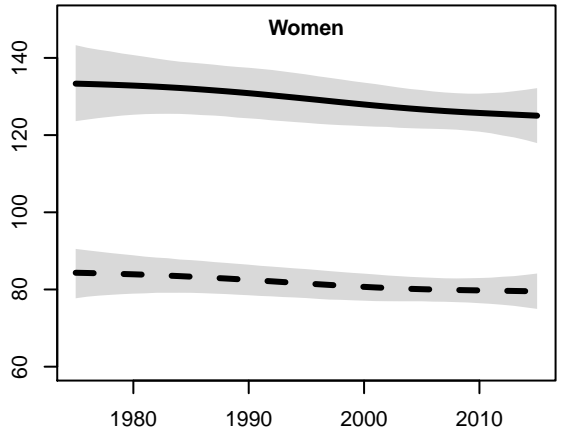

**Lebanon**  
Middle East and North Africa

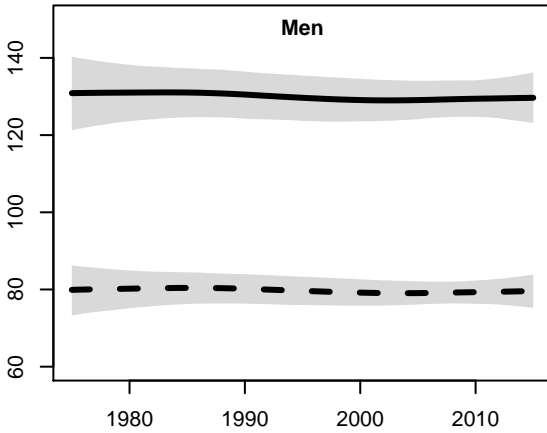

**Lebanon**  
Middle East and North Africa

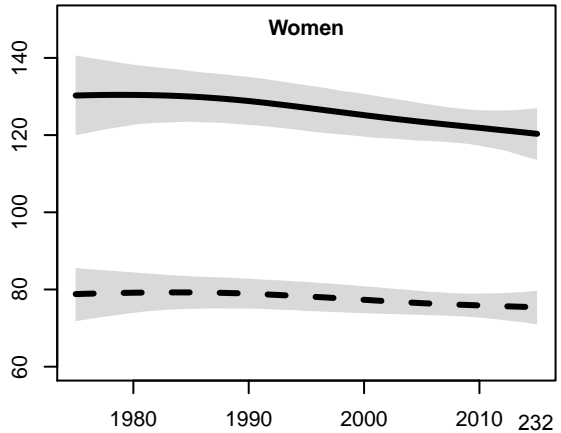

**Lesotho**  
Southern Africa

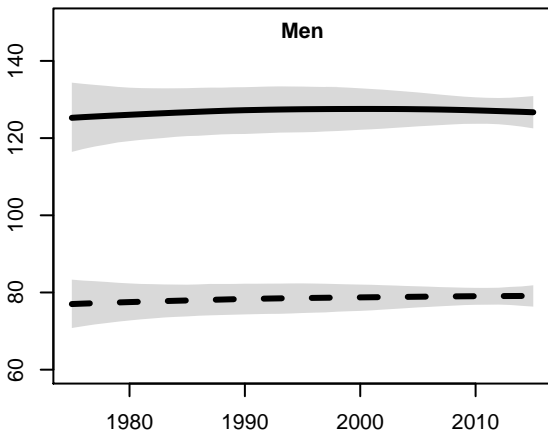

**Lesotho**  
Southern Africa

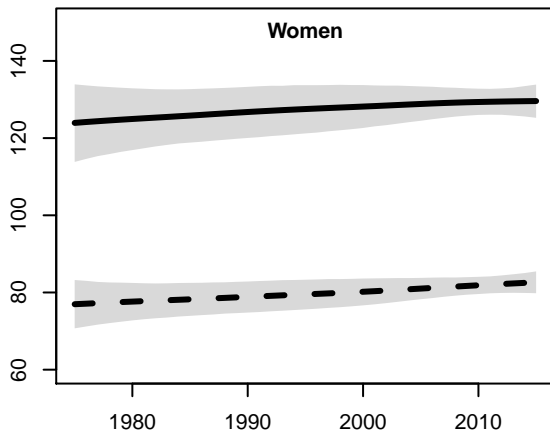

**Liberia**  
West Africa

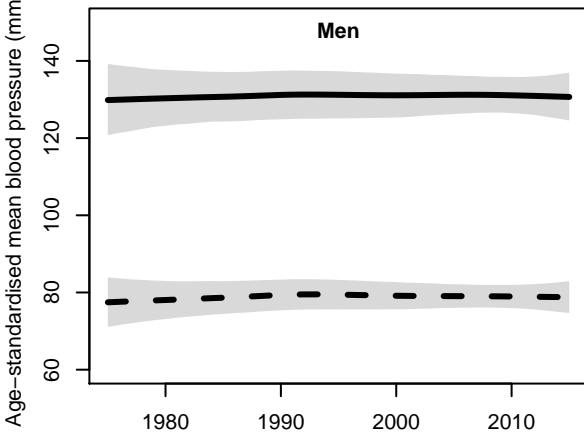

**Liberia**  
West Africa

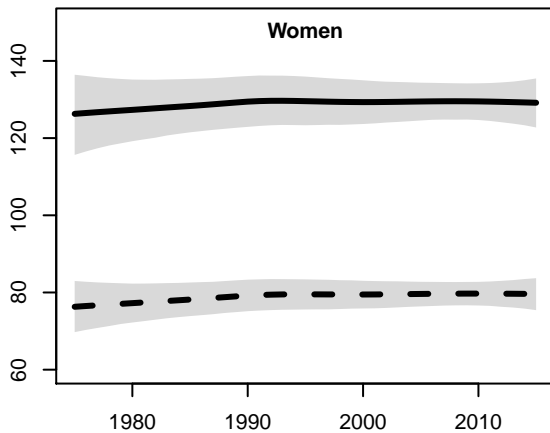

**Libya**  
Middle East and North Africa

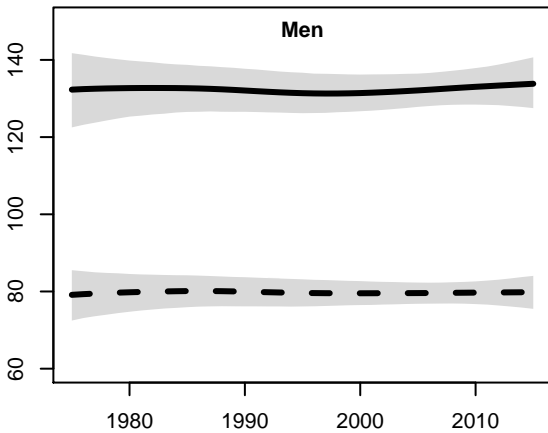

**Libya**  
Middle East and North Africa

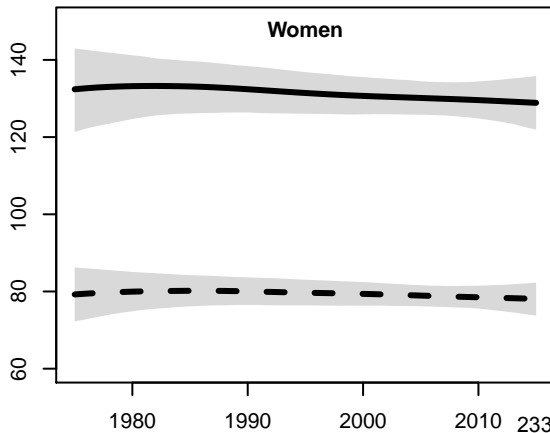

**Lithuania**  
Eastern Europe

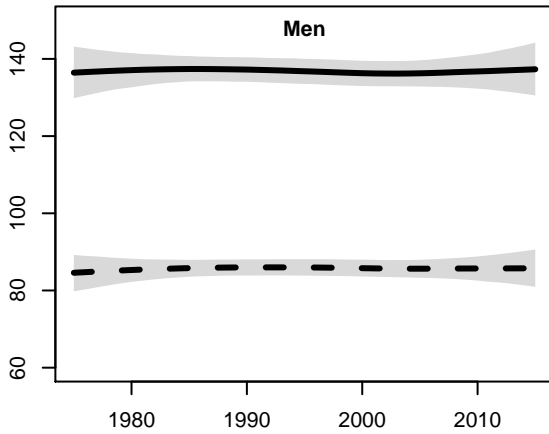

**Lithuania**  
Eastern Europe

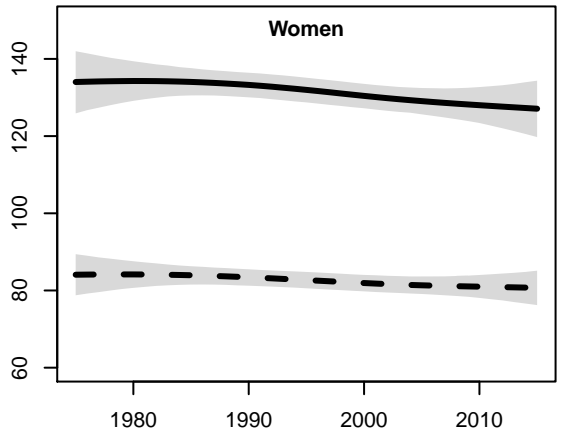

**Luxembourg**  
North Western Europe

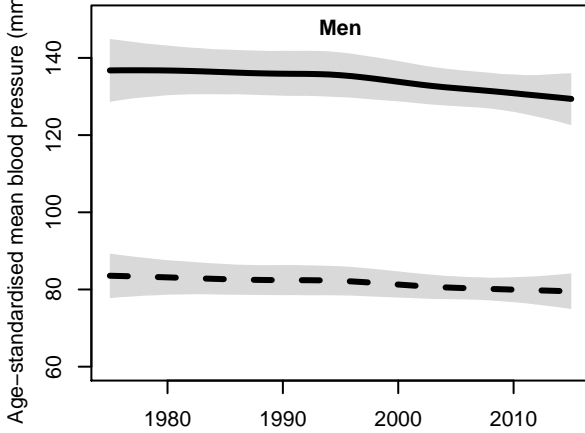

**Luxembourg**  
North Western Europe

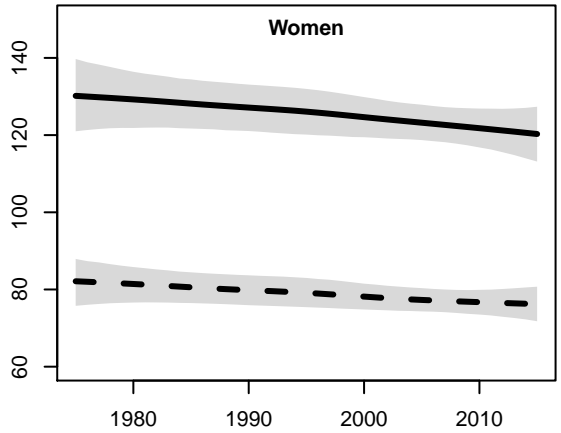

**Macedonia (TFYR)**  
Central Europe

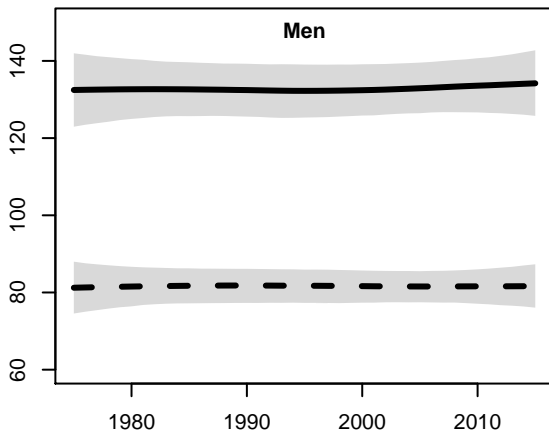

**Macedonia (TFYR)**  
Central Europe

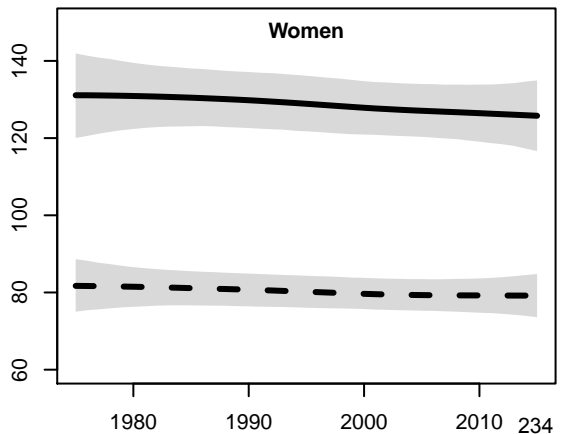

**Madagascar**

East Africa

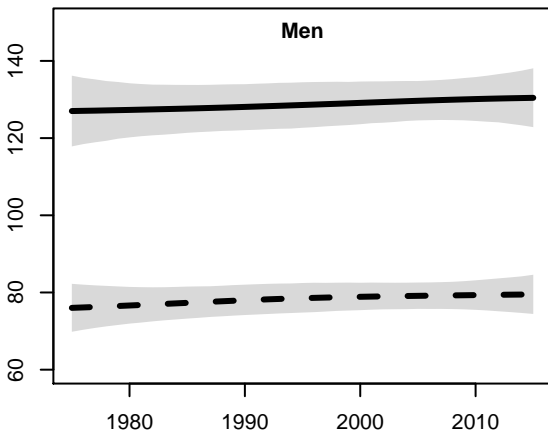**Madagascar**

East Africa

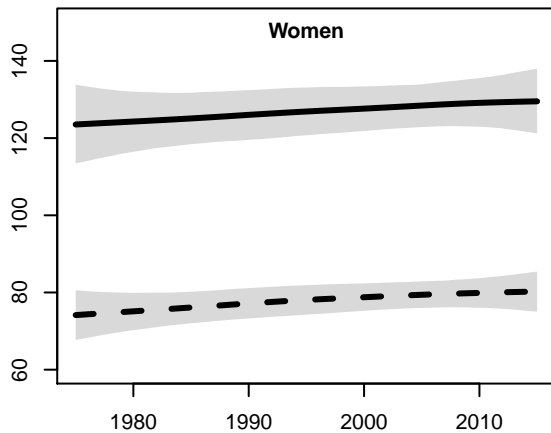**Malawi**

East Africa

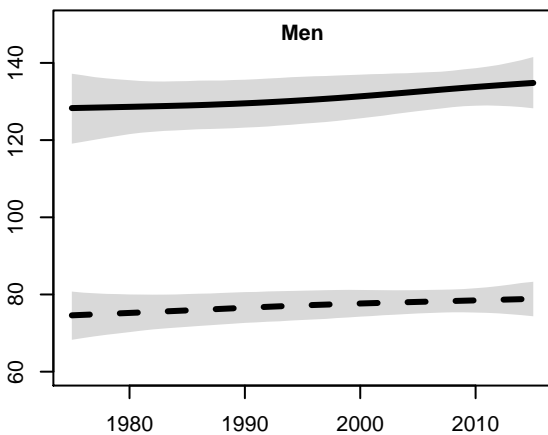**Malawi**

East Africa

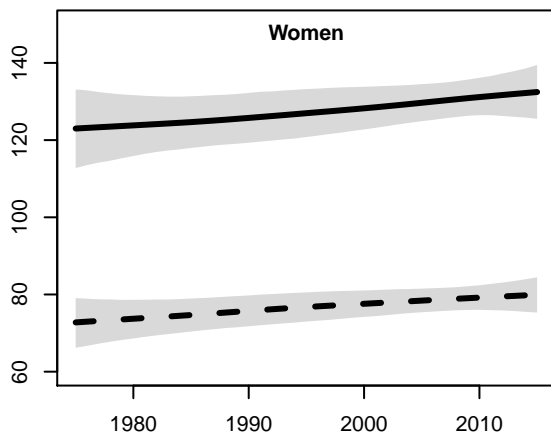**Malaysia**

Southeast Asia

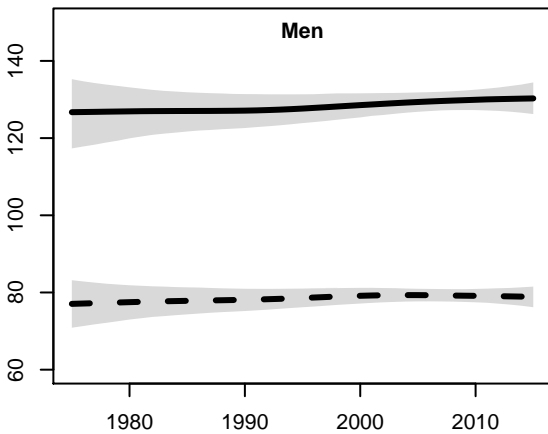**Malaysia**

Southeast Asia

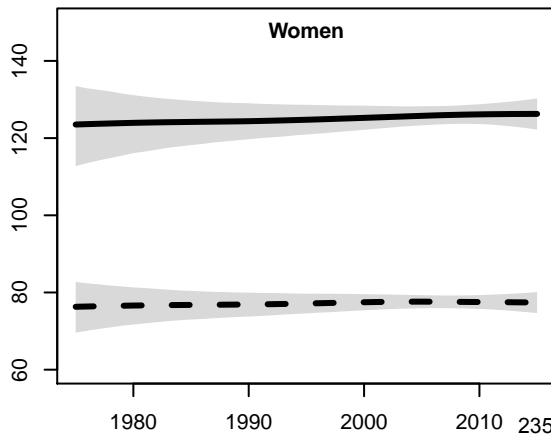

Age-standardised mean blood pressure (mmHg)

**Maldives**

Southeast Asia

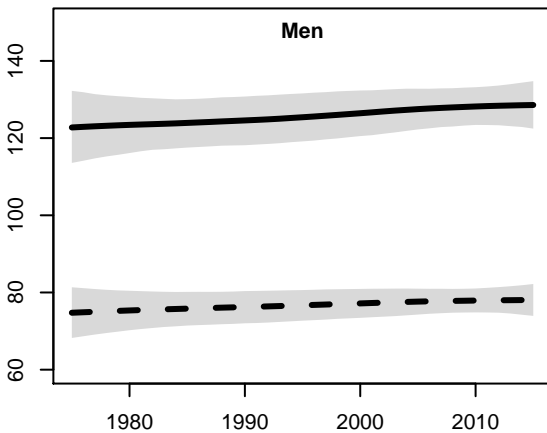**Maldives**

Southeast Asia

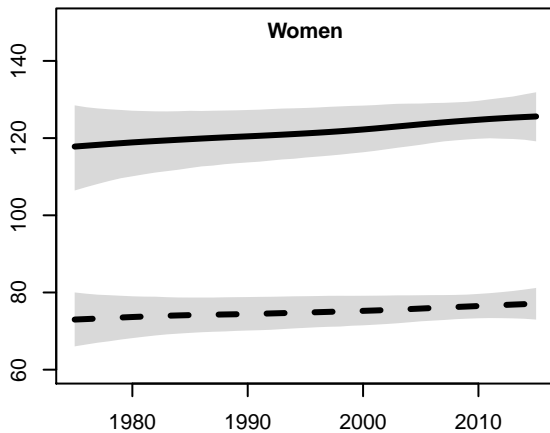**Mali**

West Africa

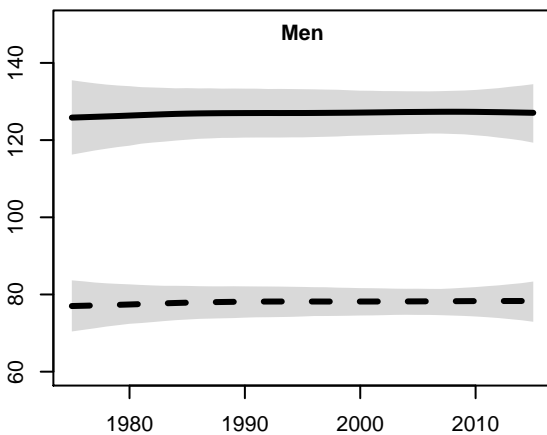**Mali**

West Africa

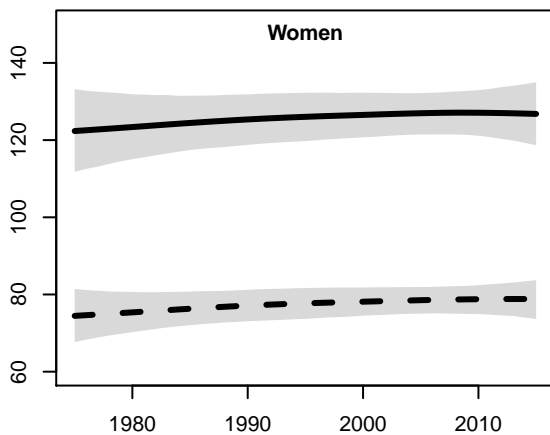**Malta**

South Western Europe

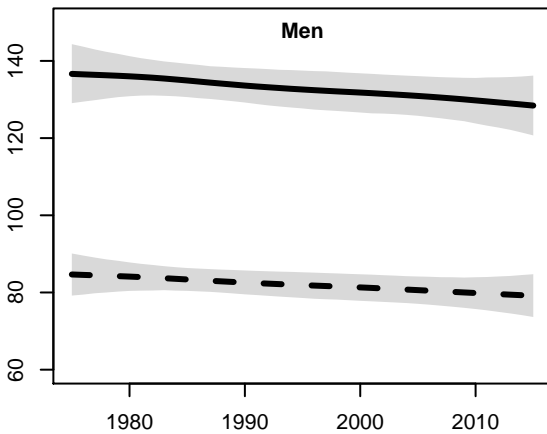**Malta**

South Western Europe

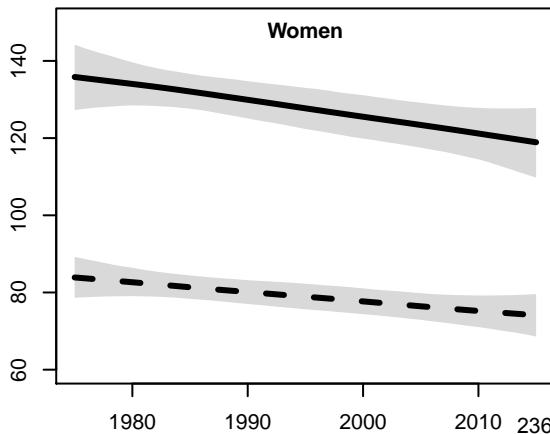

**Marshall Islands**  
Polynesia and Micronesia

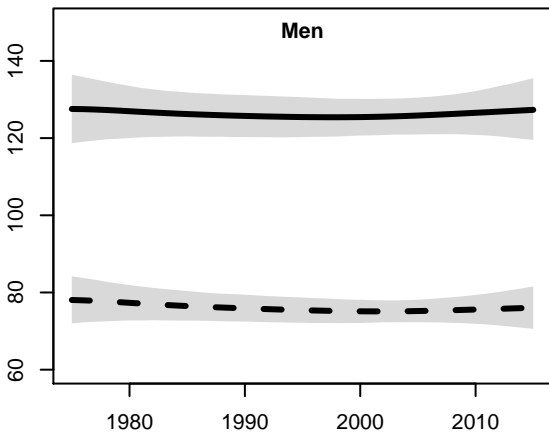

**Marshall Islands**  
Polynesia and Micronesia

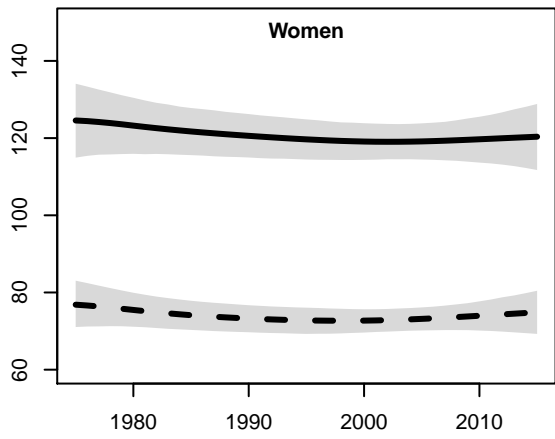

**Mauritania**  
West Africa

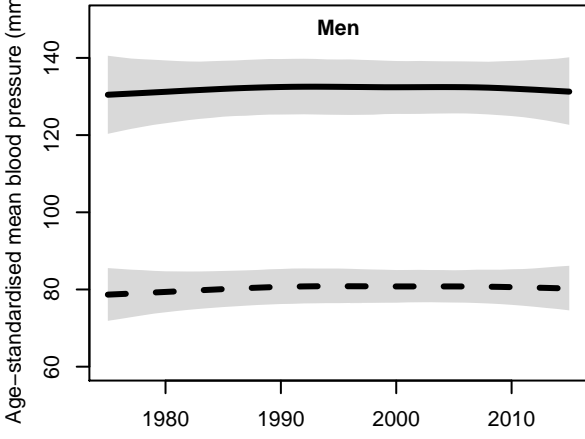

**Mauritania**  
West Africa

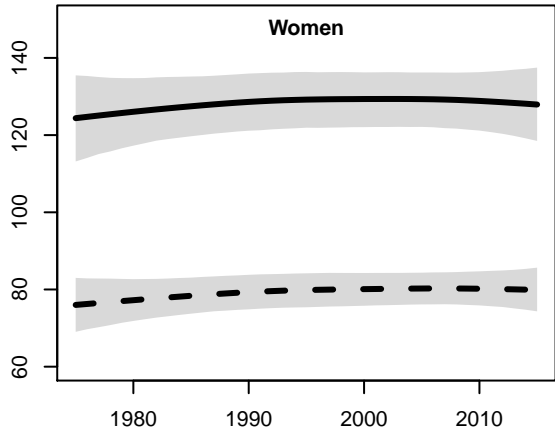

**Mauritius**  
East Africa

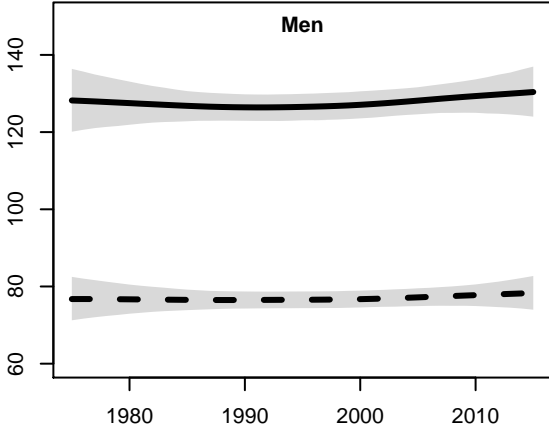

**Mauritius**  
East Africa

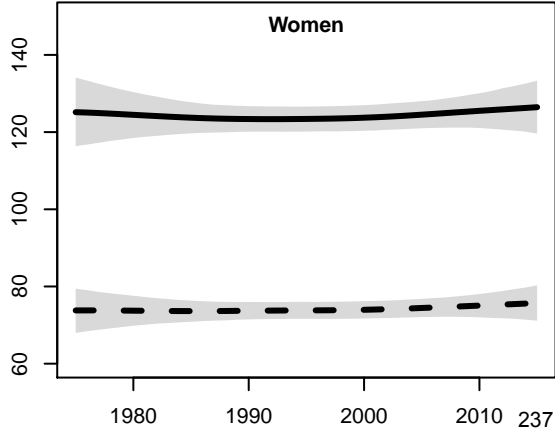

**Mexico**  
Central Latin America

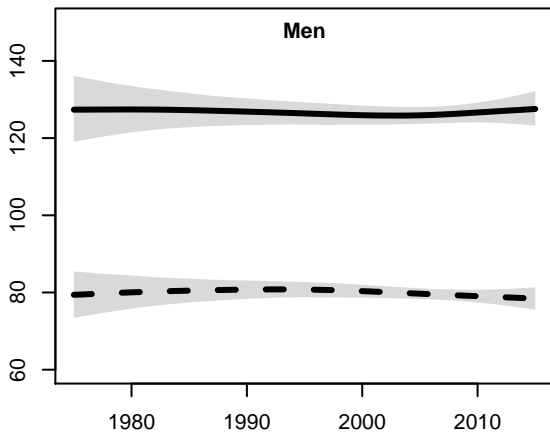

**Mexico**  
Central Latin America

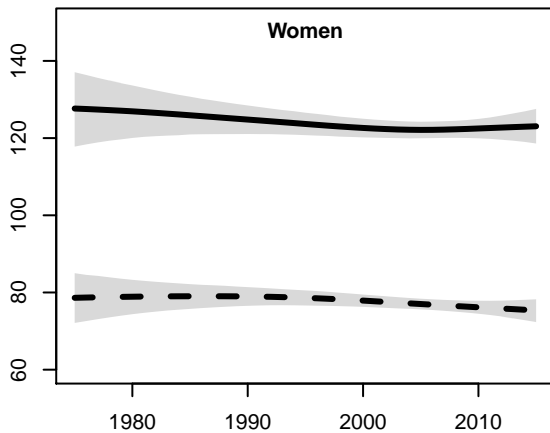

**Micronesia (Federated States of)**  
Polynesia and Micronesia

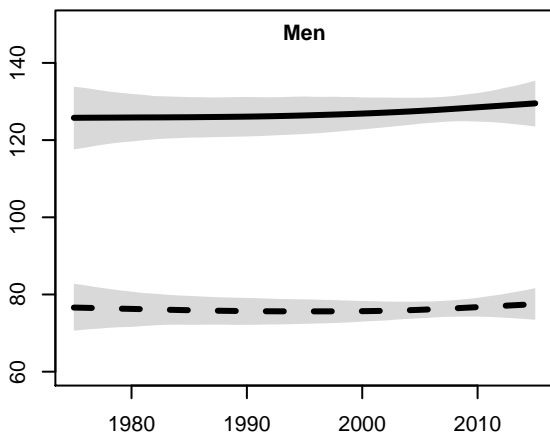

**Micronesia (Federated States of)**  
Polynesia and Micronesia

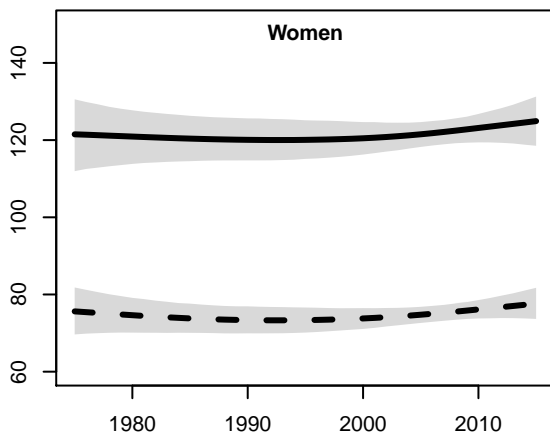

**Moldova**  
Eastern Europe

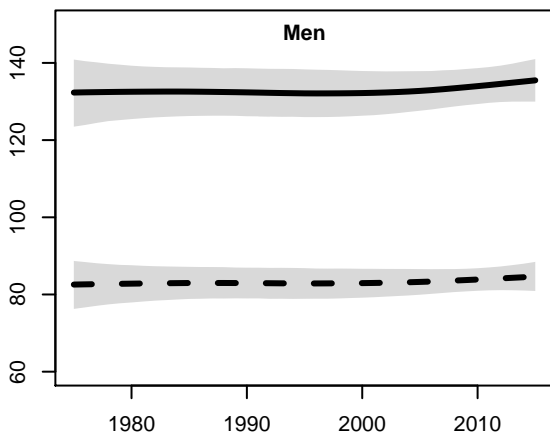

**Moldova**  
Eastern Europe

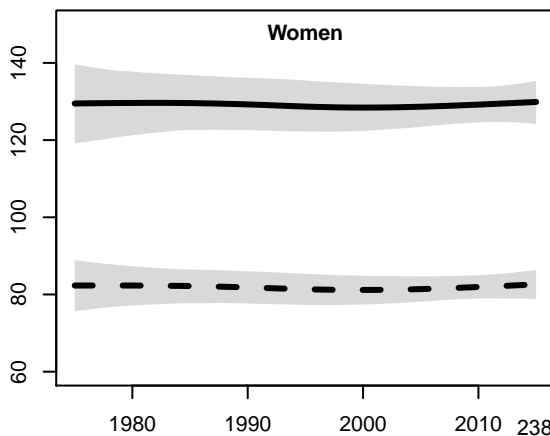



**Mongolia**  
Central Asia

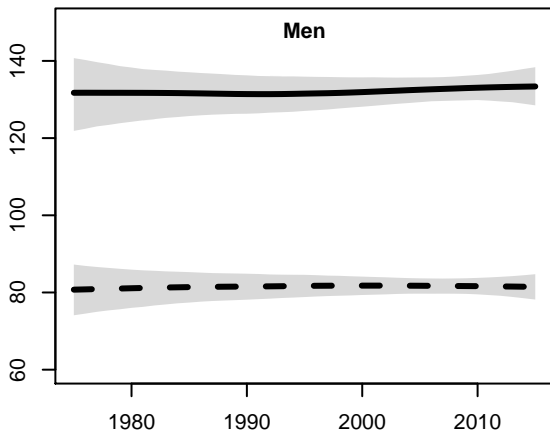

**Mongolia**  
Central Asia

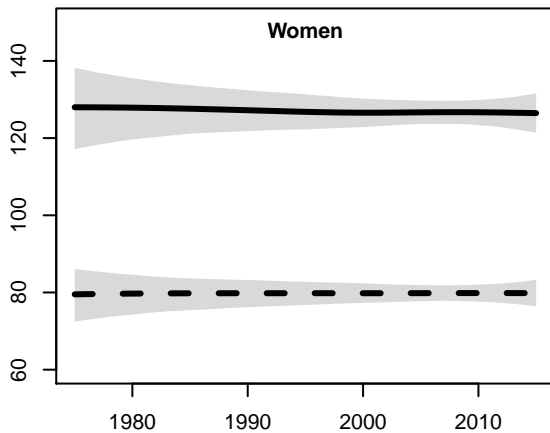

**Montenegro**  
Central Europe

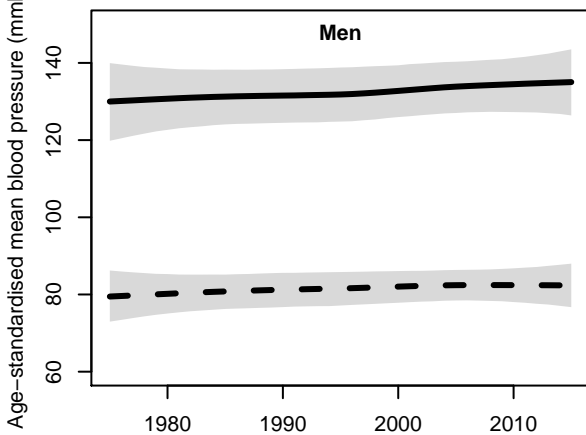

**Montenegro**  
Central Europe

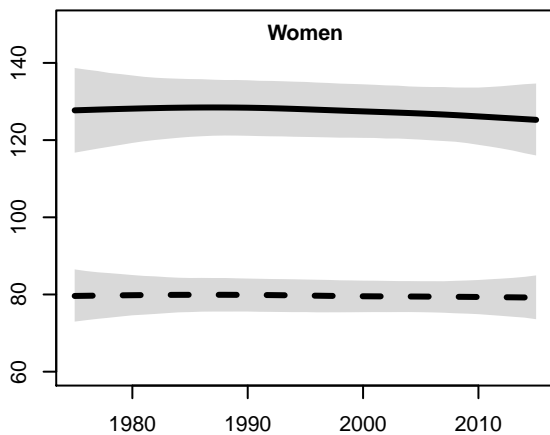

**Morocco**  
Middle East and North Africa

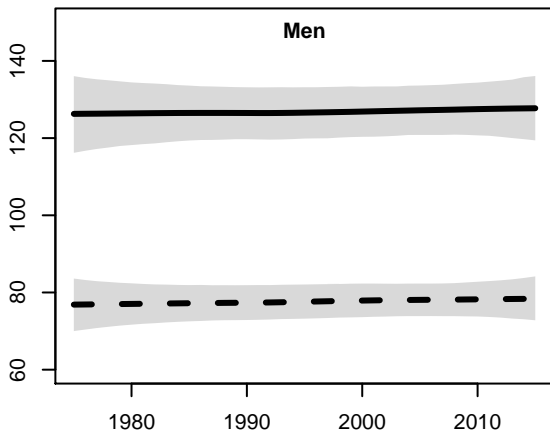

**Morocco**  
Middle East and North Africa

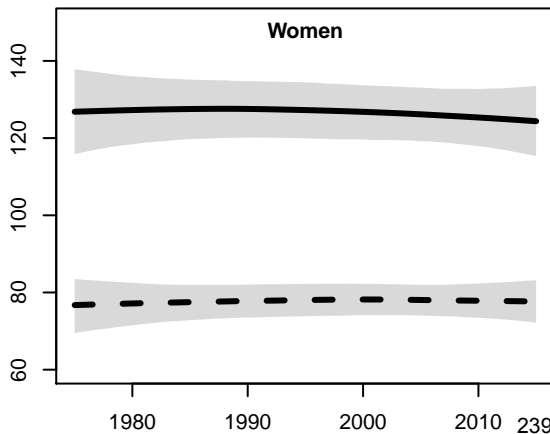

Age-standardised mean blood pressure (mmHg)

**Mozambique**  
East Africa

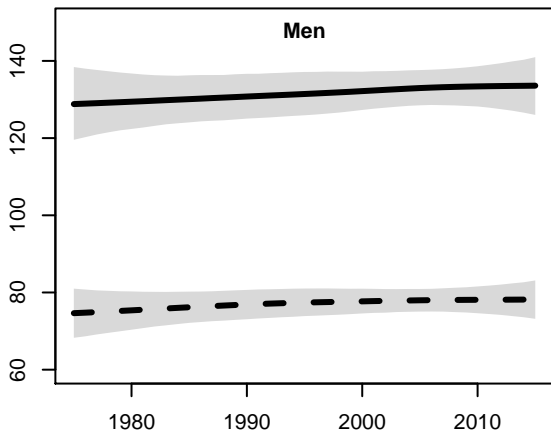

**Mozambique**  
East Africa

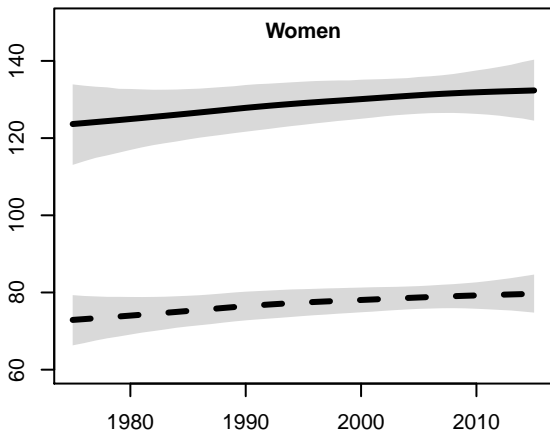

**Myanmar**  
Southeast Asia

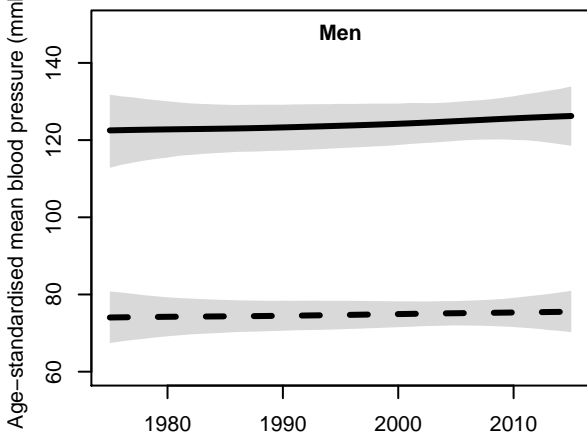

**Myanmar**  
Southeast Asia

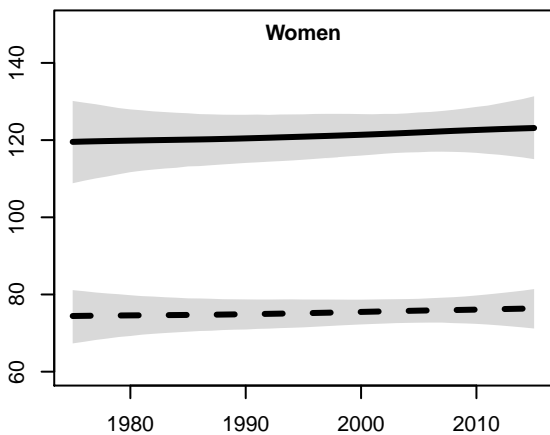

**Namibia**  
Southern Africa

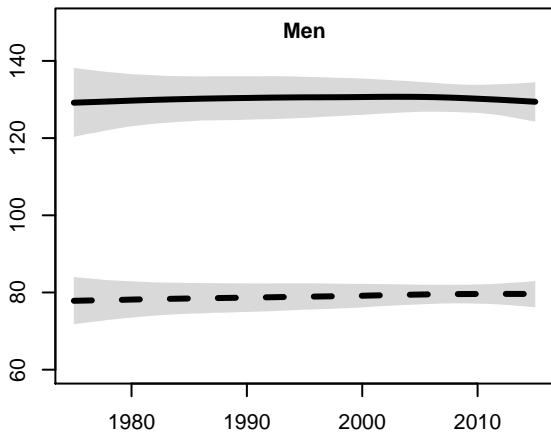

**Namibia**  
Southern Africa

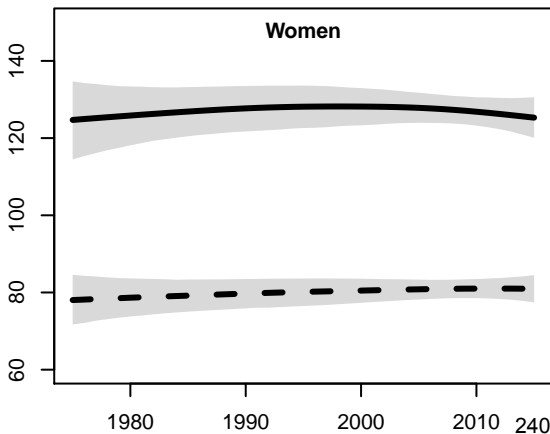

**Nauru**  
Polynesia and Micronesia

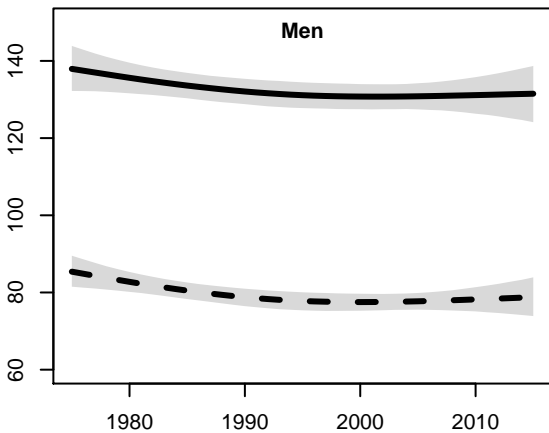

**Nauru**  
Polynesia and Micronesia

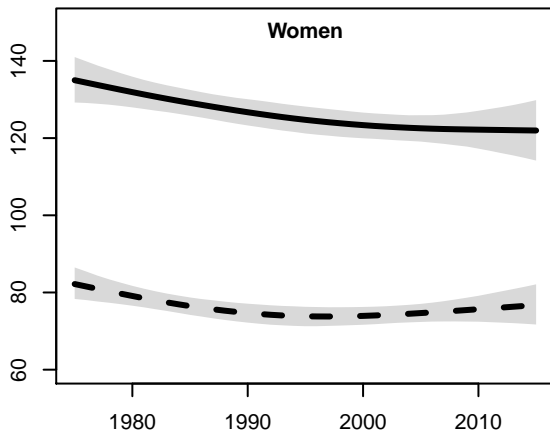

**Nepal**  
South Asia

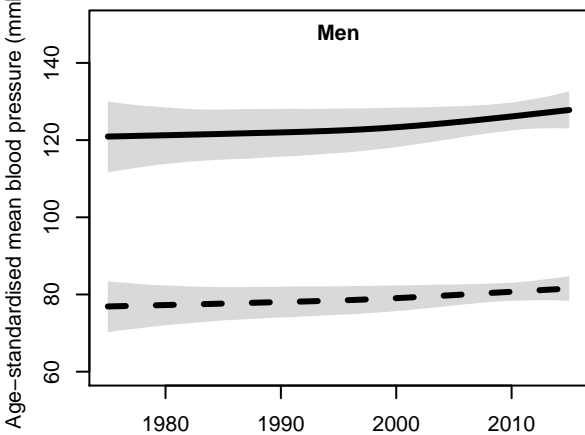

**Nepal**  
South Asia

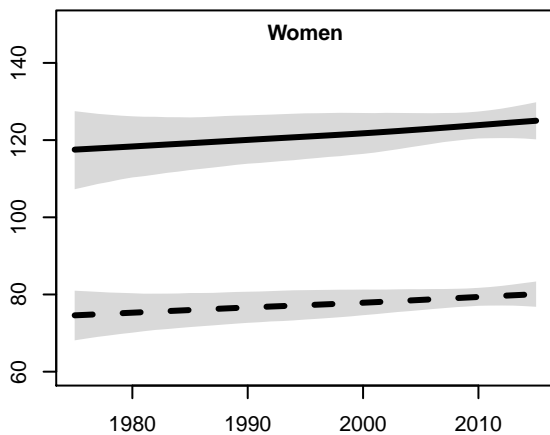

**Netherlands**  
North Western Europe

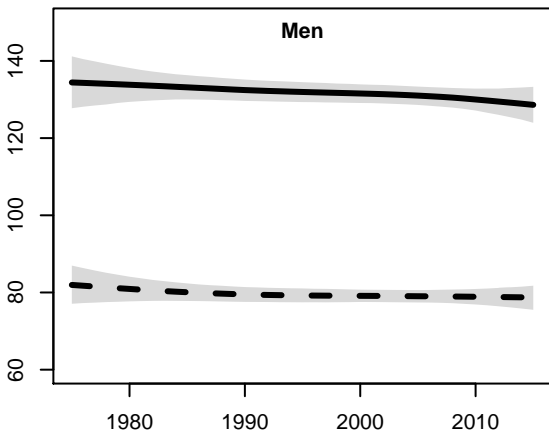

**Netherlands**  
North Western Europe

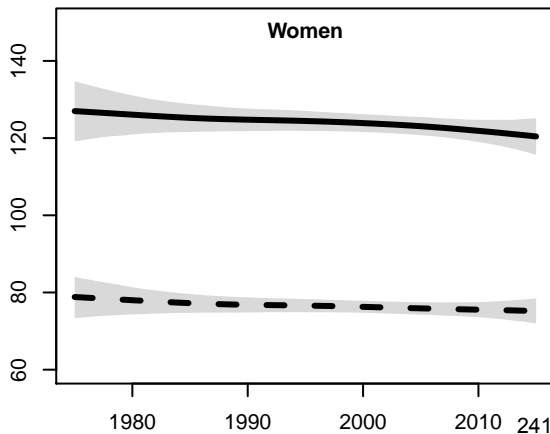

### New Zealand

High-income English-speaking countries

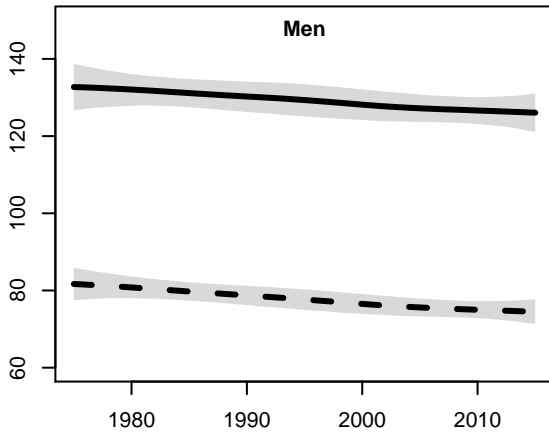

### New Zealand

High-income English-speaking countries

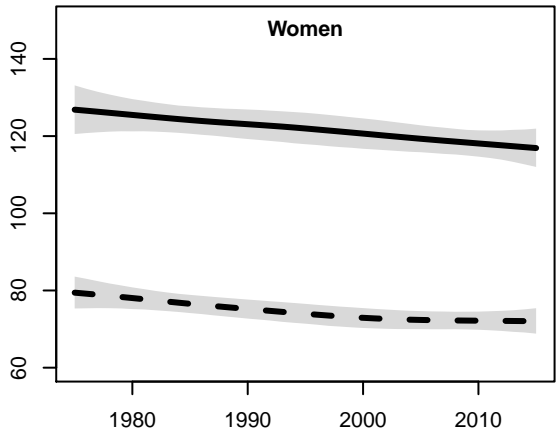

### Nicaragua

Central Latin America

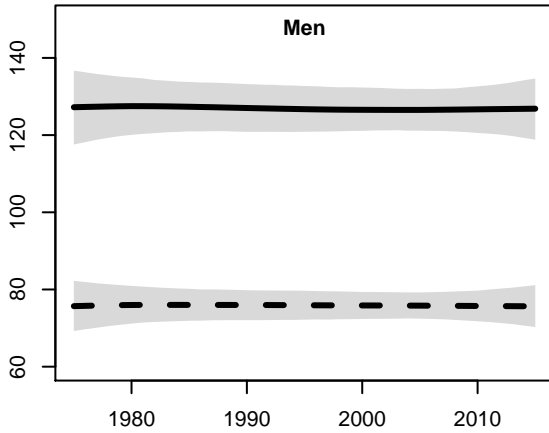

### Nicaragua

Central Latin America

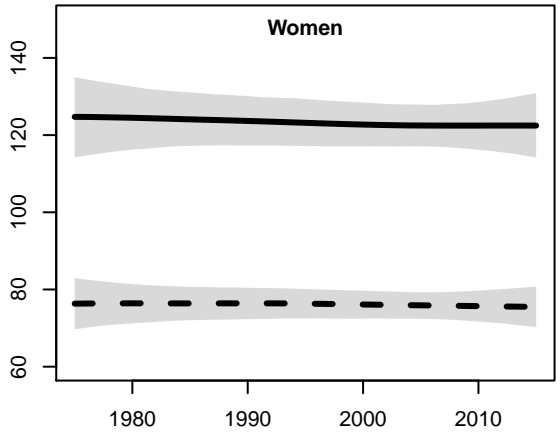

### Niger

West Africa

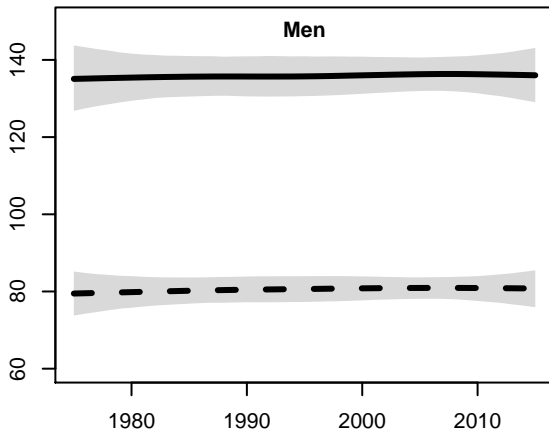

### Niger

West Africa

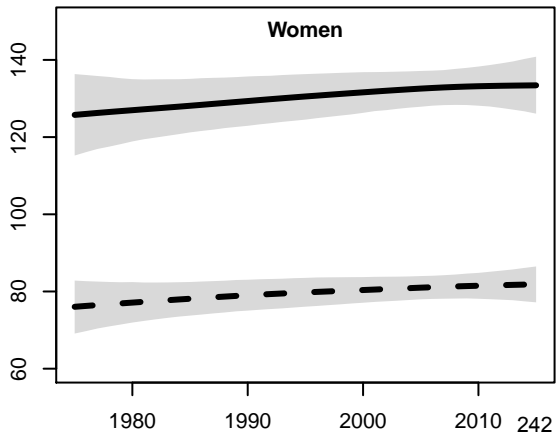

Age-standardised mean blood pressure (mmHg)

**Nigeria**  
West Africa

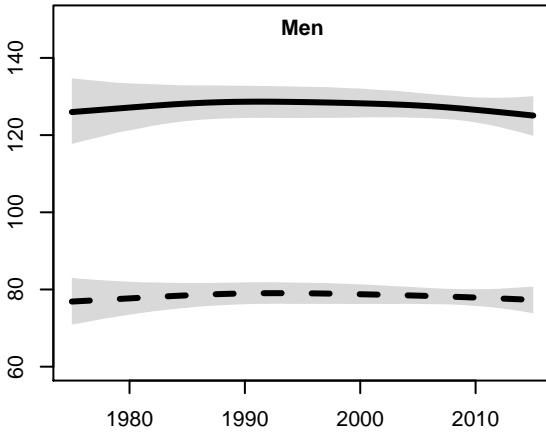

**Nigeria**  
West Africa

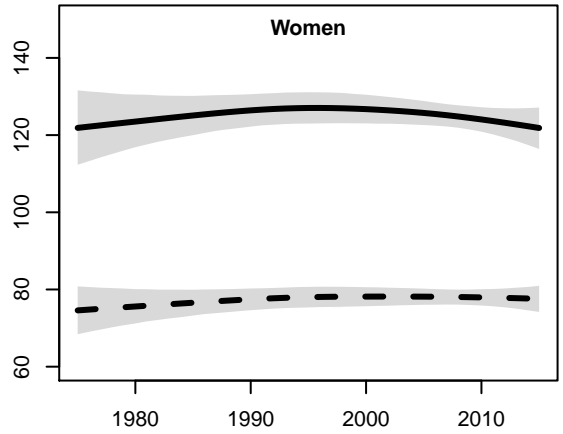

**Niue**  
Polynesia and Micronesia

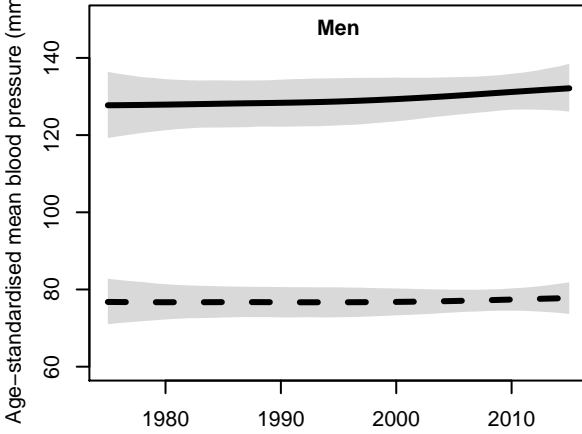

**Niue**  
Polynesia and Micronesia

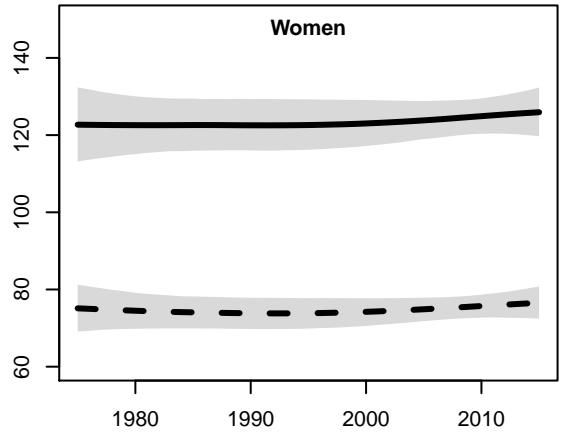

**North Korea**  
East Asia

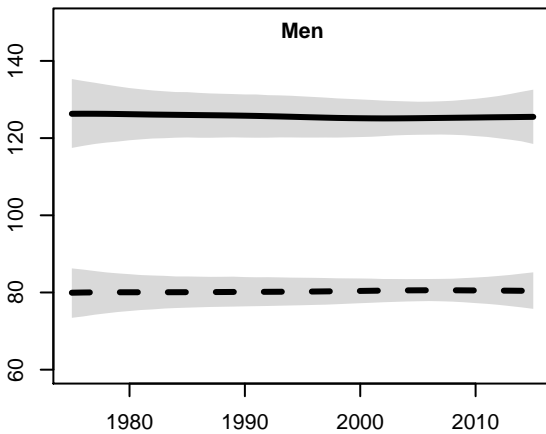

**North Korea**  
East Asia

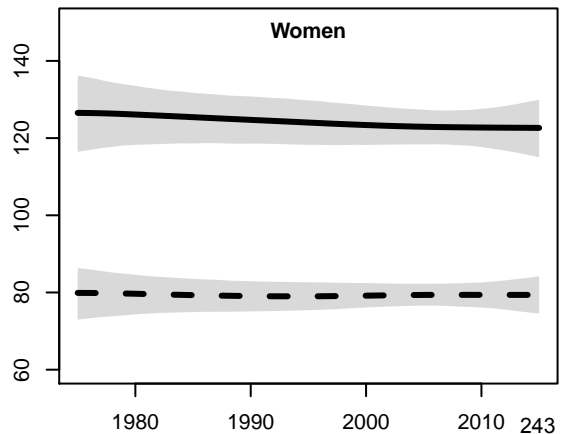

**Norway**  
North Western Europe

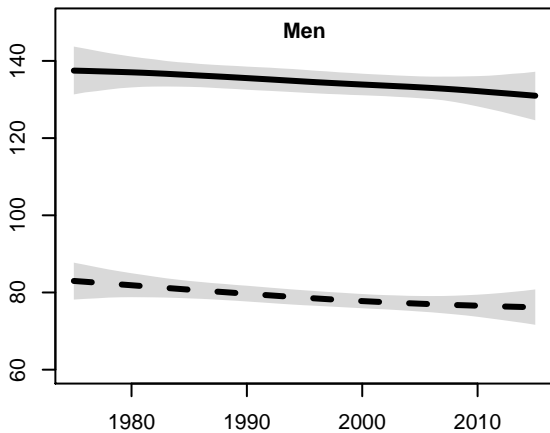

**Norway**  
North Western Europe

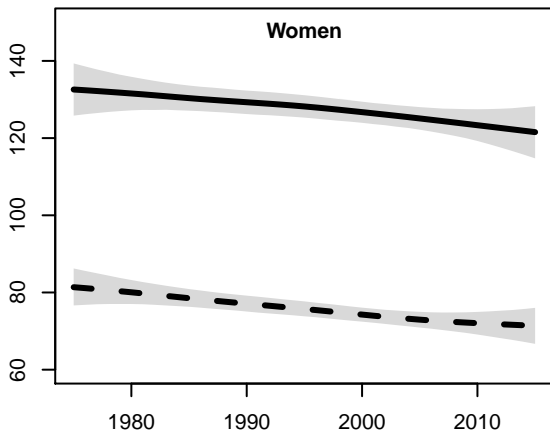

**Occupied Palestinian Territory**  
Middle East and North Africa

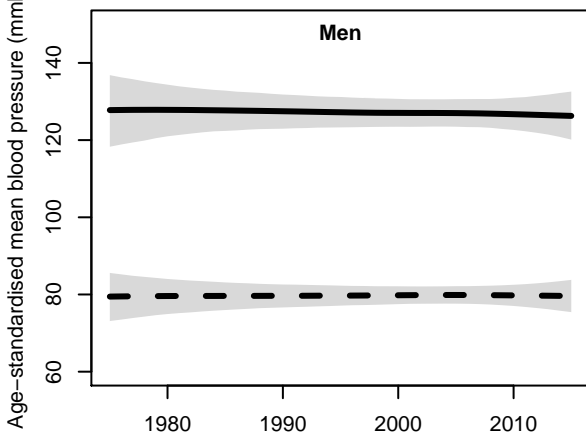

**Occupied Palestinian Territory**  
Middle East and North Africa

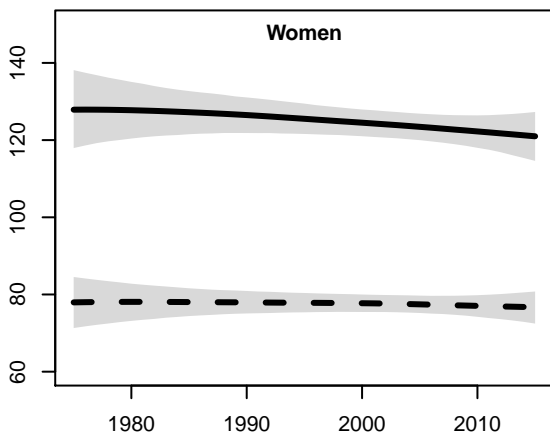

**Oman**  
Middle East and North Africa

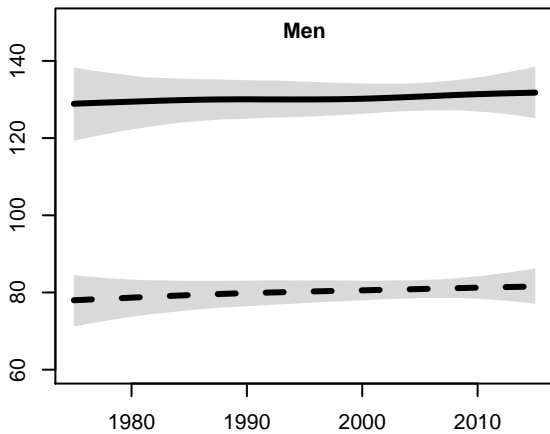

**Oman**  
Middle East and North Africa

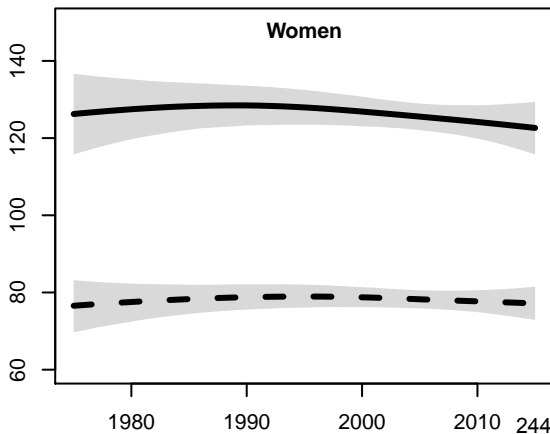

**Pakistan**  
South Asia

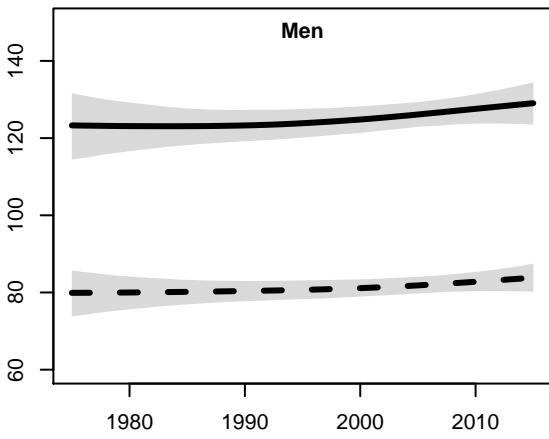

**Pakistan**  
South Asia

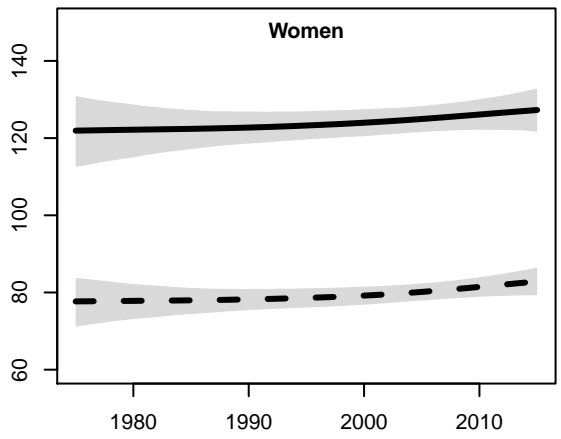

**Palau**  
Polynesia and Micronesia

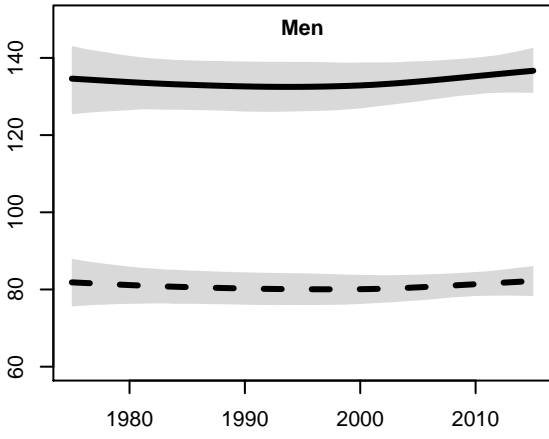

**Palau**  
Polynesia and Micronesia

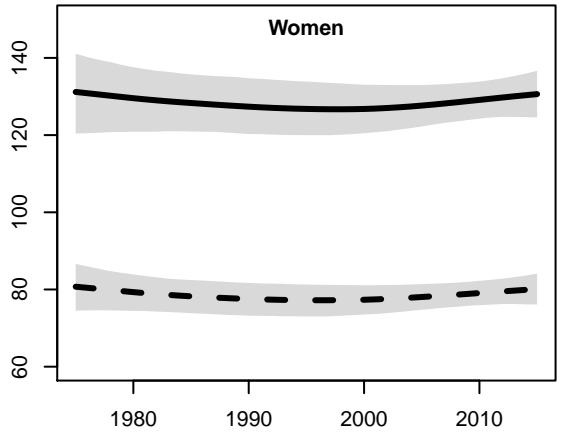

**Panama**  
Central Latin America

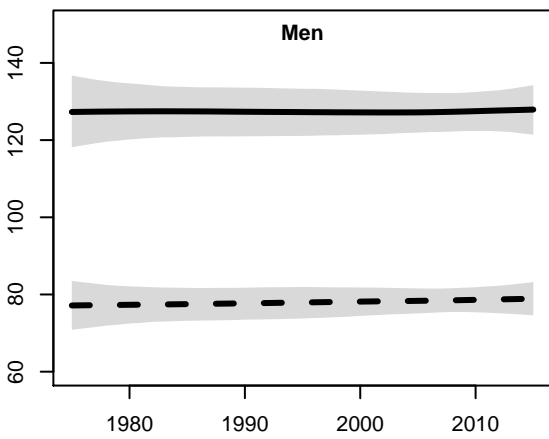

**Panama**  
Central Latin America

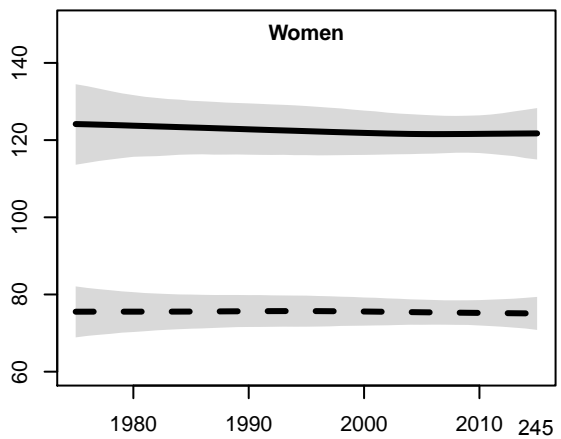

**Papua New Guinea**  
Melanesia

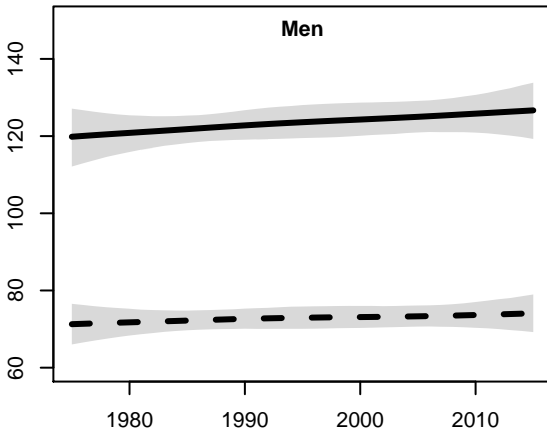

**Papua New Guinea**  
Melanesia

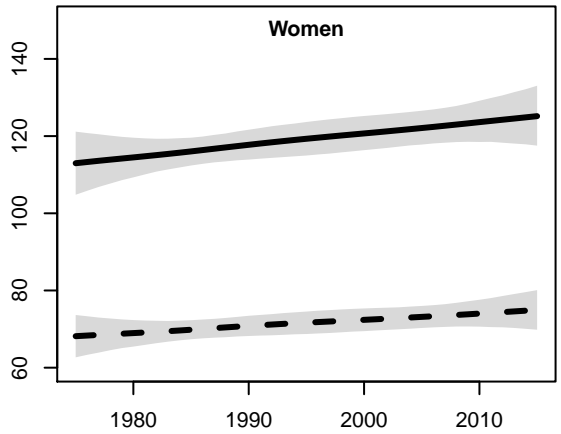

**Paraguay**  
Southern and Tropical Latin America

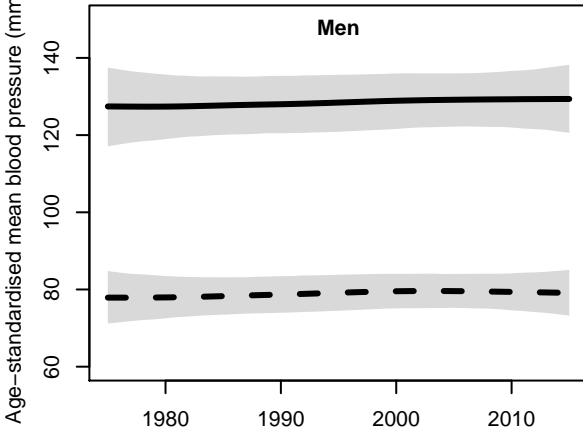

**Paraguay**  
Southern and Tropical Latin America

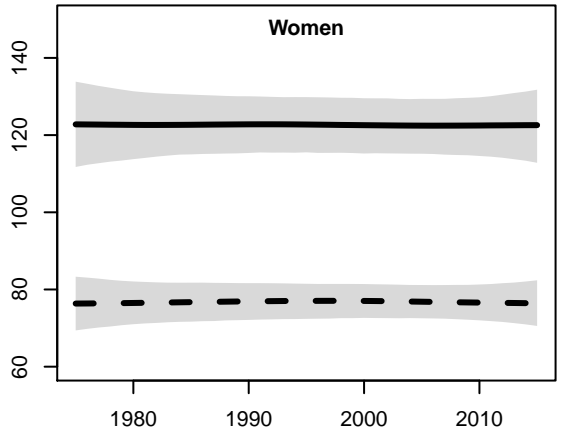

**Peru**  
Andean Latin America

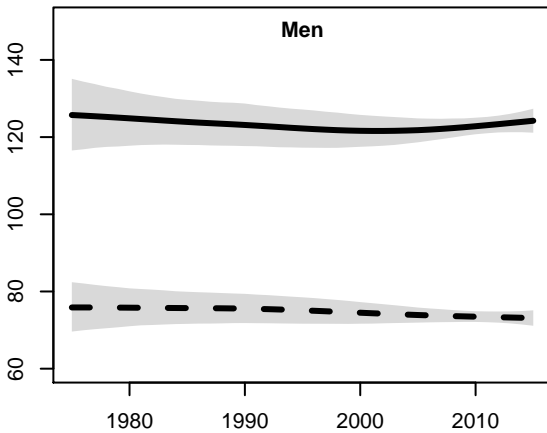

**Peru**  
Andean Latin America

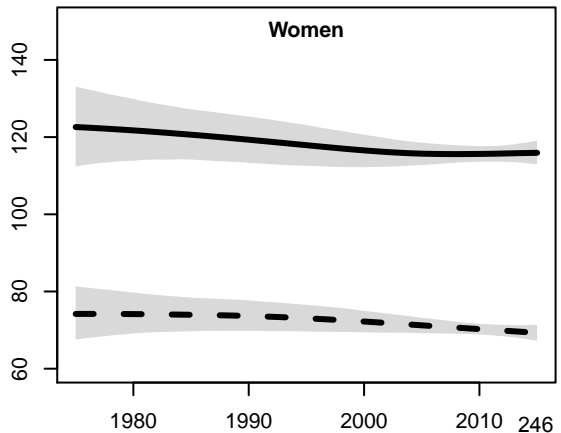



**Philippines**  
Southeast Asia

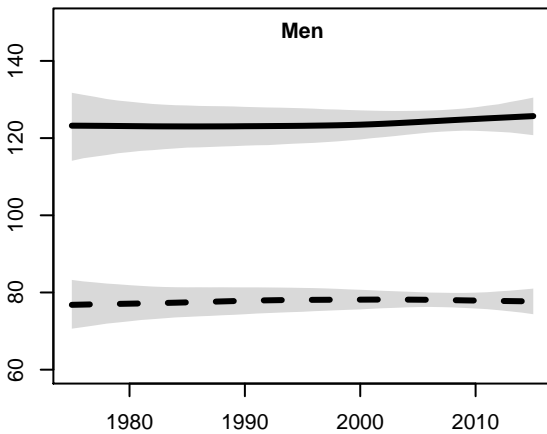

**Philippines**  
Southeast Asia

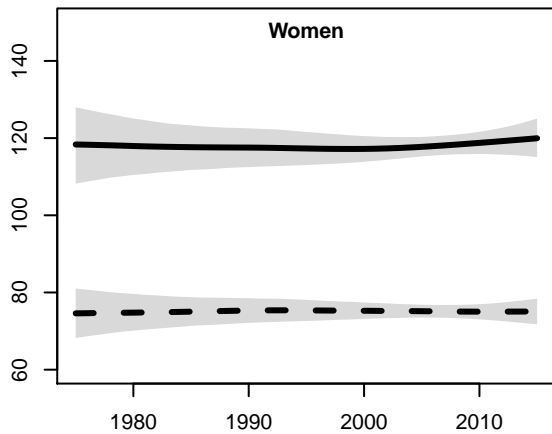

**Poland**  
Central Europe

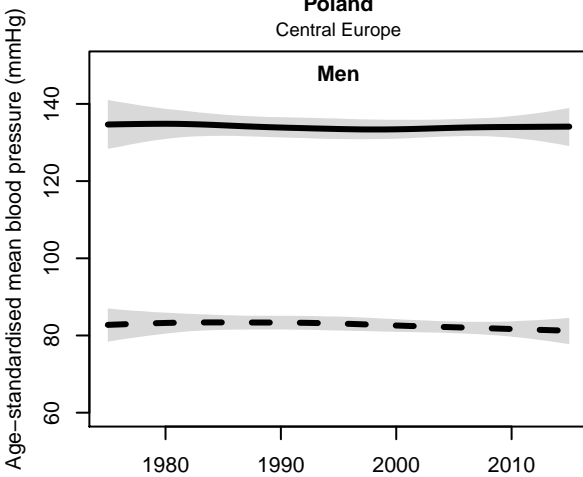

**Poland**  
Central Europe

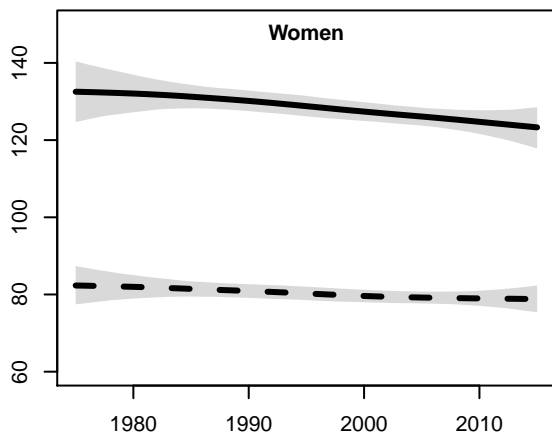

**Portugal**  
South Western Europe

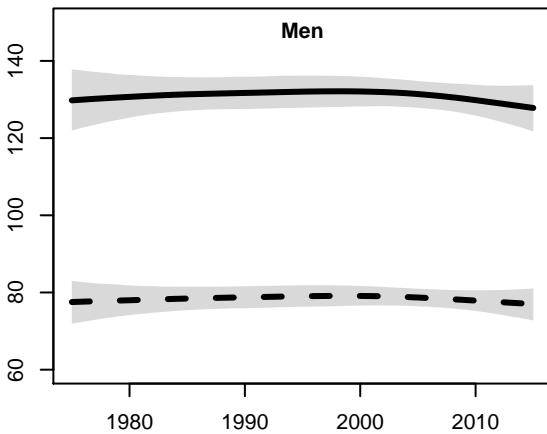

**Portugal**  
South Western Europe

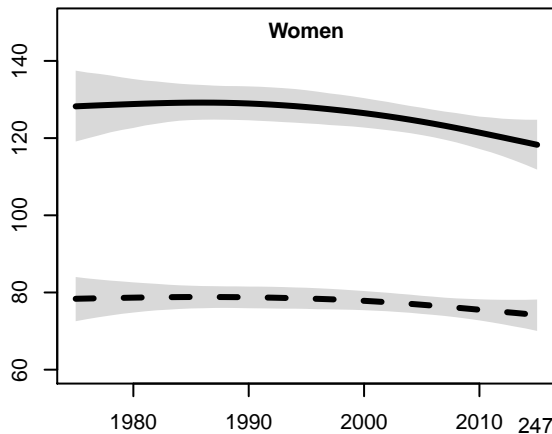

**Puerto Rico**  
Caribbean

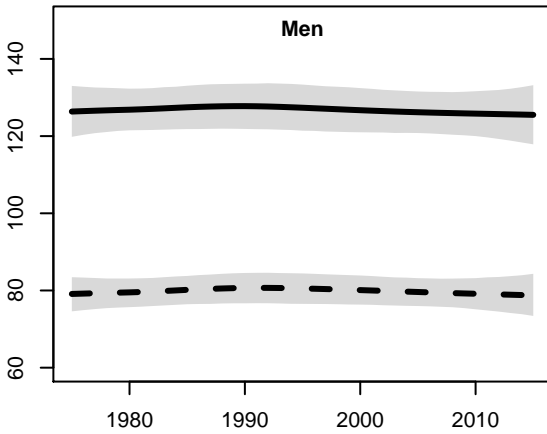

**Puerto Rico**  
Caribbean

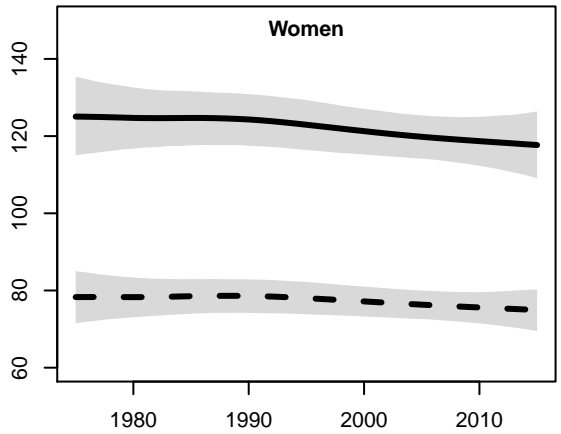

**Qatar**  
Middle East and North Africa

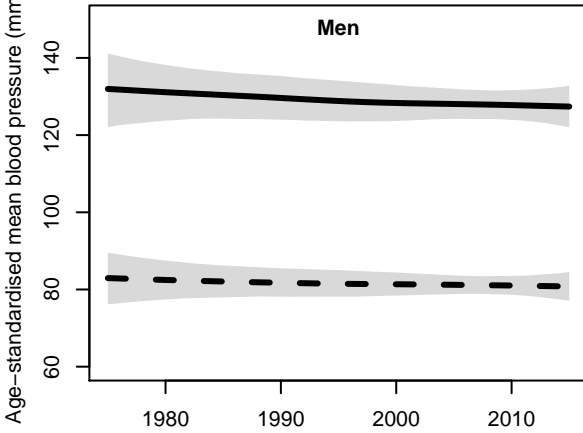

**Qatar**  
Middle East and North Africa

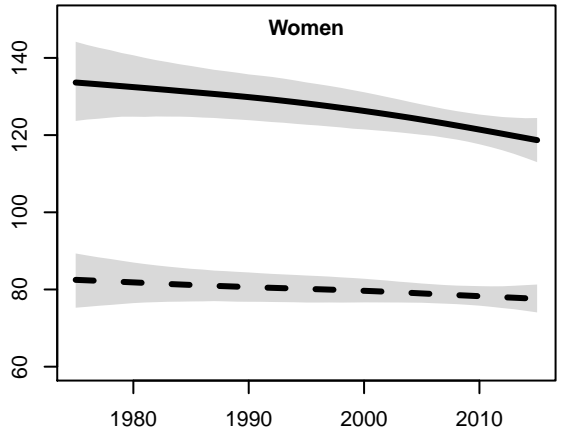

**Romania**  
Central Europe

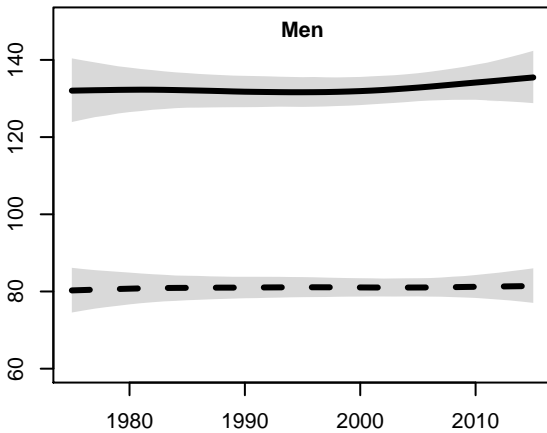

**Romania**  
Central Europe

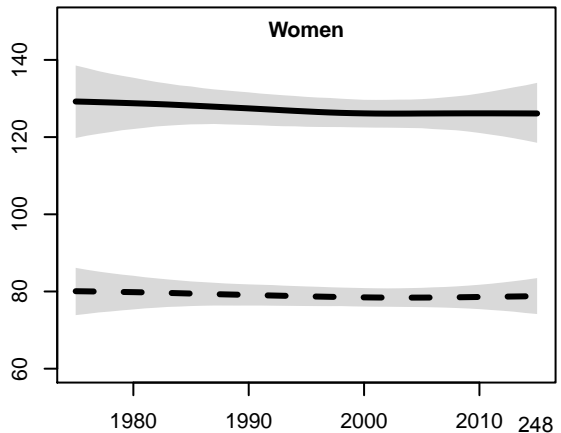

**Russian Federation**  
Eastern Europe

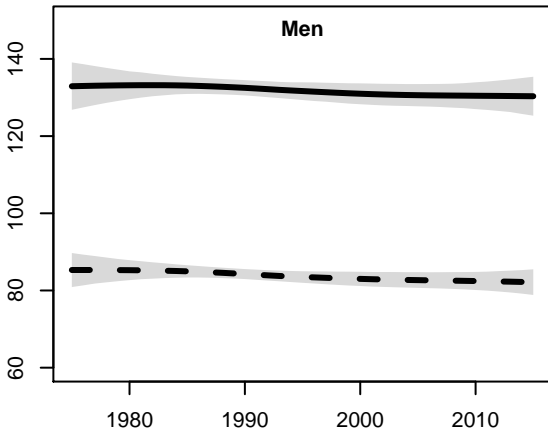

**Russian Federation**  
Eastern Europe

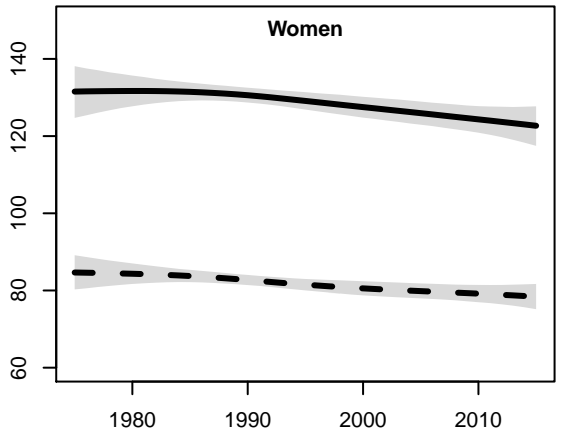

**Rwanda**  
East Africa

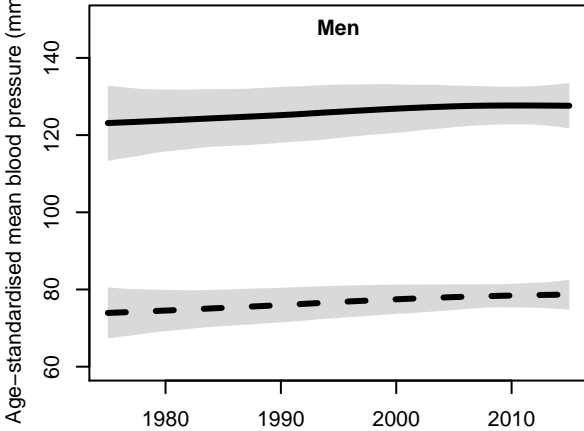

**Rwanda**  
East Africa

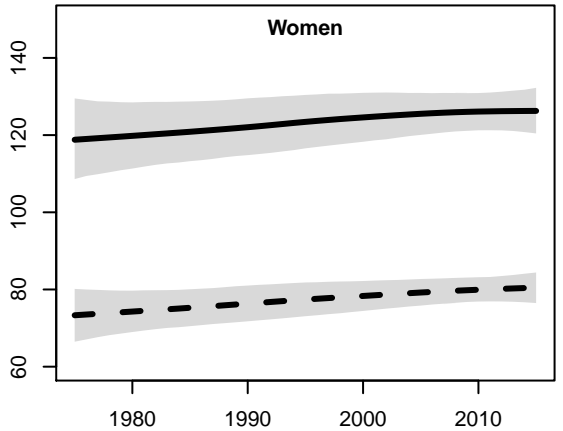

**Saint Kitts and Nevis**  
Caribbean

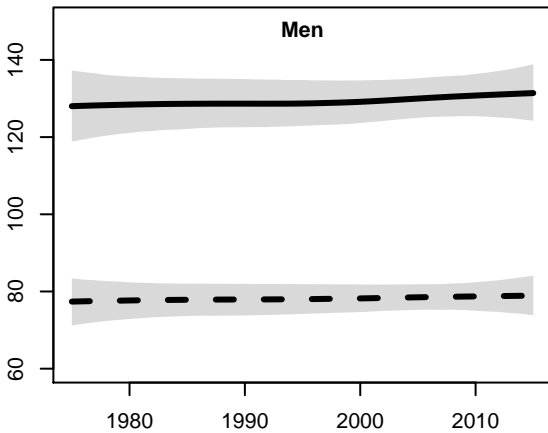

**Saint Kitts and Nevis**  
Caribbean

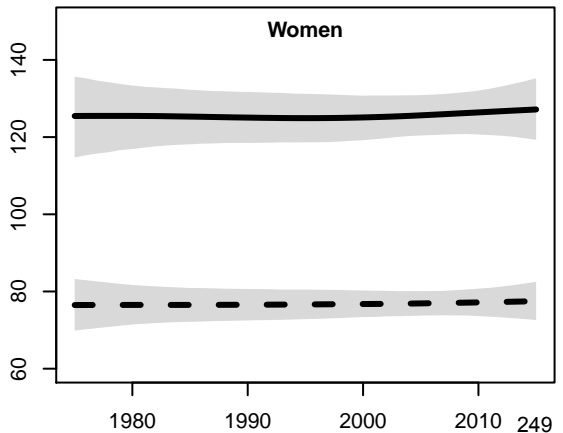

**Saint Lucia**

Caribbean

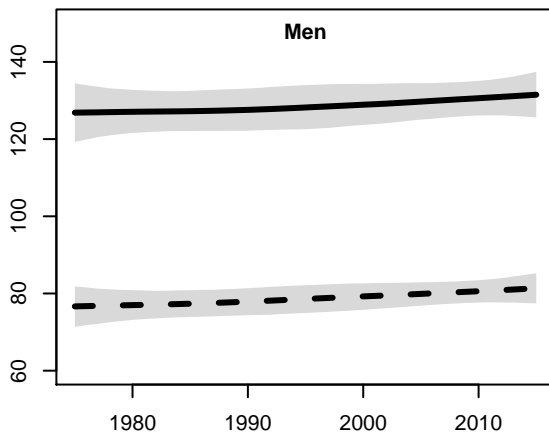**Saint Lucia**

Caribbean

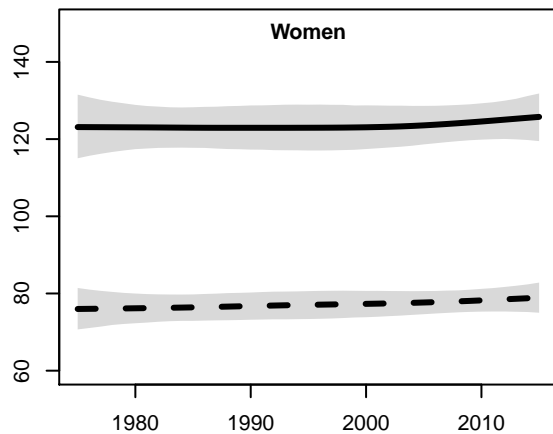**Saint Vincent and the Grenadines**

Caribbean

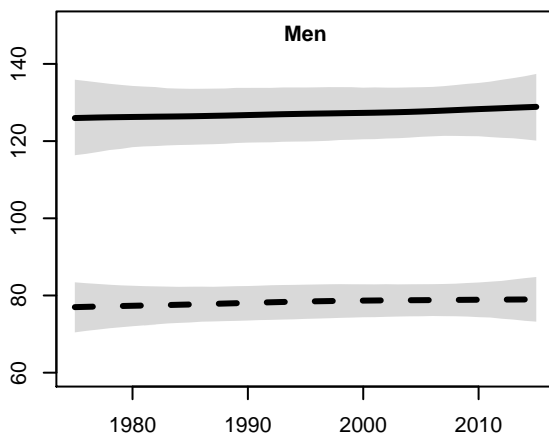**Saint Vincent and the Grenadines**

Caribbean

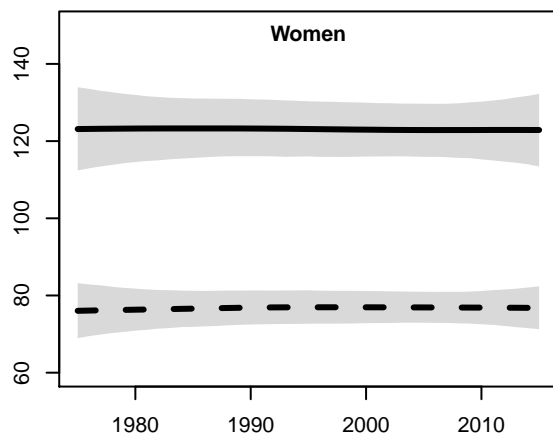**Samoa**

Polynesia and Micronesia

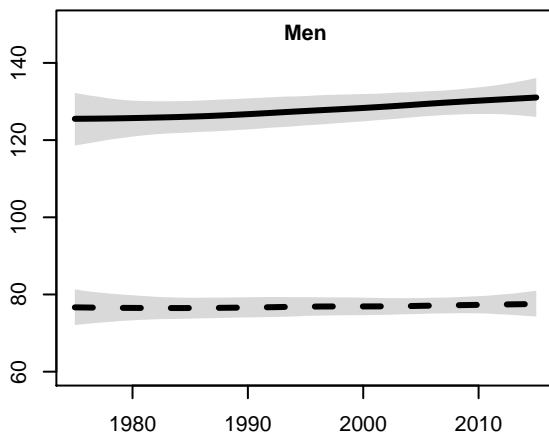**Samoa**

Polynesia and Micronesia

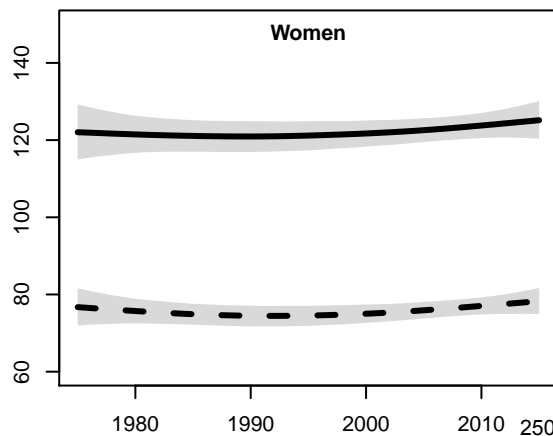

### Sao Tome and Principe

West Africa

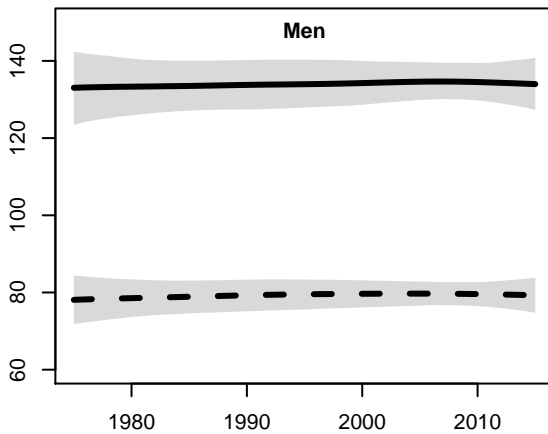

### Sao Tome and Principe

West Africa

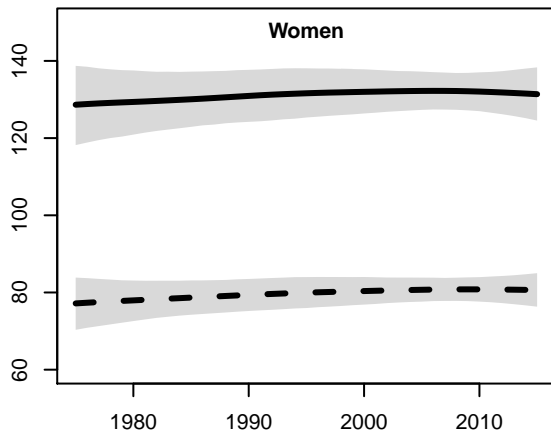

### Saudi Arabia

Middle East and North Africa

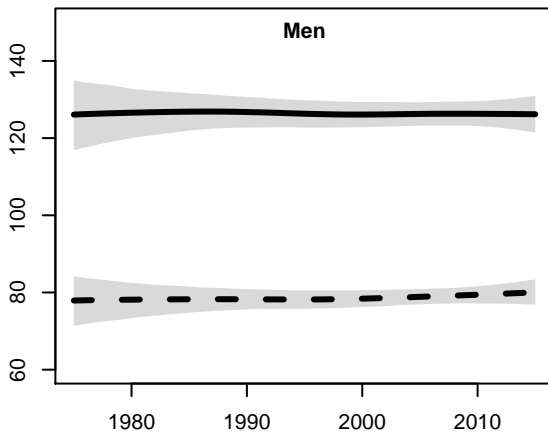

### Saudi Arabia

Middle East and North Africa

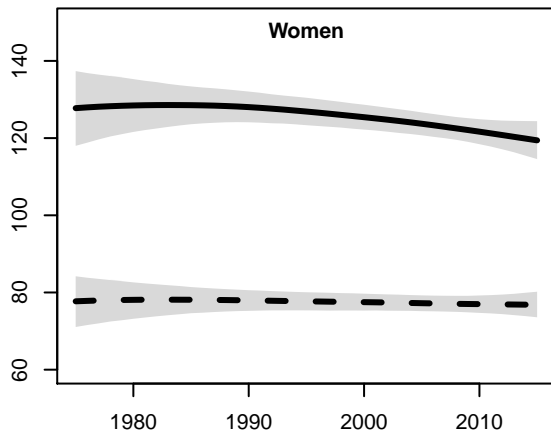

### Senegal

West Africa

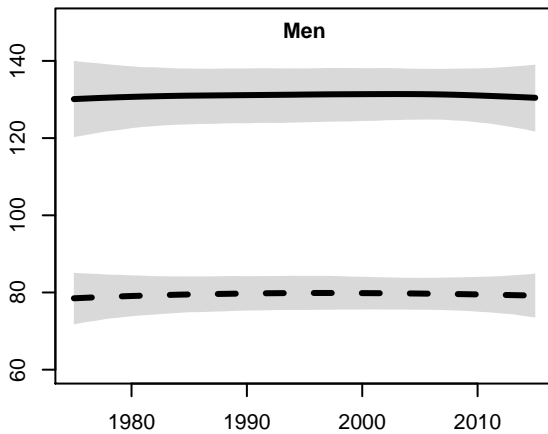

### Senegal

West Africa

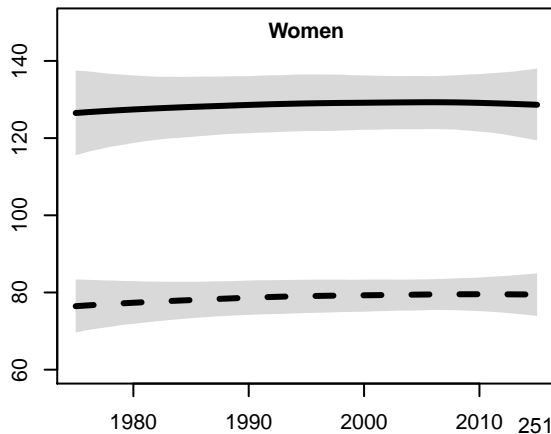

Age-standardised mean blood pressure (mmHg)

**Serbia**

Central Europe

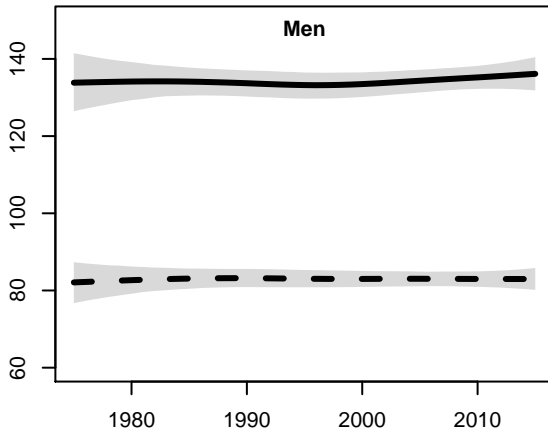**Serbia**

Central Europe

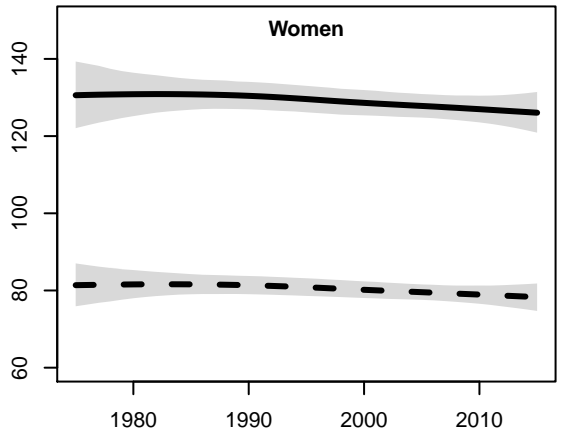**Seychelles**

East Africa

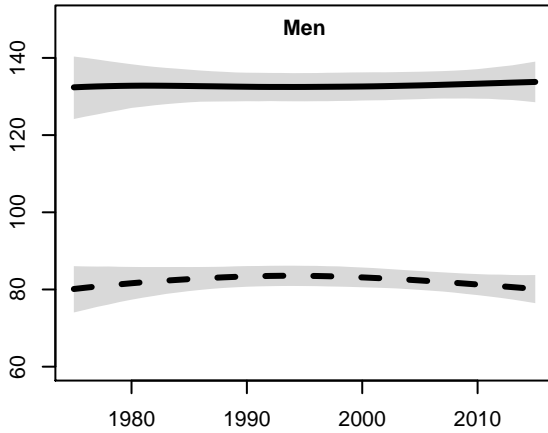**Seychelles**

East Africa

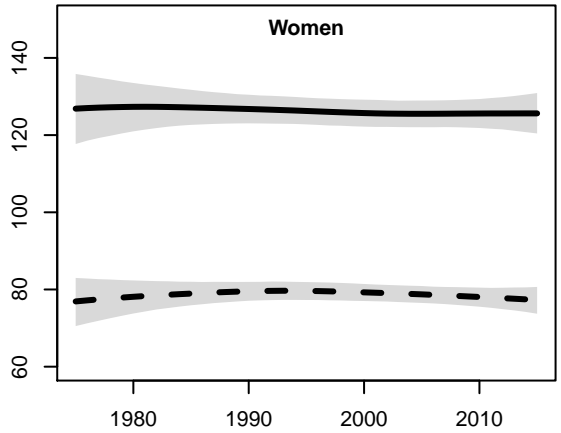**Sierra Leone**

West Africa

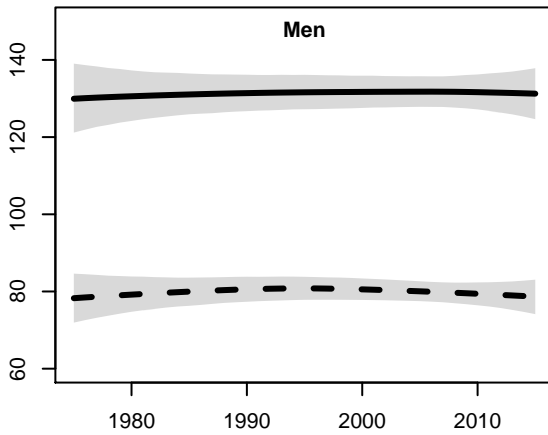**Sierra Leone**

West Africa

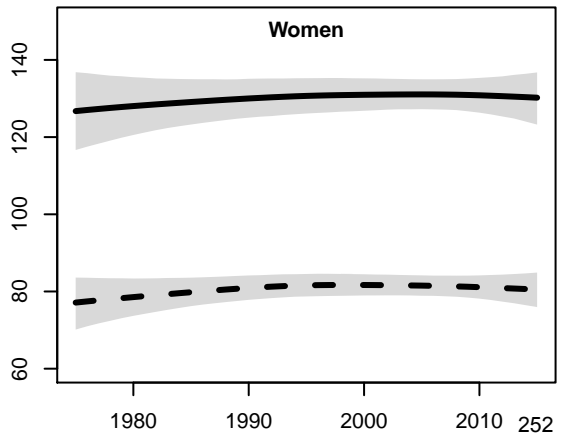

**Singapore**  
High-income Asia Pacific

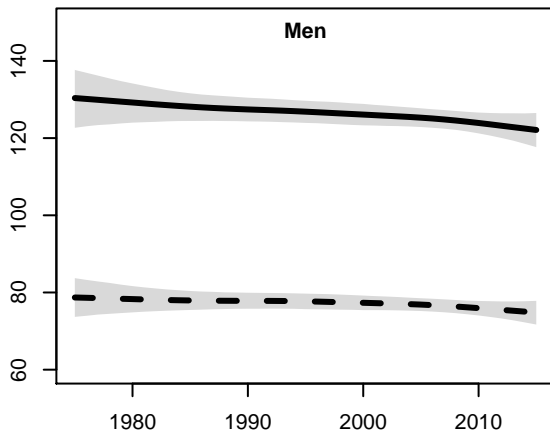

**Singapore**  
High-income Asia Pacific

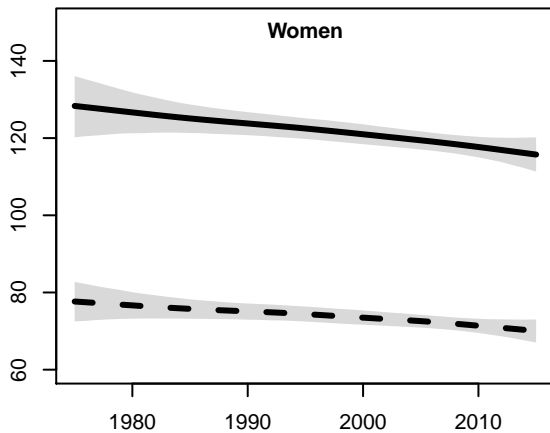

**Slovakia**  
Central Europe

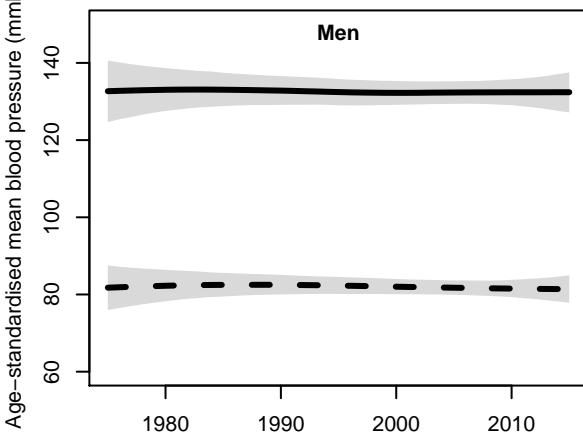

**Slovakia**  
Central Europe

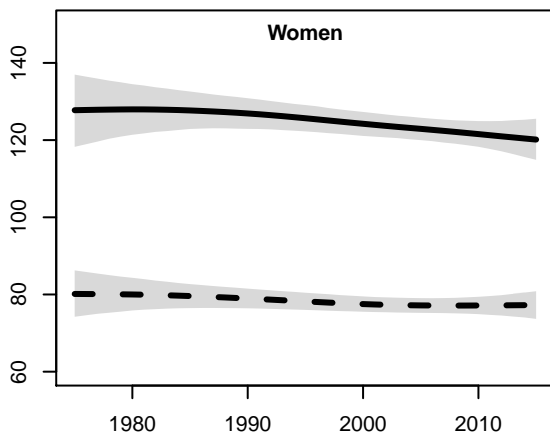

**Slovenia**  
Central Europe

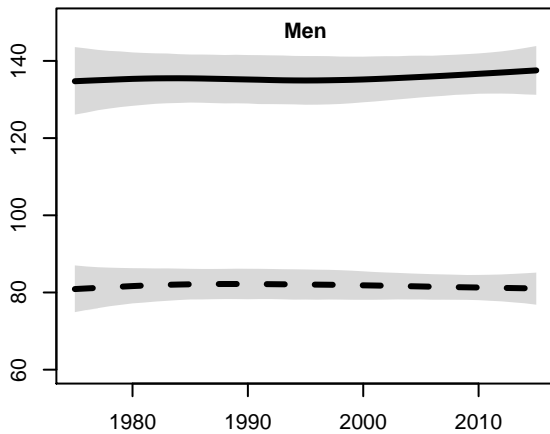

**Slovenia**  
Central Europe

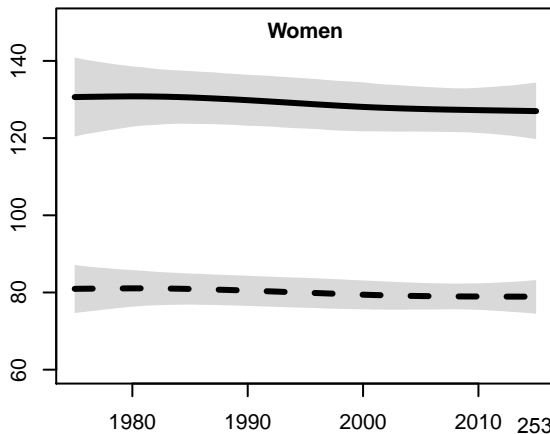

**Solomon Islands**

Melanesia

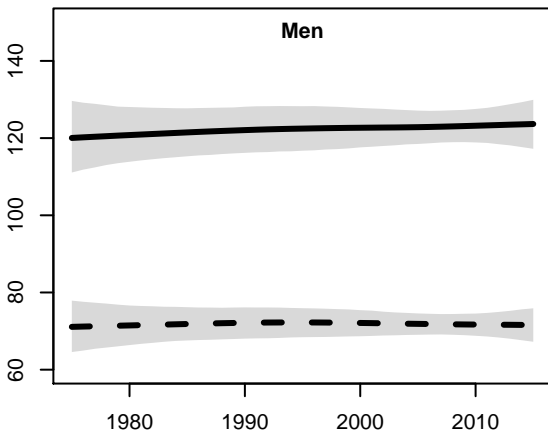**Solomon Islands**

Melanesia

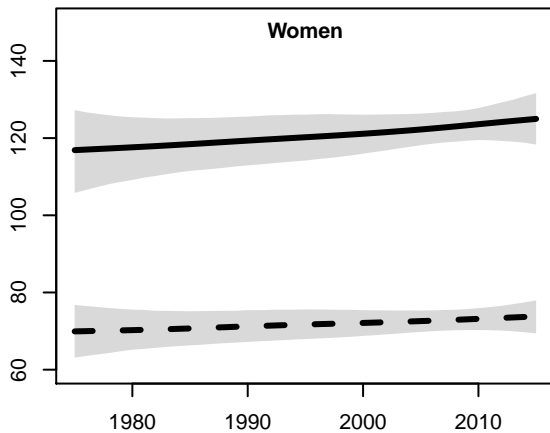**Somalia**

East Africa

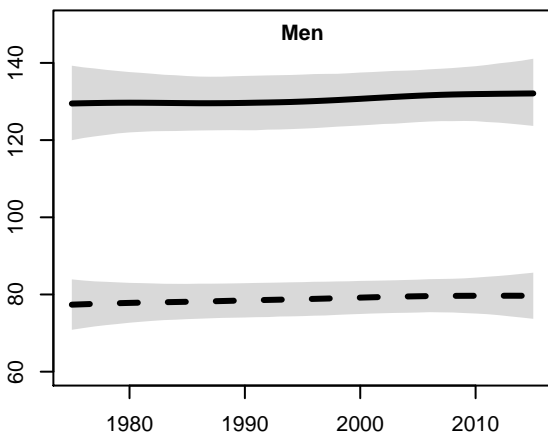**Somalia**

East Africa

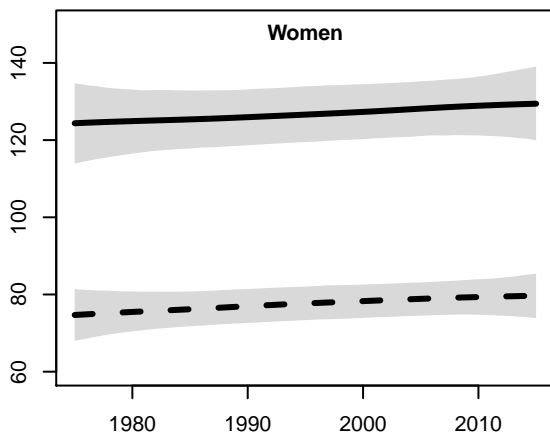**South Africa**

Southern Africa

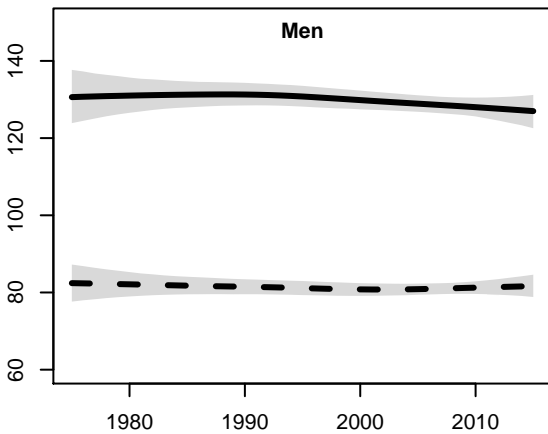**South Africa**

Southern Africa

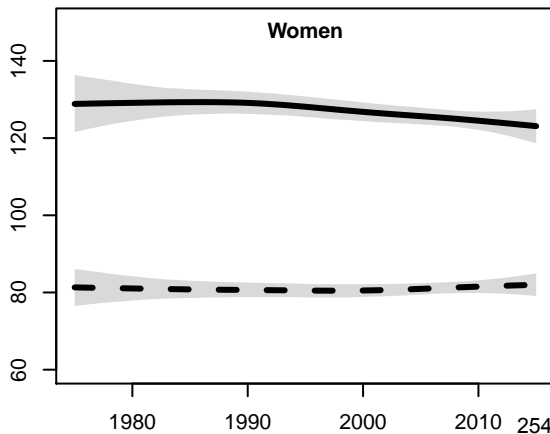

Age-standardised mean blood pressure (mmHg)



**South Korea**  
High-income Asia Pacific

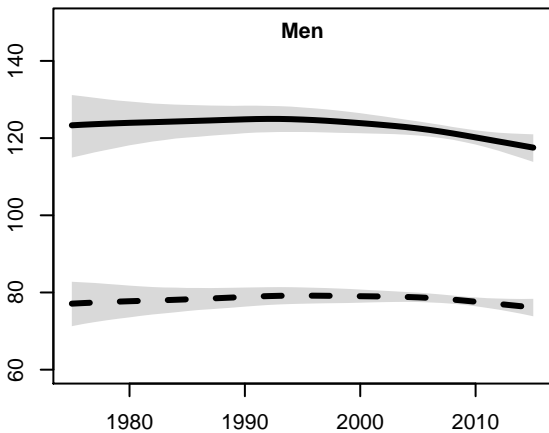

**South Korea**  
High-income Asia Pacific

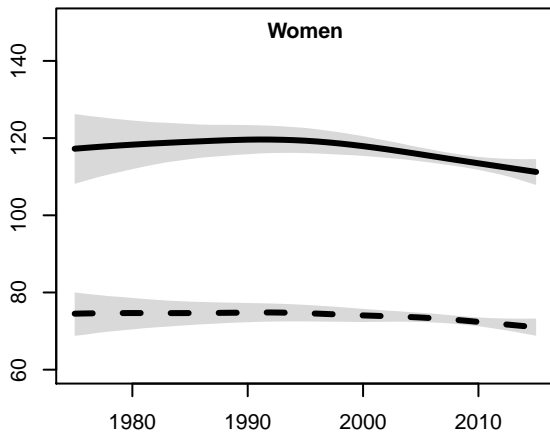

**Spain**  
South Western Europe

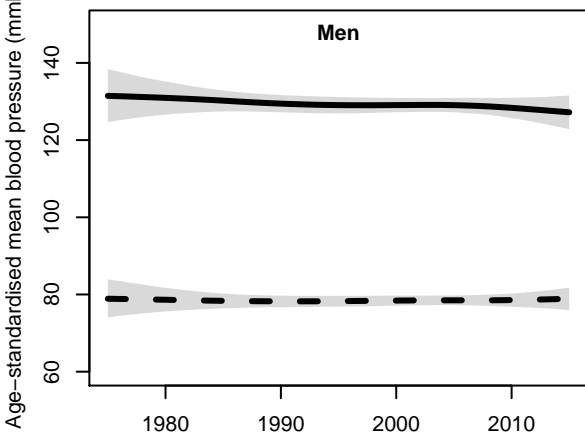

**Spain**  
South Western Europe

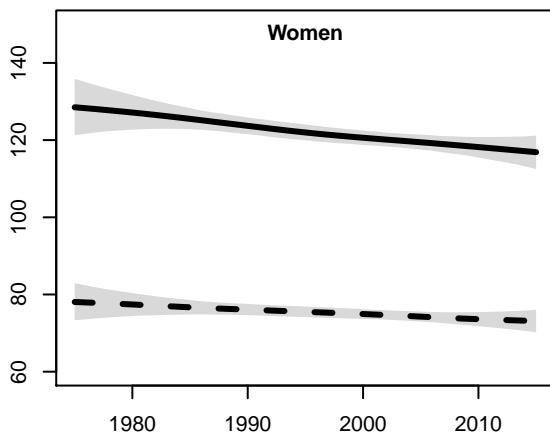

**Sri Lanka**  
Southeast Asia

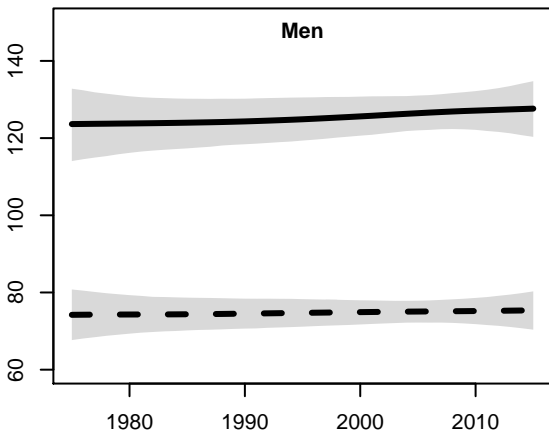

**Sri Lanka**  
Southeast Asia

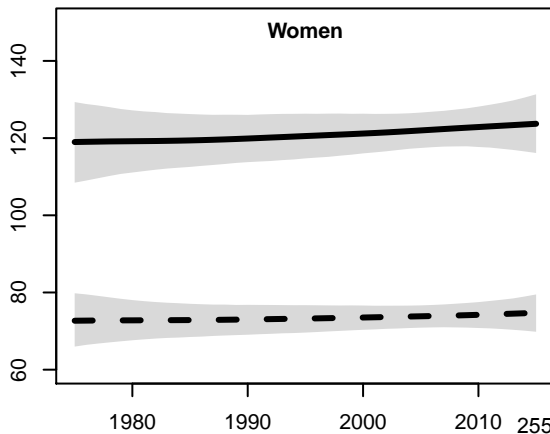

**Sudan**  
East Africa

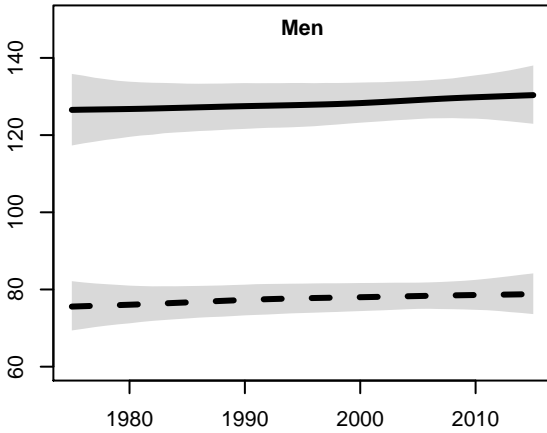

**Sudan**  
East Africa

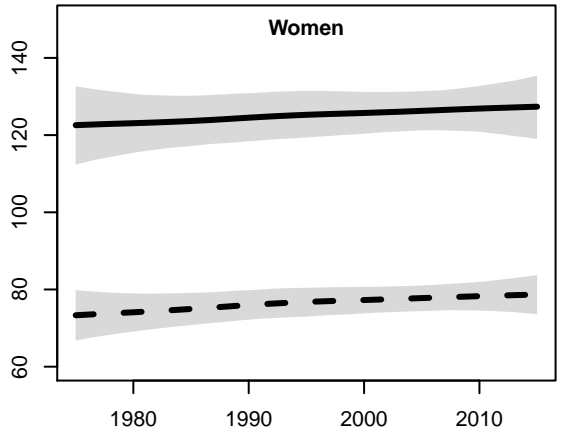

**Suriname**  
Caribbean

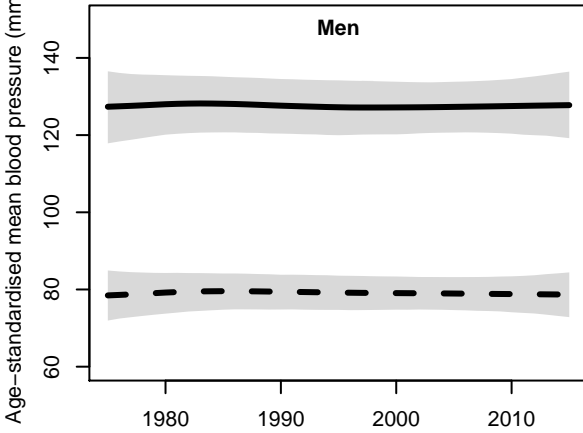

**Suriname**  
Caribbean

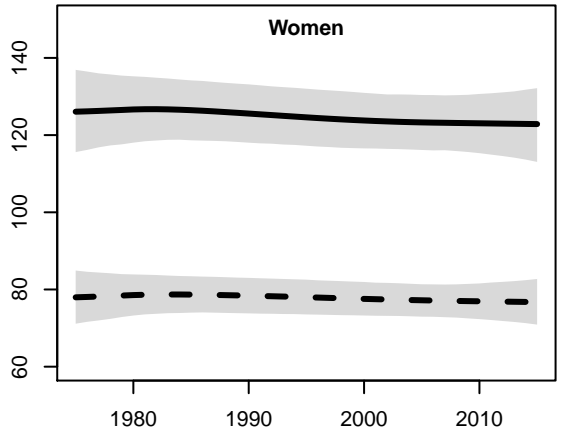

**Swaziland**  
Southern Africa

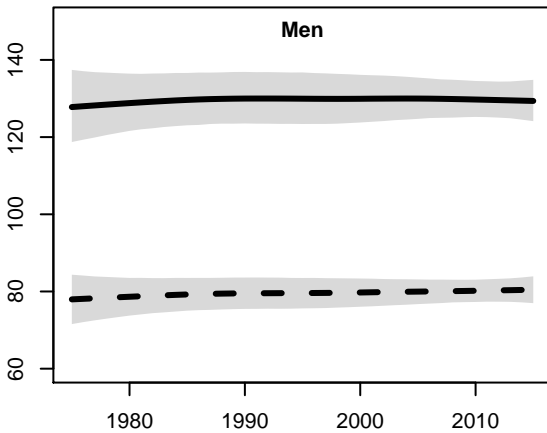

**Swaziland**  
Southern Africa

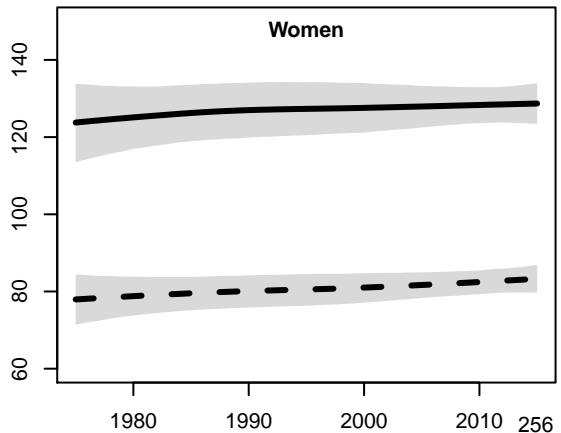

**Sweden**  
North Western Europe

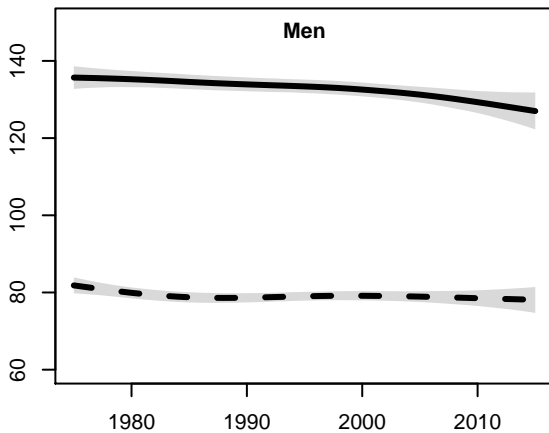

**Sweden**  
North Western Europe

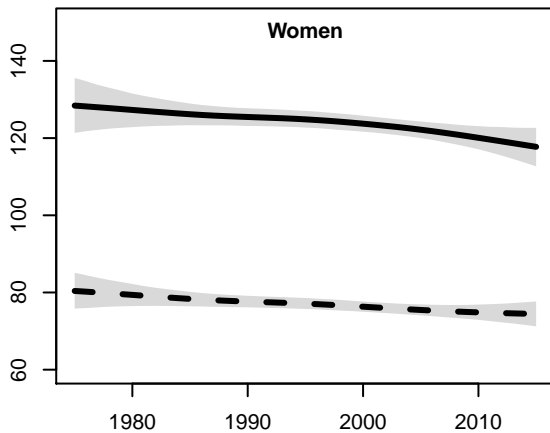

**Switzerland**  
North Western Europe

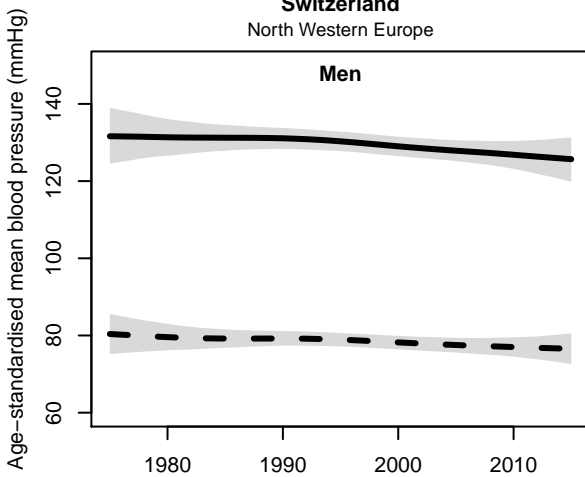

**Switzerland**  
North Western Europe

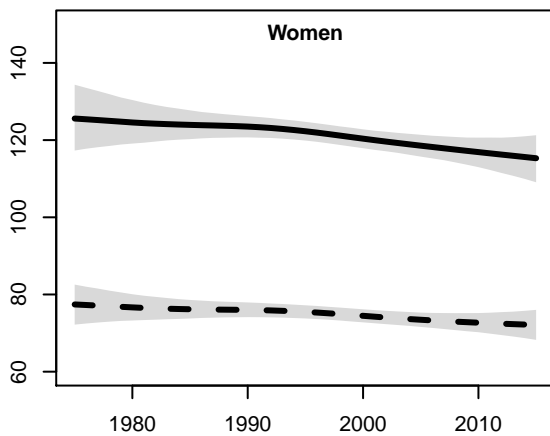

**Syrian Arab Republic**  
Middle East and North Africa

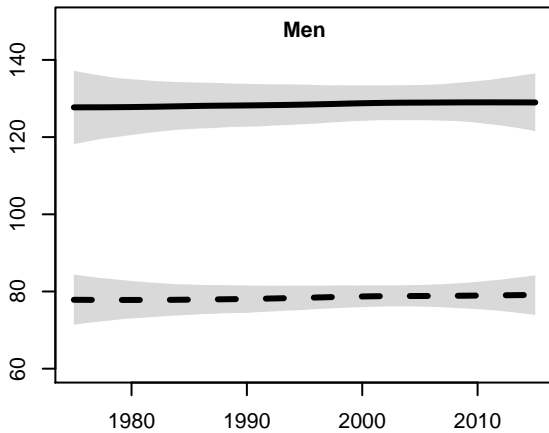

**Syrian Arab Republic**  
Middle East and North Africa

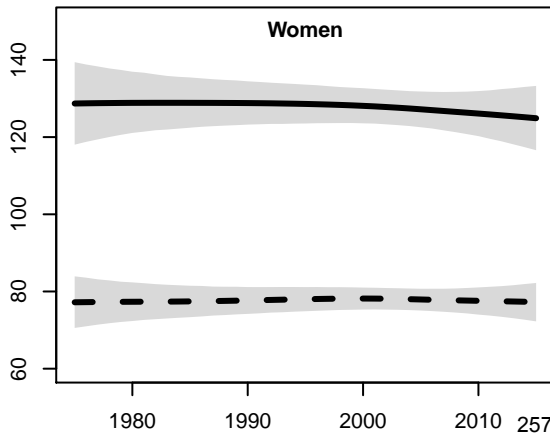

**Taiwan**  
East Asia

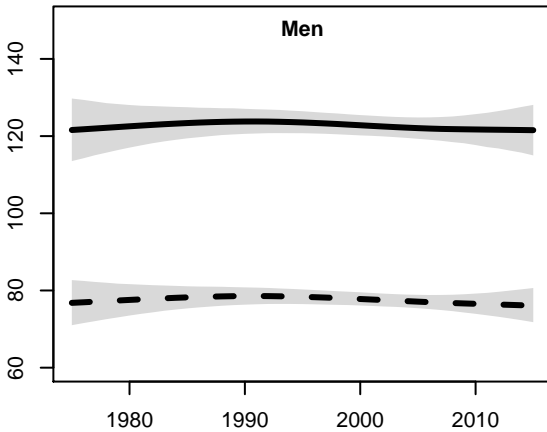

**Taiwan**  
East Asia

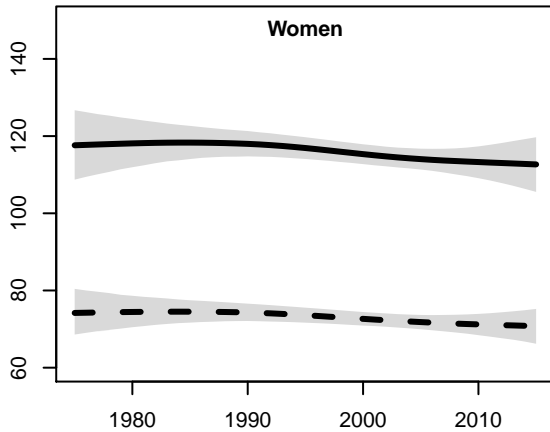

**Tajikistan**  
Central Asia

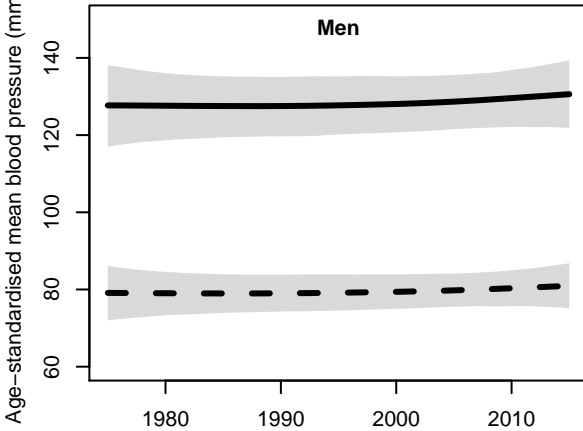

**Tajikistan**  
Central Asia

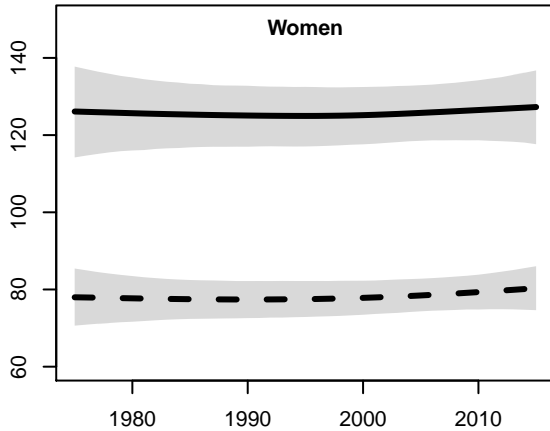

**Tanzania**  
East Africa

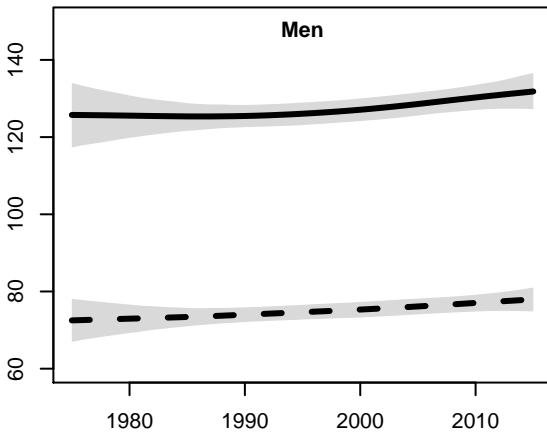

**Tanzania**  
East Africa

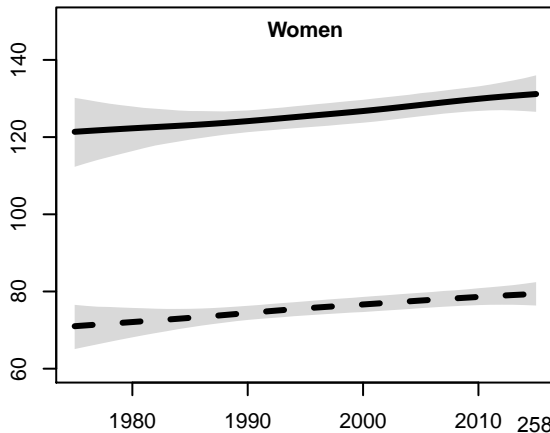

**Thailand**  
Southeast Asia

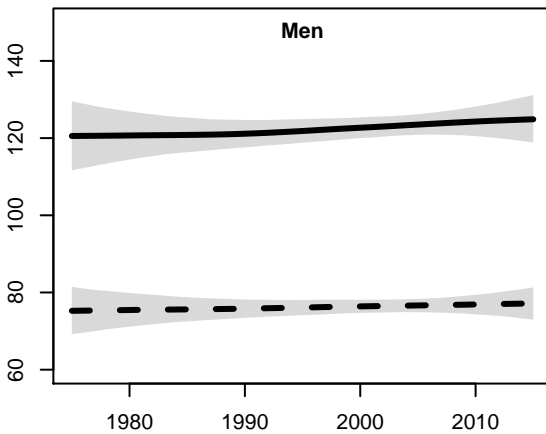

**Thailand**  
Southeast Asia

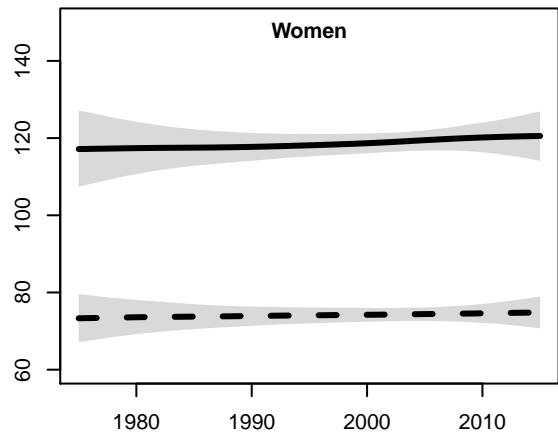

**Timor-Leste**  
Southeast Asia

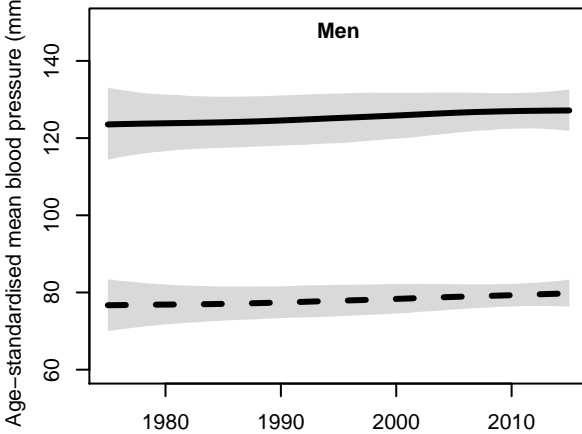

**Timor-Leste**  
Southeast Asia

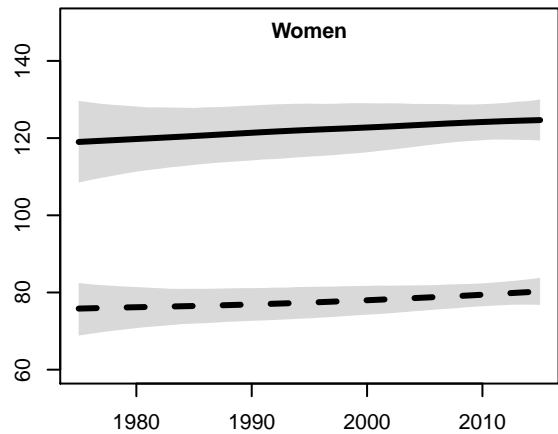

**Togo**  
West Africa

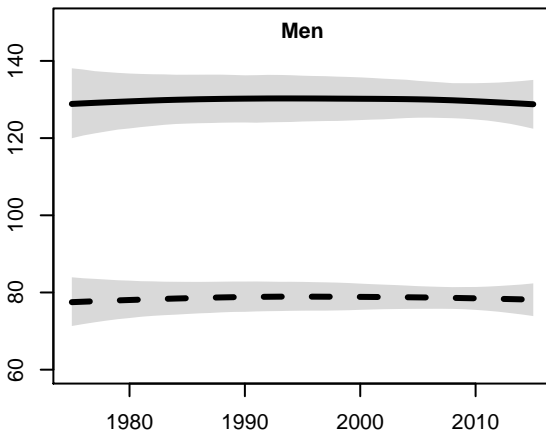

**Togo**  
West Africa

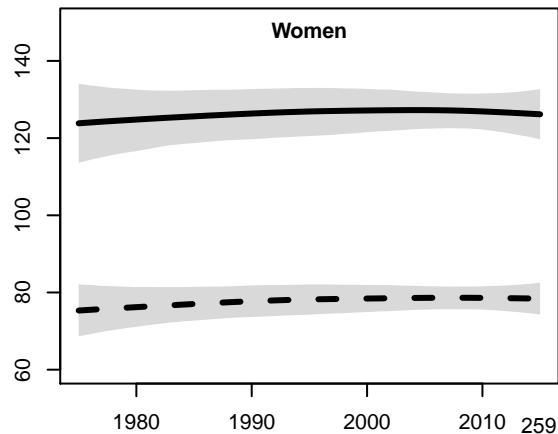

**Tokelau**

Polynesia and Micronesia

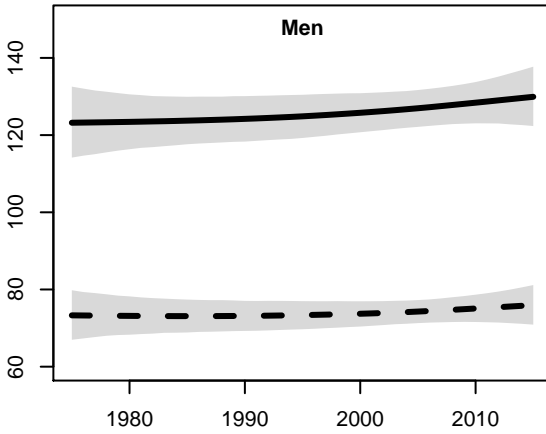**Tokelau**

Polynesia and Micronesia

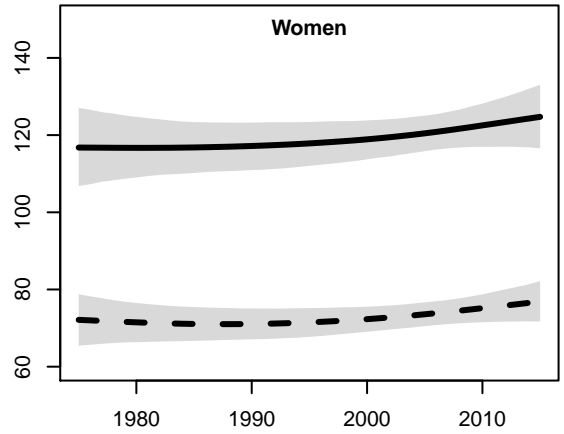**Tonga**

Polynesia and Micronesia

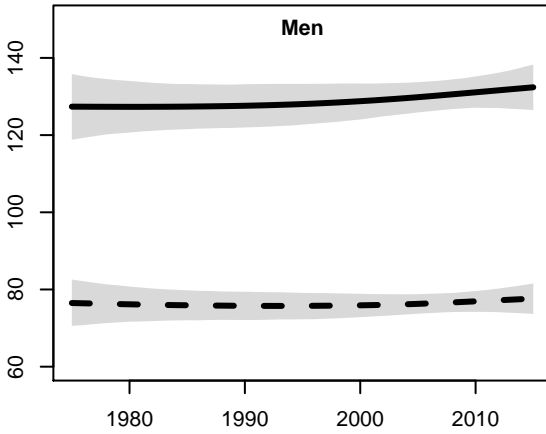**Tonga**

Polynesia and Micronesia

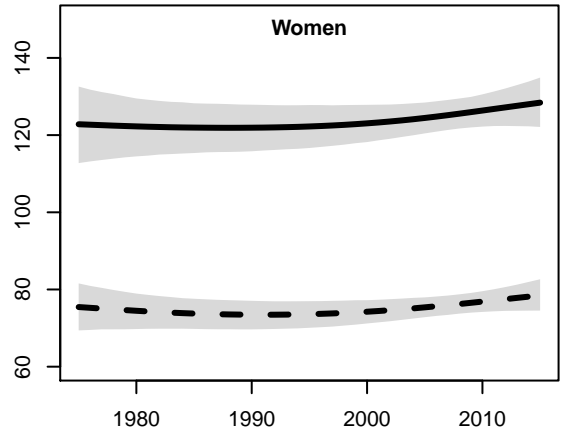**Trinidad and Tobago**

Caribbean

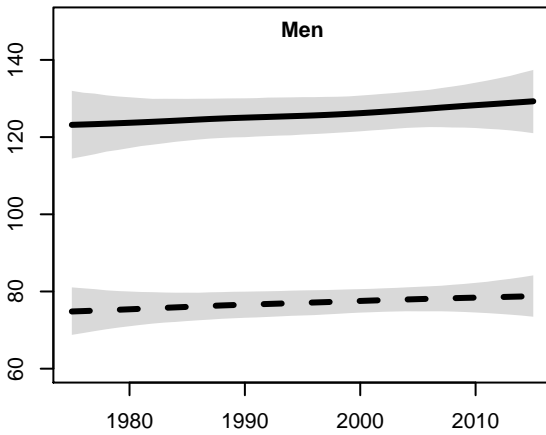**Trinidad and Tobago**

Caribbean

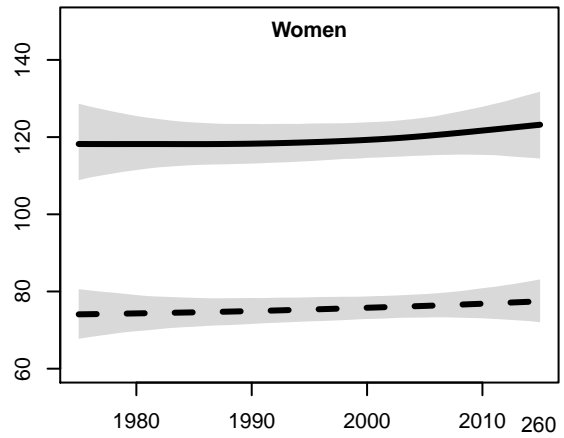

**Tunisia**  
Middle East and North Africa

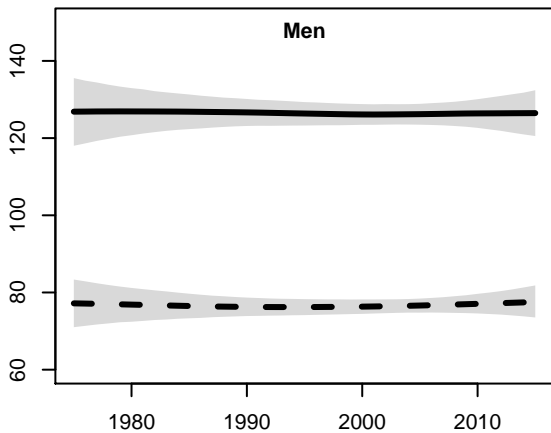

**Tunisia**  
Middle East and North Africa

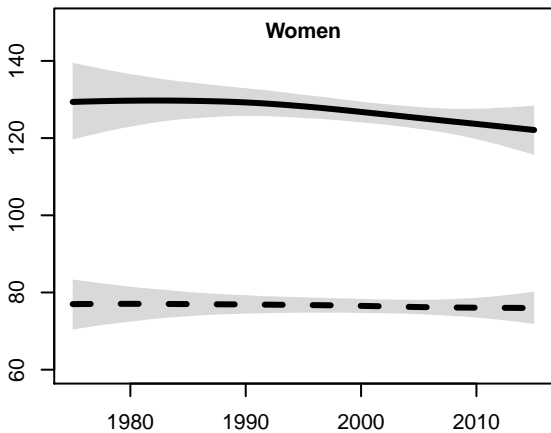

**Turkey**  
Middle East and North Africa

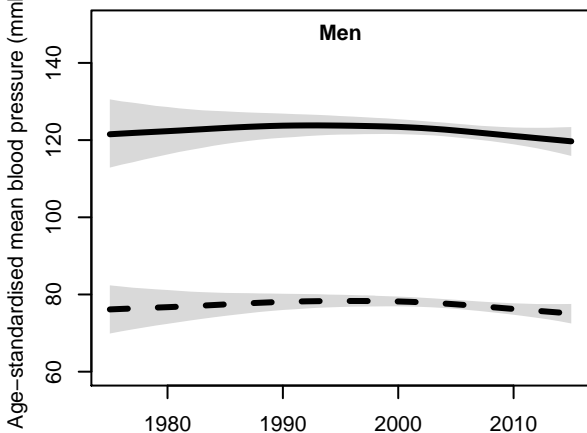

**Turkey**  
Middle East and North Africa

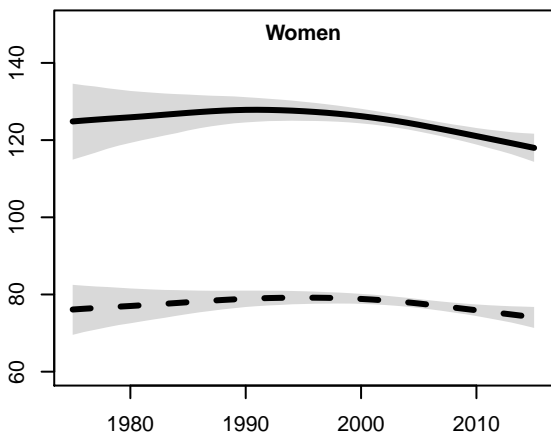

**Turkmenistan**  
Central Asia

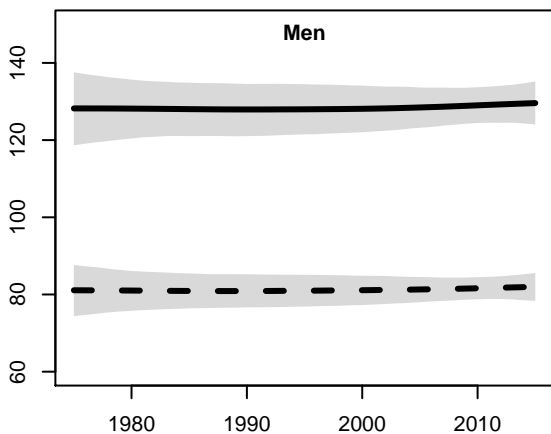

**Turkmenistan**  
Central Asia

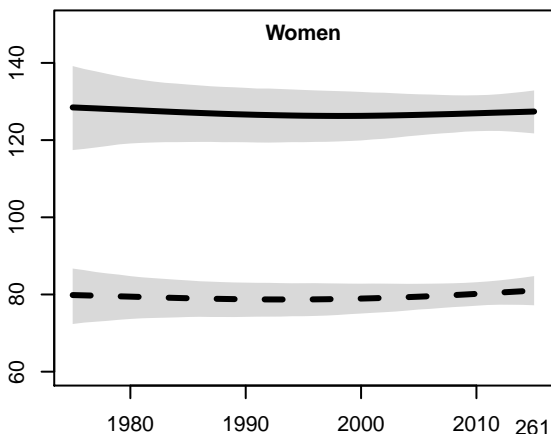

### Tuvalu

Polynesia and Micronesia

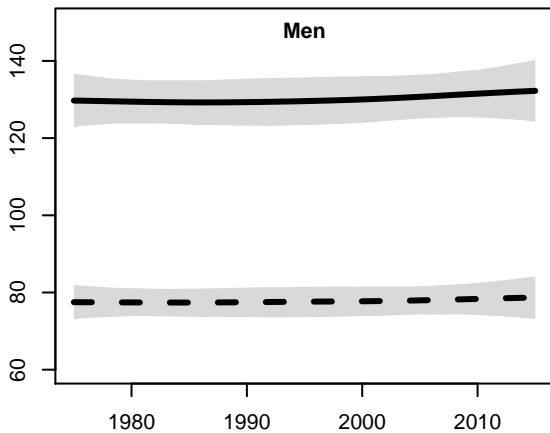

### Tuvalu

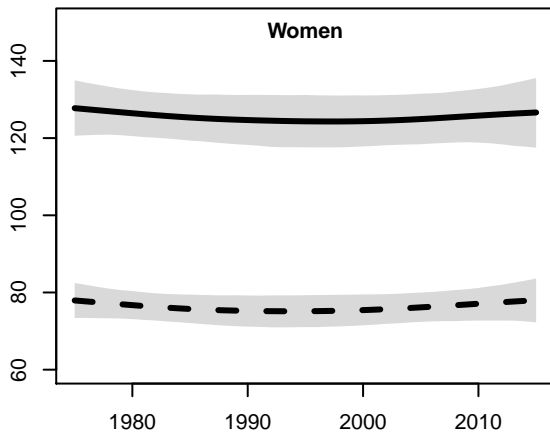

### Uganda

East Africa

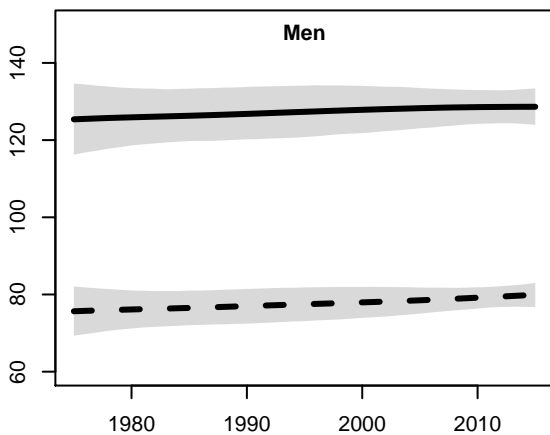

### Uganda

East Africa

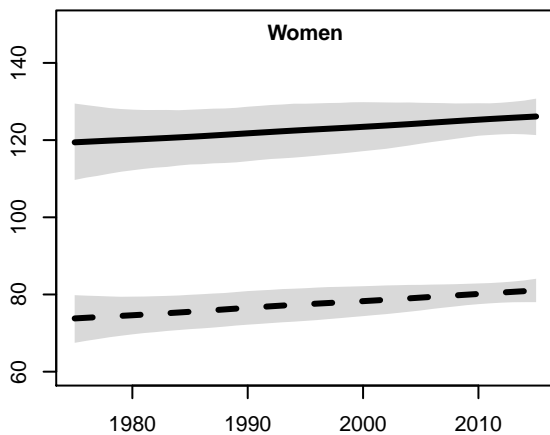

### Ukraine

Eastern Europe

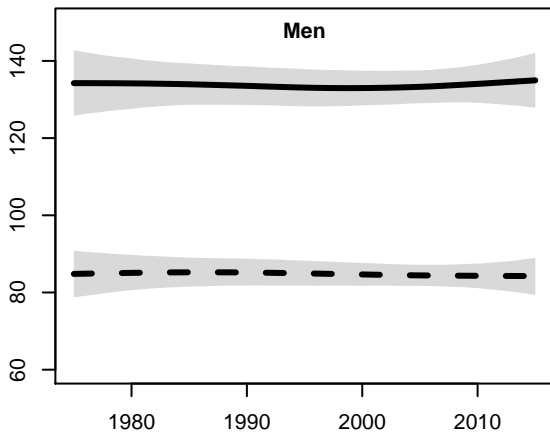

### Ukraine

Eastern Europe

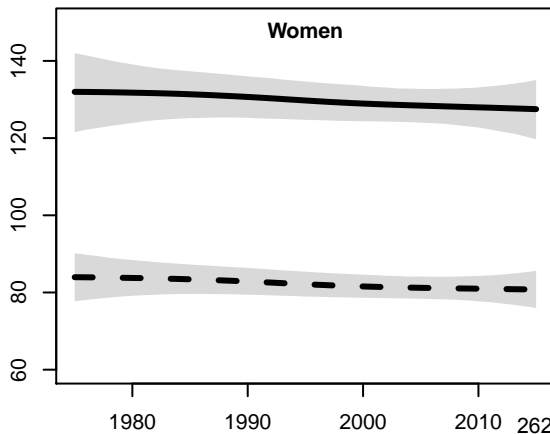



**United Arab Emirates**  
Middle East and North Africa

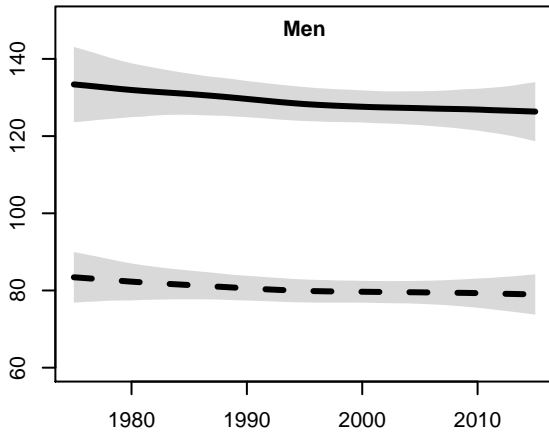

**United Arab Emirates**  
Middle East and North Africa

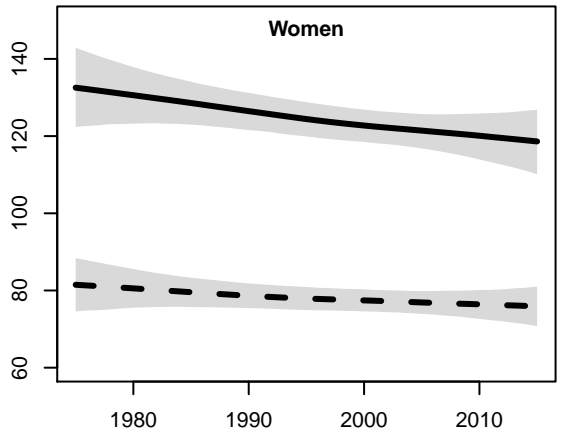

**United Kingdom**  
High-income English-speaking countries

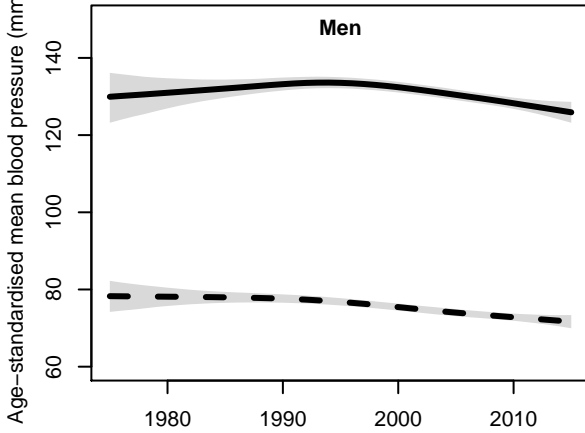

**United Kingdom**  
High-income English-speaking countries

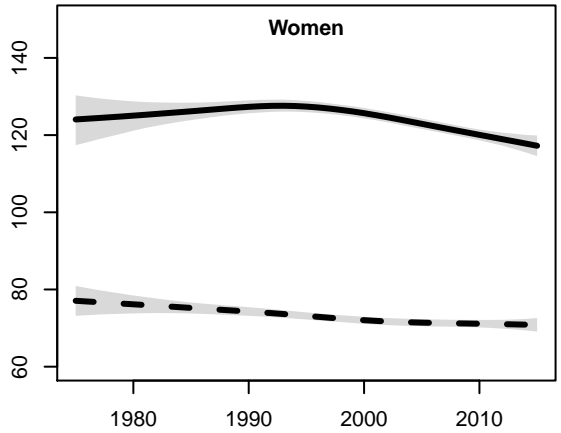

**United States of America**  
High-income English-speaking countries

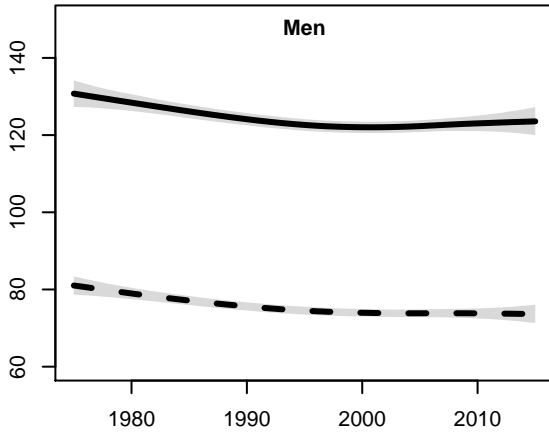

**United States of America**  
High-income English-speaking countries

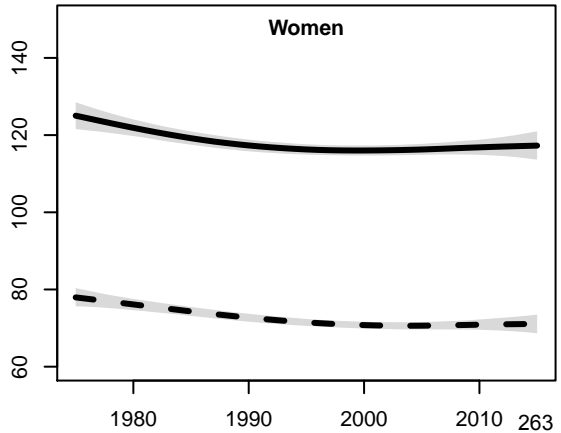

**Uruguay**  
Southern and Tropical Latin America

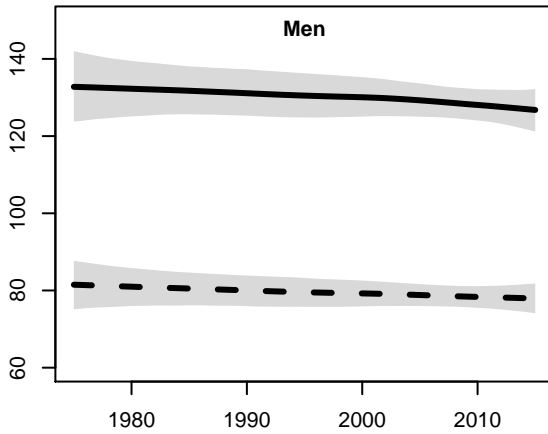

**Uruguay**  
Southern and Tropical Latin America

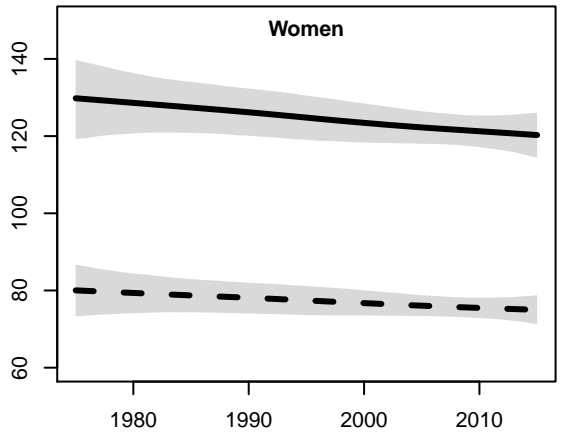

**Uzbekistan**  
Central Asia

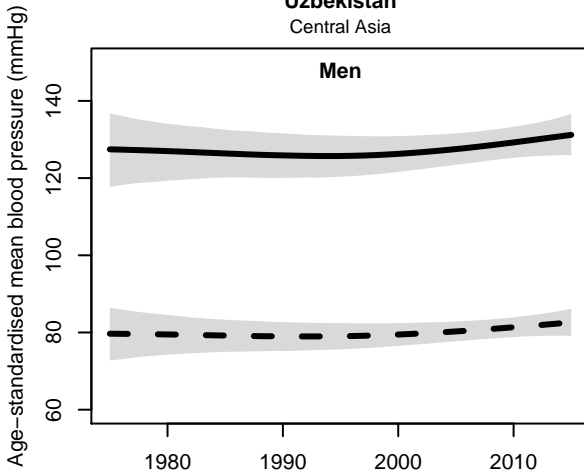

**Uzbekistan**  
Central Asia

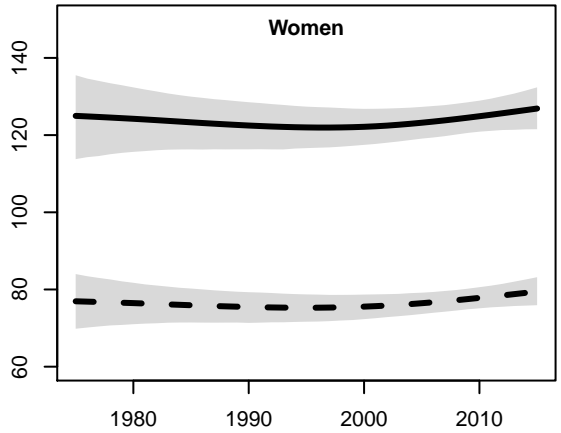

**Vanuatu**  
Melanesia

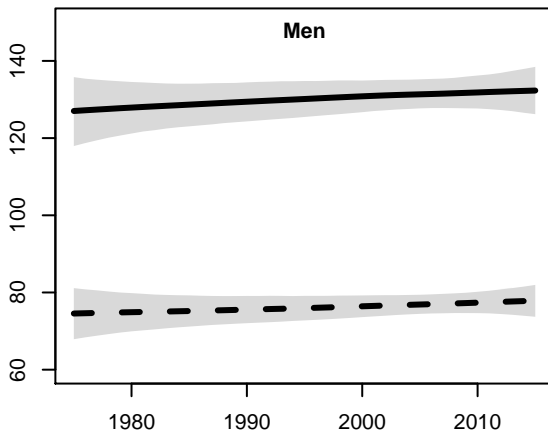

**Vanuatu**  
Melanesia

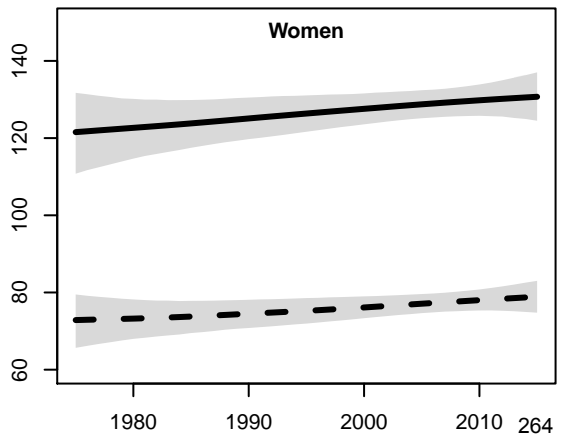

**Venezuela**  
Central Latin America

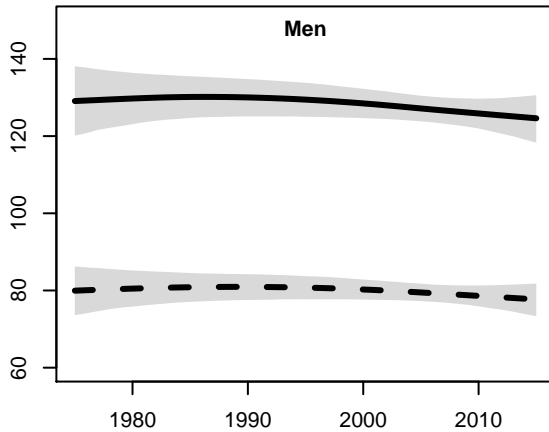

**Venezuela**  
Central Latin America

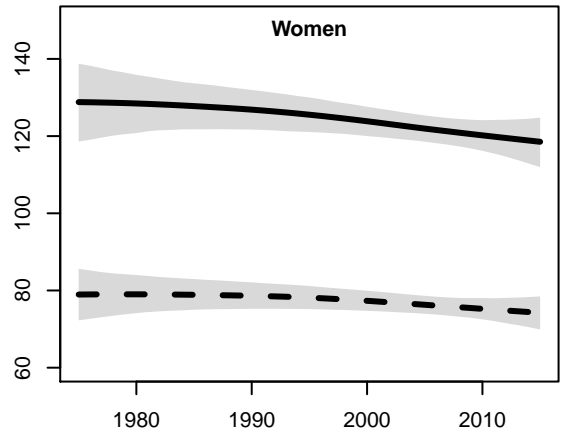

**Viet Nam**  
Southeast Asia

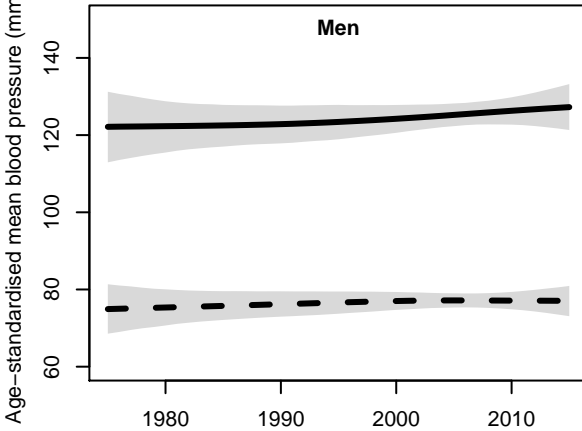

**Viet Nam**  
Southeast Asia

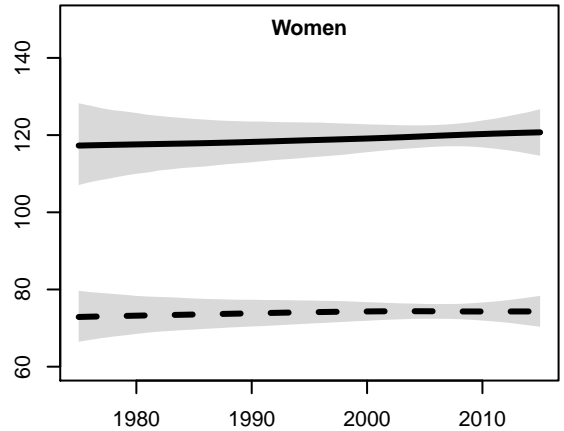

**Yemen**  
Middle East and North Africa

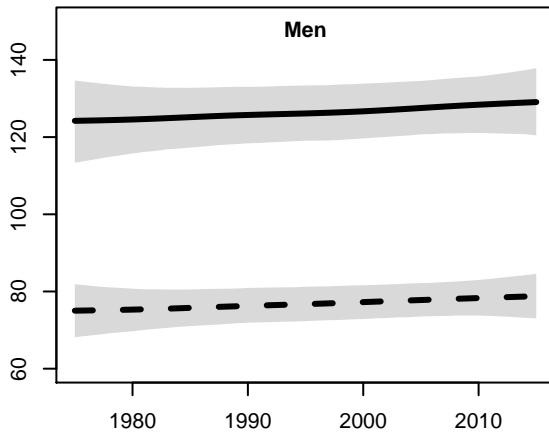

**Yemen**  
Middle East and North Africa

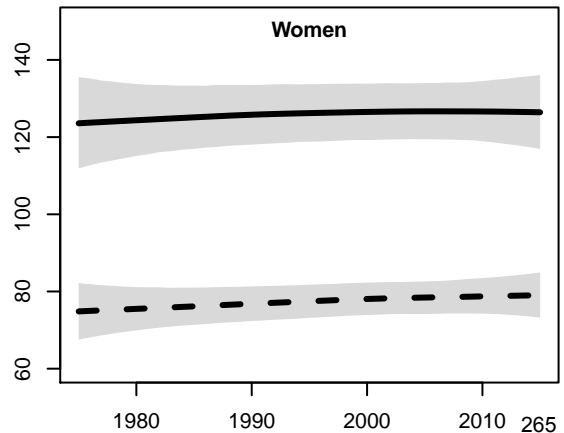

**Zambia**  
East Africa

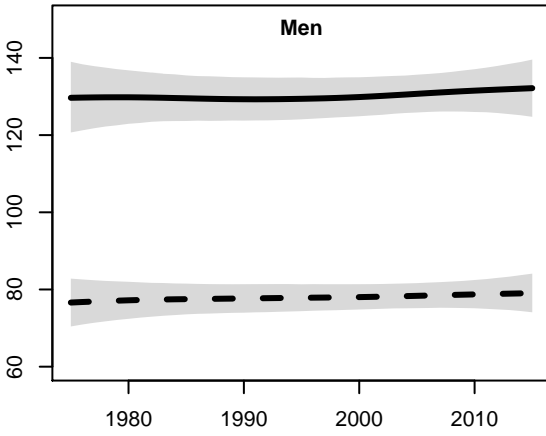

**Zambia**  
East Africa

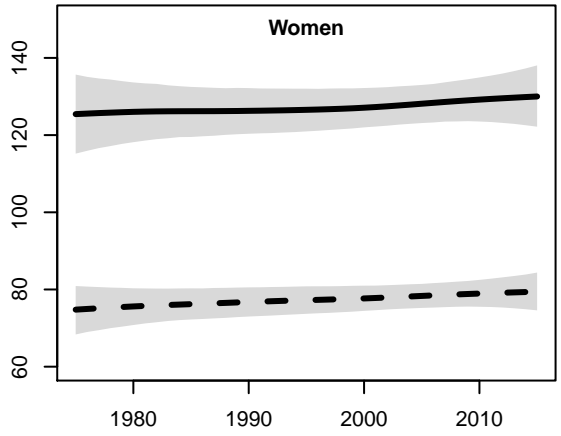

**Zimbabwe**  
Southern Africa

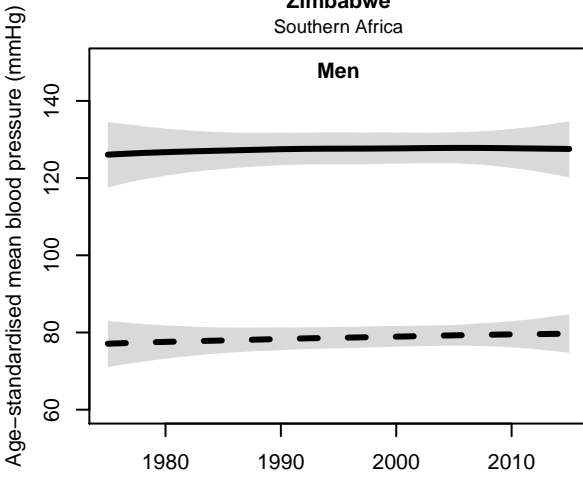

**Zimbabwe**  
Southern Africa

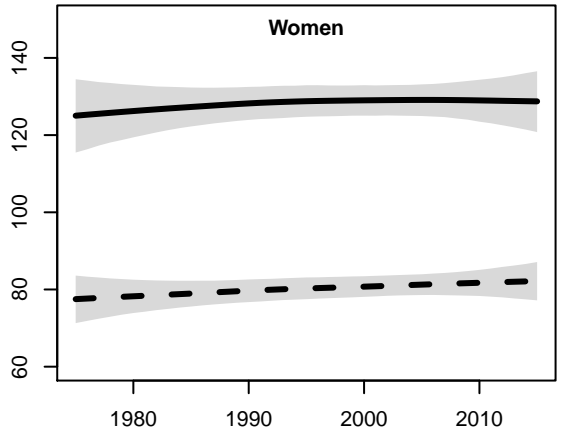

**Appendix Figure 6:** Trends in age-standardised and crude prevalence of raised blood pressure by sex and country in people aged 18 years and older. The lines show the posterior mean and the shaded area shows the 95% credible interval for age-standardised prevalence.

**Afghanistan**

South Asia

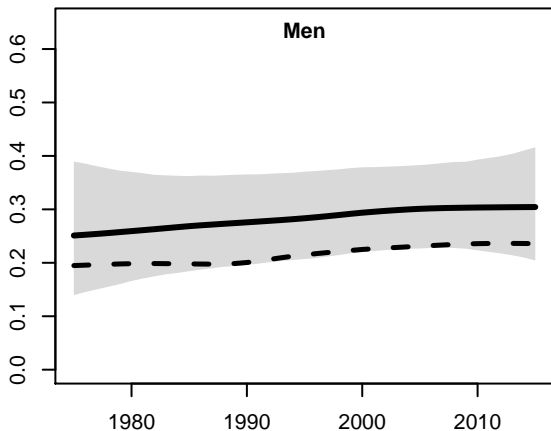**Afghanistan**

South Asia

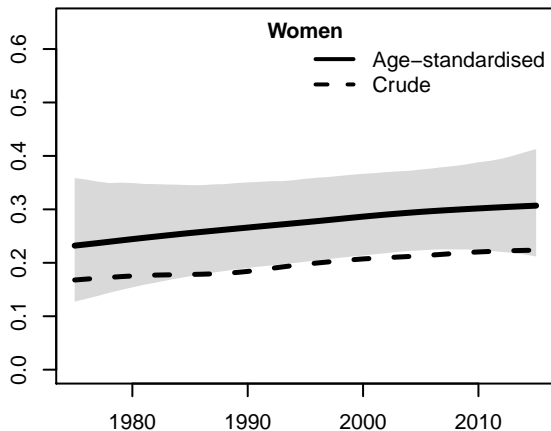**Albania**

Central Europe

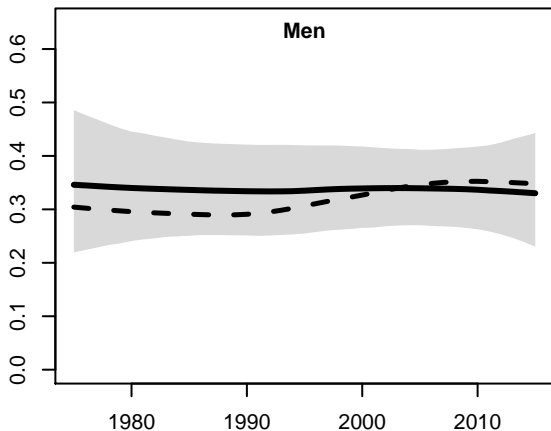**Albania**

Central Europe

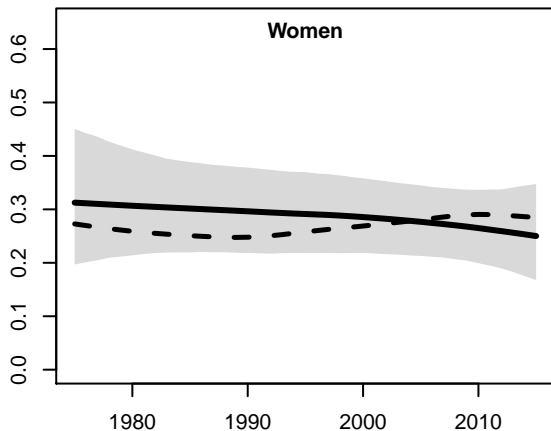**Algeria**

Middle East and North Africa

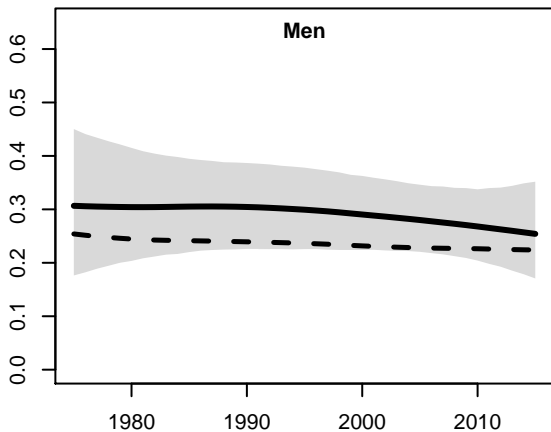**Algeria**

Middle East and North Africa

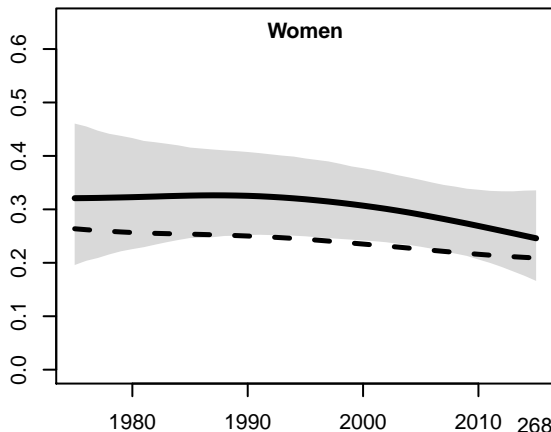

Age-standardised/Crude adult prevalence of raised blood pressure

**American Samoa**  
Polynesia and Micronesia

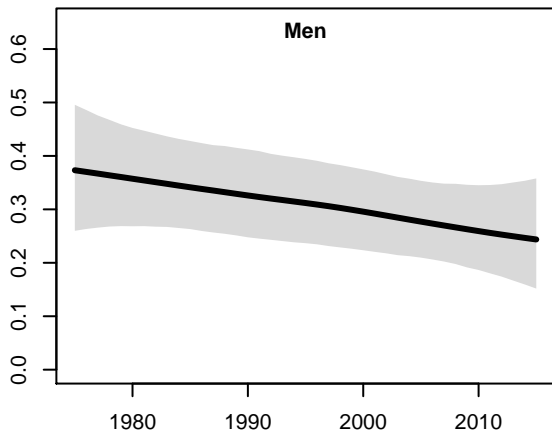

**American Samoa**  
Polynesia and Micronesia

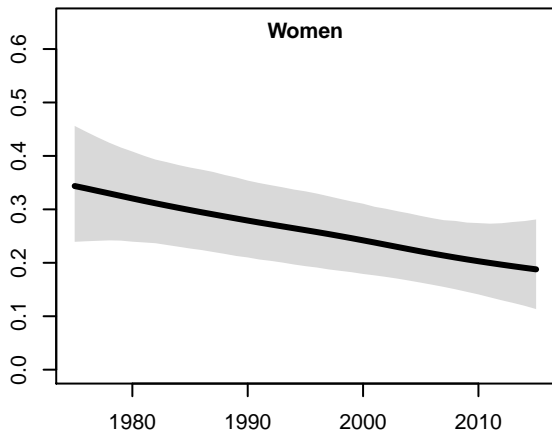

**Andorra**  
South Western Europe

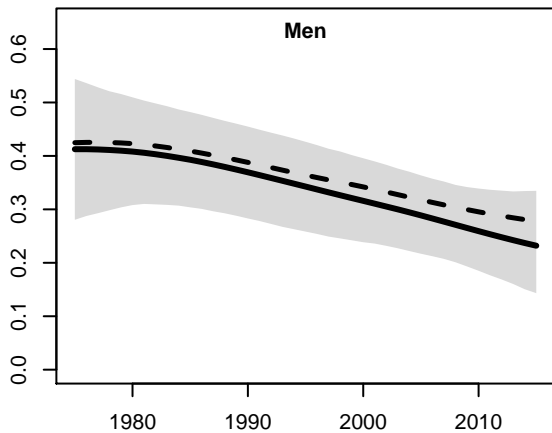

**Andorra**  
South Western Europe

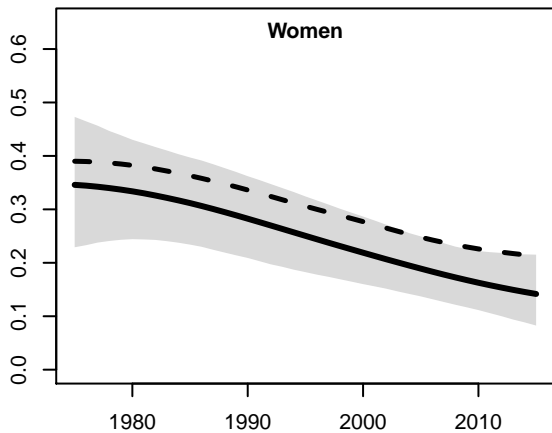

**Angola**  
Central Africa

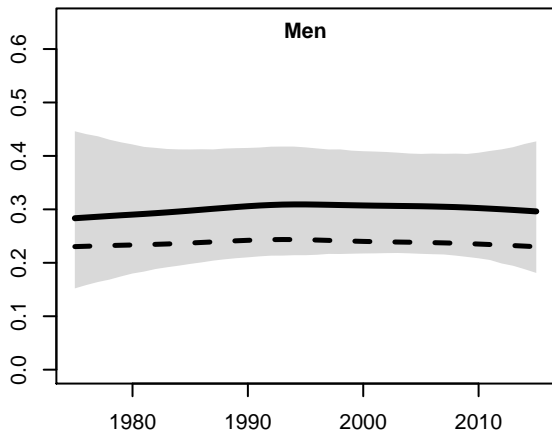

**Angola**  
Central Africa

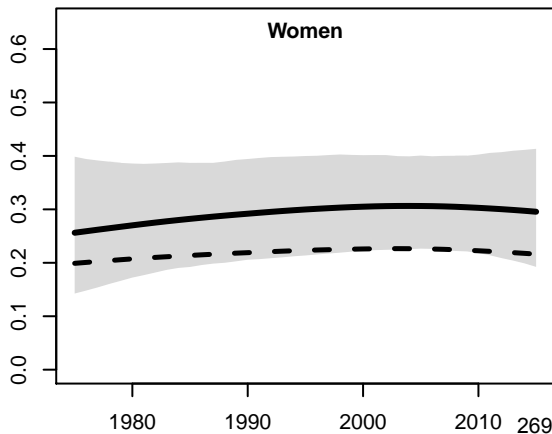

Age-standardised/Crude adult prevalence of raised blood pressure

### Antigua and Barbuda

Caribbean

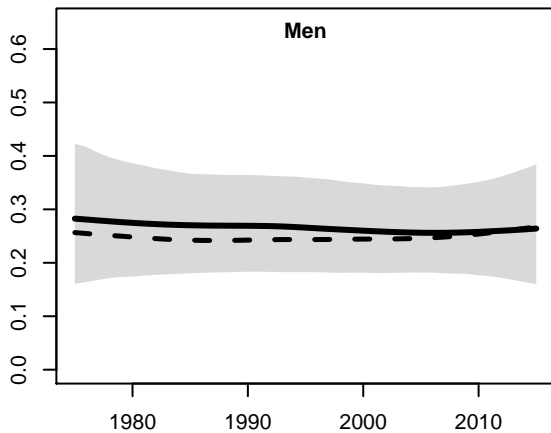

### Antigua and Barbuda

Caribbean

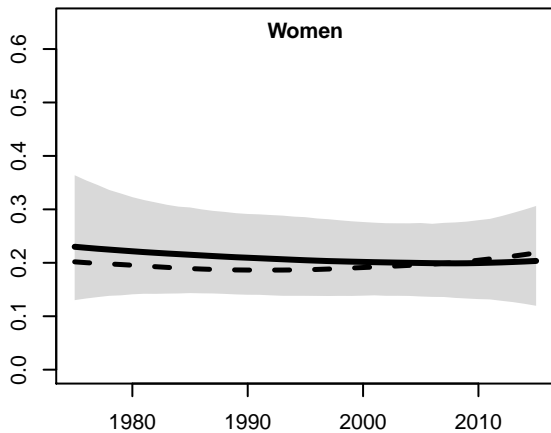

### Argentina

Southern and Tropical Latin America

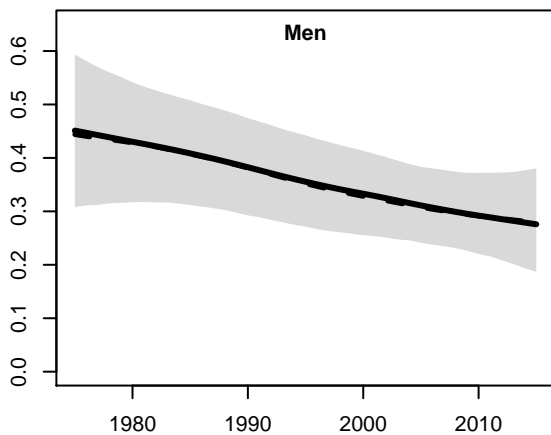

### Argentina

Southern and Tropical Latin America

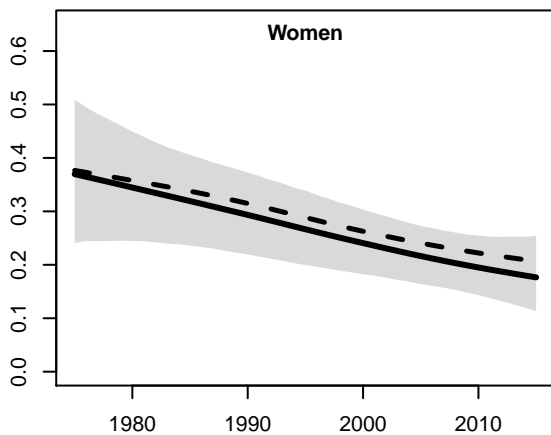

### Armenia

Central Asia

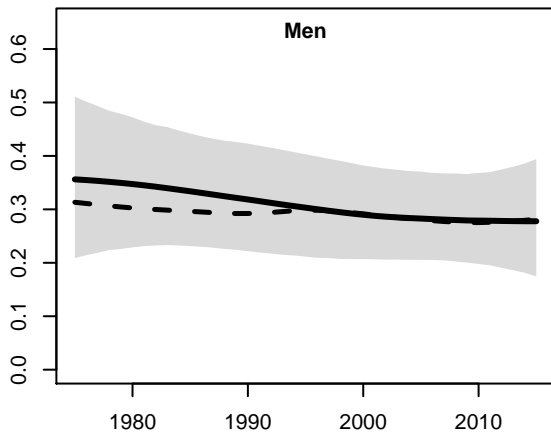

### Armenia

Central Asia

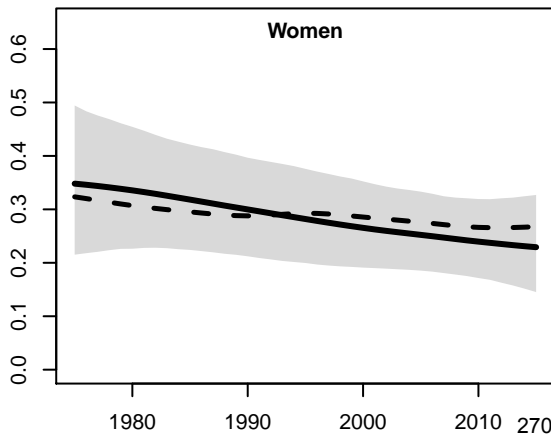

Age-standardised/Crude adult prevalence of raised blood pressure



**Australia**  
High-income English-speaking countries

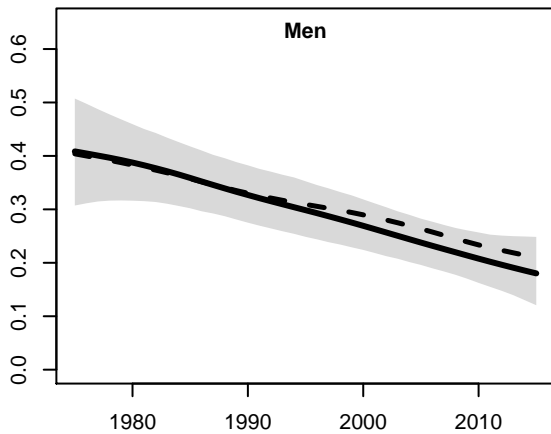

**Australia**  
High-income English-speaking countries

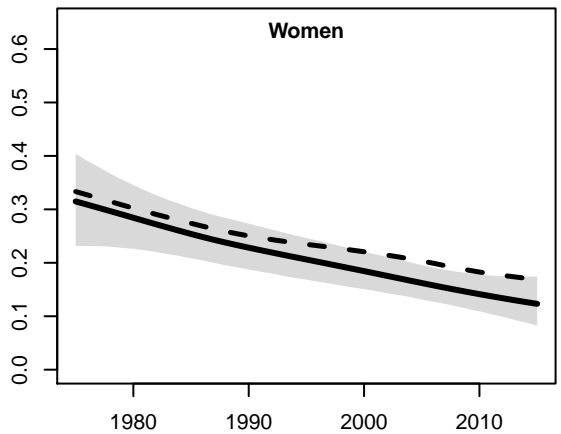

**Austria**  
North Western Europe

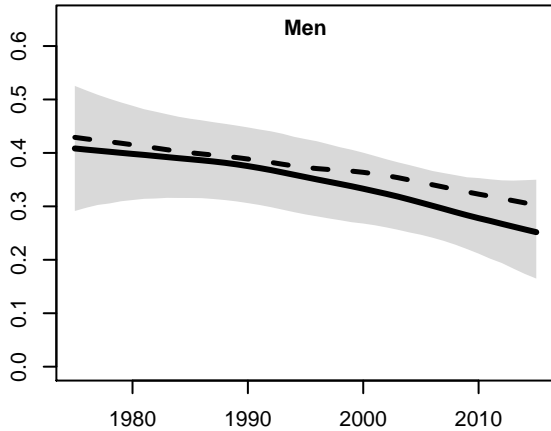

**Austria**  
North Western Europe

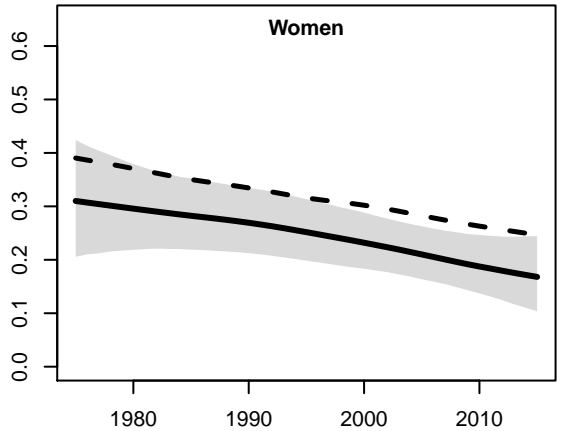

**Azerbaijan**  
Central Asia

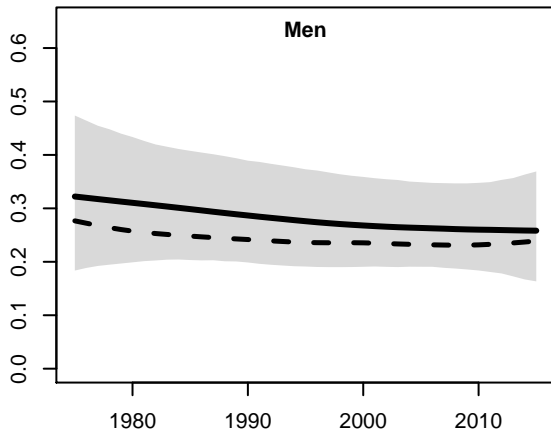

**Azerbaijan**  
Central Asia

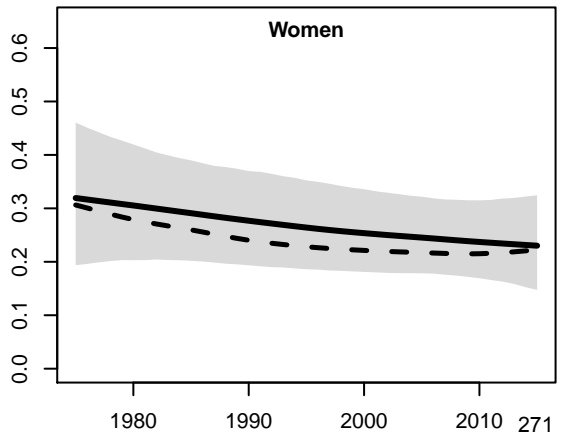

Age-standardised/Crude adult prevalence of raised blood pressure

**Bahamas**  
Caribbean

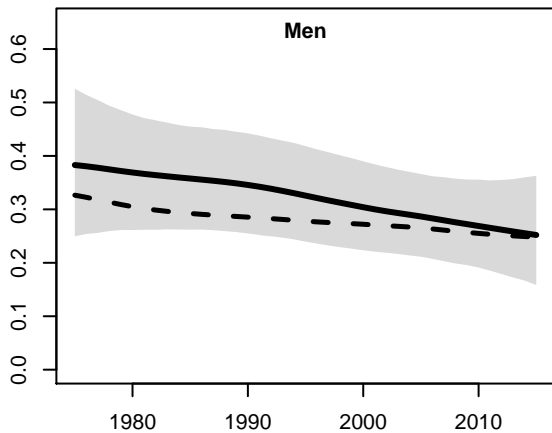

**Bahamas**  
Caribbean

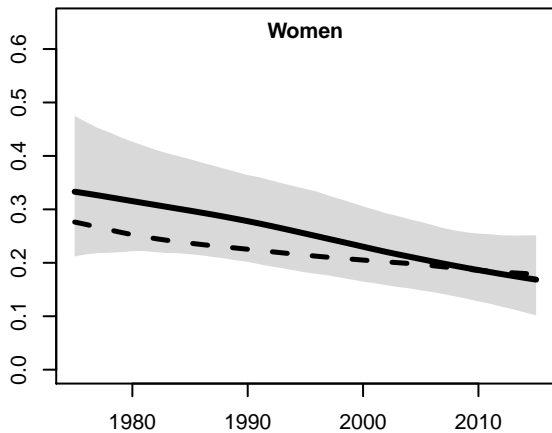

**Bahrain**  
Middle East and North Africa

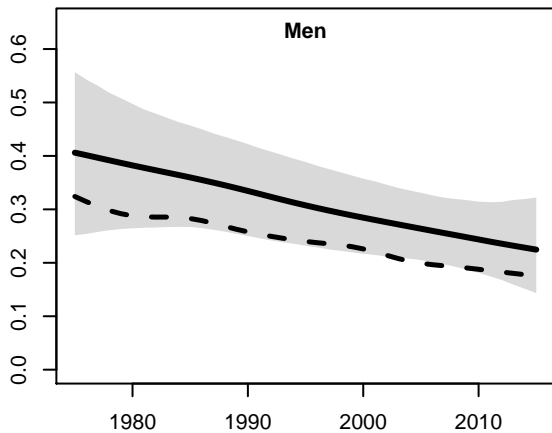

**Bahrain**  
Middle East and North Africa

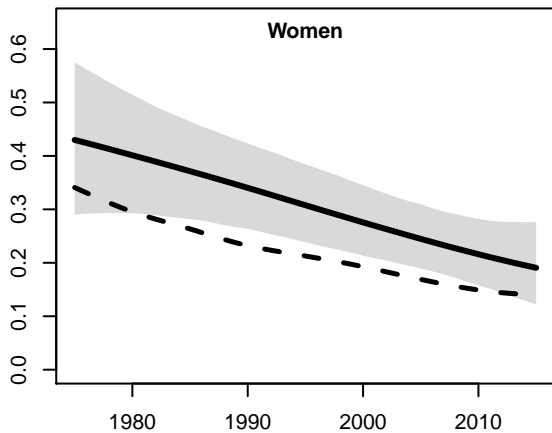

**Bangladesh**  
South Asia

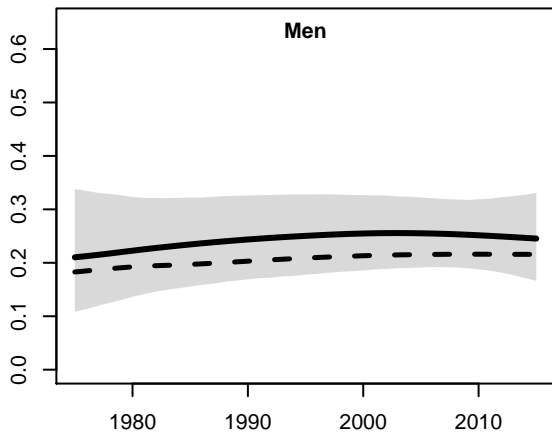

**Bangladesh**  
South Asia

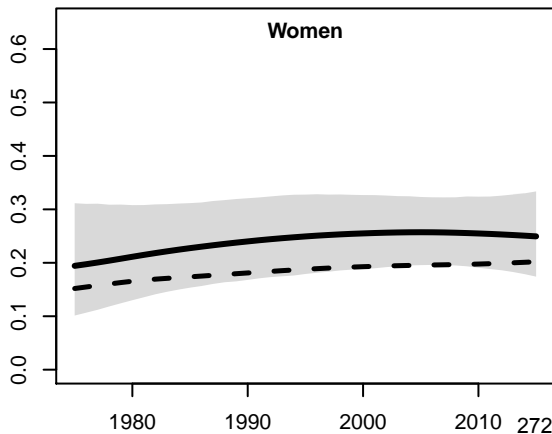

**Barbados**

Caribbean

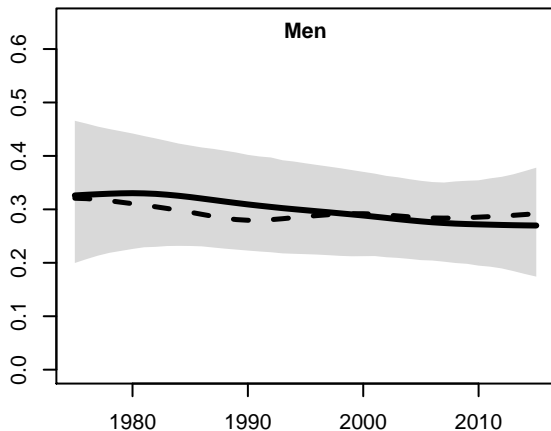**Barbados**

Caribbean

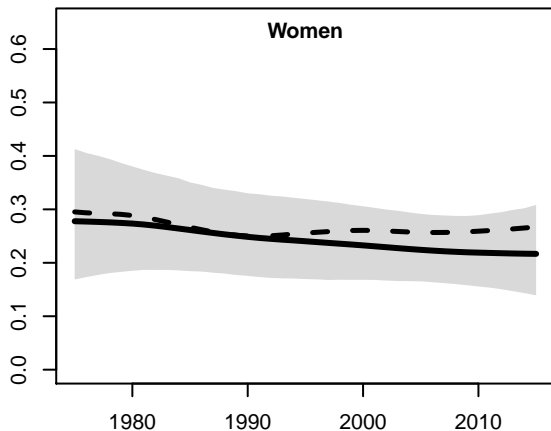**Belarus**

Eastern Europe

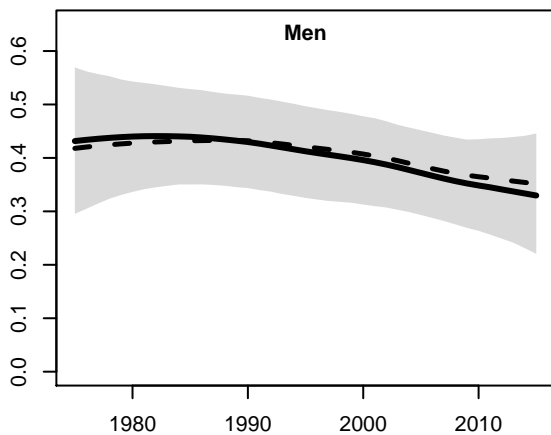**Belarus**

Eastern Europe

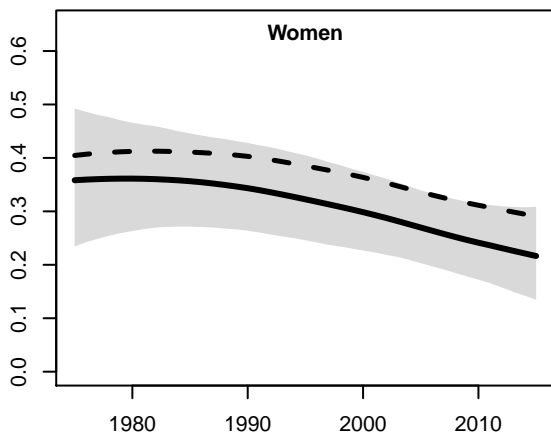**Belgium**

North Western Europe

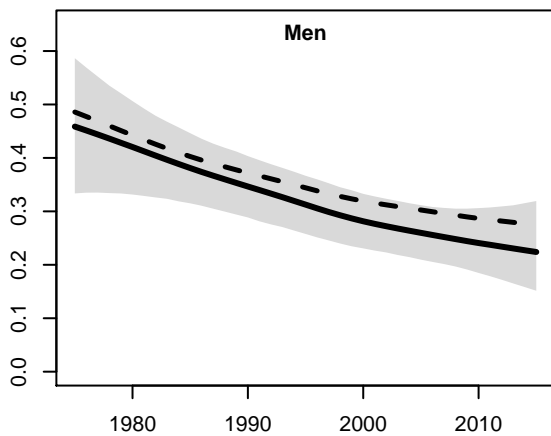**Belgium**

North Western Europe

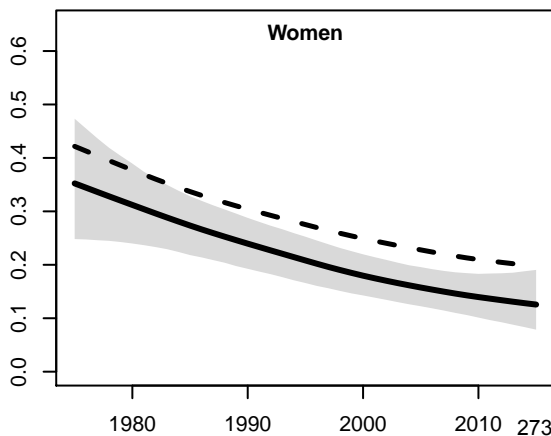

**Belize**  
Caribbean

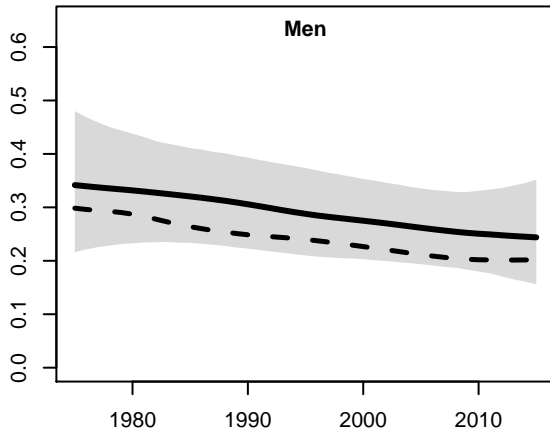

**Belize**  
Caribbean

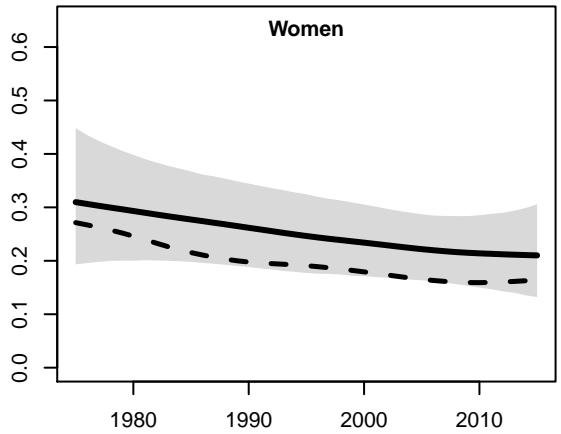

**Benin**  
West Africa

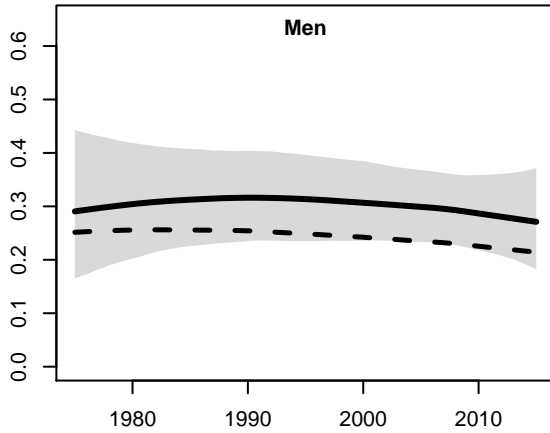

**Benin**  
West Africa

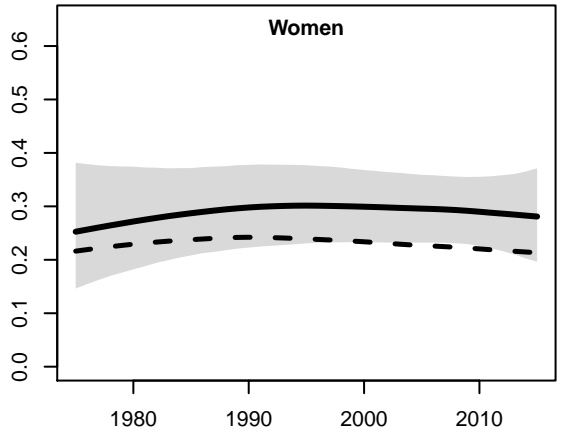

**Bermuda**  
Caribbean

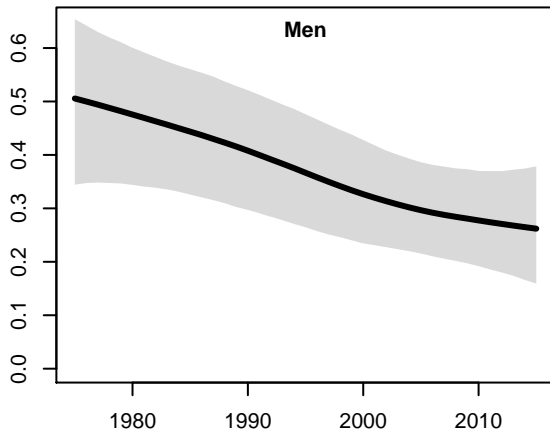

**Bermuda**  
Caribbean

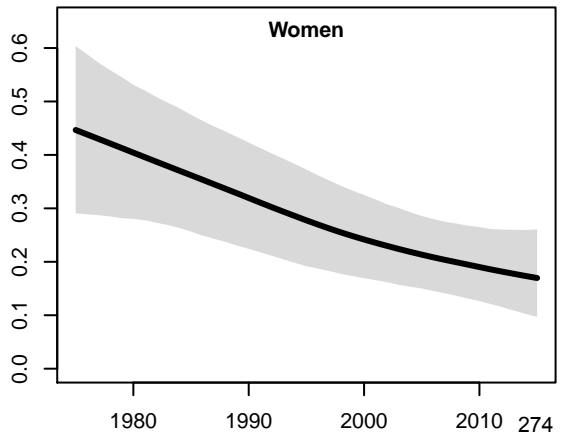

Age-standardised/Crude adult prevalence of raised blood pressure

**Bhutan**  
South Asia

**Bhutan**  
South Asia

**Men**

**Women**

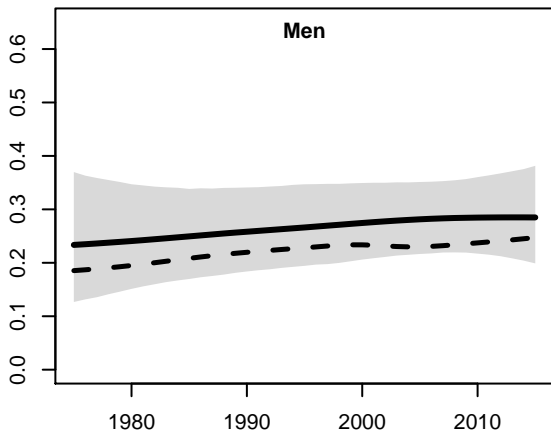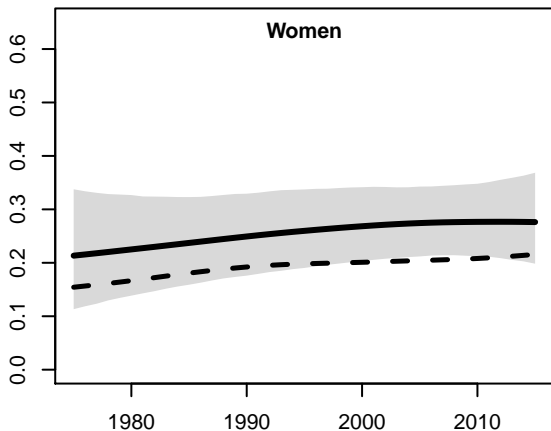

**Bolivia**  
Andean Latin America

**Bolivia**  
Andean Latin America

**Men**

**Women**

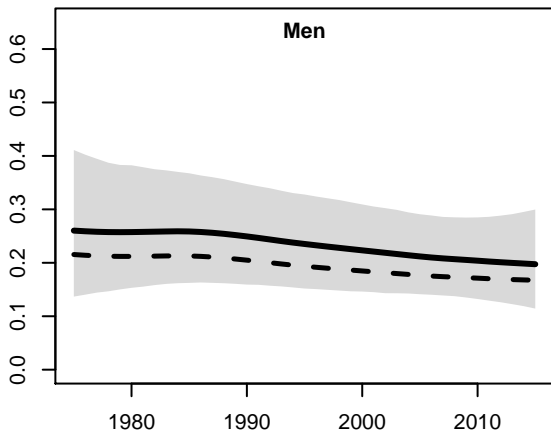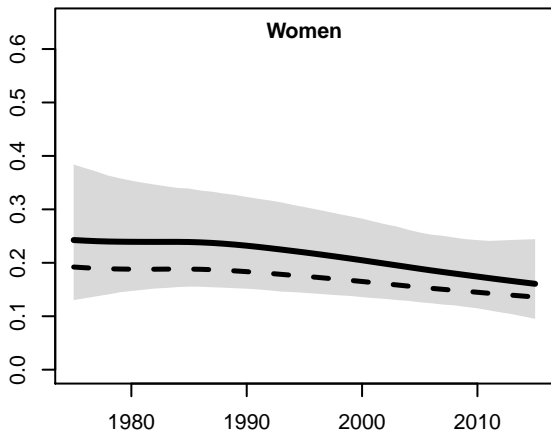

**Bosnia and Herzegovina**  
Central Europe

**Bosnia and Herzegovina**  
Central Europe

**Men**

**Women**

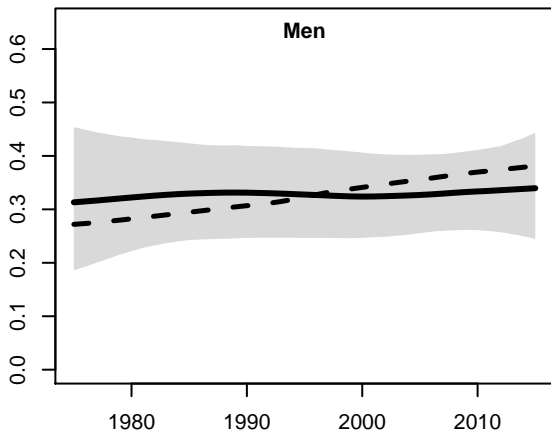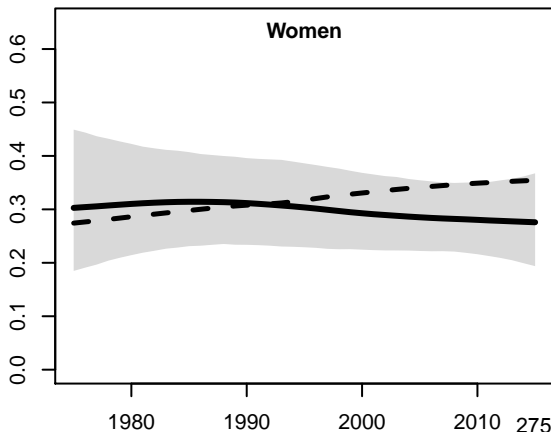

Age-standardised/Crude adult prevalence of raised blood pressure

**Botswana**  
Southern Africa

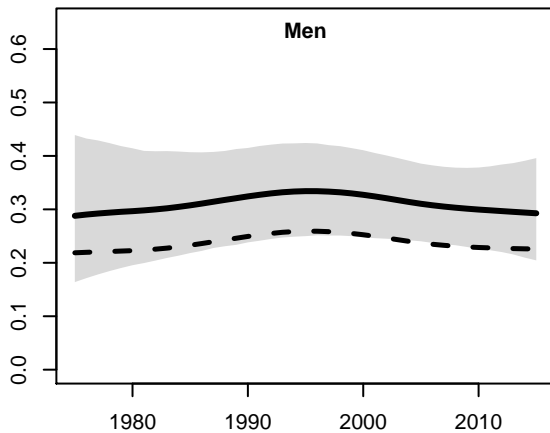

**Botswana**  
Southern Africa

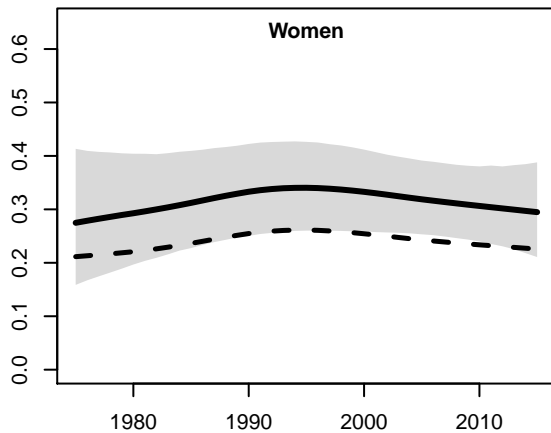

**Brazil**  
Southern and Tropical Latin America

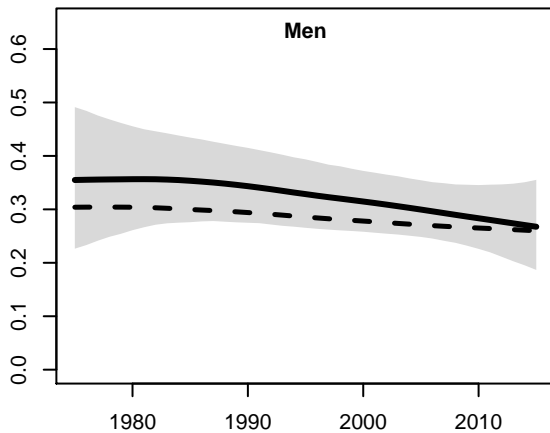

**Brazil**  
Southern and Tropical Latin America

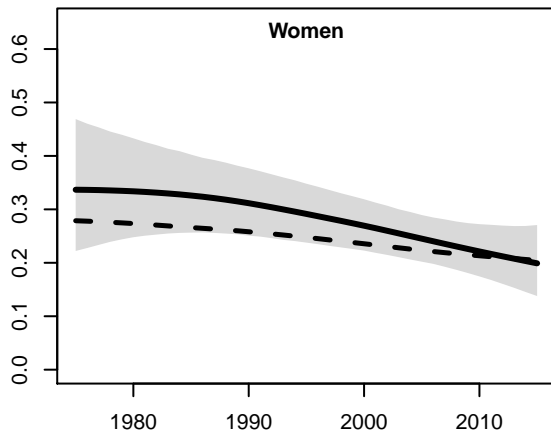

**Brunei Darussalam**  
Southeast Asia

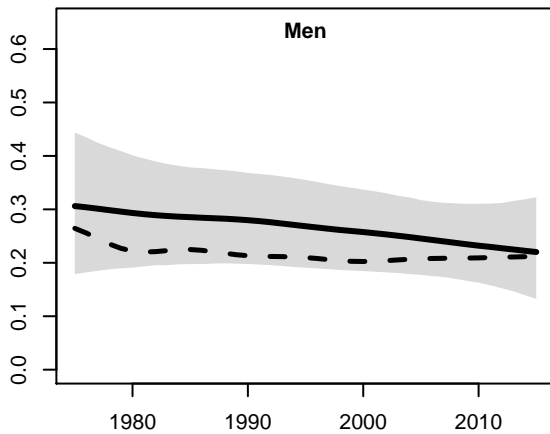

**Brunei Darussalam**  
Southeast Asia

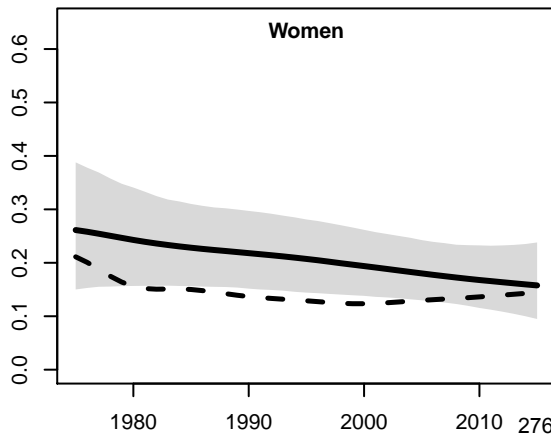

**Bulgaria**

Central Europe

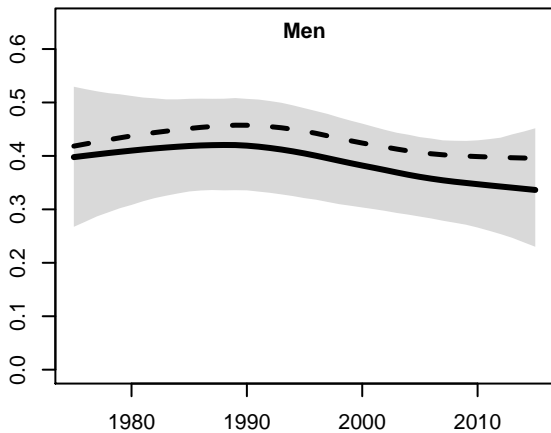**Bulgaria**

Central Europe

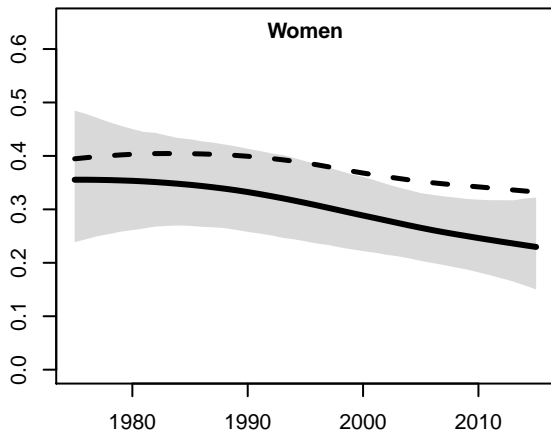**Burkina Faso**

West Africa

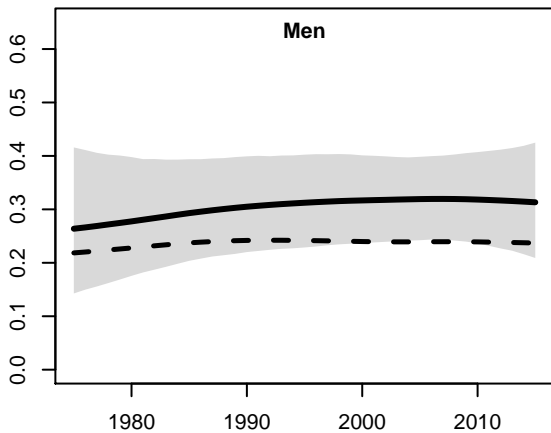**Burkina Faso**

West Africa

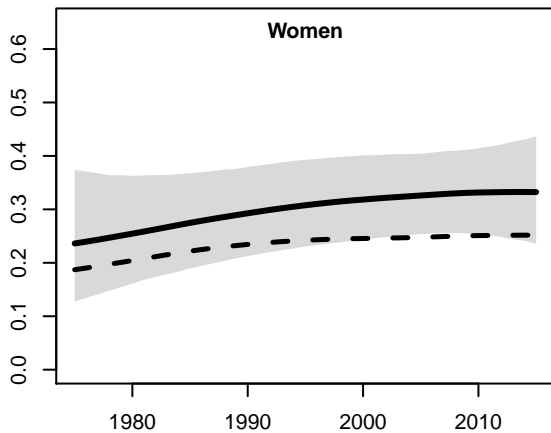**Burundi**

East Africa

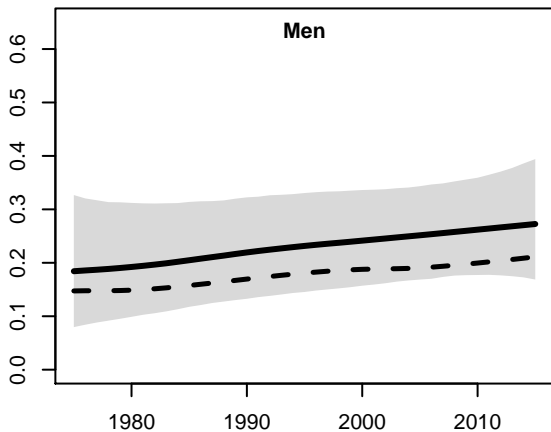**Burundi**

East Africa

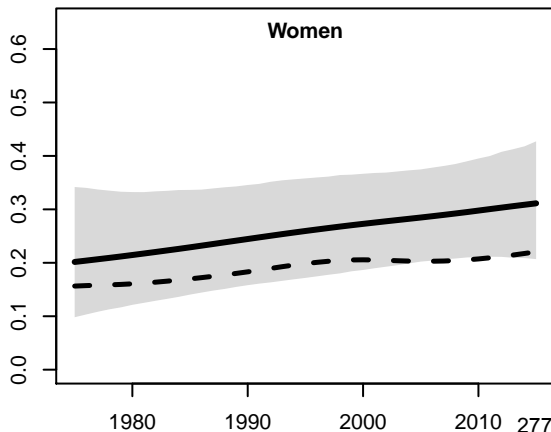

**Cabo Verde**

West Africa

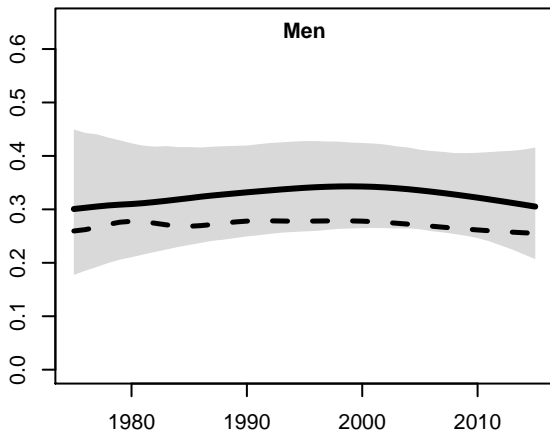**Cabo Verde**

West Africa

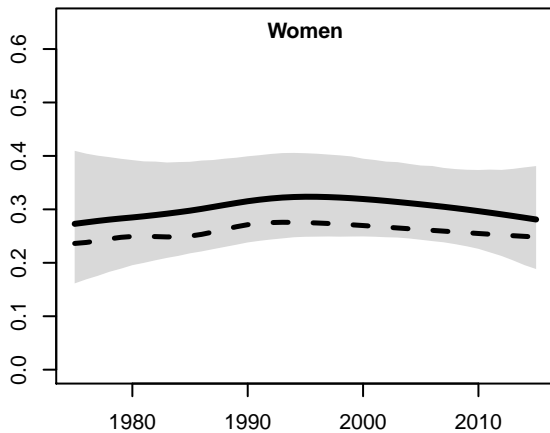**Cambodia**

Southeast Asia

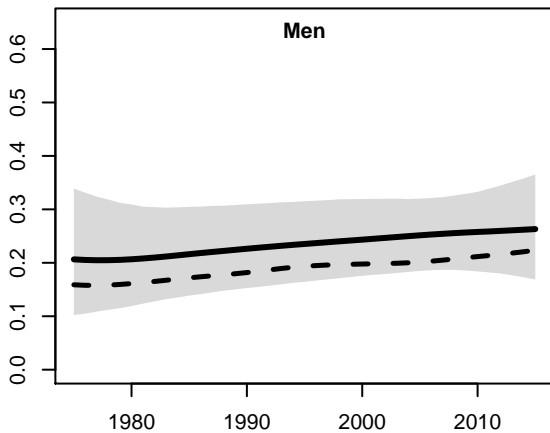**Cambodia**

Southeast Asia

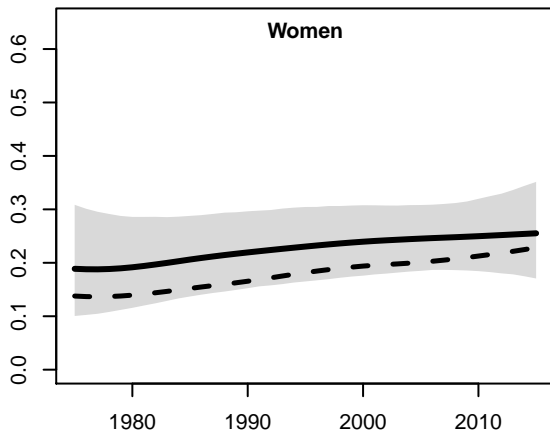**Cameroon**

West Africa

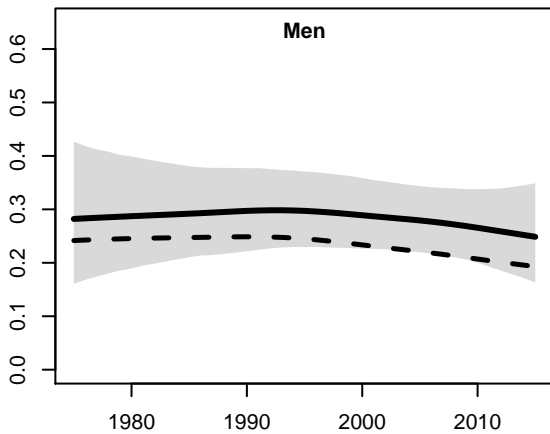**Cameroon**

West Africa

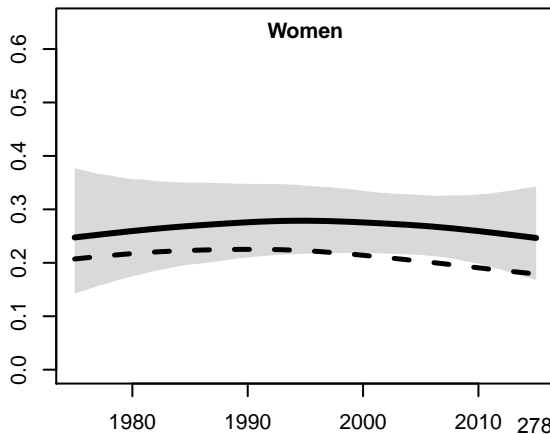



**Canada**  
High-income English-speaking countries

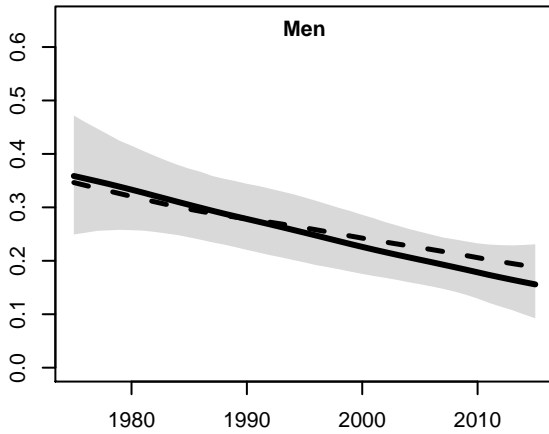

**Canada**  
High-income English-speaking countries

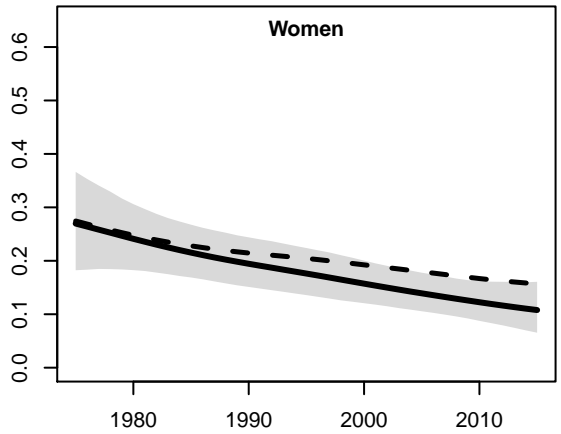

**Central African Republic**  
Central Africa

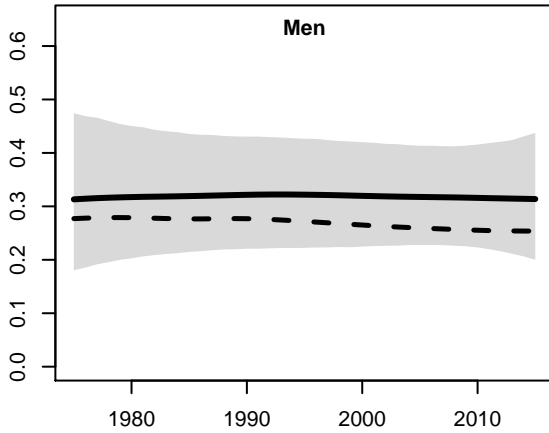

**Central African Republic**  
Central Africa

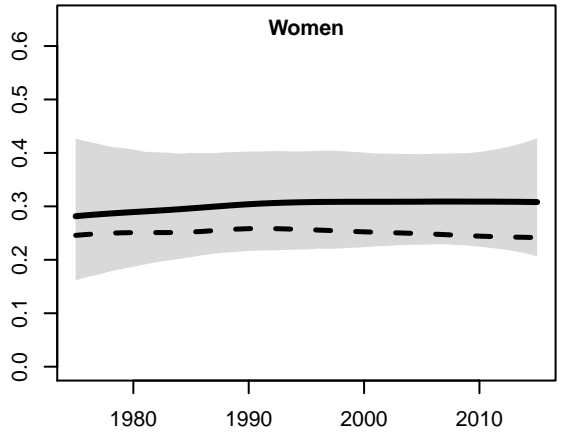

**Chad**  
West Africa

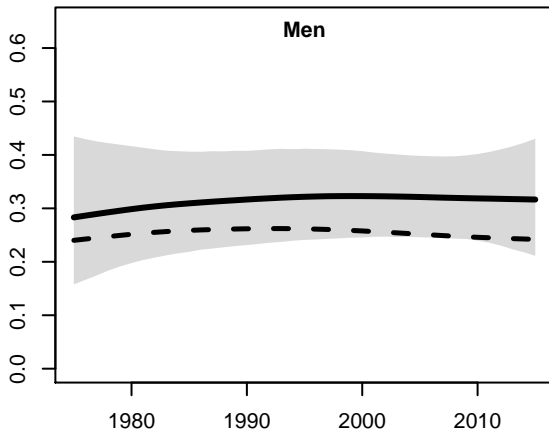

**Chad**  
West Africa

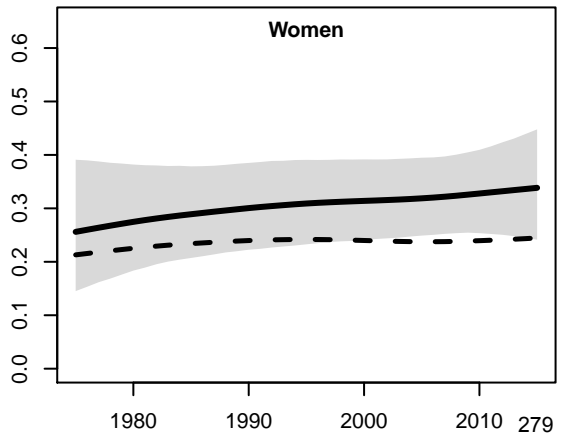

**Chile**  
Southern and Tropical Latin America

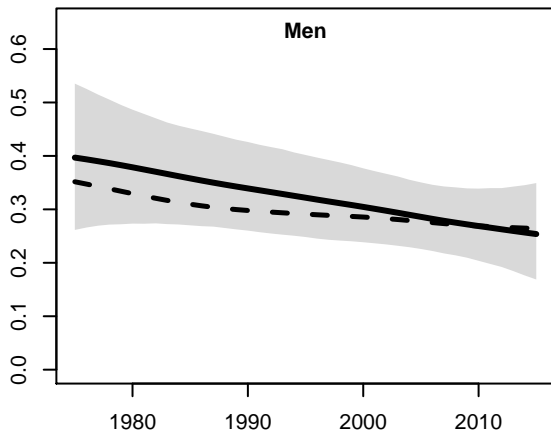

**Chile**  
Southern and Tropical Latin America

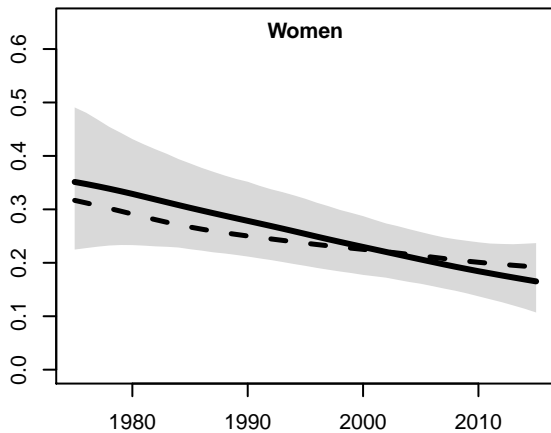

**China**  
East Asia

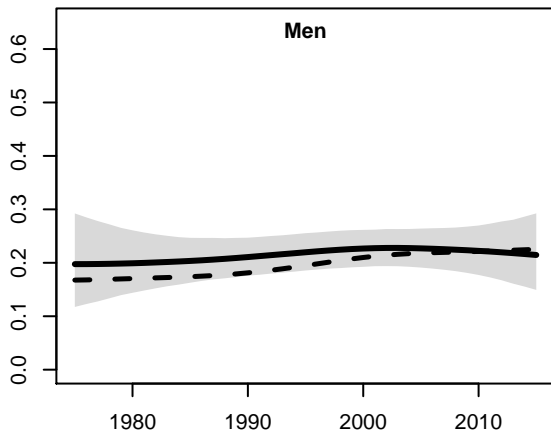

**China**  
East Asia

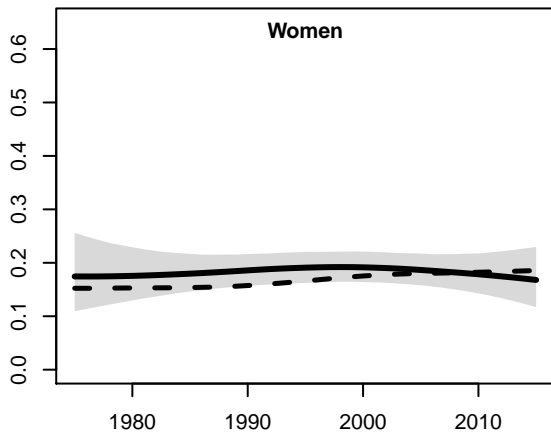

**China (Hong Kong SAR)**  
East Asia

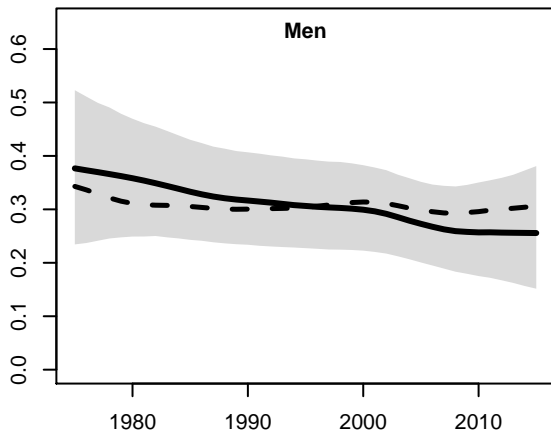

**China (Hong Kong SAR)**  
East Asia

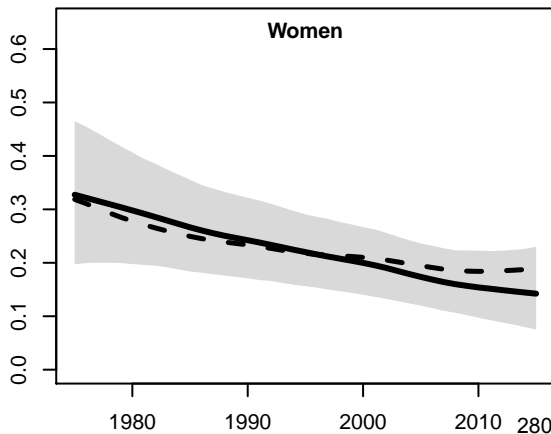

**Colombia**  
Central Latin America

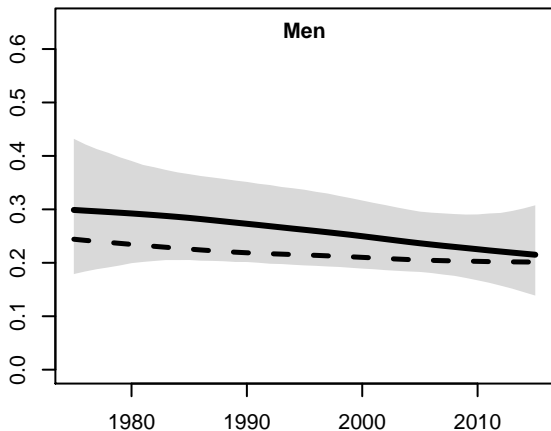

**Colombia**  
Central Latin America

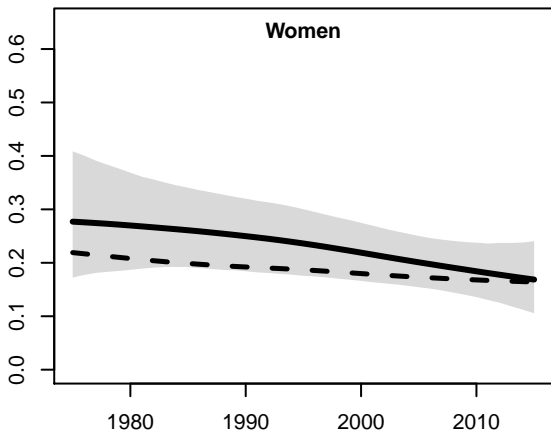

**Comoros**  
East Africa

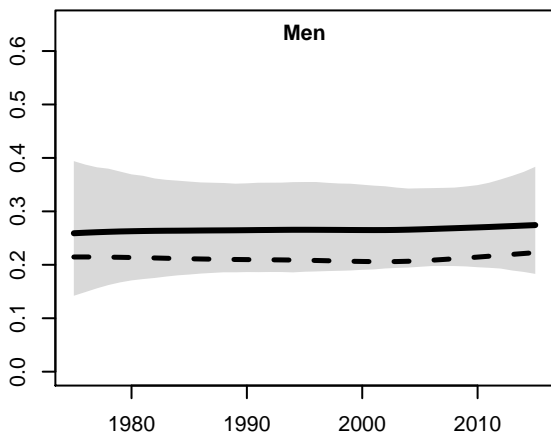

**Comoros**  
East Africa

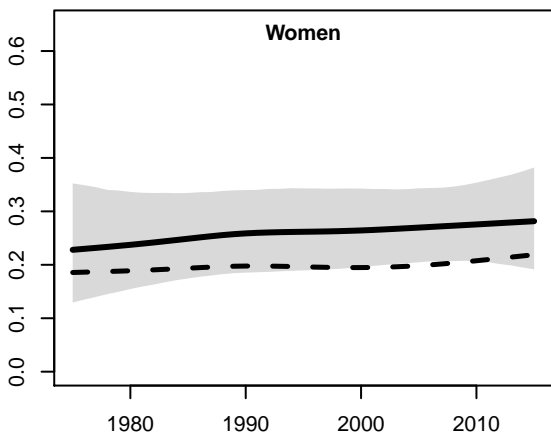

**Congo**  
Central Africa

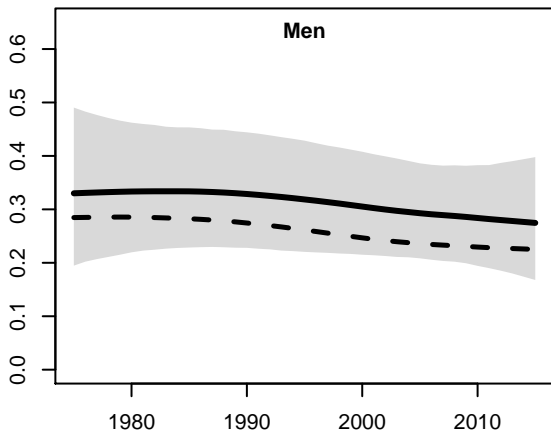

**Congo**  
Central Africa

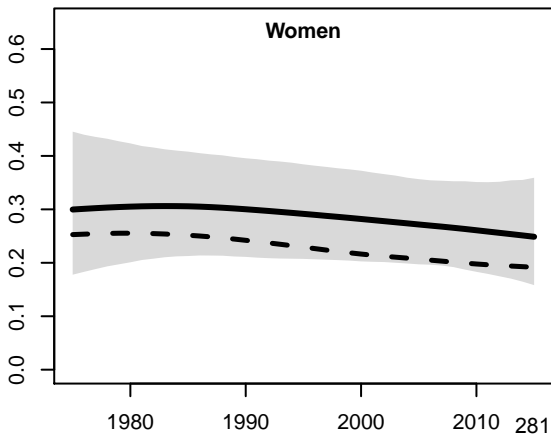

Age-standardised/Crude adult prevalence of raised blood pressure

**Cook Islands**  
Polynesia and Micronesia

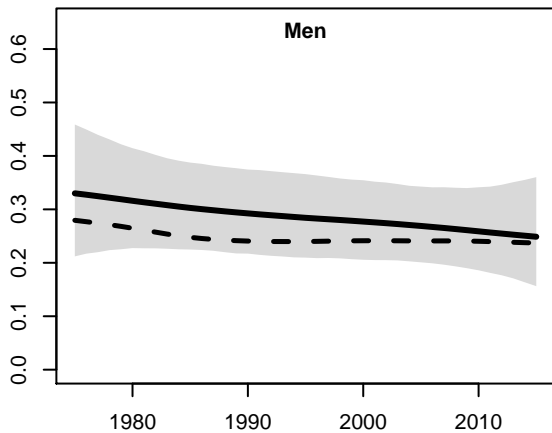

**Cook Islands**  
Polynesia and Micronesia

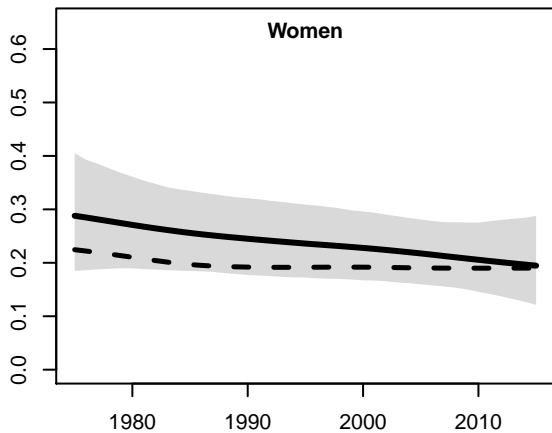

**Costa Rica**  
Central Latin America

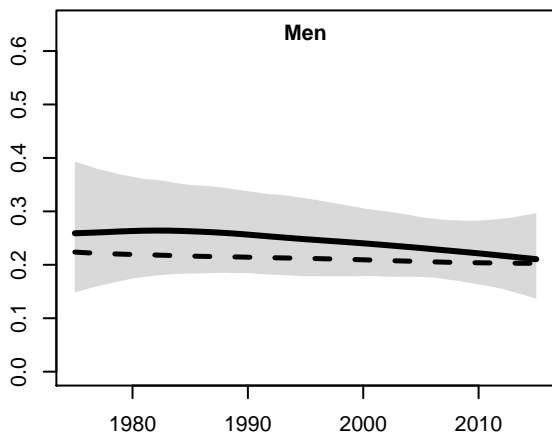

**Costa Rica**  
Central Latin America

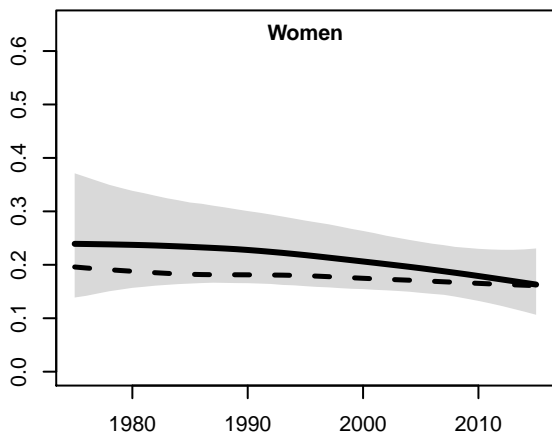

**Cote d'Ivoire**  
West Africa

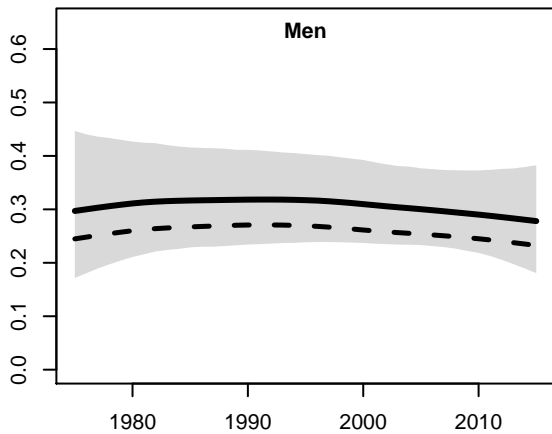

**Cote d'Ivoire**  
West Africa

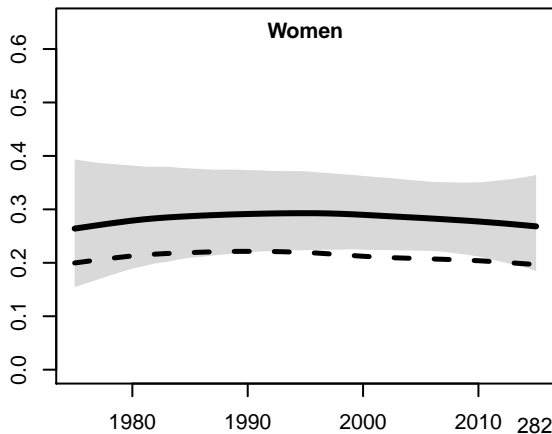

Age-standardised/Crude adult prevalence of raised blood pressure

### Croatia

Central Europe

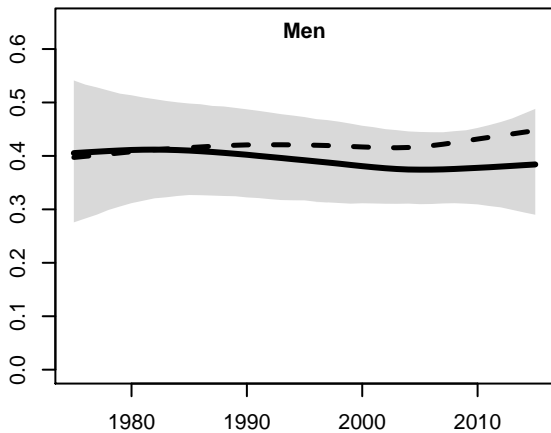

### Croatia

Central Europe

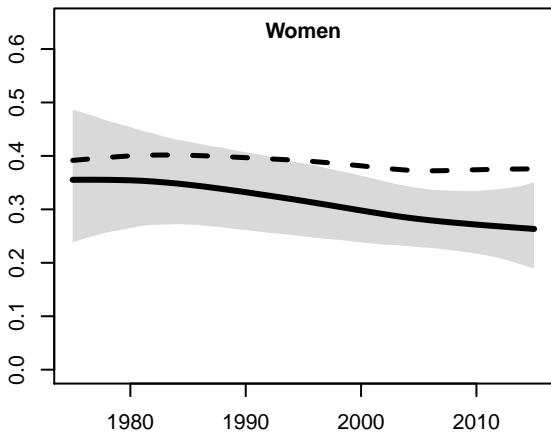

### Cuba

Caribbean

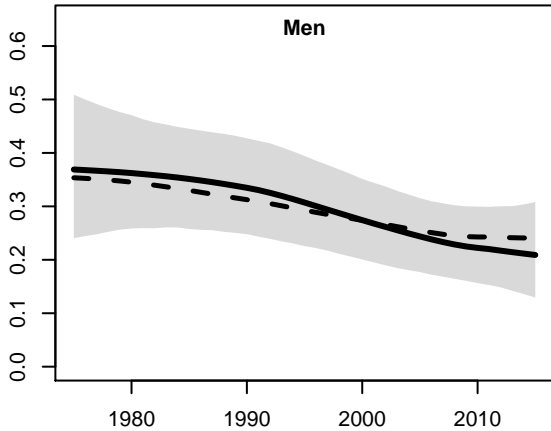

### Cuba

Caribbean

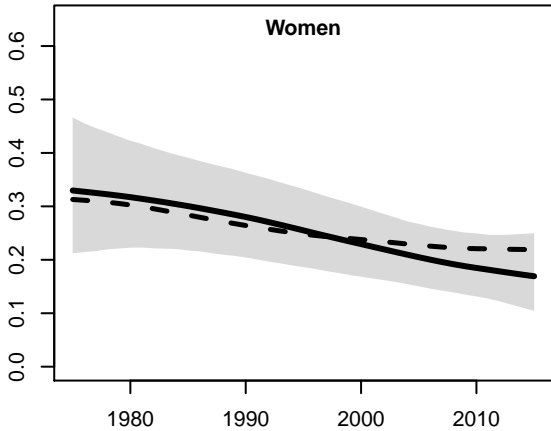

### Cyprus

South Western Europe

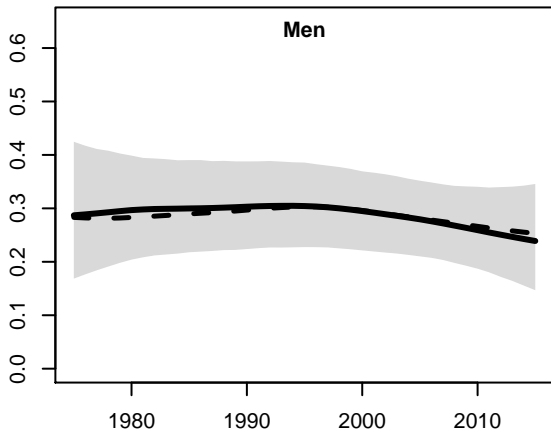

### Cyprus

South Western Europe

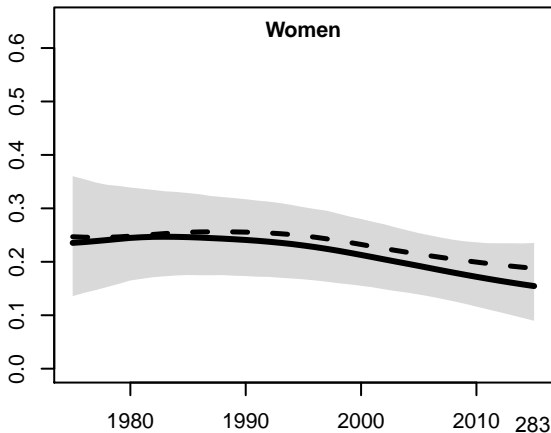

**Czech Republic**

Central Europe

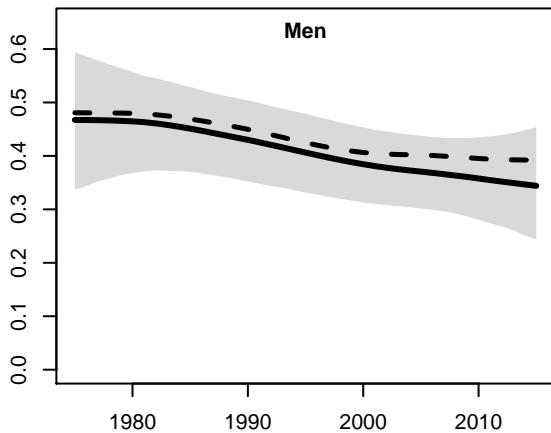**Czech Republic**

Central Europe

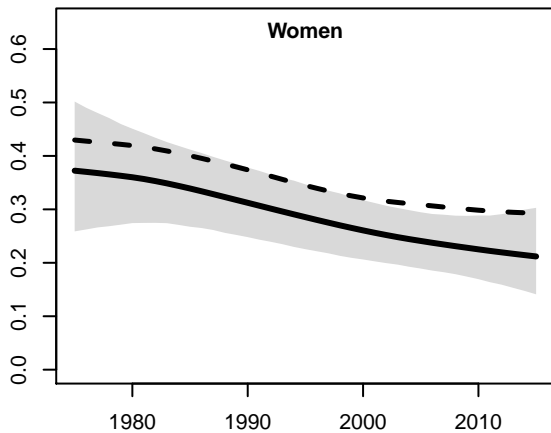**Denmark**

North Western Europe

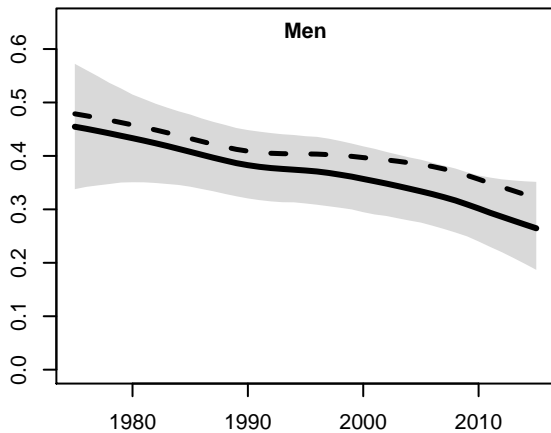**Denmark**

North Western Europe

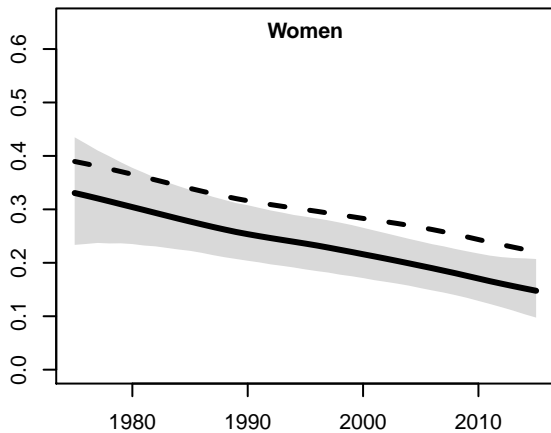**Djibouti**

East Africa

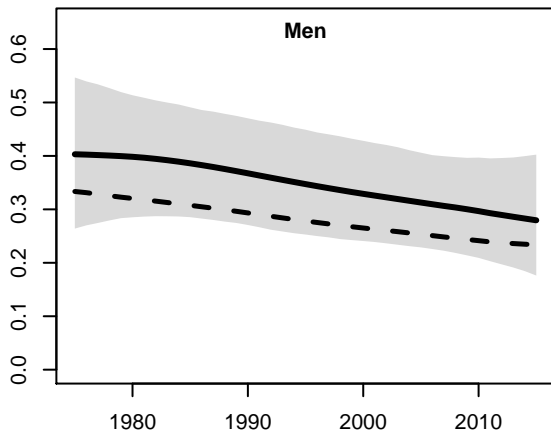**Djibouti**

East Africa

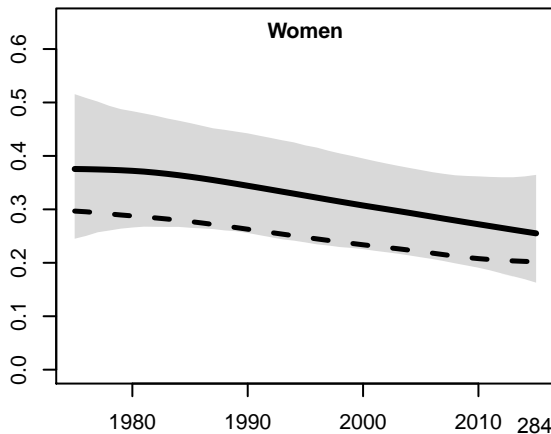

**Dominica**  
Caribbean

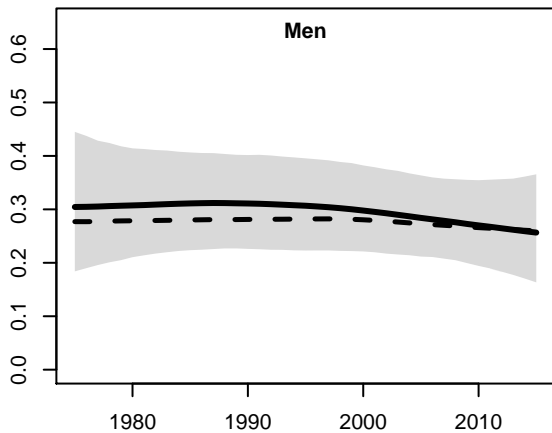

**Dominica**  
Caribbean

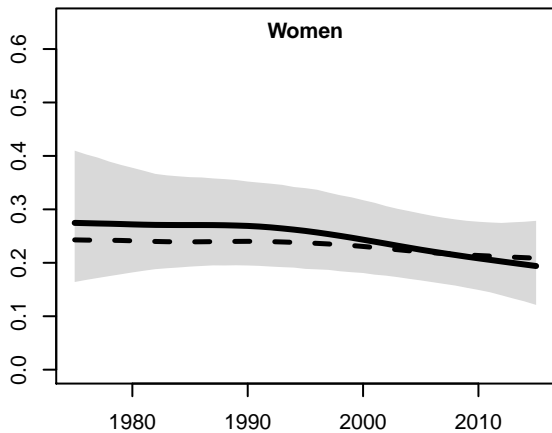

**Dominican Republic**  
Caribbean

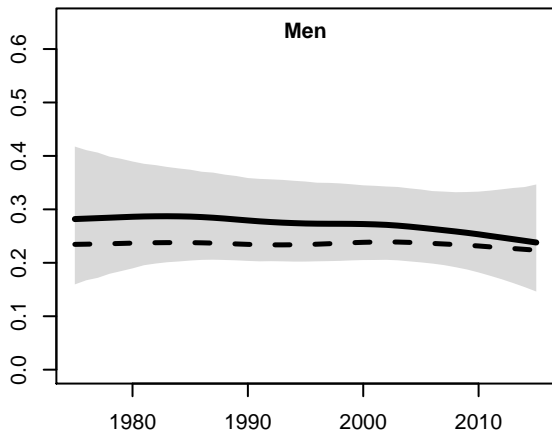

**Dominican Republic**  
Caribbean

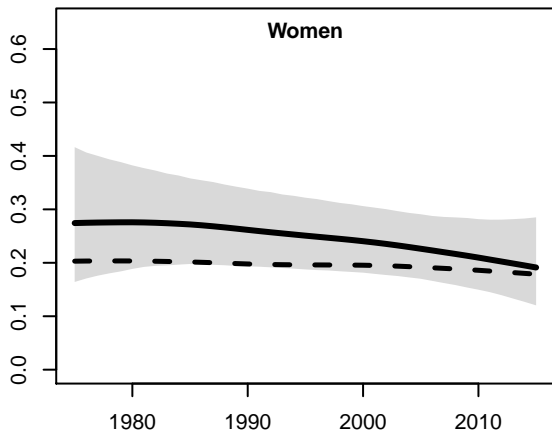

**DR Congo**  
Central Africa

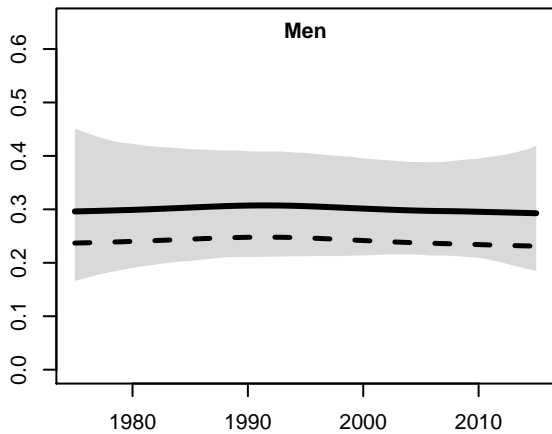

**DR Congo**  
Central Africa

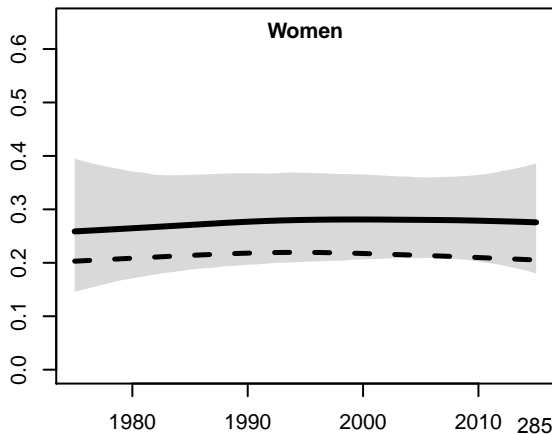

**Ecuador**  
Andean Latin America

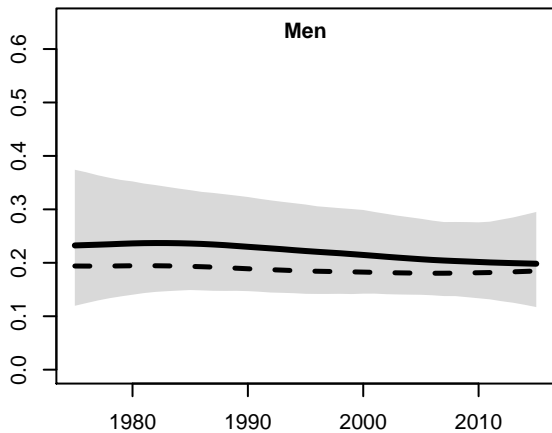

**Ecuador**  
Andean Latin America

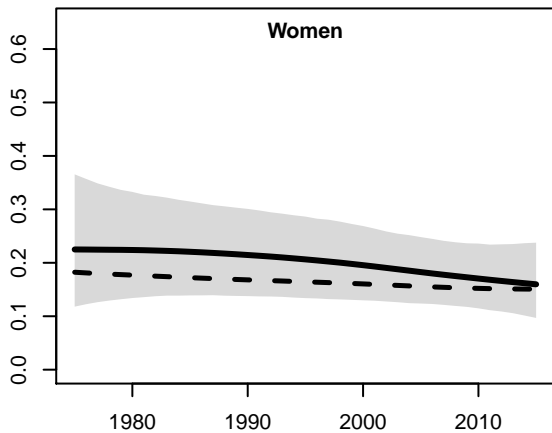

**Egypt**  
Middle East and North Africa

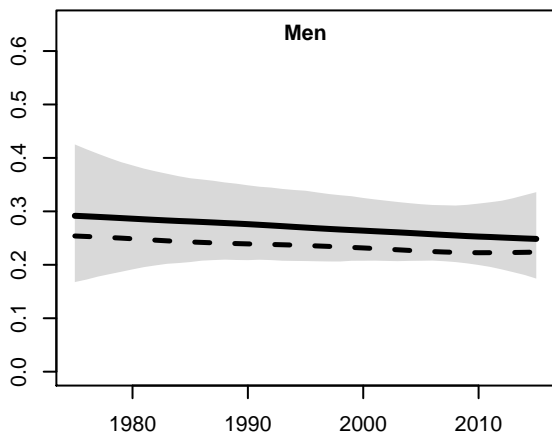

**Egypt**  
Middle East and North Africa

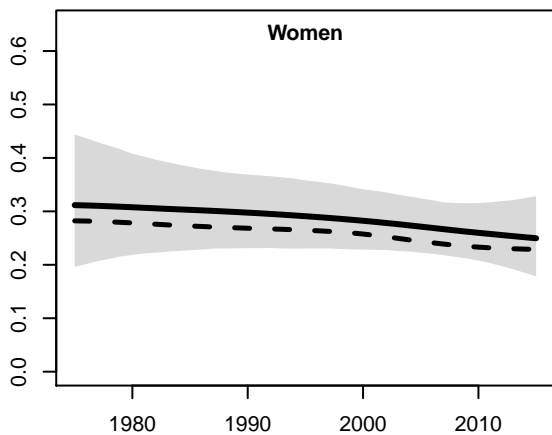

**El Salvador**  
Central Latin America

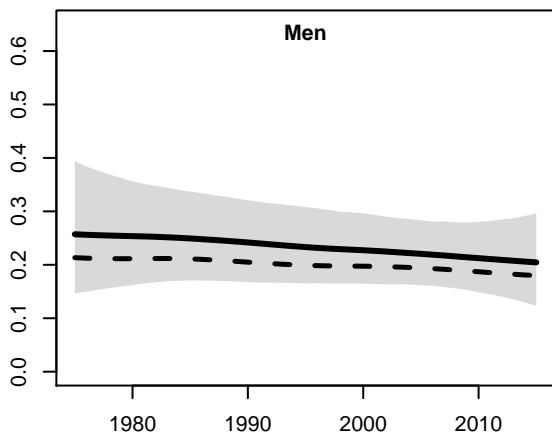

**El Salvador**  
Central Latin America

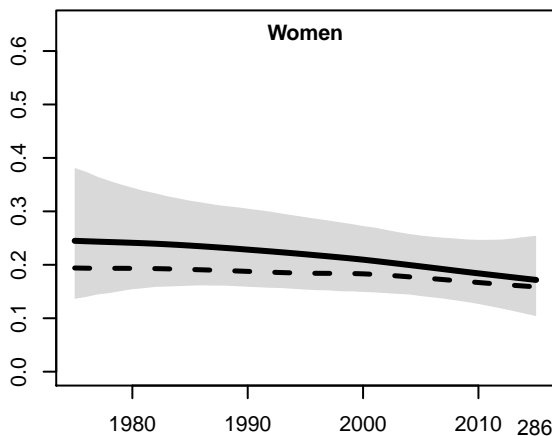



### Equatorial Guinea

Central Africa

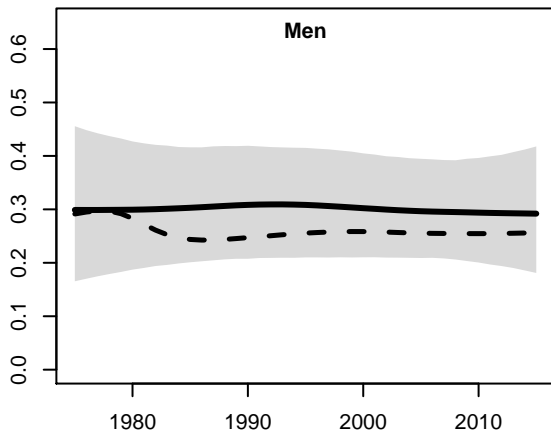

### Equatorial Guinea

Central Africa

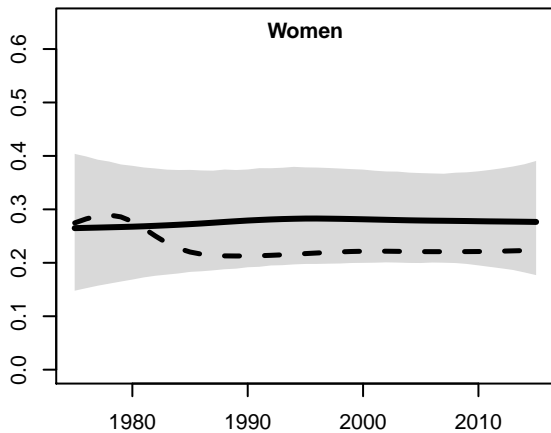

### Eritrea

East Africa

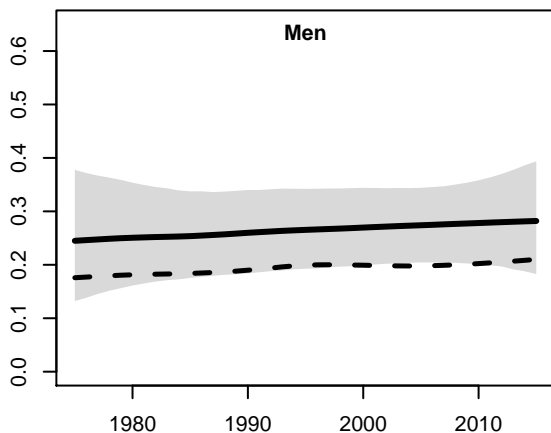

### Eritrea

East Africa

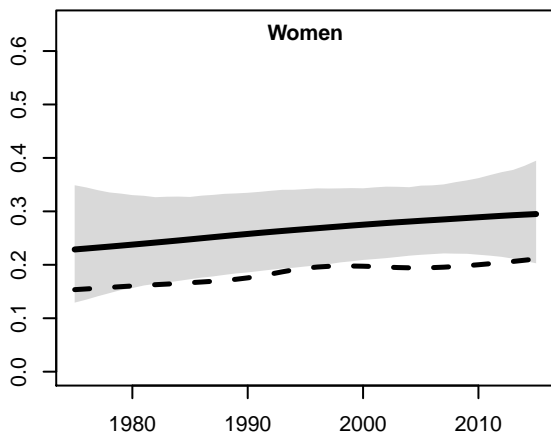

### Estonia

Eastern Europe

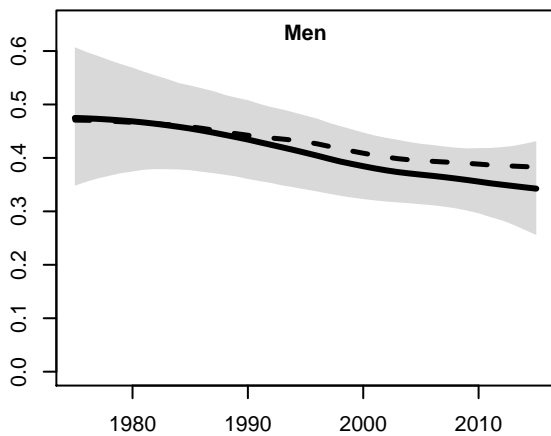

### Estonia

Eastern Europe

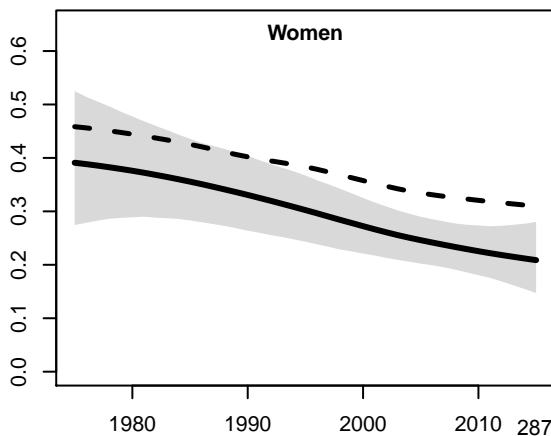

**Ethiopia**  
East Africa

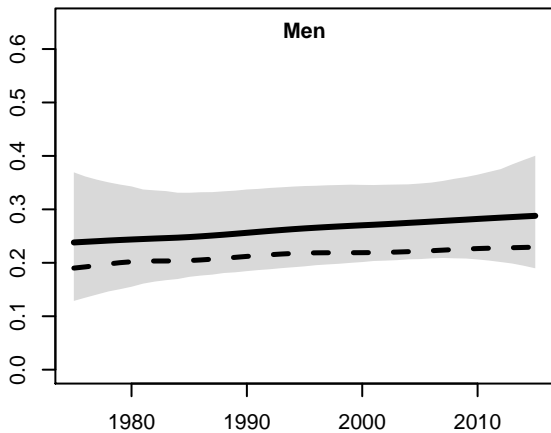

**Ethiopia**  
East Africa

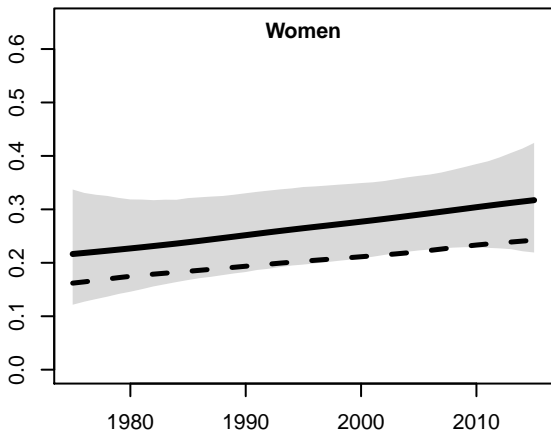

**Fiji**  
Melanesia

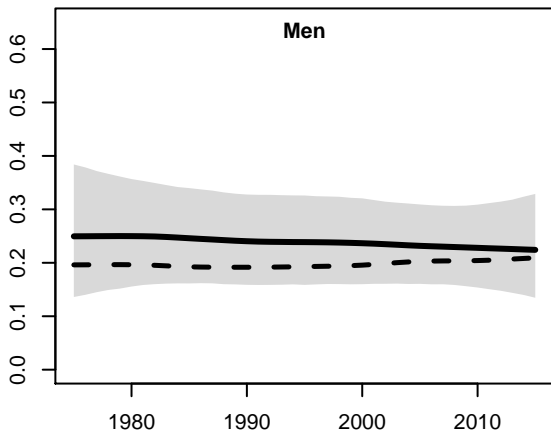

**Fiji**  
Melanesia

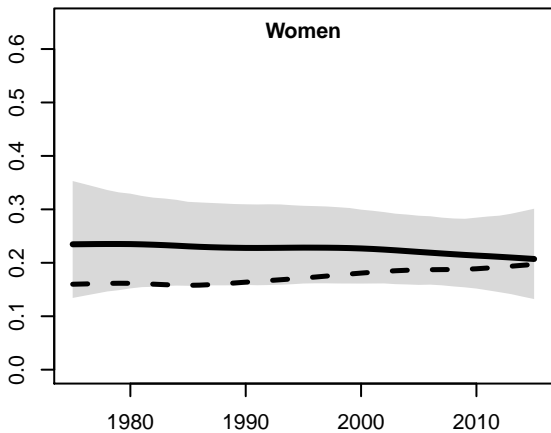

**Finland**  
North Western Europe

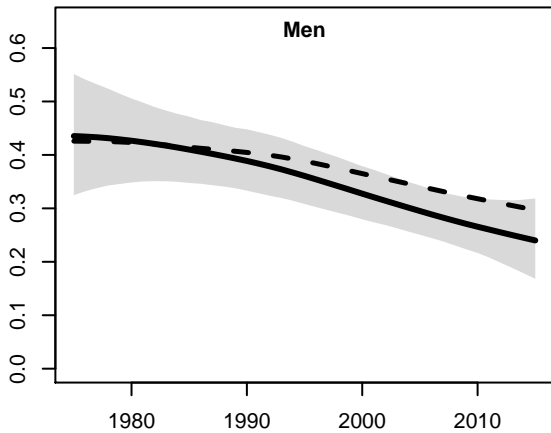

**Finland**  
North Western Europe

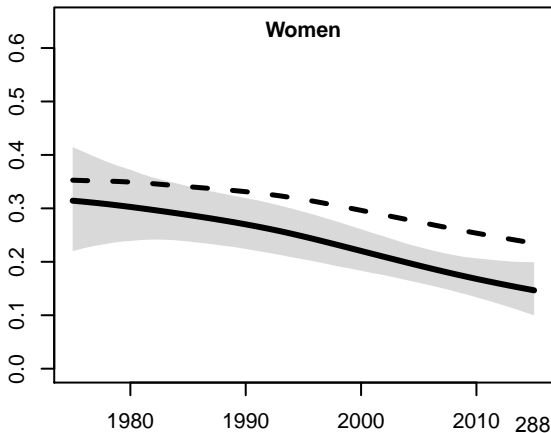

Age-standardised/Crude adult prevalence of raised blood pressure

**France**  
South Western Europe

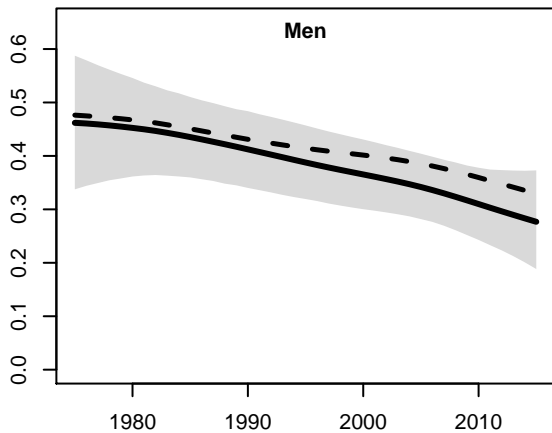

**France**  
South Western Europe

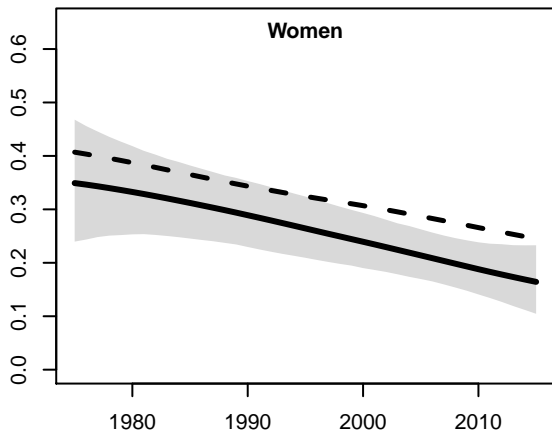

**French Polynesia**  
Polynesia and Micronesia

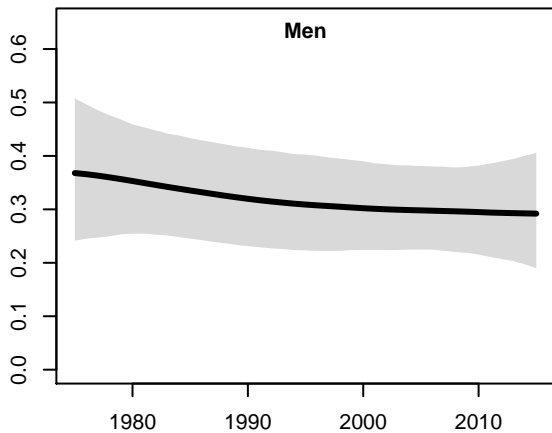

**French Polynesia**  
Polynesia and Micronesia

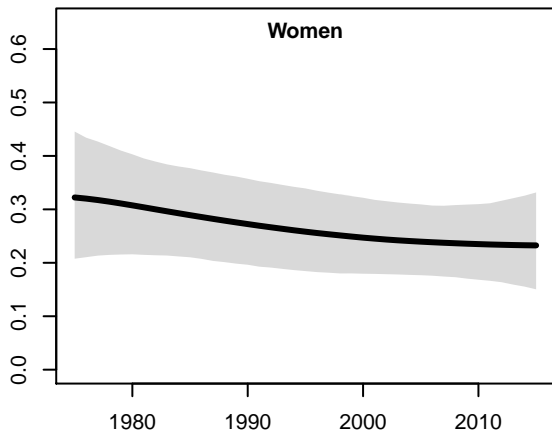

**Gabon**  
Central Africa

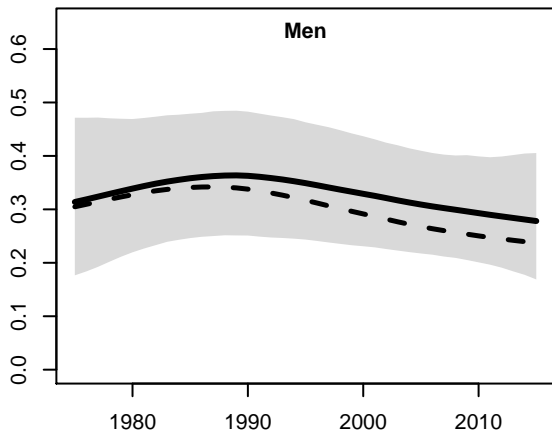

**Gabon**  
Central Africa

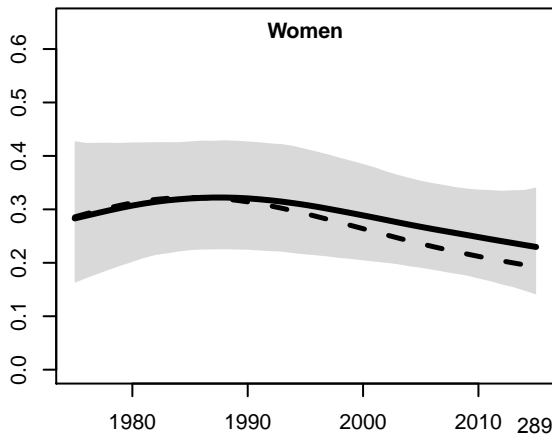

**Gambia**  
West Africa

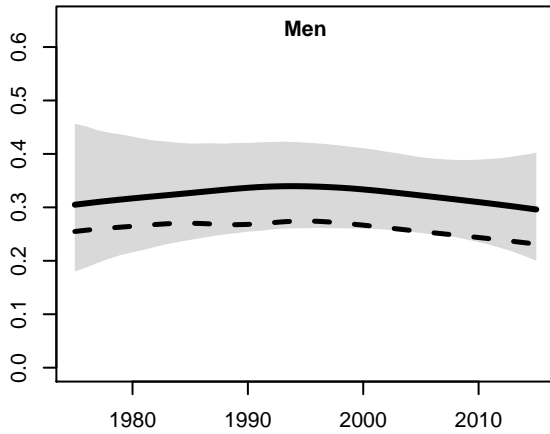

**Gambia**  
West Africa

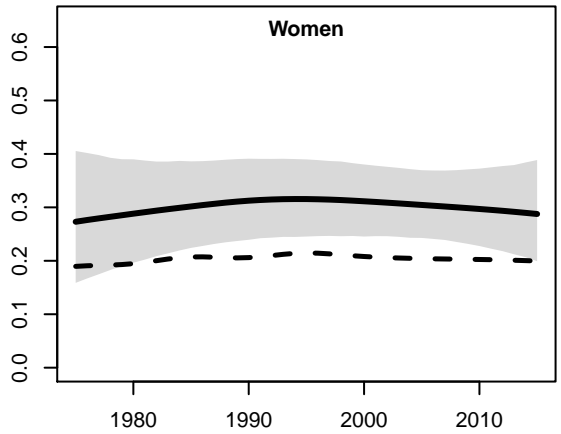

**Georgia**  
Central Asia

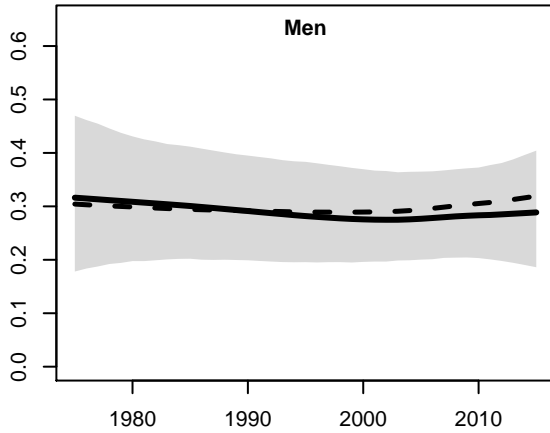

**Georgia**  
Central Asia

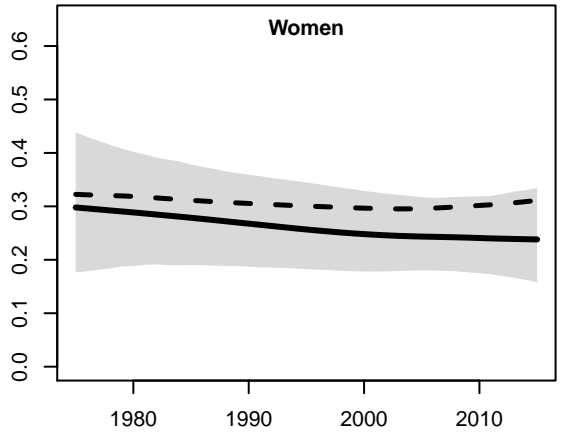

**Germany**  
North Western Europe

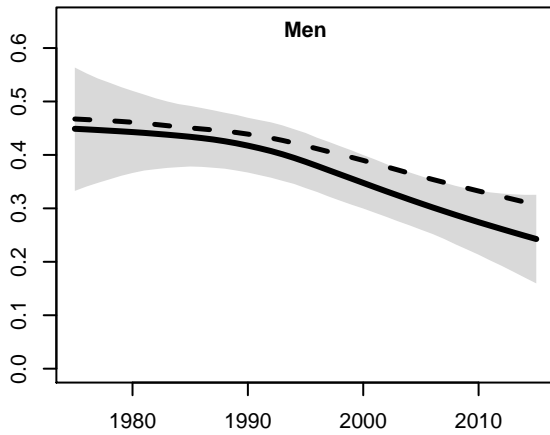

**Germany**  
North Western Europe

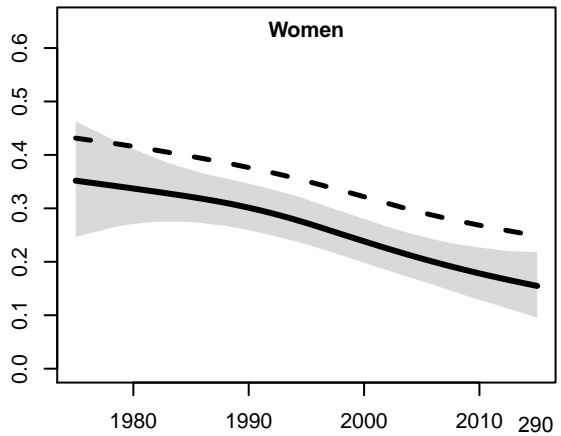

### Ghana

West Africa

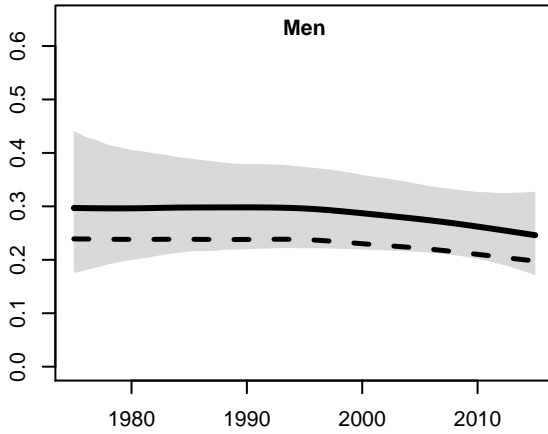

### Ghana

West Africa

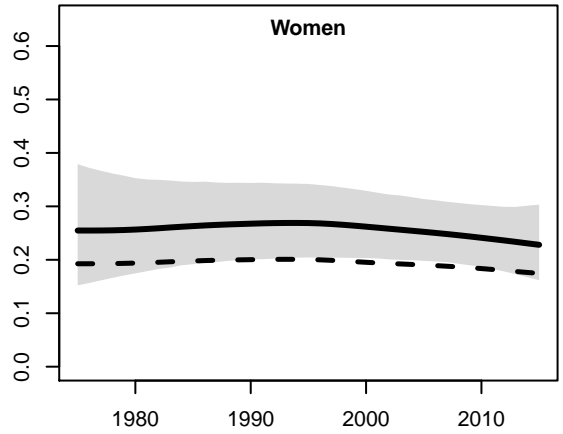

### Greece

South Western Europe

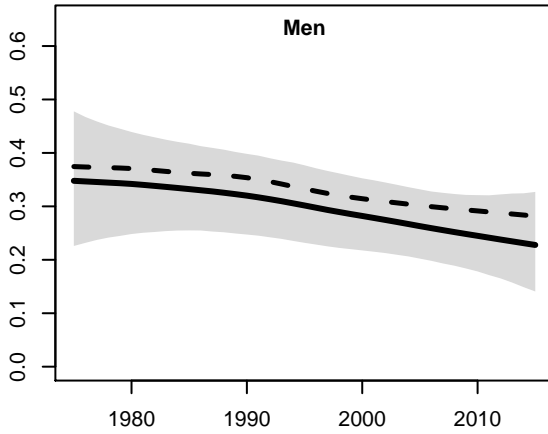

### Greece

South Western Europe

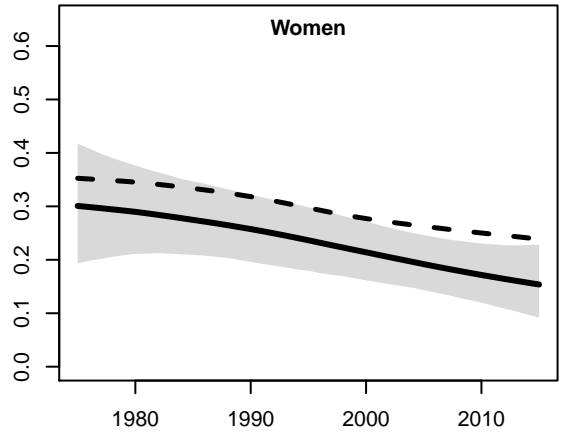

### Greenland

North Western Europe

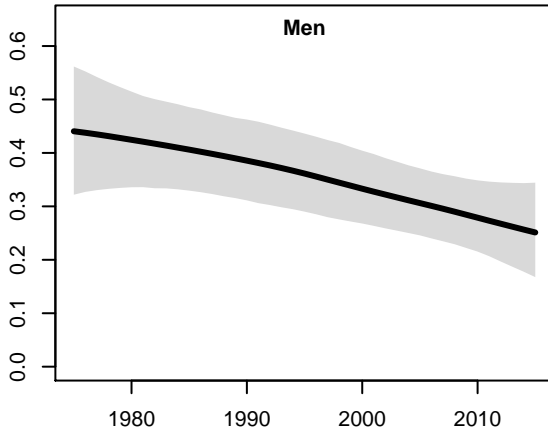

### Greenland

North Western Europe

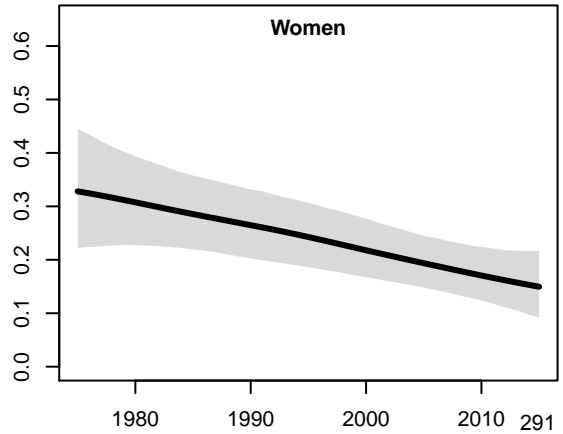

Age-standardised/Crude adult prevalence of raised blood pressure

**Grenada**  
Caribbean

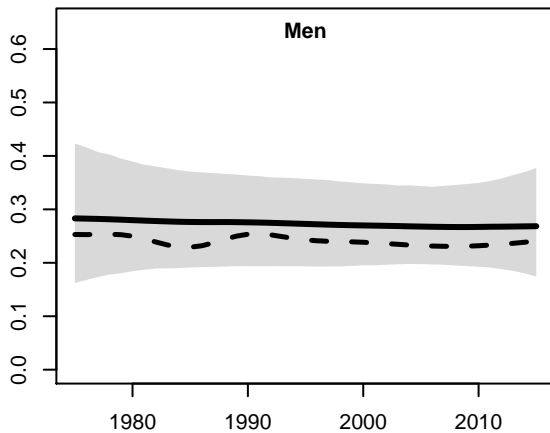

**Grenada**  
Caribbean

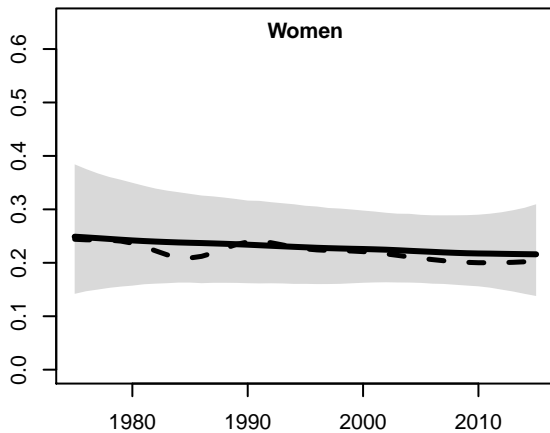

**Guatemala**  
Central Latin America

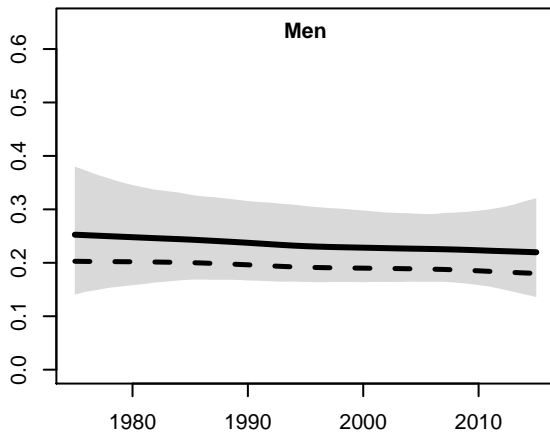

**Guatemala**  
Central Latin America

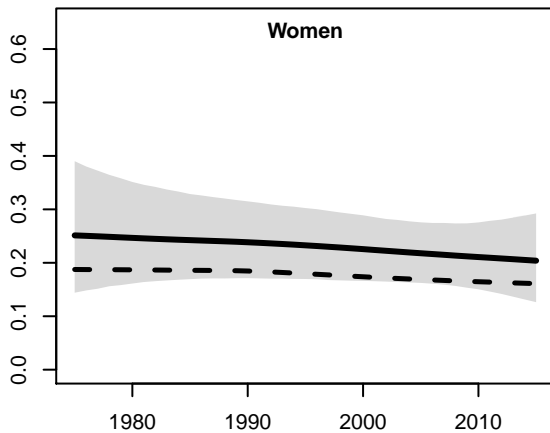

**Guinea**  
West Africa

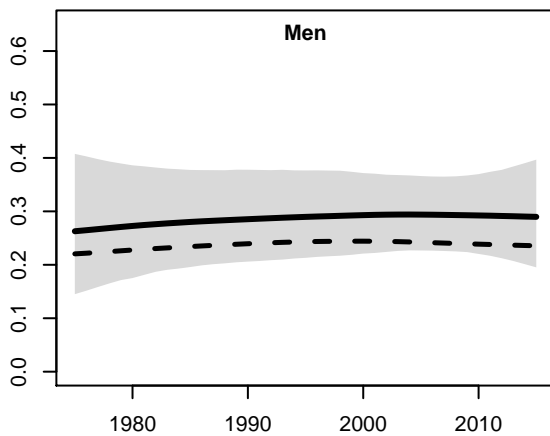

**Guinea**  
West Africa

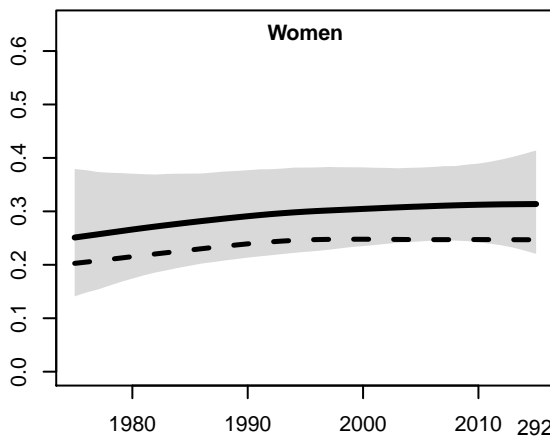

### Guinea Bissau

West Africa

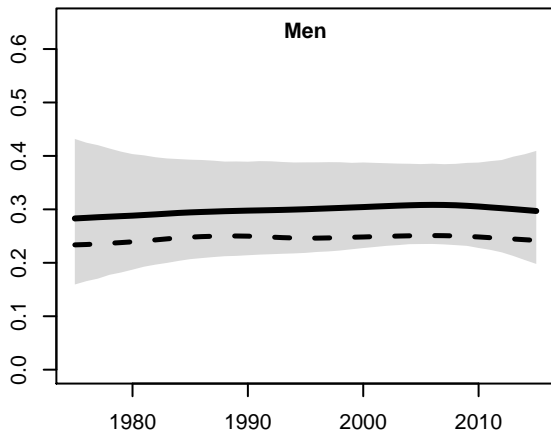

### Guinea Bissau

West Africa

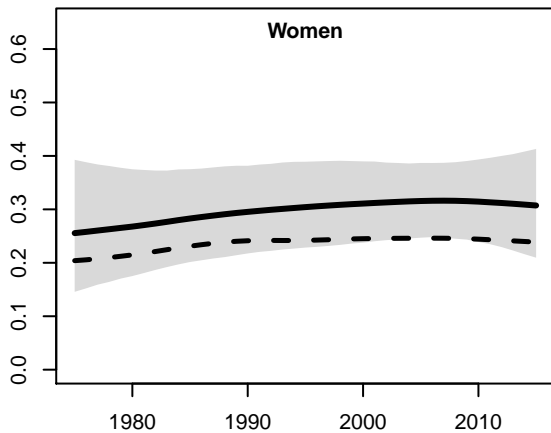

### Guyana

Caribbean

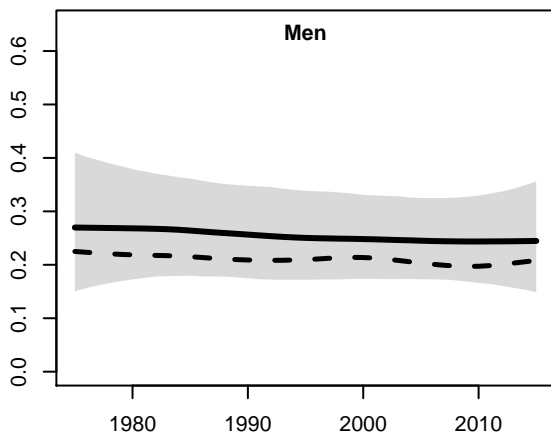

### Guyana

Caribbean

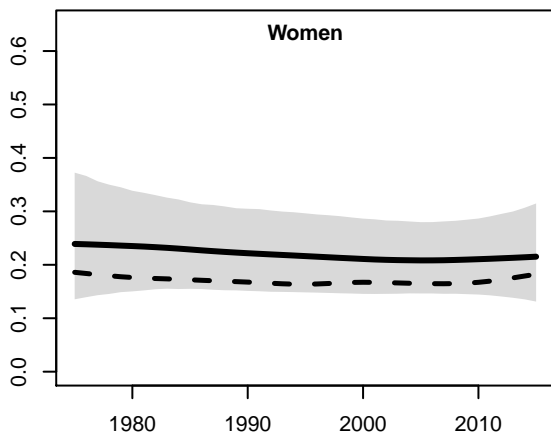

### Haiti

Caribbean

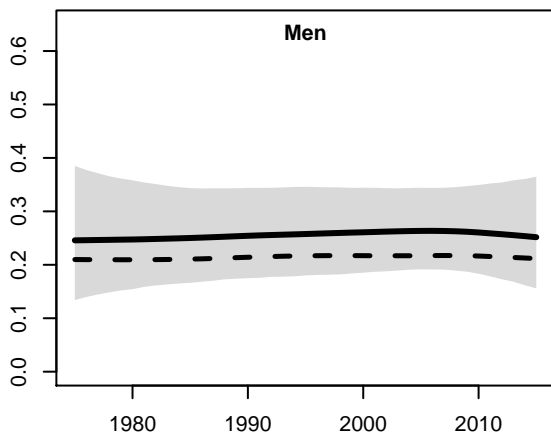

### Haiti

Caribbean

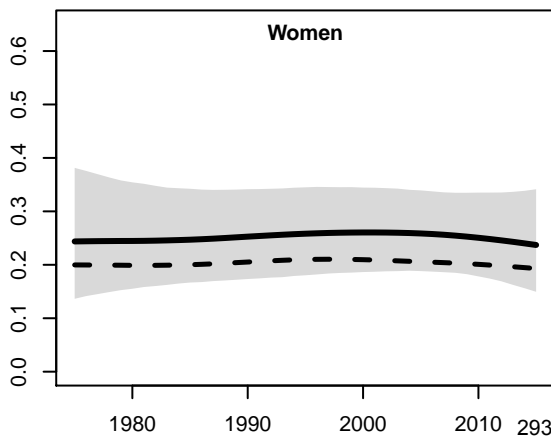

**Honduras**  
Central Latin America

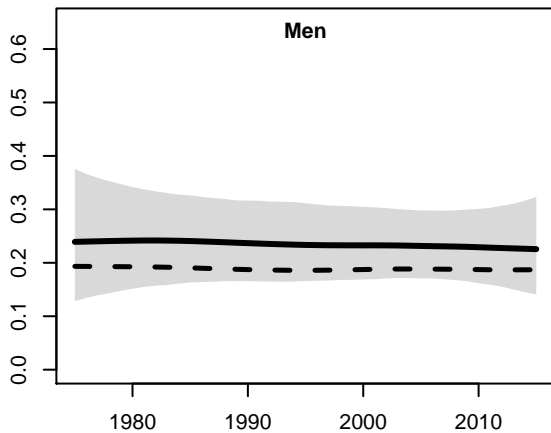

**Honduras**  
Central Latin America

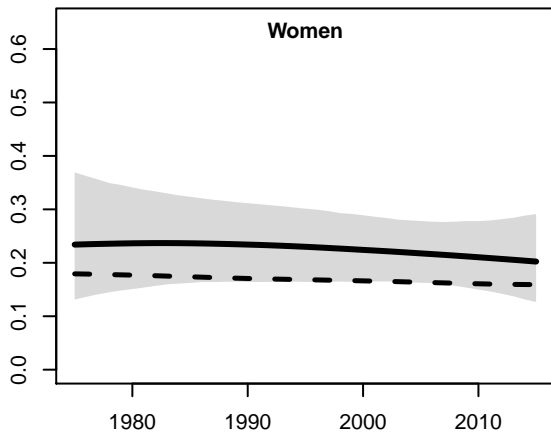

**Hungary**  
Central Europe

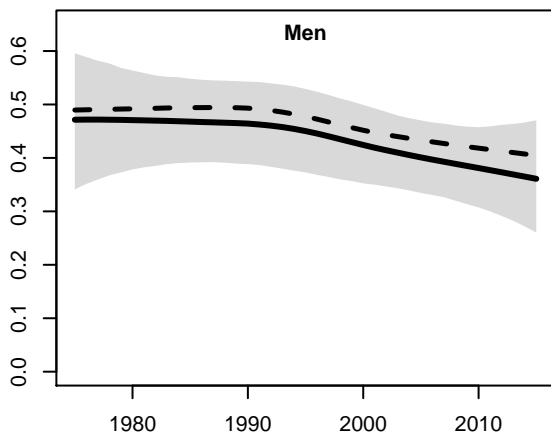

**Hungary**  
Central Europe

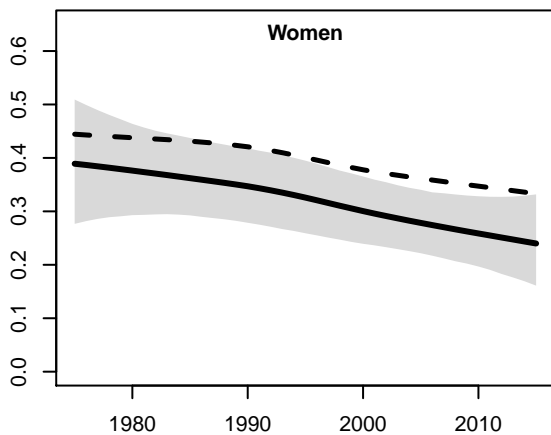

**Iceland**  
North Western Europe

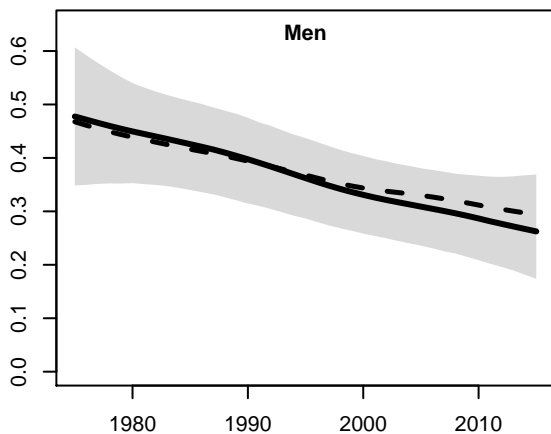

**Iceland**  
North Western Europe

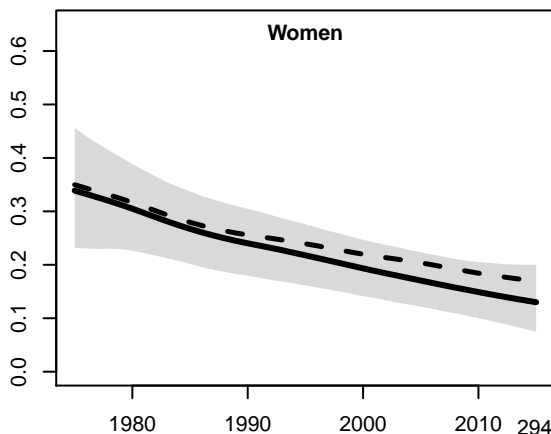



**India**  
South Asia

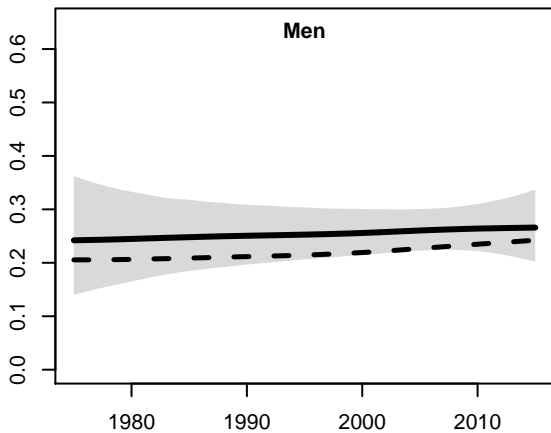

**India**  
South Asia

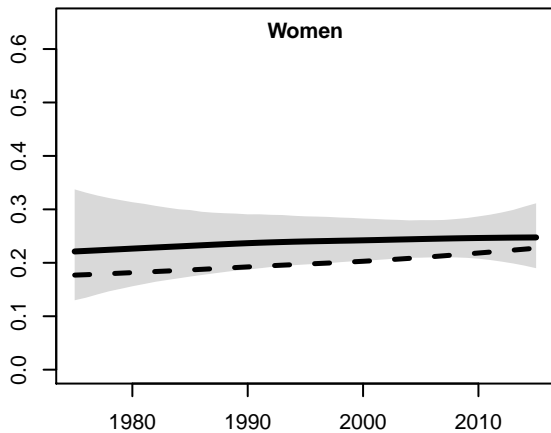

**Indonesia**  
Southeast Asia

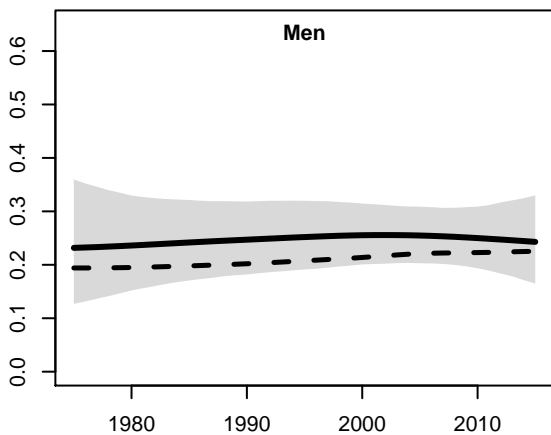

**Indonesia**  
Southeast Asia

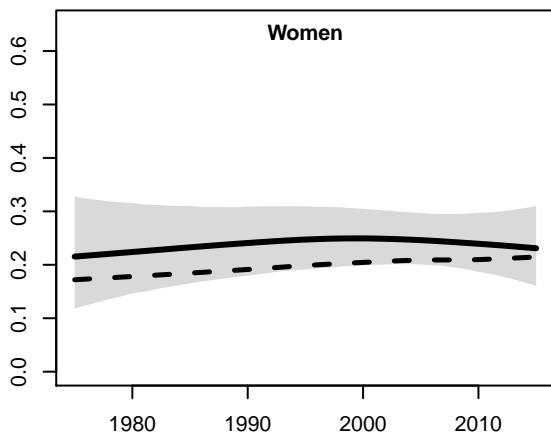

**Iran**  
Middle East and North Africa

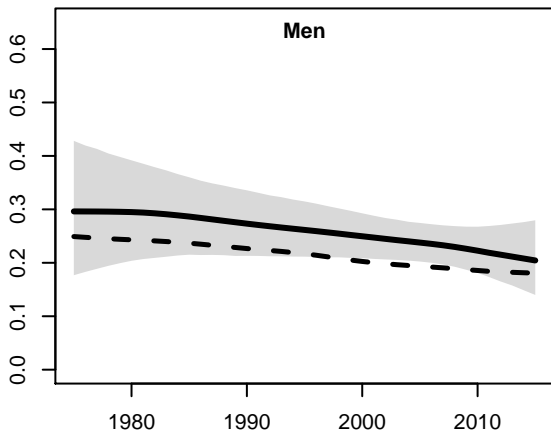

**Iran**  
Middle East and North Africa

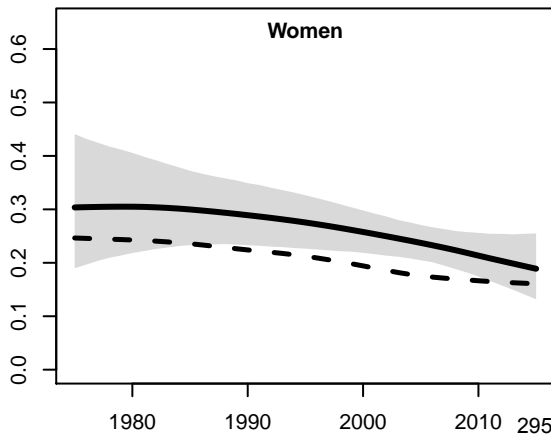

**Iraq**  
Middle East and North Africa

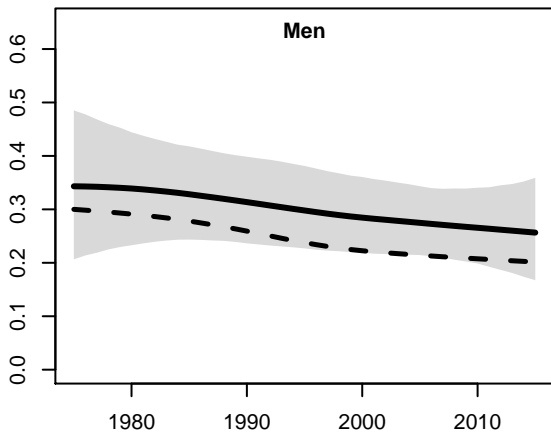

**Iraq**  
Middle East and North Africa

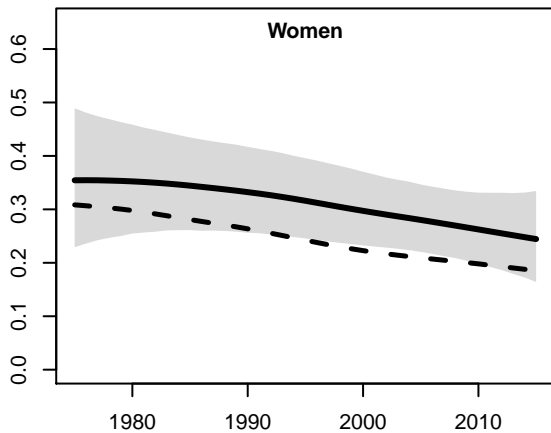

**Ireland**  
High-income English-speaking countries

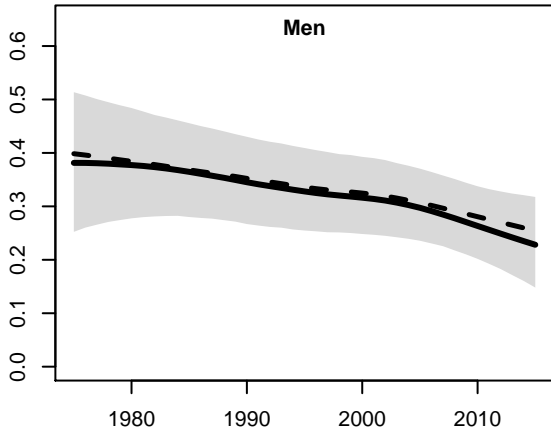

**Ireland**  
High-income English-speaking countries

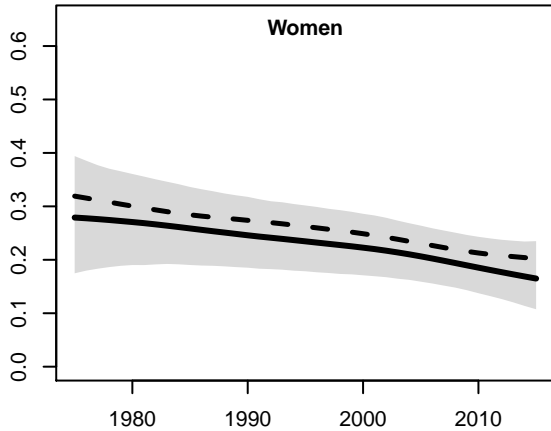

**Israel**  
South Western Europe

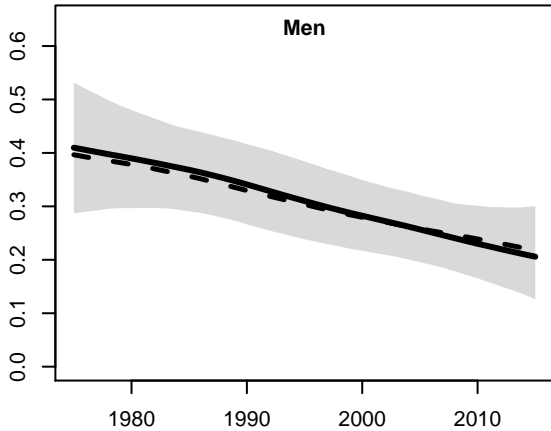

**Israel**  
South Western Europe

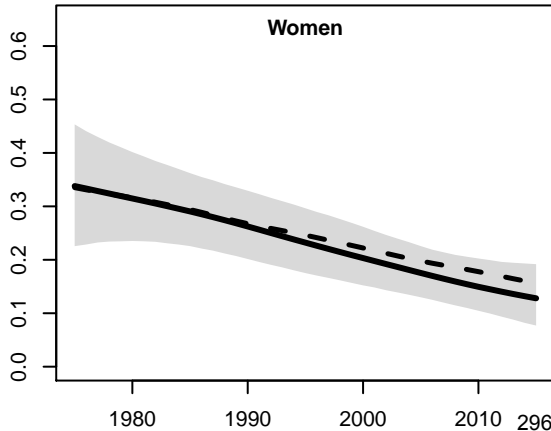

**Italy**  
South Western Europe

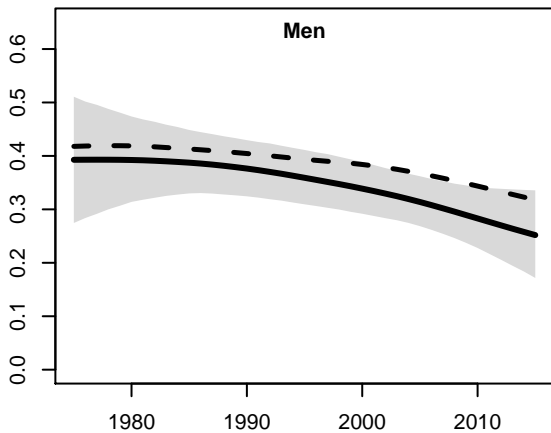

**Italy**  
South Western Europe

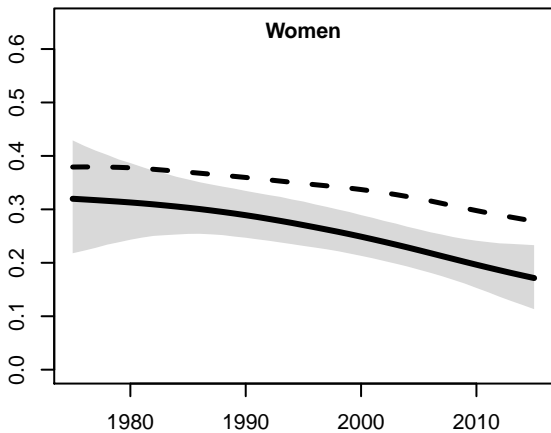

**Jamaica**  
Caribbean

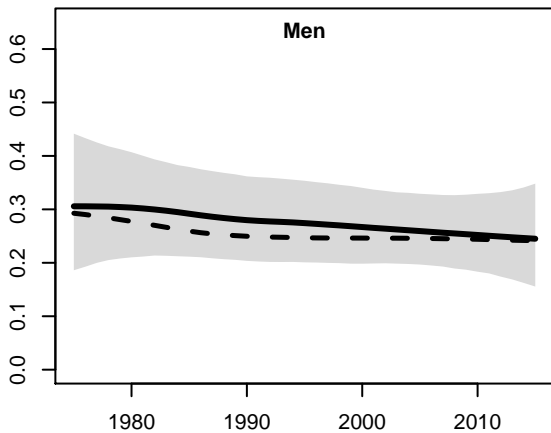

**Jamaica**  
Caribbean

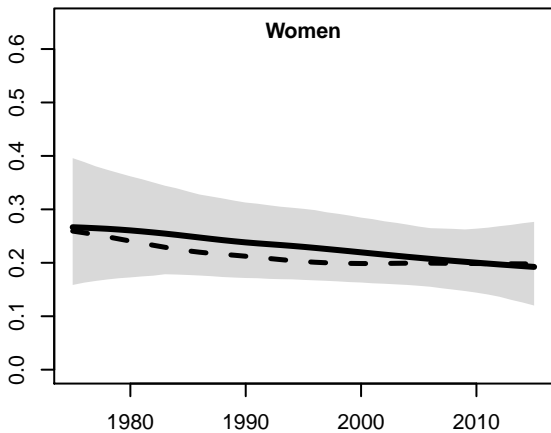

**Japan**  
High-income Asia Pacific

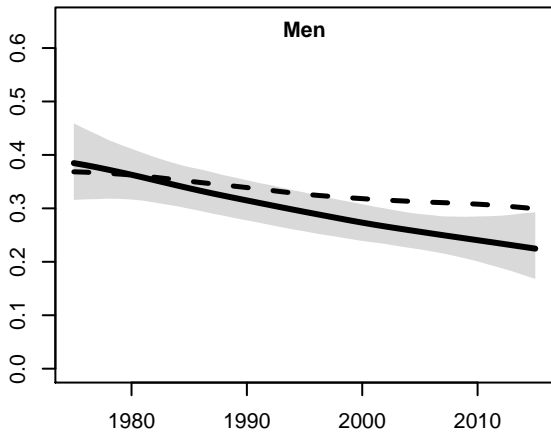

**Japan**  
High-income Asia Pacific

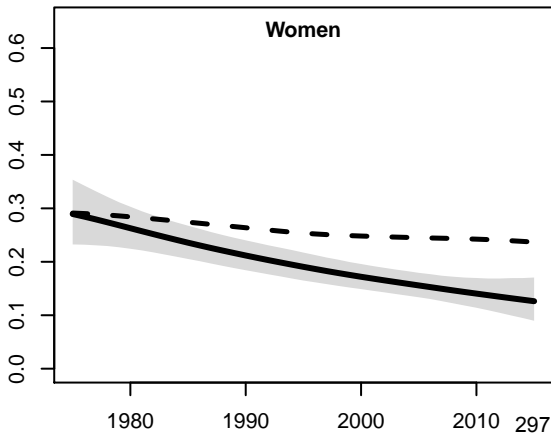

Age-standardised/Crude adult prevalence of raised blood pressure

**Jordan**  
Middle East and North Africa

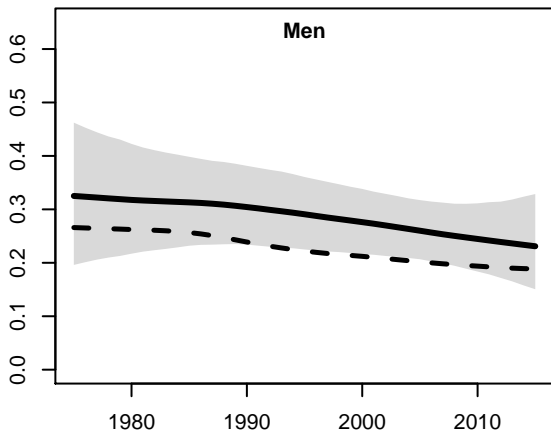

**Jordan**  
Middle East and North Africa

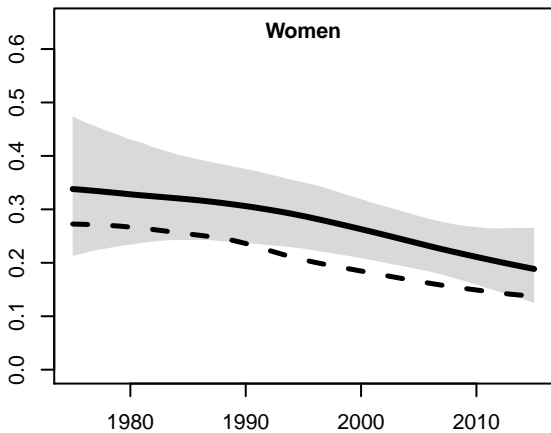

**Kazakhstan**  
Central Asia

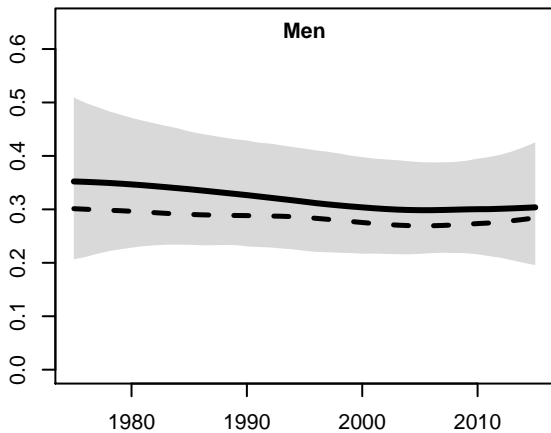

**Kazakhstan**  
Central Asia

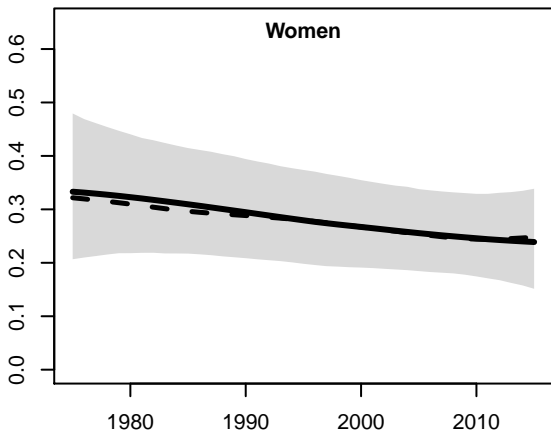

**Kenya**  
East Africa

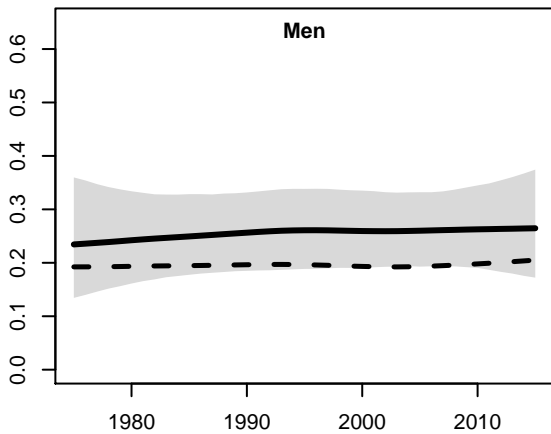

**Kenya**  
East Africa

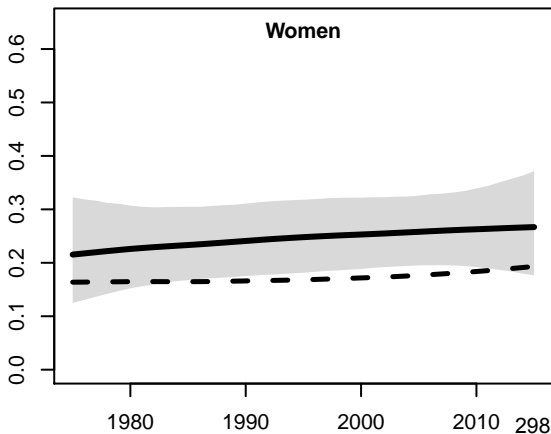

Age-standardised/Crude adult prevalence of raised blood pressure

### Kiribati

Polynesia and Micronesia

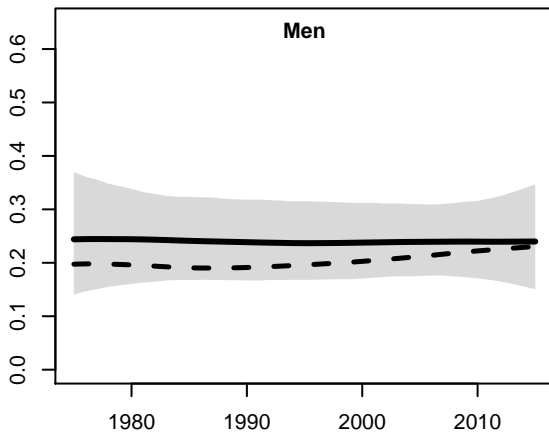

### Kiribati

Polynesia and Micronesia

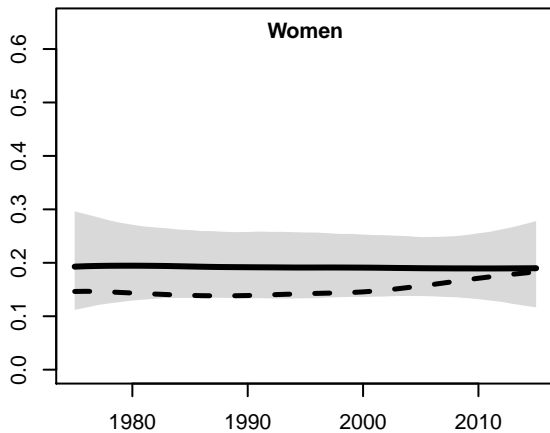

### Kuwait

Middle East and North Africa

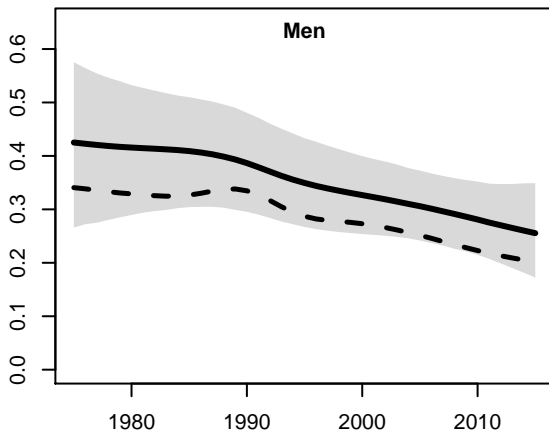

### Kuwait

Middle East and North Africa

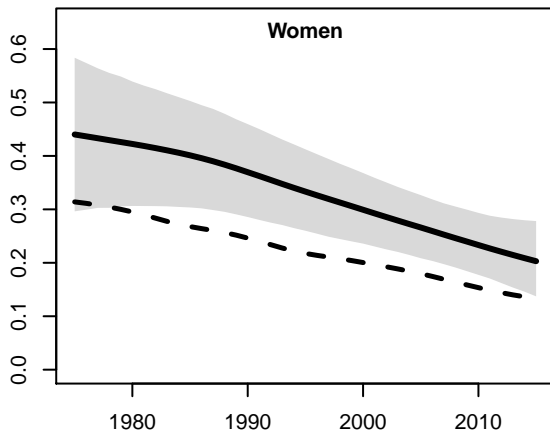

### Kyrgyzstan

Central Asia

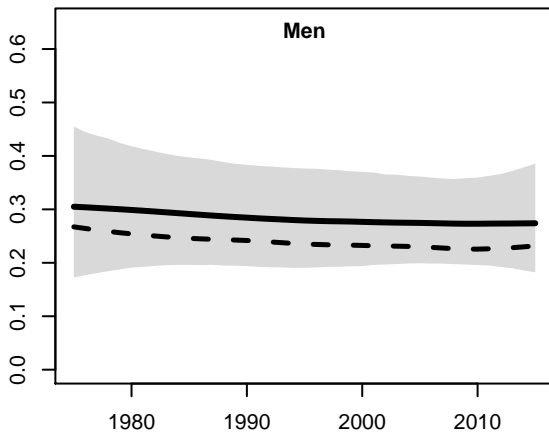

### Kyrgyzstan

Central Asia

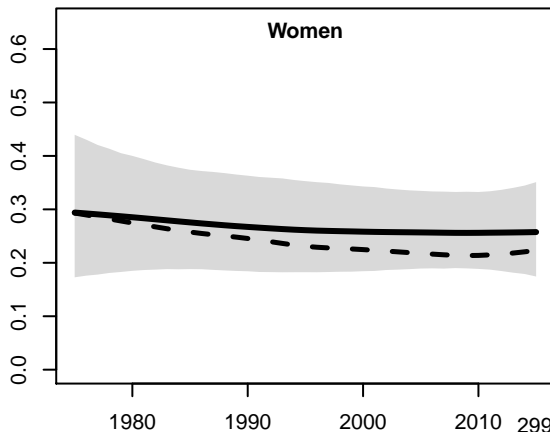

**Lao PDR**  
Southeast Asia

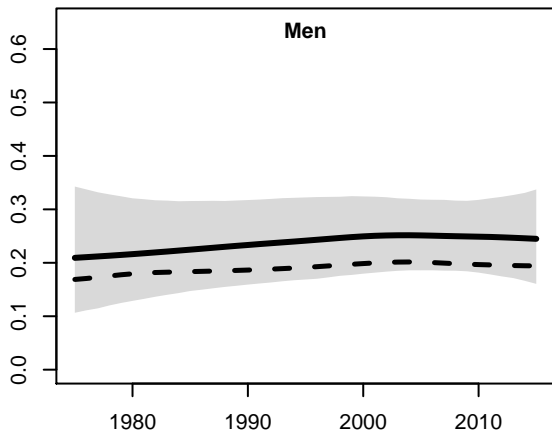

**Lao PDR**  
Southeast Asia

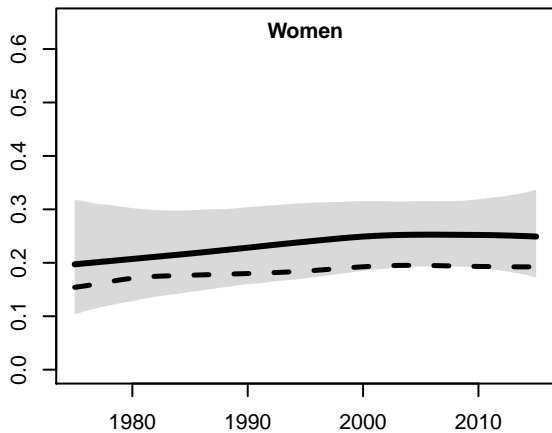

**Latvia**  
Eastern Europe

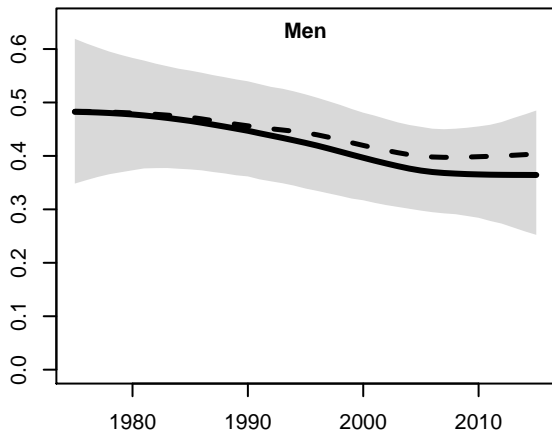

**Latvia**  
Eastern Europe

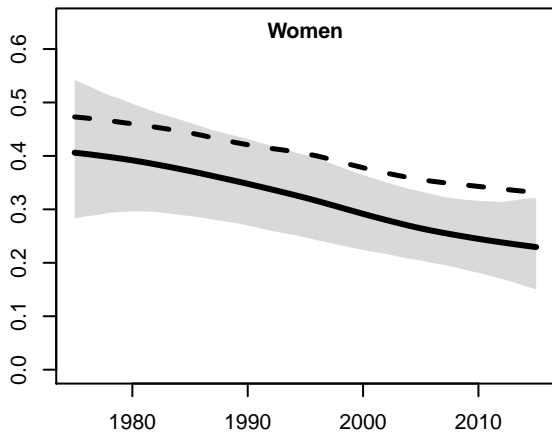

**Lebanon**  
Middle East and North Africa

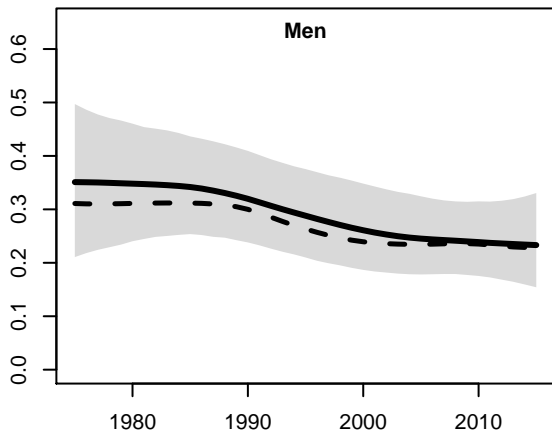

**Lebanon**  
Middle East and North Africa

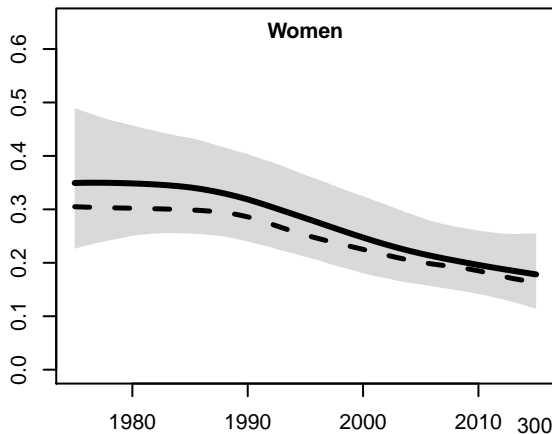

**Lesotho**  
Southern Africa

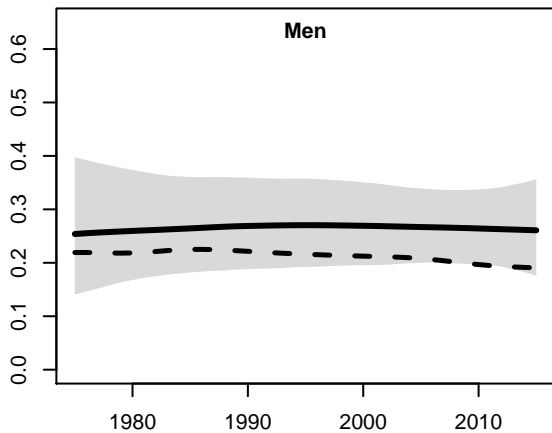

**Lesotho**  
Southern Africa

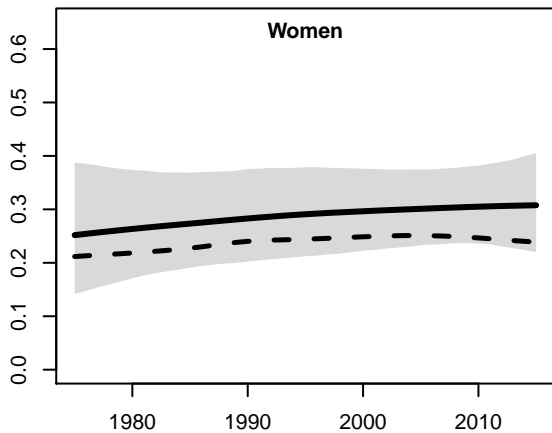

**Liberia**  
West Africa

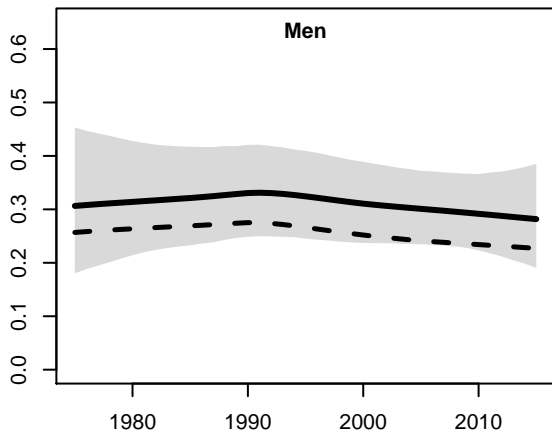

**Liberia**  
West Africa

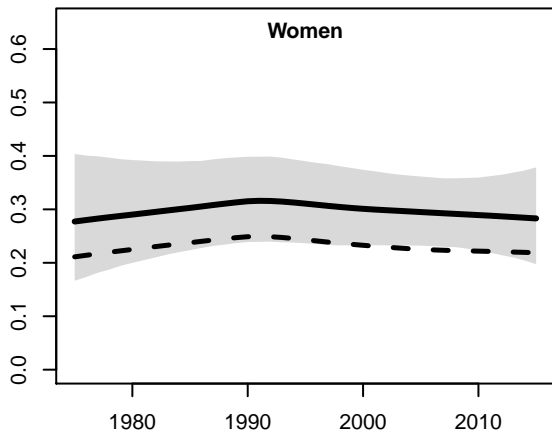

**Libya**  
Middle East and North Africa

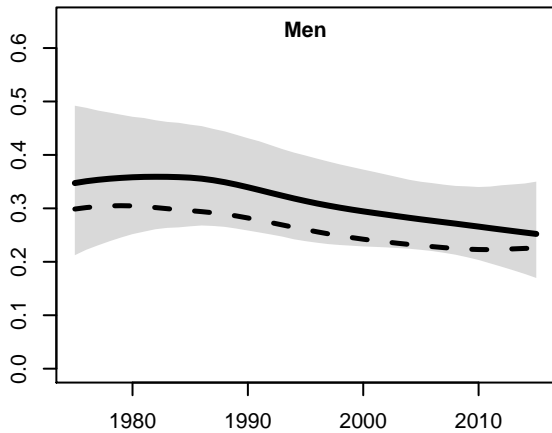

**Libya**  
Middle East and North Africa

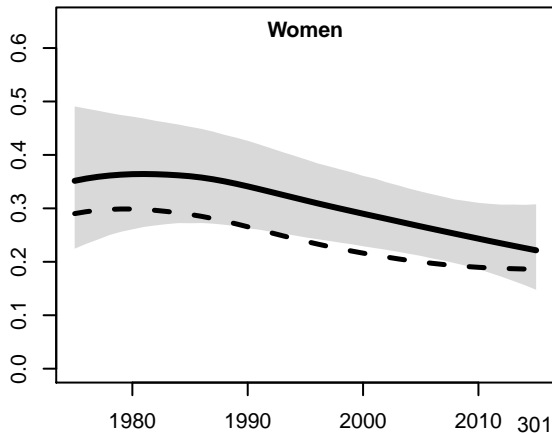

**Lithuania**  
Eastern Europe

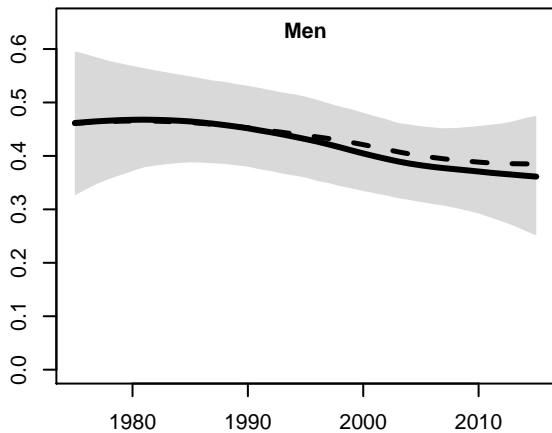

**Lithuania**  
Eastern Europe

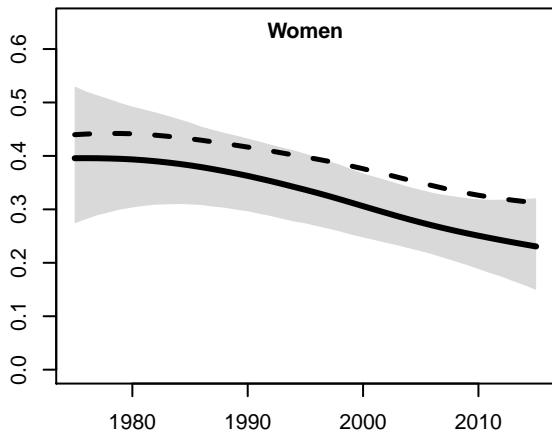

**Luxembourg**  
North Western Europe

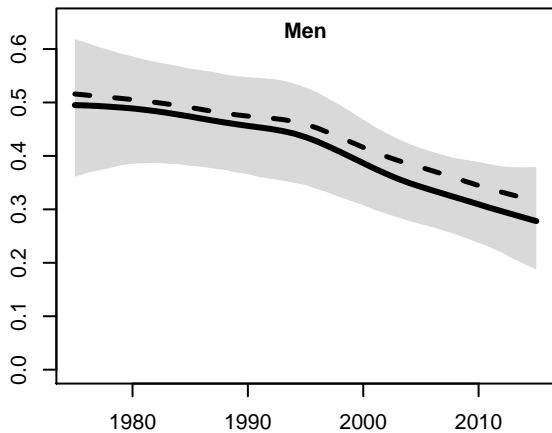

**Luxembourg**  
North Western Europe

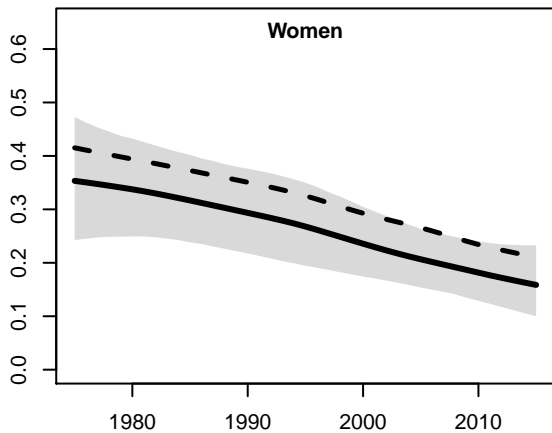

**Macedonia (TFYR)**  
Central Europe

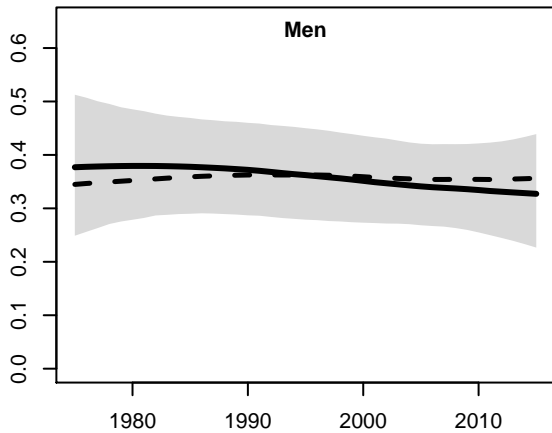

**Macedonia (TFYR)**  
Central Europe

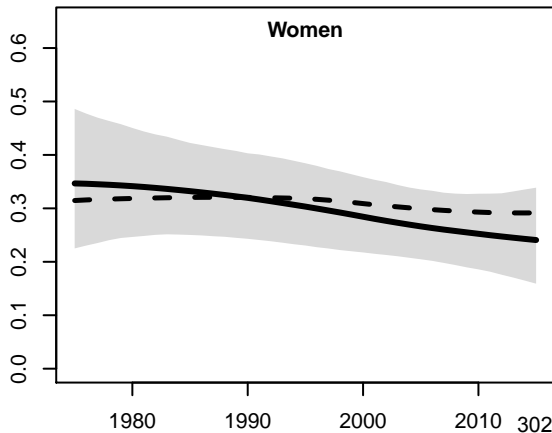



**Madagascar**

East Africa

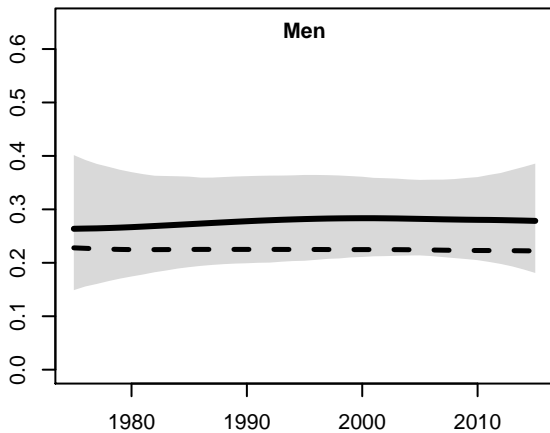**Madagascar**

East Africa

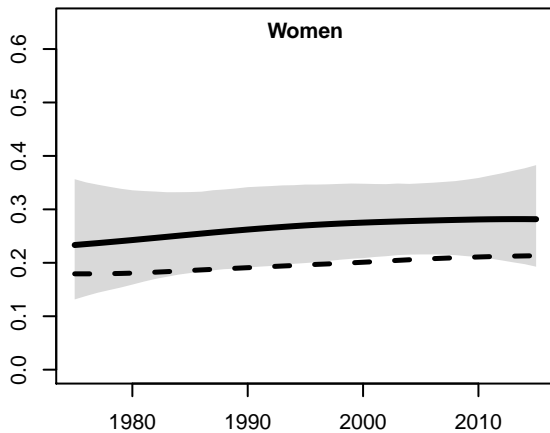**Malawi**

East Africa

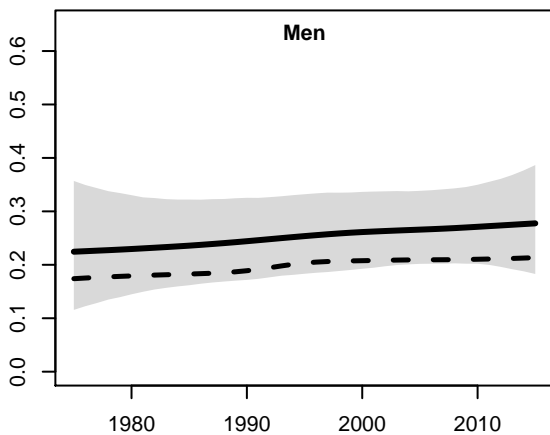**Malawi**

East Africa

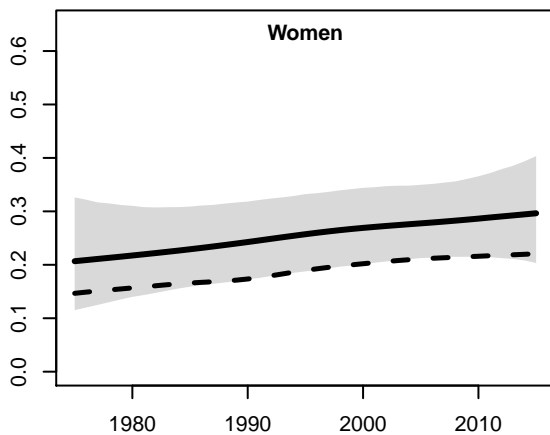**Malaysia**

Southeast Asia

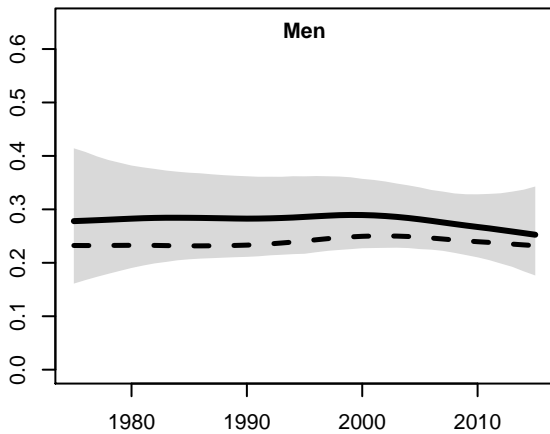**Malaysia**

Southeast Asia

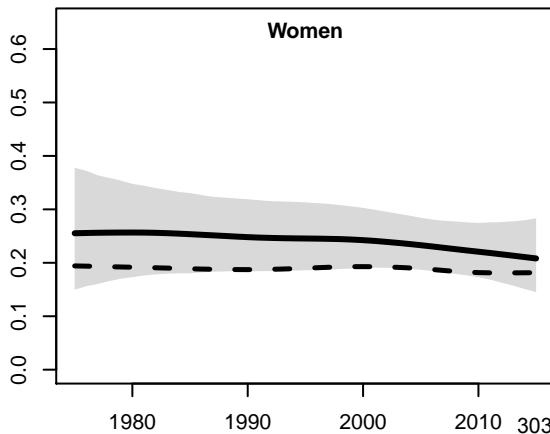

Age-standardised/Crude adult prevalence of raised blood pressure

**Maldives**

Southeast Asia

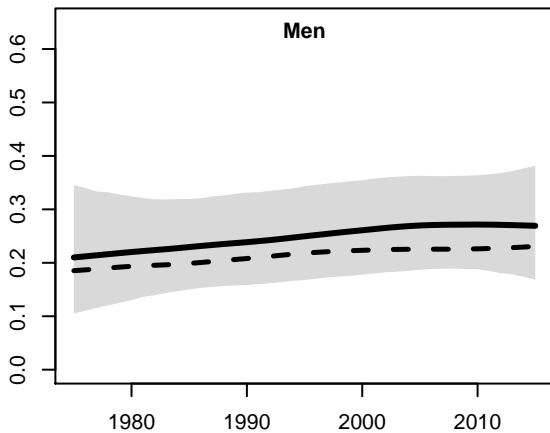**Maldives**

Southeast Asia

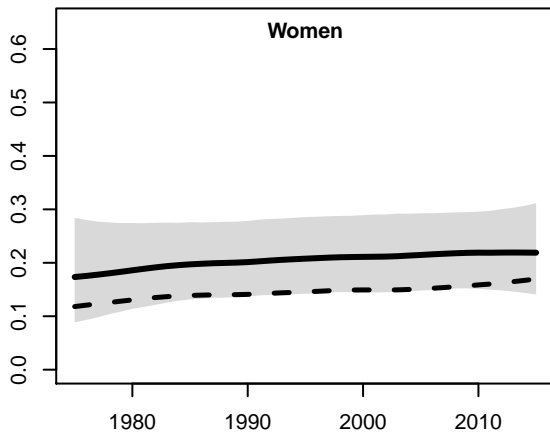**Mali**

West Africa

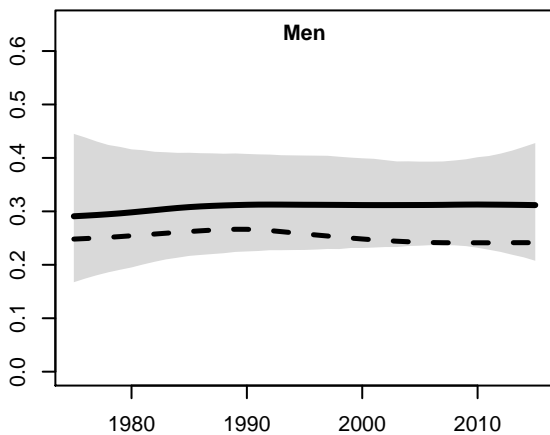**Mali**

West Africa

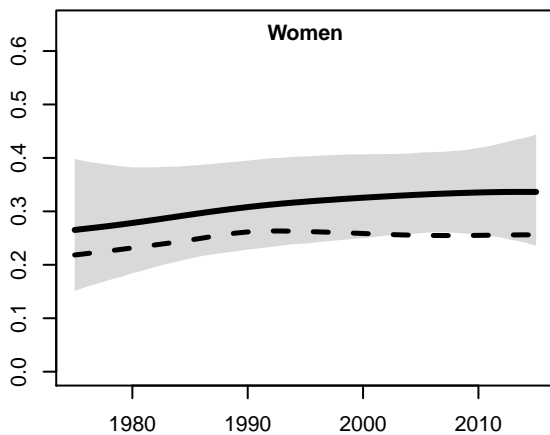**Malta**

South Western Europe

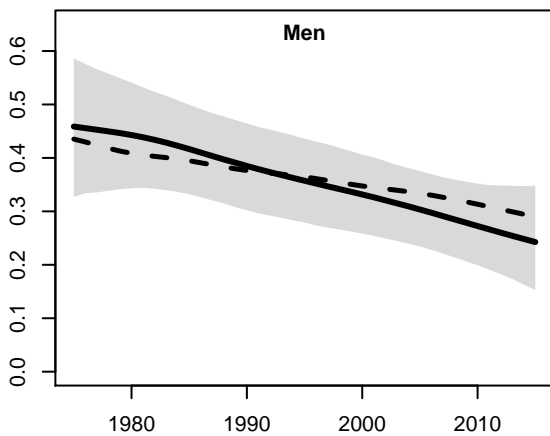**Malta**

South Western Europe

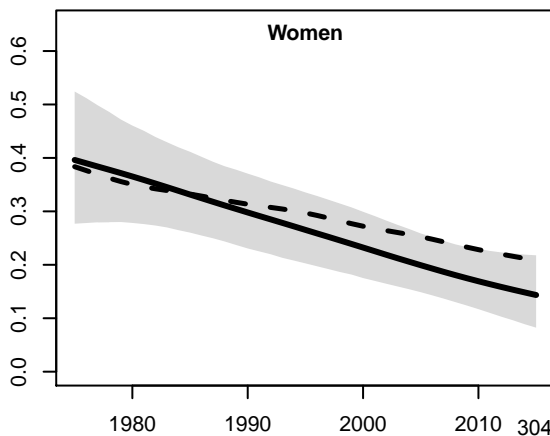

Age-standardised/Crude adult prevalence of raised blood pressure

**Marshall Islands**  
Polynesia and Micronesia

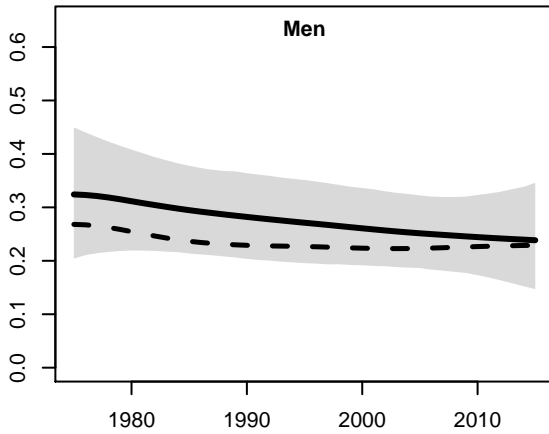

**Marshall Islands**  
Polynesia and Micronesia

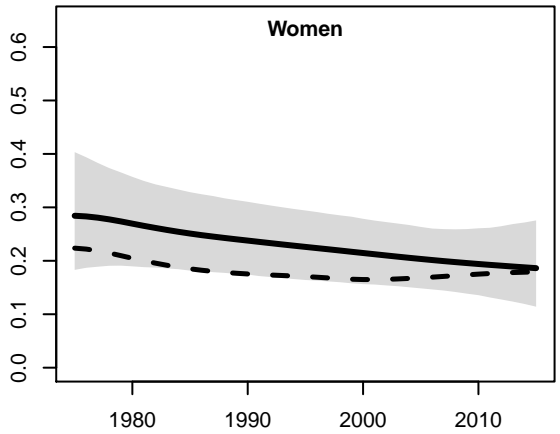

**Mauritania**  
West Africa

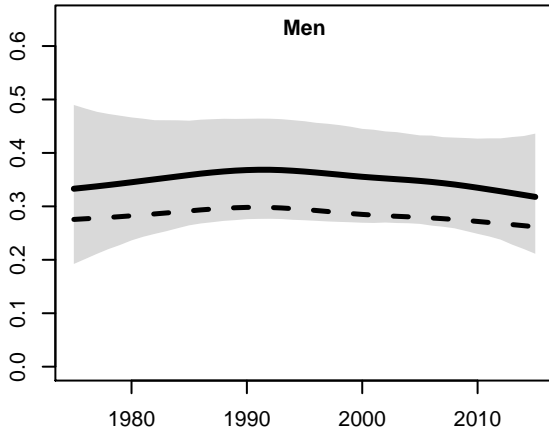

**Mauritania**  
West Africa

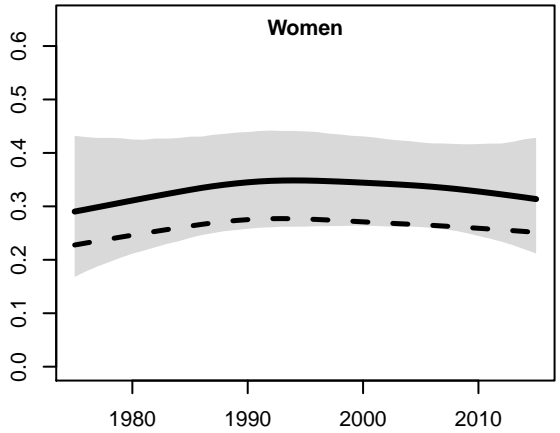

**Mauritius**  
East Africa

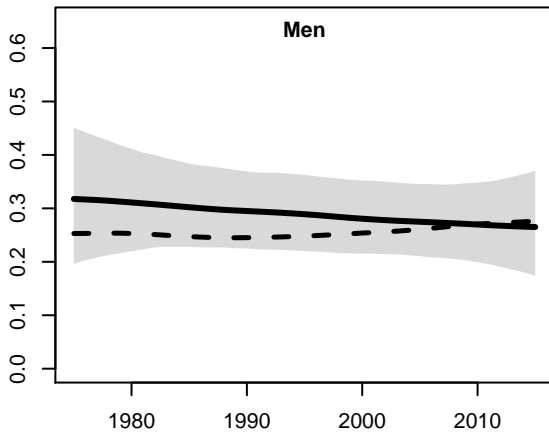

**Mauritius**  
East Africa

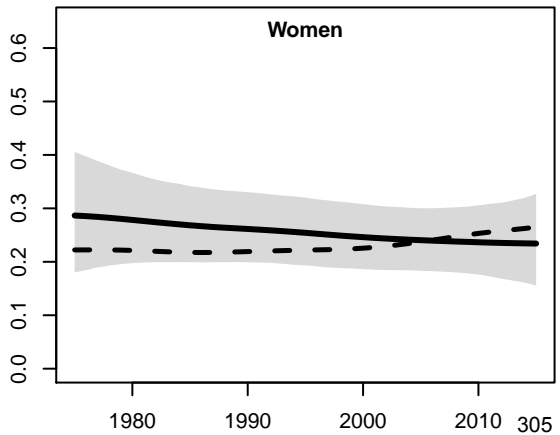

Age-standardised/Crude adult prevalence of raised blood pressure

**Mexico**  
Central Latin America

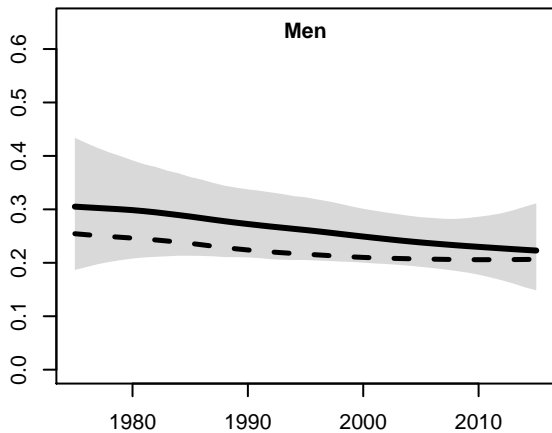

**Mexico**  
Central Latin America

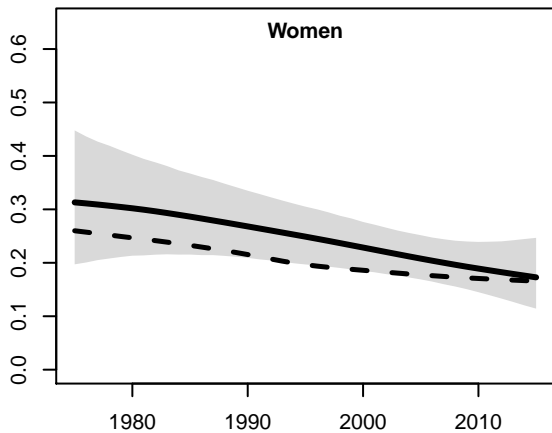

**Micronesia (Federated States of)**  
Polynesia and Micronesia

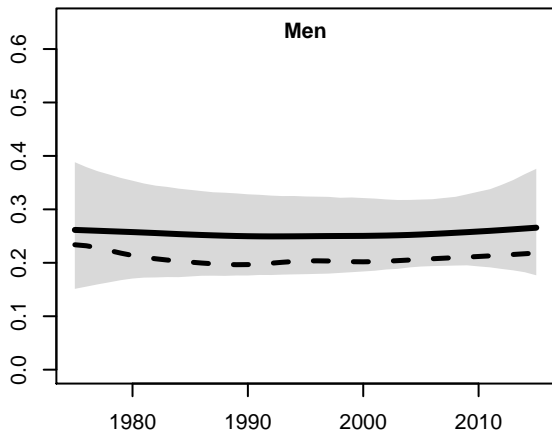

**Micronesia (Federated States of)**  
Polynesia and Micronesia

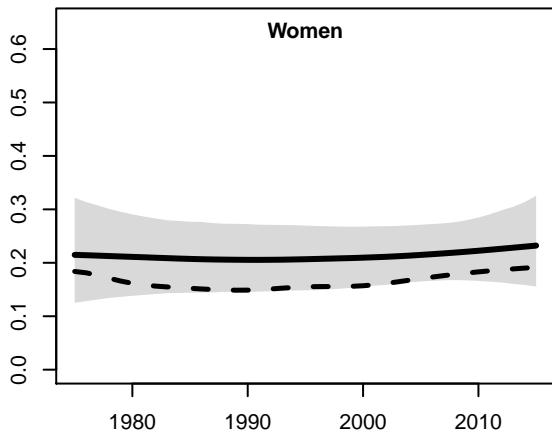

**Moldova**  
Eastern Europe

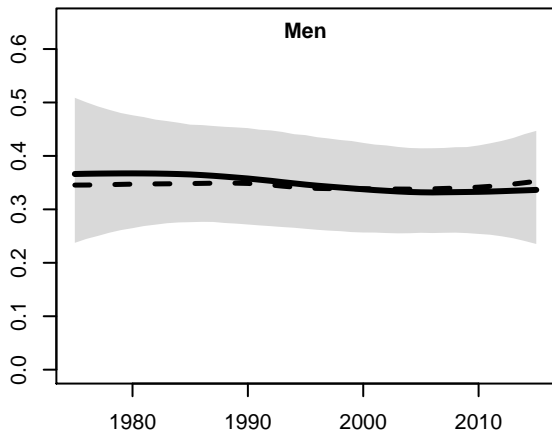

**Moldova**  
Eastern Europe

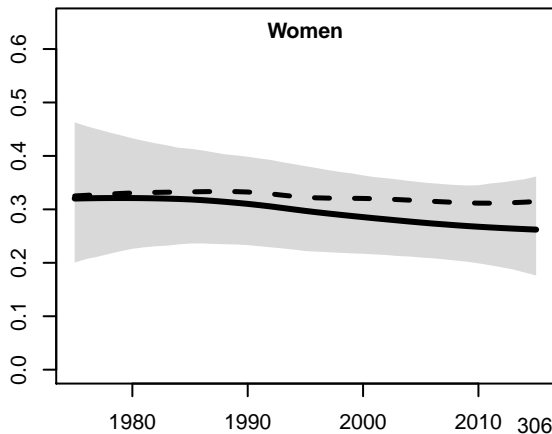

Age-standardised/Crude adult prevalence of raised blood pressure

**Mongolia**  
Central Asia

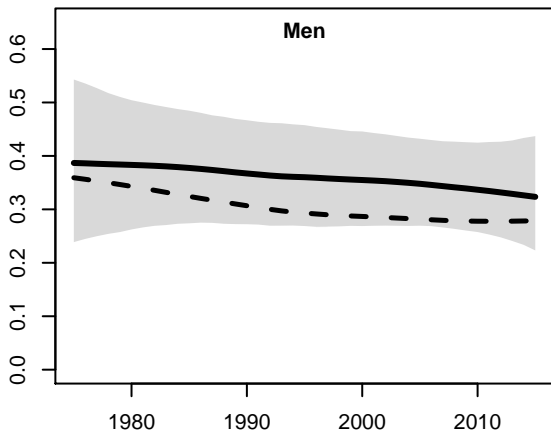

**Mongolia**  
Central Asia

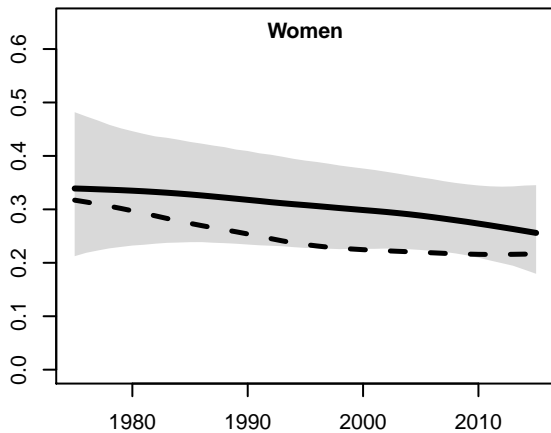

**Montenegro**  
Central Europe

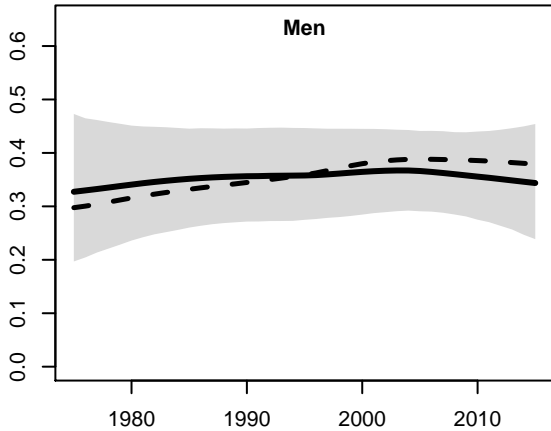

**Montenegro**  
Central Europe

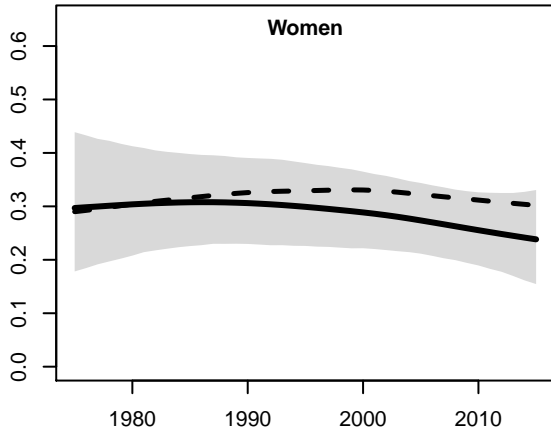

**Morocco**  
Middle East and North Africa

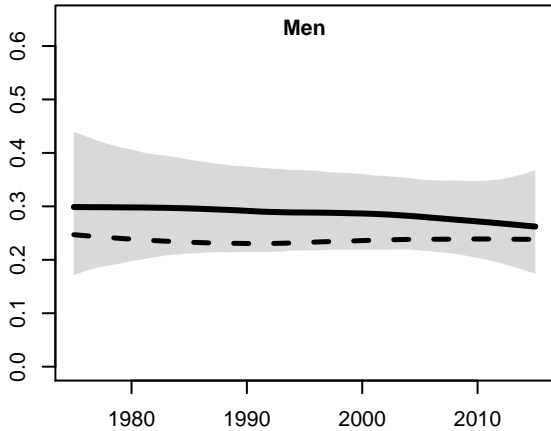

**Morocco**  
Middle East and North Africa

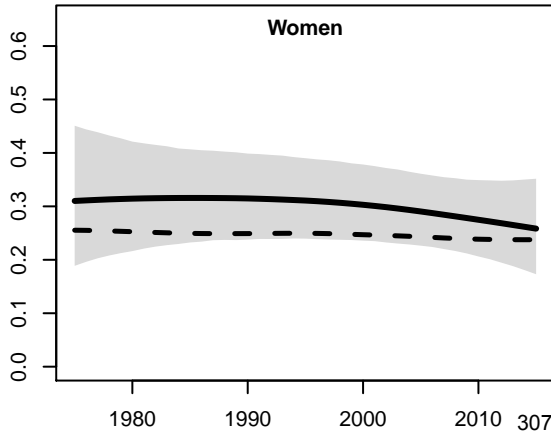

**Mozambique**  
East Africa

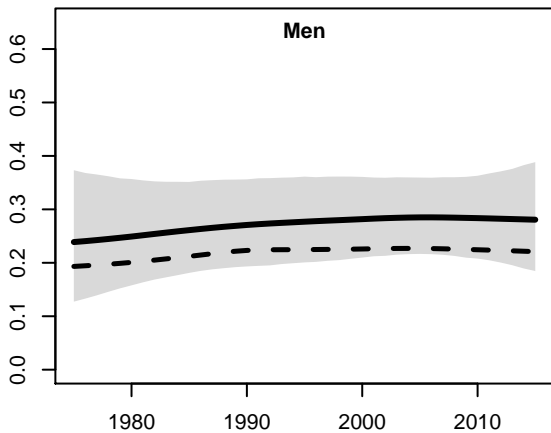

**Mozambique**  
East Africa

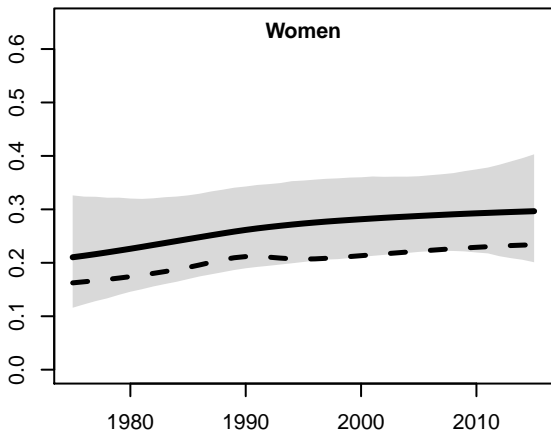

**Myanmar**  
Southeast Asia

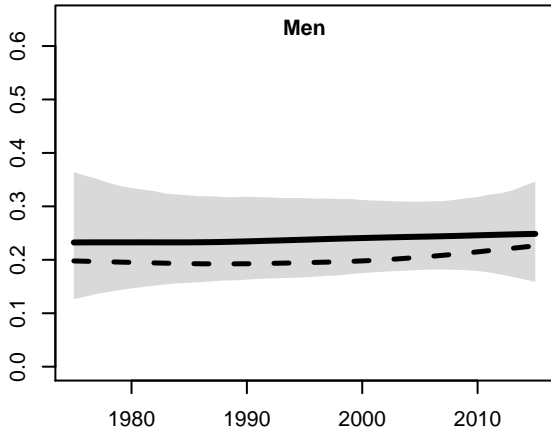

**Myanmar**  
Southeast Asia

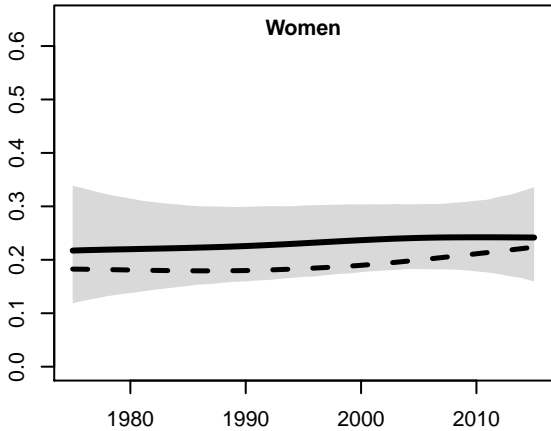

**Namibia**  
Southern Africa

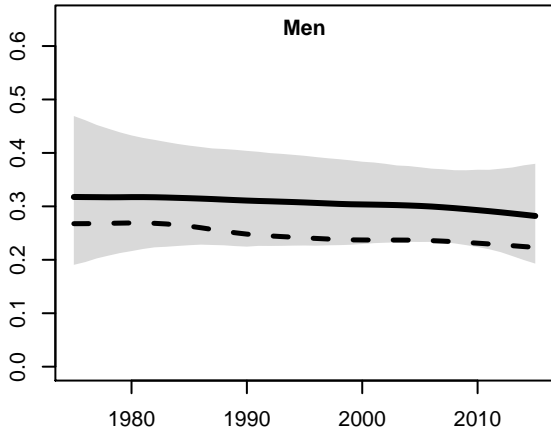

**Namibia**  
Southern Africa

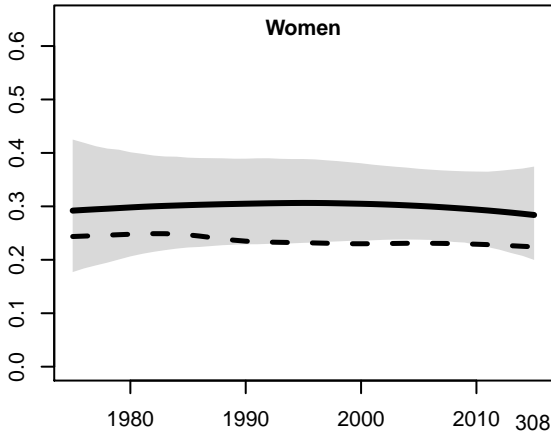

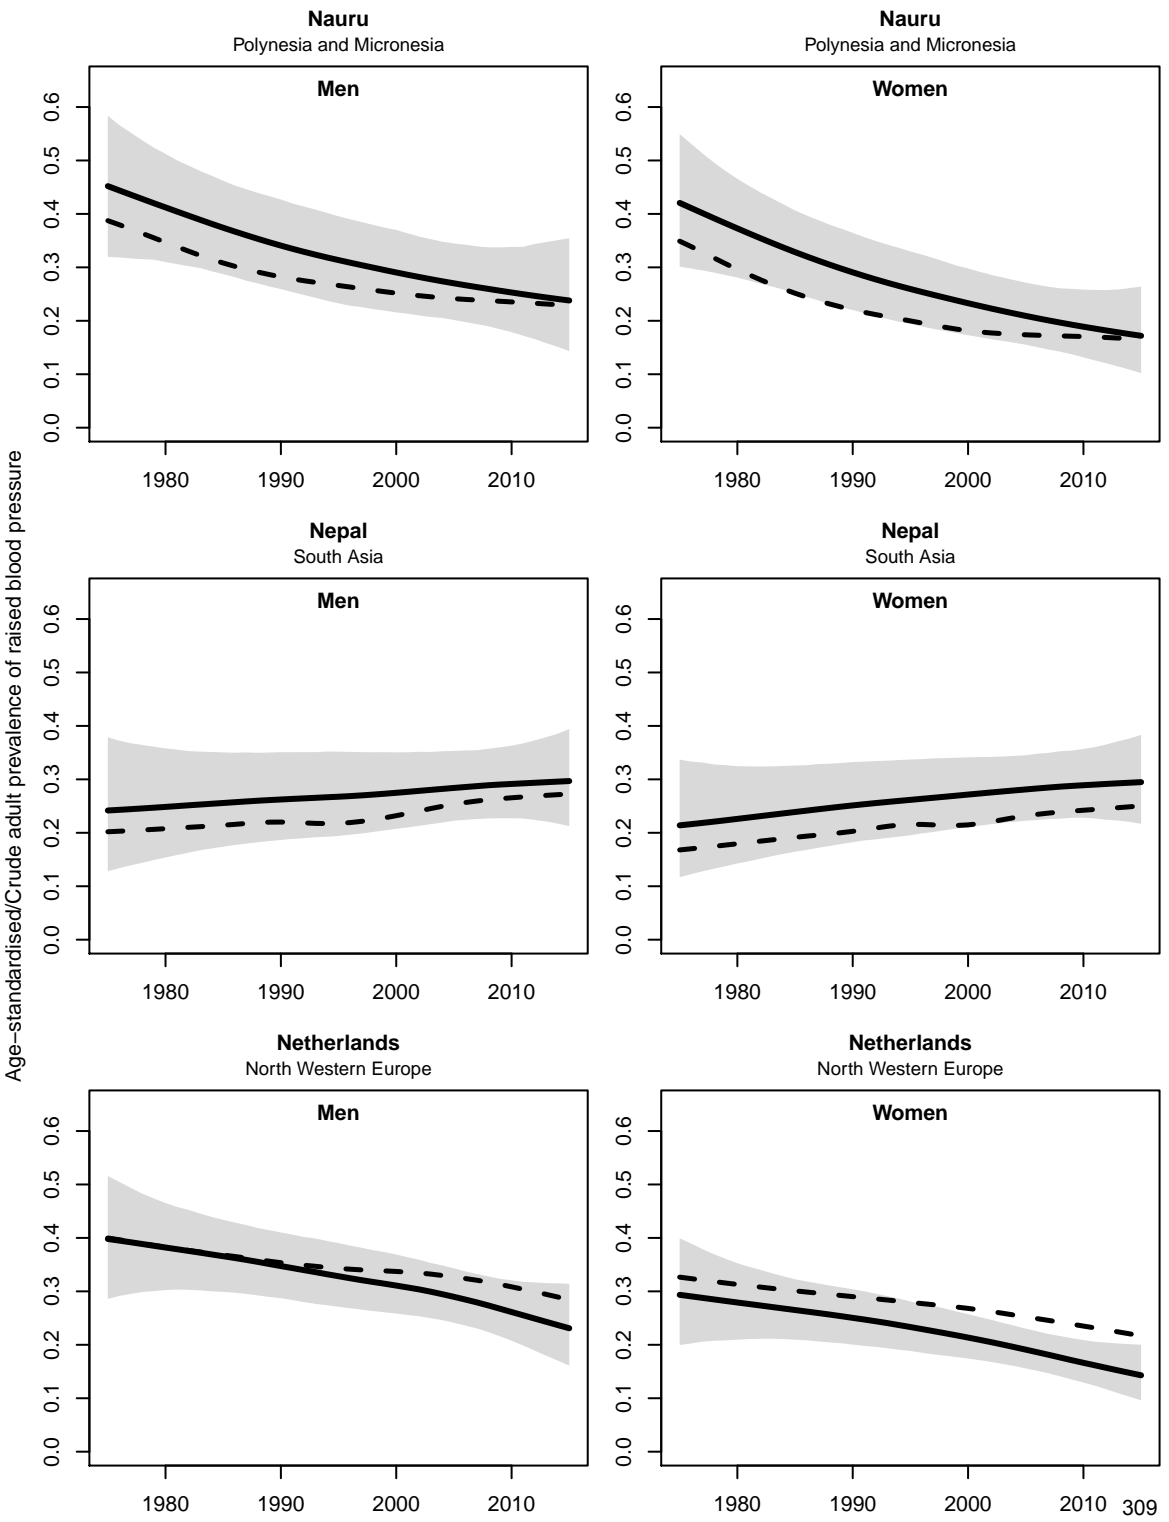

**New Zealand**  
High-income English-speaking countries

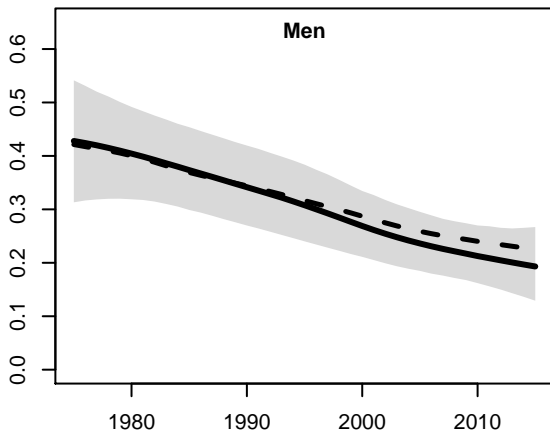

**New Zealand**  
High-income English-speaking countries

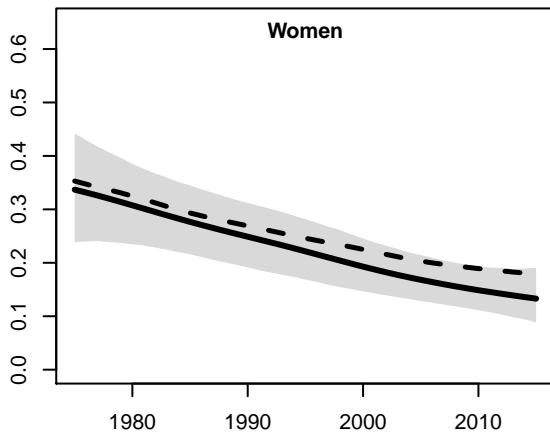

**Nicaragua**  
Central Latin America

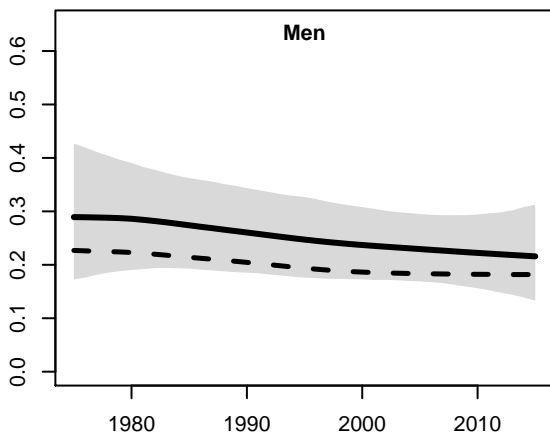

**Nicaragua**  
Central Latin America

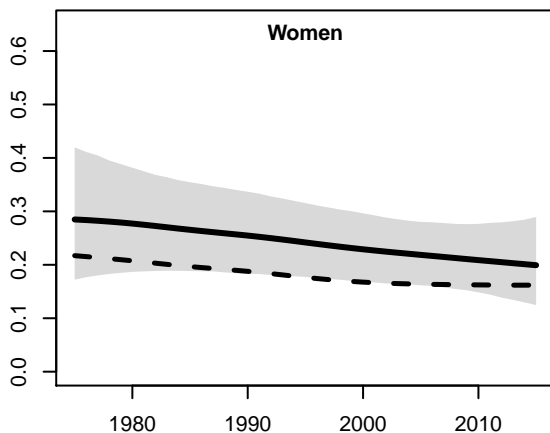

**Niger**  
West Africa

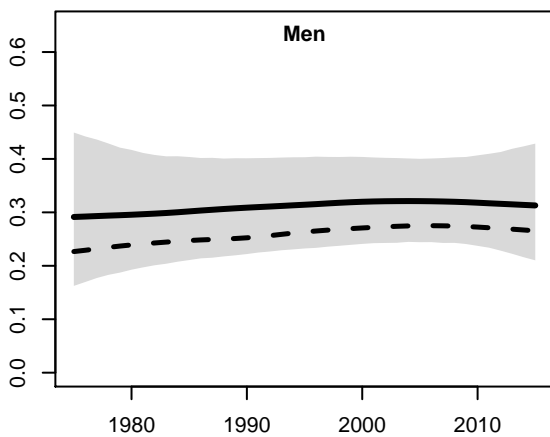

**Niger**  
West Africa

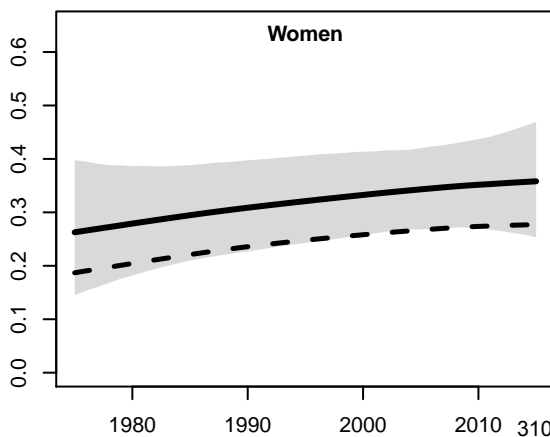



**Nigeria**  
West Africa

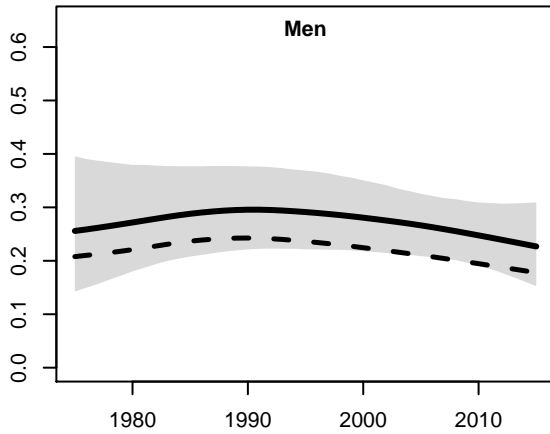

**Nigeria**  
West Africa

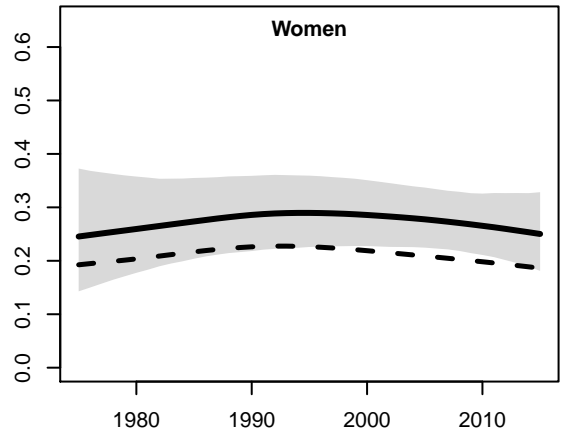

**Niue**  
Polynesia and Micronesia

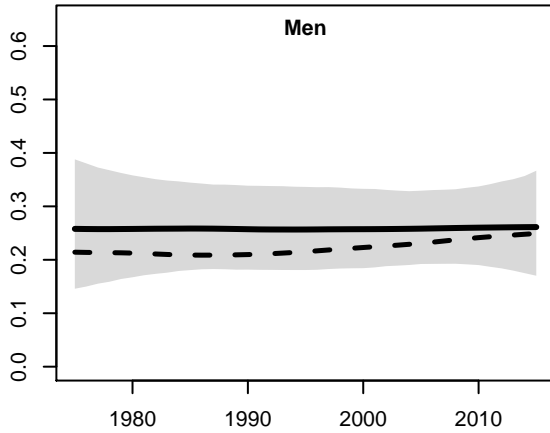

**Niue**  
Polynesia and Micronesia

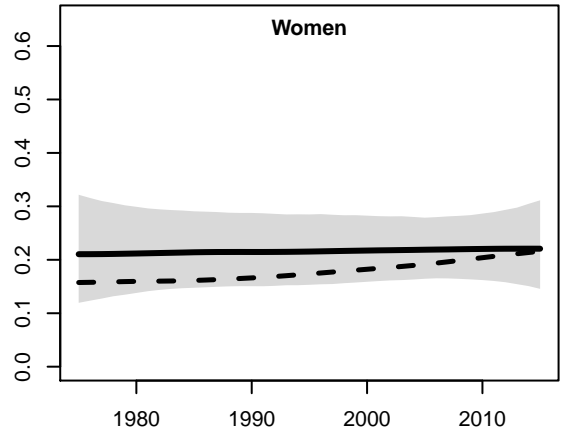

**North Korea**  
East Asia

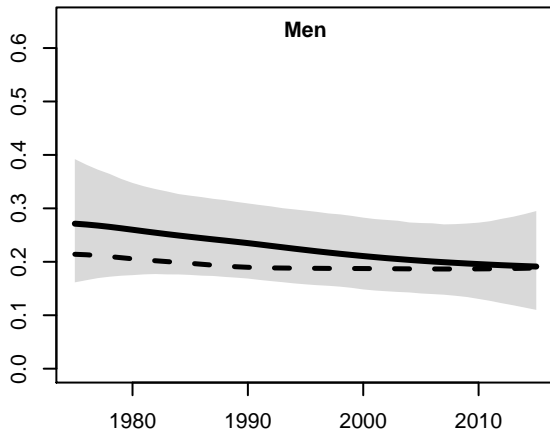

**North Korea**  
East Asia

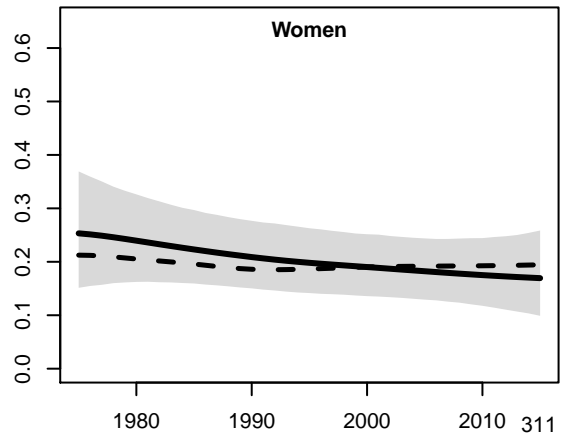

Age-standardised/Crude adult prevalence of raised blood pressure

**Norway**  
North Western Europe

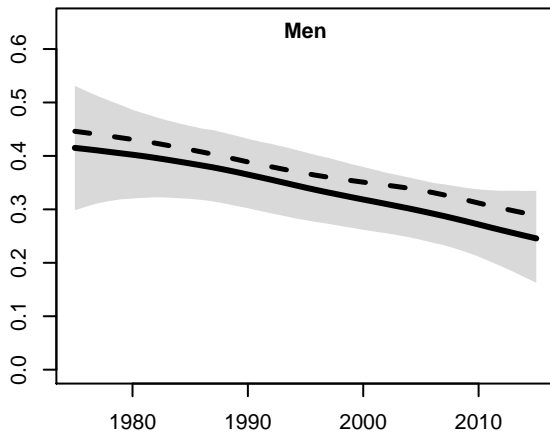

**Norway**  
North Western Europe

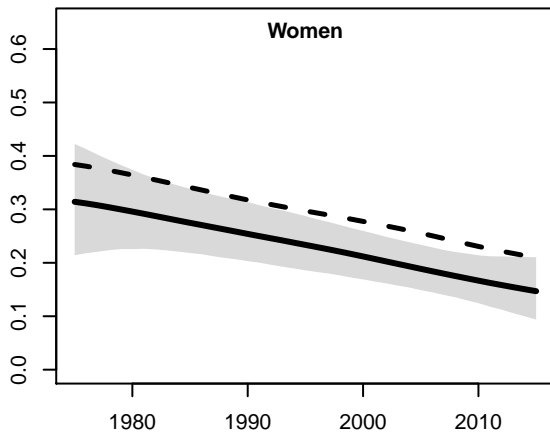

**Occupied Palestinian Territory**  
Middle East and North Africa

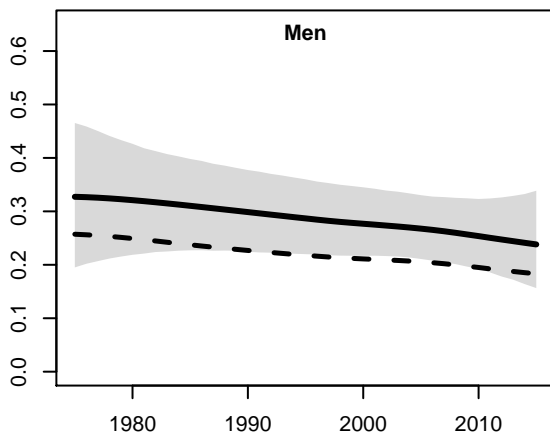

**Occupied Palestinian Territory**  
Middle East and North Africa

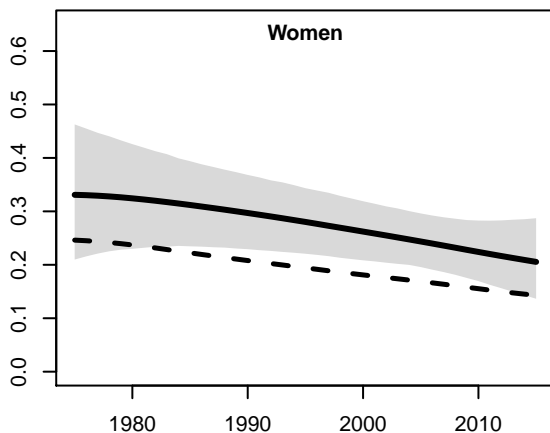

**Oman**  
Middle East and North Africa

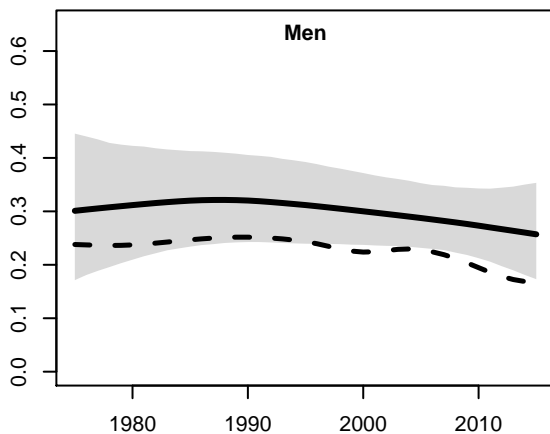

**Oman**  
Middle East and North Africa

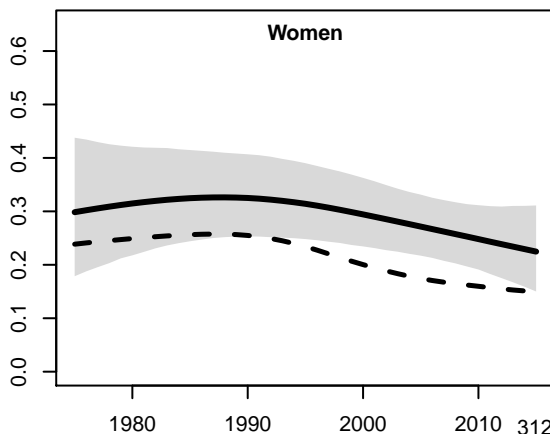

**Pakistan**  
South Asia

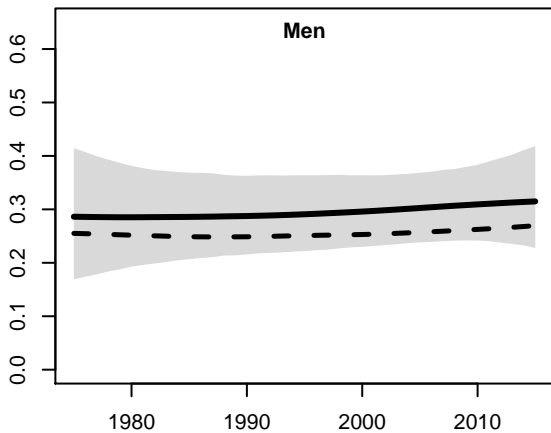

**Pakistan**  
South Asia

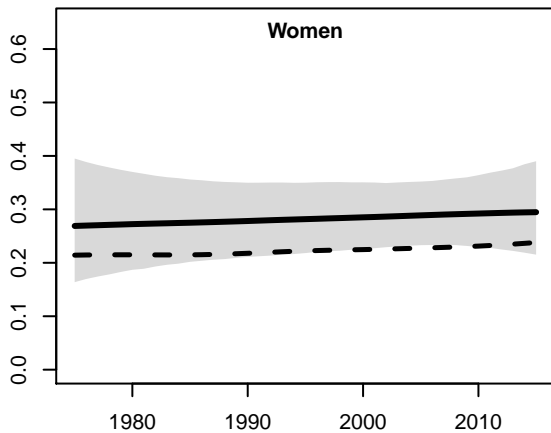

**Palau**  
Polynesia and Micronesia

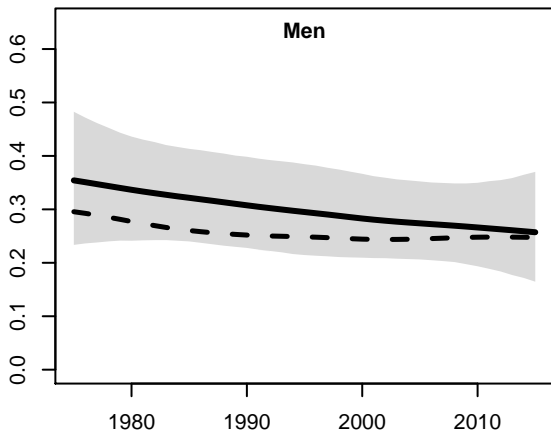

**Palau**  
Polynesia and Micronesia

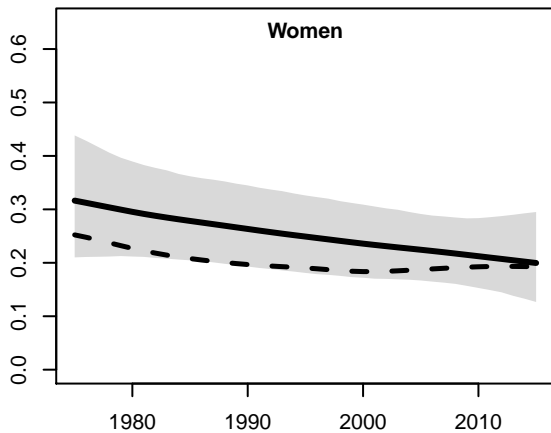

**Panama**  
Central Latin America

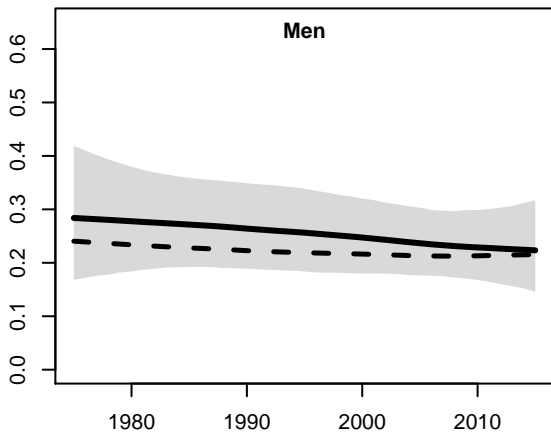

**Panama**  
Central Latin America

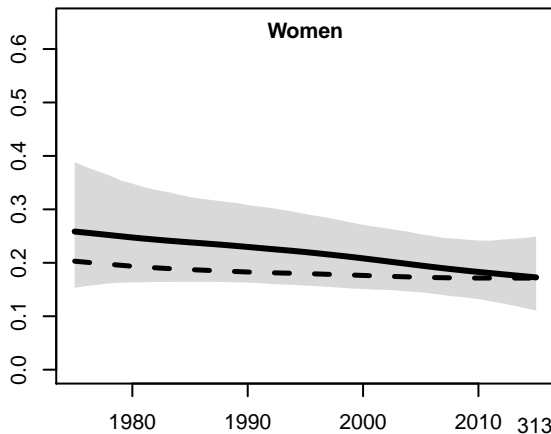

Age-standardised/Crude adult prevalence of raised blood pressure

**Papua New Guinea**  
Melanesia

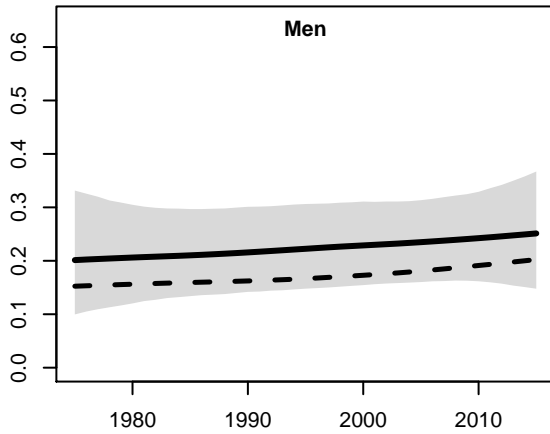

**Papua New Guinea**  
Melanesia

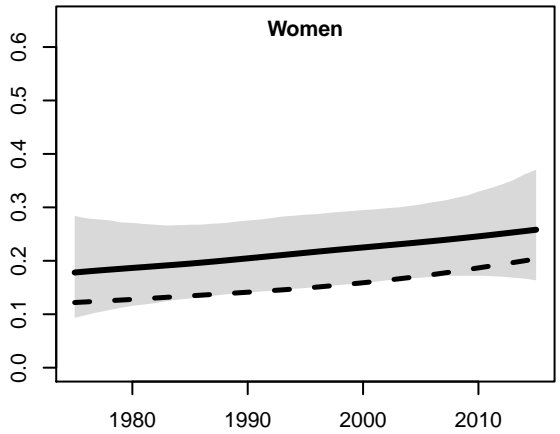

**Paraguay**  
Southern and Tropical Latin America

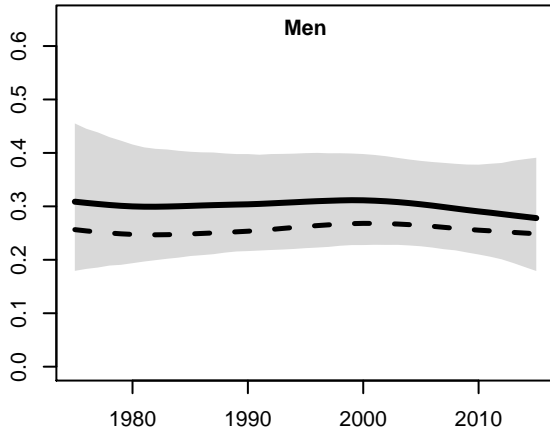

**Paraguay**  
Southern and Tropical Latin America

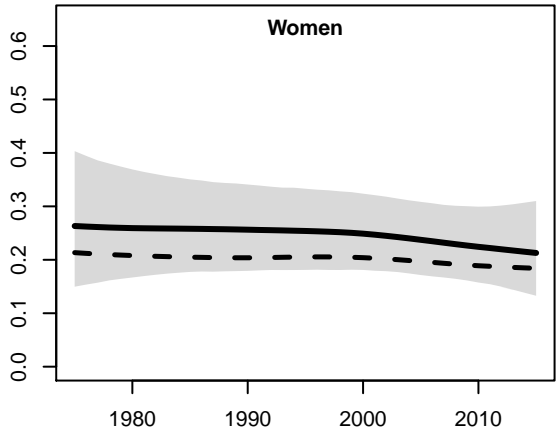

**Peru**  
Andean Latin America

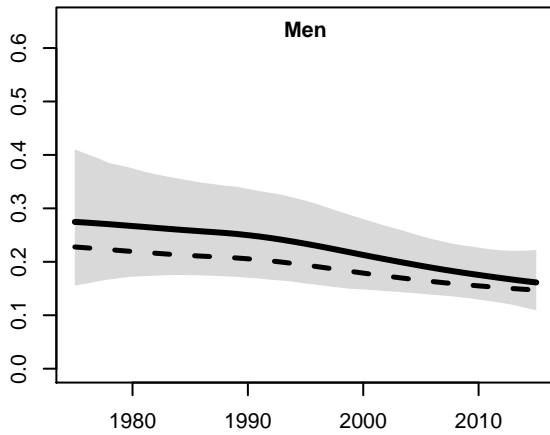

**Peru**  
Andean Latin America

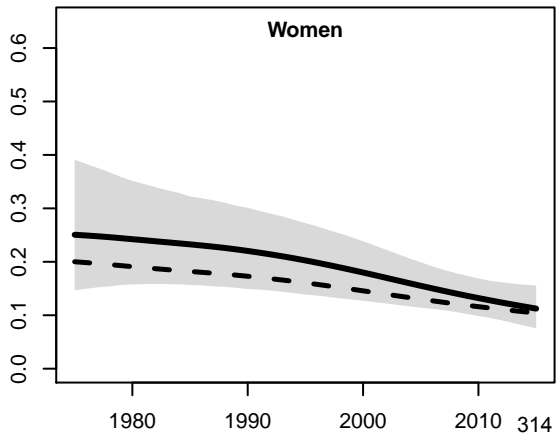

Age-standardised/Crude adult prevalence of raised blood pressure

**Philippines**  
Southeast Asia

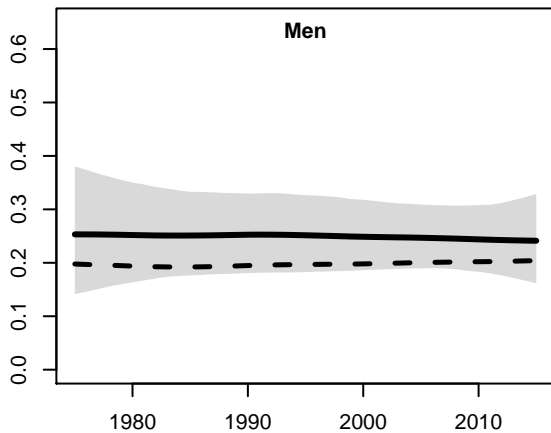

**Philippines**  
Southeast Asia

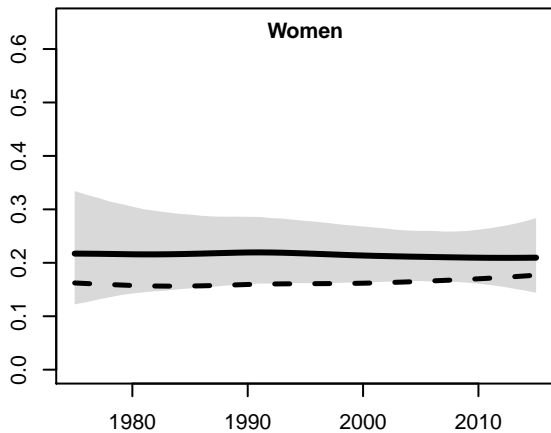

**Poland**  
Central Europe

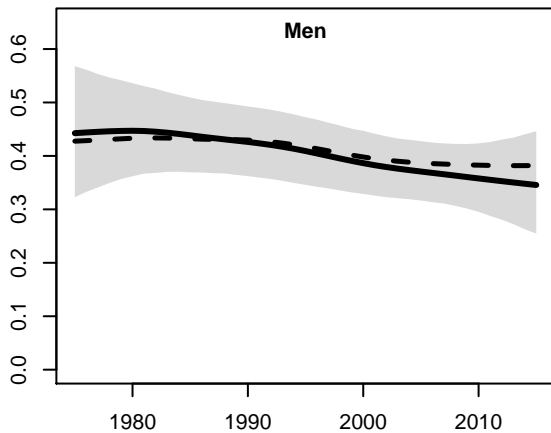

**Poland**  
Central Europe

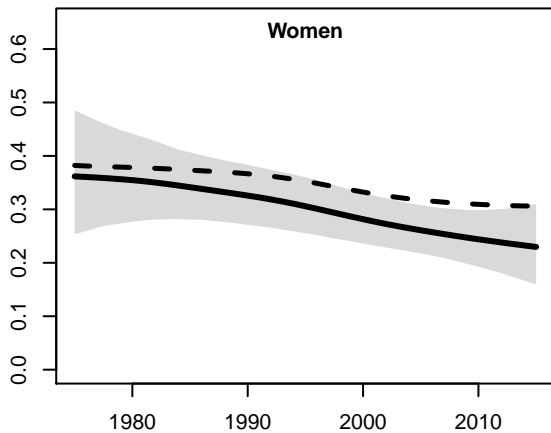

**Portugal**  
South Western Europe

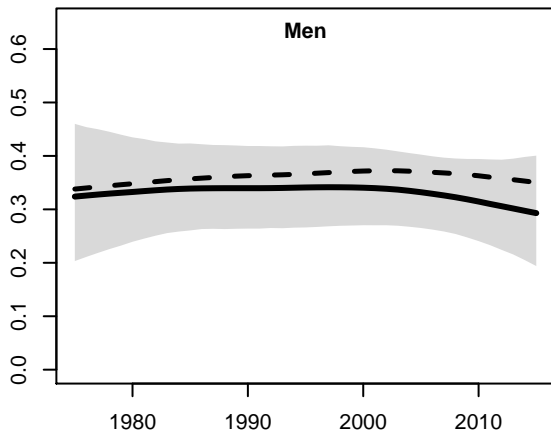

**Portugal**  
South Western Europe

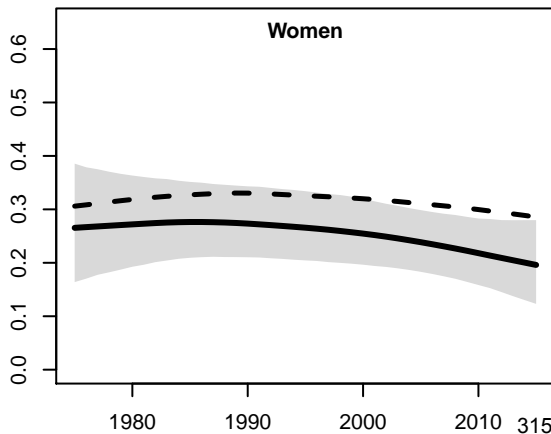

Age-standardised/Crude adult prevalence of raised blood pressure

**Puerto Rico**

Caribbean

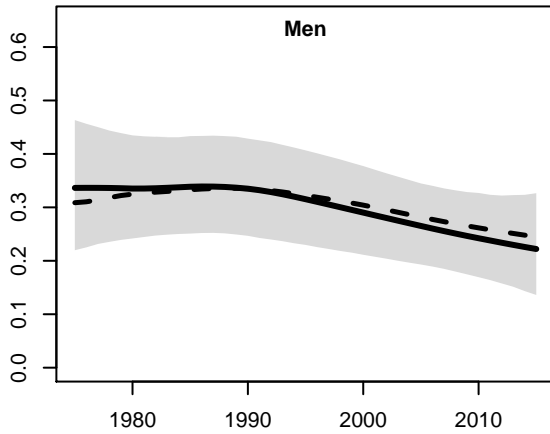

**Puerto Rico**

Caribbean

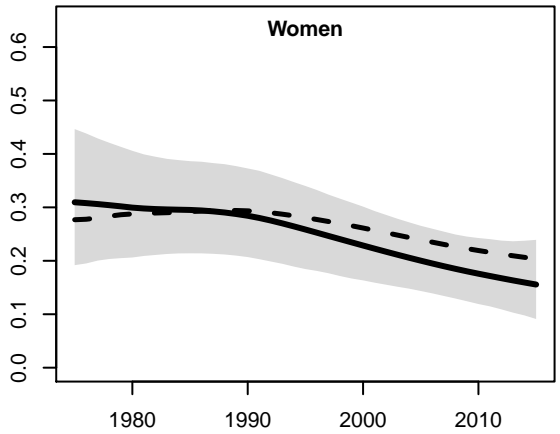

**Qatar**

Middle East and North Africa

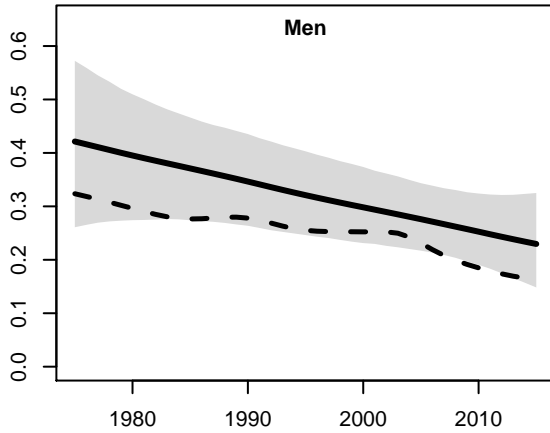

**Qatar**

Middle East and North Africa

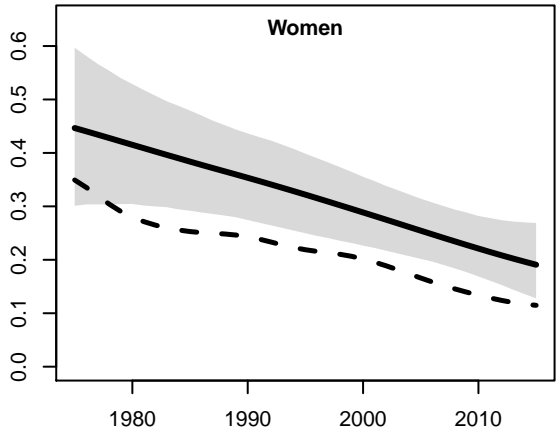

**Romania**

Central Europe

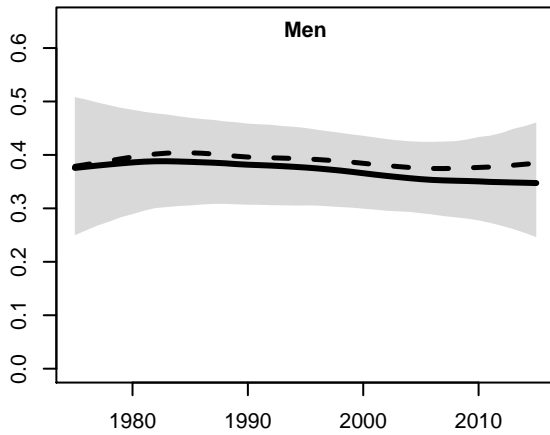

**Romania**

Central Europe

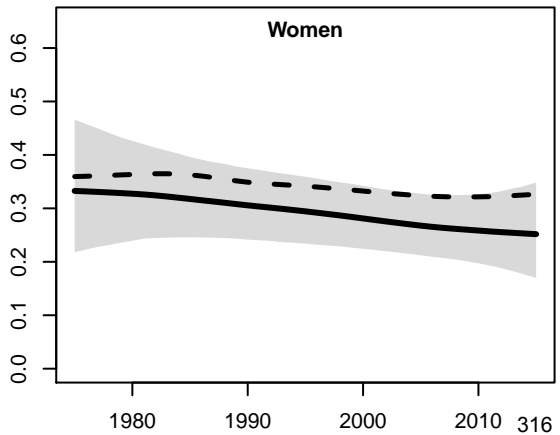

Age-standardised/Crude adult prevalence of raised blood pressure

### Russian Federation

Eastern Europe

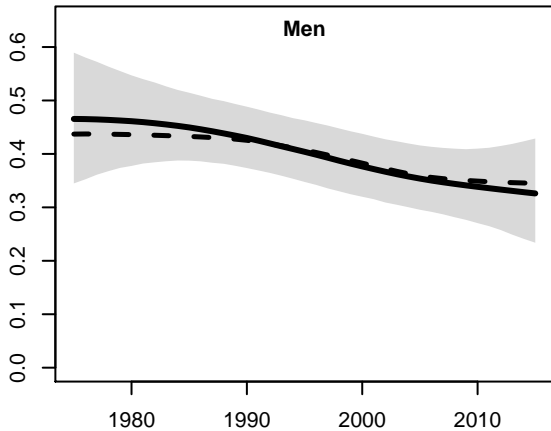

### Russian Federation

Eastern Europe

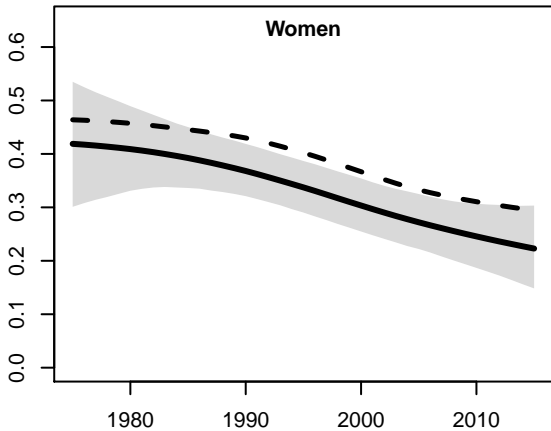

### Rwanda

East Africa

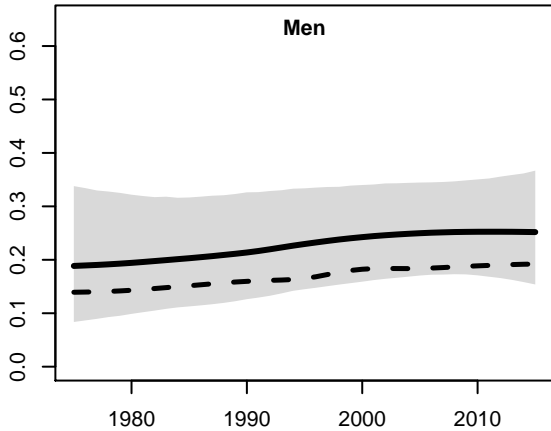

### Rwanda

East Africa

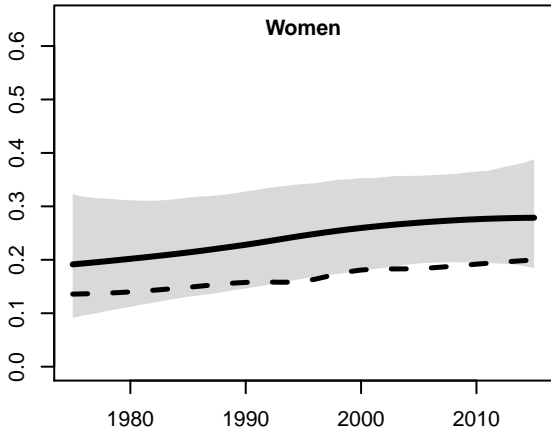

### Saint Kitts and Nevis

Caribbean

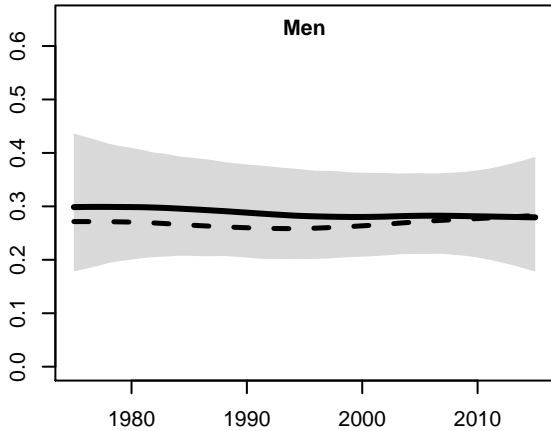

### Saint Kitts and Nevis

Caribbean

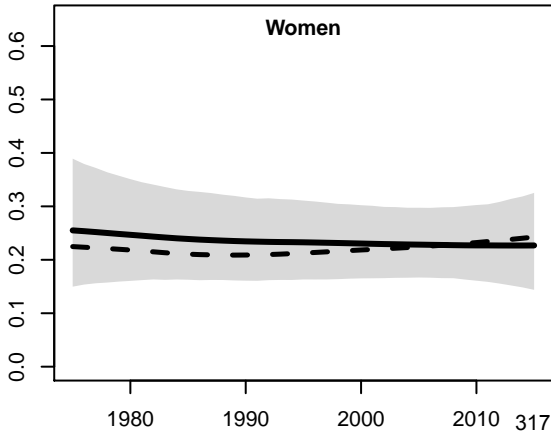

Age-standardised/Crude adult prevalence of raised blood pressure

### Saint Lucia

Caribbean

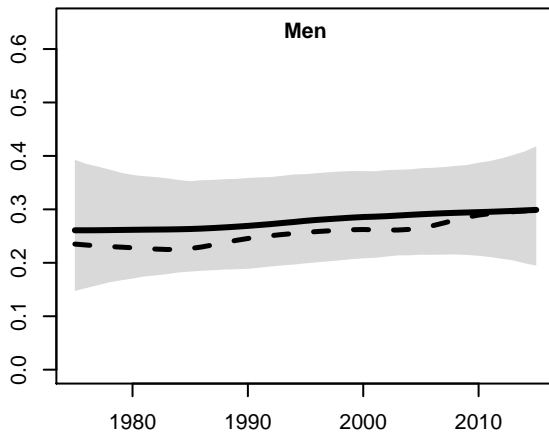

### Saint Lucia

Caribbean

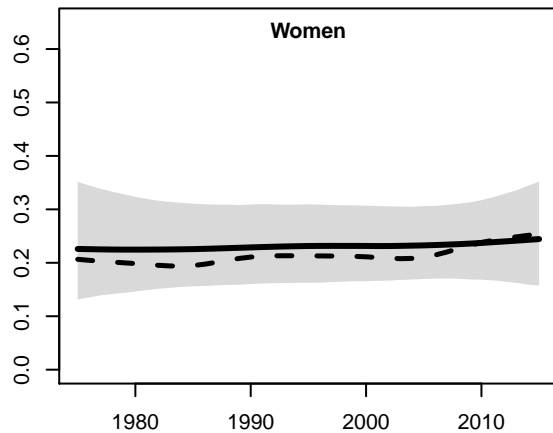

### Saint Vincent and the Grenadines

Caribbean

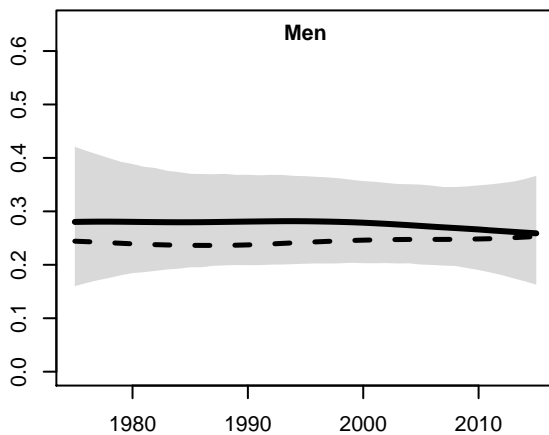

### Saint Vincent and the Grenadines

Caribbean

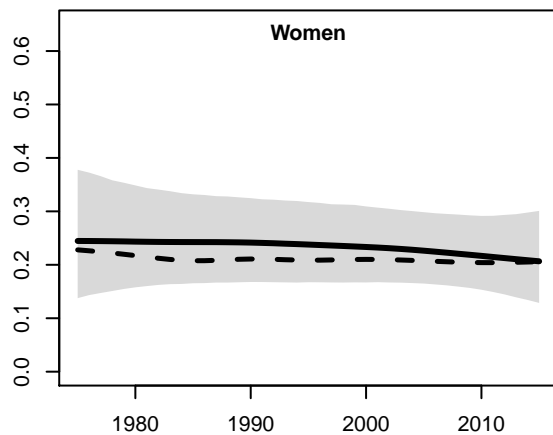

### Samoa

Polynesia and Micronesia

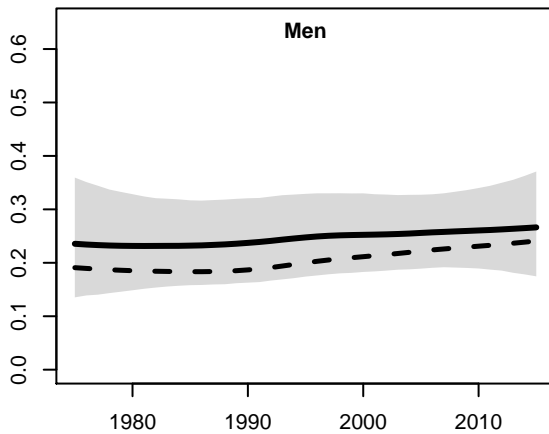

### Samoa

Polynesia and Micronesia

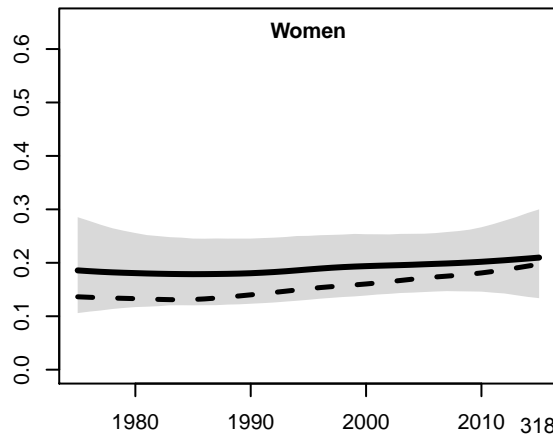



### Sao Tome and Principe

West Africa

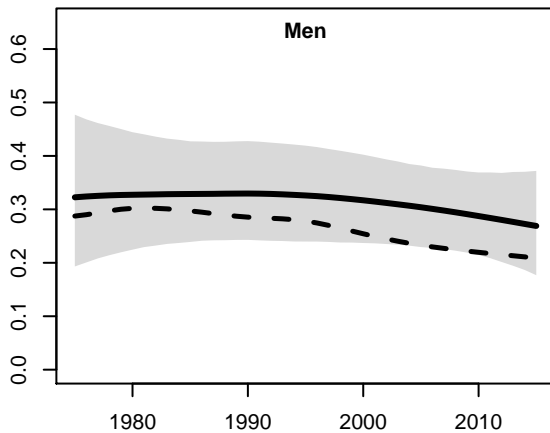

### Sao Tome and Principe

West Africa

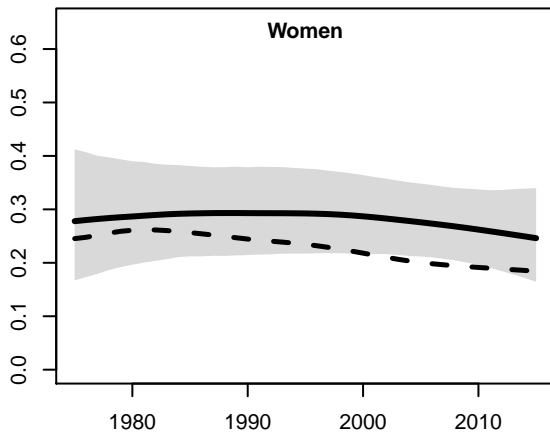

### Saudi Arabia

Middle East and North Africa

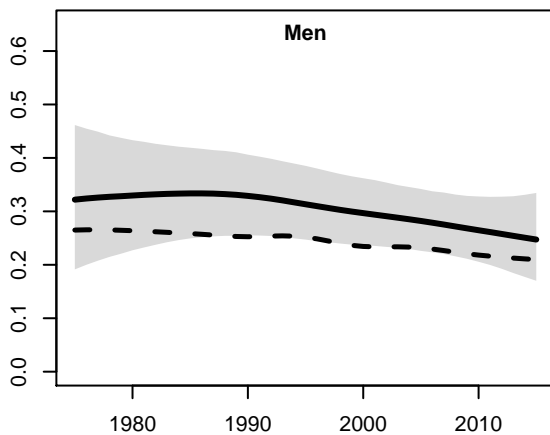

### Saudi Arabia

Middle East and North Africa

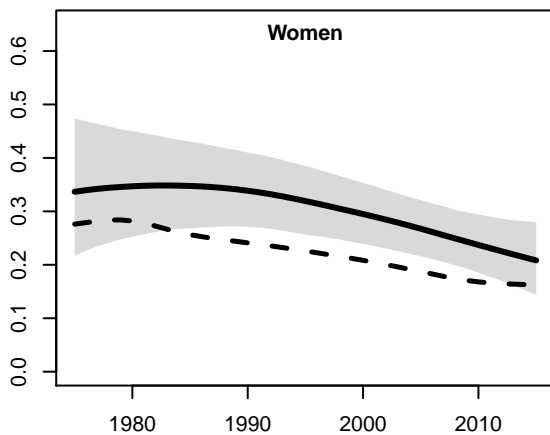

### Senegal

West Africa

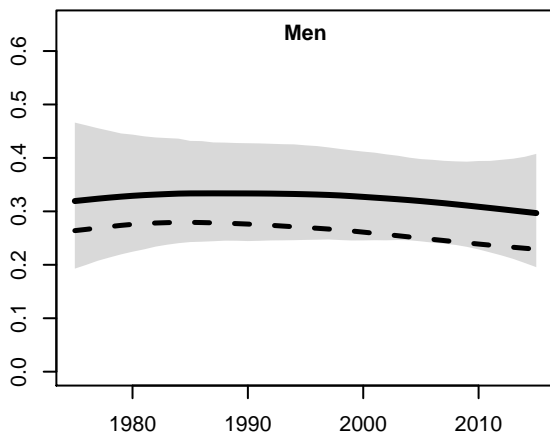

### Senegal

West Africa

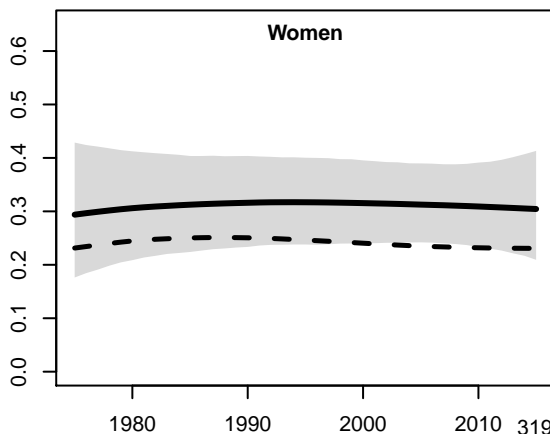

Age-standardised/Crude adult prevalence of raised blood pressure

**Serbia**

Central Europe

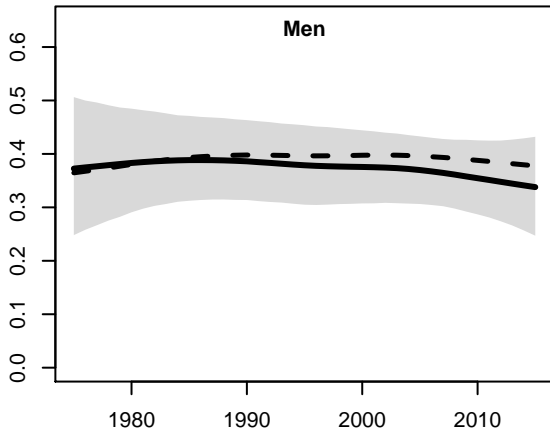**Serbia**

Central Europe

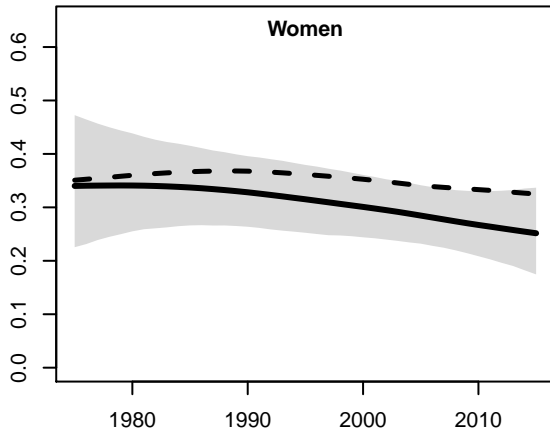**Seychelles**

East Africa

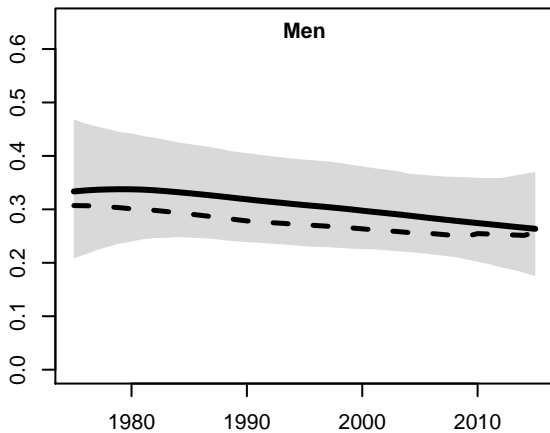**Seychelles**

East Africa

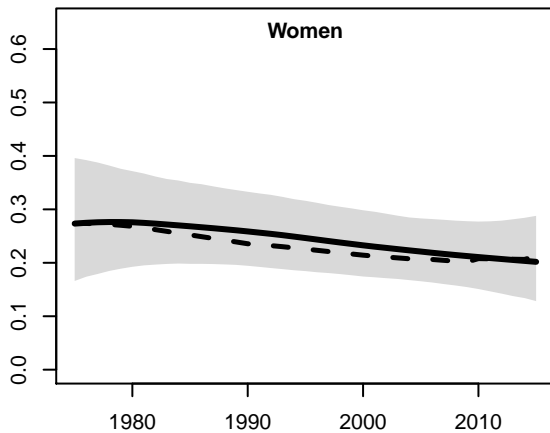**Sierra Leone**

West Africa

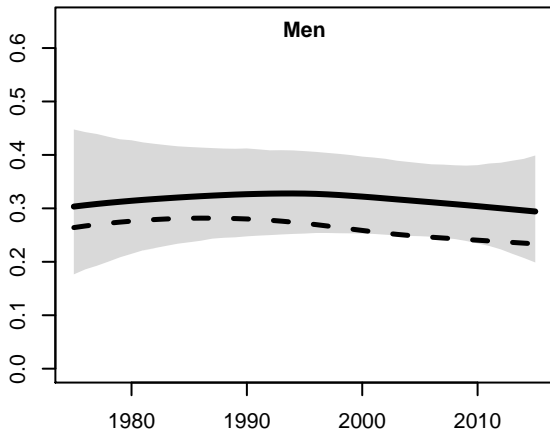**Sierra Leone**

West Africa

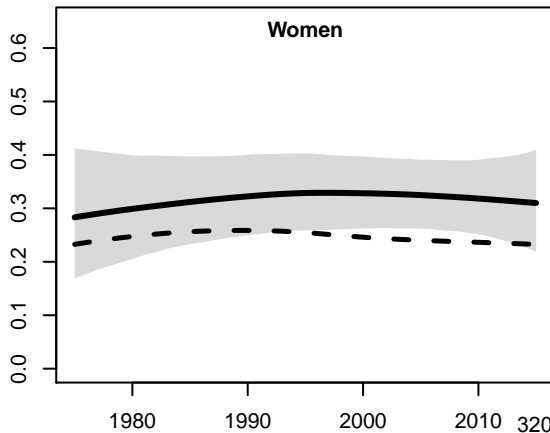

**Singapore**  
High-income Asia Pacific

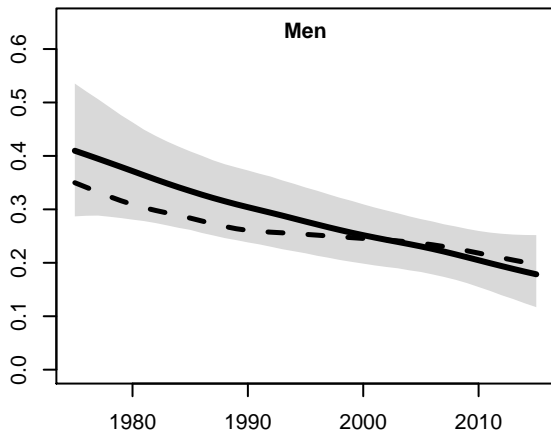

**Singapore**  
High-income Asia Pacific

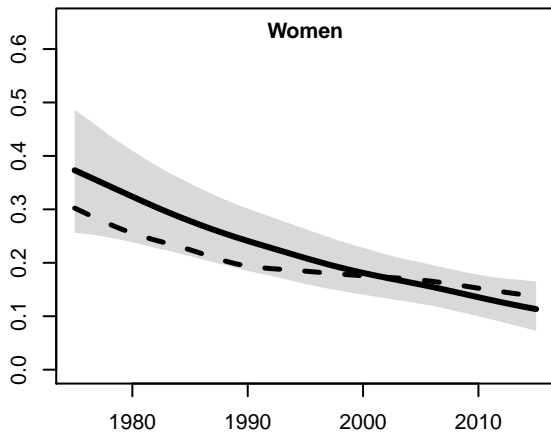

**Slovakia**  
Central Europe

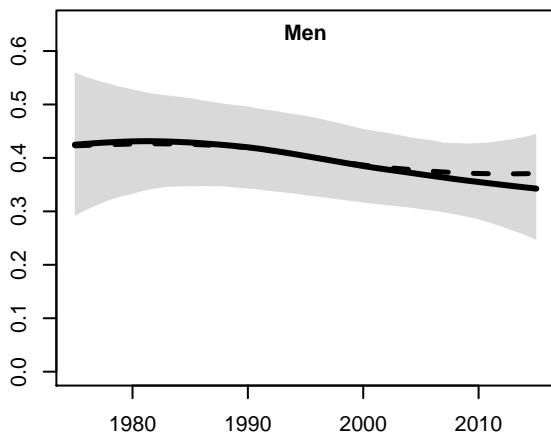

**Slovakia**  
Central Europe

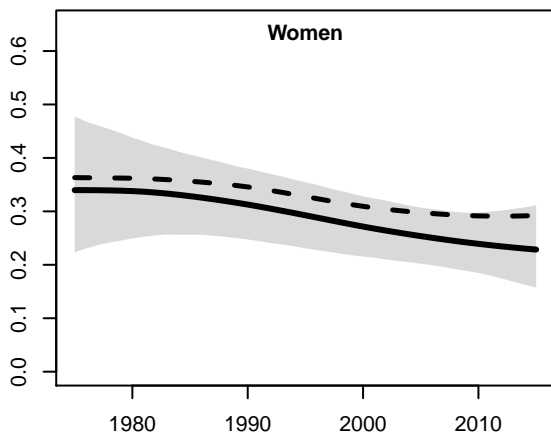

**Slovenia**  
Central Europe

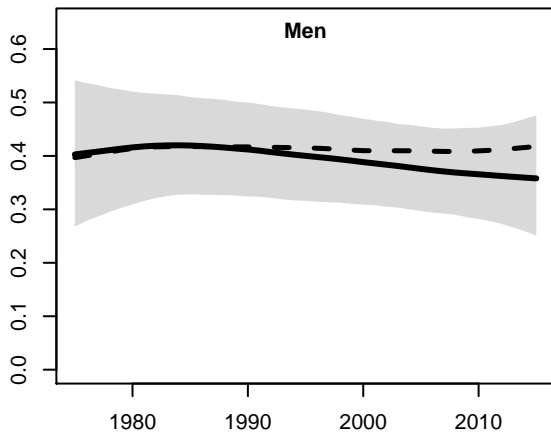

**Slovenia**  
Central Europe

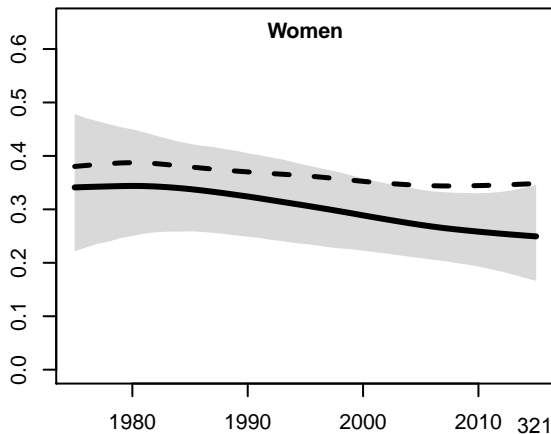

Age-standardised/Crude adult prevalence of raised blood pressure

**Solomon Islands**

Melanesia

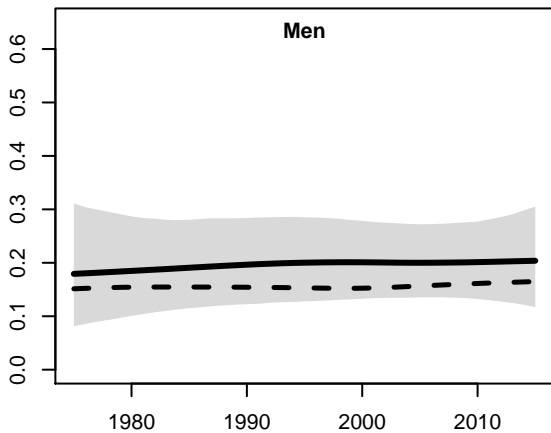**Solomon Islands**

Melanesia

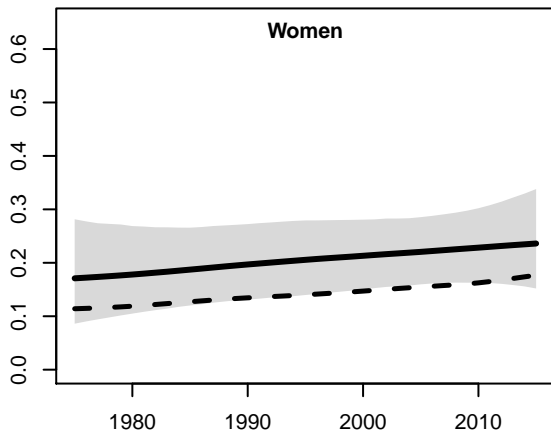**Somalia**

East Africa

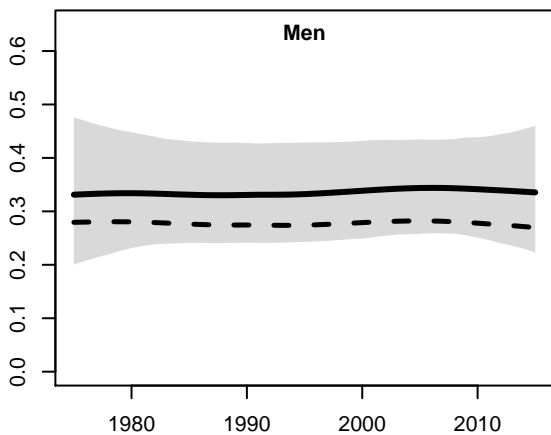**Somalia**

East Africa

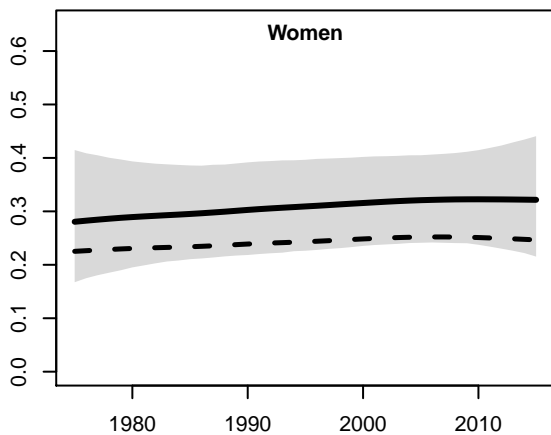**South Africa**

Southern Africa

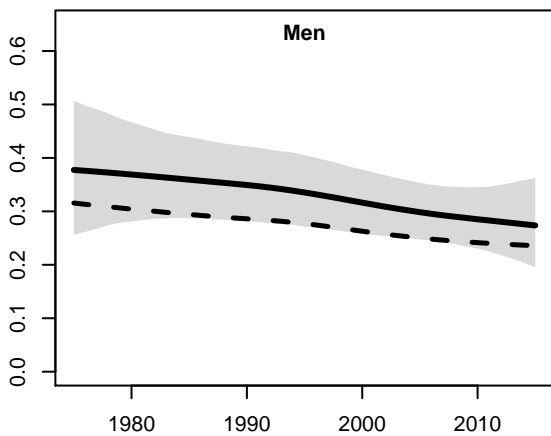**South Africa**

Southern Africa

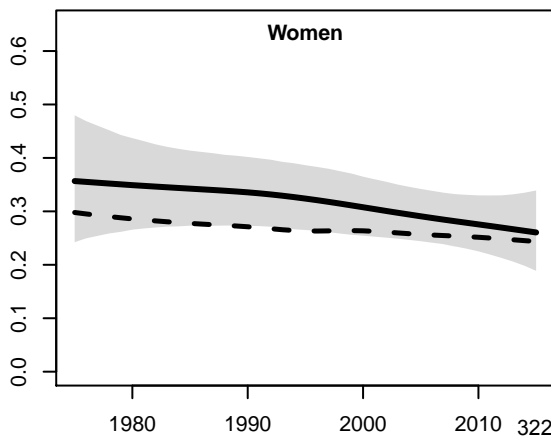

Age-standardised/Crude adult prevalence of raised blood pressure

**South Korea**  
High-income Asia Pacific

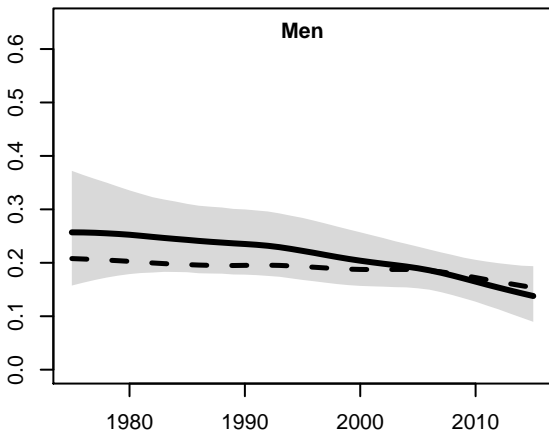

**South Korea**  
High-income Asia Pacific

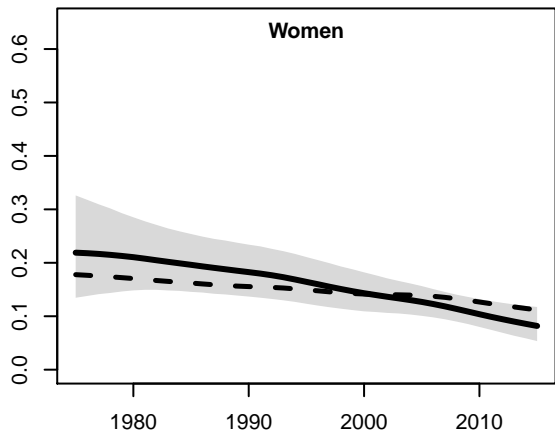

**Spain**  
South Western Europe

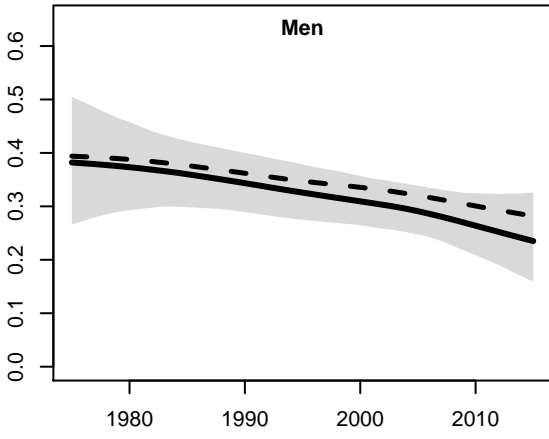

**Spain**  
South Western Europe

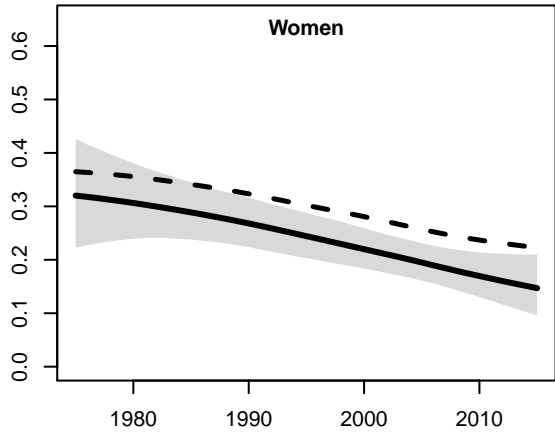

**Sri Lanka**  
Southeast Asia

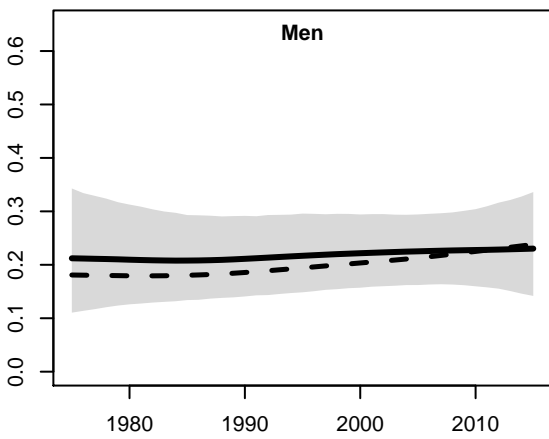

**Sri Lanka**  
Southeast Asia

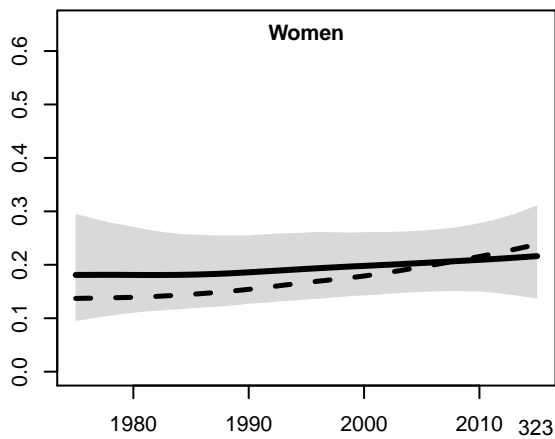

**Sudan**  
East Africa

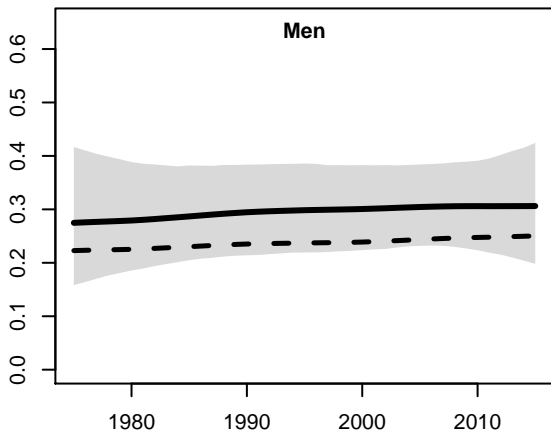

**Sudan**  
East Africa

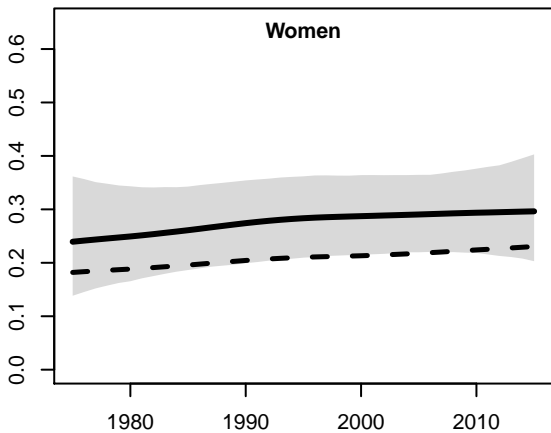

**Suriname**  
Caribbean

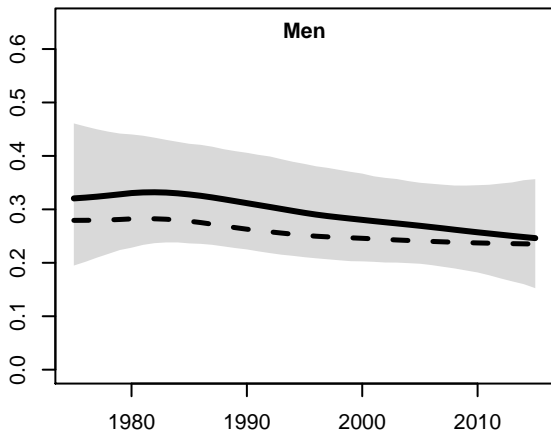

**Suriname**  
Caribbean

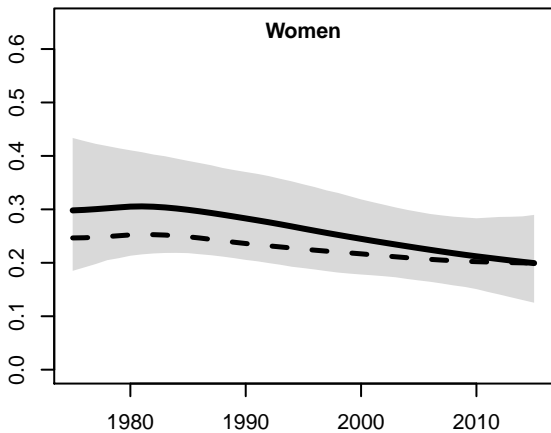

**Swaziland**  
Southern Africa

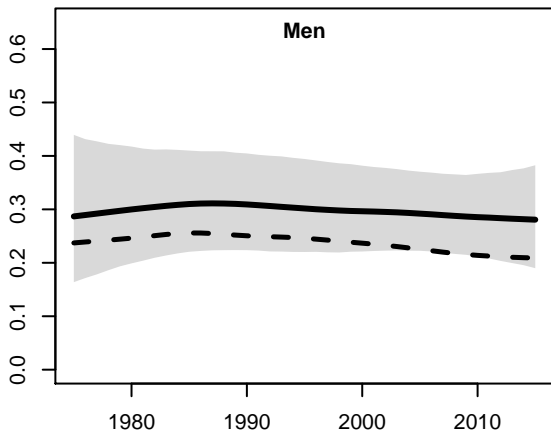

**Swaziland**  
Southern Africa

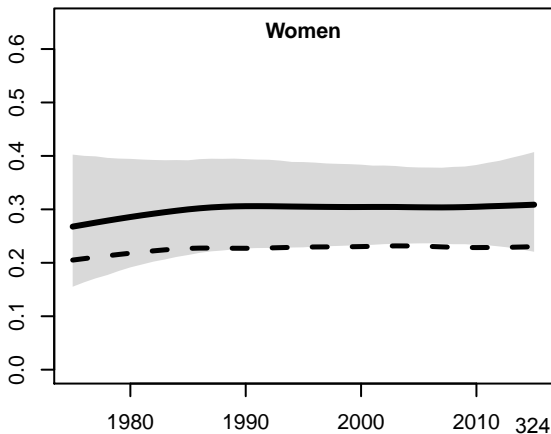

Age-standardised/Crude adult prevalence of raised blood pressure

Age-standardised/Crude adult prevalence of raised blood pressure

**Sweden**  
North Western Europe

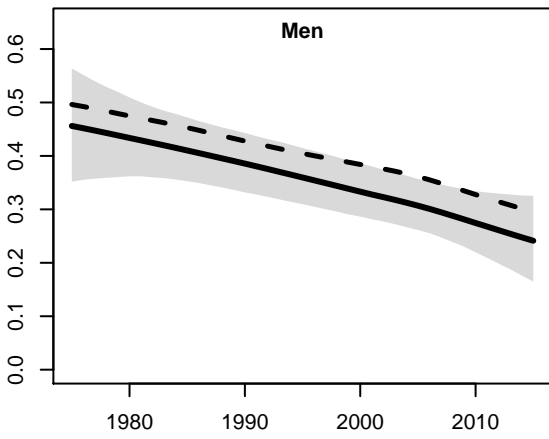

**Sweden**  
North Western Europe

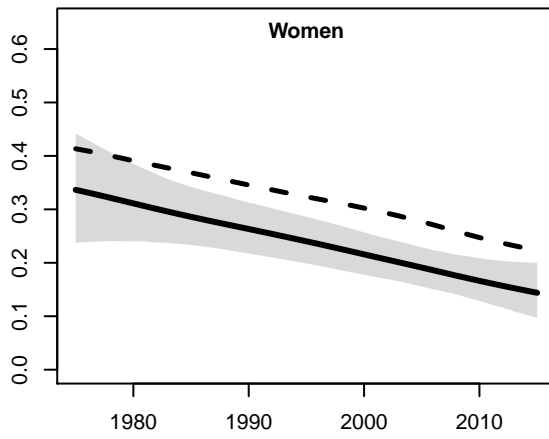

**Switzerland**  
North Western Europe

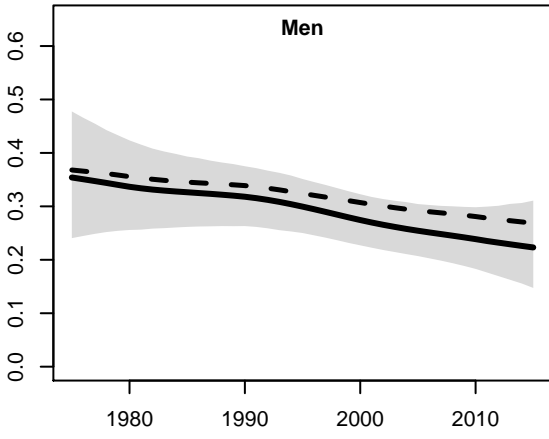

**Switzerland**  
North Western Europe

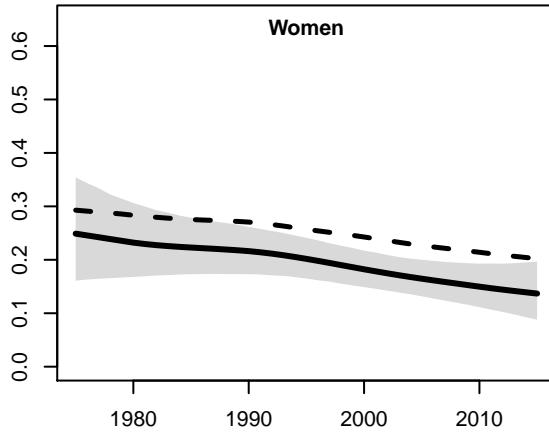

**Syrian Arab Republic**  
Middle East and North Africa

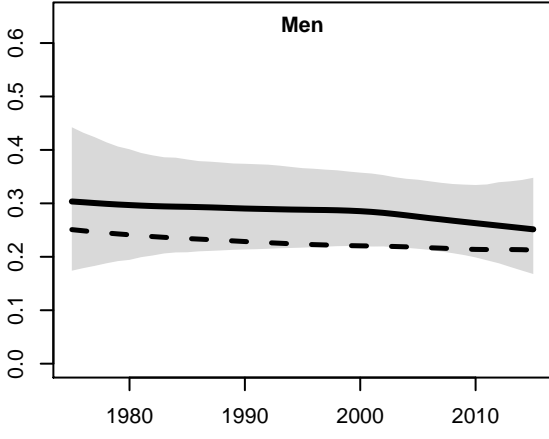

**Syrian Arab Republic**  
Middle East and North Africa

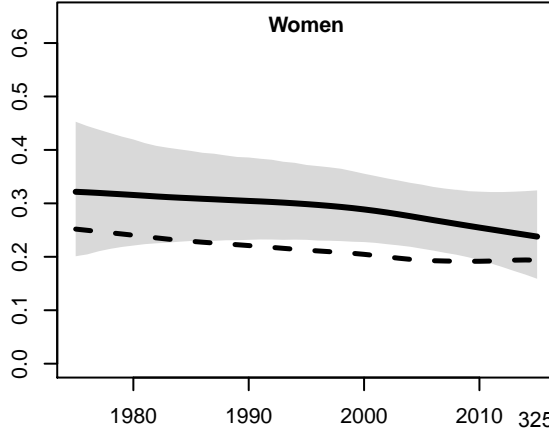

**Taiwan**  
East Asia

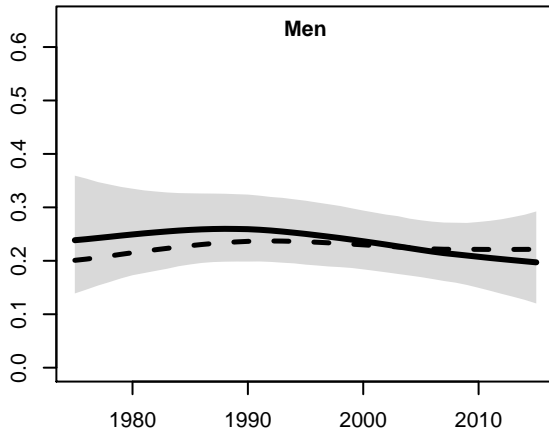

**Taiwan**  
East Asia

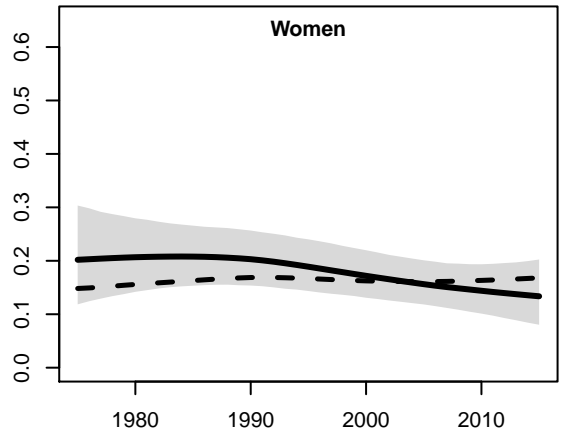

**Tajikistan**  
Central Asia

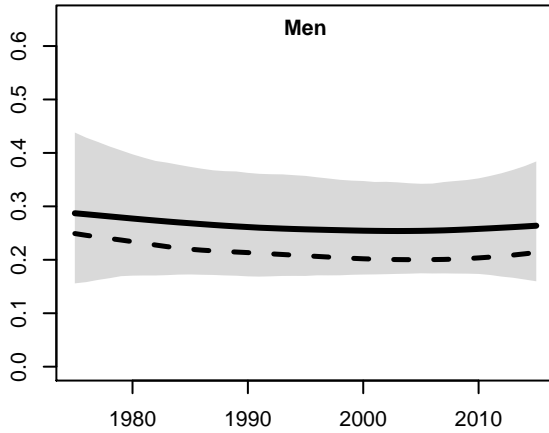

**Tajikistan**  
Central Asia

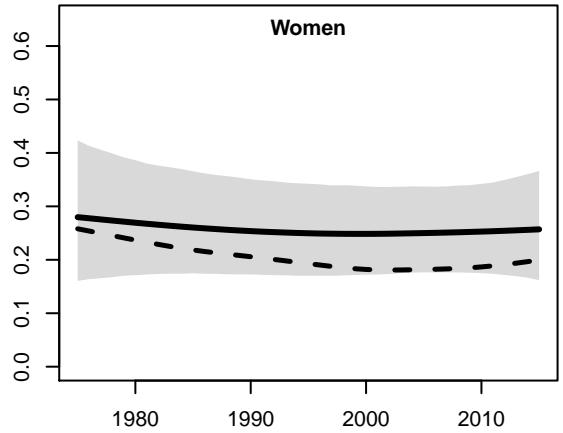

**Tanzania**  
East Africa

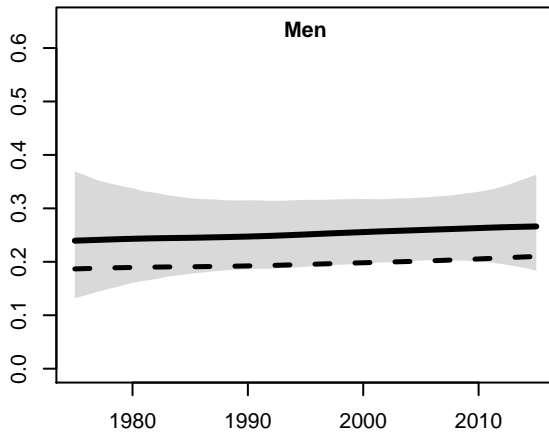

**Tanzania**  
East Africa

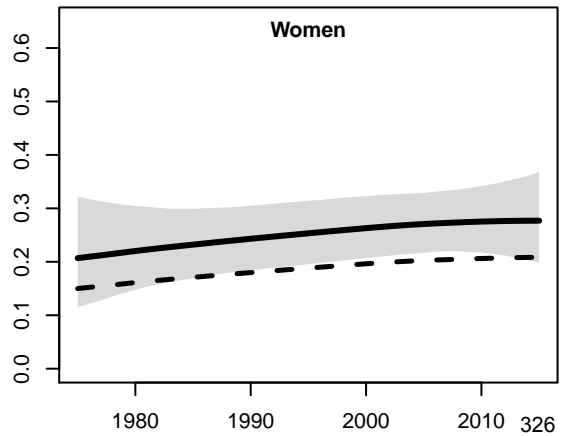



**Thailand**  
Southeast Asia

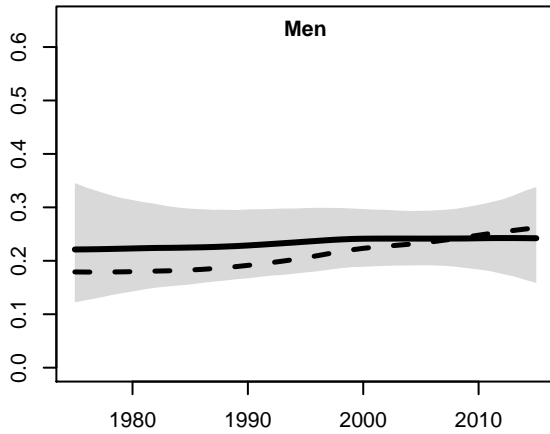

**Thailand**  
Southeast Asia

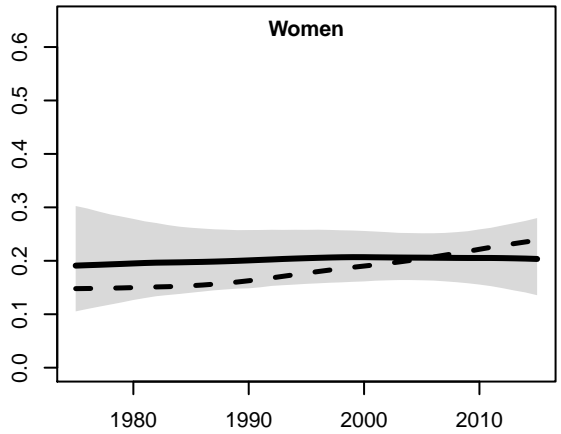

**Timor-Leste**  
Southeast Asia

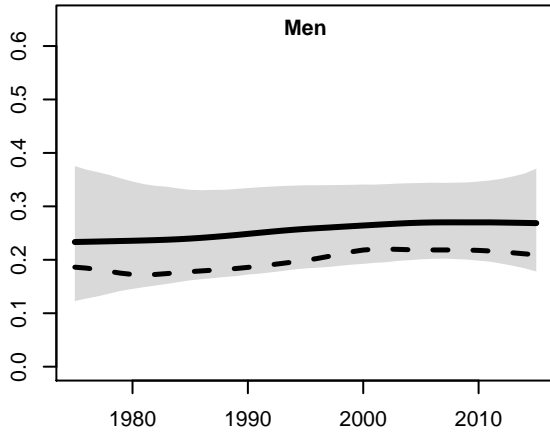

**Timor-Leste**  
Southeast Asia

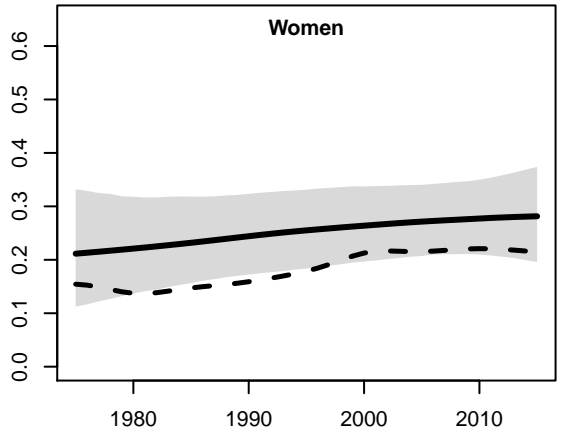

**Togo**  
West Africa

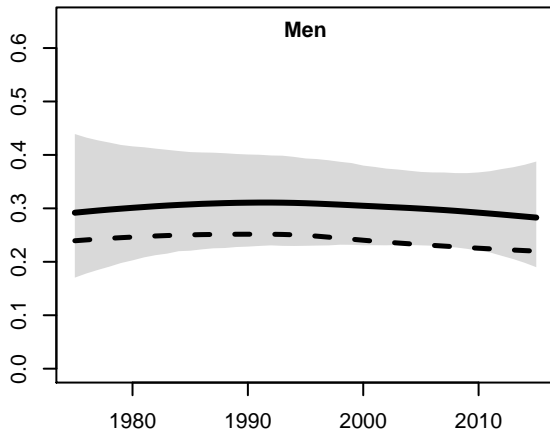

**Togo**  
West Africa

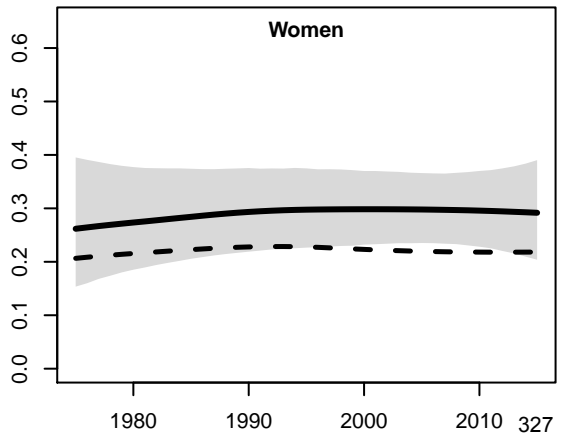

Age-standardised/Crude adult prevalence of raised blood pressure

**Tokelau**

Polynesia and Micronesia

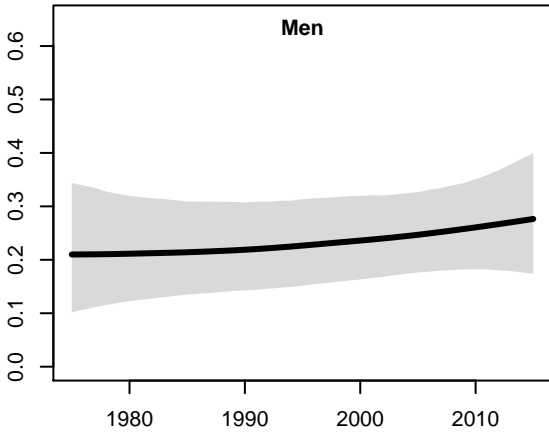

**Tokelau**

Polynesia and Micronesia

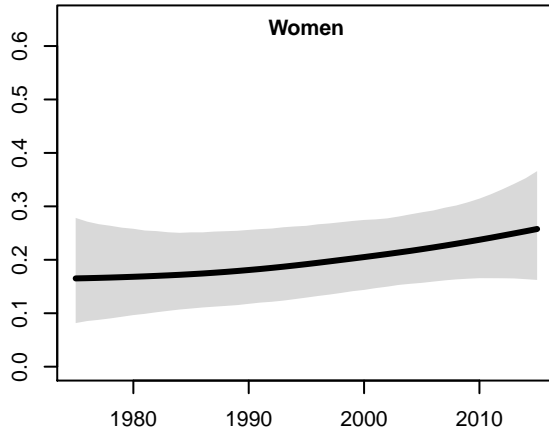

**Tonga**

Polynesia and Micronesia

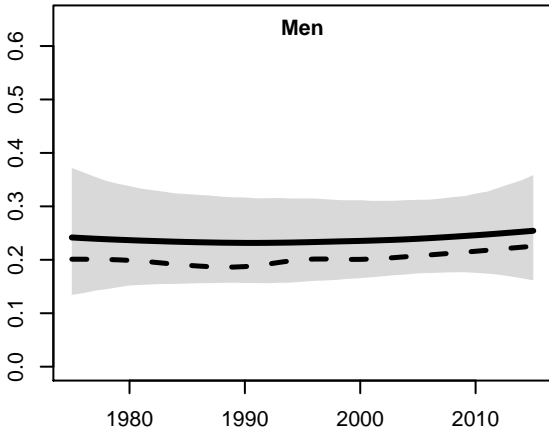

**Tonga**

Polynesia and Micronesia

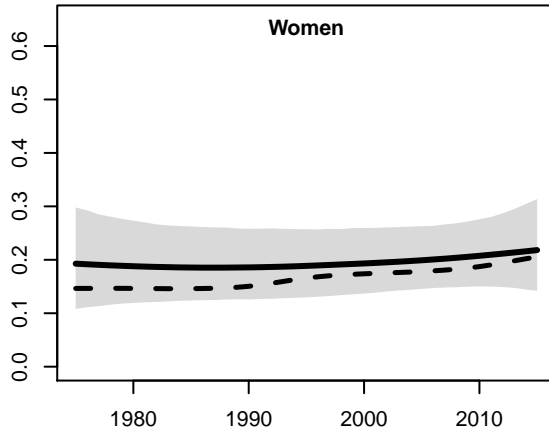

**Trinidad and Tobago**

Caribbean

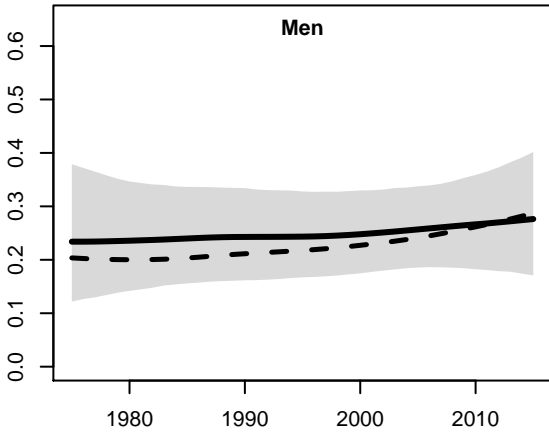

**Trinidad and Tobago**

Caribbean

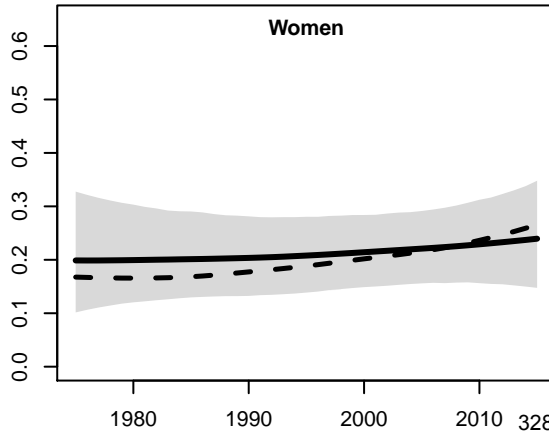

**Tunisia**  
Middle East and North Africa

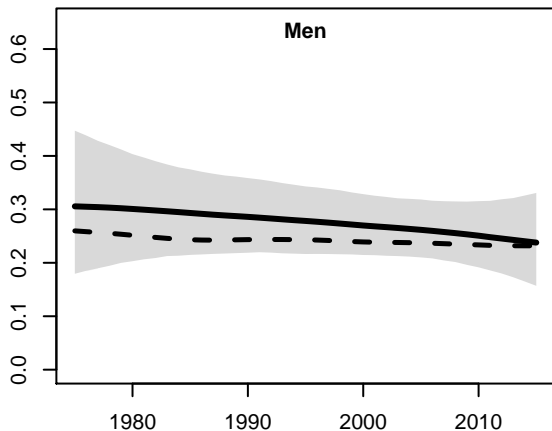

**Tunisia**  
Middle East and North Africa

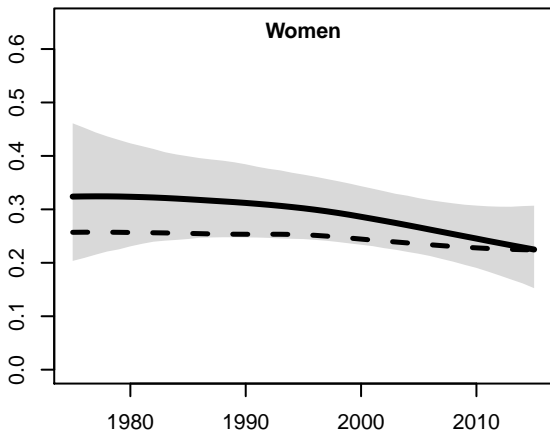

**Turkey**  
Middle East and North Africa

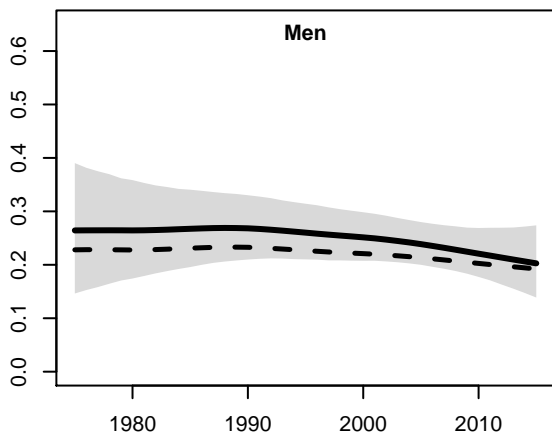

**Turkey**  
Middle East and North Africa

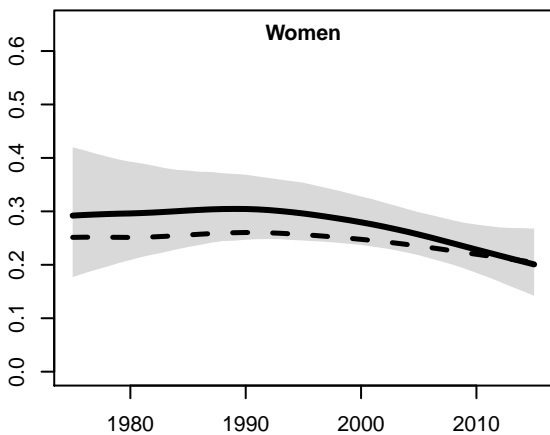

**Turkmenistan**  
Central Asia

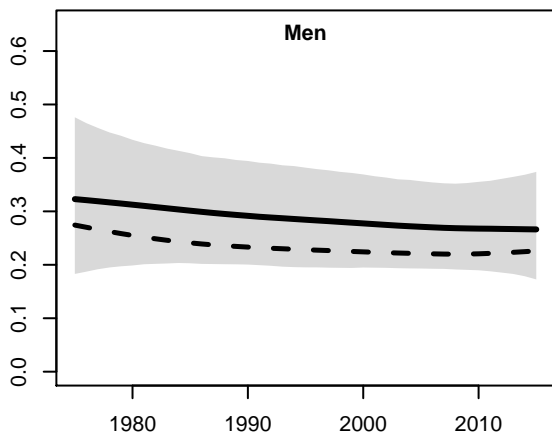

**Turkmenistan**  
Central Asia

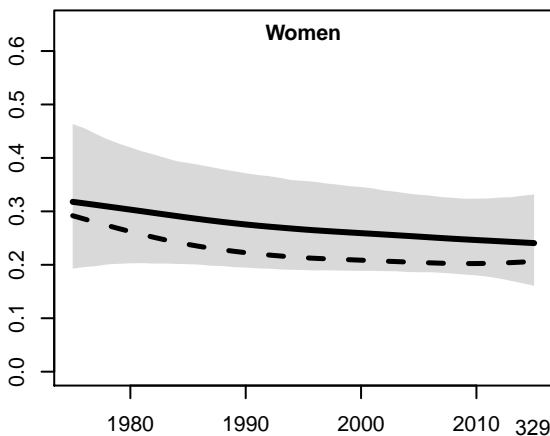

Age-standardised/Crude adult prevalence of raised blood pressure

**Tuvalu**  
Polynesia and Micronesia

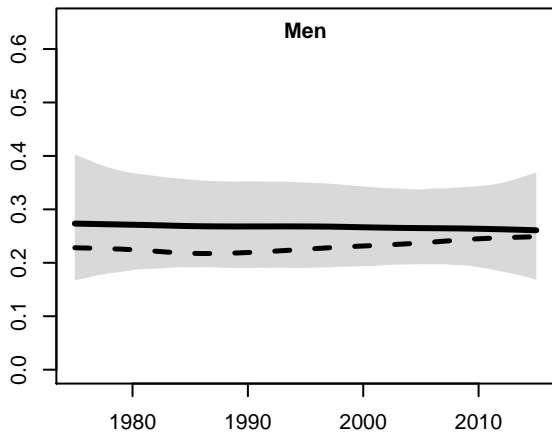

**Tuvalu**  
Polynesia and Micronesia

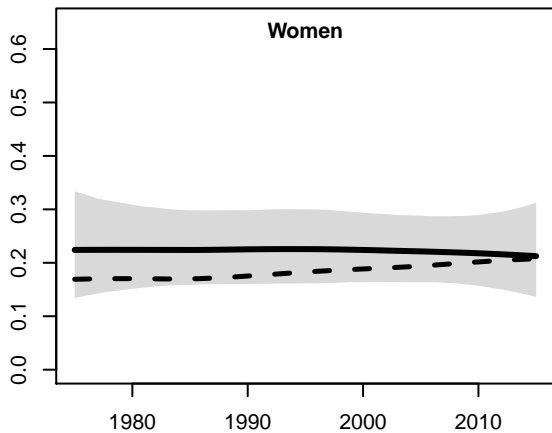

**Uganda**  
East Africa

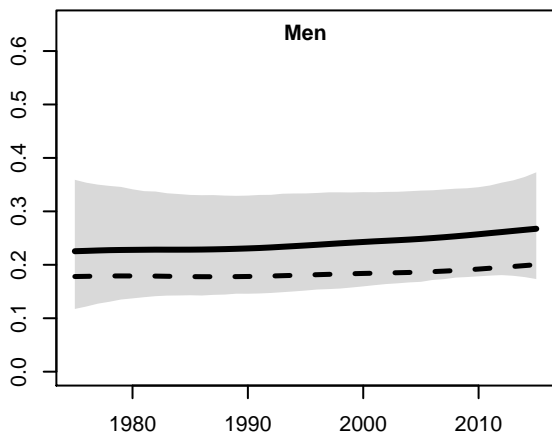

**Uganda**  
East Africa

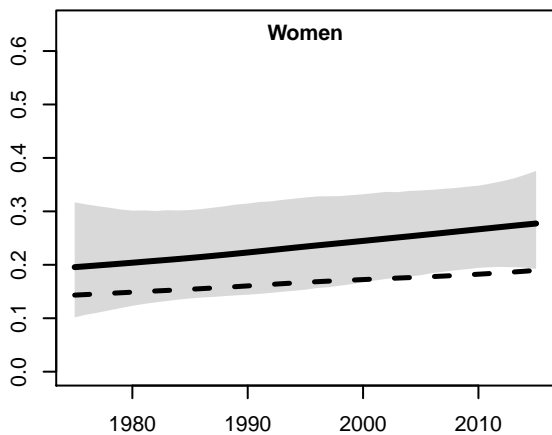

**Ukraine**  
Eastern Europe

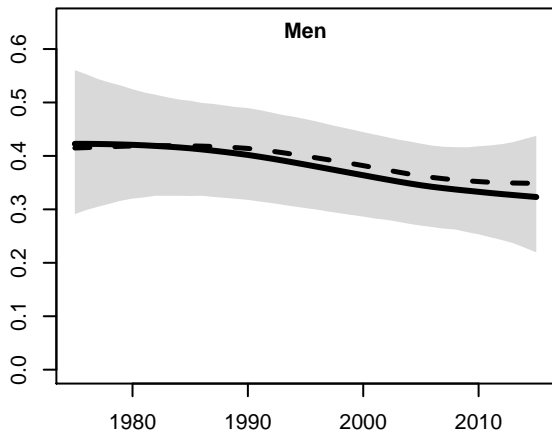

**Ukraine**  
Eastern Europe

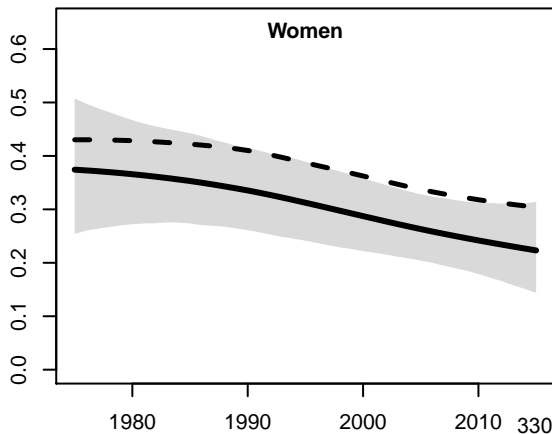

Age-standardised/Crude adult prevalence of raised blood pressure

**United Arab Emirates**  
Middle East and North Africa

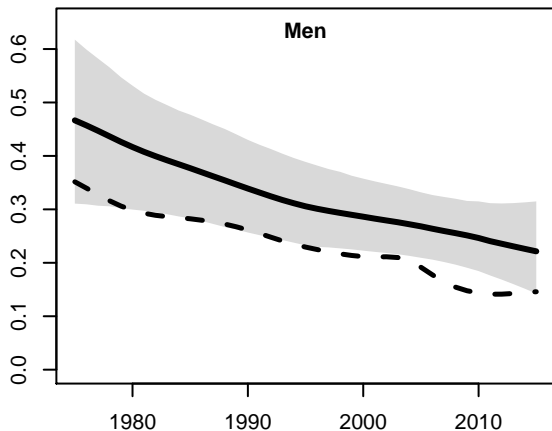

**United Arab Emirates**  
Middle East and North Africa

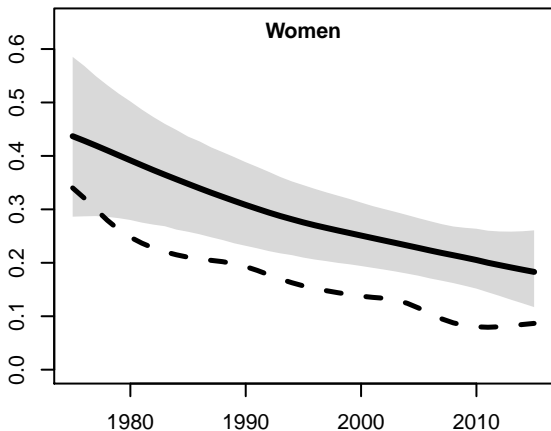

**United Kingdom**  
High-income English-speaking countries

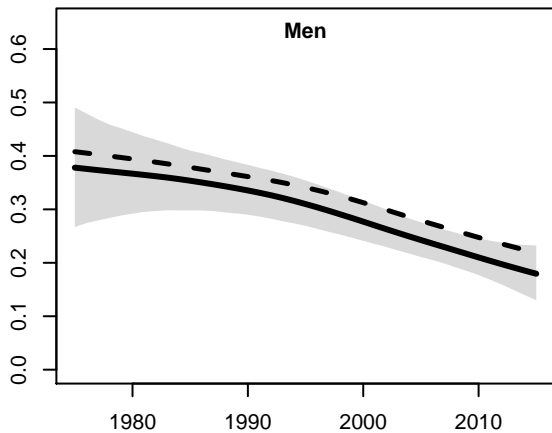

**United Kingdom**  
High-income English-speaking countries

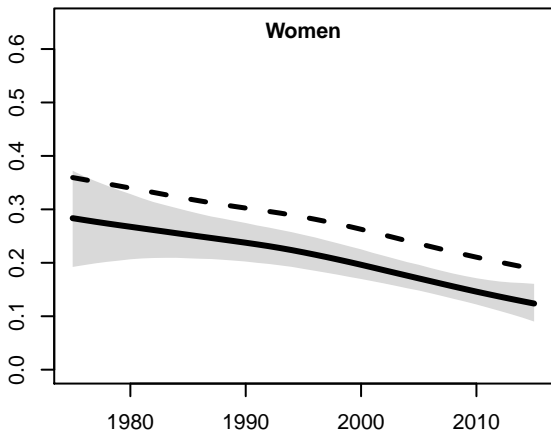

**United States of America**  
High-income English-speaking countries

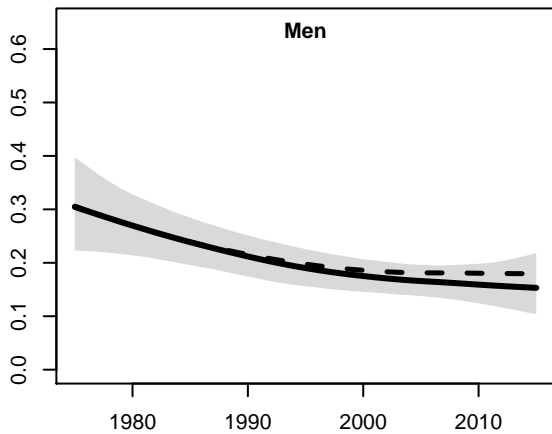

**United States of America**  
High-income English-speaking countries

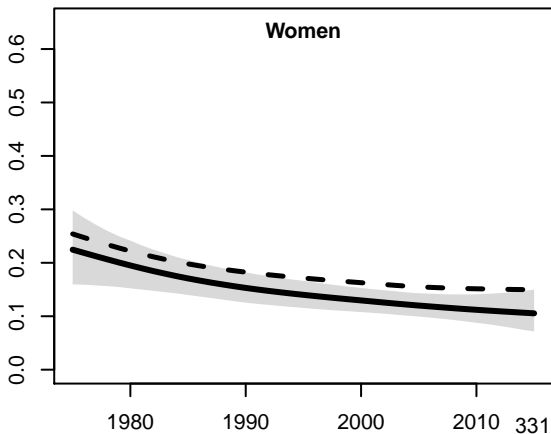

Age-standardised/Crude adult prevalence of raised blood pressure

**Uruguay**  
Southern and Tropical Latin America

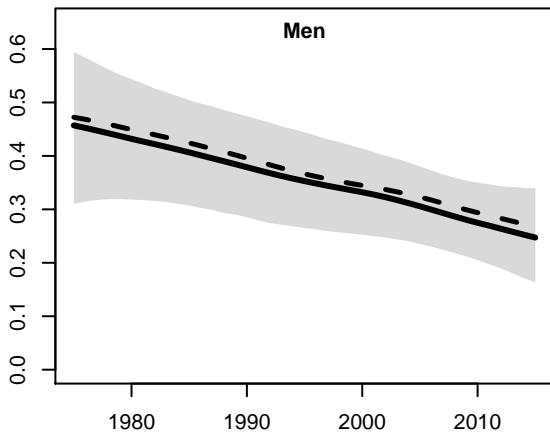

**Uruguay**  
Southern and Tropical Latin America

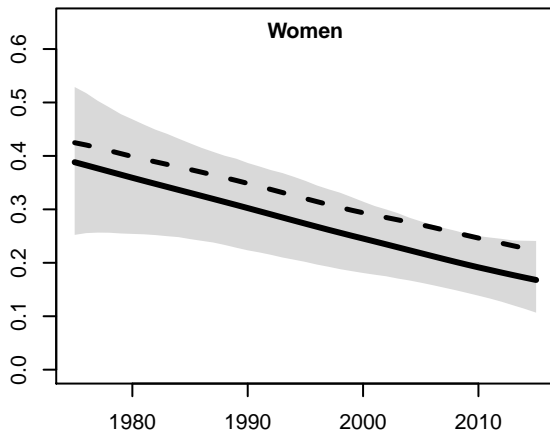

**Uzbekistan**  
Central Asia

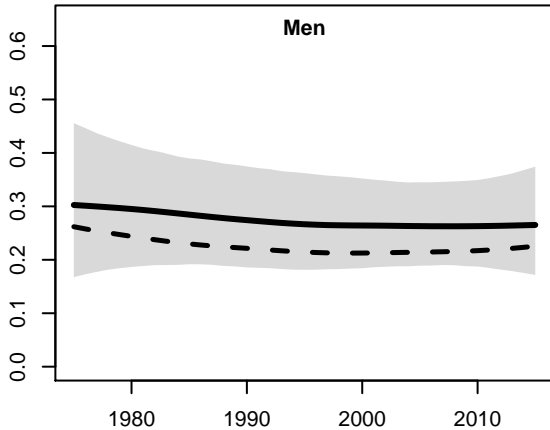

**Uzbekistan**  
Central Asia

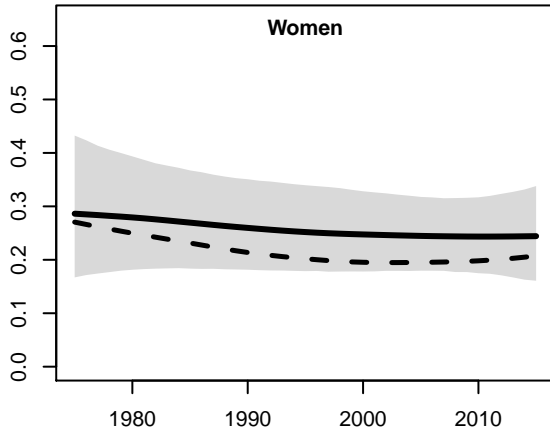

**Vanuatu**  
Melanesia

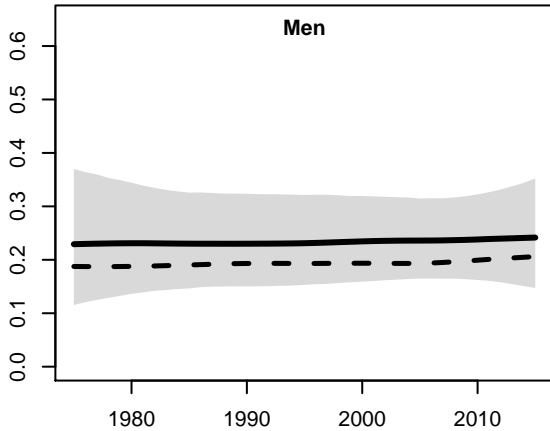

**Vanuatu**  
Melanesia

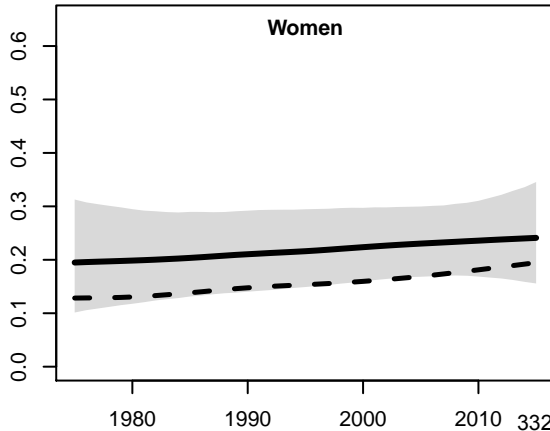

**Venezuela**  
Central Latin America

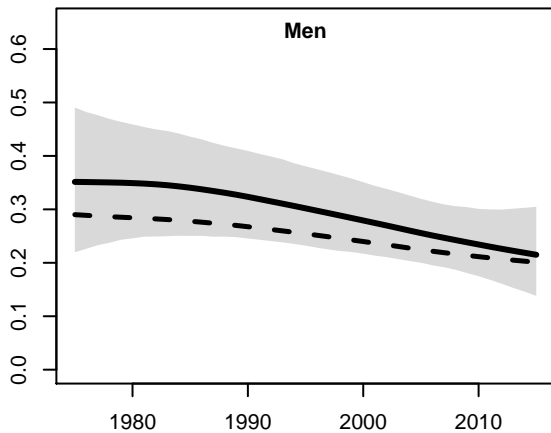

**Venezuela**  
Central Latin America

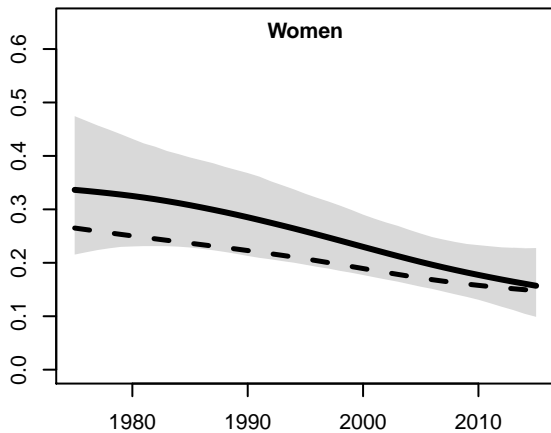

**Viet Nam**  
Southeast Asia

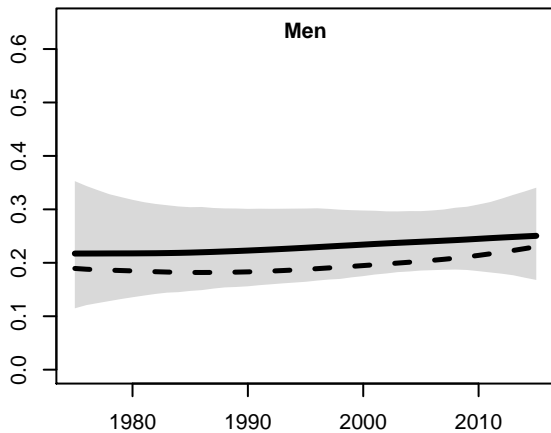

**Viet Nam**  
Southeast Asia

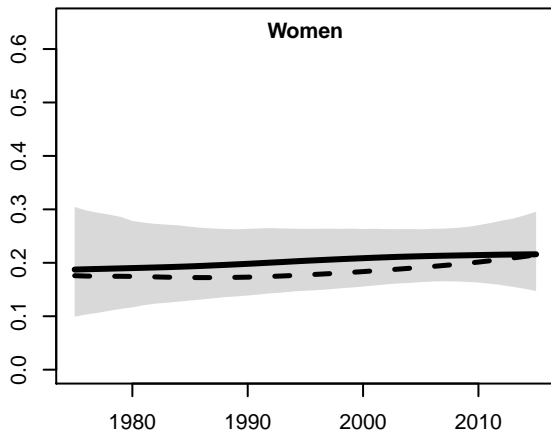

**Yemen**  
Middle East and North Africa

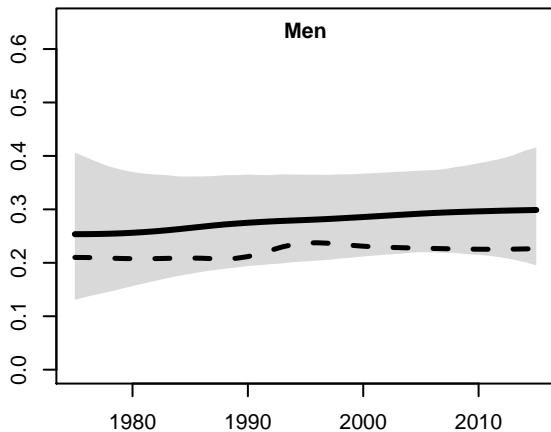

**Yemen**  
Middle East and North Africa

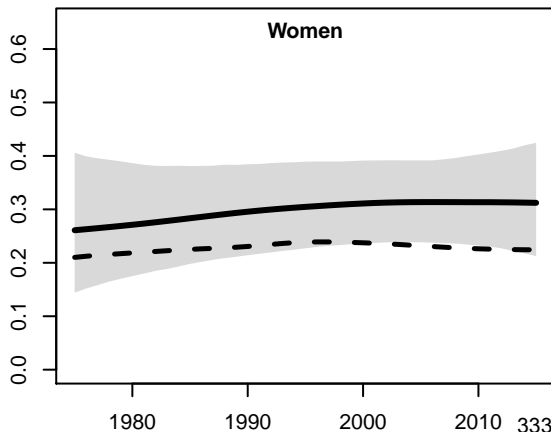

Age-standardised/Crude adult prevalence of raised blood pressure

**Zambia**  
East Africa

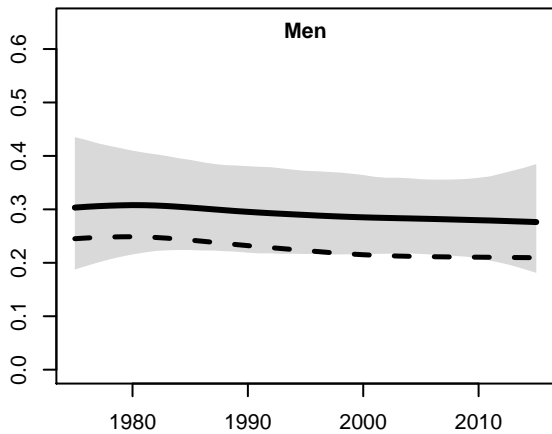

**Zambia**  
East Africa

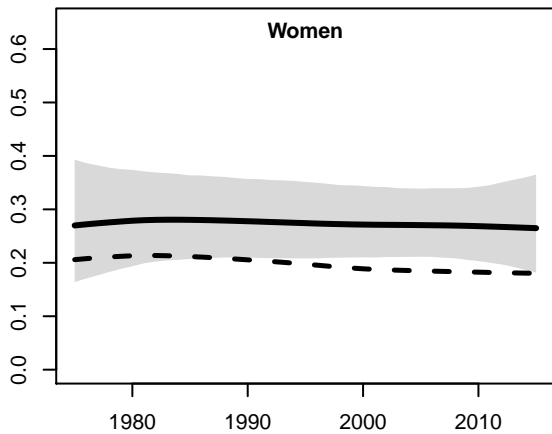

**Zimbabwe**  
Southern Africa

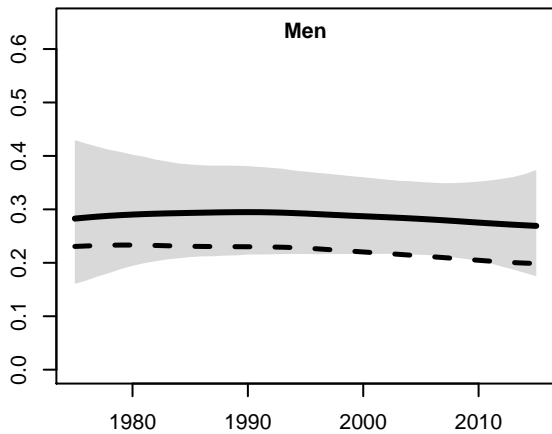

**Zimbabwe**  
Southern Africa

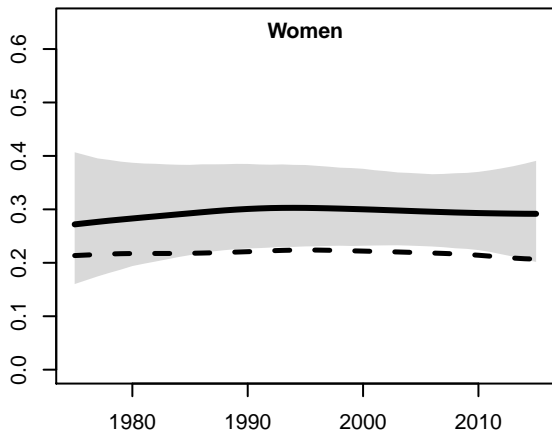

Age-standardised/Crude adult prevalence of raised blood pressure



## References

1. Finucane MM, Stevens GA, Cowan MJ, et al. National, regional, and global trends in body-mass index since 1980: systematic analysis of health examination surveys and epidemiological studies with 960 country-years and 9.1 million participants. *Lancet* 2011; **377**(9765): 557-67.
2. Danaei G, Finucane MM, Lin JK, et al. National, regional, and global trends in systolic blood pressure since 1980: systematic analysis of health examination surveys and epidemiological studies with 786 country-years and 5.4 million participants. *Lancet* 2011; **377**(9765): 568-77.
3. Danaei G, Finucane MM, Lu Y, et al. National, regional, and global trends in fasting plasma glucose and diabetes prevalence since 1980: systematic analysis of health examination surveys and epidemiological studies with 370 country-years and 2.7 million participants. *Lancet* 2011; **378**(9785): 31-40.
4. Farzadfar F, Finucane MM, Danaei G, et al. National, regional, and global trends in serum total cholesterol since 1980: systematic analysis of health examination surveys and epidemiological studies with 321 country-years and 3.0 million participants. *Lancet* 2011; **377**(9765): 578-86.
5. NCD Risk Factor Collaboration. Trends in adult body-mass index in 200 countries from 1975 to 2014: a pooled analysis of 1698 population-based measurement studies with 19.2 million participants. *Lancet* 2016; **387**(10026): 1377-96.
6. NCD Risk Factor Collaboration. A century of trends in adult human height. *eLife* 2016; **5**: e13410.
7. NCD Risk Factor Collaboration. Worldwide trends in diabetes since 1980: a pooled analysis of 751 population-based studies with 4.4 million participants. *Lancet* 2016; **387**(10027): 1513-30.
8. Schwarz G. Estimating Dimension of a Model. *Ann Stat* 1978; **6**(2): 461-4.
9. Danaei G, Singh GM, Paciorek CJ, et al. The global cardiovascular risk transition: associations of four metabolic risk factors with national income, urbanization, and Western diet in 1980 and 2008. *Circulation* 2013; **127**(14): 1493-502, 502e1-8.
10. Ezzati M, Riboli E. Behavioral and dietary risk factors for noncommunicable diseases. *N Engl J Med* 2013; **369**(10): 954-64.
11. Nakagawa S, Schielzeth H. A general and simple method for obtaining R<sup>2</sup> from generalized linear mixed-effects models. *Methods Ecol Evol* 2013; **4**(2): 133-42.
12. McFadden D. Conditional Logit Analysis of Qualitative Choice Behavior. In: Zarembka P, ed. *Frontiers in econometrics*: Academic Press; 1974: 105-42.
